# Supplementary material for: Understanding the Impact of Drought in Coffea Genotypes: Transcriptomic Analysis Supports a Common High Resilience to Moderate Water Deficit but a Genotype Dependent Sensitivity to Severe Water Deficit
Source: MDPI journal article supplement (doi:10.3390/agronomy11112255), 2021-11-08
Supplement: s1 [file s1]

Archive with 12 entries (12 files):
- Figure_S1.pdf
- Figure_S2.pdf
- Figure_S3.pdf
- Table_S1.pdf
- Table_S2.pdf
- Table_S3.xlsx
- Table_S4.xlsx
- Table_S5.xlsx
- Table_S6.xlsx
- Table_S7.pdf
- Table_S8.pdf
- Table_S9.pdf
