# Supplementary material for: Understanding the Impact of Drought in Coffea Genotypes: Transcriptomic Analysis Supports a Common High Resilience to Moderate Water Deficit but a Genotype Dependent Sensitivity to Severe Water Deficit
Source: MDPI journal article supplement (doi:10.3390/agronomy11112255), 2021-11-08
Supplement: s1 [file s1]

**Table S1.** Summary of sequencing and mapping of reads from *Coffee arabica* cv. Icatu (Icatu) and *C. canephora* cv. CL153 (CL153) samples. A, B, C, D and E correspond to biological replications. Plants were grown in two different stress water conditions, mild water deficit (MWD) and severe water deficit (SWD) and the control well-watered plants (WW). RAW READS: number of reads obtained after sequencing. CLEAN READS: number of reads passing the Illumina quality filters and downstream filters. % CLEAN: percentage of reads passing filters compared to the number of raw reads. UNIQUE: number of reads aligned to a unique position. % UNIQUE: proportion of reads aligned to a unique position compared to the number of clean reads. MULTIPLE MAP: number of reads aligned to exons of several overlapping genes. % MULTIPLE MAP: proportion of reads aligned to exons of several overlapping genes compared to the number of clean reads. % UNMAPPED: proportion of non-aligning reads compared to the number of clean reads.

| Genotype | Water | Replicates | Raw reads | Clean Reads | %<br>Clean | Uniquely<br>mapped reads | %<br>Unique | Multiple<br>mapped reads | %<br>Multiple | Unmapped<br>reads | %<br>Unmapped |
|----------|-------|------------|-----------|-------------|------------|--------------------------|-------------|--------------------------|---------------|-------------------|---------------|
| CL153    | WW    | 1A         | 21337820  | 21166015    | 99,19      | 18119214                 | 85.61       | 1071051                  | 5.06          | 1975750           | 9.34          |
|          |       | 1B         | 19886216  | 19606899    | 98,60      | 17382958                 | 88.66       | 600843                   | 3.06          | 1623098           | 8.28          |
|          |       | 1C         | 23700779  | 23418328    | 98,81      | 20008799                 | 85.44       | 954443                   | 4.07          | 2455086           | 10.49         |
|          | MWD   | 2A         | 19019627  | 18700442    | 98,32      | 16293027                 | 87.13       | 650797                   | 3.48          | 1756618           | 9.39          |
|          |       | 2B         | 29050476  | 28756701    | 98,99      | 23562063                 | 81.94       | 1275745                  | 4.44          | 3918893           | 13.63         |
|          |       | 2C         | 43271586  | 42915796    | 99,18      | 35257277                 | 82.15       | 1868277                  | 4.35          | 5790242           | 13.49         |
|          | SWD   | 3A         | 21944385  | 21636617    | 98,60      | 19976803                 | 92.33       | 74823                    | 3.32          | 942368            | 4.35          |
|          |       | 3B         | 25523224  | 25321726    | 99,21      | 22395852                 | 88.45       | 1055158                  | 4.17          | 1870716           | 7.39          |
|          |       | 3C         | 21988087  | 21700743    | 98,69      | 17293826                 | 79.69       | 857330                   | 3.95          | 3549587           | 16.36         |
| Average  |       |            | 25080244  | 24802585    | 99         | 21143313                 | 86          | 934274                   | 4             | 2653595           | 10            |
| Icatu    | WW    | 7A         | 26528307  | 26217078    | 98,83      | 20027252                 | 76.39       | 1829619                  | 6.98          | 4360207           | 16.63         |
|          |       | 7B         | 22009479  | 21720630    | 98,69      | 17324377                 | 79.76       | 748790                   | 3.45          | 3647463           | 16.79         |
|          |       | 7C         | 18666431  | 18338261    | 98,24      | 15374966                 | 83.84       | 1001133                  | 5.46          | 1962162           | 10.70         |
|          | MWD   | 8A         | 20273543  | 19956525    | 98,44      | 16395673                 | 82.16       | 1112258                  | 5.57          | 2448594           | 12.27         |
|          |       | 20B        | 19550984  | 19259626    | 98,51      | 15297995                 | 79.43       | 932545                   | 4.84          | 3029086           | 15.72         |

|                |            |          |          |       |          |       |         |      |         |       |
|----------------|------------|----------|----------|-------|----------|-------|---------|------|---------|-------|
|                | <b>20C</b> | 24311127 | 23954337 | 98,53 | 18151673 | 75.78 | 1103856 | 4.61 | 4698808 | 19.61 |
| <b>SWD</b>     | <b>9B</b>  | 19857280 | 19590779 | 98,66 | 15607946 | 79.67 | 817880  | 4.17 | 3164953 | 16.15 |
|                | <b>9C</b>  | 21199998 | 20864141 | 98,42 | 15317367 | 73.41 | 1169088 | 5.61 | 4377686 | 20.98 |
|                | <b>9E</b>  | 34865625 | 34628040 | 99,32 | 26618671 | 76.87 | 2192909 | 6.34 | 5816460 | 16.80 |
| <b>Average</b> |            | 23029197 | 22725491 | 99    | 17790658 | 79    | 1212009 | 5    | 3722824 | 16    |
