# Supplementary material for: Understanding the Impact of Drought in Coffea Genotypes: Transcriptomic Analysis Supports a Common High Resilience to Moderate Water Deficit but a Genotype Dependent Sensitivity to Severe Water Deficit
Source: MDPI journal article supplement (doi:10.3390/agronomy11112255), 2021-11-08
Supplement: s1 [file s1 › Figure_S1.pdf]

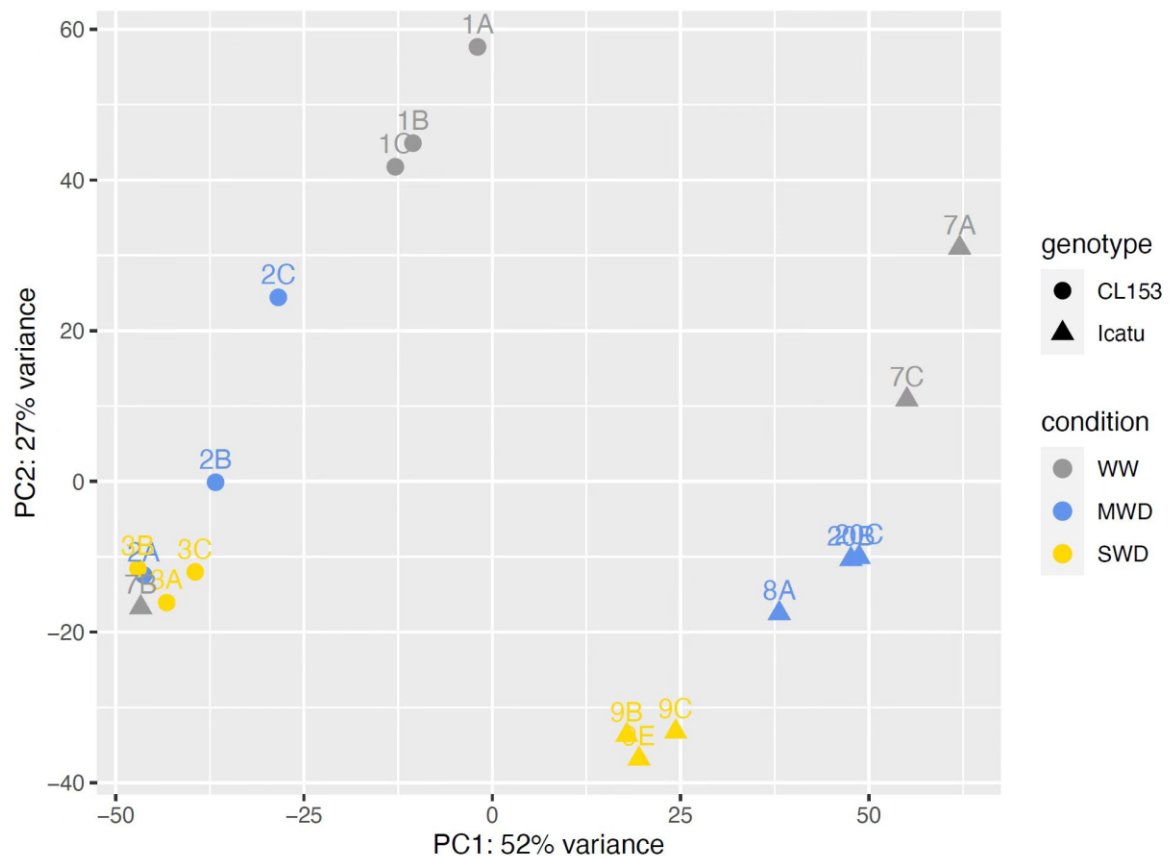

**Figure S1.** Principal component (PC) analysis of all log transformed gene expression data from *Coffea canephora* cv. Conilon Clone CL153 (CL153) and *C. arabica* cv. Icatu (Icatu) plants submitted to three different water availability conditions: well-watered (WW), moderate water deficit (MWD), and severe water deficit (SWD). A, B, C, D, and E correspond to biological replications. Each treatment is represented by the colors depicted in Figure 1 and contains three biological replicates, depicted in Table S1. The percentage of variance is indicated in each axis.
