# Supplementary material for: Understanding the Impact of Drought in Coffea Genotypes: Transcriptomic Analysis Supports a Common High Resilience to Moderate Water Deficit but a Genotype Dependent Sensitivity to Severe Water Deficit
Source: MDPI journal article supplement (doi:10.3390/agronomy11112255), 2021-11-08
Supplement: s1 [file s1 › Figure_S2.pdf]

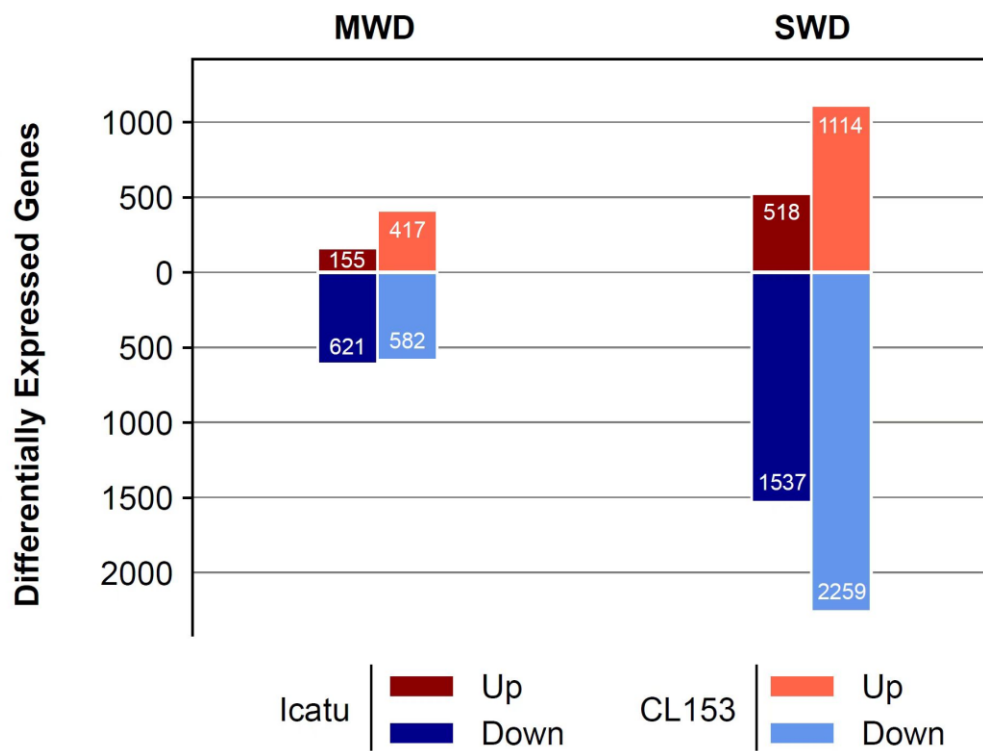

**Figure S2.** The effect of moderate (MWD) and severe (SWD) water deficit on the number of up- and down-regulated DEGs in plants of *Coffea canephora* cv. Conilon Clone CL153 (CL153) and *C. arabica* cv. Icatu (Icatu).
