# Supplementary material for: Understanding the Impact of Drought in Coffea Genotypes: Transcriptomic Analysis Supports a Common High Resilience to Moderate Water Deficit but a Genotype Dependent Sensitivity to Severe Water Deficit
Source: MDPI journal article supplement (doi:10.3390/agronomy11112255), 2021-11-08
Supplement: s1 [file s1 › Figure_S3.pdf]

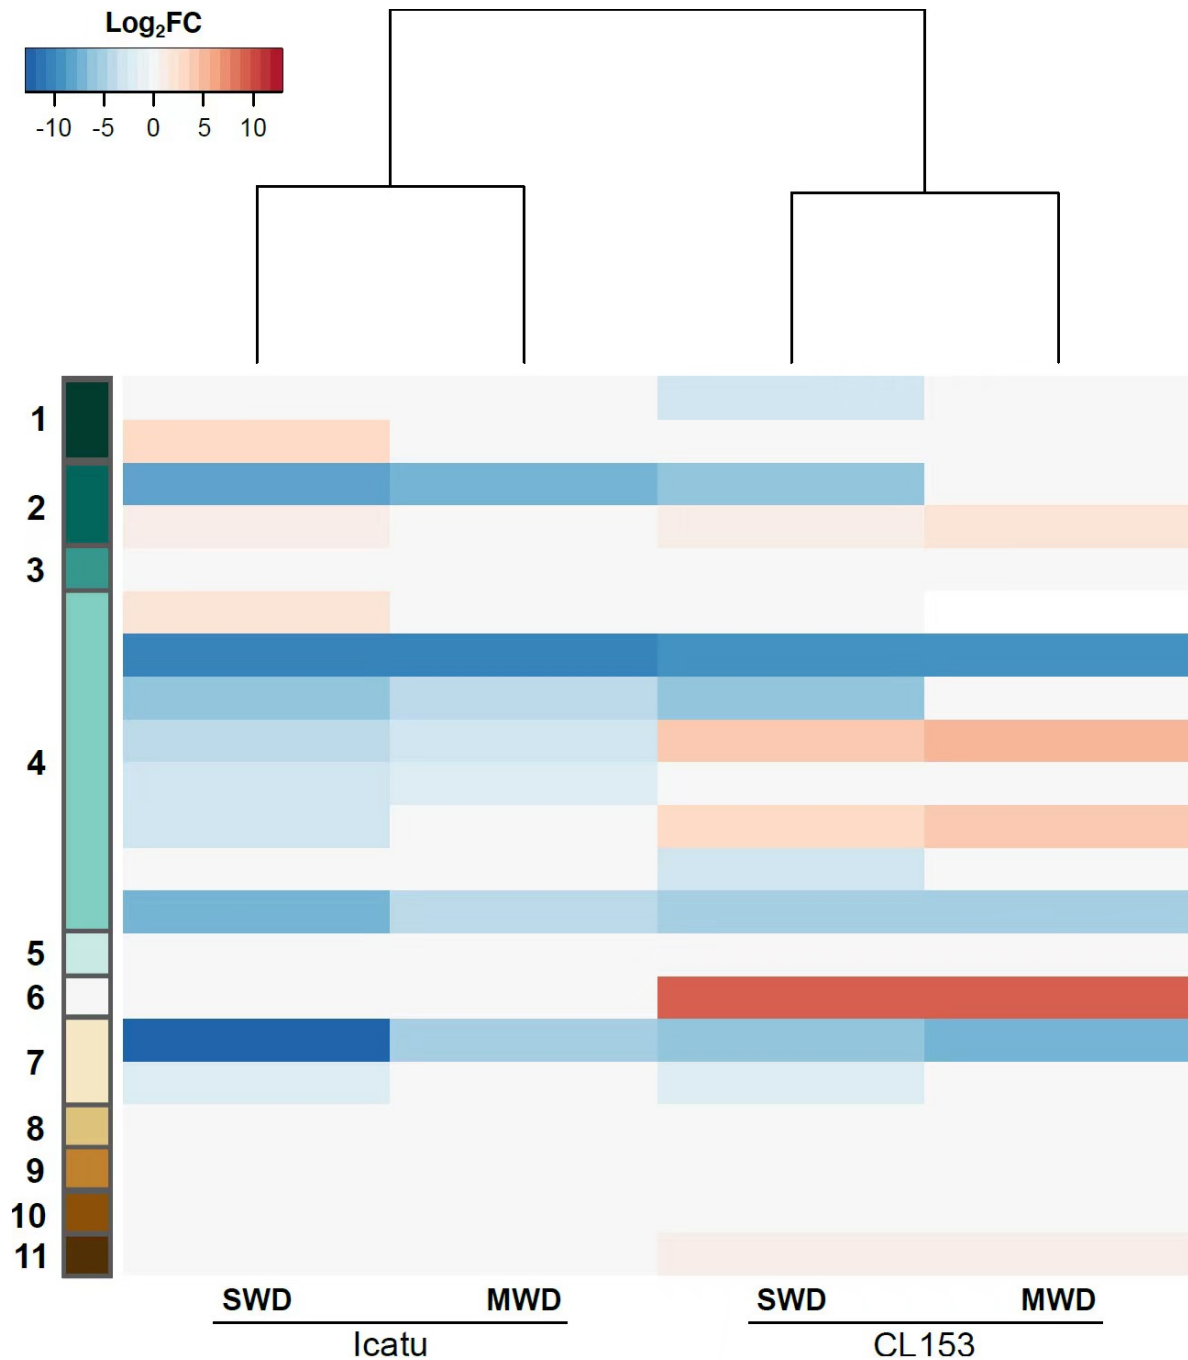

**Figure S3.** Clustered heat map and dendrogram of the differentially expressed genes (DEGs) associated with drought, in plants of *Coffea arabica* cv. Icatu (Icatu) and *C. canephora* cv. Conilon Clone CL153 (CL153) submitted to either moderate water deficit (MWD) or severe water deficit (SWD) in relation to well-watered (WW) plants. DEGs were selected if annotated with the Gene Ontology (GO) terms “response to water deprivation” (GO:0009414) and “response to desiccation” (GO:0009269). Hot colors represent up-regulated DEGs, and cold colors represent down-regulated DEGs. Numbers in the right column indicate the chromosome of the retrieved DEGs.
