# Supplementary material for: Understanding the Impact of Drought in Coffea Genotypes: Transcriptomic Analysis Supports a Common High Resilience to Moderate Water Deficit but a Genotype Dependent Sensitivity to Severe Water Deficit
Source: MDPI journal article supplement (doi:10.3390/agronomy11112255), 2021-11-08
Supplement: s1 [file s1 › Table_S2.pdf]

**Table S2.** Number of total expressed genes, total differentially expressed genes (DEGs) and GO annotated DEGs in *Coffea arabica* cv. Icatu (Icatu) and *C. canephora* cv. CL153 (CL153) plants submitted to three different water availability conditions: well-watered (WW), moderate water deficit (MWD) and severe water deficit (SWD). DEGs represent the number of significant genes found to be differently expressed between each water treatment and the control (respectively, MWD vs. WW and SWD vs. WW) selected by DESeq2 and filtered by log2 fold-change (FC)  $\neq 0$  and a false discovery rate (FDR)  $< 0.01$ .

| Expressed genes |    |              | All DEGs |     |      |      | GO annotated DEGs |     |      |
|-----------------|----|--------------|----------|-----|------|------|-------------------|-----|------|
|                 |    |              | TOTAL    | [%] | UP   | DOWN | TOTAL             | UP  | DOWN |
| CL153           | WW | MWD<br>20052 | 999      | 5%  | 417  | 582  | 720               | 296 | 424  |
|                 |    | SWD<br>20395 | 3373     | 17% | 1114 | 2259 | 2540              | 815 | 1725 |
| Icatu           | WW | MWD<br>20675 | 776      | 4%  | 155  | 621  | 589               | 116 | 473  |
|                 |    | SWD<br>20157 | 2055     | 10% | 518  | 1537 | 1551              | 369 | 1182 |
