# Supplementary material for: Understanding the Impact of Drought in Coffea Genotypes: Transcriptomic Analysis Supports a Common High Resilience to Moderate Water Deficit but a Genotype Dependent Sensitivity to Severe Water Deficit
Source: MDPI journal article supplement (doi:10.3390/agronomy11112255), 2021-11-08
Supplement: s1 [file s1 › Table_S3.xlsx]

## Sheet: Down-regulated
Gene ID	ORF Name	Uniprot acession	Protein Name	GO Terms	TAIR	Log2FC	FDR
Cc06_g08040	GSCOC_T00031181001	A0A068UQ53	Putative uncharacterized protein		AT4G12470	-12.3552170335459	1.98319923668194e-19
Cc05_g09310	GSCOC_T00002647001	A0A068VGC9	Putative uncharacterized protein		AT2G42840	-11.2410653494939	1.7630983414113e-13
Cc06_g01530	GSCOC_T00023375001	A0A068UDZ3	Glycerol-3-phosphate acyltransferase 6	GO:0016021;GO:0016746	AT2G38110	-10.5826961366537	2.75698750201756e-13
Cc07_g15190	GSCOC_T00036507001	A0A068TYS4	Putative BTB/POZ domain-containing protein DOT3		AT5G10250	-10.5091755736371	8.45406505304104e-13
Cc00_g29810	GSCOC_T00010430001	A0A068VM19	NAD(P)-binding Rossmann-fold superfamily protein		AT1G15950	-10.2221138931163	2.33693223320176e-05
Cc02_g09710	GSCOC_T00029619001	A0A068TUI1	TRICHOME BIREFRINGENCE-LIKE 36		AT3G54260	-10.0665558347306	2.17164982185678e-09
Cc11_g01760	GSCOC_T00019521001	A0A068UAY5	Protein of unknown function, DUF642			-9.76948426036425	2.19379678434566e-10
Cc04_g01940	GSCOC_T00021859001	A0A068TRB7	Protein HOTHEAD	GO:0050660;GO:0016614;GO:0007267;GO:0009553;GO:0010430	AT1G72970	-9.61295599943029	5.25864475697846e-10
Cc02_g16790	GSCOC_T00014174001	A0A068TKX6	Auxin-induced protein 15A	GO:0009733	AT4G34760	-9.59065840892352	9.45385517819289e-11
Cc07_g09010	GSCOC_T00040294001	A0A068U2S7	Putative unknown protein; BEST Arabidopsis thaliana protein match is			-9.32026202050131	4.40598241461955e-09
Cc11_g08860	GSCOC_T00032818001	A0A068TZH8	Putative uncharacterized protein	GO:0046872;GO:0030001	AT1G23000	-9.27900471393757	6.02821405478999e-09
Cc09_g03130	GSCOC_T00017586001	A0A068U6V0	GDSL esterase/lipase At5g33370	GO:0016788;GO:0042538;GO:0010226;GO:0009751	AT5G33370	-9.23812700080471	1.67750381272302e-08
Cc04_g07330	GSCOC_T00022544001	A0A068TQY3	Putative Protein ASPARTIC PROTEASE IN GUARD CELL 1	GO:0004190;GO:0009737;GO:0009414	AT3G18490	-9.12928276617932	8.79069963426976e-10
Cc06_g01620	GSCOC_T00023390001	A0A068UDD6	Laccase-4	GO:0048046;GO:0005507;GO:0052716;GO:0046274	AT2G38080	-9.01057926700208	5.16008475634768e-07
Cc07_g16350	GSCOC_T00037571001	A0A068UWH0	Putative Cytochrome P450 86B1	GO:0020037;GO:0005506;GO:0004497;GO:0016705	AT1G57750	-9.00049885524575	2.28276577497782e-08
Cc04_g01380	GSCOC_T00021788001	A0A068TP95	Putative myb domain protein 7	GO:0005634;GO:0003677	AT1G22640	-8.95812065002783	3.42372920509096e-07
Cc07_g13130	GSCOC_T00036783001	A0A068TZI6	Probable receptor protein kinase TMK1	GO:0016021;GO:0005886;GO:0005524;GO:0004675	AT1G66150	-8.95269449215243	1.70807199869117e-08
Cc11_g01930	GSCOC_T00019491001	A0A068U8I2	Ran BP2/NZF zinc finger-like superfamily protein	GO:0046872		-8.84749382862089	1.03507431910333e-06
Cc04_g03410	GSCOC_T00022035001	A0A068TP00	Putative uncharacterized protein			-8.81525286130072	1.71586739095428e-07
Cc06_g03690	GSCOC_T00023658001	A0A068UGI6	Putative Predicted protein			-8.59127170465873	2.05579850599757e-05
Cc02_g36340	GSCOC_T00003937001	A0A068VB76	Probable carboxylesterase 8	GO:0016787	AT2G45600	-8.5555693631261	6.31501050837778e-06
Cc00_g09440	GSCOC_T00008030001	A0A068VFN6	RHO guanyl-nucleotide exchange factor 14	GO:0005089;GO:0080092	AT1G31650	-8.54389477239975	2.00384687435547e-06
Cc02_g27550	GSCOC_T00025086001	A0A068UGS1	DNA-damage-repair/toleration protein DRT100		AT3G12610	-8.52612311683117	1.13458526875819e-05
Cc11_g16200	GSCOC_T00038155001	A0A068UYG3	Probable pectate lyase 5	GO:0046872;GO:0030570;GO:0045490	AT1G67750	-8.43318941286947	4.98378303267775e-06
Cc08_g04480	GSCOC_T00015634001	A0A068V4K1	Anthocyanin regulatory C1 protein	GO:0005634;GO:0003677	AT2G16720	-8.39942466586006	2.33693223320176e-05
Cc02_g10710	GSCOC_T00029500001	A0A068TU94	Putative Protein of unknown function (DUF1635)			-8.39238235959407	4.96308962694131e-06
Cc09_g01950	GSCOC_T00017742001	A0A068U9T4	Putative Cytochrome P450 77A3	GO:0005886;GO:0020037;GO:0005506;GO:0004497;GO:0016705	AT5G04660	-8.39215693155661	1.32357810251262e-05
Cc01_g10980	GSCOC_T00024214001	A0A068UHI1	Uncharacterized membrane protein At1g06890	GO:0016021	AT2G28315	-8.34899993781006	0.000108660094207252
Cc06_g12590	GSCOC_T00041519001	A0A068U4G1	Putative 21 kDa protein	GO:0004857	AT5G20740	-8.29296228346495	5.14841880985187e-06
Cc03_g10700	GSCOC_T00041994001	A0A068V432	Probably inactive leucine-rich repeat receptor-like protein kinase At3g28040	GO:0016021;GO:0005524;GO:0004672	AT3G28040	-8.28497127382391	2.53626365668198e-23
Cc01_g05920	GSCOC_T00027420001	A0A068UJT1	Protein GAST1		AT1G74670	-8.27055903889811	3.30832941800454e-12
Cc00_g23340	GSCOC_T00012065001	A0A068VJU3	Putative O-acyltransferase (WSD1-like) family protein	GO:0004144;GO:0045017		-8.21430775722856	0.000178336504821885
Cc11_g10950	GSCOC_T00032505001	A0A068TX76	Hypothetical protein			-8.20150157104643	6.54518788389596e-05
Cc03_g15230	GSCOC_T00026792001	A0A068UHX6	Probable leucine-rich repeat receptor-like protein kinase At5g49770	GO:0016021;GO:0005524;GO:0004674	AT5G49770	-8.16609974233456	1.79191098810278e-06
Cc06_g18640	GSCOC_T00040488001	A0A068V166	Putative methyltransferase DDB_G0268948	GO:0008168		-8.16002150662732	0.00100019708292569
Cc02_g16370	GSCOC_T00014121001	A0A068TNJ5	Thaumatin-like protein	GO:0016021	AT1G75040	-8.13989946418154	1.24294630020518e-05
Cc05_g10420	GSCOC_T00021444001	A0A068UCU0	Putative Predicted protein			-8.13086798451396	0.000124434602260374
Cc10_g03730	GSCOC_T00024910001	A0A068UJ00	Lysine histidine transporter-like 8	GO:0016021		-8.11079749610929	0.000107537234056992
Cc06_g10710	GSCOC_T00041744001	A0A068U4M8	Leucine-rich repeat (LRR) family protein	GO:0016021		-8.08080947335897	7.05074264569256e-05
Cc04_g02630	GSCOC_T00021938001	A0A068TPL2	Putative downstream target of AGL15-4	GO:0016021		-8.03517085752849	1.7656481369124e-06
Cc06_g22200	GSCOC_T00017165001	A0A068V6F6	Phospholipase A2-alpha	GO:0005576;GO:0005794;GO:0005509;GO:0004623;GO:0050482;GO:0016042;GO:0006644		-8.02179295639165	0.000181905177080646
Cc10_g15980	GSCOC_T00033803001	A0A068UTD0	Endoglucanase 9	GO:0008810;GO:0030245		-8.01804707853246	0.00815144925222983
Cc10_g11960	GSCOC_T00031875001	A0A068URH7	unknown protein; FUNCTIONS IN			-7.98991694455402	5.62313889515961e-05
Cc11_g11470	GSCOC_T00032442001	A0A068TWP8	Putative DNA-3-methyladenine glycosylase	GO:0008725;GO:0006284		-7.98342096665072	0.000406655926663947
Cc03_g01550	GSCOC_T00025770001	A0A068TRH6	unknown protein; BEST Arabidopsis thaliana protein match is			-7.95654307621354	3.64638727079211e-05
Cc01_g04940	GSCOC_T00028571001	A0A068ULG5	ABC transporter G family member 15	GO:0016021;GO:0005524;GO:0016887	AT3G21090	-7.94372273530826	3.28748034017499e-05
Cc01_g14490	GSCOC_T00028448001	A0A068ULS7	Putative FUNCTIONS IN	GO:0009941	AT3G25690	-7.93288366566896	1.77908512634558e-05
Cc10_g02450	GSCOC_T00024747001	A0A068UFY0	Putative Transmembrane protein 136	GO:0016021		-7.92862311785866	0.000293014058780924
Cc01_g04350	GSCOC_T00004456001	A0A068VA16	LOB domain-containing protein 4		AT1G31320	-7.92521470417373	9.00722600434673e-05
Cc02_g19540	GSCOC_T00014522001	A0A068TLR5	Hypothetical protein			-7.90117071802379	3.23519988389e-06
Cc10_g15770	GSCOC_T00033771001	A0A068UV32	Putative Protein ASPARTIC PROTEASE IN GUARD CELL 1	GO:0004190;GO:0043067	AT1G09750	-7.87814529778641	0.000140397736947779
Cc00_g34890	GSCOC_T00011347001	A0A068VR24	MATE efflux family protein		AT3G21690	-7.86693287334446	0.000167455044726133
Cc10_g14210	GSCOC_T00012011001	A0A068VCI7	LRR receptor-like serine/threonine-protein kinase RCH1	GO:0016021;GO:0005524;GO:0004672	AT5G48940	-7.84011979376262	2.16711354670318e-11
Cc11_g12980	GSCOC_T00032242001	A0A068TVR3	Putative Vacuolar amino acid transporter 1	GO:0016021		-7.83681092999957	5.75382380003165e-05
Cc08_g15930	GSCOC_T00035539001	A0A068UWY9	Putative uncharacterized protein		AT2G19170	-7.81987071671577	1.54509432101412e-05
Cc02_g06220	GSCOC_T00039148001	A0A068UZZ2	Putative Omega-hydroxypalmitate O-feruloyl transferase	GO:0016747		-7.759815207018	0.00118029536955597
Cc02_g03700	GSCOC_T00020263001	A0A068U9Y2	Subtilisin-like protease	GO:0004252	AT5G51750	-7.73964178671376	0.000283043036692956
Cc03_g07650	GSCOC_T00026622001	A0A068TT55	Hypothetical protein	GO:0016021		-7.73268972161616	0.000431029239123834
Cc02_g16190	GSCOC_T00014097001	A0A068TKS3	GDSL esterase/lipase At1g29670	GO:0016788		-7.72275533980012	0.00431096014835874
Cc11_g04910	GSCOC_T00042937001	A0A068V3C2	Probable pectinesterase/pectinesterase inhibitor 40	GO:0045330;GO:0004857;GO:0030599;GO:0042545;GO:0045490	AT4G02320	-7.72020574426621	1.95368145011648e-05
Cc11_g08160	GSCOC_T00032913001	A0A068TZM6	Endoglucanase 8	GO:0008810;GO:0030245		-7.66987806216652	0.000347169847707984
Cc11_g13960	GSCOC_T00032120001	A0A068TY27	Putative ARM repeat superfamily protein	GO:0005874;GO:0008017	AT1G27210	-7.66063753248992	9.61835401218413e-05
Cc00_g22140	GSCOC_T00005697001	A0A068VJU5	Putative Proteinase inhibitor I20, Pin2	GO:0004867		-7.63030781175566	0.000237445831247048
Cc05_g10250	GSCOC_T00021480001	A0A068UD36	Polyphenol oxidase, chloroplastic	GO:0004097;GO:0046872;GO:0046148		-7.62347533328816	3.68294410678512e-20
Cc00_g22640	GSCOC_T00008883001	A0A068VJL3	Indole-3-acetic acid-induced protein ARG7	GO:0009733	AT5G18050	-7.61120902713244	0.000404588746930732
Cc02_g09600	GSCOC_T00029636001	A0A068TV37	Putative FUNCTIONS IN			-7.59896671304919	0.00166051166874552
Cc10_g14430	GSCOC_T00006176001	A0A068VFY4	Cupredoxin superfamily protein			-7.54025678831247	1.75016421306284e-05
Cc06_g03600	GSCOC_T00023646001	A0A068UEW8	Probable beta-1,4-xylosyltransferase IRX9	GO:0000139;GO:0016021;GO:0015018;GO:0042285;GO:0071555;GO:0010417;GO:0009834		-7.52698659779505	0.00596074348001213
Cc06_g08330	GSCOC_T00031146001	A0A068US15	Putative Equilibrative nucleoside transporter 3	GO:0016021;GO:0005337		-7.50614710494714	0.000512624386211189
Cc10_g06580	GSCOC_T00034636001	A0A068U0I7	Putative Transcription factor bHLH96	GO:0046983	AT1G72210	-7.50431970871182	0.000377240828329351
Cc11_g04780	GSCOC_T00042910001	A0A068V3X6	SAUR-like auxin-responsive protein family	GO:0009733		-7.47292852775739	0.000627004157646179
Cc02_g09150	GSCOC_T00029696001	A0A068TV77	GDSL esterase/lipase At5g33370	GO:0016788		-7.46689205003628	0.00151316106280002
Cc00_g26240	GSCOC_T00012616001	A0A068VL28	Putative Probable peptide transporter At1g52190	GO:0016021;GO:0022857	AT1G52190	-7.45684594518664	1.23694772438623e-09
Cc03_g03710	GSCOC_T00026070001	A0A068TSM9	Putative uncharacterized protein			-7.4006336613143	0.00649058922972471
Cc06_g23480	GSCOC_T00040562001	A0A068V1A4	Hypothetical protein			-7.39652631348412	0.00147441469386309
Cc11_g15510	GSCOC_T00038065001	A0A068UXH6	Protein of Unknown Function (DUF239)			-7.35847952780545	0.000907800871158655
Cc11_g14380	GSCOC_T00032065001	A0A068TVF1	Putative Auxin-induced protein 5NG4	GO:0016021;GO:0022857		-7.34845312970902	0.00133658561410527
Cc04_g04910	GSCOC_T00022230001	A0A068TPJ9	Putative DeSI-like protein At4g17486			-7.32689998651689	0.00035856832233322
Cc05_g06730	GSCOC_T00042182001	A0A068V293	Putative uncharacterized protein			-7.32026813412936	6.61322205717826e-17
Cc03_g01290	GSCOC_T00025735001	A0A068TR76	Major allergen Pru ar 1	GO:0010427;GO:0004864;GO:0038023;GO:0009738;GO:0006952	AT1G24020	-7.23293809419433	5.78699969890914e-10
Cc06_g05070	GSCOC_T00043039001	A0A068V3H6	Putative Cytochrome P450 76A2	GO:0016021;GO:0020037;GO:0005506;GO:0004497;GO:0016705		-7.23276520096597	0.00462074237226454
Cc05_g07530	GSCOC_T00042284001	A0A068V2E6	Putative Extracellular ribonuclease LE	GO:0033897;GO:0003723		-7.21316268944754	0.00151960614458412
Cc00_g24520	GSCOC_T00012254001	A0A068VKH7	Putative Cyclin-D3-2	GO:0042025		-7.16672534560632	0.00222455950651471
Cc02_g12140	GSCOC_T00029328001	A0A068TWE8	Calcium-binding protein PBP1	GO:0005509		-7.11713400155109	0.00453855646032706
Cc00_g33290	GSCOC_T00010540001	A0A068VN14	Putative Bifunctional dihydroflavonol 4-reductase/flavanone 4-reductase		AT1G15950	-7.07063232042405	0.00105525044077107
Cc01_g08910	GSCOC_T00023929001	A0A068UEI3	Putative Pollen Ole e 1 allergen and extensin family protein			-7.04587903355292	2.13384508134902e-12
Cc04_g15510	GSCOC_T00042323001	A0A068V2X1	Hypothetical protein			-7.03860732047317	0.00137482599817627
Cc11_g10730	GSCOC_T00032540001	A0A068TWC4	Probable transmembrane ascorbate ferrireductase 4	GO:0016021;GO:0016491		-7.03482082836909	0.00348079197258827
Cc00_g35110	GSCOC_T00008391001	A0A068VNF3	Putative Leucine-rich repeat receptor-like protein kinase PXL2	GO:0016021		-7.02346462211319	0.00599603228937097
Cc02_g14630	GSCOC_T00013881001	A0A068TLG8	Putative FUNCTIONS IN	GO:0008017;GO:0043622;GO:0048446		-7.0082580389459	0.00431096014835874
Cc00_g17790	GSCOC_T00004701001	A0A068VIG6	Hypothetical protein			-6.97594232423474	4.51006832552453e-15
Cc04_g02380	GSCOC_T00021909001	A0A068TPI1	GDSL esterase/lipase APG	GO:0016788	AT3G16370	-6.97242926062266	2.53626365668198e-23
Cc07_g07560	GSCOC_T00040106001	A0A068U2B1	Probable xyloglucan endotransglucosylase/hydrolase protein 6	GO:0048046;GO:0005618;GO:0016021;GO:0004553;GO:0016762;GO:0042546;GO:0071555;GO:0009414;GO:0010411	AT5G65730	-6.93721361176572	0.000621683395553387
Cc03_g06860	GSCOC_T00026510001	A0A068TTJ1	Auxin-responsive family protein	GO:0016021;GO:0046872;GO:0055114		-6.92256659195269	0.000992213368796367
Cc10_g02940	GSCOC_T00024808001	A0A068UH38	Putative uncharacterized protein			-6.92249418341454	0.0050688073549586
Cc02_g27560	GSCOC_T00025087001	A0A068UH28	Putative Protein gamma response 1	GO:0006974;GO:0007276;GO:0010212		-6.92198457275963	0.00618184556125686
Cc09_g04130	GSCOC_T00017463001	A0A068U6H9	unknown protein; BEST Arabidopsis thaliana protein match is	GO:0016021		-6.84691460110382	0.00233916371527843
Cc11_g16640	GSCOC_T00038205001	A0A068V0B0	Remorin family protein	GO:0005634		-6.76406170304104	0.000971477442046042
Cc08_g00740	GSCOC_T00038473001	A0A068UZ34	Ethylene-responsive transcription factor SHINE 3	GO:0005634;GO:0003677;GO:0003700	AT5G25390	-6.72666858709073	6.41286821245384e-09
Cc08_g14880	GSCOC_T00035399001	A0A068UWM4	Cytochrome P450 86A2	GO:0020037;GO:0005506;GO:0004497;GO:0016705	AT4G00360	-6.65445483879774	9.55977758826761e-15
Cc08_g07750	GSCOC_T00011866001	A0A068VDV8	Hypothetical protein			-6.65102716940103	0.000117872114726141
Cc02_g39760	GSCOC_T00027671001	A0A068UM06	Putative Uncharacterized protein			-6.59785883088875	0.00222381150137651
Cc06_g07020	GSCOC_T00031314001	A0A068UQL0	Probable carboxylesterase 15	GO:0016787	AT5G06570	-6.5671447524982	8.5236855177685e-08
Cc08_g07000	GSCOC_T00025292001	A0A068UHB0	BTB/POZ domain-containing protein NPY1	GO:0060918;GO:0099402	AT4G31820	-6.55467079194937	0.000387091661983894
Cc01_g19340	GSCOC_T00016071001	A0A068U5S9	Putative ovate family protein 16	GO:0005634;GO:0045892	AT4G14860	-6.53910781357384	0.000302115439742026
Cc06_g23640	GSCOC_T00040543001	A0A068V317	Copper ion binding protein, putative	GO:0046872;GO:0030001		-6.40846494436069	0.00324615484475778
Cc00_g15670	GSCOC_T00008808001	A0A068VH45	Putative Omega-hydroxypalmitate O-feruloyl transferase	GO:0005737;GO:0005634;GO:0016747;GO:0009567		-6.40332096059412	1.10764177361727e-13
Cc00_g06630	GSCOC_T00007484001	A0A068VGS6	Putative Bifunctional dihydroflavonol 4-reductase/flavanone 4-reductase	GO:0003824	AT4G35420	-6.38002788376644	5.30829967369157e-11
Cc00_g15680	GSCOC_T00011279001	A0A068VHF5	Putative disease resistance protein RGA4	GO:0043531		-6.37484215881472	0.000274127008775019
Cc02_g23990	GSCOC_T00015105001	A0A068TN17	Putative Leucine-rich repeat receptor protein kinase EXS	GO:0016021;GO:0005524;GO:0004672		-6.32792872702261	0.00424497873642738
Cc02_g19900	GSCOC_T00014569001	A0A068TM56	Pollen-specific protein SF3	GO:0046872	AT1G10200	-6.24669963791263	5.45836399500655e-09
Cc11_g04790	GSCOC_T00042911001	A0A068V5X5	Auxin-induced protein 15A	GO:0009733	AT5G18050	-6.20991943250723	1.11191183382583e-05
Cc01_g18220	GSCOC_T00016231001	A0A068U6G4	NAC domain protein, IPR003441	GO:0005634;GO:0003677;GO:0006355		-6.20905788668738	0.00762275230842692
Cc02_g00220	GSCOC_T00019798001	A0A068UBA4	Syntaxin-22	GO:0016021;GO:0005770;GO:0030140;GO:0005484;GO:0045324;GO:0006623	AT5G46860	-6.18153169442874	7.72084919042398e-17
Cc02_g27820	GSCOC_T00025132001	A0A068UHM2	WIP domain protein 5			-6.11263701834417	0.00929723866530612
Cc03_g15180	GSCOC_T00026781001	A0A068UHX0	Cytochrome P450 71A2	GO:0016021;GO:0020037;GO:0005506;GO:0016705	AT3G48270	-6.06219510861517	1.06685969914865e-08
Cc01_g15270	GSCOC_T00016583001	A0A068U789	Expansin-A2	GO:0005618;GO:0005576;GO:0016020;GO:0009664	AT2G40610	-6.05650338534958	1.17405640404675e-09
Cc02_g24840	GSCOC_T00028834001	A0A068UMH9	myb-like HTH transcriptional regulator family protein	GO:0048555;GO:0003700;GO:0043565;GO:0044839;GO:0055047;GO:0048235;GO:0045893		-6.05021131348583	0.00215492349133056
Cc00_g07930	GSCOC_T00006635001	A0A068VHR5	Protein of unknown function, DUF642			-5.98300427902299	0.00975606114855798
Cc02_g09480	GSCOC_T00029651001	A0A068TVC0	Putative Double Clp-N motif-containing P-loop nucleoside triphosphate hydrolases superfamily protein		AT3G52490	-5.94851509954432	0.000126401410793287
Cc06_g12080	GSCOC_T00041578001	A0A068U3G1	Auxin-binding protein ABP20	GO:0048046;GO:0005618;GO:0030145;GO:0045735	AT5G20630	-5.89648929281539	1.20036306269483e-22
Cc11_g12830	GSCOC_T00032263001	A0A068TVS4	Expansin-A1	GO:0005618;GO:0005576;GO:0016021;GO:0009664	AT2G03090	-5.81062656866871	3.37437810474313e-25
Cc05_g02500	GSCOC_T00020945001	A0A068UDN1	GDSL esterase/lipase At2g04570	GO:0016788	AT2G04570	-5.75608910626085	1.97638041947453e-08
Cc04_g15520	GSCOC_T00042324001	A0A068V237	Putative Mitochondrial outer membrane protein porin of 36 kDa	GO:0005741;GO:0008308		-5.74830494853121	1.6658215109239e-08
Cc02_g05420	GSCOC_T00039050001	A0A068UZQ6	Expansin-A4	GO:0005618;GO:0005576;GO:0016020;GO:0009664	AT2G40610	-5.72848824096669	5.45836399500655e-09
Cc04_g10190	GSCOC_T00042560001	A0A068V2Y8	Hypothetical protein			-5.71791766385451	8.80634049019887e-05
Cc08_g01750	GSCOC_T00038339001	A0A068V0J5	Cytochrome c oxidase subunit 6b-3	GO:0005739	AT4G28060	-5.70633210321898	0.00102635623305258
Cc06_g01950	GSCOC_T00023434001	A0A068UEB7	Putative uncharacterized protein			-5.68380622203687	3.35801604637949e-09
Cc01_g14170	GSCOC_T00028412001	A0A068UL12	Vacuolar cation/proton exchanger 1	GO:0016021;GO:0005774;GO:0015369	AT3G51860	-5.67345643860669	2.81326519476182e-10
Cc10_g02800	GSCOC_T00024789001	A0A068UG09	RAD-like 1	GO:0005634;GO:0003677	AT4G39250	-5.67102911350382	0.00191833430521869
Cc00_g14020	GSCOC_T00010024001	A0A068VH99	3-ketoacyl-CoA synthase 21	GO:0016021;GO:0016747;GO:0006633	AT5G04530	-5.65607499362204	7.9344183794307e-08
Cc01_g17250	GSCOC_T00016348001	A0A068U5T5	Putative uncharacterized protein			-5.65332240709999	6.62423254237173e-10
Cc02_g09850	GSCOC_T00029601001	A0A068TV18	Putative Major facilitator superfamily protein	GO:0016021;GO:0022857		-5.63032287672807	1.10424676425447e-09
Cc11_g10910	GSCOC_T00032513001	A0A068TYV8	Phosphate transporter PHO1 homolog 1	GO:0016021	AT1G68740	-5.58013158355144	0.00616661563899738
Cc00_g02690	GSCOC_T00006658001	A0A068VDI7	Putative Subtilisin-like protease	GO:0016021;GO:0004252		-5.50851790634659	0.00119189196938299
Cc06_g09860	GSCOC_T00041858001	A0A068U4U2	Rho guanine nucleotide exchange factor 8	GO:0005089	AT3G24620	-5.49437292489039	0.00454318397722485
Cc06_g08150	GSCOC_T00031166001	A0A068UPS4	Putative Auxin-responsive protein IAA29	GO:0005634;GO:0009734;GO:0006355	AT1G04550	-5.42107878640146	0.00227294588698253
Cc10_g15400	GSCOC_T00033719001	A0A068USP4	Purine permease 3	GO:0016021;GO:0015211	AT1G28220	-5.38676516929156	2.63013621465156e-08
Cc02_g21770	GSCOC_T00014823001	A0A068TQ32	Putative uncharacterized protein	GO:0046872;GO:0030001	AT5G02600	-5.38570391237328	1.20628369001598e-05
Cc04_g08320	GSCOC_T00022688001	A0A068TQL0	Putative Subtilisin-like protease	GO:0004252	AT4G30020	-5.35769695435458	8.69091943831951e-06
Cc07_g04510	GSCOC_T00039707001	A0A068U1G0	Hypothetical protein			-5.34537569912247	2.81796122086846e-10
Cc02_g09840	GSCOC_T00029602001	A0A068TX02	Putative Major facilitator superfamily protein	GO:0016021;GO:0022857		-5.32494870665469	3.90239673636901e-05
Cc00_g06620	GSCOC_T00007483001	A0A068VE82	Putative uncharacterized protein	GO:0003824	AT4G35420	-5.28279115719986	1.17405640404675e-09
Cc08_g02380	GSCOC_T00037709001	A0A068UXF3	Ent-kaurenoic acid oxidase 2	GO:0016021;GO:0020037;GO:0005506;GO:0004497;GO:0016705	AT2G32440	-5.26724733328029	9.30599242769891e-10
Cc01_g16260	GSCOC_T00016463001	A0A068U5W6	Hypothetical protein			-5.21425271771583	0.00106788099489179
Cc11_g10190	GSCOC_T00032610001	A0A068TWD9	3-ketoacyl-CoA synthase 6	GO:0016021;GO:0016747;GO:0006633	AT1G68530	-5.17762372779023	4.52183116196509e-15
Cc04_g16340	GSCOC_T00035723001	A0A068UVF9	Expansin-A15	GO:0005618;GO:0005576;GO:0016020;GO:0009664	AT2G03090	-5.16355550456473	3.16129454848703e-06
Cc11_g15290	GSCOC_T00038039001	A0A068V022	Putative Polygalacturonase At1g48100	GO:0005576;GO:0004650;GO:0005975;GO:0071555	AT1G48100	-5.1549709614106	0.00409397470268757
Cc04_g03570	GSCOC_T00022052001	A0A068TP97	F-box/kelch-repeat protein At1g80440		AT1G80440	-5.15062052351471	0.00136104072666952
Cc02_g23880	GSCOC_T00015092001	A0A068TP59	ABC transporter G family member 11	GO:0016021;GO:0005524;GO:0016887	AT1G17840	-5.14450926699262	0.000431349230966506
Cc05_g02850	GSCOC_T00020872001	A0A068UDK5	Putative Glucan endo-1,3-beta-glucosidase 3	GO:0004553;GO:0005975	AT2G01630	-5.13048260332492	3.73827906490017e-18
Cc01_g17230	GSCOC_T00016350001	A0A068U8B5	Tetratricopeptide repeat (TPR)-like superfamily protein	GO:0010438;GO:0010439;GO:0006792	AT5G48850	-5.12981324529184	0.000282685850056305
Cc10_g11120	GSCOC_T00016685001	A0A068V4X1	Auxin transporter-like protein 5	GO:0016021	AT1G77690	-5.12418239051102	0.00557448918920877
Cc02_g16500	GSCOC_T00014143001	A0A068TL45	Hypothetical protein		AT4G38770	-5.08723368254463	3.92694456217349e-06
Cc00_g22520	GSCOC_T00000523001	A0A068VJX9	Probable indole-3-acetic acid-amido synthetase GH3.1		AT2G14960	-5.08165608657414	1.91013156939691e-06
Cc04_g09640	GSCOC_T00008123001	A0A068VIW8	Protein ASPARTIC PROTEASE IN GUARD CELL 1	GO:0004190;GO:0009737;GO:0009414	AT3G18490	-5.0000982453527	5.36690348810839e-12
Cc03_g07230	GSCOC_T00026566001	A0A068TTV1	Probable pectate lyase 15	GO:0016021;GO:0046872;GO:0030570;GO:0045490	AT4G13710	-4.98252991453318	0.00431936642001141
Cc02_g03720	GSCOC_T00020265001	A0A068UCC3	Alpha-L-fucosidase 1	GO:0004560;GO:0006004	AT2G28100	-4.89896683051957	0.00242640882449348
Cc05_g14120	GSCOC_T00038859001	A0A068UZY1	Putative uncharacterized protein	GO:0016021		-4.89260428265797	2.81796122086846e-10
Cc11_g14930	GSCOC_T00001041001	A0A068VH36	Probable peptide/nitrate transporter At5g13400	GO:0016021;GO:0022857;GO:0006857	AT5G13400	-4.86551986848317	1.01659817472076e-15
Cc05_g07600	GSCOC_T00016754001	A0A068V5Q9	Tyrosine aminotransferase	GO:0030170;GO:0008483;GO:0009058;GO:0006520	AT5G36160	-4.84542127778721	0.00723867133848391
Cc02_g13480	GSCOC_T00029145001	A0A068TU88	Putative arabinogalactan protein 30		AT2G33790	-4.84249311609601	0.00149187146541661
Cc02_g16640	GSCOC_T00014157001	A0A068TKW3	Putative Aquaporin PIP-type	GO:0016021;GO:0015267		-4.84187930554576	7.10142740595306e-08
Cc06_g04770	GSCOC_T00043000001	A0A068V3F5	Putative PLATZ transcription factor family protein			-4.84138131317889	0.00471716206059326
Cc06_g17450	GSCOC_T00036396001	A0A068UWM8	Putative Double Clp-N motif-containing P-loop nucleoside triphosphate hydrolases superfamily protein		AT4G29920	-4.8279330063957	4.35687975862076e-16
Cc07_g13530	GSCOC_T00036725001	A0A068TZD5	Protein RSI-1		AT1G74670	-4.8205370012954	0.00375657566463157
Cc08_g16380	GSCOC_T00035596001	A0A068UX71	Putative Protein ABIL3		AT5G24310	-4.78818143121449	5.24360158740491e-12
Cc01_g11410	GSCOC_T00024270001	A0A068UF77	Auxin response factor 4	GO:0005634;GO:0003677;GO:0009734;GO:0006355	AT5G60450	-4.78699025243825	3.30832941800454e-12
Cc06_g06470	GSCOC_T00031379001	A0A068UQS8	Putative uncharacterized protein	GO:0016021		-4.77572472828196	1.78168881872675e-06
Cc01_g17620	GSCOC_T00016300001	A0A068U6L0	Receptor-like serine/threonine-protein kinase ALE2	GO:0016021;GO:0005886;GO:0005524;GO:0004674;GO:0042335;GO:1905393;GO:0046777;GO:0010068	AT2G20300	-4.76794606563855	0.00402379752062306
Cc02_g11660	GSCOC_T00029384001	A0A068TU18	Probable xyloglucan endotransglucosylase/hydrolase protein 8	GO:0048046;GO:0005618;GO:0004553;GO:0016762;GO:0042546;GO:0071555;GO:0010411	AT1G11545	-4.76432136893231	2.03914209949703e-08
Cc07_g10480	GSCOC_T00037111001	A0A068U084	Lactoylglutathione lyase / glyoxalase I family protein	GO:0004462;GO:0046872		-4.73825676582182	4.69577277764278e-06
Cc00_g13630	GSCOC_T00009320001	A0A068VH58	Hypothetical protein			-4.72915376728644	2.65827201926529e-05
Cc08_g03030	GSCOC_T00037810001	A0A068UXM2	ABC transporter B family member 2	GO:0016021;GO:0005524;GO:0016887;GO:0042626	AT4G25960	-4.7081358195218	2.3260239933183e-05
Cc05_g10790	GSCOC_T00021397001	A0A068UBV6	TRICHOME BIREFRINGENCE-LIKE 41		AT3G14850	-4.70523148012277	0.000265834769241168
Cc10_g01720	GSCOC_T00024658001	A0A068UGI9	Hexokinase-2, chloroplastic	GO:0005524;GO:0005536;GO:0004396;GO:0001678;GO:0006096		-4.68338196712405	0.00868219685170125
Cc07_g06320	GSCOC_T00039933001	A0A068U2H8	Hypothetical protein	GO:0016021	AT4G06744	-4.67745961787504	1.45004675046574e-15
Cc10_g04890	GSCOC_T00034880001	A0A068TZ21	Putative Cyclin-D3-2	GO:0042025	AT4G34160	-4.66919455900343	0.000992424739210447
Cc11_g10580	GSCOC_T00032559001	A0A068TWE1	Probable galacturonosyltransferase-like 3	GO:0016757	AT1G13250	-4.64956041311555	0.00321698140093674
Cc01_g18690	GSCOC_T00016169001	A0A068U615	P-loop containing nucleoside triphosphate hydrolases superfamily protein	GO:0005524;GO:0016301		-4.6454966796725	8.82090688161132e-05
Cc00_g26150	GSCOC_T00004175001	A0A068VKF5	Putative BURP domain-containing protein 5		AT5G25610	-4.64402898640896	0.00595679349244106
Cc02_g35040	GSCOC_T00011816001	A0A068VCG1	Nicotianamine synthase	GO:0030410;GO:0030418	AT1G09240	-4.63590388026303	6.61516159872437e-09
Cc02_g16340	GSCOC_T00014117001	A0A068TKT6	Major facilitator superfamily protein	GO:0016021		-4.62283957811767	9.45385517819289e-11
Cc08_g02370	GSCOC_T00037708001	A0A068UX32	Putative Deacetylvindoline O-acetyltransferase	GO:0016747		-4.59307673350143	5.62401344388083e-05
Cc08_g01760	GSCOC_T00038338001	A0A068UYL6	Putative invertase inhibitor	GO:0004857		-4.58119920070274	5.64876701939462e-05
Cc08_g12940	GSCOC_T00030408001	A0A068UN00	Monocopper oxidase-like protein SKU5	GO:0046658;GO:0048046;GO:0009505;GO:0009506;GO:0005774;GO:0005507;GO:0016491;GO:0009932	AT4G12420	-4.57748436374516	1.97197844230778e-06
Cc09_g08340	GSCOC_T00020786001	A0A068UAW4	Putative Heavy metal transport/detoxification superfamily protein	GO:0046872;GO:0030001		-4.57649238190638	0.00186374595472248
Cc07_g02470	GSCOC_T00039442001	A0A068U1H3	Putative Auxin-induced protein 5NG4	GO:0016021;GO:0022857	AT3G28050	-4.56649165016659	1.19028564542391e-09
Cc02_g39700	GSCOC_T00027679001	A0A068UK98	Calcium-transporting ATPase, endoplasmic reticulum-type	GO:0016021;GO:0005524	AT4G00900	-4.54317378975265	6.77211459548763e-06
Cc08_g08820	GSCOC_T00017214001	A0A068V6I5	Putative BURP domain-containing protein 5		AT5G25610	-4.52515189746238	5.70656853857069e-11
Cc08_g04660	GSCOC_T00004723001	A0A068VHH1	Putative Cytosolic sulfotransferase 15	GO:0008146	AT5G07010	-4.52206346913067	4.7397759917217e-09
Cc06_g20360	GSCOC_T00022963001	A0A068UCI3	Bifunctional inhibitor/lipid-transfer protein/seed storage 2S albumin superfamily protein		AT4G12470	-4.51448177027777	0.000283788840323921
Cc02_g29030	GSCOC_T00011530001	A0A068VF11	Putative Bifunctional dihydroflavonol 4-reductase/flavanone 4-reductase	GO:0003824	AT1G15950	-4.4963217803298	1.21352524455926e-12
Cc02_g36020	GSCOC_T00042760001	A0A068V2Z8	Putative Probable peptide/nitrate transporter At1g59740	GO:0016021;GO:0022857	AT1G59740	-4.49247399569876	0.000595591639715301
Cc10_g12560	GSCOC_T00031972001	A0A068URN5	Probable peptide/nitrate transporter At5g62680	GO:0016021;GO:0022857	AT5G62680	-4.47038265101622	1.02421741355259e-06
Cc04_g12440	GSCOC_T00005304001	A0A068V8F9	Protein of Unknown Function (DUF239)			-4.40734695150486	0.000102761035935409
Cc01_g08480	GSCOC_T00006217001	A0A068VJI6	Putative Aspartic proteinase nepenthesin-1	GO:0004190		-4.39782385834695	5.06019231516514e-06
Cc01_g19080	GSCOC_T00016105001	A0A068U7S8	Putative Chlorophyllase-1	GO:0047746;GO:0015996	AT1G19670	-4.39271836998718	8.41315126204159e-05
Cc06_g19740	GSCOC_T00029048001	A0A068UPR9	Putative Disease resistance protein At4g27190	GO:0043531		-4.37577570557701	0.00150096124856287
Cc06_g08340	GSCOC_T00031144001	A0A068UQ26	Putative Tetratricopeptide repeat (TPR)-like superfamily protein			-4.34139992007381	0.000116282861882545
Cc06_g13600	GSCOC_T00041373001	A0A068U5P9	Putative Pathogenesis-related protein PRMS	GO:0005576	AT2G14610	-4.34126338650446	0.00104950040503491
Cc08_g11520	GSCOC_T00027156001	A0A068UIQ2	Putative HXXXD-type acyl-transferase family protein	GO:0016747;GO:0042759;GO:0010025	AT4G24510	-4.33946606842076	1.60828812636932e-05
Cc04_g06340	GSCOC_T00022420001	A0A068TSM5	Thaumatin-like protein		AT1G75040	-4.33577828565442	2.31855881164214e-06
Cc10_g11930	GSCOC_T00031872001	A0A068URM1	Filament-like plant protein (Fragment)		AT1G77580	-4.33286969370049	3.17269021594374e-07
Cc06_g16470	GSCOC_T00030688001	A0A068UNH5	Probably inactive leucine-rich repeat receptor-like protein kinase At5g06940	GO:0016021;GO:0005524;GO:0004672	AT5G06940	-4.2812474994367	0.00521612144828993
Cc07_g08590	GSCOC_T00040238001	A0A068U3M4	Putative Probable receptor-like protein kinase At1g67000	GO:0030247		-4.27208982500852	0.000186632201643312
Cc10_g14500	GSCOC_T00033583001	A0A068USF9	Hypothetical protein	GO:0016021		-4.25475868693758	0.000797069169829698
Cc01_g16160	GSCOC_T00016474001	A0A068U5X5	Putative unknown protein; BEST Arabidopsis thaliana protein match is	GO:0080167		-4.2083675518112	0.00285368818780766
Cc11_g13700	GSCOC_T00032149001	A0A068TWF1	Glutathione S-transferase U17		AT1G10370	-4.18309853395812	0.000221982379387538
Cc02_g39730	GSCOC_T00027676001	A0A068UJK4	Ras-related protein RABA3	GO:0005525;GO:0003924	AT1G01200	-4.17383443986901	0.00279828020611077
Cc09_g01560	GSCOC_T00017793001	A0A068U7X6	5'-adenylylsulfate reductase 3, chloroplastic	GO:0016671;GO:0019419	AT4G21990	-4.14267820675088	2.40912898980004e-05
Cc01_g12960	GSCOC_T00028253001	A0A068ULE9	Expansin-A4	GO:0005618;GO:0005576;GO:0016020;GO:0009664	AT2G39700	-4.13576740118929	3.2663403701031e-07
Cc10_g13610	GSCOC_T00035262001	A0A068UTR8	Putative Probable calcium-binding protein CML44	GO:0005509	AT1G21550	-4.12054831708072	3.33150123370944e-06
Cc10_g01010	GSCOC_T00024564001	A0A068UFU0	High mobility group B protein 9	GO:0005634;GO:0003677	AT1G76110	-4.07935484695162	0.000233342587761164
Cc00_g17860	GSCOC_T00008903001	A0A068VI29	Probable polygalacturonase	GO:0004650;GO:0005975		-4.07840081272678	0.000200995725765481
Cc11_g13820	GSCOC_T00032134001	A0A068TW60	Putative Transcription factor bHLH79	GO:0046983;GO:0006355	AT5G62610	-4.06336189555658	0.000303142196394818
Cc08_g08390	GSCOC_T00007225001	A0A068VC38	Auxin-induced protein 15A	GO:0009733	AT5G18060	-4.06298044502515	0.00801618963006016
Cc07_g03490	GSCOC_T00039583001	A0A068U265	Expansin-A15	GO:0005618;GO:0005576;GO:0016020;GO:0009664	AT2G03090	-4.03795594406864	0.000944732816096096
Cc01_g10950	GSCOC_T00024211001	A0A068UEU6	Cytokinin riboside 5'-monophosphate phosphoribohydrolase LOG1	GO:0016787;GO:0009691	AT2G28305	-4.03334295300176	0.000564353981837233
Cc08_g08800	GSCOC_T00017212001	A0A068V6E1	Putative BURP domain-containing protein 5		AT5G25610	-4.03105679005835	4.03379212691988e-08
Cc11_g05620	GSCOC_T00020525001	A0A068UB84	Serine/threonine-protein kinase BRI1-like 2	GO:0016021;GO:0005524;GO:0004674	AT2G01950	-3.99763474588295	0.00762275230842692
Cc10_g01110	GSCOC_T00024577001	A0A068UFU7	Putative Major facilitator superfamily protein	GO:0016021;GO:0022857		-3.98166045959014	1.32827563953043e-06
Cc08_g01090	GSCOC_T00038431001	A0A068UYZ7	LRR receptor-like serine/threonine-protein kinase ERECTA	GO:0016021;GO:0005524;GO:0004674	AT2G26330	-3.9802218366381	3.01183058094285e-06
Cc07_g07420	GSCOC_T00040091001	A0A068U2W8	Squalene monooxygenase	GO:0016021;GO:0050660;GO:0004506;GO:0016126	AT1G58440	-3.97806873279602	6.36175372397303e-05
Cc09_g03590	GSCOC_T00017527001	A0A068U7U5	Putative ROP-interactive CRIB motif-containing protein 4		AT5G16490	-3.97673067671294	6.51475019992202e-08
Cc01_g05180	GSCOC_T00011472001	A0A068VA14	Omega-6 fatty acid desaturase, endoplasmic reticulum isozyme 2	GO:0016021;GO:0016717;GO:0006629	AT3G12120	-3.97053730129855	0.000274303023801782
Cc07_g09400	GSCOC_T00037248001	A0A068U1I6	Sulfite exporter TauE/SafE family protein	GO:0016021	AT2G25737	-3.96372469157612	0.000139520227620132
Cc10_g04190	GSCOC_T00034966001	A0A068TZ68	Chlorophyll a-b binding protein P4, chloroplastic	GO:0009535;GO:0016021;GO:0009522;GO:0009523;GO:0016168;GO:0009765;GO:0018298	AT1G45474	-3.96337887198048	5.52228076116017e-05
Cc02_g36510	GSCOC_T00003915001	A0A068VB37	Fasciclin-like arabinogalactan protein 8	GO:0016021	AT2G45470	-3.95002458113639	0.00918228316429262
Cc05_g10100	GSCOC_T00021500001	A0A068UD50	Probable glutathione S-transferase		AT1G78380	-3.94892955618118	8.69257812057872e-05
Cc03_g04160	GSCOC_T00026125001	A0A068TST5	Putative uncharacterized protein		AT3G22800	-3.94633246420161	0.00886202659124065
Cc09_g01120	GSCOC_T00017852001	A0A068U7G0	Putative RING/U-box superfamily protein			-3.93630203585065	3.64303078628905e-06
Cc04_g09420	GSCOC_T00022830001	A0A068TQZ5	Putative uncharacterized protein	GO:0046983;GO:0006355	AT5G50915	-3.92575969665402	1.3831554033124e-13
Cc08_g04630	GSCOC_T00015666001	A0A068V4M7	Pectinacetylesterase family protein	GO:0005618;GO:0005576;GO:0016787;GO:0071555	AT4G19420	-3.916735741087	1.86083953757844e-19
Cc02_g02580	GSCOC_T00020116001	A0A068UAE6	BAHD acyltransferase DCR	GO:0005737;GO:0016747;GO:0010143;GO:0051179;GO:0010090	AT5G23940	-3.91201531244114	5.17810968037899e-09
Cc07_g09660	GSCOC_T00037213001	A0A068U318	Putative Transcription factor bHLH64	GO:0046983;GO:0006355	AT4G34530	-3.88142699334216	3.17269021594374e-07
Cc06_g20050	GSCOC_T00022903001	A0A068UDG9	plectin-related	GO:0003779;GO:0007015;GO:0010119	AT2G26770	-3.87338473604512	2.27092811074892e-09
Cc02_g19530	GSCOC_T00014521001	A0A068TMU3	Protein of unknown function (DUF620)			-3.86299396401776	7.32556058268863e-06
Cc03_g04570	GSCOC_T00026182001	A0A068TUX6	3-ketoacyl-CoA synthase 17	GO:0016021;GO:0016747;GO:0006633	AT1G04220	-3.84053229702451	9.26536385418211e-09
Cc02_g19810	GSCOC_T00014556001	A0A068TMQ4	Probable beta-D-xylosidase 5	GO:0004553;GO:0005975	AT3G19620	-3.83801205909215	0.000152217366067385
Cc10_g14810	GSCOC_T00033629001	A0A068USV3	Putative Auxin-induced protein 5NG4	GO:0016021;GO:0022857	AT1G43650	-3.82894136406017	0.00503748980500968
Cc01_g09120	GSCOC_T00023956001	A0A068UF44	Ferredoxin-3, chloroplastic	GO:0009507;GO:0051537;GO:0009055;GO:0046872	AT2G27510	-3.82026813707992	1.18269293754975e-12
Cc05_g11180	GSCOC_T00021348001	A0A068UBX9	Phosphoenolpyruvate carboxylase	GO:0008964;GO:0015977;GO:0006099	AT3G14940	-3.81972323126242	2.57708729031486e-09
Cc06_g23290	GSCOC_T00040593001	A0A068V340	Protein of unknown function (DUF620)			-3.81476458907937	1.3721941225926e-07
Cc03_g01200	GSCOC_T00025725001	A0A068TRE9	Putative P-loop containing nucleoside triphosphate hydrolases superfamily protein	GO:0016021		-3.81006366256077	1.89458860738011e-06
Cc00_g25680	GSCOC_T00001556001	A0A068VKL1	8-hydroxyquercetin 8-O-methyltransferase	GO:0008171		-3.80749295965945	5.89310835388711e-08
Cc06_g14090	GSCOC_T00041302001	A0A068U3Z2	Putative Auxin-induced protein 5NG4	GO:0016021;GO:0022857	AT4G30420	-3.78787313990539	7.89106352880866e-05
Cc11_g12000	GSCOC_T00032372001	A0A068TWV0	Probable inactive purple acid phosphatase 1	GO:0003993;GO:0046872	AT1G13750	-3.77621862748869	8.70923510383762e-08
Cc07_g09190	GSCOC_T00040315001	A0A068U3S0	Putative RmlC-like cupins superfamily protein	GO:0016021;GO:0045735	AT2G18540	-3.77114560770347	2.94722892474194e-05
Cc05_g04800	GSCOC_T00035016001	A0A068UU13	Putative Protein TRANSPARENT TESTA 12	GO:0016021;GO:0015297;GO:0042910	AT3G21690	-3.73611415954234	0.000325310447868355
Cc07_g06280	GSCOC_T00039927001	A0A068U4I3	Putative Uncharacterized protein At4g06744		AT4G06744	-3.7320598198383	0.00147441469386309
Cc03_g11350	GSCOC_T00000035001	A0A068VFA7	Purine permease 3	GO:0016021;GO:0015211	AT1G28220	-3.73091054528374	0.00687944079022984
Cc07_g10860	GSCOC_T00037064001	A0A068U2P9	Pathogenesis-related protein 5	GO:0016021	AT1G75040	-3.71754405001286	8.44706450726655e-05
Cc08_g08460	GSCOC_T00009039001	A0A068VC95	Dehydration-responsive protein RD22		AT5G25610	-3.71536287408061	5.9908742689138e-08
Cc08_g02700	GSCOC_T00037754001	A0A068UXN2	Carboxylesterase 1	GO:0016787	AT5G62180	-3.70412260537223	8.61807408680297e-05
Cc06_g16970	GSCOC_T00004154001	A0A068VDN0	MATE efflux family protein 1	GO:0016021;GO:0015297;GO:0042910	AT1G51340	-3.69614275806433	0.0035242987903301
Cc01_g08180	GSCOC_T00015510001	A0A068V505	Putative Receptor-like protein 12	GO:0016021	AT2G33030	-3.67470673172617	0.000226006522694912
Cc02_g19090	GSCOC_T00014473001	A0A068TLN2	Uncharacterized protein At4g06744		AT4G06744	-3.67182379782998	0.0027045510833167
Cc02_g05600	GSCOC_T00039073001	A0A068V082	Putative WEB family protein At2g38370		AT2G40480	-3.62816050400409	0.000105247663910259
Cc05_g12850	GSCOC_T00021135001	A0A068UCB7	Calcium-binding protein PBP1		AT4G27280	-3.61108551104355	0.00786073165429914
Cc07_g17860	GSCOC_T00018835001	A0A068U8F7	Putative Transducin/WD40 repeat-like superfamily protein			-3.59744790978178	0.00988589474973478
Cc00_g06260	GSCOC_T00010080001	A0A068VDB7	Putative Hydroxycinnamoyl-Coenzyme A shikimate/quinate hydroxycinnamoyltransferase	GO:0016747	AT2G19070	-3.58438708349864	5.45400743437705e-11
Cc04_g02390	GSCOC_T00021910001	A0A068TRG2	GDSL esterase/lipase APG	GO:0016788	AT3G16370	-3.58103940879844	0.000911151384262377
Cc05_g05510	GSCOC_T00035120001	A0A068UW58	Xyloglucan endotransglucosylase/hydrolase protein 9	GO:0048046;GO:0005618;GO:0004553;GO:0016762;GO:0042546;GO:0071555;GO:0010411	AT4G03210	-3.5800165739822	0.00705535164799495
Cc02_g08500	GSCOC_T00029785001	A0A068TVE2	Plant protein 1589 of unknown function			-3.57658805343526	0.00510557331441956
Cc06_g01400	GSCOC_T00023358001	A0A068UE54	Vacuolar cation/proton exchanger 1	GO:0016021;GO:0005774;GO:0015369	AT2G38170	-3.56125844270355	2.05511852423034e-10
Cc04_g03830	GSCOC_T00022092001	A0A068TQ05	alpha/beta-Hydrolases superfamily protein	GO:0016021		-3.55960113949257	0.00880650701346243
Cc00_g22690	GSCOC_T00011338001	A0A068VJL8	BURP domain-containing protein 3		AT5G25610	-3.53205076087129	0.00146281292877156
Cc03_g09600	GSCOC_T00030944001	A0A068UP28	Putative Transcription factor bHLH77	GO:0046983;GO:0006355	AT3G23690	-3.53003234807095	0.00309886589669286
Cc02_g33120	GSCOC_T00015326001	A0A068V4M6	Putative uncharacterized protein	GO:0046872;GO:0030001	AT5G27690	-3.52770841638646	9.020525707967e-12
Cc06_g09650	GSCOC_T00041886001	A0A068U6U2	ATP binding microtubule motor family protein	GO:0005874;GO:0005524;GO:0008017;GO:0003777;GO:0007018	AT3G16060	-3.50952676348756	9.86373847455987e-07
Cc02_g15110	GSCOC_T00013945001	A0A068TLF7	Putative Protein of unknown function (DUF688)			-3.46536856484085	0.00215151990864913
Cc02_g10080	GSCOC_T00029568001	A0A068TV65	Cytochrome P450 77A3	GO:0016021;GO:0020037;GO:0005506;GO:0004497;GO:0016705	AT5G04660	-3.45023837926873	2.25722471495906e-07
Cc07_g06890	GSCOC_T00040016001	A0A068U345	Scarecrow-like protein 32		AT3G49950	-3.44740637396594	0.00673856451060207
Cc01_g09730	GSCOC_T00024037001	A0A068UH50	Uncharacterized protein At5g22580		AT5G22580	-3.44214869997683	0.00114693428340569
Cc06_g21530	GSCOC_T00008024001	A0A068VA13	Core-2/I-branching beta-1,6-N-acetylglucosaminyltransferase family protein	GO:0016020;GO:0009567;GO:0048868	AT5G39990	-3.43911876326944	0.00539522880056365
Cc00_g05170	GSCOC_T00000315001	A0A068VCP2	Putative Cytochrome P450 86B1	GO:0020037;GO:0005506;GO:0004497;GO:0016705	AT1G57750	-3.42586715629907	5.06887884370054e-06
Cc08_g02340	GSCOC_T00037702001	A0A068UZA9	Nitrate transporter 1.5	GO:0016021;GO:0022857	AT1G32450	-3.39329511662465	0.000124370378042355
Cc00_g11350	GSCOC_T00007943001	A0A068VFS5	Beta-glucosidase 11	GO:0004553;GO:0005975	AT1G02850	-3.38952886273962	3.97975959151813e-05
Cc09_g00420	GSCOC_T00017952001	A0A068U7N1	Oligopeptide transporter 3	GO:0016021;GO:0055085	AT4G16370	-3.37613225162107	1.12887263548054e-05
Cc11_g14400	GSCOC_T00032063001	A0A068TWA0	Putative Auxin-induced protein 5NG4	GO:0016021;GO:0022857	AT3G28050	-3.37560958803262	0.00247691156884879
Cc06_g09480	GSCOC_T00041909001	A0A068U480	Predicted protein (Fragment)		AT3G24480	-3.36460593534092	0.00044684688670969
Cc08_g13880	GSCOC_T00030292001	A0A068UN02	Protein HOTHEAD	GO:0050660;GO:0016614	AT1G72970	-3.36091243200353	3.90239673636901e-05
Cc07_g12300	GSCOC_T00036893001	A0A068U0R5	Auxin efflux carrier family protein	GO:0016021;GO:0055085	AT1G76520	-3.32865079812778	0.00495560793818991
Cc01_g18330	GSCOC_T00016218001	A0A068U830	Putative unknown protein; FUNCTIONS IN			-3.31273101811506	0.00565935647974373
Cc03_g15040	GSCOC_T00026761001	A0A068UIE7	Putative uncharacterized protein	GO:0016021	AT3G25500	-3.30632328801774	4.27251320274347e-05
Cc02_g01620	GSCOC_T00019989001	A0A068UBP8	Probable pectinesterase/pectinesterase inhibitor 34	GO:0016021;GO:0045330;GO:0004857;GO:0030599;GO:0042545;GO:0045490	AT3G49220	-3.30019695510477	0.00819750381671359
Cc01_g21620	GSCOC_T00004958001	A0A068V8S9	Long chain acyl-CoA synthetase 1	GO:0003824	AT2G47240	-3.2925441977881	6.77938930957692e-06
Cc02_g06310	GSCOC_T00039158001	A0A068UZM2	Putative Vinorine synthase	GO:0016747		-3.28991665149145	0.00264814494063525
Cc11_g10570	GSCOC_T00032560001	A0A068TX04	Putative leucine-rich repeat receptor-like serine/threonine-protein kinase At2g14440	GO:0005768;GO:0016021;GO:0005886;GO:0005802;GO:0005773		-3.26847907069018	4.73959700758778e-05
Cc05_g01940	GSCOC_T00040844001	A0A068V179	Putative UDP-glucose flavonoid 3-O-glucosyltransferase 3		AT3G21760	-3.2518227652269	0.00404779185289486
Cc01_g11270	GSCOC_T00024252001	A0A068UFT2	Beta-galactosidase 8	GO:0004565;GO:0030246;GO:0005975	AT2G28470	-3.25053537207832	4.29111553247286e-06
Cc07_g14490	GSCOC_T00036609001	A0A068TYZ4	Putative uncharacterized protein	GO:0051015;GO:0004553;GO:0030674;GO:0007015;GO:0005975		-3.22877780629457	0.000875805525438814
Cc10_g07380	GSCOC_T00034531001	A0A068U093	Putative unknown protein; FUNCTIONS IN			-3.22012745722409	4.64137240216711e-06
Cc01_g16150	GSCOC_T00016475001	A0A068U623	Putative Bifunctional inhibitor/lipid-transfer protein/seed storage 2S albumin superfamily protein	GO:0005504;GO:0009627	AT5G48485	-3.20894546846491	0.00768795077551779
Cc00_g12040	GSCOC_T00005331001	A0A068VGB5	Nitrate reductase [NADH]	GO:0020037;GO:0030151;GO:0043546;GO:0050464;GO:0042128;GO:0006809	AT5G17770	-3.19350434660159	0.00321578571279951
Cc02_g13180	GSCOC_T00029189001	A0A068TUB9	Putative Tetraspanin family protein	GO:0016021		-3.1689453804629	1.25260616439989e-09
Cc00_g13310	GSCOC_T00009406001	A0A068VGB3	Putative Uncharacterized protein	GO:0046872;GO:0030001	AT5G19090	-3.15459426580236	0.0019944690412871
Cc04_g11500	GSCOC_T00037341001	A0A068UWS3	Tropinone reductase homolog At1g07440	GO:0016491	AT5G06060	-3.15126280760434	0.00462057854446656
Cc08_g12840	GSCOC_T00030423001	A0A068UN10	Adenine phosphoribosyltransferase 1, chloroplastic	GO:0005737;GO:0003999;GO:0006168;GO:0009116	AT4G12440	-3.13743522161274	0.000101650211387778
Cc08_g08830	GSCOC_T00017215001	A0A068V5U5	BURP domain-containing protein 3		AT5G25610	-3.12191415147272	1.41412971426427e-09
Cc09_g10110	GSCOC_T00041090001	A0A068V1X2	Putative Subtilisin-like protease	GO:0004252	AT5G45650	-3.11552469870875	0.00533917335403516
Cc05_g00750	GSCOC_T00013165001	A0A068VAI9	Putative Acidic endochitinase	GO:0005975	AT5G24090	-3.11484344705576	0.00912313459189227
Cc07_g12310	GSCOC_T00036890001	A0A068U2C6	Diacylglycerol O-acyltransferase 2	GO:0016021;GO:0016747	AT3G51520	-3.11414490717612	1.97197844230778e-06
Cc11_g15880	GSCOC_T00038114001	A0A068UY79	GDSL esterase/lipase At3g26430	GO:0016788	AT3G26430	-3.09935039082111	2.07518494131896e-10
Cc04_g01990	GSCOC_T00021864001	A0A068TRC2	Beta-galactosidase	GO:0009505;GO:0009506;GO:0004565;GO:0030246;GO:0005975	AT3G13750	-3.09803308657341	0.000491353697941189
Cc11_g09700	GSCOC_T00032686001	A0A068TXN5	Non-specific lipid-transfer protein 2	GO:0006869		-3.09544741832503	0.000826105984696561
Cc04_g12200	GSCOC_T00005269001	A0A068V8N8	unknown protein; FUNCTIONS IN	GO:0016021		-3.09403129748957	0.00623184978279318
Cc00_g31440	GSCOC_T00006470001	A0A068VQ08	Wound-responsive family protein			-3.08302728773873	0.00866289312618843
Cc09_g06490	GSCOC_T00005100001	A0A068VAI8	Delta(24)-sterol reductase	GO:0016021;GO:0071949;GO:0016491	AT3G19820	-3.07139531671411	0.000673656587641115
Cc09_g00440	GSCOC_T00017950001	A0A068U8K6	Uncharacterized protein	GO:0046872;GO:0030001		-3.06724639639479	9.00722600434673e-05
Cc07_g08840	GSCOC_T00040274001	A0A068U3P4	3-ketoacyl-CoA synthase 6	GO:0016021;GO:0016747;GO:0006633	AT1G68530	-3.06501012814832	0.00241798186487539
Cc05_g11950	GSCOC_T00021251001	A0A068UCJ7	VQ motif-containing protein		AT1G28280	-3.05752445338565	0.00210434076376486
Cc11_g11720	GSCOC_T00032409001	A0A068TWM5	MADS-box protein CMB1	GO:0005634;GO:0003700;GO:0046983;GO:0000977;GO:0045944	AT2G03710	-3.03592928896704	0.00852201447585272
Cc09_g05050	GSCOC_T00007077001	A0A068VCA0	Cationic amino acid transporter 5	GO:0016021;GO:0022857	AT2G34960	-3.03253511881132	6.90725735213467e-05
Cc06_g23300	GSCOC_T00040592001	A0A068V162	Protein of unknown function (DUF620)			-3.01785268234718	0.00303900975774089
Cc04_g02320	GSCOC_T00021901001	A0A068TNX2	Putative Predicted protein	GO:2000028	AT2G25930	-3.00492057627893	0.00033853680314997
Cc03_g09720	GSCOC_T00030959001	A0A068UPQ6	Probable aldo-keto reductase 2	GO:0016491	AT1G60710	-2.99829284177194	0.00441630744042574
Cc03_g00700	GSCOC_T00025662001	A0A068TRA7	Putative Ca2 -binding protein 1	GO:0005829;GO:0005509;GO:0042538	AT5G49480	-2.99584612976235	9.31953067738176e-05
Cc10_g11920	GSCOC_T00031871001	A0A068UTF5	Quinone oxidoreductase-like protein At1g23740, chloroplastic	GO:0016491;GO:0008270	AT1G23740	-2.9662674033442	0.00627721836382333
Cc05_g11580	GSCOC_T00021297001	A0A068UBU0	Putative Predicted protein	GO:0009507;GO:0010207		-2.95550554306613	0.000659250783815453
Cc09_g10600	GSCOC_T00041025001	A0A068V3Q0	Hypothetical protein		AT4G35250	-2.93210252642759	8.9124578014784e-10
Cc04_g06540	GSCOC_T00022443001	A0A068TSP5	Putative Uncharacterized GPI-anchored protein At4g28100		AT4G28100	-2.93048384121565	0.000317668854929778
Cc09_g00860	GSCOC_T00017891001	A0A068U834	Rho GDP-dissociation inhibitor 1	GO:0005737;GO:0005094	AT3G07880	-2.92376522829783	0.000120161001480625
Cc05_g08260	GSCOC_T00016844001	A0A068V562	Putative LRR receptor-like serine/threonine-protein kinase GSO1			-2.91688776047208	0.000132030536063325
Cc02_g18220	GSCOC_T00014359001	A0A068TP31	cytochrome b6f complex subunit (petM), putative	GO:0009535;GO:0009512;GO:0016021;GO:0019904		-2.90649266091686	0.00106240457829249
Cc04_g02840	GSCOC_T00021966001	A0A068TRL1	Aquaporin TIP2-1	GO:0016021;GO:0015267	AT3G16240	-2.90472344976334	0.00129258143186563
Cc07_g02160	GSCOC_T00039398001	A0A068U0R6	Carbonic anhydrase, chloroplastic	GO:0004089;GO:0008270;GO:0015976	AT3G01500	-2.89331579990284	1.54509432101412e-05
Cc04_g07230	GSCOC_T00022533001	A0A068TQX3	Putative uncharacterized protein	GO:0046872;GO:0030001		-2.89288333747963	0.00136104072666952
Cc04_g06590	GSCOC_T00022450001	A0A068TSQ1	Beta-glucosidase 44	GO:0004553;GO:0005975	AT3G18080	-2.89182414344651	0.00160108158140996
Cc03_g12410	GSCOC_T00015223001	A0A068U4L0	Chitinase 2	GO:0004553;GO:0005975		-2.89119546127903	0.00902070672880176
Cc01_g19100	GSCOC_T00016102001	A0A068U5A1	Plant protein of unknown function (DUF828) with plant pleckstrin homology-like region	GO:0009734;GO:0010305;GO:0010087	AT3G63300	-2.8827335164482	0.0099954660660859
Cc03_g04670	GSCOC_T00026194001	A0A068TUY9	Auxin-responsive protein IAA7	GO:0005634;GO:0009734;GO:0006355	AT3G23050	-2.87304596566488	0.000137472678177147
Cc00_g02580	GSCOC_T00001684001	A0A068VAX2	Putative Glucan endo-1,3-beta-glucosidase-like protein 3		AT1G18650	-2.87223377788922	0.00150096124856287
Cc02_g25260	GSCOC_T00028772001	A0A068UM84	Cyclin-U4-1	GO:0019901;GO:0000079	AT2G44740	-2.86704334507734	2.69174604493246e-05
Cc00_g20290	GSCOC_T00010953001	A0A068VJ54	Cysteine proteinase RD19a	GO:0008234	AT4G39090	-2.86552359322996	5.16008475634768e-07
Cc02_g17640	GSCOC_T00014284001	A0A068TL54	Mitochondrial transcription termination factor family protein	GO:0009507;GO:0042646;GO:0003690;GO:0071472;GO:0006355		-2.85482505741252	6.0649006753178e-05
Cc04_g10530	GSCOC_T00042605001	A0A068V2N5	GDSL esterase/lipase At3g48460	GO:0016788	AT3G48460	-2.85469788258962	5.49439996483287e-12
Cc06_g09210	GSCOC_T00041944001	A0A068U4Z0	ABC transporter G family member 32	GO:0016021;GO:0005524;GO:0016887	AT2G26910	-2.84671052060645	0.00133354768175792
Cc10_g04830	GSCOC_T00034888001	A0A068U109	Putative uncharacterized protein			-2.84490894448907	0.00461640646705866
Cc04_g13440	GSCOC_T00018287001	A0A068V6K8	Predicted protein		AT5G14920	-2.84131066433365	0.000160165868785443
Cc09_g02390	GSCOC_T00017684001	A0A068U823	Putative Uncharacterized CDP-alcohol phosphatidyltransferase class-I family protein C22A12.08c			-2.83500888262226	0.00309886589669286
Cc02_g22170	GSCOC_T00014883001	A0A068TQ73	Late embryogenesis abundant (LEA) hydroxyproline-rich glycoprotein family			-2.8340090201562	8.80288949428349e-07
Cc01_g13620	GSCOC_T00028335001	A0A068UKS0	Putative uncharacterized protein	GO:0016021;GO:0008270		-2.8296085187011	4.17187842168618e-06
Cc04_g14900	GSCOC_T00040775001	A0A068V3D3	Putative Uncharacterized protein At5g01610		AT5G01610	-2.82906958854937	2.70214431613546e-05
Cc00_g16260	GSCOC_T00011524001	A0A068VHD7	Hypothetical protein			-2.81686328238096	0.000187053375174127
Cc04_g09740	GSCOC_T00000095001	A0A068VIX5	Putative Probable NAD(P)H-dependent oxidoreductase 2	GO:0016491	AT2G37790	-2.81553575331891	1.06664634887828e-13
Cc05_g11820	GSCOC_T00021266001	A0A068UCD3	Serine/threonine-protein kinase WNK (With No Lysine)-related			-2.81039323012779	0.000742684220472781
Cc09_g01020	GSCOC_T00017869001	A0A068U7H0	Putative Uncharacterized membrane protein At1g16860	GO:0016021	AT1G16860	-2.80944929055307	0.000142335101716852
Cc09_g01490	GSCOC_T00017801001	A0A068U890	Aminomethyltransferase, mitochondrial	GO:0005739;GO:0004047;GO:0008483;GO:0006546	AT1G11860	-2.80628755662623	0.000120161001480625
Cc05_g04740	GSCOC_T00035009001	A0A068UTP1	Aromatic-L-amino-acid decarboxylase	GO:0016831;GO:0030170;GO:0006520	AT2G20340	-2.79717860038203	0.00822592037799564
Cc02_g11300	GSCOC_T00029428001	A0A068TUQ3	Auxin response factor 18	GO:0005634;GO:0003677;GO:0009734;GO:0051301;GO:0007389;GO:0006355;GO:0048829	AT4G30080	-2.79515851623789	0.000112654183914989
Cc08_g08860	GSCOC_T00017220001	A0A068V891	Putative Dehydration-responsive protein RD22		AT5G25610	-2.78811895344489	2.34308625910045e-09
Cc01_g00080	GSCOC_T00012431001	A0A068VCN1	Protein of Unknown Function (DUF239)	GO:0016021		-2.78419940281493	0.0025597560376317
Cc11_g09040	GSCOC_T00032795001	A0A068TWS8	unknown protein; FUNCTIONS IN	GO:0016021		-2.7835838835458	0.000116282861882545
Cc02_g00660	GSCOC_T00019856001	A0A068U9J4	UNC93-like protein 2	GO:0016021	AT1G18000	-2.78239924467959	1.2719731809716e-05
Cc01_g01450	GSCOC_T00037907001	A0A068UX46	Putative UDP-glycosyltransferase 74F2	GO:0008194	AT2G43820	-2.78170957218095	0.00209808271537925
Cc03_g00020	GSCOC_T00025573001	A0A068TTQ0	Aspartic proteinase oryzasin-1	GO:0004190;GO:0006629	AT1G11910	-2.76430770919284	5.86959082430791e-06
Cc07_g13320	GSCOC_T00036758001	A0A068U023	Cysteine-rich repeat secretory protein 60	GO:0016021	AT5G37660	-2.75173913780205	0.0051369120617987
Cc02_g32680	GSCOC_T00001208001	A0A068VE39	GDSL esterase/lipase At1g54790	GO:0016788		-2.74961682452352	0.00963864538251589
Cc06_g01510	GSCOC_T00023372001	A0A068UD59	Auxin transporter-like protein 2	GO:0016021	AT2G38120	-2.74654485669879	0.000418596573477235
Cc01_g09870	GSCOC_T00024057001	A0A068UFB7	Putative Hyoscyamine 6-dioxygenase	GO:0046872;GO:0016491		-2.73973135410553	0.000302115439742026
Cc02_g21280	GSCOC_T00014765001	A0A068TN86	ABC transporter G family member 11	GO:0016021;GO:0005524;GO:0016887	AT1G17840	-2.735292953115	2.52353564929362e-05
Cc04_g08060	GSCOC_T00022654001	A0A068TQB6	Tropinone reductase homolog At1g07440		AT5G06060	-2.72383712458976	0.000940676355605662
Cc01_g02420	GSCOC_T00009711001	A0A068V9Z1	Putative Bifunctional inhibitor/lipid-transfer protein/seed storage 2S albumin superfamily protein	GO:0016021	AT2G44290	-2.71821878201097	0.00441059270248086
Cc07_g05830	GSCOC_T00039865001	A0A068U4E2	NAD(P)-binding Rossmann-fold superfamily protein			-2.71797343513938	0.000190032696610107
Cc11_g09660	GSCOC_T00032691001	A0A068TZA2	Probable inactive leucine-rich repeat receptor-like protein kinase At1g66830	GO:0016021;GO:0005524;GO:0004672	AT2G01210	-2.71458040035539	8.65020668615442e-06
Cc11_g13590	GSCOC_T00032164001	A0A068TVH2	Nitrate transporter 1.7	GO:0016021;GO:0022857	AT1G69870	-2.70764130508537	0.000302115439742026
Cc06_g16420	GSCOC_T00030695001	A0A068UNI2	Putative Transcription factor bHLH60	GO:0046983;GO:0006355	AT2G42300	-2.70408088796472	7.20688659148642e-08
Cc11_g17510	GSCOC_T00038325001	A0A068UXY2	Acyl carrier protein 1, chloroplastic	GO:0009941;GO:0009570;GO:0031177;GO:0006633;GO:0009416	AT1G54630	-2.70373760707778	9.25941174796944e-07
Cc05_g00040	GSCOC_T00017017001	A0A068V7Y5	unknown protein; FUNCTIONS IN	GO:0016021		-2.68890048649107	0.00249275860821872
Cc02_g16920	GSCOC_T00014194001	A0A068TNQ0	ATP binding microtubule motor family protein	GO:0005874;GO:0005524;GO:0008017;GO:0003777;GO:0007018	AT2G21300	-2.68769665474188	3.13754567128096e-08
Cc09_g10590	GSCOC_T00041026001	A0A068V1X9	Putative Uncharacterized protein ycf39	GO:0016021	AT4G35250	-2.68168434659304	0.000214628972337235
Cc03_g02760	GSCOC_T00025944001	A0A068TSC4	Peptide methionine sulfoxide reductase B3, chloroplastic	GO:0046872;GO:0033743;GO:0030091;GO:0006979	AT4G21860	-2.68083687384363	0.000372843018065522
Cc04_g05760	GSCOC_T00022342001	A0A068TPQ9	Uncharacterized protein At4g14100		AT4G14100	-2.67740867264188	0.00120982697386908
Cc03_g04210	GSCOC_T00026131001	A0A068TSU1	Plant protein of unknown function (DUF828) with plant pleckstrin homology-like region		AT3G63300	-2.67562452267566	0.000717655349028908
Cc07_g15630	GSCOC_T00036453001	A0A068TYR9	Peptidyl-prolyl cis-trans isomerase FKBP16-2, chloroplastic	GO:0003755	AT4G39710	-2.66744028105036	0.000273157241801229
Cc01_g09790	GSCOC_T00024046001	A0A068UFK2	Putative phytosulfokines 6	GO:0005576;GO:0008083;GO:0008283	AT3G44735	-2.6669034226127	0.00212601160357275
Cc00_g19490	GSCOC_T00003022001	A0A068VIV3	Hypothetical protein			-2.6551717861787	0.00242640882449348
Cc06_g12950	GSCOC_T00041469001	A0A068U5W8	Putative Uncharacterized membrane protein At1g06890	GO:0016021	AT5G57100	-2.65085464727094	0.000356884399792575
Cc10_g04900	GSCOC_T00034879001	A0A068TYG4	Probable isoaspartyl peptidase/L-asparaginase 2	GO:0016787	AT3G16150	-2.65034826109923	0.00727046022691012
Cc05_g09110	GSCOC_T00002670001	A0A068VGE5	Putative Predicted protein	GO:0016021;GO:0035556		-2.64337761255133	2.70723759161927e-06
Cc08_g06540	GSCOC_T00036047001	A0A068UV83	Probable xyloglucan glycosyltransferase 5	GO:0016021	AT4G31590	-2.63473198040294	0.00606831609154836
Cc02_g17170	GSCOC_T00014223001	A0A068TNS4	Beta-galactosidase 3	GO:0004565;GO:0005975	AT4G36360	-2.63439585589408	0.00226420417106263
Cc02_g19720	GSCOC_T00014546001	A0A068TPI6	LOB domain-containing protein, putative		AT4G37540	-2.6322159359853	2.05192779764619e-06
Cc06_g03370	GSCOC_T00023618001	A0A068UE15	Protein IN2-1 homolog B	GO:0005737;GO:0004364	AT5G02790	-2.62949164983398	0.000119639949341544
Cc06_g03680	GSCOC_T00023657001	A0A068UEQ0	Putative uncharacterized protein			-2.62523037863454	3.34711653688429e-05
Cc07_g10250	GSCOC_T00037142001	A0A068U196	Putative Lateral root primordium (LRP) protein-related		AT3G51060	-2.6129106883148	0.00203655145294872
Cc07_g06180	GSCOC_T00039914001	A0A068U4H3	Putative Filament-like plant protein 7		AT2G23360	-2.60807137934759	0.000890670785325523
Cc04_g01440	GSCOC_T00021795001	A0A068TR66	Putative unknown protein; BEST Arabidopsis thaliana protein match is	GO:0009734	AT1G54200	-2.60709529123872	0.00182622215507233
Cc03_g14540	GSCOC_T00026671001	A0A068UI91	Predicted protein			-2.60314471527952	0.00883015221692211
Cc08_g05750	GSCOC_T00024364001	A0A068UFH4	Hypothetical protein			-2.60233294998188	0.000102761035935409
Cc02_g05400	GSCOC_T00039048001	A0A068V065	RING-H2 finger protein ATL72	GO:0016021	AT3G10910	-2.59941444414991	0.00275182494685892
Cc01_g14140	GSCOC_T00028405001	A0A068ULQ3	Ammonium transporter 1 member 3	GO:0016021;GO:0008519	AT4G13510	-2.59412073407968	0.000142021252218445
Cc04_g00830	GSCOC_T00021708001	A0A068TP49	Subtilisin-like protease	GO:0004252	AT3G14240	-2.59117114788802	0.00946949777732198
Cc02_g09330	GSCOC_T00029668001	A0A068TVD5	Core-2/I-branching beta-1,6-N-acetylglucosaminyltransferase family protein	GO:0016020		-2.57346142420909	0.00259538577779725
Cc07_g12980	GSCOC_T00036806001	A0A068TZN2	indeterminate(ID)-domain 14	GO:0009630	AT1G68130	-2.5652512866565	1.41192330182477e-10
Cc06_g11680	GSCOC_T00041629001	A0A068U3K5	Lycopene epsilon cyclase, chloroplastic	GO:0016705;GO:0016117	AT5G57030	-2.55701900993795	0.000242217658425
Cc06_g17800	GSCOC_T00040371001	A0A068V018	Zeatin O-glucosyltransferase	GO:0008194	AT3G46670	-2.55511302459715	0.00161139778531492
Cc01_g05390	GSCOC_T00027326001	A0A068UIX9	Putative Phospholipase C 2	GO:0009507;GO:0004629;GO:0048229;GO:0009395;GO:0048364	AT2G26870	-2.54711633599379	0.00126777628566568
Cc02_g20620	GSCOC_T00014678001	A0A068TPR0	Oligopeptide transporter 4	GO:0016021;GO:0055085		-2.54170495337853	0.0060473255288546
Cc08_g09890	GSCOC_T00026943001	A0A068UKT8	Histidine-containing phosphotransfer protein 4	GO:0000160	AT3G29350	-2.54077633909388	0.00279828020611077
Cc02_g09280	GSCOC_T00029677001	A0A068TVE1	unknown protein; FUNCTIONS IN			-2.54074079054099	6.10217414340117e-05
Cc03_g01080	GSCOC_T00025711001	A0A068TS62	Hypothetical protein			-2.53619669905981	0.003923686828591
Cc00_g22250	GSCOC_T00007434001	A0A068VJ56	Blue copper protein	GO:0016021;GO:0009055	AT2G32300	-2.53253042658148	0.00538042919988271
Cc11_g11950	GSCOC_T00032378001	A0A068TWV6	Putative unknown protein; BEST Arabidopsis thaliana protein match is	GO:0008356		-2.52758721251519	0.00963415339699351
Cc01_g15410	GSCOC_T00016563001	A0A068U652	Root phototropism protein 2	GO:0005737;GO:0005634;GO:0009638	AT2G30520	-2.52453479396727	0.00768795077551779
Cc09_g10130	GSCOC_T00041085001	A0A068V194	Alpha,alpha-trehalose-phosphate synthase [UDP-forming] 1	GO:0003825;GO:0005992	AT1G78580	-2.48004819199075	0.00882438419046215
Cc07_g06680	GSCOC_T00039985001	A0A068U4M6	Arabinogalactan			-2.456230059333	5.14337320655883e-06
Cc08_g02990	GSCOC_T00037803001	A0A068UZH7	Putative Bifunctional dihydroflavonol 4-reductase/flavanone 4-reductase			-2.45481515096782	1.02091796415623e-05
Cc07_g13350	GSCOC_T00036754001	A0A068U0E6	Probable inactive receptor kinase At1g48480	GO:0016021;GO:0005524;GO:0004672	AT5G16590	-2.43345029039059	0.00944838988855128
Cc00_g25060	GSCOC_T00002589001	A0A068VKD7	Putative Beta-hexosaminidase subunit B2	GO:0004563;GO:0102148;GO:0005975	AT1G65590	-2.42058151608122	0.00132336349357883
Cc02_g38520	GSCOC_T00027853001	A0A068UKF1	Putative Heavy metal transport/detoxification superfamily protein	GO:0046872;GO:0030001	AT1G01490	-2.41964679183626	2.17164982185678e-09
Cc07_g02370	GSCOC_T00039425001	A0A068U1G1	UDP-glycosyltransferase 90A1	GO:0008194	AT2G16890	-2.40463695008805	0.00151316106280002
Cc05_g08440	GSCOC_T00016866001	A0A068V7Q5	Phospholipase A1-IIdelta	GO:0008970;GO:0006629	AT2G42690	-2.38889676473944	0.000116282861882545
Cc07_g06510	GSCOC_T00039961001	A0A068U1Z9	Putative Xyloglucan galactosyltransferase KATAMARI1 homolog	GO:0016757;GO:0006486	AT5G62220	-2.3877011687955	0.000495237192638478
Cc02_g30730	GSCOC_T00023815001	A0A068UGQ5	Auxin-responsive protein IAA16	GO:0005634;GO:0009734;GO:0006355	AT3G04730	-2.38408712063782	0.00242640882449348
Cc10_g08170	GSCOC_T00034428001	A0A068TYF3	Glutamyl-tRNA reductase 1, chloroplastic	GO:0008883;GO:0050661;GO:0006782	AT1G58290	-2.38053314865488	0.00135987594422793
Cc09_g03520	GSCOC_T00017537001	A0A068U6W7	Putative uncharacterized protein			-2.38038804204918	0.00204953684031695
Cc10_g09230	GSCOC_T00034272001	A0A068TZQ8	Protein of unknown function (DUF579)	GO:0045492	AT1G33800	-2.37797663414587	6.47410581330143e-05
Cc01_g11650	GSCOC_T00028070001	A0A068UMT3	Putative Interactor of constitutive active ROPs 3		AT5G60210	-2.36859330027991	0.000152217366067385
Cc02_g26690	GSCOC_T00024970001	A0A068UHG8	Protein of Unknown Function (DUF239)			-2.36575447622064	0.00180467100784355
Cc04_g02340	GSCOC_T00021905001	A0A068TRF6	Putative uncharacterized protein	GO:0046983	AT3G21330	-2.35582971858211	0.00135314659973239
Cc04_g03220	GSCOC_T00022015001	A0A068TP57	ATP binding microtubule motor family protein	GO:0005874;GO:0005634;GO:0005886;GO:0005524;GO:0008017;GO:0003777;GO:0007018;GO:1903338	AT3G16060	-2.35267353693433	0.00382479487347076
Cc02_g05510	GSCOC_T00039062001	A0A068UZF3	unknown protein; Has 39 Blast hits to 39 proteins in 15 species			-2.35067356881322	0.00128305102162325
Cc11_g14320	GSCOC_T00032072001	A0A068TW28	Nucleobase-ascorbate transporter 7	GO:0016021;GO:0022857	AT1G60030	-2.35006367721627	0.00672409960298768
Cc02_g29080	GSCOC_T00011537001	A0A068VF15	Putative Bifunctional dihydroflavonol 4-reductase/flavanone 4-reductase	GO:0003824	AT1G15950	-2.34689637712373	0.000932770125980598
Cc05_g12730	GSCOC_T00021152001	A0A068UBK0	Cyclic nucleotide-gated ion channel 4	GO:0016021;GO:0005216	AT5G54250	-2.34004770122167	0.000100161530131248
Cc03_g08340	GSCOC_T00033238001	A0A068UU87	Putative Nuclear migration protein nudC		AT5G53400	-2.3389032983244	0.00519248038716327
Cc02_g39450	GSCOC_T00027714001	A0A068UKD1	Putative Protein ASPARTIC PROTEASE IN GUARD CELL 1	GO:0004190	AT1G01300	-2.32662861163862	0.000181190175123359
Cc02_g31040	GSCOC_T00023875001	A0A068UF73	Putative Lysosomal beta glucosidase	GO:0016021;GO:0004553;GO:0005975		-2.32147595534031	0.00106240457829249
Cc11_g15370	GSCOC_T00038047001	A0A068UXT3	unknown protein; LOCATED IN	GO:0016021		-2.30279512920642	0.00903593104476853
Cc04_g05100	GSCOC_T00022255001	A0A068TQP1	NDH-dependent cyclic electron flow 1		AT1G15980	-2.29499541037315	0.0041489124134436
Cc08_g08890	GSCOC_T00017226001	A0A068V668	Putative BURP domain-containing protein 5			-2.28248330629023	0.00762275230842692
Cc05_g16370	GSCOC_T00038571001	A0A068UZ98	Phosphoglycerate kinase, cytosolic	GO:0005524;GO:0004618;GO:0006096	AT1G56190	-2.2812108073904	0.00024296124043718
Cc00_g18490	GSCOC_T00005333001	A0A068VIA7	Codeine O-demethylase	GO:0016491	AT1G17020	-2.26715663258892	0.00762275230842692
Cc07_g10350	GSCOC_T00037127001	A0A068U185	Putative GATA transcription factor 5	GO:0005634;GO:0043565;GO:0008270;GO:0006355	AT5G66320	-2.26603181739095	4.63620740401913e-06
Cc11_g12420	GSCOC_T00032318001	A0A068TWG6	Putative Uncharacterized protein At5g01610		AT5G01610	-2.25043945956236	1.84321146258757e-05
Cc06_g02880	GSCOC_T00023554001	A0A068UEF4	Short-chain dehydrogenase TIC 32, chloroplastic		AT4G23430	-2.24334650850264	0.00264814494063525
Cc00_g00450	GSCOC_T00036131001	A0A068UW42	Putative Arginine decarboxylase	GO:0003824		-2.24320821357031	0.00108245850603686
Cc00_g15710	GSCOC_T00006888001	P10795	Ribulose bisphosphate carboxylase small chain SSU11A, chloroplastic	GO:0009507;GO:0004497;GO:0016984;GO:0015977;GO:0009853;GO:0015979;GO:0009507;GO:0004497;GO:0016984;GO:0015977;GO:0009853;GO:0015979	AT1G67090	-2.23012597179622	0.000381303956471811
Cc04_g16320	GSCOC_T00035718001	A0A068UUS7	NDH dependent flow 6	GO:0009535;GO:0010598;GO:0009773	AT1G18730	-2.21598091542036	0.000892381385684352
Cc10_g04880	GSCOC_T00034882001	A0A068U105	Protein of unknown function (DUF3223)	GO:0009507	AT1G45230	-2.21543322267692	0.00710481016788201
Cc02_g17340	GSCOC_T00014246001	A0A068TL29	Glucose-1-phosphate adenylyltransferase large subunit 1 (Fragment)	GO:0009507;GO:0005524;GO:0008878;GO:0005978;GO:0019252	AT4G39210	-2.21387242182779	0.000414668987746244
Cc01_g08950	GSCOC_T00023933001	A0A068UEB2	Putative NAD(P)H-quinone oxidoreductase subunit N	GO:0009941;GO:0009535;GO:0016655;GO:0009817;GO:0010258	AT5G58260	-2.21321201837064	0.00815887724913134
Cc10_g04620	GSCOC_T00034914001	A0A068TZF8	Probable serine/threonine-protein kinase At1g01540	GO:0016021;GO:0005524;GO:0004672	AT1G01540	-2.20589087807394	0.000356884399792575
Cc08_g13270	GSCOC_T00030363001	A0A068UNJ6	unknown protein; INVOLVED IN		AT5G12900	-2.20540117336732	0.00191833430521869
Cc11_g15150	GSCOC_T00001010001	A0A068VE06	unknown protein; INVOLVED IN	GO:0000911	AT3G48860	-2.20472996429645	0.00790163622237578
Cc10_g03510	GSCOC_T00024877001	A0A068UGH2	30S ribosomal protein S9, chloroplastic (Fragment)	GO:0005840;GO:0003735;GO:0006412	AT1G74970	-2.18944223396272	0.00137482599817627
Cc05_g00060	GSCOC_T00017022001	A0A068V5H2	Scarecrow-like protein 23		AT5G41920	-2.18274199580115	0.000212239560852004
Cc01_g04960	GSCOC_T00028573001	A0A068UNU8	ABC transporter G family member 15	GO:0016021;GO:0005524;GO:0016887	AT3G21090	-2.15154568583576	8.39099410512765e-05
Cc10_g13710	GSCOC_T00035247001	A0A068UTQ8	Protein kinase protein with adenine nucleotide alpha hydrolases-like domain	GO:0005524;GO:0004672	AT1G23540	-2.14633528703622	0.00654185442274472
Cc10_g01870	GSCOC_T00024676001	A0A068UGK3	Filament-like plant protein 4		AT1G19835	-2.13325750536335	0.000144077357042315
Cc06_g22360	GSCOC_T00017198001	A0A068V5T3	Putative uncharacterized protein			-2.13102055252437	0.00231184315088236
Cc00_g23530	GSCOC_T00009087001	A0A068VK77	Serine carboxypeptidase-like 13	GO:0004185	AT1G73310	-2.11265389271663	0.000389699125812392
Cc02_g02820	GSCOC_T00020150001	A0A068UC58	Pectinacetylesterase family protein	GO:0005618;GO:0005576;GO:0016787;GO:0071555	AT5G23870	-2.10550869930071	0.000416873433054635
Cc06_g00740	GSCOC_T00023273001	A0A068UFL4	Putative Macrophage migration inhibitory factor homolog			-2.1003482835376	0.00892846230742924
Cc11_g08270	GSCOC_T00032900001	A0A068TXN2	inorganic carbon transport protein-related	GO:0016021;GO:0016655	AT1G70760	-2.08951037991278	0.00230434941361701
Cc02_g39880	GSCOC_T00027649001	A0A068UJI7	CBL-interacting serine/threonine-protein kinase 9	GO:0005524;GO:0004674;GO:0007165	AT1G01140	-2.08020240429482	0.000142021252218445
Cc11_g00610	GSCOC_T00004222001	A0A068VCI9	Glyceraldehyde-3-phosphate dehydrogenase A, chloroplastic	GO:0051287;GO:0050661;GO:0016620;GO:0006006	AT1G12900	-2.07788338818799	0.00448953839932095
Cc01_g17770	GSCOC_T00016283001	A0A068U6J7	Photosystem II reaction center PSB28 protein, chloroplastic	GO:0009654;GO:0015979		-2.07586110393068	0.000181190175123359
Cc05_g11780	GSCOC_T00021271001	A0A068UBS1	Putative Ribosomal protein L11 methyltransferase	GO:0008276		-2.07167064092112	0.000486307756799452
Cc08_g07790	GSCOC_T00011873001	A0A068VBC7	3-ketoacyl-CoA synthase 10	GO:0005783;GO:0016021;GO:0016747;GO:0006633;GO:0009409;GO:0080167;GO:0009416	AT2G26250	-2.05861998984327	5.27452820474708e-08
Cc04_g07490	GSCOC_T00022569001	A0A068TSZ5	Duplicated homeodomain-like superfamily protein	GO:0005634;GO:0003677	AT5G08520	-2.05547401133618	0.00664886239684898
Cc06_g12610	GSCOC_T00041515001	A0A068U3Y2	Peroxiredoxin Q, chloroplastic	GO:0004601;GO:0051920		-2.04725657126796	0.000261807716847625
Cc02_g13600	GSCOC_T00029126001	A0A068TTY6	Squamosa promoter-binding protein 1	GO:0042025;GO:0005634;GO:0003677;GO:0003700;GO:0046872;GO:0009908	AT2G33810	-2.04528370912903	0.00264814494063525
Cc00_g23900	GSCOC_T00012446001	A0A068VJP6	Serine carboxypeptidase-like 18	GO:0004185	AT1G73300	-2.04336669206965	0.00606831609154836
Cc02_g04030	GSCOC_T00020306001	A0A068UAU4	EXORDIUM like 3	GO:0009505;GO:0009506;GO:0080167	AT5G51550	-2.04284419396179	5.05529088119975e-06
Cc00_g29280	GSCOC_T00011749001	A0A068VLD9	Codeine O-demethylase	GO:0046872;GO:0016491	AT1G17020	-2.03999371737507	1.75016421306284e-05
Cc03_g10910	GSCOC_T00042031001	A0A068V2B1	Cytochrome P450 71A2	GO:0020037;GO:0005506;GO:0004497;GO:0016705	AT3G48310	-2.03844442807887	0.000639101748627702
Cc10_g00410	GSCOC_T00024491001	A0A3P8MYI3	Glyceraldehyde-3-phosphate dehydrogenase B, chloroplastic	GO:0051287;GO:0050661;GO:0016620;GO:0006006	AT1G42970	-2.03395478969634	0.00141007564280803
Cc02_g14800	GSCOC_T00013900001	A0A068TKR7	Putative LRR receptor-like serine/threonine-protein kinase FLS2	GO:0016021;GO:0005524;GO:0004672		-2.03206970851552	0.00101933240230632
Cc07_g07960	GSCOC_T00040158001	A0A068U2I8	Putative uncharacterized protein			-2.03022071103591	0.00190198349216447
Cc07_g02540	GSCOC_T00039452001	A0A068U1W5	Putative Heavy metal transport/detoxification superfamily protein	GO:0046872;GO:0030001		-2.02841358934893	4.8186105890324e-05
Cc00_g18540	GSCOC_T00008824001	A0A068VIB3	Cytochrome P450 71A4	GO:0020037;GO:0005506;GO:0004497;GO:0016705	AT3G48280	-2.01192809424903	0.00035212246738674
Cc07_g05400	GSCOC_T00039811001	A0A068U1L5	homolog of Synechocystis YCF37	GO:0009535		-2.00898442651251	0.000191394514159995
Cc02_g16090	GSCOC_T00014084001	A0A068TKR4	Monothiol glutaredoxin-S2	GO:0009055;GO:0015035	AT5G18600	-1.99417743346391	0.000369918809795272
Cc06_g15000	GSCOC_T00030893001	A0A068UPM4	Putative DNA-3-methyladenine glycosylase 1	GO:0008725;GO:0006284		-1.99212233546195	0.00123963401746179
Cc02_g37510	GSCOC_T00027980001	A0A068UML9	( )-neomenthol dehydrogenase	GO:0016491	AT2G24190	-1.98863675014388	0.00264814494063525
Cc04_g09880	GSCOC_T00042519001	A0A068V2G3	Putative Heavy metal transport/detoxification superfamily protein	GO:0046872;GO:0030001	AT5G63530	-1.98339366358382	0.00822858052654715
Cc02_g07500	GSCOC_T00029931001	A0A068TVS2	Ribulose bisphosphate carboxylase/oxygenase activase 1, chloroplastic	GO:0048046;GO:0005618;GO:0009941;GO:0009535;GO:0005634;GO:0010287;GO:0010319;GO:0043531;GO:0005524;GO:0046863;GO:0042742;GO:0010150;GO:0009409;GO:0009753;GO:0009416	AT2G39730	-1.98029215614456	0.00705535164799495
Cc06_g01310	GSCOC_T00023346001	A0A068UD41	Rhodanese-like domain-containing protein 10		AT3G08920	-1.97951587788364	0.00246800557018944
Cc03_g06240	GSCOC_T00026414001	A0A068TSN9	Putative Protein of unknown function (DUF3527)			-1.97892143100139	0.00599988510748016
Cc03_g06470	GSCOC_T00026442001	A0A068TVF4	Adenine nucleotide alpha hydrolases-like superfamily protein			-1.96875177973019	0.00495560793818991
Cc01_g17350	GSCOC_T00016335001	A0A068U5S8	unknown protein; FUNCTIONS IN			-1.96651625086014	8.12615053627974e-05
Cc05_g12860	GSCOC_T00021133001	A0A068UDX9	G-type lectin S-receptor-like serine/threonine-protein kinase At4g27290	GO:0005524;GO:0004674;GO:0048544	AT4G27290	-1.95666632487896	0.000582827522064959
Cc02_g24580	GSCOC_T00028866001	A0A068ULQ5	Probable plastid-lipid-associated protein 11, chloroplastic		AT4G00030	-1.9563638665363	0.0018218600327331
Cc02_g08120	GSCOC_T00029843001	A0A068TUT5	ACT domain-containing protein		AT2G39570	-1.95204369381004	0.000369879732883233
Cc11_g10360	GSCOC_T00032588001	A0A068TZ22	30S ribosomal protein 3, chloroplastic	GO:0009570;GO:0009535;GO:0005840;GO:0003735;GO:0032544	AT1G68590	-1.94573860389213	0.000989715952154478
Cc02_g32670	GSCOC_T00001209001	A0A068VBL3	UPF0603 protein At1g54780, chloroplastic	GO:0009535;GO:0016021;GO:0031977;GO:0003993;GO:0010206	AT1G54780	-1.94043592835677	0.00212867230708788
Cc02_g00440	GSCOC_T00019824001	A0A068U8S0	rubredoxin family protein	GO:0016021		-1.93820833036609	0.000186632201643312
Cc04_g11490	GSCOC_T00037338001	A0A068UWG0	Putative unknown protein; Has 20 Blast hits to 20 proteins in 7 species			-1.91923619880694	0.00882526908699229
Cc02_g38130	GSCOC_T00027903001	A0A068UK18	Glycerol-3-phosphate acyltransferase 4	GO:0016021;GO:0016746	AT4G00400	-1.91603006308719	0.00325834052736234
Cc07_g14870	GSCOC_T00036559001	A0A068TZI7	Putative Protein CbbY	GO:0016787	AT4G39970	-1.91379437847317	6.47410581330143e-05
Cc06_g09080	GSCOC_T00041968001	A0A068U4B6	SOUL heme-binding family protein			-1.91192727587711	0.000261807716847625
Cc01_g16110	GSCOC_T00016480001	A0A068U5Y0	Putative ILI1 binding bHLH 1	GO:0046983		-1.90712851810129	0.00357130006154282
Cc05_g06630	GSCOC_T00042164001	A0A068V286	Protein STRUBBELIG-RECEPTOR FAMILY 3	GO:0016021;GO:0005524;GO:0004672		-1.90471650060479	0.00716866012199393
Cc08_g09360	GSCOC_T00017288001	A0A068V8H5	Probable peptide transporter At1g52190	GO:0016021;GO:0022857	AT1G52190	-1.90109405175965	0.00733757490144204
Cc10_g03310	GSCOC_T00024854001	A0A068UGE7	Geranylgeranyl pyrophosphate synthase, chloroplastic	GO:0016740;GO:0008299	AT4G36810	-1.89753197806769	4.32543758896204e-05
Cc02_g11930	GSCOC_T00029355001	A0A068TUS6	Putative uncharacterized protein	GO:0070300;GO:0004674;GO:0046777		-1.88919494195682	0.00450980068772597
Cc02_g17970	GSCOC_T00014329001	A0A068TP04	Protein TIC 62, chloroplastic	GO:0098807	AT3G18890	-1.88641186613309	0.000265575660660949
Cc00_g08670	GSCOC_T00006865001	A0A068VFD5	unknown protein; FUNCTIONS IN		AT5G12900	-1.88146036534673	0.00371133856798244
Cc02_g03410	GSCOC_T00020225001	A0A068UAF4	TraB family protein			-1.85930429422818	0.00214947747310636
Cc03_g09300	GSCOC_T00042688001	A0A068V3H3	Putative UDP-glycosyltransferase 75D1	GO:0008194	AT4G15550	-1.85902915998056	0.0011541605336934
Cc07_g03150	GSCOC_T00039533001	A0A068U115	Putative Protein IQ-DOMAIN 31		AT1G74690	-1.85769145744148	8.91538969841625e-05
Cc03_g08100	GSCOC_T00033202001	A0A068USC2	Probable sucrose-phosphate synthase 2	GO:0016157;GO:0046524;GO:0005985	AT1G04920	-1.85532526165625	0.000311085054078118
Cc02_g22350	GSCOC_T00014904001	A6XBK9	Probable plastid-lipid-associated protein 4, chloroplastic		AT3G26070	-1.84295175609508	0.00880650701346243
Cc03_g04120	GSCOC_T00026120001	A0A068TUR9	Putative Protein XRI1	GO:0007143;GO:0007140	AT5G48720	-1.83438321719333	0.00382479487347076
Cc00_g28280	GSCOC_T00000756001	A0A068VP61	Protein SRG1	GO:0046872;GO:0016491	AT1G17020	-1.81488388151096	7.16744065515209e-07
Cc00_g00210	GSCOC_T00036098001	A0A068UXX8	Auxin response factor 19	GO:0005634;GO:0003677;GO:0009734;GO:0006355	AT1G19220	-1.80792146712194	0.00892846230742924
Cc01_g04780	GSCOC_T00028526001	A0A068UL67	Phospholipase A1-Igamma3, chloroplastic	GO:0006629	AT1G51440	-1.80577844909073	0.00862161375399454
Cc08_g12950	GSCOC_T00030407001	A0A068UNT1	Protein YABBY 4	GO:0007275	AT2G45190	-1.80536966019206	0.000776481826723158
Cc05_g13990	GSCOC_T00038874001	A0A068UZT1	Hypothetical protein	GO:0016021		-1.78364866533729	0.00150096124856287
Cc02_g18100	GSCOC_T00014345001	A0A068TLK0	Long chain acyl-CoA synthetase 2	GO:0003824	AT1G49430	-1.77737026054964	0.00899292738361595
Cc07_g09540	GSCOC_T00037227001	A0A068U0F5	Putative Maf-like protein DDB_G0281937	GO:0047429		-1.75542961291319	0.00264814494063525
Cc07_g07950	GSCOC_T00040157001	A0A068U2E4	Serine hydroxymethyltransferase, mitochondrial	GO:0016021;GO:0004372;GO:0030170;GO:0019264;GO:0035999	AT4G37930	-1.74635722159857	0.00594714419182801
Cc00_g28270	GSCOC_T00010422001	A0A068VLL1	Putative UDP-glycosyltransferase 75C1	GO:0008194	AT4G14090	-1.7447489207468	0.0039807222530289
Cc09_g03830	GSCOC_T00017498001	A0A068U6P7	Protein TIC 20-II, chloroplastic	GO:0031969;GO:0016021	AT2G47840	-1.72287098091962	0.000139520227620132
Cc09_g08040	GSCOC_T00003802001	A0A068V9X7	Homeobox-leucine zipper protein HOX32	GO:0005634;GO:0003677;GO:0008289	AT2G34710	-1.7153132247226	0.00338181607906486
Cc01_g20190	GSCOC_T00015962001	A0A068U5H2	Putative Xanthoxin dehydrogenase	GO:0016491	AT3G51680	-1.71269478144691	0.00501807553844735
Cc07_g14880	GSCOC_T00036558001	A0A068TYZ0	UDP-glycosyltransferase 85A1	GO:0016021;GO:0008194	AT1G22400	-1.70295674304573	1.55240708826682e-05
Cc10_g02900	GSCOC_T00024799001	A0A068UG19	Hypothetical protein			-1.70114033277832	0.00599603228937097
Cc00_g03730	GSCOC_T00013259001	A0A068VBZ1	Protein SRG1	GO:0046872;GO:0016491	AT1G17020	-1.69806753469134	0.00019647551099419
Cc02_g03460	GSCOC_T00020230001	A0A068UAF9	unknown protein; FUNCTIONS IN			-1.69749041127667	0.00801532415313299
Cc07_g14180	GSCOC_T00036648001	A0A068TZ62	Putative Reticuline oxidase-like protein	GO:0071949;GO:0016491	AT4G20860	-1.69626407986395	0.00700498078709421
Cc01_g21470	GSCOC_T00004976001	A0A068V8U3	Putative uncharacterized protein		AT3G62390	-1.69573933303845	0.00288072575158886
Cc03_g16290	GSCOC_T00002098001	A0A068VEC3	50S ribosomal protein L6, chloroplastic	GO:0005840;GO:0019843;GO:0003735;GO:0006412	AT1G05190	-1.69281473580085	0.00184634748480824
Cc07_g12330	GSCOC_T00036888001	A0A068TZT3	unknown protein; FUNCTIONS IN	GO:0016021		-1.67092171836574	0.00693418742449148
Cc07_g12810	GSCOC_T00036829001	A0A068U294	Expansin-A13	GO:0005618;GO:0005576;GO:0016020;GO:0009664		-1.66587297290249	0.00264814494063525
Cc03_g02940	GSCOC_T00025967001	A0A068TRN4	Glutamine synthetase leaf isozyme, chloroplastic	GO:0048046;GO:0009941;GO:0009570;GO:0009535;GO:0022626;GO:0005739;GO:0005524;GO:0004356;GO:0006542;GO:0046686	AT5G35630	-1.65949793027104	0.00513688238985213
Cc01_g10770	GSCOC_T00024183001	A0A068UFM1	Putative Cysteine proteinases superfamily protein		AT5G04250	-1.65060547399413	0.0098876837450312
Cc04_g04380	GSCOC_T00022162001	A0A068TQ70	Palmitoyl-monogalactosyldiacylglycerol delta-7 desaturase, chloroplastic	GO:0016021;GO:0016717;GO:0006633	AT3G15850	-1.64153760922398	0.000200128869401068
Cc02_g22380	GSCOC_T00014907001	A0A068TNK3	Structural molecule, putative		AT3G26070	-1.63869833055327	0.00196653348705981
Cc08_g14210	GSCOC_T00030254001	A0A068UQB2	UDP-glucose 4-epimerase 1	GO:0003978;GO:0006012		-1.62667706889244	0.000431029239123834
Cc11_g14720	GSCOC_T00032019001	A0A068TVW4	Carbonic anhydrase, chloroplastic	GO:0004089;GO:0008270;GO:0015976	AT5G14740	-1.6256269288531	0.00205512687551858
Cc09_g06820	GSCOC_T00005141001	A0A068VAK3	Putative SBP (S-ribonuclease binding protein) family protein			-1.61188897786058	0.000112523053595322
Cc07_g12290	GSCOC_T00036895001	A0A068TZP8	Auxin efflux carrier family protein	GO:0016021;GO:0055085	AT1G20925	-1.60794504507043	0.00723340362313732
Cc04_g04950	GSCOC_T00022234001	A0A068TQN4	Putative Zinc finger protein 3		AT5G25160	-1.60679778711769	0.00861008240675783
Cc02_g35140	GSCOC_T00012344001	A0A068VK15	Chloroplast stem-loop binding protein of 41 kDa b, chloroplastic	GO:0003824	AT1G09340	-1.60318832549776	0.0069441475715727
Cc07_g02040	GSCOC_T00039384001	A0A068U1Q3	50S ribosomal protein L12, chloroplastic	GO:0005840;GO:0003735;GO:0006412	AT3G27830	-1.60018000728655	0.0029281716569609
Cc02_g35130	GSCOC_T00012343001	A0A068VMM3	PsbP domain-containing protein 1, chloroplastic	GO:0019898;GO:0009654;GO:0005509;GO:0015979	AT4G15510	-1.59412872041222	0.00466370538080766
Cc10_g05010	GSCOC_T00034863001	A0A068TYA9	Pollen-specific protein SF3	GO:0046872	AT1G10200	-1.58864041269345	0.000875805525438814
Cc10_g01790	GSCOC_T00024666001	A0A068UGS0	Protein disulfide-isomerase LQY1	GO:0016021	AT1G75690	-1.58425460099456	0.00841163950350675
Cc02_g00690	GSCOC_T00019859001	A0A068U8U0	Uncharacterized calcium-binding protein At1g02270		AT1G02270	-1.57949749565463	0.006175019877319
Cc04_g07180	GSCOC_T00022524001	A0A068TQW9	Carbon catabolite repressor protein 4 homolog 5			-1.57928226117449	0.00243201306611771
Cc00_g12270	GSCOC_T00008605001	A0A068VGT4	Putative Transcription factor ICE1	GO:0046983		-1.56644256390074	0.00801618963006016
Cc02_g13860	GSCOC_T00029087001	A0A068TTA4	Triose phosphate/phosphate translocator, chloroplastic	GO:0016021;GO:0022857	AT1G61800	-1.56131966265285	0.00792993803022152
Cc00_g26060	GSCOC_T00003724001	A0A068VKP4	Heavy metal transport/detoxification superfamily protein	GO:0046872;GO:0030001		-1.55054035374809	0.00100019708292569
Cc10_g06080	GSCOC_T00034712001	A0A068U0N9	ATP synthase delta chain, chloroplastic	GO:0009941;GO:0009535;GO:0010287;GO:0010319;GO:0046933;GO:0015986;GO:0042742;GO:0009773;GO:0009772;GO:0009409	AT4G09650	-1.5396638517889	0.0083596077715051
Cc09_g04450	GSCOC_T00017424001	A0A068U929	Coproporphyrinogen-III oxidase, chloroplastic	GO:0004109;GO:0006779	AT1G03475	-1.52180494309067	0.000753287085383437
Cc02_g19180	GSCOC_T00014482001	A0A068TMS1	stress enhanced protein 1	GO:0009535;GO:0016021;GO:0071486;GO:0071492;GO:0009611	AT4G34190	-1.52024073129931	0.00890884682337188
Cc02_g19320	GSCOC_T00014497001	A0A068TPF9	Methylthioribose kinase	GO:0046522;GO:0009086	AT1G49820	-1.51372536399714	0.000227837456537511
Cc02_g35850	GSCOC_T00042782001	A0A068V3S4	unknown protein; Has 29 Blast hits to 29 proteins in 11 species			-1.51263748129859	0.00338588574232093
Cc01_g17600	GSCOC_T00016302001	A0A068U5Q7	Hypothetical protein			-1.50893737197433	0.00676112724147664
Cc10_g07070	GSCOC_T00034570001	A0A068TYR8	Probable pectin methyltransferase QUA2	GO:0005768;GO:0016021;GO:0005802;GO:0008168;GO:0010289;GO:0032259;GO:0009735;GO:0048364;GO:0048367	AT1G78240	-1.47126221193918	0.00066301499421271
Cc02_g06640	GSCOC_T00039206001	A0A068V2A9	Protein yippee-like	GO:0046872	AT3G08990	-1.45927398641695	0.00841309408702363
Cc08_g07210	GSCOC_T00025335001	A0A068UHU8	Pentatricopeptide repeat-containing protein At4g31850, chloroplastic			-1.44835147963155	0.00596074348001213
Cc06_g08500	GSCOC_T00031124001	A0A068UPN7	DnaJ/Hsp40 cysteine-rich domain superfamily protein	GO:0101031;GO:0009570;GO:1905538;GO:0044183;GO:0061077;GO:0110102	AT3G47650	-1.42408687180412	0.00351293440127722
Cc11_g01610	GSCOC_T00019541001	A0A068UAZ7	Putative uncharacterized protein			-1.41953215348424	0.00882438419046215
Cc04_g06840	GSCOC_T00022483001	A0A068TSS7	Putative RING/U-box superfamily protein		AT5G42940	-1.40888089250356	0.00716152151177607
Cc05_g13190	GSCOC_T00021095001	A0A068UB79	Domain of unknown function (DUF1995)			-1.40280724466074	0.00861008240675783
Cc00_g32410	GSCOC_T00006083001	A0A068VMI8	Protein SRG1		AT1G17020	-1.39878937134673	0.00692221510984109
Cc02_g39890	GSCOC_T00027645001	A0A068UJA7	3-ketoacyl-CoA synthase 1	GO:0016020;GO:0016747;GO:0006633	AT1G01120	-1.37791159749709	0.00644619208331372
Cc10_g02630	GSCOC_T00024768001	A0A068UIP1	Putative Uncharacterized sugar kinase slr0537			-1.36894461443347	0.00583123537401618
Cc00_g22590	GSCOC_T00003321001	A0A068VJK8	Putative Thebaine 6-O-demethylase	GO:0046872;GO:0016491		-1.35566335347898	0.000763268283370536
Cc06_g11150	GSCOC_T00041692001	A0A068U6I4	Pentatricopeptide repeat-containing protein At2g15690	GO:0008270	AT2G15690	-1.35105742223703	0.00431096014835874
Cc00_g15490	GSCOC_T00000734001	A0A068VH16	unknown protein; FUNCTIONS IN			-1.3502759446921	0.0098876837450312
Cc01_g16760	GSCOC_T00016403001	A0A068U5R8	Oleoyl-acyl carrier protein thioesterase, chloroplastic (Fragment)	GO:0009507;GO:0016790;GO:0006633	AT3G25110	-1.34270540903828	0.0098876837450312
Cc11_g12210	GSCOC_T00032346001	A0A068TYH9	Putative Probable WRKY transcription factor 57	GO:0005634;GO:0003700;GO:0043565		-1.33164877694157	0.00444438402967649
Cc04_g04320	GSCOC_T00022156001	A0A068TPH7	Putative Tetratricopeptide repeat (TPR)-like superfamily protein	GO:0006979		-1.3007920272417	0.00199494900950363
Cc02_g04310	GSCOC_T00020342001	A0A068UAM9	Peroxisomal membrane protein 11-4	GO:0005779;GO:0016559	AT3G47430	-1.30043277447458	0.00220576109802269
Cc04_g10280	GSCOC_T00042573001	A0A068V2K4	Putative Uncharacterized aarF domain-containing protein kinase 1	GO:0005524;GO:0004672		-1.28746114506701	0.00325834052736234
Cc04_g10650	GSCOC_T00042628001	A0A068V3D1	Putative Protein CbbY	GO:0016787		-1.26512188858976	0.00817013293381227
Cc04_g03040	GSCOC_T00021991001	A0A068TRN2	30S ribosomal protein S17, chloroplastic	GO:0005840;GO:0003735;GO:0006412	AT1G79850	-1.26373690498993	0.00182188972357582
Cc08_g04460	GSCOC_T00015628001	A0A068V702	50S ribosomal protein L9, chloroplastic	GO:0005840;GO:0003735;GO:0006412		-1.26081117275124	0.00627220548089587
Cc10_g07560	GSCOC_T00034506001	A0A068TXH9	Predicted protein			-1.25279292065596	0.00281437931860111
Cc00_g23350	GSCOC_T00012066001	A0A068VK37	Putative O-acyltransferase WSD1	GO:0004144;GO:0045017		-1.25127602510922	0.00241798186487539
Cc02_g00150	GSCOC_T00019790001	A0A068U8U3	Putative Uncharacterized sugar kinase slr0537	GO:0016301;GO:0016773		-1.24808061752639	0.00771221442401246
Cc04_g07240	GSCOC_T00022534001	A0A068TSW9	Aluminum-activated malate transporter 9	GO:0016021;GO:0015743		-1.24536650112639	0.00160722794739947
Cc06_g20040	GSCOC_T00022900001	A0A068UF43	Hypothetical protein	GO:0005874;GO:0005525;GO:0003924;GO:0005200;GO:0007017	AT5G12250	-1.22933347658489	0.00833475233967244
Cc06_g10030	GSCOC_T00041839001	A0A068U432	Transcription factor bHLH68	GO:0046983		-1.22624890422736	0.00531794155029927
Cc08_g09170	GSCOC_T00017260001	A0A068V6R2	alpha/beta-Hydrolases superfamily protein	GO:0008236		-1.14531804139757	0.00730095545797647

## Sheet: Up-regulated
Gene ID	ORF Name	Uniprot acession	Protein Name	GO Terms	TAIR	Log2FC	FDR
Cc09_g07380	GSCOC_T00036269001	A0A068UWC1	Putative Reticuline oxidase-like protein	GO:0050660;GO:0016491	AT1G30760	11.1704393662218	1.72183853775109e-05
Cc10_g00760	GSCOC_T00024535001	A0A068UFR8	Putative Arabidopsis protein of unknown function (DUF241)			11.0036946340346	1.23798844136875e-10
Cc09_g07390	GSCOC_T00036268001	A0A068UVZ9	Putative Reticuline oxidase-like protein	GO:0071949;GO:0016491	AT4G20820	10.6098119357796	0.00066585271543463
Cc02_g03420	GSCOC_T00020226001	A0A068UCA4	Putative Ethylene-responsive transcription factor ERF027	GO:0005634;GO:0003677;GO:0003700	AT5G52020	10.1070937091466	2.77357412358006e-09
Cc04_g10590	GSCOC_T00042615001	A0A068V334	Putative Cytochrome P450 82A1 (Fragment)	GO:0020037;GO:0005506;GO:0016705	AT4G31970	9.8082218841873	0.00886316279581747
Cc06_g15980	GSCOC_T00030750001	A0A068UPG4	18 kDa seed maturation protein	GO:0005829;GO:0009793;GO:0009409;GO:0006970;GO:0009414	AT5G06760	9.6699412044205	3.99152261965415e-08
Cc02_g29220	GSCOC_T00004501001	A0A068VCX9	Putative Cytochrome P450 750A1	GO:0016021;GO:0020037;GO:0005506;GO:0016705	AT5G07990	9.23842758700831	1.27366822590626e-05
Cc01_g19640	GSCOC_T00016033001	A0A068U5P1	Putative Basic 7S globulin	GO:0004190		9.12491922029586	1.13586911682054e-14
Cc05_g00080	GSCOC_T00017025001	A0A068V633	Late embryogenesis abundant protein EMB564		AT2G40170	8.96072569359151	2.33693223320176e-05
Cc06_g06630	GSCOC_T00031360001	A0A068USI6	E3 ubiquitin-protein ligase PUB22	GO:0004842	AT3G52450	8.94435088132448	1.5952218016163e-07
Cc03_g15270	GSCOC_T00026800001	A0A068UHQ0	Putative Reticuline oxidase-like protein	GO:0071949;GO:0016491	AT4G20820	8.86197988935026	2.97226312774231e-06
Cc02_g24750	GSCOC_T00028846001	A0A068UPB0	Carotenoid cleavage dioxygenase 7, chloroplastic	GO:0046872;GO:0016702;GO:0016121;GO:0009733;GO:0010223;GO:1901601		8.48823743453208	2.14239126990621e-07
Cc08_g13960	GSCOC_T00030281001	A0A068UQD5	Putative Dehydration-responsive element-binding protein 1D	GO:0005634;GO:0003677;GO:0003700	AT4G25480	8.43949152414714	3.51470633713768e-05
Cc11_g10180	GSCOC_T00032611001	A0A068TWI6	3-ketoacyl-CoA synthase 6	GO:0016021;GO:0016747;GO:0006633	AT1G68530	8.38667970506533	0.000706761384964549
Cc07_g18370	GSCOC_T00018761001	A0A068U858	Predicted protein			8.38310895255318	9.37846630443227e-29
Cc05_g05900	GSCOC_T00035177001	A0A068UUA9	Putative myb domain protein 15	GO:0005634;GO:0003677	AT3G23250	8.33796348023467	0.000231311875980584
Cc00_g05510	GSCOC_T00006857001	A0A068VDT7	Putative ABC transporter B family member 9	GO:0016021;GO:0005524;GO:0016887;GO:0042626	AT4G18050	8.32600604668148	2.09171918471311e-05
Cc04_g10600	GSCOC_T00042618001	A0A068V3C4	Putative Cytochrome P450 82A3	GO:0020037;GO:0005506;GO:0004497;GO:0016705	AT4G31940	8.32040692402751	0.00035212246738674
Cc00_g01250	GSCOC_T00007186001	A0A068VBG0	Putative Cytochrome P450 71A1	GO:0020037;GO:0005506;GO:0004497;GO:0016705		8.29949900016866	0.000438609599534287
Cc02_g18120	GSCOC_T00014348001	A0A068TP21	9-divinyl ether synthase	GO:0020037;GO:0005506;GO:0016705		8.26283200390935	0.000112654183914989
Cc09_g03820	GSCOC_T00017499001	A0A068U6U4	12-oxophytodienoate reductase 1	GO:0010181;GO:0016491	AT1G76690	8.11183277366068	7.26360133823114e-20
Cc00_g15520	GSCOC_T00000738001	A0A068VKB1	Beta-fructofuranosidase, insoluble isoenzyme 1	GO:0004553;GO:0005975	AT3G52600	8.09329021091785	0.000504476430484532
Cc01_g19530	GSCOC_T00016046001	A0A068U7N4	Hypothetical protein			8.06091887523656	1.20968135221665e-07
Cc10_g08940	GSCOC_T00034320001	A0A068TXT8	alpha/beta-Hydrolases superfamily protein	GO:0006629	AT3G14360	8.01650957624254	3.97975959151813e-05
Cc10_g08590	GSCOC_T00034368001	A0A068TXW7	Putative Probable protein phosphatase 2C 74	GO:0004722	AT1G07160	7.8323276440997	0.00340606897446421
Cc02_g25790	GSCOC_T00028697001	A0A068UM94	Putative Protein WAX2	GO:0005506;GO:0016491;GO:0008610		7.78627553224709	0.00198222097569233
Cc01_g19650	GSCOC_T00016031001	A0A068U526	Eukaryotic aspartyl protease family protein	GO:0004190		7.75320811445811	1.88436791417544e-07
Cc06_g21030	GSCOC_T00034097001	A0A068UT19	Peroxidase 44	GO:0005576;GO:0020037;GO:0046872;GO:0004601;GO:0042744;GO:0006979		7.71542461155028	0.00151316106280002
Cc10_g06020	GSCOC_T00034723001	A0A068TZ49	Putative Predicted protein		AT1G15100	7.63206374010248	0.00160108158140996
Cc00_g03750	GSCOC_T00013262001	A0A068VC22	Putative ABC transporter B family member 9	GO:0016021;GO:0005524;GO:0016887;GO:0042626	AT4G18050	7.52286086920089	8.06635665806725e-05
Cc02_g03240	GSCOC_T00020200001	A0A068U9L8	CEN-like protein 1		AT5G62040	7.44635980808424	2.14374235000587e-06
Cc10_g12360	GSCOC_T00031941001	A0A068URL7	Myrcene synthase, chloroplastic	GO:0000287;GO:0010333		7.42843681881179	0.00665269197658509
Cc01_g18390	GSCOC_T00016211001	A0A068U635	Ethylene-responsive transcription factor 1B	GO:0005634;GO:0003677;GO:0003700	AT3G23240	7.39871896736194	0.000137472678177147
Cc10_g05260	GSCOC_T00034833001	A0A068TY86	Putative Isoflavone 2'-hydroxylase	GO:0016021;GO:0020037;GO:0005506;GO:0004497;GO:0016705		7.26416540078581	0.00309886589669286
Cc02_g34740	GSCOC_T00011780001	A0A068VCD7	Protein of unknown function (DUF679)	GO:0016021	AT5G46090	7.23801120972785	3.19421159818149e-11
Cc11_g04440	GSCOC_T00004789001	A0A068V8T5	Hypothetical protein	GO:0016787		7.03243896497977	0.00908606166104798
Cc00_g06380	GSCOC_T00004113001	A0A068VE40	Vetispiradiene synthase 1	GO:0000287;GO:0010333		7.01692082648626	0.000274127008775019
Cc07_g16730	GSCOC_T00037525001	A0A068UX31	DNA binding protein, putative	GO:0005634;GO:0003677;GO:0003700	AT5G64750	6.94574950918206	0.00869010935031132
Cc02_g27970	GSCOC_T00025155001	A0A068UHN2	Uncharacterized protein			6.94103139444859	6.62898604719895e-11
Cc07_g13930	GSCOC_T00036676001	A0A068TZ92	Putative UDP-rhamnose	GO:0008194	AT5G49690	6.88164284535808	5.55479090026715e-08
Cc01_g10130	GSCOC_T00024094001	A0A068UH90	Histone H2B.2	GO:0000786;GO:0005634;GO:0003677;GO:0046982	AT1G08170	6.85658664164689	3.88540938230774e-12
Cc10_g05350	GSCOC_T00034820001	A0A068TYC8	Putative Isoflavone 2'-hydroxylase	GO:0020037;GO:0005506;GO:0004497;GO:0016705		6.71233007794939	0.00106981415755891
Cc10_g08360	GSCOC_T00034397001	A0A068TXA9	unknown protein; FUNCTIONS IN	GO:0005886		6.67732660485947	8.5236855177685e-08
Cc00_g21210	GSCOC_T00009603001	A0A068VJL2	myb domain protein 108	GO:0003677	AT5G49620	6.62450127803905	0.000126623985623426
Cc07_g09470	GSCOC_T00037237001	A0A068U118	Hypothetical protein			6.61880107788797	6.48830937164699e-15
Cc04_g02360	GSCOC_T00021907001	A0A068TNP0	Inositol oxygenase 1	GO:0005737;GO:0050113;GO:0005506;GO:0019310	AT1G14520	6.52835521070176	1.59213991717419e-12
Cc02_g29550	GSCOC_T00018392001	A0A068V7I7	Putative 3-hydroxyacyl-CoA dehydratase 1	GO:0003824		6.36900468078117	4.07768841477726e-10
Cc02_g29230	GSCOC_T00004503001	A0A068VAE2	Putative Flavonoid 3'-monooxygenase	GO:0020037;GO:0005506;GO:0004497;GO:0016705	AT5G07990	6.28241851603139	6.50375325687013e-07
Cc05_g06110	GSCOC_T00009865001	A0A068VI38	Beta-amylase	GO:0102229;GO:0016161;GO:0000272	AT4G15210	6.18374853522054	0.00167588126903158
Cc01_g10050	GSCOC_T00024084001	A0A068UEK8	Agmatine coumaroyltransferase-2	GO:0016747		6.1218113817256	5.67150764639368e-05
Cc02_g35350	GSCOC_T00042862001	A0A068V3V7	Putative Uncharacterized protein R707	GO:0047216;GO:0006012	AT2G47180	6.10515766617491	4.06731778828266e-22
Cc10_g04430	GSCOC_T00034935001	A0A068U146	Putative Patatin group A-3	GO:0016787;GO:0016042	AT2G26560	6.08262608998193	1.26664588545542e-17
Cc07_g10030	GSCOC_T00037166001	Q1A524	Dehydrin DH1a	GO:0009415	AT3G50980	6.07103424716363	2.13384508134902e-12
Cc01_g08700	GSCOC_T00023904001	A0A068UE89	Momilactone A synthase		AT1G52340	6.06479443675503	1.70896709127875e-18
Cc08_g16010	GSCOC_T00035549001	A0A068UUR7	Putative highly ABA-induced PP2C gene 2	GO:0046872;GO:0004722	AT5G59220	5.96997663244858	4.27901403797358e-10
Cc00_g01970	GSCOC_T00000819001	A0A068V9V7	Putative Protein TIFY 5A		AT1G30135	5.86533089624857	6.96655219672781e-05
Cc02_g21350	GSCOC_T00014775001	A0A068TMG4	Putative UDP-glycosyltransferase 85A3	GO:0008194	AT1G22360	5.76031015858066	3.49576992710775e-12
Cc04_g07150	GSCOC_T00022521001	A0A068TR51	Hypothetical protein			5.60588875070272	7.06072596624863e-06
Cc02_g11550	GSCOC_T00029398001	A0A068TUN9	Tryptophan synthase beta chain 2, chloroplastic	GO:0004834	AT4G27070	5.5805483420162	8.85843556319856e-09
Cc00_g04980	GSCOC_T00005519001	A0A3P8MYP6	Hypothetical protein			5.52668512628351	1.09200352133098e-14
Cc03_g06560	GSCOC_T00026456001	A0A068TTG3	Putative Transcription factor MYB48	GO:0003677	AT5G59780	5.52501199562897	1.37692267243987e-05
Cc00_g20820	GSCOC_T00008930001	A0A068VIV2	Hypothetical protein			5.47682357814158	2.2857224078651e-11
Cc01_g04030	GSCOC_T00040852001	A0A068V1N7	Putative G-type lectin S-receptor-like serine/threonine-protein kinase RLK1	GO:0005524;GO:0004672;GO:0048544	AT1G34300	5.46637609531531	0.000302115439742026
Cc05_g12500	GSCOC_T00021185001	A0A068UCE6	NAC domain-containing protein 72	GO:0005634;GO:0003677;GO:0006355	AT3G15500	5.44198903027256	6.82973118125939e-33
Cc10_g08670	GSCOC_T00034360001	A0A068TY95	Putative Protein of unknown function (DUF1442)			5.36695661427093	6.79105376570758e-05
Cc02_g13430	GSCOC_T00029158001	A0A068TU92	Putative Predicted protein			5.35621273510776	4.29954637815619e-08
Cc04_g07360	GSCOC_T00022550001	A0A068TQ54	Putative Protein ASPARTIC PROTEASE IN GUARD CELL 1	GO:0004190;GO:0009737;GO:0009414	AT3G18490	5.23664062901587	1.86713331224599e-19
Cc04_g14100	GSCOC_T00035937001	A0A068UVS7	Putative Probable inactive poly [ADP-ribose] polymerase SRO5	GO:0003950	AT5G62520	5.18584655844594	0.000598882915314556
Cc01_g14390	GSCOC_T00028437001	A0A068ULS1	PHD finger transcription factor, putative	GO:0046872;GO:0008080		5.18377404434106	0.00644619208331372
Cc02_g39250	GSCOC_T00027744001	A0A068UKH5	Long chain acyl-CoA synthetase 4	GO:0003824	AT4G23850	5.17781974194675	0.00291426045520977
Cc02_g20300	GSCOC_T00014641001	A0A068TM85	Pathogenesis-related leaf protein 4	GO:0005576	AT2G14580	5.10524221786725	1.74579374625051e-05
Cc05_g13870	GSCOC_T00021007001	A0A068UBW5	Putative Protein of unknown function, DUF584	GO:0009506		5.04132536882433	0.000261807716847625
Cc02_g35340	GSCOC_T00042863001	A0A068V5V2	Putative UDP-glucuronate	GO:0047216;GO:0006012	AT2G47180	5.0196933695348	1.18058591420829e-15
Cc01_g13400	GSCOC_T00028306001	A0A068UNB2	Protein phosphatase 2C 37	GO:0046872;GO:0004722	AT2G29380	5.01929020219258	6.2255767080273e-12
Cc02_g11470	GSCOC_T00029408001	A0A068TTX8	Serine carboxypeptidase-like 27	GO:0004185	AT3G07990	4.99518521425486	4.35162095836537e-05
Cc10_g15100	GSCOC_T00033677001	A0A068USL3	Putative uncharacterized protein	GO:0005634;GO:0003677;GO:0003700	AT5G64750	4.96589660488411	5.03114617965617e-05
Cc01_g07420	GSCOC_T00030179001	A0A068UMS9	Alcohol dehydrogenase-like 7	GO:0016491;GO:0008270	AT5G42250	4.96053205261652	2.02141867298312e-16
Cc02_g11220	GSCOC_T00029439001	A0A068TTZ6	Transketolase, chloroplastic	GO:0004802	AT3G60750	4.95877486179439	1.11382940511941e-08
Cc01_g12160	GSCOC_T00028141001	A0A068UL59	Putative exocyst subunit exo70 family protein H7	GO:0000145;GO:0006887;GO:0015031	AT3G55150	4.95162005165379	8.62060414968499e-05
Cc02_g19470	GSCOC_T00014515001	A0A068TPG8	Indole-3-acetic acid-amido synthetase GH3.3		AT2G23170	4.9124183436048	0.00243201306611771
Cc00_g03120	GSCOC_T00003068001	A0A068VAQ6	Putative Annexin D4	GO:0005509;GO:0005544	AT2G38750	4.82848975033826	5.9908742689138e-08
Cc08_g16730	GSCOC_T00035644001	A0A068UX94	Protein of unknown function, DUF538			4.80328632342596	0.000238598058927562
Cc06_g03920	GSCOC_T00023692001	A0A068UE60	Putative uncharacterized protein			4.74513583901474	1.50163277777757e-05
Cc01_g09030	GSCOC_T00023944001	A0A068UGX8	Hypothetical protein	GO:0016021		4.72268152107073	6.05459646560388e-08
Cc10_g06840	GSCOC_T00034605001	A0A068TYG6	Phosphate-responsive 1 family protein		AT4G08950	4.70797847781104	0.000325310447868355
Cc05_g04680	GSCOC_T00007009001	A0A068VFT8	L-ascorbate oxidase homolog	GO:0005507;GO:0016491	AT4G12420	4.66103292661271	3.71242533532395e-06
Cc01_g21240	GSCOC_T00005004001	A0A068V9A2	Putative unknown protein; FUNCTIONS IN			4.63179796988064	6.36775166980191e-06
Cc00_g11660	GSCOC_T00004163001	A0A068VGK6	Pathogenesis-related protein P2	GO:0042742;GO:0050832	AT3G04720	4.62954890259136	3.50466880383722e-12
Cc04_g04040	GSCOC_T00022121001	A0A068TRZ8	Late embryogenesis abundant protein Dc3		AT1G52690	4.62630557386767	6.74295749739974e-06
Cc02_g11510	GSCOC_T00029403001	Q98IV5	MLO-like protein 6	GO:0016021;GO:0005516;GO:0006952;GO:0009607	AT1G61560	4.61116867458275	8.5236855177685e-08
Cc11_g01380	GSCOC_T00019574001	A0A068U8M8	Putative unknown protein; FUNCTIONS IN			4.58077809064993	2.23972114243182e-09
Cc01_g07410	GSCOC_T00030177001	A0A068UMJ3	Alcohol dehydrogenase-like 7	GO:0016491;GO:0008270	AT5G42250	4.57425204229016	1.06824586998418e-11
Cc02_g13580	GSCOC_T00029130001	A0A068TU76	Putative Late embryogenesis abundant protein (LEA) family protein			4.5740763264969	0.000275650305685107
Cc04_g05250	GSCOC_T00022272001	A0A068TQP9	Heat shock 70 kDa protein	GO:0005524	AT3G12580	4.54646487787986	5.58082381420911e-09
Cc02_g26920	GSCOC_T00025001001	A0A068UHF8	Putative uncharacterized protein	GO:0016021		4.54355024517843	9.11148533741587e-11
Cc01_g00040	GSCOC_T00012436001	A0A068VDF3	Benzyl alcohol O-benzoyltransferase	GO:0016747	AT3G03480	4.52990966394342	1.34902371623334e-10
Cc02_g17700	GSCOC_T00014292001	A0A068TLF1	Putative unknown seed protein like 1			4.49580584812942	3.36819657117664e-08
Cc02_g17270	GSCOC_T00014237001	Q1A522	Putative Late embryogenesis abundant protein	GO:0005829;GO:0009415	AT2G21490	4.49330192053993	0.00103260246195921
Cc07_g14740	GSCOC_T00036573001	A0A068TYW8	Peroxidase 17	GO:0005829;GO:0005576;GO:0009505;GO:0020037;GO:0046872;GO:0004601;GO:0042744;GO:0009809;GO:0006979;GO:0010228	AT2G22420	4.47832943349623	4.51035765157675e-05
Cc08_g16780	GSCOC_T00035651001	A0A068UX97	Putative uncharacterized protein	GO:0005634;GO:0043565;GO:0006355	AT2G46680	4.47389786334513	1.26885342843011e-23
Cc01_g17750	GSCOC_T00016287001	A0A068U5P6	Putative uncharacterized protein	GO:0016021		4.46757245908899	0.00156546977892192
Cc03_g03470	GSCOC_T00026033001	A0A068TUK1	Putative unknown protein; BEST Arabidopsis thaliana protein match is			4.45695274474096	7.3705928154015e-07
Cc06_g18280	GSCOC_T00040435001	A0A068V2W8	Glucan endo-1,3-beta-glucosidase, acidic isoform PR-Q'	GO:0004553;GO:0005975	AT4G16260	4.44866620262556	2.72251044669767e-28
Cc01_g12850	GSCOC_T00028236001	A0A068UN50	Metallothionein 1 (Fragment)	GO:0046872	AT5G02380	4.43407272541656	0.000451815293713776
Cc11_g14010	GSCOC_T00032115001	A0A068TY24	Probable galacturonosyltransferase-like 9	GO:0016021;GO:0016757	AT1G70090	4.42893559998902	1.45956720320669e-08
Cc05_g08100	GSCOC_T00016821001	A0A068V5V7	unknown protein; FUNCTIONS IN	GO:0016021	AT2G31090	4.42877148277499	0.000295441719232958
Cc06_g04680	GSCOC_T00042986001	A0A068V3S3	UDP-glycosyltransferase 73D1	GO:0008194	AT3G53150	4.42522625510609	1.58593933363092e-05
Cc04_g12840	GSCOC_T00003258001	A0A068VDL8	Putative U-box domain-containing protein 19	GO:0004842	AT1G60190	4.39333334466985	1.9583717291094e-13
Cc03_g04970	GSCOC_T00026229001	A0A068TV46	Inhibitor of trypsin and hageman factor	GO:0004867;GO:0009611		4.37513977995867	0.000890670785325523
Cc04_g07380	GSCOC_T00022554001	A0A068TQZ0	Putative Protein ASPARTIC PROTEASE IN GUARD CELL 1	GO:0004190;GO:0009737;GO:0009414	AT3G18490	4.35239407049992	1.12922661431552e-09
Cc07_g08370	GSCOC_T00040209001	A0A068U377	Putative unknown protein; FUNCTIONS IN			4.32499060437748	3.83727597218055e-06
Cc09_g10000	GSCOC_T00041102001	A0A068V3W7	Putative Protein of unknown function, DUF584			4.32107455670853	3.54052161459866e-05
Cc02_g13110	GSCOC_T00029199001	A0A068TTI1	Putative Stem-specific protein TSJT1			4.2767521254331	6.47410581330143e-05
Cc01_g08270	GSCOC_T00015527001	A0A068V6R7	Alcohol dehydrogenase-like 7	GO:0016491;GO:0008270	AT5G42250	4.27596829758775	0.000364371461545248
Cc02_g25740	GSCOC_T00028706001	A0A068UM98	Putative Phosphorylated carbohydrates phosphatase TM_1254	GO:0016787	AT2G38740	4.26968717987248	3.09121941441476e-12
Cc06_g08250	GSCOC_T00031154001	A0A068UPR3	Putative Early nodulin-like protein 1	GO:0009055	AT5G20230	4.26370561444718	0.00066585271543463
Cc02_g36920	GSCOC_T00003856001	A0A068VAL1	Hypothetical protein			4.25959057211613	0.0069441475715727
Cc06_g02310	GSCOC_T00023485001	A0A068UDD8	Putative Protein of unknown function (DUF668)	GO:0045927		4.23494054739581	0.000879147520720666
Cc04_g03290	GSCOC_T00022022001	A0A068TRQ8	Putative Acid phosphatase 1		AT5G24780	4.19927857000716	4.08518900498238e-08
Cc00_g17550	GSCOC_T00012275001	A0A068VIB0	Peroxidase 3	GO:0005576;GO:0020037;GO:0046872;GO:0004601;GO:0042744;GO:0006979	AT1G05260	4.19828288903648	4.1680037455301e-06
Cc00_g15700	GSCOC_T00006886001	A0A068VKD9	Putative Monoglyceride lipase			4.1740769784298	8.15340846726346e-12
Cc03_g04820	GSCOC_T00026212001	A0A068TV08	Basic helix-loop-helix protein	GO:0046983	AT5G43650	4.17118749971443	3.90239673636901e-05
Cc11_g11230	GSCOC_T00032472001	A0A068TW65	Putative uncharacterized protein			4.15242615247825	0.0015072315526135
Cc00_g25930	GSCOC_T00006248001	A0A068VKN2	Phosphate-responsive 1 family protein		AT4G08950	4.14402462227742	0.000107897897010814
Cc02_g00930	GSCOC_T00019895001	A0A068U9X5	Putative uncharacterized protein	GO:0005634;GO:0005524;GO:0032502;GO:0006355;GO:0006351	AT4G37740	4.12773880278502	7.38944466077016e-06
Cc06_g03160	GSCOC_T00023591001	A0A068UDN4	exocyst subunit exo70 family protein H4	GO:0000145;GO:0006887;GO:0015031	AT3G55150	4.08866614355232	3.24411159023231e-06
Cc02_g18840	GSCOC_T00014441001	A0A068TLL3	Putative uncharacterized protein			4.07386240082253	3.00163012123879e-08
Cc03_g02620	GSCOC_T00025917001	A0A068TUB6	inosine-uridine preferring nucleoside hydrolase family protein			4.06090905183859	2.27851708124195e-12
Cc06_g16520	GSCOC_T00030679001	A0A068UNG8	Hypothetical protein	GO:0016021		4.0406073527649	4.56796787667699e-06
Cc07_g00660	GSCOC_T00019144001	A0A068VAL9	Calcium-binding protein CML38	GO:0005509	AT1G76650	4.01820767957234	0.00280310530308179
Cc04_g08100	GSCOC_T00022658001	A0A068TRF5	Tropinone reductase homolog At1g07440	GO:0016491	AT5G06060	3.98499768176623	8.74883080101594e-05
Cc05_g15260	GSCOC_T00038712001	A0A068UYV9	RING/U-box superfamily protein	GO:0016021	AT1G22500	3.98311796648768	5.61008526333029e-06
Cc06_g10620	GSCOC_T00041755001	A0A068U437	Putative oxidative stress 3			3.97044629113068	5.26823341387574e-06
Cc05_g00090	GSCOC_T00017027001	A0A068V7Z0	unknown protein; BEST Arabidopsis thaliana protein match is			3.95003350942861	4.40598241461955e-09
Cc06_g13410	GSCOC_T00041401001	A0A068U3Q5	Xyloglucan endotransglucosylase/hydrolase protein 22	GO:0048046;GO:0005618;GO:0004553;GO:0016762;GO:0042546;GO:0071555;GO:0010411	AT5G57560	3.92984097081966	1.42479605401637e-10
Cc01_g20130	GSCOC_T00015970001	A0A068U7G8	Hypothetical protein			3.92948471756131	0.00159758050520447
Cc08_g15340	GSCOC_T00035463001	A0A068UUY7	Putative Protein LURP-one-related 17		AT5G41590	3.90677465964842	0.00531928034957445
Cc11_g08920	GSCOC_T00032811001	A0A068TXI8	unknown protein; BEST Arabidopsis thaliana protein match is	GO:0016021		3.89471787950807	0.00906522539122596
Cc05_g11470	GSCOC_T00021311001	A0A068UCH1	Putative sodium/calcium exchanger family protein / calcium-binding EF hand family protein	GO:0016021;GO:0005509;GO:0055085		3.8783339423828	2.29155743485931e-08
Cc04_g02600	GSCOC_T00021935001	A0A068TPW8	Pleiotropic drug resistance protein 12	GO:0016021;GO:0005524;GO:0016887	AT1G59870	3.87088004719507	0.00655986858259696
Cc01_g14440	GSCOC_T00028443001	A0A068ULS4	Putative uncharacterized protein	GO:0005524;GO:0004672	AT2G32510	3.86653944096678	0.00762275230842692
Cc02_g12550	GSCOC_T00029269001	A0A068TUC2	Putative Protein of unknown function (DUF761)	GO:0016021		3.85310150002189	2.14930121886227e-12
Cc02_g22890	GSCOC_T00014967001	A0A068TML3	COBRA-like protein 6	GO:0031225;GO:0010215	AT1G09790	3.84551424150474	0.000102761035935409
Cc06_g11710	GSCOC_T00041624001	A0A068U4A2	unknown protein; BEST Arabidopsis thaliana protein match is			3.84491578591392	2.65136581731469e-05
Cc09_g04290	GSCOC_T00017445001	A0A068U7I2	Acetolactate synthase small subunit	GO:0009507;GO:0005829;GO:0005777;GO:1990610;GO:0043621;GO:0006551;GO:0009099	AT2G31810	3.82536540300805	8.7816633180777e-06
Cc02_g33320	GSCOC_T00015359001	A0A068V4P9	Probable linoleate 9S-lipoxygenase 5	GO:0046872;GO:0016702;GO:0031408	AT1G55020	3.8236682953968	0.000495237192638478
Cc02_g06430	GSCOC_T00039176001	A0A068V0C2	Putative Leucoanthocyanidin dioxygenase	GO:0046872;GO:0016491	AT5G05600	3.79856099463643	0.000181905177080646
Cc07_g04990	GSCOC_T00039760001	A0A068U2I9	Probable isoprenylcysteine alpha-carbonyl methylesterase ICMEL2	GO:0016021;GO:0016787	AT3G02410	3.78666855199224	1.57848857178621e-08
Cc01_g00370	GSCOC_T00013679001	A0A068VNW8	Benzyl alcohol O-benzoyltransferase	GO:0016747	AT3G03480	3.76851529122542	5.06473192195803e-07
Cc08_g15400	GSCOC_T00035469001	A0A068UU68	Putative Late embryogenesis abundant (LEA) hydroxyproline-rich glycoprotein family	GO:0016021		3.74703663267427	3.27061066569395e-05
Cc09_g09980	GSCOC_T00041104001	A0A068V1B2	Bidirectional sugar transporter SWEET2a	GO:0016021;GO:0005886;GO:0008643	AT3G14770	3.73215933295941	7.76075238284486e-07
Cc10_g14970	GSCOC_T00033656001	A0A068UUV3	Hypothetical protein	GO:0016021		3.7131251435409	1.20743748147907e-08
Cc10_g02590	GSCOC_T00024764001	A0A068UGZ6	Glucose-1-phosphate adenylyltransferase large subunit, chloroplastic/amyloplastic	GO:0009507;GO:0005524;GO:0008878;GO:0005978;GO:0019252	AT1G27680	3.6746619315334	5.35696886275501e-19
Cc01_g19020	GSCOC_T00016112001	A0A068U6A9	Heat stress transcription factor A-6b	GO:0042025;GO:0005634;GO:0003700;GO:0043565	AT3G22830	3.66166894414476	0.000124434602260374
Cc02_g01010	GSCOC_T00019909001	A0A068U9M6	Putative Homeobox-leucine zipper protein ATHB-7	GO:0005634;GO:0043565;GO:0006355	AT2G46680	3.65529579705016	1.08711559867447e-16
Cc10_g01560	GSCOC_T00024633001	A0A068UFY5	Thaumatin-like protein 1		AT5G38280	3.64384415422083	0.000224226538879783
Cc07_g07330	GSCOC_T00040079001	A0A068U4U6	Putative basic leucine-zipper 6	GO:0003700	AT1G75390	3.60818889868275	0.006689051802886
Cc06_g12500	GSCOC_T00041530001	A0A068U610	Putative Protein TIFY 10A		AT1G19180	3.57987399952	1.70476338646429e-10
Cc06_g19200	GSCOC_T00028972001	A0A068UMT2	Transmembrane amino acid transporter family protein	GO:0016021	AT2G41190	3.55885534493437	4.63974273369083e-06
Cc05_g01900	GSCOC_T00015780001	A0A068V796	Putative Uncharacterized membrane protein At3g27390	GO:0016021	AT3G27390	3.52469252508413	5.76033847517255e-08
Cc06_g08070	GSCOC_T00031178001	A0A068UQA6	Probable galactinol--sucrose galactosyltransferase 6	GO:0009507;GO:0009506;GO:0003824;GO:0003729;GO:0009409;GO:0080167;GO:0006979	AT3G57520	3.52274816349149	1.43755995104291e-09
Cc06_g11590	GSCOC_T00041639001	A0A068U4S1	calmodulin-binding family protein		AT5G57010	3.49827440351542	9.11316682220607e-05
Cc03_g03600	GSCOC_T00026053001	A0A068TS01	Putative Uncharacterized protein C24B11.05	GO:0016787		3.49098528685653	2.95690386314654e-05
Cc02_g18620	GSCOC_T00014412001	A0A068TP77	Putative Probable carboxylesterase 7	GO:0016787	AT2G03550	3.49093162745679	1.12270686228488e-10
Cc08_g11890	GSCOC_T00030559001	A0A068UN96	Oleosin Bn-III	GO:0016021;GO:0012511	AT4G25140	3.46609482372921	0.00106240457829249
Cc06_g16930	GSCOC_T00004149001	A0A068VCV4	Transcription factor	GO:0016602;GO:0003677;GO:0003700	AT1G30500	3.44710993601734	0.000819317581802609
Cc04_g11330	GSCOC_T00037304001	A0A068UW23	Putative protein kinase family protein / peptidoglycan-binding LysM domain-containing protein	GO:0016021;GO:0005524;GO:0004672		3.43021729083754	6.21980871653449e-05
Cc08_g02570	GSCOC_T00037734001	A0A068UX51	unknown protein; Has 39 Blast hits to 39 proteins in 10 species			3.42639178476965	0.00243201306611771
Cc08_g09520	GSCOC_T00026893001	A0A068UI56	Dehydration-responsive element-binding protein 3	GO:0005634;GO:0003677;GO:0003700	AT5G11590	3.38958745638021	5.62313889515961e-05
Cc04_g05080	GSCOC_T00022253001	A0A068TQF4	Probable WRKY transcription factor 40	GO:0005634;GO:0003700;GO:0043565	AT1G80840	3.37464792648529	9.36951384983556e-05
Cc05_g12520	GSCOC_T00021180001	A0A068UC67	Hypothetical protein			3.37377463681099	0.00216729599955717
Cc10_g07300	GSCOC_T00034540001	A0A068TXQ7	Annexin D1	GO:0005509;GO:0005544;GO:0004377	AT1G35720	3.37287925560255	2.85174980494135e-06
Cc04_g10090	GSCOC_T00042546001	A0A068V2X5	Putative unknown protein; BEST Arabidopsis thaliana protein match is			3.36889424425422	5.67150764639368e-05
Cc06_g14110	GSCOC_T00041300001	A0A068U3J2	tetraspanin8	GO:0016021	AT2G23810	3.36596225060035	2.30712291706495e-15
Cc00_g14920	GSCOC_T00001123001	A0A068VK52	Germin-like protein 1-2	GO:0048046;GO:0005618;GO:0030145;GO:0045735	AT1G18970	3.35327923524424	0.00471773000555712
Cc00_g05500	GSCOC_T00006856001	A0A068VGA1	Hypothetical protein	GO:0016021;GO:0005524	AT4G18050	3.34080506286503	3.11311955426375e-07
Cc00_g33450	GSCOC_T00007482001	A0A068VN17	Hypothetical protein			3.33436863529494	0.00359725159802742
Cc10_g05650	GSCOC_T00034783001	A0A068TYA8	Zinc finger protein ZAT10		AT1G27730	3.33155604379829	1.71736415593104e-07
Cc07_g05600	GSCOC_T00039837001	A0A068U1N2	Polyneuridine-aldehyde esterase		AT2G23620	3.31721721438924	2.71071384756578e-12
Cc10_g07470	GSCOC_T00034517001	A0A068TYM7	Putative Uncharacterized WD repeat-containing protein alr3466	GO:0016021		3.31552869998972	3.51345872998792e-06
Cc06_g16940	GSCOC_T00004150001	A0A068VD56	Hypothetical protein			3.30482874255902	0.00173339510824897
Cc07_g13370	GSCOC_T00036751001	A0A068U016	Putative myb domain protein 43	GO:0005634;GO:0003677	AT1G66230	3.30384912654347	0.00321349091500591
Cc04_g06360	GSCOC_T00022422001	A0A068TPW5	Calcium-binding allergen Ole e 8	GO:0005509	AT1G18210	3.29211838316932	0.00233961112243998
Cc11_g11030	GSCOC_T00032492001	A0A068TW85	Putative uncharacterized protein		AT2G04240	3.28970551544434	0.0007338015814029
Cc02_g08150	GSCOC_T00029839001	A0A068TVI8	delta(3), delta(2)-enoyl CoA isomerase 1	GO:0003824	AT1G65520	3.28526060538077	9.56732090131236e-08
Cc00_g11670	GSCOC_T00004164001	A0A068VJ77	Pathogenesis-related protein P2	GO:0042742;GO:0050832	AT3G04720	3.28525494010121	1.67401518566565e-06
Cc02_g37700	GSCOC_T00027954001	A0A068UKT2	Putative uncharacterized protein			3.27878109754102	0.00797264332177849
Cc07_g13110	GSCOC_T00036787001	A0A068U241	Putative Ethylene-responsive transcription factor 15	GO:0005634;GO:0003677;GO:0003700	AT3G23240	3.26240636993157	7.52996894411712e-07
Cc09_g08710	GSCOC_T00020848001	A0A068UDF5	Putative Uncharacterized membrane protein C24H6.13	GO:0009941;GO:0016021;GO:0005886;GO:0009506;GO:0005774	AT1G30360	3.23810191361698	4.61469453193727e-08
Cc04_g00860	GSCOC_T00021712001	A0A068TN99	Sucrose synthase	GO:0016157;GO:0005985	AT3G43190	3.22988249221432	0.00404779185289486
Cc01_g11900	GSCOC_T00028106001	A0A068UMV9	Probable serine/threonine-protein kinase RLCKVII	GO:0005524;GO:0004674	AT5G02800	3.22674511207298	9.25941174796944e-07
Cc03_g04200	GSCOC_T00026129001	A0A068TS74	Putative uncharacterized protein			3.21199292348205	3.02724660050863e-07
Cc10_g04110	GSCOC_T00034975001	A0A068TYJ4	Putative cold regulated gene 27			3.20181122588388	1.90229887171726e-06
Cc09_g10840	GSCOC_T00040996001	Q07351	Monosaccharide-sensing protein 2	GO:0016021;GO:0022857;GO:0016021;GO:0022857;GO:0008643	AT4G35300	3.2001766618555	0.000130841900907042
Cc00_g04970	GSCOC_T00005517001	A0A068VCC7	Hypothetical protein			3.19491921582199	3.25855112860021e-07
Cc07_g04870	GSCOC_T00039748001	A0A068U231	Proline dehydrogenase 2, mitochondrial	GO:0004657;GO:0006562	AT5G38710	3.19333149665544	0.000517009706503446
Cc00_g34520	GSCOC_T00012632001	A0A068VMZ4	Benzyl alcohol O-benzoyltransferase	GO:0016747	AT3G03480	3.1462142634394	0.000158923508833433
Cc11_g17220	GSCOC_T00038282001	A0A068UY71	unknown protein; BEST Arabidopsis thaliana protein match is	GO:0016021		3.14086243292489	9.331000567121e-07
Cc08_g07970	GSCOC_T00007309001	A0A068VEG0	Hypothetical protein			3.12664028604861	6.50375325687013e-07
Cc06_g13940	GSCOC_T00041327001	A0A068U410	EG45-like domain containing protein		AT4G30380	3.10069027487548	2.94699338054144e-05
Cc07_g11100	GSCOC_T00037039001	A0A068U108	Heavy metal-associated isoprenylated plant protein 26	GO:0046872;GO:0030001	AT5G66110	3.0888150165396	0.00066301499421271
Cc02_g03520	GSCOC_T00020237001	A0A068UCB0	peptidoglycan-binding LysM domain-containing protein	GO:0016021		3.08781683196386	2.52534814241035e-07
Cc03_g14330	GSCOC_T00031831001	A0A068UQR4	Hypothetical protein			3.08561702523221	0.00212601160357275
Cc07_g04270	GSCOC_T00039679001	A0A068U1Y8	Putative Ninja-family protein AFP3	GO:0007165	AT3G29575	3.08560055457663	2.81326519476182e-10
Cc02_g38650	GSCOC_T00027834001	A0A068UKL6	Putative Late embryogenesis abundant (LEA) hydroxyproline-rich glycoprotein family	GO:0016021;GO:0005886		3.06742302670326	1.68251128703503e-05
Cc06_g13950	GSCOC_T00041325001	A0A068U5L0	EG45-like domain containing protein		AT4G30380	3.05918102042501	0.00603007537269408
Cc08_g12330	GSCOC_T00030498001	A0A068UNE8	Putative Metalloendoproteinase 1	GO:0031012;GO:0004222;GO:0008270	AT2G45040	3.04105329300612	0.00865358705955579
Cc03_g07470	GSCOC_T00026599001	A0A068TVQ6	Putative F-box protein At2g02240		AT2G02360	3.04009014817634	0.00294690538356646
Cc11_g11930	GSCOC_T00032381001	A0A068TVZ8	Putative Ninja-family protein AFP2	GO:0007165	AT3G29575	3.03266006223885	1.30896529627913e-08
Cc10_g06230	GSCOC_T00034687001	A0A068U0M0	Laccase-14	GO:0048046;GO:0005507;GO:0052716;GO:0046274	AT5G09360	3.02317763118385	3.80003568722881e-09
Cc11_g09100	GSCOC_T00032782001	A0A068TXV1	Putative unknown protein; FUNCTIONS IN			3.01666459477711	0.00102075723596179
Cc09_g07440	GSCOC_T00036257001	A0A068UVZ5	Reticuline oxidase-like protein	GO:0071949;GO:0016491	AT4G20840	3.01157918759372	1.19028564542391e-09
Cc06_g13830	GSCOC_T00041341001	A0A068U2Y8	Probable alpha,alpha-trehalose-phosphate synthase [UDP-forming] 11	GO:0005829;GO:0005739;GO:0003824;GO:0005992	AT2G18700	3.01074878743265	2.91537872561196e-06
Cc06_g06450	GSCOC_T00031381001	A0A068UQA2	Putative NDR1/HIN1-like 2	GO:0016021	AT5G06320	2.98457417507511	0.000295436145198628
Cc08_g06080	GSCOC_T00024434001	A0A068UGD0	Putative unknown protein; LOCATED IN	GO:0016021		2.97335622550782	0.0020636403340336
Cc02_g11090	GSCOC_T00029455001	A0A068TWP6	Probable receptor-like protein kinase At5g15080	GO:0005524;GO:0004672	AT3G09830	2.96926560005553	3.5455671295849e-05
Cc03_g01720	GSCOC_T00025794001	A0A068TU26	UDP-glucuronic acid decarboxylase 1		AT3G62830	2.96258897594495	2.54842338890607e-08
Cc05_g07590	GSCOC_T00016753001	A0A068V7H9	Ethylene-responsive transcription factor 4	GO:0005634;GO:0003677;GO:0003700	AT5G44210	2.9589106516062	0.000234228692092278
Cc02_g14480	GSCOC_T00013859001	A0A068TLF5	unknown protein; FUNCTIONS IN	GO:0016021		2.9555114425829	0.000533635658927796
Cc00_g13050	GSCOC_T00010498001	A0A068VGY0	Glutamate dehydrogenase A	GO:0000166;GO:0016639;GO:0006520	AT5G07440	2.95373180130356	1.77490601049673e-07
Cc05_g12750	GSCOC_T00021150001	A0A068UCC4	Protein of unknown function (DUF1223)			2.95249503661954	0.00055949867135775
Cc06_g19190	GSCOC_T00028971001	A0A068UPK0	Putative Vesicular GABA transporter	GO:0016021	AT2G41190	2.94493679420669	2.5835677182365e-07
Cc10_g02080	GSCOC_T00024704001	A0A068UII2	PLC-like phosphodiesterases superfamily protein	GO:0008081;GO:0006629		2.93943247443006	5.45400743437705e-11
Cc04_g03300	GSCOC_T00022023001	A0A068TQ49	Putative Acid phosphatase 1		AT5G24780	2.93906638409163	0.000337398019491586
Cc06_g01870	GSCOC_T00023424001	A0A068UDG2	PAR1 protein			2.93874575593073	0.000160393495400893
Cc01_g20660	GSCOC_T00015906001	A0A068U4L8	Putative Translocator protein homolog	GO:0016021	AT2G47770	2.93098770732831	0.00160654340040523
Cc02_g13700	GSCOC_T00029111001	A0A068TTX6	Putative Ethylene-responsive transcription factor 4	GO:0005634;GO:0003677;GO:0003700	AT5G44210	2.91916725939971	1.84153620894726e-07
Cc11_g04420	GSCOC_T00004786001	A0A068V847	Hypothetical protein			2.91578462010247	0.00885429702152231
Cc04_g14210	GSCOC_T00035952001	A0A068UXQ5	Probable boron transporter 2	GO:0016021;GO:0005452	AT3G62270	2.9095384371663	1.62231288422456e-05
Cc03_g03550	GSCOC_T00026046001	A0A068TRZ4	Sugar transport protein 13	GO:0016021;GO:0022857	AT5G26340	2.90349855561823	0.000127904177579279
Cc08_g03420	GSCOC_T00010771001	A0A068VCF6	Putative uncharacterized protein			2.90339223346552	1.10236008076232e-10
Cc05_g01770	GSCOC_T00015755001	A0A068V4Q8	Eukaryotic aspartyl protease family protein	GO:0004190	AT3G18490	2.88339576312373	0.00253727806274551
Cc07_g04940	GSCOC_T00039755001	A0A068U2I1	Putative Endo-1,3(4)-beta-glucanase 1	GO:0052861		2.88182066685411	1.04242010791425e-05
Cc06_g02080	GSCOC_T00023448001	A0A068UE58	Putative Uncharacterized protein			2.85625516671078	6.36310437356898e-05
Cc02_g02070	GSCOC_T00020051001	A0A068UBU1	Acidic endochitinase SE2	GO:0004553;GO:0005975	AT5G24090	2.83496491635341	0.000183435231936391
Cc03_g01730	GSCOC_T00025795001	A0A068TSA8	NAD(P)-binding Rossmann-fold superfamily protein	GO:0016021	AT3G62830	2.83191693114238	0.00220708860042829
Cc02_g23670	GSCOC_T00015069001	A0A068TQM6	22.7 kDa class IV heat shock protein		AT4G10250	2.82457915286264	2.89101326521165e-05
Cc09_g01430	GSCOC_T00017812001	A0A068U7A5	WRKY transcription factor 6	GO:0005634;GO:0003700;GO:0043565	AT1G62300	2.8064659156675	2.23972114243182e-09
Cc06_g02670	GSCOC_T00023526001	A0A068UDQ2	Probable protein phosphatase 2C 4	GO:0004722	AT1G07630	2.79155701211493	2.97226312774231e-06
Cc07_g08780	GSCOC_T00040267001	A0A068U587	Putative Probable mannose-6-phosphate isomerase	GO:0004476;GO:0008270;GO:0005975;GO:0009298	AT3G02570	2.78251830735911	1.48631799258075e-10
Cc05_g11900	GSCOC_T00021256001	A0A068UCK2	Putative Early nodulin-like protein 2	GO:0046658;GO:0048046;GO:0009507;GO:0005773;GO:0009055	AT4G27520	2.77278726795141	1.55661474408012e-08
Cc06_g09660	GSCOC_T00041885001	A0A068U4V7	Putative uncharacterized protein	GO:0042025;GO:0005634;GO:0003700;GO:0043565	AT3G24520	2.76982298795765	2.94722892474194e-05
Cc04_g05060	GSCOC_T00022250001	A0A068TPK8	CBL-interacting serine/threonine-protein kinase 5	GO:0005524;GO:0004674;GO:0007165	AT5G10930	2.74476430632584	3.78601193894686e-09
Cc11_g05120	GSCOC_T00020452001	A0A068UB32	G-type lectin S-receptor-like serine/threonine-protein kinase At4g27290	GO:0016021;GO:0005524;GO:0004672;GO:0048544	AT4G27290	2.72595903518566	3.33150123370944e-06
Cc02_g18150	GSCOC_T00014351001	A0A068TLK6	Putative Myosin heavy chain kinase B		AT2G26490	2.71536598404813	0.000124434602260374
Cc10_g14960	GSCOC_T00033655001	A0A068USW5	Abscisic stress-ripening protein 3			2.71459126785826	1.80890336367455e-10
Cc03_g10990	GSCOC_T00042047001	A0A068V272	Cytochrome P450 71A2	GO:0020037;GO:0005506;GO:0004497;GO:0016705	AT3G48310	2.71270284246655	0.00876323558036555
Cc09_g07910	GSCOC_T00003777001	A0A068V9I5	Putative Monoglyceride lipase			2.71096069587761	0.00787593164401788
Cc11_g14210	GSCOC_T00032088001	A0A068TY11	UDP-glycosyltransferase 74B1	GO:0008194	AT1G24100	2.6954935832381	1.5540821559384e-06
Cc05_g05740	GSCOC_T00035151001	A0A068UTW6	Predicted protein	GO:0005634;GO:0003677	AT3G23250	2.66886015515518	0.000514254301563208
Cc03_g01630	GSCOC_T00025782001	A0A068TS98	Putative Protein of unknown function (DUF581)	GO:0000932	AT5G49120	2.66531307640119	3.28809520990568e-06
Cc07_g15370	GSCOC_T00036484001	A0A068TZD8	Lipase/lipooxygenase, PLAT/LH2 family protein		AT4G39730	2.6611436197235	0.000797069169829698
Cc04_g13140	GSCOC_T00018883001	A0A068V766	Putative UDP-glycosyltransferase 83A1	GO:0008194	AT5G05870	2.65791832911034	6.74295749739974e-06
Cc06_g08420	GSCOC_T00031134001	A0A068UQ75	Phospholipase D alpha 1	GO:0016020;GO:0005509;GO:0070290;GO:0004630;GO:0016042;GO:0046470	AT3G15730	2.65315191491661	1.63575864299878e-08
Cc05_g11000	GSCOC_T00021370001	A0A068UCV3	Putative Pathogen-related protein			2.64349135824109	0.00288133176861645
Cc02_g00910	GSCOC_T00019892001	A0A068U9L7	Small heat shock protein, chloroplastic		AT4G27670	2.6240951044451	0.000341172920374495
Cc01_g08690	GSCOC_T00023901001	A0A068UF94	Momilactone A synthase		AT1G52340	2.60202453179128	0.000728867825151523
Cc01_g10160	GSCOC_T00024097001	A0A068UEU0	Putative Ring/U-Box superfamily protein		AT5G19080	2.59254506121151	2.21919466718352e-07
Cc04_g15770	GSCOC_T00042356001	A0A068V258	Probable peptide/nitrate transporter At5g62680	GO:0016021;GO:0022857	AT5G62680	2.5594100400737	2.89639551682565e-07
Cc04_g14140	GSCOC_T00035943001	A0A068UVG7	Putative Serine/threonine-protein kinase ATM	GO:0004674;GO:0006974;GO:2001020;GO:0008380		2.55425002658139	0.00694050491386227
Cc05_g15980	GSCOC_T00038619001	A0A068V143	Putative unknown protein; BEST Arabidopsis thaliana protein match is			2.53754775930114	0.00577224427542592
Cc08_g10300	GSCOC_T00026994001	A0A068UJ62	Hypothetical protein	GO:0016021		2.52416391664296	0.000126401410793287
Cc02_g05870	GSCOC_T00039107001	A0A068UZV3	Arogenate dehydrogenase 1, chloroplastic	GO:0008977;GO:0004665;GO:0006571	AT5G34930	2.51741374113757	0.000450213040594366
Cc10_g07630	GSCOC_T00034498001	A0A068U070	Putative uncharacterized protein			2.51179816471139	0.000478978697916222
Cc08_g00610	GSCOC_T00038491001	A0A068UYY8	Putative unknown protein; FUNCTIONS IN			2.49587230711327	0.00114578942977212
Cc00_g23580	GSCOC_T00010323001	A0A068VK80	Isoflavone reductase homolog A622		AT4G39230	2.49348931422324	9.68825568830881e-07
Cc04_g14520	GSCOC_T00040694001	A0A068V0P0	L-type lectin-domain containing receptor kinase IV.2	GO:0016021;GO:0005524;GO:0030246;GO:0004672	AT2G37710	2.49144069337795	6.47410581330143e-05
Cc06_g00370	GSCOC_T00023212001	A0A068UD28	Putative Protein of unknown function, DUF599	GO:0016021		2.46861813415011	0.000175001021030236
Cc11_g09310	GSCOC_T00032753001	A0A068TZF1	Putative Phosphatidylserine synthase 2	GO:0016021;GO:0006659		2.45736443500364	0.00154121613361221
Cc00_g21580	GSCOC_T00006599001	A0A068VJK9	Putative Systemic acquired resistance protein SAR			2.45081606450967	0.00183080830307965
Cc03_g01220	GSCOC_T00025728001	A0A068TTY2	COBRA-like protein 7	GO:0031225;GO:0016021;GO:0010215	AT4G16120	2.43736870634729	0.00200931965970934
Cc02_g10840	GSCOC_T00029485001	A0A068TWR5	unknown protein; BEST Arabidopsis thaliana protein match is			2.43726878089861	7.53621607432993e-05
Cc07_g12020	GSCOC_T00036930001	A0A068U0F1	Auxin efflux carrier family protein	GO:0016021;GO:0055085	AT2G17500	2.42728354716825	6.3129486680007e-05
Cc11_g09060	GSCOC_T00032793001	A0A068TZG5	RING/FYVE/PHD zinc finger superfamily protein	GO:0016021;GO:0008270		2.42554117029919	0.00461640646705866
Cc07_g13250	GSCOC_T00036766001	A0A068U0F7	Eukaryotic aspartyl protease family protein	GO:0004190		2.42323684663562	6.45848872415178e-09
Cc09_g00130	GSCOC_T00017988001	P54645	6-phosphofructokinase 2	GO:0005737;GO:0003872;GO:0005524;GO:0046872;GO:0006002	AT5G47810	2.42044139370428	0.000936070847921366
Cc01_g15550	GSCOC_T00016548001	A0A068U681	Putative Cytochrome P450 734A6	GO:0020037;GO:0005506;GO:0004497;GO:0016705	AT5G24910	2.41624622375994	0.000305286818058126
Cc02_g09550	GSCOC_T00029643001	A0A068TV40	Duplicated homeodomain-like superfamily protein	GO:0005634;GO:0003677	AT5G08520	2.41509151318011	0.000848203770902133
Cc02_g10830	GSCOC_T00029486001	A0A068TV06	Hypothetical protein			2.40776016929444	1.56120343430505e-05
Cc10_g01200	GSCOC_T00024587001	A0A068UFL6	Probable nucleoredoxin 2		AT4G31240	2.40459880586606	3.55735198860569e-07
Cc03_g03480	GSCOC_T00026038001	A0A068TSU4	Putative Probable membrane-associated kinase regulator 1	GO:0005886;GO:0019210		2.40374521289863	7.00418574288704e-09
Cc09_g09190	GSCOC_T00023086001	A0A068UDG7	Putative Probable WRKY transcription factor 28	GO:0005634;GO:0003700;GO:0043565		2.39579650190168	0.00912313459189227
Cc00_g13040	GSCOC_T00010496001	A0A068VGJ4	Mitochondrial import inner membrane translocase subunit Tim17/Tim22/Tim23 family protein			2.39566690263719	0.00132831618777752
Cc01_g21270	GSCOC_T00004999001	A0A068V8W0	alpha/beta-Hydrolases superfamily protein	GO:0008970;GO:0006629	AT1G02660	2.38732166622377	0.000256392834800625
Cc00_g15960	GSCOC_T00007992001	A0A068VH85	Isoflavone reductase homolog		AT4G39230	2.38615184012443	1.3856730679567e-07
Cc09_g01340	GSCOC_T00017824001	A0A068U8A5	Core-2/I-branching beta-1,6-N-acetylglucosaminyltransferase family protein	GO:0016020		2.38456173461737	1.26947600710545e-09
Cc08_g11200	GSCOC_T00027115001	A0A068UJC1	Serine/threonine-protein kinase SAPK3	GO:0005524;GO:0004674	AT4G33950	2.36274725075566	0.000365097536385934
Cc08_g07740	GSCOC_T00011862001	A0A068VBC3	Hypothetical protein			2.35619230363022	0.00138936451136122
Cc04_g09030	GSCOC_T00022780001	A0A068TRI6	Chaperone DnaJ-domain superfamily protein		AT2G35795	2.35197950164504	2.4977034087905e-05
Cc00_g08270	GSCOC_T00003341001	A0A068VHW2	Isoflavone reductase homolog A622		AT1G75280	2.34609814937035	0.000127966846396788
Cc06_g09070	GSCOC_T00041969001	A0A068U4F9	3-ketoacyl-CoA synthase 11	GO:0016021;GO:0016747;GO:0006633	AT2G26640	2.34576171197174	5.95045661131984e-05
Cc10_g00540	GSCOC_T00024508001	A0A068UGG6	Probable serine/threonine-protein kinase Cx32, chloroplastic	GO:0005524;GO:0004674	AT2G17220	2.342645511899	3.42372920509096e-07
Cc10_g01830	GSCOC_T00024672001	A0A068UIF5	Cytokinin riboside 5'-monophosphate phosphoribohydrolase LOG1	GO:0016787;GO:0009691	AT2G28305	2.33973237122875	6.58695718420512e-05
Cc03_g05070	GSCOC_T00026246001	A0A068TV52	Protein EIN4	GO:0005789;GO:0016021;GO:0005524;GO:0051740;GO:0038199;GO:0046872;GO:0000155	AT3G23150	2.33413865592918	0.00154765174535999
Cc02_g12320	GSCOC_T00029299001	A0A068TTM8	Protein MOTHER of FT and TF 1		AT1G18100	2.31513545530054	0.00352462686892936
Cc05_g04760	GSCOC_T00035011001	A0A068UVZ4	Putative Vacuolar amino acid transporter 1	GO:0016021	AT5G15240	2.30866399806741	6.17992346262781e-06
Cc08_g13770	GSCOC_T00030306001	A0A068UNF3	non-yellowing 1		AT4G22920	2.30575781392628	0.00132831618777752
Cc04_g09860	GSCOC_T00042517001	A0A068V531	HVA22-like protein d	GO:0016021	AT5G50720	2.30035357638158	0.00267305812690809
Cc06_g13760	GSCOC_T00041350001	A0A068U3M0	Putative Glutamate receptor 2.2	GO:0016021;GO:0015276	AT2G29110	2.29162694511834	0.00516877097380065
Cc07_g11230	GSCOC_T00037025001	A0A068U022	Putative Aspartic proteinase-like protein 1	GO:0004190	AT2G17760	2.29103559644085	6.232455553474e-06
Cc09_g09640	GSCOC_T00004085001	A0A068V9Y5	Putative pterin-4-alpha-carbinolamine dehydratase	GO:0008124;GO:0006729	AT1G29810	2.2909450682019	0.000320419015322205
Cc06_g08980	GSCOC_T00041979001	A0A068U4C4	Putative unknown protein; BEST Arabidopsis thaliana protein match is			2.28529533738998	0.00939141542383645
Cc05_g13480	GSCOC_T00021057001	A0A068UBD8	Putative Septum-promoting GTP-binding protein 1	GO:0005525;GO:0003924		2.28240610437705	6.61955480551806e-06
Cc07_g03570	GSCOC_T00039597001	A0A068U1T7	NAC domain-containing protein 100	GO:0005634;GO:0003677;GO:0006355	AT5G61430	2.26438928093255	2.00159740518437e-05
Cc11_g12740	GSCOC_T00032276001	A0A068TVP6	NAC domain-containing protein 29	GO:0005634;GO:0003677;GO:0009793;GO:0009908;GO:0009835;GO:0010150;GO:0009825;GO:0006355	AT1G69490	2.2579460889294	0.000137961274521952
Cc02_g09160	GSCOC_T00029693001	A0A068TUM5	Putative Trans-2,3-enoyl-CoA reductase	GO:0016021;GO:0016627;GO:0006629		2.23943395667403	0.00478025245209275
Cc02_g02860	GSCOC_T00020155001	A0A068UAB4	4-coumarate--CoA ligase-like 10	GO:0048046;GO:0009570;GO:0009506;GO:0050203;GO:0050832;GO:0033611;GO:0010030;GO:0046686;GO:0010214	AT3G48990	2.2345378530288	0.00023286520849723
Cc10_g13270	GSCOC_T00035319001	A0A068UUN0	2-oxoisovalerate dehydrogenase subunit alpha, mitochondrial	GO:0016624	AT1G21400	2.23288030569038	0.000953457911230961
Cc03_g09400	GSCOC_T00042674001	A0A068V3G3	Selenium-binding protein 1	GO:0008430	AT4G14030	2.21129135086712	1.17405640404675e-09
Cc05_g12740	GSCOC_T00021151001	A0A068UBC1	Dynein light chain LC6, flagellar outer arm	GO:0005737;GO:0030286;GO:0016021;GO:0005874;GO:0003774;GO:0007017		2.19546590752383	0.00361689417094304
Cc06_g08410	GSCOC_T00031135001	A0A068UPE9	Putative uncharacterized protein	GO:0016021		2.19310360832988	0.000319630917385194
Cc11_g09360	GSCOC_T00032744001	A0A068TZE8	Putative E3 ubiquitin-protein ligase RHA2A	GO:0016021	AT1G15100	2.1813317243972	0.000465678548578896
Cc07_g11860	GSCOC_T00036947001	A0A068U2F8	Putative Transducin/WD40 repeat-like superfamily protein	GO:0048235		2.17975478638549	0.0032789718699126
Cc02_g06800	GSCOC_T00039230001	A0A068V0L0	Putative Tetratricopeptide repeat (TPR)-like superfamily protein			2.17196487340716	3.87964122316539e-06
Cc00_g28790	GSCOC_T00012906001	A0A068VL76	Isoflavone reductase homolog P3		AT1G75280	2.16842177929118	0.000109257552024933
Cc05_g13050	GSCOC_T00021110001	A0A068UCA3	Organic cation/carnitine transporter 4	GO:0016021;GO:0022857	AT3G20660	2.16681135644087	4.08539252559307e-07
Cc07_g07540	GSCOC_T00040104001	A0A068U3C2	Homeobox-leucine zipper protein HAT22	GO:0005634;GO:0043565;GO:0006355	AT4G37790	2.16164826583109	0.000277884843644484
Cc09_g07450	GSCOC_T00036255001	A0A068UVM1	Reticuline oxidase-like protein	GO:0071949;GO:0016491	AT4G20840	2.14964658774547	0.00029087544181718
Cc01_g01100	GSCOC_T00037984001	A0A068UX86	Putative UDP-glycosyltransferase 85A3		AT1G22380	2.14248317727017	0.00699922093297214
Cc02_g34410	GSCOC_T00000682001	A0A068V9C4	Protein of unknown function (DUF1399)	GO:0005886		2.13658668838476	0.00219081094728934
Cc06_g01670	GSCOC_T00023397001	A0A068UDE0	Probable anion transporter 3, chloroplastic	GO:0016021;GO:0022857	AT2G38060	2.12721609096826	1.2719731809716e-05
Cc10_g00740	GSCOC_T00024532001	A0A068UGI2	unknown protein; INVOLVED IN			2.11998917784789	0.00274041586156348
Cc03_g09660	GSCOC_T00030952001	A0A068UPD4	Ras-related protein RABA5c	GO:0005525;GO:0003924	AT2G43130	2.10432579708247	0.00369952384545639
Cc06_g11830	GSCOC_T00041611001	A0A068U3I9	Threonine synthase 1, chloroplastic	GO:0009570;GO:0005829;GO:0030170;GO:0004795;GO:0006520	AT4G29840	2.09837184254226	0.00154121613361221
Cc02_g05160	GSCOC_T00039017001	A0A068UZB8	Putative Pheophorbidase		AT3G10870	2.0877135340144	0.000300806177466603
Cc10_g09650	GSCOC_T00031516001	A0A068UQC6	Cytochrome P450 716B2	GO:0020037;GO:0005506;GO:0004497;GO:0016705	AT5G36130	2.08386484736288	0.00479386745583228
Cc00_g28260	GSCOC_T00002218001	A0A068VLB8	Ent-kaurene oxidase, chloroplastic	GO:0016021;GO:0020037;GO:0005506;GO:0004497;GO:0016705	AT5G25900	2.08205449881922	0.0029886293818287
Cc06_g14390	GSCOC_T00041262001	A0A068U3W3	Putative Bifunctional dihydroflavonol 4-reductase/flavanone 4-reductase			2.07191536863583	0.00661785927135364
Cc04_g14700	GSCOC_T00040731001	A0A068V3B5	pheophytinase		AT5G13800	2.06279390482907	1.58933090712043e-07
Cc02_g02380	GSCOC_T00020092001	A0A068UAC3	Beta-carotene 3-hydroxylase, chloroplastic	GO:0016021;GO:0005506;GO:0016491;GO:0008610		2.06136810715376	0.00606831609154836
Cc05_g11460	GSCOC_T00021312001	A0A068UEB6	sodium/calcium exchanger family protein / calcium-binding EF hand family protein	GO:0016021;GO:0005509;GO:0055085	AT1G53210	2.05890674196944	0.00787269436701438
Cc08_g14340	GSCOC_T00030236001	A0A068UMM5	tetraspanin10	GO:0016021	AT1G63260	2.04878173995035	0.000610297293298921
Cc11_g13020	GSCOC_T00032235001	A0A068TWB5	Putative uncharacterized protein	GO:0016021		2.01053598620741	1.7656481369124e-06
Cc00_g17430	GSCOC_T00013477001	A0A068VHM7	Isoflavone reductase homolog P3		AT1G75280	2.00461964375623	0.000287297552904563
Cc08_g16060	GSCOC_T00035555001	A0A068UUS4	Putative RING-H2 finger protein ATL21A	GO:0016021;GO:0030247	AT5G07040	1.99462156453304	0.000207355123597872
Cc02_g38910	GSCOC_T00027792001	A0A068UMB0	Common plant regulatory factor 1	GO:0003700	AT2G46270	1.99353750388191	3.70266902449808e-07
Cc04_g03730	GSCOC_T00022071001	A0A068TPZ3	Pleiotropic drug resistance protein 1	GO:0016021;GO:0005524;GO:0016887	AT1G15520	1.98968664738578	0.00196316517323521
Cc03_g02380	GSCOC_T00025880001	A0A068TSG3	Inactive beta-amylase 9	GO:0102229;GO:0016161;GO:0000272	AT5G18670	1.97121149554581	0.00522606113787695
Cc02_g34760	GSCOC_T00011783001	A0A068VCH2	Polynucleotidyl transferase, ribonuclease H-like superfamily protein	GO:0008408;GO:0003676;GO:0010587;GO:0030422		1.97056854113182	0.00415237958538443
Cc06_g01440	GSCOC_T00023362001	A0A068UFT7	RING/U-box superfamily protein	GO:0005829;GO:0061630;GO:0009789;GO:0009737;GO:0009651;GO:0006511		1.96294795096014	0.00164312281714419
Cc00_g30010	GSCOC_T00001095001	A0A068VM57	Putative Heavy metal-associated isoprenylated plant protein 26	GO:0046872;GO:0030001		1.96127248442032	0.000275650305685107
Cc07_g10360	GSCOC_T00037124001	A0A068U2U9	Cytochrome P450 84A1	GO:0016021;GO:0020037;GO:0005506;GO:0004497;GO:0016705		1.95206607801807	2.05579850599757e-05
Cc07_g02150	GSCOC_T00039397001	A0A068U0P5	Phosphoglucan phosphatase LSF1, chloroplastic	GO:0009569;GO:0009570;GO:0019203;GO:0008138;GO:0005983		1.94814403718439	0.00768795077551779
Cc11_g04190	GSCOC_T00001330001	A0A068VB88	Putative polyol transporter 1	GO:0016021;GO:0022857	AT2G16120	1.94707349185181	0.000495237192638478
Cc08_g10810	GSCOC_T00027060001	A0A068UIC4	Heat shock factor protein HSF30	GO:0042025;GO:0005634;GO:0003700;GO:0043565	AT2G26150	1.92487660166789	0.00992109327877969
Cc11_g10540	GSCOC_T00032564001	A0A068TW98	Allene oxide cyclase 4, chloroplastic	GO:0046423;GO:0009695		1.92202855625754	0.00231762135621082
Cc08_g13090	GSCOC_T00030385001	A0A068UMY6	Putative Bifunctional inhibitor/lipid-transfer protein/seed storage 2S albumin superfamily protein			1.89828941555721	0.0013407346006537
Cc01_g15180	GSCOC_T00016595001	A0A068U8W3	CBL-interacting serine/threonine-protein kinase 11	GO:0005524;GO:0004674;GO:0007165	AT2G30360	1.8969791488971	0.000229670172570028
Cc08_g05330	GSCOC_T00024288001	A0A068UG43	Alternative oxidase 3, mitochondrial	GO:0016021;GO:0070469;GO:0009916;GO:0046872;GO:0102721	AT1G32350	1.8925898213429	0.000196268598478314
Cc10_g05130	GSCOC_T00034851001	A0A068U0Y6	Putative Uncharacterised conserved protein UCP031279			1.8862941464499	0.00606831609154836
Cc04_g07430	GSCOC_T00022562001	A0A068TQZ7	Putative Lipase member N	GO:0016021;GO:0006629		1.87304023551818	9.85822307013597e-06
Cc07_g12910	GSCOC_T00036815001	A0A068U286	Glutamate decarboxylase	GO:0004351;GO:0030170;GO:0006536	AT2G02000	1.86114003909602	1.87696783570275e-05
Cc09_g01320	GSCOC_T00017827001	A0A068U7E3	Transcription factor jumonji (jmjC) domain-containing protein			1.85063244411942	2.52353564929362e-05
Cc05_g07170	GSCOC_T00042242001	A0A068V1Y4	Two pore calcium channel protein 1A	GO:0005794;GO:0016021;GO:0000325;GO:0005774;GO:0005509;GO:0042802;GO:0005216;GO:0006816;GO:0019722;GO:0080141;GO:0010119;GO:0009845		1.84338336769294	0.0083596077715051
Cc08_g01550	GSCOC_T00038369001	A0A068V0L1	pleckstrin homology (PH) domain-containing protein	GO:0005794;GO:0009506;GO:0005773		1.84335260449142	0.00124564073285832
Cc02_g04180	GSCOC_T00020322001	A0A068UAV5	Beta-fructofuranosidase, soluble isoenzyme I	GO:0004553;GO:0005975	AT1G62660	1.84280024297236	0.00130324605495627
Cc02_g12560	GSCOC_T00029268001	A0A068TTP0	Putative Probable ADP-ribosylation factor GTPase-activating protein AGD5	GO:0005096;GO:0046872	AT5G54310	1.83112684470335	0.00994228897446367
Cc07_g08000	GSCOC_T00040162001	A0A068U2E8	5'-AMP-activated protein kinase-related			1.82396399703853	2.79324445757724e-05
Cc10_g07790	GSCOC_T00034479001	A0A068TY42	Early-responsive to dehydration stress protein (ERD4)	GO:0016021	AT1G10090	1.81149697942097	0.000169188856025461
Cc01_g08010	GSCOC_T00015487001	A0A068V4U3	Putative Probable carboxylesterase 15	GO:0016787	AT5G06570	1.79001938387581	1.56352761320432e-05
Cc00_g18750	GSCOC_T00008462001	A0A068VLB9	Hypothetical protein	GO:0005524;GO:0004672	AT1G11330	1.78360131416445	0.000512624386211189
Cc10_g00730	GSCOC_T00024531001	A0A068UI53	unknown protein; BEST Arabidopsis thaliana protein match is	GO:0009570;GO:0043036;GO:2001070;GO:2000904		1.76645873969383	0.00834568139139654
Cc00_g01370	GSCOC_T00010635001	A0A068VC74	L-type lectin-domain containing receptor kinase IV.1	GO:0016021;GO:0005524;GO:0030246;GO:0004672	AT3G53810	1.76326832085351	0.00146743769367386
Cc02_g38620	GSCOC_T00027839001	A0A068UKE5	Desiccation protectant protein Lea14 homolog	GO:0005829;GO:0050832;GO:0009269;GO:0009644;GO:0009611		1.75893716854204	0.000245991987569256
Cc05_g09440	GSCOC_T00021585001	A0A068UCD7	Mitogen-activated protein kinase 10	GO:0005524;GO:0004707	AT2G42880	1.75722210937473	0.000361269712003226
Cc06_g09330	GSCOC_T00041928001	A0A068U492	Predicted protein			1.74426869354358	0.00401362270770496
Cc06_g11740	GSCOC_T00041620001	A0A068U4Q4	Putative uncharacterized protein	GO:0046872;GO:0004722	AT1G72770	1.73481162125696	0.00478025245209275
Cc06_g04430	GSCOC_T00042952001	A0A068V3Q7	Major facilitator superfamily protein	GO:0016021		1.70884879445378	0.00626825790644641
Cc01_g10510	GSCOC_T00024147001	A0A068UEX7	4-coumarate--CoA ligase-like 7	GO:0003824	AT4G05160	1.70559546224826	0.0083596077715051
Cc05_g02020	GSCOC_T00040820001	A0A068V3F3	ARM repeat superfamily protein			1.69643450917545	0.00109429906580603
Cc02_g32230	GSCOC_T00012957001	A0A068VCS1	Sodium/hydrogen exchanger 2	GO:0016021;GO:0015385;GO:0006885	AT3G05030	1.68511376272673	0.000706761384964549
Cc07_g12210	GSCOC_T00036908001	A0A068U2D2	RNA-binding (RRM/RBD/RNP motifs) family protein	GO:0003729	AT3G54770	1.6370259282893	0.00656482502762538
Cc03_g02590	GSCOC_T00025913001	A0A068TRJ8	Sugar transporter ERD6-like 16	GO:0016021;GO:0022857	AT5G18840	1.6240840660754	0.00705535164799495
Cc02_g27050	GSCOC_T00025022001	A0A068UGN4	Hypothetical protein	GO:0005634;GO:0043565;GO:0006355	AT5G06710	1.6240003693902	0.00929523658749824
Cc07_g10120	GSCOC_T00037157001	A0A068U0V1	Putative Epoxide hydrolase 2	GO:0003824		1.6161456451677	0.000547321790040933
Cc02_g21010	GSCOC_T00014732001	A0A068TMZ2	Peptidyl-prolyl cis-trans isomerase FKBP12	GO:0005829;GO:0003755	AT5G64350	1.61501785979672	8.39099410512765e-05
Cc02_g15170	GSCOC_T00013955001	A0A068TN81	CBL-interacting serine/threonine-protein kinase 12	GO:0005524;GO:0004674;GO:0007165		1.61456417799475	1.70751223727255e-05
Cc05_g14290	GSCOC_T00038836001	A0A068UZQ7	Putative uncharacterized protein			1.59990852913222	0.00369773407293798
Cc06_g05350	GSCOC_T00043081001	A0A068V663	Putative UPF0481 protein At3g47200	GO:0016021		1.58683146472404	0.00761491734525663
Cc06_g02040	GSCOC_T00023444001	A0A068UFZ4	Probable glutathione S-transferase		AT3G09270	1.55794473892605	0.00284844668757281
Cc08_g00140	GSCOC_T00005569001	A0A068VE29	Hypothetical protein			1.55616130565432	0.00161769685661819
Cc11_g12170	GSCOC_T00032353001	A0A068TWI4	Beta-glucosidase 40	GO:0016021;GO:0004553;GO:0005975		1.54994478828994	0.006175019877319
Cc06_g18520	GSCOC_T00040471001	A0A068V104	Triacylglycerol lipase SDP1	GO:0004806;GO:0016042	AT5G04040	1.52377653849033	4.14260263646117e-05
Cc10_g06500	GSCOC_T00034647001	A0A068TXZ2	Purine permease 3	GO:0016021;GO:0015211	AT1G28220	1.52228226013775	0.00758875795542445
Cc01_g14950	GSCOC_T00016622001	A0A068U6E7	Putative Probable WRKY transcription factor 3	GO:0005634;GO:0003700;GO:0043565	AT2G38470	1.51763006362558	0.00813581397414418
Cc08_g16310	GSCOC_T00035588001	A0A068UUY5	DCD (Development and Cell Death) domain protein			1.51144875183085	0.00100019708292569
Cc10_g04070	GSCOC_T00034982001	A0A1I9KKJ9	Putative ABSCISIC ACID-INSENSITIVE 5-like protein 5	GO:0003700;GO:0045893;GO:0003700;GO:0045893		1.50176858044221	0.000110145500445874
Cc10_g09690	GSCOC_T00031512001	A0A068UQN5	Patellin 1		AT1G72160	1.49845311801111	0.00135314659973239
Cc10_g03100	GSCOC_T00024830001	A0A068UG39	unknown protein; Has 219 Blast hits to 202 proteins in 78 species			1.4978557834282	0.00252808750691605
Cc10_g06640	GSCOC_T00034629001	A0A068TYJ2	Isoamylase 3, chloroplastic	GO:0004553;GO:0005975		1.49706176850462	0.000143987151916559
Cc04_g01710	GSCOC_T00021829001	A0A068TNH7	Putative phospholipid-transporting ATPase 4	GO:0016021;GO:0005524;GO:0140326;GO:0000287;GO:0015914		1.487674207936	0.00442563230899207
Cc05_g11620	GSCOC_T00021291001	A0A068UCF4	Putative unknown protein; BEST Arabidopsis thaliana protein match is			1.48489256561344	0.000942620552202983
Cc11_g05800	GSCOC_T00020551001	A0A068UB26	Annexin D5	GO:0051015;GO:0005509;GO:0005544;GO:0009555;GO:0009846;GO:0009860;GO:0009409;GO:0009408;GO:0009639;GO:0009651;GO:0009414		1.48219634240065	0.00138898032685572
Cc04_g04820	GSCOC_T00022221001	A0A068TPR2	unknown protein; BEST Arabidopsis thaliana protein match is			1.47887323202956	0.00293544388624415
Cc02_g18860	GSCOC_T00014443001	A0A068TMJ8	Putative ABSCISIC ACID-INSENSITIVE 5-like protein 6	GO:0003700;GO:0045893		1.47230820647019	0.00779483811469502
Cc02_g02420	GSCOC_T00020097001	A0A068UBY2	unknown protein; BEST Arabidopsis thaliana protein match is			1.46789417379971	0.00681238253285559
Cc00_g10950	GSCOC_T00002319001	A0A068VFV0	Putative Transcription elongation factor (TFIIS) family protein	GO:0005634	AT5G05140	1.45664391171067	6.83054626185831e-05
Cc06_g06260	GSCOC_T00031405001	A0A068UQ15	Putative B3 domain-containing protein At3g11580	GO:0005634;GO:0003677		1.45326578057249	0.00861092418768805
Cc02_g02410	GSCOC_T00020096001	A0A068UA31	conserved peptide upstream open reading frame 14			1.4524311053614	0.00357138156930711
Cc02_g07800	GSCOC_T00029891001	A0A068TVN1	Protein kinase APK1A, chloroplastic	GO:0005524;GO:0004674	AT5G02290	1.43384188269756	0.000140596542507698
Cc03_g05420	GSCOC_T00026295001	A0A068TV76	Uncharacterised conserved protein UCP015417, _x0001_vWA			1.42849803930599	0.00550726837433762
Cc03_g03000	GSCOC_T00025975001	A0A068TRU3	Putative Carboxymethylenebutenolidase homolog	GO:0016787		1.42490909500022	0.00794151312835089
Cc08_g15940	GSCOC_T00035540001	A0A068UV58	Putative uncharacterized protein			1.41342294493077	0.00197247460796755
Cc02_g18160	GSCOC_T00014352001	A0A068TMB0	Putative Guanine nucleotide-binding protein alpha-2 subunit	GO:0005634;GO:0031683;GO:0005525;GO:0003924;GO:0042742;GO:0007186	AT2G23460	1.39974834954578	0.00607344020311887
Cc05_g10450	GSCOC_T00021439001	A0A068UD13	C2 domain-containing protein At1g53590	GO:0016021;GO:0008289;GO:0006869	AT1G53590	1.39902130732714	0.00166050228426604
Cc02_g20060	GSCOC_T00014607001	A0A068TMS5	ethylene-dependent gravitropism-deficient and yellow-green-like 3	GO:0016021		1.39303124396625	0.00284824403512214
Cc04_g01270	GSCOC_T00021767001	A0A068TNP4	RELA/SPOT homolog 3	GO:0015969		1.39038088218696	0.000695829851463814
Cc09_g01130	GSCOC_T00017851001	A0A068U7D0	Plastid-lipid-associated protein, chloroplastic			1.36418213490143	0.00459072302984084
Cc06_g13640	GSCOC_T00041367001	A0A068U447	Xylose isomerase	GO:0046872;GO:0009045;GO:0042732	AT5G57655	1.35856934882885	0.00369773407293798
Cc07_g12470	GSCOC_T00036869001	A0A068U0B9	Probable acyl-activating enzyme 5, peroxisomal	GO:0003824	AT5G16370	1.33315967736768	0.00114578942977212
Cc09_g04650	GSCOC_T00017399001	A0A068U912	Domain of unknown function (DUF23)	GO:0016757		1.31501284122223	0.00839695381059483
Cc09_g06950	GSCOC_T00036343001	A0A068UVS3	Probable caffeine synthase 4	GO:0008168		1.27565269670421	0.00203720297620727
Cc04_g09100	GSCOC_T00022788001	A0A068TRQ9	Glutamate decarboxylase	GO:0009506;GO:0004351;GO:0030170;GO:0006536	AT5G17330	1.2754271480078	0.00944838988855128
Cc07_g12680	GSCOC_T00036844001	A0A068TZQ6	Probable polyamine oxidase 4	GO:0016491	AT1G65840	1.19244875281798	0.00268998339831729
Cc06_g11020	GSCOC_T00041706001	A0A068U406	Hypothetical protein	GO:0015031		1.11333221705751	0.00929723866530612
Cc03_g03220	GSCOC_T00026004001	A0A068TUH8	Nuclear transcription factor Y subunit C-9	GO:0005634;GO:0046982		1.09997516731313	0.00714968968148364
Cc03_g05320	GSCOC_T00026281001	A0A068TV71	1-aminocyclopropane-1-carboxylate oxidase homolog 1	GO:0046872;GO:0016491		1.07408282407015	0.00583212383808797
