# Supplementary material for: Understanding the Impact of Drought in Coffea Genotypes: Transcriptomic Analysis Supports a Common High Resilience to Moderate Water Deficit but a Genotype Dependent Sensitivity to Severe Water Deficit
Source: MDPI journal article supplement (doi:10.3390/agronomy11112255), 2021-11-08
Supplement: s1 [file s1 › Table_S4.xlsx]

## Sheet: Down-regulated
Gene ID	ORF Name	Uniprot acession	Protein Name	GO Terms	TAIR	Log2FC	FDR
Cc03_g10850	GSCOC_T00042017001	A0A068V451	Putative ROP-interactive CRIB motif-containing protein 4		AT3G23380	-21.5470614795887	7.41174729132681e-07
Cc04_g15520	GSCOC_T00042324001	A0A068V237	Putative Mitochondrial outer membrane protein porin of 36 kDa	GO:0005741;GO:0008308		-10.9266147750838	1.19027966984899e-16
Cc11_g08360	GSCOC_T00032886001	A0A068TZL0	Putative MLP-like protein 28	GO:0006952		-10.7248816106389	2.48635485312873e-14
Cc11_g07530	GSCOC_T00018044001	A0A068V724	Putative LRR receptor-like serine/threonine-protein kinase GSO1		AT5G45770	-10.6101420110062	1.03238891767603e-13
Cc01_g11300	GSCOC_T00024256001	A0A068UEY8	Fasciclin-like arabinogalactan protein 11		AT5G03170	-10.5815226700745	3.62355343886329e-05
Cc04_g12550	GSCOC_T00005319001	A0A068V8S2	Probable LRR receptor-like serine/threonine-protein kinase At4g26540	GO:0016021;GO:0005524;GO:0004674	AT4G26540	-10.5608983962758	2.80703612028356e-14
Cc01_g05920	GSCOC_T00027420001	A0A068UJT1	Protein GAST1		AT1G74670	-10.4792107027532	6.57048768609487e-14
Cc01_g12960	GSCOC_T00028253001	A0A068ULE9	Expansin-A4	GO:0005618;GO:0005576;GO:0016020;GO:0009664	AT2G39700	-10.3125573090171	3.04834646705284e-14
Cc10_g02800	GSCOC_T00024789001	A0A068UG09	RAD-like 1	GO:0005634;GO:0003677	AT4G39250	-10.1456921316016	2.91350626460803e-05
Cc00_g18380	GSCOC_T00005502001	A0A068VHW6	Momilactone A synthase		AT3G51680	-9.93161283401157	2.60260894768953e-11
Cc11_g04790	GSCOC_T00042911001	A0A068V5X5	Auxin-induced protein 15A	GO:0009733	AT5G18050	-9.92977600127316	1.20180539056884e-12
Cc04_g03410	GSCOC_T00022035001	A0A068TP00	Putative uncharacterized protein			-9.91610744892165	7.02623920375085e-11
Cc08_g11520	GSCOC_T00027156001	A0A068UIQ2	Putative HXXXD-type acyl-transferase family protein	GO:0016747;GO:0042759;GO:0010025	AT4G24510	-9.83527880860186	8.69283094721627e-17
Cc01_g09890	GSCOC_T00024060001	A0A068UFL3	Glucomannan 4-beta-mannosyltransferase 2	GO:0005794;GO:0016021;GO:0047259;GO:0051753;GO:0010192;GO:0048359	AT5G22740	-9.48957094828596	8.85958902366365e-12
Cc05_g10250	GSCOC_T00021480001	A0A068UD36	Polyphenol oxidase, chloroplastic	GO:0004097;GO:0046872;GO:0046148		-9.41046210639839	8.83578049756489e-38
Cc08_g03880	GSCOC_T00034185001	A0A068UTJ6	Putative CASP-like protein RCOM_1206790	GO:0016021;GO:0005886		-9.37845713988564	5.35053039635768e-10
Cc08_g14880	GSCOC_T00035399001	A0A068UWM4	Cytochrome P450 86A2	GO:0020037;GO:0005506;GO:0004497;GO:0016705	AT4G00360	-9.27854197235764	2.81273165190143e-18
Cc04_g07330	GSCOC_T00022544001	A0A068TQY3	Putative Protein ASPARTIC PROTEASE IN GUARD CELL 1	GO:0004190;GO:0009737;GO:0009414	AT3G18490	-9.27490945855648	1.8933454636882e-11
Cc07_g14500	GSCOC_T00036608001	A0A068U014	Putative Transcription factor bHLH96	GO:0046983	AT1G72210	-9.2547066376996	1.3760994648856e-09
Cc02_g09710	GSCOC_T00029619001	A0A068TUI1	TRICHOME BIREFRINGENCE-LIKE 36		AT3G54260	-9.24212341120186	9.83920248004343e-10
Cc06_g08040	GSCOC_T00031181001	A0A068UQ53	Putative uncharacterized protein		AT4G12470	-9.15903328149615	6.22980283804894e-30
Cc06_g01620	GSCOC_T00023390001	A0A068UDD6	Laccase-4	GO:0048046;GO:0005507;GO:0052716;GO:0046274	AT2G38080	-9.15301117554562	8.20054254261556e-09
Cc10_g01820	GSCOC_T00024670001	A0A068UGJ8	Endoglucanase 24	GO:0016021;GO:0008810;GO:0030245	AT1G19940	-9.10324637368289	3.39905654595144e-09
Cc05_g12850	GSCOC_T00021135001	A0A068UCB7	Calcium-binding protein PBP1		AT4G27280	-9.07525087530766	7.75104278473733e-34
Cc02_g13790	GSCOC_T00029096001	A0A068TVX4	Putative Protein E6			-9.02092686901963	8.06933161283098e-47
Cc11_g01930	GSCOC_T00019491001	A0A068U8I2	Ran BP2/NZF zinc finger-like superfamily protein	GO:0046872		-8.98891248472794	1.83158707101185e-08
Cc01_g16260	GSCOC_T00016463001	A0A068U5W6	Hypothetical protein			-8.9291216349289	6.76840371527226e-09
Cc11_g05600	GSCOC_T00020519001	A0A068UB03	Putative CONTAINS InterPro DOMAIN/s	GO:0010088		-8.86197937609911	1.0856819261089e-07
Cc00_g17620	GSCOC_T00012044001	A0A068VHP2	Nudix hydrolase 2	GO:0016787		-8.84056903185246	1.39605283759771e-06
Cc02_g09840	GSCOC_T00029602001	A0A068TX02	Putative Major facilitator superfamily protein	GO:0016021;GO:0022857		-8.8293871732063	9.21279810808839e-09
Cc01_g14170	GSCOC_T00028412001	A0A068UL12	Vacuolar cation/proton exchanger 1	GO:0016021;GO:0005774;GO:0015369	AT3G51860	-8.75015340796879	4.34228643319667e-39
Cc05_g05930	GSCOC_T00035180001	A0A068UTM3	Putative cyclin-D6-1	GO:0042025;GO:0005634;GO:0051726		-8.74324653256658	7.22212744439473e-07
Cc03_g12130	GSCOC_T00015283001	A0A068U5M7	Zinc transporter 5	GO:0016021;GO:0005385	AT1G05300	-8.71744381326137	1.65823863652984e-06
Cc00_g17790	GSCOC_T00004701001	A0A068VIG6	Hypothetical protein			-8.70414302153327	7.10324584578324e-06
Cc02_g36340	GSCOC_T00003937001	A0A068VB76	Probable carboxylesterase 8	GO:0016787	AT2G45600	-8.69750867994531	1.30749086487651e-07
Cc00_g09440	GSCOC_T00008030001	A0A068VFN6	RHO guanyl-nucleotide exchange factor 14	GO:0005089;GO:0080092	AT1G31650	-8.68617803383027	4.73678621519069e-08
Cc03_g14300	GSCOC_T00031828001	A0A068URF4	Hypothetical protein			-8.66024440191387	3.36567138207932e-06
Cc06_g01530	GSCOC_T00023375001	A0A068UDZ3	Glycerol-3-phosphate acyltransferase 6	GO:0016021;GO:0016746	AT2G38110	-8.65626525176338	2.25857352032101e-22
Cc07_g00190	GSCOC_T00019083001	A0A068V7I1	Pectate lyase	GO:0046872;GO:0030570;GO:0045490	AT5G63180	-8.62734713346011	5.4373171404118e-08
Cc11_g16200	GSCOC_T00038155001	A0A068UYG3	Probable pectate lyase 5	GO:0046872;GO:0030570;GO:0045490	AT1G67750	-8.57468804823801	1.21210264659414e-07
Cc06_g04770	GSCOC_T00043000001	A0A068V3F5	Putative PLATZ transcription factor family protein			-8.56824620009675	1.02431232314662e-08
Cc02_g16640	GSCOC_T00014157001	A0A068TKW3	Putative Aquaporin PIP-type	GO:0016021;GO:0015267		-8.55990304138124	5.43285323222931e-24
Cc11_g07480	GSCOC_T00018049001	A0A068V728	Putative Receptor-like protein 12	GO:0016021	AT1G71830	-8.55822675752782	3.98125468653208e-12
Cc08_g04480	GSCOC_T00015634001	A0A068V4K1	Anthocyanin regulatory C1 protein	GO:0005634;GO:0003677	AT2G16720	-8.53801532770939	5.27957430166708e-07
Cc09_g01950	GSCOC_T00017742001	A0A068U9T4	Putative Cytochrome P450 77A3	GO:0005886;GO:0020037;GO:0005506;GO:0004497;GO:0016705	AT5G04660	-8.53607440833768	3.0615423808058e-07
Cc04_g03610	GSCOC_T00022056001	A0A068TP25	Auxin-induced protein 22A	GO:0005634;GO:0009734;GO:0006355	AT3G15540	-8.49590623315307	5.35470328038164e-08
Cc10_g09410	GSCOC_T00031548001	A0A068UR78	Putative Protein AIG1	GO:0005525	AT1G33970	-8.44783824368608	5.36819139550377e-07
Cc05_g11830	GSCOC_T00021265001	A0A068UBR7	Putative uncharacterized protein			-8.42825679582932	1.16682174212828e-07
Cc01_g08220	GSCOC_T00015515001	A0A068V6R3	Putative receptor like protein 33	GO:0016021	AT3G05660	-8.42763089488496	4.80806733325902e-07
Cc10_g04590	GSCOC_T00034917001	A0A068TZ40	Putative Subtilisin-like protease	GO:0004252	AT2G05920	-8.41486345705963	2.45075753952731e-41
Cc11_g10910	GSCOC_T00032513001	A0A068TYV8	Phosphate transporter PHO1 homolog 1	GO:0016021	AT1G68740	-8.36985323126357	3.51932219821603e-06
Cc03_g08150	GSCOC_T00033208001	A0A068USC7	Hypothetical protein			-8.36462259689061	7.08602298276959e-10
Cc00_g28840	GSCOC_T00011248001	A0A068VL83	Cellulose synthase-like protein G3	GO:0016021;GO:0016760;GO:0071555;GO:0030244	AT4G23990	-8.3644643672464	1.00770791342891e-11
Cc03_g15590	GSCOC_T00026848001	A0A068UIL3	UDP-glucose flavonoid 3-O-glucosyltransferase 6	GO:0008194		-8.36053293319701	6.14062559545738e-06
Cc06_g16770	GSCOC_T00004128001	A0A068VDK4	Thiol protease SEN102	GO:0008234	AT5G45890	-8.33785878825491	7.60361355408745e-07
Cc00_g05060	GSCOC_T00000062001	A0A068VFQ5	Putative Leucine-rich repeat receptor-like serine/threonine-protein kinase At1g17230		AT3G21340	-8.33436061769357	7.67066225533502e-07
Cc02_g15520	GSCOC_T00014003001	A0A068TNA8	Hypothetical protein	GO:0016021;GO:0003677	AT5G35550	-8.32555190832557	6.02637722436863e-18
Cc00_g18260	GSCOC_T00012288001	A0A068VL69	Putative LRR receptor-like serine/threonine-protein kinase ERL2		AT1G69990	-8.31528688396104	3.55583917633808e-08
Cc02_g15530	GSCOC_T00014005001	A0A068TLN9	Putative uncharacterized protein	GO:0005634;GO:0003677	AT2G47460	-8.2974507888489	2.56982901531973e-11
Cc01_g15270	GSCOC_T00016583001	A0A068U789	Expansin-A2	GO:0005618;GO:0005576;GO:0016020;GO:0009664	AT2G40610	-8.28187457733221	5.28674304858744e-19
Cc06_g16470	GSCOC_T00030688001	A0A068UNH5	Probably inactive leucine-rich repeat receptor-like protein kinase At5g06940	GO:0016021;GO:0005524;GO:0004672	AT5G06940	-8.28111958328055	1.38160743138045e-08
Cc02_g16370	GSCOC_T00014121001	A0A068TNJ5	Thaumatin-like protein	GO:0016021	AT1G75040	-8.2805307642909	3.89481751260508e-07
Cc05_g10420	GSCOC_T00021444001	A0A068UCU0	Putative Predicted protein			-8.26944863729303	3.5021139357874e-06
Cc02_g32030	GSCOC_T00018911001	A0A068V7K5	Putative Probable serine/threonine-protein kinase Cx32, chloroplastic	GO:0005524;GO:0004672	AT2G17220	-8.26565733244139	2.34816431640293e-06
Cc07_g06890	GSCOC_T00040016001	A0A068U345	Scarecrow-like protein 32		AT3G49950	-8.26275284609542	2.9568765704224e-08
Cc04_g16340	GSCOC_T00035723001	A0A068UVF9	Expansin-A15	GO:0005618;GO:0005576;GO:0016020;GO:0009664	AT2G03090	-8.25898435537434	9.77740427334777e-28
Cc03_g10700	GSCOC_T00041994001	A0A068V432	Probably inactive leucine-rich repeat receptor-like protein kinase At3g28040	GO:0016021;GO:0005524;GO:0004672	AT3G28040	-8.17523591586141	6.54332692564804e-32
Cc10_g09050	GSCOC_T00034304001	A0A068TXA1	Putative IQ-domain 33			-8.13432584720458	1.48709505612962e-06
Cc10_g11960	GSCOC_T00031875001	A0A068URH7	unknown protein; FUNCTIONS IN			-8.13051434066489	1.78401588627648e-06
Cc00_g35110	GSCOC_T00008391001	A0A068VNF3	Putative Leucine-rich repeat receptor-like protein kinase PXL2	GO:0016021		-8.12502677758648	7.49486956901529e-05
Cc11_g11470	GSCOC_T00032442001	A0A068TWP8	Putative DNA-3-methyladenine glycosylase	GO:0008725;GO:0006284		-8.12267196848474	1.3435682512762e-05
Cc03_g01550	GSCOC_T00025770001	A0A068TRH6	unknown protein; BEST Arabidopsis thaliana protein match is			-8.09727268579801	1.28019352374854e-06
Cc10_g04890	GSCOC_T00034880001	A0A068TZ21	Putative Cyclin-D3-2	GO:0042025	AT4G34160	-8.06746051789076	7.61584736117176e-08
Cc01_g04350	GSCOC_T00004456001	A0A068VA16	LOB domain-containing protein 4		AT1G31320	-8.06592915027436	3.00599285440152e-06
Cc06_g01950	GSCOC_T00023434001	A0A068UEB7	Putative uncharacterized protein			-8.04681812661687	2.92737980273291e-17
Cc01_g08330	GSCOC_T00015536001	A0A068V522	Putative Receptor-like protein 12	GO:0016021	AT3G05660	-8.03377191651195	9.11169507553301e-06
Cc03_g06860	GSCOC_T00026510001	A0A068TTJ1	Auxin-responsive family protein	GO:0016021;GO:0046872;GO:0055114		-8.02676047666739	6.79364955642706e-06
Cc10_g14320	GSCOC_T00012023001	A0A068VF27	Putative uncharacterized protein	GO:0009055		-8.01381071528904	1.64979656019467e-07
Cc01_g10080	GSCOC_T00024088001	A0A068UH86	Putative Lysosomal Pro-X carboxypeptidase	GO:0008236		-7.97420227239191	0.000365782101064239
Cc06_g14430	GSCOC_T00041257001	A0A068U2T3	Putative glutamine amidotransferase YLR126C	GO:0006541	AT2G23970	-7.9699080468967	1.05633126798795e-06
Cc08_g00490	GSCOC_T00038509001	A0A068UZ56	Adenine phosphoribosyltransferase 2	GO:0005737;GO:0003999;GO:0006168;GO:0009116		-7.96423801458687	1.8419985292686e-05
Cc03_g01290	GSCOC_T00025735001	A0A068TR76	Major allergen Pru ar 1	GO:0010427;GO:0004864;GO:0038023;GO:0009738;GO:0006952	AT1G24020	-7.96255243869702	2.23126371901168e-17
Cc05_g04330	GSCOC_T00031655001	A0A3P8MYH8	L-ascorbate oxidase homolog	GO:0005507;GO:0016491;GO:0005507;GO:0016491	AT4G12420	-7.95634547845129	1.68722954638897e-08
Cc09_g04130	GSCOC_T00017463001	A0A068U6H9	unknown protein; BEST Arabidopsis thaliana protein match is	GO:0016021		-7.95045540433709	2.22674652676745e-05
Cc10_g09420	GSCOC_T00031547001	A0A068UT13	Putative Protein AIG1	GO:0005525		-7.94978558752919	8.48222735474402e-05
Cc01_g08250	GSCOC_T00015525001	A0A068V4M2	Putative Receptor-like protein 12	GO:0016021		-7.92037071829339	0.000114335796645978
Cc00_g35910	GSCOC_T00011630001	A0A068VNL0	Putative amidase C869.01			-7.88974657868284	4.21740542517499e-06
Cc03_g07650	GSCOC_T00026622001	A0A068TT55	Hypothetical protein	GO:0016021		-7.86688432256817	1.71540620872627e-05
Cc05_g00210	GSCOC_T00017046001	A0A068V5J0	Putative Glutamate receptor 2.7	GO:0016021;GO:0015276		-7.86500505939457	3.72518604300871e-05
Cc04_g02380	GSCOC_T00021909001	A0A068TPI1	GDSL esterase/lipase APG	GO:0016788	AT3G16370	-7.86109893625863	2.53485033056505e-53
Cc11_g04610	GSCOC_T00004819001	A0A068V902	Momilactone A synthase			-7.8604170059459	0.00013534682779763
Cc07_g15640	GSCOC_T00036452001	A0A068TYN3	Heavy metal-associated isoprenylated plant protein 26	GO:0046872;GO:0030001		-7.82346974828416	1.9076626214647e-05
Cc01_g06720	GSCOC_T00030070001	A0A068UMJ2	L-ascorbate oxidase	GO:0005576;GO:0005507;GO:0016491		-7.81802262226401	5.99696327029484e-06
Cc03_g09650	GSCOC_T00030951001	A0A068UP31	Auxin-responsive family protein	GO:0016021;GO:0046872;GO:0055114		-7.81111839241288	2.98556107167014e-05
Cc05_g10310	GSCOC_T00021467001	A0A068UEN7	Polyphenol oxidase I, chloroplastic	GO:0004097;GO:0046872;GO:0046148		-7.79423693890629	2.07030130085419e-06
Cc04_g04250	GSCOC_T00022147001	A0A068TQE8	Ethylene-responsive transcription factor WIN1	GO:0005634;GO:0003677;GO:0003700	AT1G15360	-7.79155418032444	6.36484110620241e-10
Cc08_g15510	GSCOC_T00035483001	A0A068UUK2	Putative Aluminum-activated malate transporter 9	GO:0016021;GO:0015743		-7.79015487762779	0.000293631422037484
Cc07_g13130	GSCOC_T00036783001	A0A068TZI6	Probable receptor protein kinase TMK1	GO:0016021;GO:0005886;GO:0005524;GO:0004675	AT1G66150	-7.78893323078459	1.90345499972732e-11
Cc03_g03080	GSCOC_T00025985001	A0A068TSP3	Adenylate isopentenyltransferase 5, chloroplastic	GO:0008033	AT5G19040	-7.78396601430754	2.15965132057429e-05
Cc02_g19090	GSCOC_T00014473001	A0A068TLN2	Uncharacterized protein At4g06744		AT4G06744	-7.77211622143712	1.64597193714751e-23
Cc01_g03450	GSCOC_T00033106001	A0A068URM5	Putative Probable LRR receptor-like serine/threonine-protein kinase At4g08850	GO:0016021;GO:0005524;GO:0004672	AT4G08850	-7.76016517888054	2.13223561612633e-06
Cc09_g02770	GSCOC_T00017631001	A0A068U726	LOB domain-containing protein 1			-7.75749822310272	0.000124765873522294
Cc00_g22640	GSCOC_T00008883001	A0A068VJL3	Indole-3-acetic acid-induced protein ARG7	GO:0009733	AT5G18050	-7.75108236740954	1.76412947531363e-05
Cc02_g09600	GSCOC_T00029636001	A0A068TV37	Putative FUNCTIONS IN			-7.742521142959	7.21983662682167e-05
Cc06_g14690	GSCOC_T00041223001	A0A068U3T8	Cellulose synthase A catalytic subunit 7 [UDP-forming]	GO:0016021;GO:0005886;GO:0016760;GO:0046872;GO:0071555;GO:0030244	AT5G17420	-7.73532725228677	2.51106908780188e-06
Cc01_g19340	GSCOC_T00016071001	A0A068U5S9	Putative ovate family protein 16	GO:0005634;GO:0045892	AT4G14860	-7.7284784659109	2.1422937344603e-06
Cc02_g39760	GSCOC_T00027671001	A0A068UM06	Putative Uncharacterized protein			-7.70190294815316	2.49692497032682e-05
Cc02_g34390	GSCOC_T00000680001	A0A068V9Q9	Putative pectinesterase/pectinesterase inhibitor 22	GO:0045330;GO:0004857;GO:0030599;GO:0042545;GO:0045490	AT3G05620	-7.6952477932519	0.000552331297550931
Cc02_g27550	GSCOC_T00025086001	A0A068UGS1	DNA-damage-repair/toleration protein DRT100		AT3G12610	-7.69404060736316	4.13515916784745e-06
Cc11_g06460	GSCOC_T00020659001	A0A068UD31	Cation/H( ) antiporter 20	GO:0016021;GO:0015299	AT3G53720	-7.68869378924388	4.33607142911613e-05
Cc06_g19180	GSCOC_T00028970001	A0A068UMM2	Putative unknown protein; Has 26 Blast hits to 26 proteins in 11 species			-7.67532497318868	0.000616543828866625
Cc06_g03600	GSCOC_T00023646001	A0A068UEW8	Probable beta-1,4-xylosyltransferase IRX9	GO:0000139;GO:0016021;GO:0015018;GO:0042285;GO:0071555;GO:0010417;GO:0009834		-7.66808656861497	0.000295910737869867
Cc08_g04710	GSCOC_T00042505001	A0A068V397	Putative TRAF-like family protein			-7.66334505259582	0.000728782460930236
Cc06_g08330	GSCOC_T00031146001	A0A068US15	Putative Equilibrative nucleoside transporter 3	GO:0016021;GO:0005337		-7.64711743570657	2.41454120737974e-05
Cc10_g06580	GSCOC_T00034636001	A0A068U0I7	Putative Transcription factor bHLH96	GO:0046983	AT1G72210	-7.64238114330703	1.84534697116155e-05
Cc00_g24930	GSCOC_T00008810001	A0A068VKL0	Hypothetical protein	GO:0016021		-7.62538320409415	8.65307363580829e-05
Cc11_g04780	GSCOC_T00042910001	A0A068V3X6	SAUR-like auxin-responsive protein family	GO:0009733		-7.60894483941403	3.03427740910654e-05
Cc02_g23370	GSCOC_T00015030001	A0A068TQJ3	Protein of unknown function (DUF579)	GO:0045492		-7.60311642530292	0.000152111765237655
Cc11_g05920	GSCOC_T00020568001	A0A068UBB8	Probable transmembrane ascorbate ferrireductase 3	GO:0016021;GO:0016491	AT1G14730	-7.58866107734496	1.52015072052019e-06
Cc03_g15180	GSCOC_T00026781001	A0A068UHX0	Cytochrome P450 71A2	GO:0016021;GO:0020037;GO:0005506;GO:0016705	AT3G48270	-7.5761183649818	8.71251111196643e-18
Cc00_g02160	GSCOC_T00001858001	A0A068V9N6	Hypothetical protein			-7.55975580822644	2.55644585068683e-06
Cc07_g09120	GSCOC_T00040308001	A0A068U3D1	Anthocyanidin 3-O-glucosyltransferase 5	GO:0008194	AT3G50740	-7.54982031829007	3.86206697225613e-05
Cc00_g27820	GSCOC_T00006800001	A0A068VLH0	Putative Vinorine synthase	GO:0016747		-7.54752146508979	0.000244544975246991
Cc01_g10980	GSCOC_T00024214001	A0A068UHI1	Uncharacterized membrane protein At1g06890	GO:0016021	AT2G28315	-7.54075779453375	2.34974585261632e-05
Cc03_g03710	GSCOC_T00026070001	A0A068TSM9	Putative uncharacterized protein			-7.53974067375653	0.000364094647698692
Cc00_g11290	GSCOC_T00007148001	A0A068VGG1	Putative Bark storage protein A	GO:0003824;GO:0009116		-7.53521028788875	0.000200652644174845
Cc11_g06730	GSCOC_T00020698001	A0A068UAI3	Putative LRR receptor-like serine/threonine-protein kinase ERECTA	GO:0016021	AT2G33030	-7.53216481180157	7.19071426644638e-10
Cc11_g04900	GSCOC_T00042936001	A0A068V449	Putative Pectinesterase 2	GO:0045330;GO:0004857;GO:0030599;GO:0042545;GO:0045490		-7.51956403536729	7.2737220102069e-05
Cc02_g13200	GSCOC_T00029187001	A0A068TU42	Putative Allantoinase	GO:0005783;GO:0016021;GO:0004038;GO:0050897;GO:0008270;GO:0000256;GO:0006995;GO:0006145;GO:0010136	AT4G04955	-7.51878272449013	2.04599229785083e-05
Cc11_g04630	GSCOC_T00004822001	A0A068V8K8	unknown protein; INVOLVED IN			-7.51830277538451	5.84638469572749e-41
Cc09_g09900	GSCOC_T00041120001	A0A068V3X8	Putative Protein SRG1	GO:0046872;GO:0016491		-7.50987950644247	7.22394718984004e-05
Cc01_g00170	GSCOC_T00012417001	A0A068VCY0	Putative Cytochrome P450	GO:0016021;GO:0020037;GO:0005506;GO:0004497;GO:0016705	AT5G36130	-7.49801318230718	0.00018467500136885
Cc03_g10110	GSCOC_T00031013001	A0A068UPG6	Splicing factor U2af small subunit B	GO:0089701;GO:0046872;GO:0003723;GO:0000398		-7.48904729840678	0.000115321188723382
Cc08_g15670	GSCOC_T00035507001	A0A068UUZ2	Probable inactive receptor kinase At4g23740	GO:0016021;GO:0005886;GO:0005524;GO:0004672	AT4G23740	-7.48797894807537	3.43497897962077e-06
Cc11_g14380	GSCOC_T00032065001	A0A068TVF1	Putative Auxin-induced protein 5NG4	GO:0016021;GO:0022857		-7.4871504213725	7.00081871775567e-05
Cc05_g09310	GSCOC_T00002647001	A0A068VGC9	Putative uncharacterized protein		AT2G42840	-7.48710691278251	2.86087719254709e-19
Cc00_g00240	GSCOC_T00036101001	A0A068UVQ1	UDP-glycosyltransferase 86A1	GO:0008194	AT2G36970	-7.44732532797832	0.00891570689710672
Cc06_g13590	GSCOC_T00041375001	A0A068U453	Pathogenesis-related protein PR-1	GO:0005576	AT2G14610	-7.43209126730811	3.40704694795912e-06
Cc06_g20360	GSCOC_T00022963001	A0A068UCI3	Bifunctional inhibitor/lipid-transfer protein/seed storage 2S albumin superfamily protein		AT4G12470	-7.42116169258229	7.07708383038018e-34
Cc02_g23880	GSCOC_T00015092001	A0A068TP59	ABC transporter G family member 11	GO:0016021;GO:0005524;GO:0016887	AT1G17840	-7.41868691604805	4.00418923761952e-06
Cc06_g10750	GSCOC_T00041738001	A0A068U6L1	Nudix hydrolase 8	GO:0016787		-7.41363141109097	8.47949630582611e-05
Cc11_g14560	GSCOC_T00032042001	A0A068TXY9	Probable xyloglucan endotransglucosylase/hydrolase protein 33	GO:0048046;GO:0005618;GO:0005887;GO:0004553;GO:0016762;GO:0042546;GO:0009831;GO:0010411		-7.39970174860289	4.15384591785278e-05
Cc01_g10170	GSCOC_T00024099001	A0A068UFE8	Putative Uncharacterized protein At1g08160	GO:0016021		-7.39774143877835	0.000115312462436833
Cc00_g13630	GSCOC_T00009320001	A0A068VH58	Hypothetical protein			-7.39645834619528	3.65954678272899e-16
Cc02_g27290	GSCOC_T00025056001	A0A068UHP9	Furcatin hydrolase	GO:0004553;GO:0005975	AT5G44640	-7.38789693569337	2.43925983328775e-08
Cc05_g09250	GSCOC_T00002655001	A0A068VDX1	Floral homeotic protein AGAMOUS	GO:0005634;GO:0003700;GO:0046983;GO:0000977;GO:0045944		-7.37892375217974	8.27962467229272e-05
Cc04_g05320	GSCOC_T00022281001	A0A068TPV3	Putative Protein ASPARTIC PROTEASE IN GUARD CELL 2	GO:0004190	AT5G10770	-7.37547785932524	1.54616083187998e-09
Cc01_g08280	GSCOC_T00015531001	A0A068V517	Putative Receptor-like protein 12	GO:0016021		-7.36567784953319	4.19852963609804e-06
Cc00_g05990	GSCOC_T00000120001	A0A068VD74	Putative Probable leucine-rich repeat receptor-like protein kinase At1g35710	GO:0016021;GO:0005524;GO:0004672		-7.34700639940535	0.000914553580122653
Cc02_g19540	GSCOC_T00014522001	A0A068TLR5	Hypothetical protein			-7.34653306470714	5.29755986285774e-08
Cc00_g04170	GSCOC_T00006610001	A0A068VCH1	Thymidine kinase	GO:0005524;GO:0042802;GO:0004797;GO:0071897;GO:0006302;GO:0010225		-7.34613882159656	0.000238039734056743
Cc04_g15630	GSCOC_T00042339001	A0A068V2I1	Putative Sex determination protein tasselseed-2			-7.32377155760309	0.00140997582069705
Cc11_g06030	GSCOC_T00020585001	A0A068UAB6	Putative Ankyrin repeat family protein	GO:0016021		-7.32335705906489	0.000204453576670009
Cc02_g14530	GSCOC_T00013864001	A0A068TLG0	Putative GDSL esterase/lipase At1g28570	GO:0016298;GO:0006629	AT1G28570	-7.3169511925946	0.000847161676349918
Cc02_g30100	GSCOC_T00038963001	A0A068V013	Cytokinin dehydrogenase 9	GO:0019139;GO:0071949;GO:0009690	AT2G41510	-7.30305101902348	5.1058848291158e-09
Cc11_g06770	GSCOC_T00020703001	A0A068UBL5	Putative Receptor-like protein 12	GO:0016021	AT1G80080	-7.29718649560414	3.13070121840092e-05
Cc02_g39730	GSCOC_T00027676001	A0A068UJK4	Ras-related protein RABA3	GO:0005525;GO:0003924	AT1G01200	-7.29659935190409	3.88738125343887e-10
Cc06_g10710	GSCOC_T00041744001	A0A068U4M8	Leucine-rich repeat (LRR) family protein	GO:0016021		-7.27518954810144	2.11030254562917e-05
Cc11_g07840	GSCOC_T00032958001	A0A068TX30	Putative Probable LRR receptor-like serine/threonine-protein kinase At3g47570	GO:0016021;GO:0005524;GO:0004674		-7.26586720516841	0.000258875674604726
Cc07_g03490	GSCOC_T00039583001	A0A068U265	Expansin-A15	GO:0005618;GO:0005576;GO:0016020;GO:0009664	AT2G03090	-7.26354047338916	8.71251111196643e-18
Cc00_g15670	GSCOC_T00008808001	A0A068VH45	Putative Omega-hydroxypalmitate O-feruloyl transferase	GO:0005737;GO:0005634;GO:0016747;GO:0009567		-7.26104925155587	1.36730131766599e-49
Cc00_g13740	GSCOC_T00013297001	A0A068VGT5	Probable pectinesterase/pectinesterase inhibitor 12	GO:0045330;GO:0004857;GO:0030599;GO:0042545;GO:0045490;GO:0009617		-7.25469869157392	0.000730144372873951
Cc02_g12140	GSCOC_T00029328001	A0A068TWE8	Calcium-binding protein PBP1	GO:0005509		-7.25170515556648	0.000289082799232095
Cc11_g16080	GSCOC_T00038139001	A0A068UY91	Putative CONTAINS InterPro DOMAIN/s	GO:0010088	AT3G01680	-7.24807139776654	5.85747858641227e-10
Cc02_g16150	GSCOC_T00014092001	A0A068TL17	Putative GDSL esterase/lipase At1g29670	GO:0016788		-7.23488453922648	0.000495489311168795
Cc07_g16350	GSCOC_T00037571001	A0A068UWH0	Putative Cytochrome P450 86B1	GO:0020037;GO:0005506;GO:0004497;GO:0016705	AT1G57750	-7.23359179869563	4.05054262285977e-08
Cc06_g20370	GSCOC_T00022965001	A0A068UCR1	Putative uncharacterized protein			-7.22254224908858	0.00380335702929594
Cc06_g01150	GSCOC_T00023326001	A0A068UE24	Plant protein of unknown function (DUF828)	GO:0016021	AT5G01360	-7.22013000184742	8.88190245658095e-05
Cc10_g15980	GSCOC_T00033803001	A0A068UTD0	Endoglucanase 9	GO:0008810;GO:0030245		-7.21828030152304	0.00082014114301148
Cc08_g01760	GSCOC_T00038338001	A0A068UYL6	Putative invertase inhibitor	GO:0004857		-7.20606363456655	8.27562414434422e-37
Cc09_g04750	GSCOC_T00017386001	A0A068U904	Putative uncharacterized protein			-7.19303707707785	0.00332275713320728
Cc00_g01060	GSCOC_T00015884001	A0A068V564	Putative Receptor-like protein kinase FERONIA	GO:0016021		-7.18696465337463	0.000521010973788055
Cc06_g22200	GSCOC_T00017165001	A0A068V6F6	Phospholipase A2-alpha	GO:0005576;GO:0005794;GO:0005509;GO:0004623;GO:0050482;GO:0016042;GO:0006644		-7.18431945018328	5.01057743733611e-05
Cc00_g18970	GSCOC_T00003156001	A0A068VI35	Putative suppressor of npr1-1 constitutive 4			-7.17595169543798	0.00310041736028166
Cc11_g10730	GSCOC_T00032540001	A0A068TWC4	Probable transmembrane ascorbate ferrireductase 4	GO:0016021;GO:0016491		-7.1740890404642	0.000232978421370665
Cc04_g06890	GSCOC_T00022490001	A0A068TST2	Probable non-specific lipid-transfer protein AKCS9	GO:0006869		-7.16889654336523	0.00709689483523576
Cc05_g02500	GSCOC_T00020945001	A0A068UDN1	GDSL esterase/lipase At2g04570	GO:0016788	AT2G04570	-7.1648621207989	3.43386207655231e-28
Cc06_g14270	GSCOC_T00041278001	A0A068U2Z5	Putative Late embryogenesis abundant (LEA) hydroxyproline-rich glycoprotein family	GO:0016021		-7.15179594555774	1.60210700681348e-06
Cc02_g14630	GSCOC_T00013881001	A0A068TLG8	Putative FUNCTIONS IN	GO:0008017;GO:0043622;GO:0048446		-7.14885133444303	0.000291683622003677
Cc01_g07220	GSCOC_T00030150001	A0A068UMR4	Hypothetical protein	GO:0016021		-7.14607210638425	0.000543259870248414
Cc02_g28330	GSCOC_T00025208001	A0A068UJL5	Protein of unknown function, DUF642			-7.14522584916664	4.52228914747046e-13
Cc04_g13790	GSCOC_T00035886001	A0A068UVD4	Putative Probable serine/threonine-protein kinase Cx32, chloroplastic	GO:0005524;GO:0004674		-7.12725753735343	0.000468011440352053
Cc00_g31790	GSCOC_T00011706001	A0A068VMM9	Putative Probable leucine-rich repeat receptor-like protein kinase At1g35710		AT1G35710	-7.11403041961022	4.6354792355781e-06
Cc02_g36020	GSCOC_T00042760001	A0A068V2Z8	Putative Probable peptide/nitrate transporter At1g59740	GO:0016021;GO:0022857	AT1G59740	-7.11327817189051	3.39390217096138e-15
Cc11_g12980	GSCOC_T00032242001	A0A068TVR3	Putative Vacuolar amino acid transporter 1	GO:0016021		-7.11162397139504	5.60030407102804e-07
Cc07_g20410	GSCOC_T00015692001	A0A068V4N5	Putative Receptor-like protein 12	GO:0016021	AT2G33030	-7.09603714969878	1.40902826356215e-16
Cc09_g03480	GSCOC_T00017544001	A0A068U6S3	Putative auxin efflux carrier component 8	GO:0016021;GO:0009734;GO:0055085		-7.09044046632679	0.00213226932471863
Cc11_g13960	GSCOC_T00032120001	A0A068TY27	Putative ARM repeat superfamily protein	GO:0005874;GO:0008017	AT1G27210	-7.08903527751521	5.49118968101012e-06
Cc02_g35490	GSCOC_T00042841001	A0A068V5U1	Polygalacturonase At1g48100	GO:0005576;GO:0004650;GO:0005975;GO:0071555		-7.08597134032358	0.00537681511021341
Cc10_g14210	GSCOC_T00012011001	A0A068VCI7	LRR receptor-like serine/threonine-protein kinase RCH1	GO:0016021;GO:0005524;GO:0004672	AT5G48940	-7.07367074842396	1.42362534914954e-16
Cc03_g14760	GSCOC_T00026711001	A0A068UIJ1	Putative Probable disease resistance protein At4g27220	GO:0043531		-7.06494716928095	0.000477593328625154
Cc10_g14420	GSCOC_T00006175001	A0A068VFN4	Putative 17.6 kDa class I heat shock protein	GO:0016021		-7.06447602572909	0.00166375355719354
Cc00_g22470	GSCOC_T00009593001	A0A068VJX4	COBRA-like protein 4	GO:0031225;GO:0016021;GO:0010215		-7.05257535775509	0.00124491222653576
Cc08_g09920	GSCOC_T00026947001	A0A068UID0	Amino acid permease 8	GO:0016021		-7.04338587428066	0.0061523021051098
Cc02_g01840	GSCOC_T00020020001	A0A068U949	Bidirectional sugar transporter SWEET3	GO:0016021;GO:0008643	AT5G53190	-7.04029160449785	2.04731528943582e-14
Cc01_g07050	GSCOC_T00030125001	A0A068UNA9	Protein of Unknown Function (DUF239)			-7.00546329215378	0.00646727399391631
Cc11_g06820	GSCOC_T00020710001	A0A068UBM1	Putative LRR receptor-like serine/threonine-protein kinase GSO1	GO:0016021		-7.00317830184998	0.000627455629206925
Cc00_g21480	GSCOC_T00011324001	A0A068VJ99	Putative Receptor-like protein kinase			-6.98536323966435	0.000580372669489712
Cc05_g05080	GSCOC_T00035060001	A0A068UTF2	Cytochrome P450 71D10	GO:0020037;GO:0005506;GO:0004497;GO:0016705	AT3G26310	-6.98234058904593	6.86663422627676e-12
Cc08_g15410	GSCOC_T00035470001	A0A068UUJ3	Putative Probable membrane-associated kinase regulator 2	GO:0005886		-6.97999768537777	0.00221175835980295
Cc02_g05420	GSCOC_T00039050001	A0A068UZQ6	Expansin-A4	GO:0005618;GO:0005576;GO:0016020;GO:0009664	AT2G40610	-6.9656287074788	8.24998461946567e-26
Cc11_g10090	GSCOC_T00032626001	A0A068TWF2	Putative Auxin-induced protein 5NG4	GO:0016021;GO:0022857		-6.94780812898418	0.00103910895285592
Cc05_g01210	GSCOC_T00000928001	A0A068VCP4	Putative uncharacterized protein			-6.94630301057578	1.51998212223631e-07
Cc10_g06570	GSCOC_T00034637001	A0A068TYX1	Putative E3 ubiquitin-protein ligase ATL15	GO:0016021		-6.94627740622143	0.00842557856459682
Cc08_g15180	GSCOC_T00035444001	A0A068UWQ0	myb domain protein 103	GO:0005634;GO:0003677		-6.94625494093204	0.00517840082234691
Cc07_g06260	GSCOC_T00039925001	A0A068U1X5	Protein of unknown function (DUF579)	GO:0016021;GO:0045492	AT5G67210	-6.94101987786224	1.35526391211989e-05
Cc08_g05610	GSCOC_T00024342001	A0A068UG18	Probable carotenoid cleavage dioxygenase 4, chloroplastic	GO:0046872;GO:0016702	AT4G19170	-6.93417516604848	1.60030928860858e-22
Cc01_g08260	GSCOC_T00015526001	A0A068V4W7	Putative Receptor-like protein 12	GO:0016021		-6.92540690945831	0.00140991556282013
Cc01_g08910	GSCOC_T00023929001	A0A068UEI3	Putative Pollen Ole e 1 allergen and extensin family protein			-6.91753452653525	5.87444785582667e-21
Cc06_g06050	GSCOC_T00043176001	A0A068V6C3	unknown protein; Has 68 Blast hits to 67 proteins in 21 species			-6.91708262707248	0.00182698158288156
Cc00_g15340	GSCOC_T00004237001	A0A068VH00	Putative LRR receptor-like serine/threonine-protein kinase FLS2			-6.91568182441919	0.00348904592396693
Cc08_g12160	GSCOC_T00030518001	A0A068UQV0	Ethylene-responsive transcription factor ERF039	GO:0005634;GO:0003677;GO:0003700		-6.91170911352876	0.00345087174262511
Cc07_g05200	GSCOC_T00039786001	A0A068U1K0	Putative Probable calcium-binding protein CML41	GO:0005509	AT3G50770	-6.88610309127996	4.26811789971074e-17
Cc01_g09730	GSCOC_T00024037001	A0A068UH50	Uncharacterized protein At5g22580		AT5G22580	-6.88297864902099	2.53824151848231e-20
Cc02_g00220	GSCOC_T00019798001	A0A068UBA4	Syntaxin-22	GO:0016021;GO:0005770;GO:0030140;GO:0005484;GO:0045324;GO:0006623	AT5G46860	-6.88100904233189	2.98112462594078e-33
Cc08_g00740	GSCOC_T00038473001	A0A068UZ34	Ethylene-responsive transcription factor SHINE 3	GO:0005634;GO:0003677;GO:0003700	AT5G25390	-6.87314534985805	7.44462504989472e-13
Cc07_g12620	GSCOC_T00036850001	A0A068U0B0	Putative unknown protein; FUNCTIONS IN			-6.86656099999399	0.00197666318311277
Cc05_g06730	GSCOC_T00042182001	A0A068V293	Putative uncharacterized protein			-6.86336961224939	2.49825273075727e-33
Cc03_g04160	GSCOC_T00026125001	A0A068TST5	Putative uncharacterized protein		AT3G22800	-6.86142708036007	3.97394740767231e-09
Cc08_g13370	GSCOC_T00030352001	A0A068UNJ0	Predicted protein (Fragment)			-6.85670944575084	3.30680119698402e-31
Cc06_g22950	GSCOC_T00040648001	A0A068V193	Putative Patatin group A-3	GO:0006629		-6.85349994969295	0.00467298243087382
Cc04_g10740	GSCOC_T00042644001	A0A068V348	Probable pectate lyase 22	GO:0046872;GO:0030570;GO:0045490	AT5G63180	-6.84406773170882	4.30972125023026e-15
Cc07_g17000	GSCOC_T00037487001	A0A068UWB1	Putative Auxin-induced protein 5NG4	GO:0016021;GO:0022857		-6.8279398756086	0.00314470329324682
Cc02_g15640	GSCOC_T00014019001	A0A068TKN2	Putative Plant protein of unknown function (DUF641)	GO:0009959;GO:0009639		-6.81922120912362	0.00129161116387039
Cc03_g03610	GSCOC_T00026054001	A0A068TSL7	Thermospermine synthase ACAULIS5	GO:0016740;GO:0006596		-6.81865573369158	0.00210345580147834
Cc11_g05230	GSCOC_T00020465001	A0A068UA46	Putative unknown protein; BEST Arabidopsis thaliana protein match is	GO:0007143;GO:0007140	AT5G48720	-6.81327822896349	1.42768457713001e-19
Cc11_g05950	GSCOC_T00020572001	A0A068UB43	Putative Ankyrin repeat family protein	GO:0016021		-6.81289530686504	1.96017742760729e-06
Cc02_g27000	GSCOC_T00025013001	A0A068UGM3	Putative Cysteine/Histidine-rich C1 domain family protein			-6.79859130956091	0.00134527708955513
Cc02_g05610	GSCOC_T00039074001	A0A068UZF9	Putative uncharacterized protein			-6.79545936040639	1.45903858390994e-18
Cc07_g19230	GSCOC_T00018619001	A0A068U8U6	Putative UDP-glycosyltransferase 85A1	GO:0008194		-6.7903206857437	9.8973054044871e-05
Cc00_g03780	GSCOC_T00002036001	A0A068VBZ5	AAA-ATPase 1	GO:0005524	AT5G40010	-6.78587393233986	1.20884592775154e-17
Cc02_g11660	GSCOC_T00029384001	A0A068TU18	Probable xyloglucan endotransglucosylase/hydrolase protein 8	GO:0048046;GO:0005618;GO:0004553;GO:0016762;GO:0042546;GO:0071555;GO:0010411	AT1G11545	-6.78112233023227	1.2378614244589e-15
Cc11_g06780	GSCOC_T00020704001	A0A068UAI7	Putative Probable LRR receptor-like serine/threonine-protein kinase At4g08850	GO:0016021		-6.77987173967327	0.0007056047999215
Cc01_g02930	GSCOC_T00013234001	A0A068VAH2	G-type lectin S-receptor-like serine/threonine-protein kinase At1g11330	GO:0005524;GO:0004672	AT1G11330	-6.7751299306349	0.000120770861287989
Cc03_g09600	GSCOC_T00030944001	A0A068UP28	Putative Transcription factor bHLH77	GO:0046983;GO:0006355	AT3G23690	-6.77374357149916	1.57229560673549e-15
Cc00_g14020	GSCOC_T00010024001	A0A068VH99	3-ketoacyl-CoA synthase 21	GO:0016021;GO:0016747;GO:0006633	AT5G04530	-6.7720856763902	3.23479919694082e-28
Cc11_g14370	GSCOC_T00032066001	A0A068TW24	MLP-like protein 423	GO:0010427;GO:0004864;GO:0038023;GO:0009738;GO:0006952	AT1G24020	-6.75568100058491	1.51180490921238e-14
Cc00_g31950	GSCOC_T00011914001	A0A068VM42	Tropinone reductase 2			-6.75503696305368	0.00928345953707946
Cc08_g08050	GSCOC_T00013081001	A0A068VEL3	Putative methyltransferases	GO:0016021		-6.74434706988958	1.71426570233626e-22
Cc07_g15610	GSCOC_T00036455001	A0A068U1C7	L-ascorbate oxidase	GO:0005576;GO:0005507;GO:0016491		-6.74369652935126	8.28164106660923e-10
Cc00_g05670	GSCOC_T00011952001	A0A068VD26	Putative uncharacterized protein		AT4G34880	-6.73934867094603	1.05573206728785e-10
Cc03_g01760	GSCOC_T00025801001	A0A068TS39	unknown protein; Has 91 Blast hits to 91 proteins in 12 species	GO:0016021		-6.72068693906051	1.77853390486856e-09
Cc06_g18700	GSCOC_T00040496001	A0A068V0E0	Probable tocopherol O-methyltransferase, chloroplastic	GO:0008168;GO:0032259		-6.71480475425691	0.00586444124519769
Cc00_g14140	GSCOC_T00004713001	A0A068VH92	Dynamin-related protein 4C	GO:0005525;GO:0003924	AT1G60500	-6.7146213197804	5.98453824330448e-26
Cc07_g10480	GSCOC_T00037111001	A0A068U084	Lactoylglutathione lyase / glyoxalase I family protein	GO:0004462;GO:0046872		-6.71418451535254	3.54589507126249e-44
Cc10_g14530	GSCOC_T00033590001	A0A068USZ1	Putative uncharacterized protein	GO:0005199;GO:0009664		-6.70540487417646	6.12177486808914e-31
Cc01_g19080	GSCOC_T00016105001	A0A068U7S8	Putative Chlorophyllase-1	GO:0047746;GO:0015996	AT1G19670	-6.69529029342594	1.06487062958326e-43
Cc00_g26240	GSCOC_T00012616001	A0A068VL28	Putative Probable peptide transporter At1g52190	GO:0016021;GO:0022857	AT1G52190	-6.68259389455344	8.31525039509579e-13
Cc10_g02380	GSCOC_T00024739001	A0A068UIL7	Cytokinin dehydrogenase 5	GO:0019139;GO:0071949;GO:0009690	AT1G75450	-6.67923782107888	8.35320504763657e-19
Cc00_g25750	GSCOC_T00013351001	A0A068VNF9	Putative Disease resistance protein RGA2	GO:0043531;GO:0006952		-6.67310378747916	0.000291292761577351
Cc00_g22520	GSCOC_T00000523001	A0A068VJX9	Probable indole-3-acetic acid-amido synthetase GH3.1		AT2G14960	-6.66516615878234	6.09351107002862e-12
Cc03_g01560	GSCOC_T00025771001	A0A068TS21	Putative Epoxide hydrolase 2	GO:0003824		-6.65606289376564	0.000289576610118585
Cc06_g16760	GSCOC_T00004127001	A0A068VG24	Thiol protease SEN102	GO:0008234		-6.65451401477192	0.00433632676199861
Cc02_g14600	GSCOC_T00013876001	A0A068TKQ4	unknown protein; Has 209 Blast hits to 205 proteins in 54 species	GO:0016021		-6.64706300677415	0.00297926015250758
Cc08_g07400	GSCOC_T00025366001	A0A068UHD9	Premnaspirodiene oxygenase	GO:0020037;GO:0005506;GO:0016705		-6.63961257033245	0.0090477851112909
Cc07_g09110	GSCOC_T00040307001	A0A068U2T4	Putative Anthocyanidin 3-O-glucosyltransferase 5	GO:0008194		-6.63832538307964	0.00301327341133507
Cc08_g07010	GSCOC_T00025295001	A0A068UHT3	Putative Patatin group A-3	GO:0016787;GO:0016042	AT2G26560	-6.63110016136319	3.04569159296239e-23
Cc11_g04910	GSCOC_T00042937001	A0A068V3C2	Probable pectinesterase/pectinesterase inhibitor 40	GO:0045330;GO:0004857;GO:0030599;GO:0042545;GO:0045490	AT4G02320	-6.62920188655698	1.23065360396927e-06
Cc02_g09150	GSCOC_T00029696001	A0A068TV77	GDSL esterase/lipase At5g33370	GO:0016788		-6.62786661968637	0.000512557484858465
Cc02_g35160	GSCOC_T00042892001	A0A068V3N4	Putative Rab9 effector protein with kelch motifs			-6.62434505025357	0.00317480889962916
Cc11_g04880	GSCOC_T00042930001	A0A068V3Y5	Putative Isoflavone 2'-hydroxylase	GO:0020037;GO:0005506;GO:0004497;GO:0016705		-6.61442074712425	0.000443353988052195
Cc06_g12080	GSCOC_T00041578001	A0A068U3G1	Auxin-binding protein ABP20	GO:0048046;GO:0005618;GO:0030145;GO:0045735	AT5G20630	-6.60604617430812	8.64330488978181e-35
Cc10_g03730	GSCOC_T00024910001	A0A068UJ00	Lysine histidine transporter-like 8	GO:0016021		-6.58900134158841	5.70310008983624e-05
Cc08_g01330	GSCOC_T00038402001	A0A068UY26	Putative unknown protein; BEST Arabidopsis thaliana protein match is	GO:0009734		-6.5880852998028	0.00314868903942114
Cc01_g11120	GSCOC_T00024230001	A0A068UFR4	Putative unknown protein; Has 18 Blast hits to 18 proteins in 5 species	GO:0016021		-6.57616542001659	0.00145399807079707
Cc03_g02790	GSCOC_T00025948001	A0A068TRL8	Putative S-adenosylmethionine decarboxylase proenzyme	GO:0004014;GO:0006557;GO:0008295;GO:0006597		-6.5750732689458	0.00457447143752144
Cc07_g09400	GSCOC_T00037248001	A0A068U1I6	Sulfite exporter TauE/SafE family protein	GO:0016021	AT2G25737	-6.56533699228993	1.67278613470557e-21
Cc05_g08980	GSCOC_T00016940001	A0A068V600	Putative G-type lectin S-receptor-like serine/threonine-protein kinase SD2-5	GO:0016021;GO:0005524;GO:0004674		-6.56451924345511	0.000243272170333298
Cc10_g09750	GSCOC_T00031505001	A0A068UQB9	Probable peptide/nitrate transporter At1g22540	GO:0016021;GO:0022857	AT1G22540	-6.56352630698362	2.87938529339989e-47
Cc09_g05770	GSCOC_T00033420001	A0A068US85	Putative Subtilisin-like protease	GO:0004252		-6.55961510766349	0.00523117146447545
Cc08_g04660	GSCOC_T00004723001	A0A068VHH1	Putative Cytosolic sulfotransferase 15	GO:0008146	AT5G07010	-6.54641602121727	3.57945536490757e-20
Cc00_g29810	GSCOC_T00010430001	A0A068VM19	NAD(P)-binding Rossmann-fold superfamily protein		AT1G15950	-6.53918112665908	1.20110595393986e-12
Cc06_g12890	GSCOC_T00041479001	A0A068U4D1	Hypothetical protein			-6.53674059199135	2.29335738298481e-11
Cc05_g00750	GSCOC_T00013165001	A0A068VAI9	Putative Acidic endochitinase	GO:0005975	AT5G24090	-6.52868382776044	1.25070316828579e-17
Cc08_g10470	GSCOC_T00027015001	A0A068UIG9	Putative UPF0481 protein At3g47200	GO:0016021		-6.52602486865198	0.000301106765758964
Cc03_g14170	GSCOC_T00031810001	A0A068URI3	unknown protein; FUNCTIONS IN			-6.52557946564977	0.00414527171055031
Cc02_g01620	GSCOC_T00019989001	A0A068UBP8	Probable pectinesterase/pectinesterase inhibitor 34	GO:0016021;GO:0045330;GO:0004857;GO:0030599;GO:0042545;GO:0045490	AT3G49220	-6.52065537957808	5.8569169405622e-19
Cc04_g01380	GSCOC_T00021788001	A0A068TP95	Putative myb domain protein 7	GO:0005634;GO:0003677	AT1G22640	-6.51634182671188	2.6212900550997e-07
Cc11_g07490	GSCOC_T00018048001	A0A068V8P1	Putative Leucine-rich repeat receptor protein kinase EXS	GO:0016021	AT5G53320	-6.51453865617721	1.79841141734077e-13
Cc02_g16790	GSCOC_T00014174001	A0A068TKX6	Auxin-induced protein 15A	GO:0009733	AT4G34760	-6.51407769974968	0.00431778638682043
Cc11_g08860	GSCOC_T00032818001	A0A068TZH8	Putative uncharacterized protein	GO:0046872;GO:0030001	AT1G23000	-6.50765915271468	1.98234583572041e-09
Cc01_g03940	GSCOC_T00040884001	A0A068V3G8	Putative G-type lectin S-receptor-like serine/threonine-protein kinase RLK1	GO:0016021		-6.49808811341356	0.00568289885014028
Cc01_g16750	GSCOC_T00016404001	A0A068U5X1	Hypothetical protein	GO:0016021;GO:0005384;GO:0030026		-6.4952497063834	0.00829922798487734
Cc03_g04880	GSCOC_T00026219001	A0A068TTA3	Putative TPX2 (targeting protein for Xklp2) protein family		AT3G23090	-6.49317757905164	1.99843217128934e-05
Cc07_g19210	GSCOC_T00018623001	A0A068U7W7	Putative SAUR-like auxin-responsive protein family	GO:0009733		-6.49213116739774	0.00049664817514968
Cc02_g31960	GSCOC_T00027465001	A0A068UIZ3	Putative LRR receptor-like serine/threonine-protein kinase GSO1	GO:0016021;GO:0004672		-6.48482205324108	0.00615154453083558
Cc11_g10950	GSCOC_T00032505001	A0A068TX76	Hypothetical protein			-6.48235564658755	1.16375636780035e-05
Cc05_g00650	GSCOC_T00017108001	A0A068V6D3	Predicted protein	GO:0016021;GO:0045492		-6.45241277024665	0.00693487163606893
Cc07_g13390	GSCOC_T00036742001	A0A068TZB1	Glucan endo-1,3-beta-glucosidase 2	GO:0046658;GO:0004553;GO:0005975	AT1G66250	-6.44142038830888	0.000100835470080697
Cc03_g13420	GSCOC_T00018964001	A0A068V7N7	Hypothetical protein			-6.43794936756101	0.00612833358588657
Cc06_g14230	GSCOC_T00041284001	A0A068U2V1	Putative Late embryogenesis abundant (LEA) hydroxyproline-rich glycoprotein family	GO:0016021		-6.43172086254656	9.68729252265245e-05
Cc05_g09710	GSCOC_T00021548001	A0A068UEV6	Putative Cytochrome b561/ferric reductase transmembrane protein family	GO:0016021;GO:0055114		-6.42942853834554	0.00557526676752378
Cc02_g32040	GSCOC_T00018912001	A0A068V9B9	Leucine-rich repeat receptor-like serine/threonine/tyrosine-protein kinase SOBIR1	GO:0016021;GO:0005524;GO:0004672		-6.42070721562928	0.000830817283442863
Cc11_g11640	GSCOC_T00032419001	A0A068TVZ1	Putative Cytochrome P450 734A1	GO:0016021;GO:0020037;GO:0005506;GO:0004497;GO:0016705		-6.40829624292109	0.00157450983848459
Cc06_g19720	GSCOC_T00029045001	A0A068UMC3	Putative uncharacterized protein			-6.40558250173139	0.00633778851642943
Cc02_g15480	GSCOC_T00013996001	A0A068TLN4	Cellulose synthase A catalytic subunit 8 [UDP-forming]	GO:0005618;GO:0016021;GO:0005886;GO:0016760;GO:0046872;GO:0071555;GO:0030244;GO:0042742;GO:0050832;GO:0009834;GO:0006970;GO:0009414	AT4G18780	-6.40433933855979	2.33954213210289e-05
Cc05_g07530	GSCOC_T00042284001	A0A068V2E6	Putative Extracellular ribonuclease LE	GO:0033897;GO:0003723		-6.40422296534713	0.000507898742855272
Cc00_g18770	GSCOC_T00008464001	A0A068VI08	Putative kinase interacting protein, identical	GO:0003779	AT4G02710	-6.39374036492039	0.00150030563069945
Cc03_g10600	GSCOC_T00004052001	A0A068VHZ2	Putative Probable LRR receptor-like serine/threonine-protein kinase At4g08850		AT4G08850	-6.38231709580324	4.08371797523747e-11
Cc05_g03570	GSCOC_T00003711001	A0A068VKY4	Putative disease resistance protein RGA3	GO:0043531		-6.37989155076229	0.00209646769612616
Cc01_g06280	GSCOC_T00029992001	A0A068UMU9	Glucan endo-1,3-beta-glucosidase, acidic isoform GI9	GO:0016021;GO:0004553;GO:0005975	AT3G57270	-6.36096267275533	0.000224328558543266
Cc06_g08150	GSCOC_T00031166001	A0A068UPS4	Putative Auxin-responsive protein IAA29	GO:0005634;GO:0009734;GO:0006355	AT1G04550	-6.35676220842771	2.02817207876115e-05
Cc08_g12520	GSCOC_T00030470001	A0A068UNR3	Putative Sec14 cytosolic factor			-6.35257084408223	0.000632388322993375
Cc04_g09680	GSCOC_T00005604001	A0A068VBI2	Pyruvate kinase, cytosolic isozyme	GO:0016301;GO:0000287;GO:0030955;GO:0004743		-6.34385416607746	0.00206248976510533
Cc02_g13480	GSCOC_T00029145001	A0A068TU88	Putative arabinogalactan protein 30		AT2G33790	-6.34061686573435	6.67206026498222e-14
Cc02_g24550	GSCOC_T00028870001	A0A068UPD1	Putative uncharacterized protein	GO:0042025;GO:0005634;GO:0003677;GO:0046872		-6.33988145487432	0.000736197188223705
Cc10_g07370	GSCOC_T00034532001	A0A068TYN7	Putative Tetratricopeptide repeat (TPR)-like superfamily protein			-6.32675535408968	0.00312565881843029
Cc00_g35780	GSCOC_T00008950001	A0A068VRA9	Germin-like protein subfamily 1 member 7	GO:0048046;GO:0005618;GO:0030145;GO:0045735		-6.32498748412756	1.72252783949246e-05
Cc04_g16610	GSCOC_T00035767001	A0A068UVM5	Gibberellin-regulated protein 6		AT5G15230	-6.32334200985062	4.6806094288572e-05
Cc08_g16000	GSCOC_T00035548001	A0A068UUD4	Endoglucanase 6	GO:0030246;GO:0008810;GO:0030245;GO:0030246;GO:0008810;GO:0030245	AT1G64390	-6.31501136478904	7.93574977359594e-14
Cc11_g14750	GSCOC_T00032014001	A0A068TW39	Putative Glucan endo-1,3-beta-glucosidase 13	GO:0004553;GO:0005975	AT4G16260	-6.30413220349487	2.45127006462471e-05
Cc02_g12150	GSCOC_T00029326001	A0A068TUH0	Calcium-binding protein PBP1	GO:0005509	AT5G54490	-6.29576962409765	2.00078857555844e-18
Cc05_g02480	GSCOC_T00020948001	A0A068UB14	GDSL esterase/lipase At2g42990	GO:0016021;GO:0016788	AT2G42990	-6.29250844455663	2.80703612028356e-14
Cc03_g14440	GSCOC_T00026661001	A0A068UI79	unknown protein; BEST Arabidopsis thaliana protein match is	GO:0016021		-6.29210685198922	0.00105655392129696
Cc10_g12560	GSCOC_T00031972001	A0A068URN5	Probable peptide/nitrate transporter At5g62680	GO:0016021;GO:0022857	AT5G62680	-6.28653054876311	1.2303197463293e-20
Cc05_g10050	GSCOC_T00021507001	A0A068UD54	Putative Protein kinase G11A	GO:0005524;GO:0004672	AT1G53700	-6.28484143997357	2.82888022706478e-07
Cc00_g34680	GSCOC_T00013105001	A0A068VND8	Putative Probable leucine-rich repeat receptor-like protein kinase At1g35710		AT1G35710	-6.25841401780776	7.08594293534478e-09
Cc05_g02420	GSCOC_T00020978001	A0A068UB96	Fasciclin-like arabinogalactan protein 7	GO:0046658	AT2G04780	-6.24403248688704	2.64378251226292e-10
Cc07_g20340	GSCOC_T00015677001	A0A068V755	Putative Reticuline oxidase-like protein	GO:0071949;GO:0016491	AT5G44440	-6.23753091275321	3.02128782397953e-09
Cc11_g07510	GSCOC_T00018046001	A0A068V6L8	Putative LRR receptor-like serine/threonine-protein kinase GSO1	GO:0016021	AT3G12610	-6.23187502581214	7.25871653327532e-08
Cc02_g04650	GSCOC_T00020383001	A0A068UA64	Putative F-box protein At5g07610			-6.21824370322216	0.00177765835086402
Cc11_g06830	GSCOC_T00020711001	A0A068UAJ1	Putative Leucine-rich repeat receptor-like protein kinase TDR	GO:0016021		-6.20207396606129	0.00125488882414922
Cc07_g12480	GSCOC_T00036867001	A0A068TZS1	Probable acyl-activating enzyme 6	GO:0003824	AT5G16340	-6.19471224343258	3.78093576844381e-07
Cc02_g21770	GSCOC_T00014823001	A0A068TQ32	Putative uncharacterized protein	GO:0046872;GO:0030001	AT5G02600	-6.190527804417	2.894600532485e-15
Cc11_g08120	GSCOC_T00032919001	A0A068TXP3	Protein PLANT CADMIUM RESISTANCE 2	GO:0016021	AT1G14870	-6.18229184903788	5.9420947916327e-13
Cc00_g02690	GSCOC_T00006658001	A0A068VDI7	Putative Subtilisin-like protease	GO:0016021;GO:0004252		-6.17703342721817	1.85813516443209e-06
Cc00_g05040	GSCOC_T00000058001	A0A068VCR1	Hypothetical protein		AT4G02150	-6.16537927835585	5.4373171404118e-08
Cc01_g08630	GSCOC_T00023894001	A0A068UGU7	Putative ovate family protein 6	GO:0005634;GO:0045892	AT3G52525	-6.12577568429882	2.42073681190047e-21
Cc11_g04520	GSCOC_T00004804001	A0A068V856	Putative Probable LRR receptor-like serine/threonine-protein kinase At4g08850			-6.12475325876079	0.00193358577289763
Cc00_g08090	GSCOC_T00006943001	A0A068VEK5	Putative Deacetylvindoline O-acetyltransferase	GO:0016747		-6.11581636977679	1.43223518062955e-18
Cc00_g35890	GSCOC_T00005696001	A0A068VNV4	Polyphenol oxidase I, chloroplastic	GO:0004097;GO:0046872		-6.11577138337369	1.48871213607441e-21
Cc07_g06750	GSCOC_T00039999001	A0A068U202	Subtilisin-like protease	GO:0004252	AT5G67360	-6.10699175421624	3.38918838370919e-25
Cc02_g09340	GSCOC_T00029665001	A0A068TX53	Putative Cytosolic sulfotransferase 5	GO:0008146	AT3G45070	-6.10555354093242	4.94195990308901e-32
Cc01_g10350	GSCOC_T00024125001	A0A068UEN6	Protein of unknown function (DUF1635)			-6.10221955304979	2.70352618980723e-05
Cc11_g17410	GSCOC_T00038308001	A0A068UXX1	NAC domain containing protein 83	GO:0005634;GO:0003677;GO:0006355	AT5G13180	-6.10072364392687	0.000153282966568324
Cc07_g10430	GSCOC_T00037117001	A0A068U088	Probable pectinesterase 53	GO:0045330;GO:0030599;GO:0042545;GO:0045490	AT5G19730	-6.09869907812609	0.000229267167764101
Cc10_g12040	GSCOC_T00031887001	A0A068UQU7	Putative uncharacterized protein	GO:0016021;GO:0005524;GO:0004672	AT4G08850	-6.09841992539013	0.00331516139636162
Cc00_g15310	GSCOC_T00009838001	A0A068VHK7	DNA binding	GO:0017053;GO:0006351		-6.08641030721297	0.00248892778567344
Cc05_g06670	GSCOC_T00042170001	A0A068V1U9	Putative unknown protein; BEST Arabidopsis thaliana protein match is	GO:0016021		-6.07865923100795	1.72233554966796e-13
Cc02_g32420	GSCOC_T00001250001	A0A068VBP2	Histidine-containing phosphotransfer protein 1	GO:0000160	AT3G21510	-6.06824926439108	8.58602875072989e-12
Cc03_g09260	GSCOC_T00042692001	A0A068V390	Putative Probable LRR receptor-like serine/threonine-protein kinase At3g47570	GO:0016021;GO:0005524;GO:0004674		-6.06606639418775	2.27567113795801e-11
Cc11_g11650	GSCOC_T00032418001	A0A068TWZ4	Putative Cytochrome P450 734A1	GO:0020037;GO:0005506;GO:0004497;GO:0016705		-6.06312835787256	0.000712436834280825
Cc02_g14590	GSCOC_T00013872001	A0A068TKG8	GDSL esterase/lipase At5g45910	GO:0016788		-6.06138465547233	0.000439611784551179
Cc10_g14430	GSCOC_T00006176001	A0A068VFY4	Cupredoxin superfamily protein			-6.05774493621547	1.83414301149039e-06
Cc10_g03450	GSCOC_T00024870001	A0A068UG76	Probable calcium-binding protein CML41	GO:0005509	AT3G50770	-6.0370007838618	9.52458116208403e-08
Cc02_g38700	GSCOC_T00027825001	A0A068UKL1	Putative uncharacterized protein			-6.02410735068674	1.3473209035977e-22
Cc07_g16670	GSCOC_T00037533001	A0A068UYZ0	Hypothetical protein	GO:0008083		-6.02034677282513	2.18769151390725e-06
Cc03_g13330	GSCOC_T00018949001	A0A068V9E1	Putative LRR receptor-like serine/threonine-protein kinase EFR	GO:0016021;GO:0005524;GO:0004674		-6.01730479671541	0.00875822842872383
Cc11_g14670	GSCOC_T00032026001	A0A068TVW9	Putative basic helix-loop-helix (bHLH) DNA-binding superfamily protein	GO:0003677;GO:0046983;GO:0006357		-6.0106965983051	0.00654486056861575
Cc07_g15190	GSCOC_T00036507001	A0A068TYS4	Putative BTB/POZ domain-containing protein DOT3		AT5G10250	-5.99246946542881	1.48663894969105e-16
Cc00_g21140	GSCOC_T00000021001	A0A068VJG8	Putative germin-like protein 3-2	GO:0048046;GO:0005618;GO:0030145;GO:0045735		-5.98941933139249	0.00292210336661212
Cc06_g03690	GSCOC_T00023658001	A0A068UGI6	Putative Predicted protein			-5.98667681528771	4.34528308462583e-05
Cc07_g16060	GSCOC_T00037613001	A0A068UXD0	Nuclear transcription factor Y-alpha (Fragment)	GO:0005634;GO:0046982;GO:0043565;GO:0006355	AT4G14540	-5.98664614817618	1.13999667563274e-10
Cc04_g13340	GSCOC_T00018302001	A0A068V6L5	Putative Adenine nucleotide alpha hydrolases-like superfamily protein			-5.97648607198834	0.00308625603247564
Cc08_g07000	GSCOC_T00025292001	A0A068UHB0	BTB/POZ domain-containing protein NPY1	GO:0060918;GO:0099402	AT4G31820	-5.95849108683352	1.09992002481741e-05
Cc09_g08340	GSCOC_T00020786001	A0A068UAW4	Putative Heavy metal transport/detoxification superfamily protein	GO:0046872;GO:0030001		-5.95795437028588	2.88678264100741e-10
Cc08_g02950	GSCOC_T00037797001	A0A068UXQ6	Putative Transcription factor bHLH94	GO:0046983	AT1G72210	-5.94853613555446	2.99857635098659e-15
Cc08_g02340	GSCOC_T00037702001	A0A068UZA9	Nitrate transporter 1.5	GO:0016021;GO:0022857	AT1G32450	-5.94706979364763	6.21706821666018e-09
Cc06_g00560	GSCOC_T00023237001	A0A068UCX2	Putative uncharacterized protein			-5.91477661803881	1.61569087043461e-08
Cc09_g05900	GSCOC_T00033390001	A0A068UUI1	Wall-associated receptor kinase-like 9	GO:0016021;GO:0005524;GO:0004672		-5.89396115851583	1.57846092195131e-05
Cc00_g31820	GSCOC_T00004172001	A0A068VML3	Putative Strictosidine synthase 1	GO:0016844;GO:0009058	AT1G74020	-5.891777644777	1.48022525634333e-07
Cc00_g08520	GSCOC_T00005636001	A0A068VFF6	Putative Cellulose synthase-like protein G3	GO:0016021;GO:0016760;GO:0030244	AT4G23990	-5.88793310099085	3.56210435678935e-15
Cc06_g23480	GSCOC_T00040562001	A0A068V1A4	Hypothetical protein			-5.88531571590912	0.00093153846821004
Cc10_g15400	GSCOC_T00033719001	A0A068USP4	Purine permease 3	GO:0016021;GO:0015211	AT1G28220	-5.87288954402764	2.02811471044552e-19
Cc02_g24810	GSCOC_T00028837001	A0A068UMC9	Putative uncharacterized protein	GO:0005634;GO:0003677;GO:0003700	AT2G44940	-5.87011107040649	2.54690004199086e-13
Cc01_g19450	GSCOC_T00016056001	A0A068U554	Cyclin-P3-1	GO:0019901;GO:0000079	AT3G63120	-5.8700599258617	4.75293755773841e-09
Cc02_g04420	GSCOC_T00020354001	A0A068UCI1	Leucine-rich repeat receptor-like protein kinase TDR	GO:0016021;GO:0005886;GO:0005524;GO:0004674;GO:0051301;GO:0010067;GO:0010223;GO:0010089	AT5G61480	-5.86912298060049	5.42104401051648e-06
Cc02_g19810	GSCOC_T00014556001	A0A068TMQ4	Probable beta-D-xylosidase 5	GO:0004553;GO:0005975	AT3G19620	-5.86727899464055	3.88230505747692e-07
Cc10_g01110	GSCOC_T00024577001	A0A068UFU7	Putative Major facilitator superfamily protein	GO:0016021;GO:0022857		-5.86554973421486	0.000399065540914554
Cc04_g01940	GSCOC_T00021859001	A0A068TRB7	Protein HOTHEAD	GO:0050660;GO:0016614;GO:0007267;GO:0009553;GO:0010430	AT1G72970	-5.86308537544942	1.25425529555549e-11
Cc05_g06660	GSCOC_T00042169001	A0A068V2M9	Putative CK25			-5.84789966099234	0.004581598692202
Cc04_g12440	GSCOC_T00005304001	A0A068V8F9	Protein of Unknown Function (DUF239)			-5.84024562986257	2.04938164380813e-08
Cc07_g18350	GSCOC_T00018764001	A0A068U8X9	Putative ankyrin repeat containing protein, identical	GO:0016021		-5.82795814550898	1.53489055927765e-06
Cc10_g04500	GSCOC_T00034926001	A0A068TYJ8	Putative Remorin family protein			-5.81127797306111	8.21381664066965e-09
Cc07_g06090	GSCOC_T00039904001	A0A068U2W6	unknown protein; FUNCTIONS IN	GO:0016021		-5.80672174440235	0.000424021303999083
Cc10_g11930	GSCOC_T00031872001	A0A068URM1	Filament-like plant protein (Fragment)		AT1G77580	-5.80218663146839	5.59914090161003e-11
Cc07_g09010	GSCOC_T00040294001	A0A068U2S7	Putative unknown protein; BEST Arabidopsis thaliana protein match is			-5.79511376922505	1.6490656042356e-10
Cc09_g06760	GSCOC_T00005134001	A0A068VA94	Putative E3 ubiquitin-protein ligase LIN			-5.79074191567341	3.95731342910738e-16
Cc00_g11810	GSCOC_T00007743001	A0A068VGL7	Putative Protein of unknown function (DUF594)	GO:0016021		-5.78667642468982	0.00163601554489124
Cc08_g04160	GSCOC_T00034227001	A0A068UU40	Putative disease resistance protein RGA3	GO:0043531;GO:0006952		-5.78594545970051	8.84567147884125e-06
Cc04_g16410	GSCOC_T00035736001	A0A068UVK8	Chlorophyll a-b binding protein 4, chloroplastic	GO:0009535;GO:0016021;GO:0009522;GO:0009523;GO:0016168;GO:0009765;GO:0018298	AT3G47470	-5.77506400808457	1.42423036663934e-18
Cc11_g01760	GSCOC_T00019521001	A0A068UAY5	Protein of unknown function, DUF642			-5.77333943993618	1.77853390486856e-09
Cc05_g00260	GSCOC_T00017053001	A0A068V5J6	Putative Probable LRR receptor-like serine/threonine-protein kinase At3g47570	GO:0005524;GO:0004672		-5.76597379093862	0.00855333662898193
Cc02_g17450	GSCOC_T00014261001	A0A068TLC4	Uncharacterized protein	GO:0005634;GO:0003677	AT4G39250	-5.76425909601268	8.16988025414051e-05
Cc02_g39920	GSCOC_T00027642001	A0A068UK09	NAC domain-containing protein 43	GO:0005634;GO:0003677;GO:0006355		-5.74415179581868	0.00234499884666046
Cc01_g04940	GSCOC_T00028571001	A0A068ULG5	ABC transporter G family member 15	GO:0016021;GO:0005524;GO:0016887	AT3G21090	-5.73467757990787	2.72559424249508e-05
Cc05_g05510	GSCOC_T00035120001	A0A068UW58	Xyloglucan endotransglucosylase/hydrolase protein 9	GO:0048046;GO:0005618;GO:0004553;GO:0016762;GO:0042546;GO:0071555;GO:0010411	AT4G03210	-5.73022869785113	6.66838956996703e-12
Cc10_g04910	GSCOC_T00034877001	A0A068TYC0	Probable carbohydrate esterase At4g34215			-5.72249555579261	0.000474632698113692
Cc07_g10490	GSCOC_T00037109001	A0A068U064	Putative ATP binding microtubule motor family protein	GO:0005874;GO:0005524;GO:0008017;GO:0003777;GO:0007018	AT5G66310	-5.71783844333315	7.54210294767915e-21
Cc10_g09820	GSCOC_T00031496001	A0A068USY6	Germin-like protein subfamily 1 member 14	GO:0048046;GO:0005618;GO:0030145;GO:0045735	AT5G39110	-5.71659846855271	1.76519307344105e-09
Cc09_g09020	GSCOC_T00023117001	A0A068UDQ4	Chlorophyll a-b binding protein 21, chloroplastic	GO:0009535;GO:0016021;GO:0009522;GO:0009523;GO:0016168;GO:0009765;GO:0018298	AT1G29930	-5.71145898729591	8.11477087751229e-15
Cc07_g07560	GSCOC_T00040106001	A0A068U2B1	Probable xyloglucan endotransglucosylase/hydrolase protein 6	GO:0048046;GO:0005618;GO:0016021;GO:0004553;GO:0016762;GO:0042546;GO:0071555;GO:0009414;GO:0010411	AT5G65730	-5.71077553370746	0.0009858706563645
Cc10_g01690	GSCOC_T00024654001	A0A068UGR1	Snakin-2			-5.70630870442557	0.00987680321938058
Cc02_g16180	GSCOC_T00014095001	A0A068TLV1	GDSL esterase/lipase At1g29660	GO:0016788	AT1G29670	-5.69384922921205	3.10462631912853e-08
Cc08_g08460	GSCOC_T00009039001	A0A068VC95	Dehydration-responsive protein RD22		AT5G25610	-5.69087153383702	3.78014092559171e-31
Cc03_g00290	GSCOC_T00025607001	A0A068TQZ9	Putative phragmoplast orienting kinesin 1	GO:0005524;GO:0008017;GO:0003777;GO:0007018		-5.68950337208243	0.00800904801633696
Cc04_g00680	GSCOC_T00021691001	A0A068TP42	Pectinesterase/pectinesterase inhibitor U1	GO:0045330;GO:0030599;GO:0042545;GO:0045490	AT3G14310	-5.68931240470505	3.04129794000517e-06
Cc01_g05850	GSCOC_T00027411001	A0A068UJK1	Putative Bidirectional sugar transporter SWEET3	GO:0016021;GO:0008643	AT5G53190	-5.68021807509643	5.53369087783859e-18
Cc04_g07350	GSCOC_T00022548001	A0A068TR73	Putative Protein ASPARTIC PROTEASE IN GUARD CELL 1	GO:0004190;GO:0009737;GO:0009414	AT3G18490	-5.6568899064905	1.42362534914954e-16
Cc06_g17450	GSCOC_T00036396001	A0A068UWM8	Putative Double Clp-N motif-containing P-loop nucleoside triphosphate hydrolases superfamily protein		AT4G29920	-5.65412509657506	1.0254917885723e-09
Cc07_g08590	GSCOC_T00040238001	A0A068U3M4	Putative Probable receptor-like protein kinase At1g67000	GO:0030247		-5.65234731905846	2.38320271278785e-09
Cc06_g09480	GSCOC_T00041909001	A0A068U480	Predicted protein (Fragment)		AT3G24480	-5.6518025987526	8.09984691265927e-23
Cc00_g25070	GSCOC_T00002590001	A0A068VKN0	Endoglucanase 12	GO:0016021;GO:0008810;GO:0030245	AT1G65610	-5.64711722564334	4.9542297619378e-08
Cc00_g28120	GSCOC_T00004031001	A0A068VLJ6	Putative Cytosolic sulfotransferase 15	GO:0008146	AT5G07010	-5.64247508926627	0.00089814806372674
Cc07_g04510	GSCOC_T00039707001	A0A068U1G0	Hypothetical protein			-5.63917864583998	3.33366443698258e-21
Cc08_g07030	GSCOC_T00025297001	A0A068UHZ5	Putative Patatin group A-3	GO:0016787;GO:0016042	AT2G26560	-5.63589269919749	3.30021387633308e-11
Cc07_g10860	GSCOC_T00037064001	A0A068U2P9	Pathogenesis-related protein 5	GO:0016021	AT1G75040	-5.63111872979387	5.39014055783296e-27
Cc02_g09850	GSCOC_T00029601001	A0A068TV18	Putative Major facilitator superfamily protein	GO:0016021;GO:0022857		-5.61773611405973	1.30274784899214e-17
Cc00_g16220	GSCOC_T00013154001	A0A068VHN6	unknown protein; FUNCTIONS IN	GO:0016021		-5.61484408886583	4.25180948486411e-23
Cc10_g14500	GSCOC_T00033583001	A0A068USF9	Hypothetical protein	GO:0016021		-5.60651721901097	0.000119069131007974
Cc08_g14680	GSCOC_T00030194001	A0A068UMT7	Tubulin beta-1 chain	GO:0005737;GO:0005874;GO:0005525;GO:0003924;GO:0005200;GO:0007017	AT5G12250	-5.60360529014194	5.53048961924622e-28
Cc00_g25900	GSCOC_T00006242001	A0A068VNH1	EXORDIUM like 2		AT5G64260	-5.58570151309009	1.91309138415049e-11
Cc08_g08800	GSCOC_T00017212001	A0A068V6E1	Putative BURP domain-containing protein 5		AT5G25610	-5.57970165828198	1.51864747519866e-18
Cc00_g00570	GSCOC_T00036149001	A0A068UW82	Putative Probable receptor-like protein kinase At1g67000	GO:0005524;GO:0004674	AT5G38280	-5.57402845835221	1.72446090458465e-11
Cc02_g27820	GSCOC_T00025132001	A0A068UHM2	WIP domain protein 5			-5.56095921402054	0.00234499884666046
Cc00_g16330	GSCOC_T00010875001	A0A068VHZ1	Putative Probable receptor-like protein kinase At5g39030	GO:0005524;GO:0004674		-5.55761762109965	0.000968258629487356
Cc00_g13110	GSCOC_T00005396001	A0A068VJK1	Putative Probably inactive leucine-rich repeat receptor-like protein kinase At2g25790			-5.55707172255664	0.000699940192908955
Cc10_g13610	GSCOC_T00035262001	A0A068UTR8	Putative Probable calcium-binding protein CML44	GO:0005509	AT1G21550	-5.55673414968388	3.63450245400762e-28
Cc00_g06630	GSCOC_T00007484001	A0A068VGS6	Putative Bifunctional dihydroflavonol 4-reductase/flavanone 4-reductase	GO:0003824	AT4G35420	-5.55376553216449	1.87871548301619e-11
Cc08_g02120	GSCOC_T00037673001	A0A068UX07	Type I inositol 1,4,5-trisphosphate 5-phosphatase 2	GO:0016787;GO:0046856	AT4G18010	-5.54683062876984	8.83899329142574e-18
Cc08_g12940	GSCOC_T00030408001	A0A068UN00	Monocopper oxidase-like protein SKU5	GO:0046658;GO:0048046;GO:0009505;GO:0009506;GO:0005774;GO:0005507;GO:0016491;GO:0009932	AT4G12420	-5.53772708965349	6.76840371527226e-09
Cc01_g08480	GSCOC_T00006217001	A0A068VJI6	Putative Aspartic proteinase nepenthesin-1	GO:0004190		-5.53772414024463	4.58038935193793e-10
Cc10_g02940	GSCOC_T00024808001	A0A068UH38	Putative uncharacterized protein			-5.53771806431013	0.00226498777066737
Cc01_g11410	GSCOC_T00024270001	A0A068UF77	Auxin response factor 4	GO:0005634;GO:0003677;GO:0009734;GO:0006355	AT5G60450	-5.53389059501328	1.85068095061422e-24
Cc00_g06800	GSCOC_T00007409001	A0A068VDI8	Fasciclin-like arabinogalactan protein 2	GO:0005886;GO:0005774	AT4G12730	-5.53081553294486	5.42429591191305e-13
Cc02_g39700	GSCOC_T00027679001	A0A068UK98	Calcium-transporting ATPase, endoplasmic reticulum-type	GO:0016021;GO:0005524	AT4G00900	-5.52469747667898	1.21557381217758e-09
Cc06_g11950	GSCOC_T00041595001	A0A068U671	photosystem II subunit X	GO:0009535;GO:0016021;GO:0009523;GO:0019904;GO:0015979		-5.51849085079425	2.91083823036544e-13
Cc02_g20260	GSCOC_T00014634001	A0A068TMT9	Probable xyloglucan endotransglucosylase/hydrolase protein 10	GO:0048046;GO:0005618;GO:0004553;GO:0016762;GO:0042546;GO:0071555;GO:0010411	AT2G14620	-5.51689043725599	0.00442373999610706
Cc02_g16700	GSCOC_T00014164001	A0A068TL59	Auxin-induced protein 15A	GO:0009733	AT5G18030	-5.51323791613201	2.13801827932117e-06
Cc00_g22200	GSCOC_T00012731001	A0A068VJ52	Hypothetical protein			-5.50838263916797	0.000119729904969388
Cc03_g14910	GSCOC_T00026740001	A0A068UIK9	Putative UPF0481 protein At3g02645	GO:0016021		-5.50494584038148	2.119818249453e-22
Cc02_g10710	GSCOC_T00029500001	A0A068TU94	Putative Protein of unknown function (DUF1635)			-5.50330552751887	6.16862872976376e-06
Cc04_g03110	GSCOC_T00022000001	A0A068TNW5	Putative unknown protein; FUNCTIONS IN	GO:0016021		-5.49639928776334	1.80920775830556e-17
Cc03_g14200	GSCOC_T00031814001	A0A068URE4	Plant basic secretory protein (BSP) family protein			-5.4718818277412	2.25694575396776e-09
Cc04_g08320	GSCOC_T00022688001	A0A068TQL0	Putative Subtilisin-like protease	GO:0004252	AT4G30020	-5.46937345010052	2.02443583786039e-14
Cc01_g05840	GSCOC_T00027410001	A0A068UJ23	Bidirectional sugar transporter SWEET3b	GO:0016021;GO:0008643	AT5G53190	-5.46496420581612	1.45605682945373e-09
Cc08_g09400	GSCOC_T00017295001	A0A068V6R5	Aquaporin TIP4-1	GO:0016021;GO:0015267	AT2G25810	-5.46243844685436	4.91930094051141e-15
Cc09_g03130	GSCOC_T00017586001	A0A068U6V0	GDSL esterase/lipase At5g33370	GO:0016788;GO:0042538;GO:0010226;GO:0009751	AT5G33370	-5.45946009980664	4.80342847009929e-08
Cc09_g04660	GSCOC_T00017398001	A0A068U729	Putative DNA-3-methyladenine glycosylase 1	GO:0008725;GO:0006284		-5.45269135391694	2.82070937843719e-25
Cc02_g14930	GSCOC_T00013919001	A0A068TLJ0	Endoribonuclease Dicer homolog 2	GO:0016021;GO:0004525;GO:0031047;GO:0006396		-5.44232505446113	0.000251435652843459
Cc00_g33160	GSCOC_T00010406001	A0A068VMS1	Putative Probable LRR receptor-like serine/threonine-protein kinase At4g08850			-5.43284658331223	0.00101304613652772
Cc10_g04610	GSCOC_T00034915001	A0A068TYE9	Putative Subtilisin-like protease	GO:0004252	AT5G67090	-5.43097282951424	8.51313483939874e-06
Cc11_g05190	GSCOC_T00020460001	A0A068UAA3	Glutamate decarboxylase	GO:0004351;GO:0030170;GO:0006536		-5.42471688513424	0.00200857389831108
Cc05_g10830	GSCOC_T00021393001	A0A068UC13	Probable leucine-rich repeat receptor-like serine/threonine-protein kinase At3g14840	GO:0016021;GO:0005524;GO:0004672	AT3G14840	-5.41627117573118	7.03052504304677e-05
Cc09_g03590	GSCOC_T00017527001	A0A068U7U5	Putative ROP-interactive CRIB motif-containing protein 4		AT5G16490	-5.40910480402299	1.27220402301104e-10
Cc03_g09580	GSCOC_T00030941001	A0A068URP4	Putative Probably inactive leucine-rich repeat receptor-like protein kinase At5g48380	GO:0016021;GO:0005524;GO:0004672	AT4G32710	-5.39097849522391	4.26976214450717e-08
Cc03_g09320	GSCOC_T00042684001	A0A068V2U1	Probable receptor protein kinase TMK1	GO:0016021;GO:0005524;GO:0004674	AT3G23750	-5.38900580957518	7.15122820327333e-05
Cc02_g12760	GSCOC_T00029241001	A0A068TTM1	Metal-nicotianamine transporter YSL1	GO:0016021;GO:0055085	AT4G24120	-5.38580364406155	8.85953818925113e-11
Cc07_g09660	GSCOC_T00037213001	A0A068U318	Putative Transcription factor bHLH64	GO:0046983;GO:0006355	AT4G34530	-5.3783607326599	5.32902812611795e-13
Cc08_g02380	GSCOC_T00037709001	A0A068UXF3	Ent-kaurenoic acid oxidase 2	GO:0016021;GO:0020037;GO:0005506;GO:0004497;GO:0016705	AT2G32440	-5.37481289007704	2.5380180206942e-15
Cc10_g04190	GSCOC_T00034966001	A0A068TZ68	Chlorophyll a-b binding protein P4, chloroplastic	GO:0009535;GO:0016021;GO:0009522;GO:0009523;GO:0016168;GO:0009765;GO:0018298	AT1G45474	-5.37417502726023	4.42208179239575e-17
Cc03_g15130	GSCOC_T00026773001	A0A068UHW4	Putative UDP-glycosyltransferase 74E2	GO:0008194	AT1G05680	-5.36537436050536	1.61627247086978e-05
Cc02_g03820	GSCOC_T00020280001	A0A068UCD1	Putative Cell cycle regulated microtubule associated protein	GO:0005874;GO:0005819;GO:0032147;GO:0060236		-5.35635691131399	4.09486980785134e-06
Cc00_g31960	GSCOC_T00012136001	A0A068VME0	COBRA-like protein 4	GO:0031225;GO:0010215	AT5G15630	-5.35216598446628	2.05553421384661e-05
Cc06_g17600	GSCOC_T00040342001	A0A068V000	Putative unknown protein; FUNCTIONS IN	GO:0016021		-5.34995623779344	3.41415758272097e-14
Cc03_g07330	GSCOC_T00026580001	A0A068TTW0	Salicylate O-methyltransferase	GO:0008168		-5.34906877087628	0.0033597466101974
Cc04_g07590	GSCOC_T00022589001	A0A068TT05	Hypothetical protein	GO:0016021	AT3G25690	-5.34855767716611	9.19531311769063e-11
Cc01_g21630	GSCOC_T00004957001	A0A068V8D1	Long chain acyl-CoA synthetase 1	GO:0003824	AT2G47240	-5.34787512227147	2.06188327892031e-12
Cc02_g14990	GSCOC_T00013928001	A0A068TKJ0	Non-specific lipid-transfer protein	GO:0008289;GO:0006869	AT5G59320	-5.34767296609022	3.09125522414733e-14
Cc11_g15510	GSCOC_T00038065001	A0A068UXH6	Protein of Unknown Function (DUF239)			-5.34726970097526	0.00127772875385504
Cc04_g12070	GSCOC_T00005249001	A0A068V8T6	Putative unknown protein; FUNCTIONS IN			-5.33792812966083	0.00453583958395311
Cc10_g02450	GSCOC_T00024747001	A0A068UFY0	Putative Transmembrane protein 136	GO:0016021		-5.33031746228762	0.000902150150721199
Cc08_g01750	GSCOC_T00038339001	A0A068V0J5	Cytochrome c oxidase subunit 6b-3	GO:0005739	AT4G28060	-5.32380563120369	4.80279992026446e-08
Cc00_g31130	GSCOC_T00004245001	A0A068VME9	8-hydroxyquercetin 8-O-methyltransferase	GO:0008171;GO:0046983;GO:0032259		-5.32161589980783	0.004289940097238
Cc10_g12870	GSCOC_T00035375001	A0A068UUS3	Serine carboxypeptidase-like 42	GO:0004185	AT5G42240	-5.31936736371959	3.05554216851069e-07
Cc08_g08820	GSCOC_T00017214001	A0A068V6I5	Putative BURP domain-containing protein 5		AT5G25610	-5.31325469803331	2.119818249453e-22
Cc08_g08390	GSCOC_T00007225001	A0A068VC38	Auxin-induced protein 15A	GO:0009733	AT5G18060	-5.30989446857534	3.72521843603149e-06
Cc00_g09690	GSCOC_T00003085001	A0A068VFU5	Hypothetical protein			-5.29709372420328	0.00362047270570224
Cc00_g05630	GSCOC_T00011947001	A0A068VDB8	Putative uncharacterized protein			-5.29545676189334	0.00870129529421593
Cc05_g07760	GSCOC_T00016777001	A0A068V518	Receptor-like protein kinase HSL1	GO:0016021;GO:0005524;GO:0004674	AT1G28440	-5.28465035245832	0.000141052635023339
Cc11_g14460	GSCOC_T00032056001	A0A068TXZ8	NHL domain-containing protein	GO:0016021		-5.28371797661109	3.96761246111299e-06
Cc07_g13530	GSCOC_T00036725001	A0A068TZD5	Protein RSI-1		AT1G74670	-5.28083462927546	0.000157593932865228
Cc05_g12720	GSCOC_T00021155001	A0A068UC45	Chlorophyll a-b binding protein 13, chloroplastic	GO:0016021;GO:0009522;GO:0009523;GO:0009517;GO:0016168;GO:0019904;GO:0009769;GO:0018298;GO:0010119;GO:0009737;GO:0009635;GO:0009644	AT5G54270	-5.27948450584122	2.99756480858269e-22
Cc02_g27240	GSCOC_T00025049001	A0A068UHP5	Beta-glucosidase 10	GO:0004553;GO:0005975	AT5G44640	-5.2764868276358	3.51864080952909e-07
Cc03_g03660	GSCOC_T00026061001	A0A068TSM4	Primary amine oxidase	GO:0005507;GO:0008131;GO:0048038;GO:0009308	AT4G14940	-5.2710544322866	8.94333252991381e-23
Cc00_g24030	GSCOC_T00013492001	A0A068VKD0	Putative Cytosolic sulfotransferase 15	GO:0008146	AT5G07010	-5.25987371358776	2.1430643356835e-06
Cc01_g06140	GSCOC_T00027452001	A0A068UJ61	Putative LRR receptor-like serine/threonine-protein kinase GSO1		AT5G16000	-5.25719221050552	2.58729999141073e-05
Cc07_g08840	GSCOC_T00040274001	A0A068U3P4	3-ketoacyl-CoA synthase 6	GO:0016021;GO:0016747;GO:0006633	AT1G68530	-5.25615862076836	3.70039694439218e-18
Cc02_g06950	GSCOC_T00039249001	A0A068V0M5	Laccase-4	GO:0048046;GO:0005507;GO:0052716;GO:0046274	AT2G38080	-5.25485396498035	0.000788409248892769
Cc01_g17460	GSCOC_T00016322001	A0A068U5K1	GDSL esterase/lipase At4g28780	GO:0016788	AT4G28780	-5.24589925458015	4.64026968368446e-07
Cc01_g05180	GSCOC_T00011472001	A0A068VA14	Omega-6 fatty acid desaturase, endoplasmic reticulum isozyme 2	GO:0016021;GO:0016717;GO:0006629	AT3G12120	-5.23907266484257	2.26089734824868e-20
Cc06_g12230	GSCOC_T00041563001	A0A068U3E7	Subtilisin-like protease	GO:0005618;GO:0005794;GO:0009506;GO:0004252	AT2G05920	-5.2279045677607	3.82611114101327e-13
Cc08_g04240	GSCOC_T00034240001	A0A068UTZ2	Putative Disease resistance protein RGA2			-5.21511496467801	0.000114271610302285
Cc00_g22690	GSCOC_T00011338001	A0A068VJL8	BURP domain-containing protein 3		AT5G25610	-5.20817947481112	0.00199282246776131
Cc06_g09860	GSCOC_T00041858001	A0A068U4U2	Rho guanine nucleotide exchange factor 8	GO:0005089	AT3G24620	-5.2073417865764	6.11721276323032e-05
Cc11_g10580	GSCOC_T00032559001	A0A068TWE1	Probable galacturonosyltransferase-like 3	GO:0016757	AT1G13250	-5.20045785392525	7.42533007505064e-06
Cc04_g11300	GSCOC_T00037301001	A0A068UWR1	Putative Cytochrome P450 71A26	GO:0020037;GO:0005506;GO:0004497;GO:0016705	AT3G48270	-5.19862498495313	7.65366936826713e-05
Cc03_g07230	GSCOC_T00026566001	A0A068TTV1	Probable pectate lyase 15	GO:0016021;GO:0046872;GO:0030570;GO:0045490	AT4G13710	-5.18651374399382	1.11140783516449e-05
Cc00_g25690	GSCOC_T00004622001	A0A068VKW0	Putative uncharacterized protein	GO:0043531		-5.17479996357102	1.06128550942373e-06
Cc11_g08570	GSCOC_T00032854001	A0A068TXL2	Hypothetical protein	GO:0042025;GO:0000786;GO:0003677;GO:0006334		-5.17198293472538	0.00996311812143009
Cc09_g03350	GSCOC_T00017560001	A0A068U9G8	Dynamin-related protein 4C	GO:0005525;GO:0003924	AT1G60500	-5.16570019385274	6.12649758244682e-05
Cc09_g07150	GSCOC_T00036308001	A0A068UVQ4	Putative Subtilisin-like protease	GO:0004252		-5.16334909127015	0.000476018868185954
Cc10_g04510	GSCOC_T00034925001	A0A068TYF7	alpha/beta-Hydrolases superfamily protein	GO:0006629	AT3G14360	-5.16109641566599	1.77853390486856e-09
Cc02_g27260	GSCOC_T00025053001	A0A068UH06	Beta-glucosidase 12	GO:0004553;GO:0005975	AT5G44640	-5.15894625727746	2.42912102634504e-07
Cc01_g19590	GSCOC_T00016040001	A0A068U5P7	Putative Antifungal protein ginkbilobin-2		AT4G23140	-5.15632786896289	6.4676161716645e-05
Cc07_g16100	GSCOC_T00037608001	A0A068UWJ5	Putative Probable carboxylesterase 6	GO:0016787		-5.1547636398441	4.05730881287562e-15
Cc05_g15410	GSCOC_T00038696001	A0A068UYR9	kinesin-like protein 1	GO:0005524;GO:0008017;GO:0003777;GO:0007018	AT3G44730	-5.15280726774305	2.70551627763493e-05
Cc02_g03700	GSCOC_T00020263001	A0A068U9Y2	Subtilisin-like protease	GO:0004252	AT5G51750	-5.14213238751911	0.00105785485559014
Cc06_g21770	GSCOC_T00015575001	A0A068V6U7	Putative uncharacterized protein			-5.142032984261	5.88257097570498e-09
Cc02_g13210	GSCOC_T00029186001	A0A068TTH0	Hypothetical protein			-5.13950705339156	0.000279265813727163
Cc00_g01360	GSCOC_T00010937001	A0A068V9R6	Probable indole-3-acetic acid-amido synthetase GH3.1		AT2G14960	-5.12212289899658	4.57655162271333e-18
Cc10_g04830	GSCOC_T00034888001	A0A068U109	Putative uncharacterized protein			-5.10397400941782	1.14824801610768e-28
Cc02_g33720	GSCOC_T00015419001	A0A068V4U5	Putative Protein kinase superfamily protein	GO:0016021;GO:0005524;GO:0004674	AT5G02800	-5.10099270897561	3.17600411717651e-05
Cc04_g03220	GSCOC_T00022015001	A0A068TP57	ATP binding microtubule motor family protein	GO:0005874;GO:0005634;GO:0005886;GO:0005524;GO:0008017;GO:0003777;GO:0007018;GO:1903338	AT3G16060	-5.10092745560273	3.80058360022982e-16
Cc00_g05030	GSCOC_T00000057001	A0A068VCD8	Putative Probably inactive leucine-rich repeat receptor-like protein kinase At2g25790	GO:0048046	AT1G58170	-5.09468156312912	0.000366788805240008
Cc04_g04550	GSCOC_T00022184001	A0A068TQJ4	alpha/beta-Hydrolases superfamily protein	GO:0003824		-5.09238282918245	1.74435713869414e-17
Cc05_g14120	GSCOC_T00038859001	A0A068UZY1	Putative uncharacterized protein	GO:0016021		-5.08689456552628	8.0704011121895e-11
Cc08_g12770	GSCOC_T00030433001	A0A068UNN7	14 kDa proline-rich protein DC2.15		AT4G12480	-5.08377679514152	8.37093443010286e-17
Cc03_g08140	GSCOC_T00033206001	A0A068UU60	Putative Reticulon-like protein B13	GO:0005789;GO:0016021		-5.08203245181342	1.10251852399182e-06
Cc09_g08490	GSCOC_T00020817001	A0A068UAY3	Photosystem I reaction center subunit psaK, chloroplastic	GO:0009522;GO:0015979	AT1G30380	-5.07720585605704	3.56198424002762e-17
Cc01_g15220	GSCOC_T00016590001	A0A068U795	Putative ovate family protein 3	GO:0005634;GO:0003677;GO:0045892	AT5G58360	-5.07426707910197	0.0014357015524807
Cc11_g13310	GSCOC_T00032199001	A0A068TY73	Homeobox-leucine zipper protein ATHB-13	GO:0005634;GO:0043565;GO:0006355	AT1G69780	-5.06867197621134	7.68762140783215e-13
Cc11_g10870	GSCOC_T00032519001	A0A068TWW4	Hypothetical protein	GO:0016021		-5.05877357140559	0.00226515800801972
Cc07_g17590	GSCOC_T00018878001	A0A068UAX2	Putative G-type lectin S-receptor-like serine/threonine-protein kinase RLK1	GO:0016021;GO:0005524;GO:0004674	AT1G34300	-5.05773446692408	4.58602297484514e-07
Cc11_g09700	GSCOC_T00032686001	A0A068TXN5	Non-specific lipid-transfer protein 2	GO:0006869		-5.0575213703982	3.87319377493464e-14
Cc05_g06770	GSCOC_T00042189001	A0A068V1V5	Tabersonine 16-hydroxylase (Fragment)	GO:0020037;GO:0005506;GO:0004497;GO:0016705	AT3G26210	-5.05609972271005	4.47222346230724e-30
Cc00_g03770	GSCOC_T00002032001	A0A068VBK7	AAA-ATPase 1	GO:0016021;GO:0005524	AT5G40010	-5.05009768743832	4.11065019134513e-08
Cc05_g11950	GSCOC_T00021251001	A0A068UCJ7	VQ motif-containing protein		AT1G28280	-5.03180460467287	4.11052038500569e-08
Cc05_g00960	GSCOC_T00009655001	A0A068VEJ9	Putative disease resistance protein RGA3	GO:0043531		-5.03152696475944	0.000671637485536988
Cc11_g08370	GSCOC_T00032885001	A0A068TXM4	Putative MLP-like protein 28	GO:0006952		-5.02141072894926	2.9817240348485e-14
Cc05_g07890	GSCOC_T00016793001	A0A068V7K8	8-hydroxyquercetin 8-O-methyltransferase	GO:0008171;GO:0046983;GO:0032259		-5.00751475136987	1.045056007087e-14
Cc10_g07380	GSCOC_T00034531001	A0A068U093	Putative unknown protein; FUNCTIONS IN			-4.98560871253714	7.15007829653307e-15
Cc03_g08650	GSCOC_T00033294001	A0A068USL2	Putative Probable LRR receptor-like serine/threonine-protein kinase At4g08850	GO:0016021;GO:0005524;GO:0004672	AT4G08850	-4.97126464531833	2.20547382014817e-05
Cc02_g36510	GSCOC_T00003915001	A0A068VB37	Fasciclin-like arabinogalactan protein 8	GO:0016021	AT2G45470	-4.95967638157441	9.77655310320947e-07
Cc11_g12830	GSCOC_T00032263001	A0A068TVS4	Expansin-A1	GO:0005618;GO:0005576;GO:0016021;GO:0009664	AT2G03090	-4.95683126535303	1.47852804747745e-15
Cc00_g23340	GSCOC_T00012065001	A0A068VJU3	Putative O-acyltransferase (WSD1-like) family protein	GO:0004144;GO:0045017		-4.95585174852831	0.00317329683267075
Cc07_g06980	GSCOC_T00040030001	A0A068U4Q8	Putative Glucan endo-1,3-beta-glucosidase 1	GO:0004553;GO:0005975		-4.95505681815935	0.00436231377958347
Cc01_g05480	GSCOC_T00027347001	A0A068UIS4	Putative Probable leucine-rich repeat receptor-like protein kinase At1g35710		AT1G66830	-4.95251219743958	0.000405517573121759
Cc05_g15350	GSCOC_T00038702001	A0A068UZ75	Probable LRR receptor-like serine/threonine-protein kinase At4g26540	GO:0016021;GO:0005524;GO:0004674	AT4G26540	-4.95161489461114	7.18109792052877e-10
Cc00_g16370	GSCOC_T00011224001	A0A068VHE7	Glutamate receptor 2.7	GO:0016021;GO:0015276	AT2G29120	-4.95021073574169	3.22963782777718e-05
Cc07_g06020	GSCOC_T00039894001	A0A068U2E5	Putative Remorin family protein	GO:0005886		-4.94587075927802	2.31688747386301e-11
Cc07_g16650	GSCOC_T00037536001	A0A068UWE0	Protein of unknown function (DUF3511)			-4.94347616253904	9.34259372058298e-14
Cc01_g17230	GSCOC_T00016350001	A0A068U8B5	Tetratricopeptide repeat (TPR)-like superfamily protein	GO:0010438;GO:0010439;GO:0006792	AT5G48850	-4.92530356331348	1.82070812026986e-06
Cc11_g02020	GSCOC_T00033038001	A0A068UTU3	Putative Probable disease resistance protein RDL6	GO:0043531		-4.92145939942655	0.00560812161483241
Cc10_g15290	GSCOC_T00033704001	A0A068USC5	Tryptophan aminotransferase-related protein 4	GO:0016021;GO:0016846	AT1G34060	-4.91020187106886	2.26791469047538e-06
Cc00_g33290	GSCOC_T00010540001	A0A068VN14	Putative Bifunctional dihydroflavonol 4-reductase/flavanone 4-reductase		AT1G15950	-4.90267096630238	1.34515971639048e-08
Cc04_g16710	GSCOC_T00035779001	A0A068UVN1	Hypothetical protein			-4.89515811601686	7.2737220102069e-05
Cc00_g21880	GSCOC_T00013638001	A0A068VJN8	Putative UDP-glycosyltransferase 83A1	GO:0008194	AT3G02100	-4.89200775935645	1.63531232656344e-08
Cc00_g30480	GSCOC_T00003185001	A0A068VM88	Putative Disease resistance protein RGA2	GO:0043531	AT5G47280	-4.87934156573333	3.40897933658229e-06
Cc06_g12590	GSCOC_T00041519001	A0A068U4G1	Putative 21 kDa protein	GO:0004857	AT5G20740	-4.87291544628074	2.14545735966763e-05
Cc00_g28800	GSCOC_T00011418001	A0A068VLH5	Putative Isoflavone 7-O-methyltransferase	GO:0008171;GO:0046983;GO:0032259		-4.87254044979011	1.94149855887421e-17
Cc11_g04680	GSCOC_T00004833001	A0A068V8L4	Putative Cytosolic sulfotransferase 17	GO:0008146	AT1G18590	-4.87082783149927	0.000225533299791804
Cc04_g07160	GSCOC_T00022522001	A0A068TQ36	Putative Zinc finger protein CONSTANS-LIKE 16	GO:0005634;GO:0008270	AT1G25440	-4.86762623610503	7.36240011855284e-29
Cc02_g06220	GSCOC_T00039148001	A0A068UZZ2	Putative Omega-hydroxypalmitate O-feruloyl transferase	GO:0016747		-4.86759959119311	0.00467298243087382
Cc00_g04360	GSCOC_T00005968001	A0A068VC78	Putative cytochrome BC1 synthesis	GO:0005524	AT3G50930	-4.85301517329116	3.03041126981166e-06
Cc04_g09640	GSCOC_T00008123001	A0A068VIW8	Protein ASPARTIC PROTEASE IN GUARD CELL 1	GO:0004190;GO:0009737;GO:0009414	AT3G18490	-4.83996233156837	2.54864972724151e-21
Cc00_g13150	GSCOC_T00011730001	A0A068VGZ0	Putative uncharacterized protein	GO:0043531		-4.82950409509874	0.00915551535449984
Cc10_g07690	GSCOC_T00034491001	A0A068TY52	Putative uncharacterized protein	GO:0005634;GO:0003677;GO:0003700	AT4G37750	-4.82540114100027	7.07277437553144e-06
Cc02_g29340	GSCOC_T00018351001	A0A068V933	Putative amidase C869.01		AT4G34880	-4.81366852991925	2.58626975541199e-17
Cc00_g27080	GSCOC_T00004251001	A0A068VLA0	Hypothetical protein			-4.8106120128249	8.49938980196659e-11
Cc05_g11240	GSCOC_T00021340001	A0A068UBQ8	TPR repeat-containing thioredoxin TTL1		AT1G53300	-4.80913622033255	1.07330340781463e-11
Cc00_g09260	GSCOC_T00012312001	A0A068VF64	Putative NBS resistance protein	GO:0000166;GO:0006952	AT3G14460	-4.80491039126241	5.94304128213445e-08
Cc08_g08370	GSCOC_T00007228001	A0A068VCV7	Caffeic acid 3-O-methyltransferase	GO:0008171;GO:0046983;GO:0032259	AT5G54160	-4.8011054149948	8.73261332381083e-13
Cc11_g16640	GSCOC_T00038205001	A0A068V0B0	Remorin family protein	GO:0005634		-4.80009853812457	0.00140843906532017
Cc00_g24520	GSCOC_T00012254001	A0A068VKH7	Putative Cyclin-D3-2	GO:0042025		-4.79864015461217	0.00507525885900873
Cc06_g01660	GSCOC_T00023395001	A0A068UD72	Putative UPF0503 protein At3g09070, chloroplastic		AT3G09070	-4.78472628843182	3.00109065868050e-11
Cc04_g08060	GSCOC_T00022654001	A0A068TQB6	Tropinone reductase homolog At1g07440		AT5G06060	-4.77850399200719	5.86769689881617e-13
Cc00_g03940	GSCOC_T00013715001	A0A068VC26	Hypothetical protein			-4.7772256650628	0.00013244696137069
Cc08_g13880	GSCOC_T00030292001	A0A068UN02	Protein HOTHEAD	GO:0050660;GO:0016614	AT1G72970	-4.77522381539447	3.18575905229927e-19
Cc09_g01560	GSCOC_T00017793001	A0A068U7X6	5'-adenylylsulfate reductase 3, chloroplastic	GO:0016671;GO:0019419	AT4G21990	-4.77353177497123	4.54665006621474e-13
Cc06_g23640	GSCOC_T00040543001	A0A068V317	Copper ion binding protein, putative	GO:0046872;GO:0030001		-4.77084616614952	0.00375627553583038
Cc01_g17250	GSCOC_T00016348001	A0A068U5T5	Putative uncharacterized protein			-4.76694676370214	3.14254677457706e-13
Cc01_g10950	GSCOC_T00024211001	A0A068UEU6	Cytokinin riboside 5'-monophosphate phosphoribohydrolase LOG1	GO:0016787;GO:0009691	AT2G28305	-4.75931710313684	1.21821348169007e-06
Cc04_g07700	GSCOC_T00022604001	A0A068TRB1	Protein of unknown function, DUF617	GO:0010274	AT2G41660	-4.73986246238539	7.93574977359594e-14
Cc02_g21280	GSCOC_T00014765001	A0A068TN86	ABC transporter G family member 11	GO:0016021;GO:0005524;GO:0016887	AT1G17840	-4.73914441777079	1.90157846741372e-19
Cc11_g08800	GSCOC_T00032824001	A0A068TXX2	unknown protein; BEST Arabidopsis thaliana protein match is		AT1G66480	-4.73817752358854	9.03412328062645e-06
Cc07_g07420	GSCOC_T00040091001	A0A068U2W8	Squalene monooxygenase	GO:0016021;GO:0050660;GO:0004506;GO:0016126	AT1G58440	-4.73792416305803	9.43407401445528e-16
Cc01_g08780	GSCOC_T00023914001	A0A068UGV8	photosystem I subunit O	GO:0009507;GO:0016021;GO:0009522;GO:0009767	AT1G08380	-4.73526718390604	1.72663592850652e-11
Cc02_g03720	GSCOC_T00020265001	A0A068UCC3	Alpha-L-fucosidase 1	GO:0004560;GO:0006004	AT2G28100	-4.72026337394584	2.91493632360094e-05
Cc07_g07060	GSCOC_T00040040001	A0A068U252	Putative BTB/POZ domain-containing protein At3g49900		AT5G13600	-4.71951881018117	0.000198836647439661
Cc11_g05720	GSCOC_T00020540001	A0A068UB94	65-kDa microtubule-associated protein 7	GO:0008017;GO:0000226	AT1G14690	-4.71829134839364	1.42546284641195e-10
Cc02_g16500	GSCOC_T00014143001	A0A068TL45	Hypothetical protein		AT4G38770	-4.71750457543501	4.10740497611317e-10
Cc00_g15440	GSCOC_T00001450001	A0A068VH11	Putative Probable LRR receptor-like serine/threonine-protein kinase At4g08850	GO:0016021;GO:0005524;GO:0004672	AT4G08850	-4.71580074966368	1.33271190016326e-05
Cc03_g09190	GSCOC_T00042703001	A0A068V5H0	Probable xyloglucan endotransglucosylase/hydrolase protein 16	GO:0048046;GO:0005618;GO:0004553;GO:0016762;GO:0071555;GO:0006073	AT3G23730	-4.7141722380234	3.55485623849987e-13
Cc00_g17860	GSCOC_T00008903001	A0A068VI29	Probable polygalacturonase	GO:0004650;GO:0005975		-4.71289840109995	1.58193878661863e-10
Cc06_g11940	GSCOC_T00041597001	A0A068U4N0	Putative Mechanosensitive ion channel protein 10	GO:0016021;GO:0055085	AT5G12080	-4.71036190842892	2.06107760720901e-05
Cc05_g02850	GSCOC_T00020872001	A0A068UDK5	Putative Glucan endo-1,3-beta-glucosidase 3	GO:0004553;GO:0005975	AT2G01630	-4.70709453312688	2.96667885411449e-21
Cc00_g10230	GSCOC_T00006743001	A0A068VF82	Putative Gibberellin 3-beta-dioxygenase 4	GO:0046872;GO:0016491	AT4G03070	-4.69978991240707	3.9307961681501e-09
Cc02_g19900	GSCOC_T00014569001	A0A068TM56	Pollen-specific protein SF3	GO:0046872	AT1G10200	-4.69856009525035	1.01597089425287e-09
Cc02_g29530	GSCOC_T00018389001	A0A068V7D0	Putative 21 kDa seed protein	GO:0004866	AT1G17860	-4.69364161407665	2.32560607025467e-29
Cc07_g13350	GSCOC_T00036754001	A0A068U0E6	Probable inactive receptor kinase At1g48480	GO:0016021;GO:0005524;GO:0004672	AT5G16590	-4.69204714930544	1.32153017851664e-09
Cc11_g10190	GSCOC_T00032610001	A0A068TWD9	3-ketoacyl-CoA synthase 6	GO:0016021;GO:0016747;GO:0006633	AT1G68530	-4.68826187257395	2.28109327710102e-12
Cc09_g00440	GSCOC_T00017950001	A0A068U8K6	Uncharacterized protein	GO:0046872;GO:0030001		-4.68619776212832	8.71604906757603e-20
Cc09_g05880	GSCOC_T00033398001	A0A068URX1	Kinase, putative	GO:0016021;GO:0005524;GO:0004672	AT1G19390	-4.68071323242166	0.000475987655939933
Cc02_g37540	GSCOC_T00027976001	A0A068UK02	( )-neomenthol dehydrogenase		AT2G24190	-4.68042962287982	8.00565375743316e-08
Cc03_g08610	GSCOC_T00033289001	A0A068URS3	Putative Probable LRR receptor-like serine/threonine-protein kinase At4g08850	GO:0016021;GO:0005524;GO:0004672	AT4G08850	-4.67828282266379	0.00234731642962003
Cc00_g12980	GSCOC_T00005422001	A0A068VG81	8-hydroxyquercetin 8-O-methyltransferase	GO:0008171;GO:0046983;GO:0032259		-4.67091055245989	4.315017932567e-10
Cc00_g17910	GSCOC_T00008097001	A0A068VL37	Gibberellin 2-beta-dioxygenase 8	GO:0005737;GO:0005634;GO:0045543;GO:0046872;GO:0010336;GO:0045487	AT4G21200	-4.66672162357237	9.54541941882247e-05
Cc08_g04410	GSCOC_T00034266001	A0A068UU58	Hypothetical protein			-4.66603075721025	8.53848614055083e-09
Cc04_g16480	GSCOC_T00035750001	A0A068UV65	Putative Probable calcium-binding protein CML47	GO:0005509	AT5G39670	-4.66158893958324	2.12214807464592e-06
Cc09_g09860	GSCOC_T00006973001	A0A068VFH0	Putative Mavicyanin	GO:0009055		-4.65861057565673	5.04912991838002e-06
Cc05_g00110	GSCOC_T00017031001	A0A068V5H8	Hypothetical protein			-4.65451758158303	4.39168625874365e-20
Cc05_g08260	GSCOC_T00016844001	A0A068V562	Putative LRR receptor-like serine/threonine-protein kinase GSO1			-4.64782654508873	1.5158008395388e-14
Cc06_g07020	GSCOC_T00031314001	A0A068UQL0	Probable carboxylesterase 15	GO:0016787	AT5G06570	-4.63224361653165	1.98529802929986e-06
Cc00_g15680	GSCOC_T00011279001	A0A068VHF5	Putative disease resistance protein RGA4	GO:0043531		-4.62615837055233	0.00100936902876439
Cc02_g23990	GSCOC_T00015105001	A0A068TN17	Putative Leucine-rich repeat receptor protein kinase EXS	GO:0016021;GO:0005524;GO:0004672		-4.62099145041864	0.00496072538102045
Cc00_g02000	GSCOC_T00000828001	A0A068VA84	Mitochondrial transcription termination factor family protein	GO:0003690;GO:0006355	AT2G03050	-4.61981471230229	2.78585307229476e-13
Cc10_g09760	GSCOC_T00031503001	A0A068UR52	Putative Probable peptide/nitrate transporter At1g22540	GO:0016021;GO:0022857	AT1G22540	-4.61669137524357	8.55374471328534e-11
Cc06_g13860	GSCOC_T00041337001	A0A068U3L2	Putative unknown protein; FUNCTIONS IN	GO:0016021		-4.61172036486273	9.62870657061016e-10
Cc07_g05170	GSCOC_T00039781001	A0A068U258	Probable galacturonosyltransferase-like 2	GO:0016757		-4.60667857033912	0.00423587289354916
Cc03_g04570	GSCOC_T00026182001	A0A068TUX6	3-ketoacyl-CoA synthase 17	GO:0016021;GO:0016747;GO:0006633	AT1G04220	-4.59814720982658	1.69525831689931e-17
Cc00_g16900	GSCOC_T00011320001	A0A068VKS2	Putative Probable LRR receptor-like serine/threonine-protein kinase At4g08850		AT1G71830	-4.59800634593935	4.07703042822629e-06
Cc03_g11460	GSCOC_T00019349001	A0A068V854	Putative agenet domain-containing protein			-4.59082125923824	0.00217026353907359
Cc10_g09170	GSCOC_T00034285001	A0A068TY49	Putative Cytochrome P450 82C4	GO:0020037;GO:0005506;GO:0004497;GO:0016705	AT4G31940	-4.5895804639532	3.30135953790438e-16
Cc09_g00150	GSCOC_T00017985001	A0A068UAA4	Hypothetical protein			-4.58938603716521	1.33925468015964e-06
Cc03_g08200	GSCOC_T00033216001	A0A068USD4	Hypothetical protein			-4.5879835737046	0.00245361480430024
Cc01_g03970	GSCOC_T00040873001	A0A068V0V9	Isoflavone reductase homolog P3			-4.5871453817927	0.00305193104265986
Cc11_g02980	GSCOC_T00025493001	A0A068UHB1	Interactor of constitutive active ROPs 2, chloroplastic		AT2G37080	-4.56633930953754	4.32355012559647e-09
Cc06_g15060	GSCOC_T00030885001	A0A068UP96	Probable LRR receptor-like serine/threonine-protein kinase At2g24230	GO:0016021;GO:0005524;GO:0004672	AT2G24230	-4.56390271151536	0.00163451153978173
Cc06_g21530	GSCOC_T00008024001	A0A068VA13	Core-2/I-branching beta-1,6-N-acetylglucosaminyltransferase family protein	GO:0016020;GO:0009567;GO:0048868	AT5G39990	-4.55751800137198	4.10978707184721e-05
Cc03_g14720	GSCOC_T00026705001	A0A068UHI4	Putative Protein of unknown function (DUF594)	GO:0016021		-4.55344782909139	0.000964228634742476
Cc08_g02370	GSCOC_T00037708001	A0A068UX32	Putative Deacetylvindoline O-acetyltransferase	GO:0016747		-4.55314234570985	1.27755867668249e-13
Cc03_g03140	GSCOC_T00025993001	A0A068TRQ1	Hypothetical protein	GO:0046872;GO:0030001	AT3G06130	-4.54999804980998	7.0330093082978e-09
Cc00_g18270	GSCOC_T00012290001	A0A068VIL8	Putative Receptor-like protein 12	GO:0016021	AT1G71830	-4.54531144540245	0.000409075011064307
Cc00_g18440	GSCOC_T00011147001	A0A068VIA2	G-type lectin S-receptor-like serine/threonine-protein kinase At4g03230	GO:0016021;GO:0005524;GO:0004674;GO:0048544	AT4G21390	-4.54501248369223	3.82083286301166e-13
Cc04_g06040	GSCOC_T00022383001	A0A068TSJ5	Probable inactive receptor kinase At1g48480	GO:0016021;GO:0005524;GO:0004672	AT1G48480	-4.54203222185677	1.87908910310702e-09
Cc08_g15710	GSCOC_T00035511001	A0A068UUM7	Arabinogalactan peptide 20	GO:0016021		-4.5379546564444	0.000439611784551179
Cc09_g06490	GSCOC_T00005100001	A0A068VAI8	Delta(24)-sterol reductase	GO:0016021;GO:0071949;GO:0016491	AT3G19820	-4.53524243800372	1.82473621097746e-09
Cc11_g14930	GSCOC_T00001041001	A0A068VH36	Probable peptide/nitrate transporter At5g13400	GO:0016021;GO:0022857;GO:0006857	AT5G13400	-4.53481197972852	2.23195540364198e-19
Cc03_g13110	GSCOC_T00030601001	A0A068UNL3	Tetrapyrrole-binding protein, chloroplastic		AT3G59400	-4.53437168442801	1.2570189485787e-15
Cc07_g06320	GSCOC_T00039933001	A0A068U2H8	Hypothetical protein	GO:0016021	AT4G06744	-4.52919561493989	1.78295832085143e-14
Cc11_g09790	GSCOC_T00032670001	A0A068TWI3	Putative Protein kinase superfamily protein	GO:0016021;GO:0005524;GO:0004672	AT5G38280	-4.52892828505863	2.23386666889931e-13
Cc01_g14490	GSCOC_T00028448001	A0A068ULS7	Putative FUNCTIONS IN	GO:0009941	AT3G25690	-4.52108929192689	0.000176539681032669
Cc04_g16450	GSCOC_T00035743001	A0A068UXE0	Putative Cytosolic sulfotransferase 5	GO:0008146	AT3G45070	-4.51891463062738	4.01078964163587e-11
Cc00_g16430	GSCOC_T00005624001	A0A068VHQ2	8-hydroxyquercetin 8-O-methyltransferase	GO:0008171		-4.5097258948172	0.000282944247633545
Cc00_g00500	GSCOC_T00036137001	A0A068UW47	Putative Protein kinase superfamily protein	GO:0016021;GO:0005524;GO:0004672	AT5G38280	-4.5038204732264	1.59334816344957e-06
Cc01_g00050	GSCOC_T00012435001	A0A068VFX6	arabinogalactan protein 14	GO:0016021		-4.50377003876905	2.79685451643053e-11
Cc00_g18460	GSCOC_T00011149001	A0A068VL89	S-locus lectin protein kinase family protein	GO:0016021;GO:0005524;GO:0030247;GO:0004674	AT4G21390	-4.4976463591649	2.11985222442863e-11
Cc06_g03580	GSCOC_T00023643001	A0A068UEP1	alpha/beta-Hydrolases superfamily protein			-4.48967535157055	1.22469553374519e-05
Cc03_g15230	GSCOC_T00026792001	A0A068UHX6	Probable leucine-rich repeat receptor-like protein kinase At5g49770	GO:0016021;GO:0005524;GO:0004674	AT5G49770	-4.48423350919874	2.8076102018375e-06
Cc09_g09030	GSCOC_T00023116001	A0A068UFC9	Chlorophyll a-b binding protein 21, chloroplastic	GO:0009535;GO:0016021;GO:0009522;GO:0009523;GO:0016168;GO:0009765;GO:0018298	AT1G29930	-4.48371874146877	6.74493039160083e-10
Cc01_g12250	GSCOC_T00028155001	A0A068UMZ3	Putative Protein of unknown function (DUF1635)	GO:0016021	AT3G16720	-4.48151935381206	9.18700823619828e-19
Cc08_g14170	GSCOC_T00030258001	A0A068UNC1	Putative BON association protein 2			-4.48048087075737	3.86941302407866e-06
Cc02_g24840	GSCOC_T00028834001	A0A068UMH9	myb-like HTH transcriptional regulator family protein	GO:0048555;GO:0003700;GO:0043565;GO:0044839;GO:0055047;GO:0048235;GO:0045893		-4.48041764496937	0.00046170018438835
Cc04_g02690	GSCOC_T00021947001	A0A068TRJ5	Putative uncharacterized protein			-4.47935949092936	1.17540448582962e-10
Cc08_g16380	GSCOC_T00035596001	A0A068UX71	Putative Protein ABIL3		AT5G24310	-4.45708897425752	2.65117952608802e-13
Cc00_g11560	GSCOC_T00003165001	A0A068VGM3	Putative Disease resistance protein RGA2	GO:0043531;GO:0006952		-4.45315360581445	1.48278726503708e-10
Cc00_g27450	GSCOC_T00000948001	A0A068VLD5	Putative Probable LRR receptor-like serine/threonine-protein kinase At4g08850			-4.45143381984242	0.00979686261129385
Cc11_g08330	GSCOC_T00032889001	A0A068TX42	phosphoglucomutase, putative / glucose phosphomutase, putative	GO:0016868;GO:0005975		-4.4514282798539	4.90079734140148e-09
Cc02_g29030	GSCOC_T00011530001	A0A068VF11	Putative Bifunctional dihydroflavonol 4-reductase/flavanone 4-reductase	GO:0003824	AT1G15950	-4.43988414741093	9.92677479159883e-14
Cc02_g29000	GSCOC_T00011527001	A0A068VI04	Protein of unknown function (DUF288)	GO:0016021	AT2G41770	-4.43967435988737	7.07678998038881e-13
Cc09_g03470	GSCOC_T00017545001	A0A068U6X0	Putative auxin efflux carrier component 8	GO:0016021;GO:0009734;GO:0055085	AT5G16530	-4.43781206352722	2.33315360203212e-07
Cc10_g13470	GSCOC_T00035288001	A0A068UUK9	Putative Subtilisin-like protease SDD1	GO:0004252	AT1G04110	-4.43705673869225	3.8014051164789e-08
Cc04_g02390	GSCOC_T00021910001	A0A068TRG2	GDSL esterase/lipase APG	GO:0016788	AT3G16370	-4.4362538190613	6.36484110620241e-10
Cc04_g03720	GSCOC_T00022069001	A0A068TPB0	Putative Gibberellin 20 oxidase 3	GO:0046872;GO:0016491	AT4G03070	-4.43335343436475	8.73275767914443e-12
Cc06_g08340	GSCOC_T00031144001	A0A068UQ26	Putative Tetratricopeptide repeat (TPR)-like superfamily protein			-4.43219694351166	1.02988887040681e-16
Cc07_g09190	GSCOC_T00040315001	A0A068U3S0	Putative RmlC-like cupins superfamily protein	GO:0016021;GO:0045735	AT2G18540	-4.4254912897142	8.02132057947516e-11
Cc11_g08990	GSCOC_T00032801001	A0A068TWT1	Putative UDP-glucose flavonoid 3-O-glucosyltransferase 6	GO:0008194	AT4G15280	-4.41911329591829	4.94131074295131e-11
Cc02_g39490	GSCOC_T00027708001	A0A068UJF8	AP2/ERF domain-containing transcription factor	GO:0005634;GO:0003677;GO:0003700	AT1G01250	-4.41642365069151	4.21740542517499e-06
Cc02_g05600	GSCOC_T00039073001	A0A068V082	Putative WEB family protein At2g38370		AT2G40480	-4.41200381636634	2.54216903374279e-08
Cc11_g08470	GSCOC_T00032870001	A0A068TXL8	Putative Protein PLANT CADMIUM RESISTANCE 2		AT1G14870	-4.41090544532724	3.1841423017095e-26
Cc00_g34890	GSCOC_T00011347001	A0A068VR24	MATE efflux family protein		AT3G21690	-4.40998040100298	0.00149270021407313
Cc00_g16690	GSCOC_T00012625001	A0A068VI23	Putative Gibberellin 3-beta-dioxygenase 4	GO:0046872;GO:0016491	AT4G03070	-4.40440529641247	1.83673035967848e-10
Cc07_g14150	GSCOC_T00036651001	A0A068U051	MADS-box protein SVP	GO:0005634;GO:0003700;GO:0046983;GO:0000977;GO:0045944	AT2G22540	-4.40435636444789	1.87915541396308e-08
Cc10_g02240	GSCOC_T00024723001	A0A068UGW1	Auxin-induced protein 5NG4	GO:0016021;GO:0022857	AT1G75500	-4.3978084903954	1.18535405197929e-06
Cc04_g02630	GSCOC_T00021938001	A0A068TPL2	Putative downstream target of AGL15-4	GO:0016021		-4.39685649011717	4.10978707184721e-05
Cc02_g25400	GSCOC_T00028750001	A0A068UP47	Rac-like GTP-binding protein ARAC9	GO:0005525;GO:0003924;GO:0007264	AT2G44690	-4.39568442411306	0.000847161676349918
Cc07_g10200	GSCOC_T00037148001	A0A068U1A2	Beta-galactosidase 3	GO:0004565;GO:0030246;GO:0005975	AT4G36360	-4.39467164501303	6.94962668304161e-14
Cc10_g06830	GSCOC_T00034606001	A0A068U0F8	F-box protein FBW2	GO:0010629;GO:0010608;GO:0016567;GO:0009737;GO:0006511	AT4G08980	-4.39284780264058	1.91702530840464e-12
Cc05_g01940	GSCOC_T00040844001	A0A068V179	Putative UDP-glucose flavonoid 3-O-glucosyltransferase 3		AT3G21760	-4.39004496169754	1.80643487293561e-22
Cc02_g39650	GSCOC_T00027687001	A0A068UKA4	NC domain-containing protein-related			-4.3862541021962	9.01072782740269e-05
Cc02_g16340	GSCOC_T00014117001	A0A068TKT6	Major facilitator superfamily protein	GO:0016021		-4.38608817480843	2.20592343469856e-15
Cc02_g30560	GSCOC_T00023784001	A0A068UEA9	Perakine reductase		AT1G60680	-4.38127428990409	0.00405627570885384
Cc01_g11270	GSCOC_T00024252001	A0A068UFT2	Beta-galactosidase 8	GO:0004565;GO:0030246;GO:0005975	AT2G28470	-4.38125286288927	2.64926230756476e-15
Cc11_g12000	GSCOC_T00032372001	A0A068TWV0	Probable inactive purple acid phosphatase 1	GO:0003993;GO:0046872	AT1G13750	-4.37800493020075	2.02811471044552e-19
Cc05_g10320	GSCOC_T00021462001	A0A068UCV1	Interactor of constitutive active ROPs 4		AT1G78430	-4.37244581331505	8.19884225115663e-13
Cc00_g06620	GSCOC_T00007483001	A0A068VE82	Putative uncharacterized protein	GO:0003824	AT4G35420	-4.3666876231048	4.17654606578635e-09
Cc05_g10790	GSCOC_T00021397001	A0A068UBV6	TRICHOME BIREFRINGENCE-LIKE 41		AT3G14850	-4.36586596120519	9.17310509602609e-07
Cc07_g11210	GSCOC_T00037027001	A0A068U2L6	Peroxidase 64	GO:0005576;GO:0020037;GO:0046872;GO:0004601;GO:0042744;GO:0006979	AT5G42180	-4.36469187831388	0.00336792181717111
Cc08_g04220	GSCOC_T00034235001	A0A068UTB1	Putative disease resistance protein RGA1	GO:0043531;GO:0006952		-4.36331521279181	4.36232045704311e-07
Cc00_g34260	GSCOC_T00012941001	A0A068VNB2	Putative amidase C869.01		AT4G34880	-4.36147874957594	4.01596137692061e-11
Cc02_g35040	GSCOC_T00011816001	A0A068VCG1	Nicotianamine synthase	GO:0030410;GO:0030418	AT1G09240	-4.36092177870051	3.45618271528128e-10
Cc01_g19100	GSCOC_T00016102001	A0A068U5A1	Plant protein of unknown function (DUF828) with plant pleckstrin homology-like region	GO:0009734;GO:0010305;GO:0010087	AT3G63300	-4.35971656286974	7.63317095316086e-06
Cc04_g12200	GSCOC_T00005269001	A0A068V8N8	unknown protein; FUNCTIONS IN	GO:0016021		-4.35897723972302	1.51729187534786e-08
Cc06_g23300	GSCOC_T00040592001	A0A068V162	Protein of unknown function (DUF620)			-4.35092095526721	4.12665429920757e-13
Cc11_g00210	GSCOC_T00019446001	A0A068VB23	BTB/POZ domain-containing protein At3g19850		AT3G19850	-4.34653704938513	2.54692137859533e-17
Cc10_g02560	GSCOC_T00024760001	A0A068UG71	Jasmonate O-methyltransferase	GO:0030795;GO:0009694;GO:0009611	AT1G19640	-4.3458876803015	1.39120111605124e-08
Cc00_g29270	GSCOC_T00002467001	A0A068VLV7	Putative Polynucleotidyl transferase, ribonuclease H-like superfamily protein	GO:0008408;GO:0003676		-4.34154068248321	3.41496542102828e-05
Cc02_g37530	GSCOC_T00027977001	A0A068UK68	( )-neomenthol dehydrogenase		AT2G24190	-4.34103202910355	0.00354025293542038
Cc05_g08550	GSCOC_T00016879001	A0A068V602	Putative unknown protein; CONTAINS InterPro DOMAIN/s			-4.34016899239729	0.000358675922111535
Cc04_g09420	GSCOC_T00022830001	A0A068TQZ5	Putative uncharacterized protein	GO:0046983;GO:0006355	AT5G50915	-4.33964759736867	3.65954678272899e-16
Cc08_g03030	GSCOC_T00037810001	A0A068UXM2	ABC transporter B family member 2	GO:0016021;GO:0005524;GO:0016887;GO:0042626	AT4G25960	-4.33572566586988	8.05403606639316e-12
Cc11_g13740	GSCOC_T00032144001	A0A068TVG1	Putative membrane lipoprotein	GO:0030247		-4.32399606002696	2.53307579877586e-06
Cc02_g33120	GSCOC_T00015326001	A0A068V4M6	Putative uncharacterized protein	GO:0046872;GO:0030001	AT5G27690	-4.32336976689455	1.6859208839658e-18
Cc11_g15290	GSCOC_T00038039001	A0A068V022	Putative Polygalacturonase At1g48100	GO:0005576;GO:0004650;GO:0005975;GO:0071555	AT1G48100	-4.32127864481167	6.89378543794337e-05
Cc11_g05620	GSCOC_T00020525001	A0A068UB84	Serine/threonine-protein kinase BRI1-like 2	GO:0016021;GO:0005524;GO:0004674	AT2G01950	-4.3208653626831	1.47531633148918e-05
Cc04_g04910	GSCOC_T00022230001	A0A068TPJ9	Putative DeSI-like protein At4g17486			-4.31636619552574	0.000308367620536954
Cc00_g31440	GSCOC_T00006470001	A0A068VQ08	Wound-responsive family protein			-4.31437067289764	5.54220407218251e-11
Cc02_g19530	GSCOC_T00014521001	A0A068TMU3	Protein of unknown function (DUF620)			-4.31133695591512	5.46172502657015e-09
Cc00_g04110	GSCOC_T00013741001	A0A068VC79	Xylem cysteine proteinase 1	GO:0008234	AT4G35350	-4.30891586311933	1.35396696704599e-07
Cc06_g19740	GSCOC_T00029048001	A0A068UPR9	Putative Disease resistance protein At4g27190	GO:0043531		-4.30480521857312	2.15342718906106e-05
Cc00_g07930	GSCOC_T00006635001	A0A068VHR5	Protein of unknown function, DUF642			-4.29953221189332	0.00309018102422384
Cc00_g06260	GSCOC_T00010080001	A0A068VDB7	Putative Hydroxycinnamoyl-Coenzyme A shikimate/quinate hydroxycinnamoyltransferase	GO:0016747	AT2G19070	-4.29399000113483	2.57652455307889e-20
Cc03_g14830	GSCOC_T00026726001	A0A068UHT6	Putative UDP-glycosyltransferase 71C4	GO:0008194	AT1G07260	-4.29269275776762	5.54951061227738e-11
Cc02_g09480	GSCOC_T00029651001	A0A068TVC0	Putative Double Clp-N motif-containing P-loop nucleoside triphosphate hydrolases superfamily protein		AT3G52490	-4.28922449657583	0.0018795885865739
Cc11_g13820	GSCOC_T00032134001	A0A068TW60	Putative Transcription factor bHLH79	GO:0046983;GO:0006355	AT5G62610	-4.28567123434722	1.0040383507037e-14
Cc08_g01450	GSCOC_T00038384001	A0A068V0L8	Putative Ankyrin repeat-containing protein At3g12360	GO:0016021		-4.27852994587442	1.49589570631996e-08
Cc00_g05380	GSCOC_T00000535001	A0A068VG14	Hypothetical protein	GO:0016021		-4.27753783155629	8.51655330338403e-05
Cc04_g02680	GSCOC_T00021945001	A0A068TPL6	Putative GATA transcription factor 12	GO:0005634;GO:0043565;GO:0008270;GO:0045893	AT5G25830	-4.27214160415801	1.48036296177757e-05
Cc01_g02420	GSCOC_T00009711001	A0A068V9Z1	Putative Bifunctional inhibitor/lipid-transfer protein/seed storage 2S albumin superfamily protein	GO:0016021	AT2G44290	-4.25035454299582	2.63652765332621e-11
Cc02_g12240	GSCOC_T00029309001	A0A068TWD5	Major facilitator superfamily protein	GO:0016021;GO:0005337	AT4G05120	-4.24639823114524	1.27680218883096e-09
Cc10_g11920	GSCOC_T00031871001	A0A068UTF5	Quinone oxidoreductase-like protein At1g23740, chloroplastic	GO:0016491;GO:0008270	AT1G23740	-4.24349659095068	3.77932364233865e-06
Cc07_g06060	GSCOC_T00039899001	A0A068U1V4	Putative alpha/beta-Hydrolases superfamily protein	GO:0016021;GO:0006629		-4.24055013042709	7.42155112934250e-09
Cc04_g00830	GSCOC_T00021708001	A0A068TP49	Subtilisin-like protease	GO:0004252	AT3G14240	-4.22727542088922	1.91553624263656e-10
Cc00_g18700	GSCOC_T00010033001	A0A068VLB5	Putative Disease resistance protein RGA2	GO:0043531;GO:0006952		-4.2205072160457	0.000580372669489712
Cc06_g14090	GSCOC_T00041302001	A0A068U3Z2	Putative Auxin-induced protein 5NG4	GO:0016021;GO:0022857	AT4G30420	-4.20993691283534	1.604667178513e-09
Cc02_g10080	GSCOC_T00029568001	A0A068TV65	Cytochrome P450 77A3	GO:0016021;GO:0020037;GO:0005506;GO:0004497;GO:0016705	AT5G04660	-4.20240017756911	1.15775156035403e-15
Cc02_g06400	GSCOC_T00039173001	A0A068V0G5	Omega-3 fatty acid desaturase, chloroplastic	GO:0016021;GO:0006629	AT5G05580	-4.20050368749319	9.33906599355273e-29
Cc01_g12000	GSCOC_T00028119001	A0A068UMW8	Putative 125 kDa kinesin-related protein	GO:0005524;GO:0008017;GO:0003777;GO:0007018	AT3G45850	-4.20049208536124	3.10964570912916e-09
Cc08_g08830	GSCOC_T00017215001	A0A068V5U5	BURP domain-containing protein 3		AT5G25610	-4.19960396429863	1.92536843667468e-15
Cc02_g21300	GSCOC_T00014767001	A0A068TMF9	UDP-glycosyltransferase 85A2	GO:0008194	AT1G22360	-4.19617985408059	0.00104039771111013
Cc02_g11770	GSCOC_T00029373001	A0A068TTV8	Oxygen-evolving enhancer protein 3-2, chloroplastic	GO:0019898;GO:0009654;GO:0005509;GO:0015979	AT4G05180	-4.18885363071351	8.11640668975211e-11
Cc10_g08180	GSCOC_T00034427001	A0A068U017	Zinc finger (C3HC4-type RING finger) family protein	GO:0005886;GO:0061630;GO:0009630;GO:0048364	AT5G49665	-4.18330142184744	0.000867816758071413
Cc06_g06330	GSCOC_T00031396001	A0A068USM2	Putative ovate family protein 13	GO:0005634;GO:0045892	AT5G04820	-4.18256531840813	0.000198836647439661
Cc06_g23710	GSCOC_T00040535001	A0A068V0T1	Putative uncharacterized protein	GO:0042025;GO:0005634;GO:0003677;GO:0046872	AT5G43270	-4.17895048479759	9.19531311769063e-11
Cc02_g29320	GSCOC_T00018347001	A0A068V6Y9	Putative amidase C869.01		AT4G34880	-4.17824486803885	3.03427740910654e-05
Cc00_g19490	GSCOC_T00003022001	A0A068VIV3	Hypothetical protein			-4.17790668426503	1.31504792866135e-06
Cc05_g09430	GSCOC_T00021586001	A0A068UCK9	Predicted protein		AT2G42870	-4.17731081108559	0.00333033087334536
Cc02_g17170	GSCOC_T00014223001	A0A068TNS4	Beta-galactosidase 3	GO:0004565;GO:0005975	AT4G36360	-4.17649623654971	3.52429178396504e-12
Cc08_g14000	GSCOC_T00030276001	A0A068UNJ4	BAG family molecular chaperone regulator 3	GO:0051087	AT5G07220	-4.16938973313814	2.3417566632564e-12
Cc08_g11060	GSCOC_T00027097001	A0A068UIE4	Putative Probable WRKY transcription factor 50	GO:0005634;GO:0003700;GO:0043565	AT5G26170	-4.16661322112473	5.44857544705363e-14
Cc00_g31940	GSCOC_T00009627001	A0A068VMP1	UDP-glucuronate 4-epimerase 6	GO:0005768;GO:0016021;GO:0005802;GO:0050832;GO:0050829;GO:0033481	AT3G23820	-4.16591637804373	2.19579579326736e-17
Cc10_g05940	GSCOC_T00034734001	A0A068TYU9	Hypothetical protein			-4.16520905244208	6.18044702657155e-06
Cc00_g06550	GSCOC_T00005831001	A0A068VDG1	Putative Gibberellin 20 oxidase 1	GO:0046872;GO:0016491	AT5G05600	-4.16330561963002	0.000296743091796124
Cc07_g12890	GSCOC_T00036818001	A0A068TZK2	Putative B3 domain-containing protein REM17	GO:0005634;GO:0003677		-4.1632568351875	0.0087538417772172
Cc06_g06020	GSCOC_T00043172001	A0A068V3R3	SAUR-like auxin-responsive protein family	GO:0009733	AT4G34760	-4.15982115745338	0.00446606382428856
Cc02_g39910	GSCOC_T00027643001	A0A068ULY5	IQ-domain 18		AT1G74690	-4.15794324388017	0.000338854355167263
Cc02_g14920	GSCOC_T00013918001	A0A068TN61	Putative Endoribonuclease Dicer homolog 2	GO:0004525;GO:0006396	AT3G03300	-4.15402353665849	1.01898813539633e-06
Cc10_g16210	GSCOC_T00033837001	A0A068UT97	Chlorophyll a-b binding protein CP26, chloroplastic	GO:0009535;GO:0016021;GO:0009522;GO:0009523;GO:0016168;GO:0009765;GO:0018298	AT4G10340	-4.15161409274055	1.05624917925281e-10
Cc05_g14320	GSCOC_T00038832001	A0A068UZW6	65-kDa microtubule-associated protein 1	GO:0008017;GO:0000226	AT4G26760	-4.14618214566848	1.15808618412157e-13
Cc01_g03290	GSCOC_T00033134001	A0A068US19	Nucleotide-diphospho-sugar transferases superfamily protein		AT1G64980	-4.1451990314461	2.5380180206942e-15
Cc02_g34070	GSCOC_T00000642001	A0A068V9K6	Putative uncharacterized protein	GO:0046983	AT4G37850	-4.14339463332073	3.88738125343887e-10
Cc10_g15770	GSCOC_T00033771001	A0A068UV32	Putative Protein ASPARTIC PROTEASE IN GUARD CELL 1	GO:0004190;GO:0043067	AT1G09750	-4.14137322751016	0.000993822626075659
Cc02_g25800	GSCOC_T00028696001	A0A068UP14	Putative Protein WAX2	GO:0016021;GO:0005506;GO:0016491;GO:0008610	AT1G02205	-4.13284336991094	2.03242131721218e-07
Cc07_g06860	GSCOC_T00040011001	A0A068U229	Putative uncharacterized protein			-4.12964148534814	6.88891570340681e-05
Cc11_g06880	GSCOC_T00020720001	A0A068UAJ6	Putative peptide/nitrate transporter At2g38100	GO:0016021;GO:0022857		-4.12662112048526	0.000414389538767001
Cc01_g21620	GSCOC_T00004958001	A0A068V8S9	Long chain acyl-CoA synthetase 1	GO:0003824	AT2G47240	-4.12657126751968	7.2431520210353e-15
Cc06_g23290	GSCOC_T00040593001	A0A068V340	Protein of unknown function (DUF620)			-4.11670019775508	3.73845764924941e-08
Cc02_g17600	GSCOC_T00014280001	A0A068TLD9	Probable receptor-like serine/threonine-protein kinase At4g34500	GO:0016021;GO:0005524;GO:0004674	AT4G34500	-4.1143471372051	6.81114208614185e-05
Cc09_g06910	GSCOC_T00003645001	A0A068VK49	L-type lectin-domain containing receptor kinase IV.1	GO:0016021;GO:0005524;GO:0030246;GO:0004672	AT2G37710	-4.10739115797015	2.77924536736809e-09
Cc07_g14790	GSCOC_T00036568001	A0A068TYW1	Putative Probable serine/threonine-protein kinase Cx32, chloroplastic	GO:0005524;GO:0004672	AT2G17220	-4.10536472010286	0.00134704849778666
Cc11_g16950	GSCOC_T00038248001	A0A068UYM0	Putative uncharacterized protein			-4.09927003924443	0.000179180128873676
Cc02_g07110	GSCOC_T00009473001	A0A068VIZ1	Protein of unknown function (DUF620)			-4.09880844940096	0.00295561843962334
Cc11_g11680	GSCOC_T00032413001	A0A068TW20	Putative uncharacterized protein	GO:0016021		-4.09671097987004	2.16123550726593e-10
Cc02_g22480	GSCOC_T00014919001	A0A068TNL5	maternal effect embryo arrest 9	GO:0005886;GO:0009506;GO:0009793;GO:0009555		-4.09531531040283	9.52995407351744e-12
Cc02_g05400	GSCOC_T00039048001	A0A068V065	RING-H2 finger protein ATL72	GO:0016021	AT3G10910	-4.08941582227974	1.01906513240958e-14
Cc07_g00050	GSCOC_T00019067001	A0A068V7T4	GDSL esterase/lipase At5g14450	GO:0016788	AT5G14450	-4.0888582817802	0.000213173630812416
Cc06_g22070	GSCOC_T00017141001	A0A068V616	Cytochrome P450 83B1	GO:0020037;GO:0005506;GO:0004497;GO:0016705		-4.07521290062714	0.00378463312625358
Cc08_g08860	GSCOC_T00017220001	A0A068V891	Putative Dehydration-responsive protein RD22		AT5G25610	-4.07449893497688	4.43645011102929e-15
Cc03_g13610	GSCOC_T00031705001	A0A068UT69	L-type lectin-domain containing receptor kinase IV.1	GO:0005524;GO:0030246;GO:0004672		-4.07368210022769	0.00875270078688556
Cc02_g01990	GSCOC_T00020041001	A0A068U967	Probable inactive receptor kinase At4g23740	GO:0016021;GO:0005524;GO:0004672	AT4G23740	-4.07167764428841	7.72631083950501e-14
Cc10_g01640	GSCOC_T00024647001	A0A068UGQ6	Tubulin beta-1 chain	GO:0005737;GO:0005874;GO:0005525;GO:0003924;GO:0005200;GO:0007017	AT1G75780	-4.06710481375545	7.09719228618214e-20
Cc11_g10570	GSCOC_T00032560001	A0A068TX04	Putative leucine-rich repeat receptor-like serine/threonine-protein kinase At2g14440	GO:0005768;GO:0016021;GO:0005886;GO:0005802;GO:0005773		-4.06428396996743	5.49729575467388e-11
Cc00_g05690	GSCOC_T00011954001	A0A068VDS0	Putative amidase C869.01		AT4G34880	-4.06379382013589	7.72881922161624e-08
Cc06_g15420	GSCOC_T00030830001	A0A068UNX2	Putative Acidic mammalian chitinase	GO:0008061;GO:0005975	AT4G19810	-4.06372518790992	6.17901393185841e-06
Cc05_g04740	GSCOC_T00035009001	A0A068UTP1	Aromatic-L-amino-acid decarboxylase	GO:0016831;GO:0030170;GO:0006520	AT2G20340	-4.05874759193797	2.91979049176506e-05
Cc04_g15100	GSCOC_T00002593001	A0A068VF66	Galactoside 2-alpha-L-fucosyltransferase	GO:0032580;GO:0016021;GO:0008107;GO:0042546;GO:0071555	AT2G03220	-4.05479694527942	0.00237342006437521
Cc01_g15790	GSCOC_T00016517001	A0A068U6Q1	Uncharacterized protein	GO:0016021	AT3G25500	-4.05324879546269	1.33068748952906e-12
Cc06_g06470	GSCOC_T00031379001	A0A068UQS8	Putative uncharacterized protein	GO:0016021		-4.04912544920456	3.41297580141413e-09
Cc00_g33220	GSCOC_T00002332001	A0A068VMZ3	Hypothetical protein	GO:0016021		-4.04840608822339	2.47341749560732e-05
Cc07_g15520	GSCOC_T00036465001	A0A068TZC4	Putative Protein of unknown function (DUF581)		AT1G78020	-4.04607571825795	1.2246281150951e-10
Cc03_g05450	GSCOC_T00026300001	A0A068TSN3	Probable inorganic phosphate transporter 1-3	GO:0016021;GO:0005315;GO:0006817	AT2G38940	-4.04583606511645	1.47578338042041e-12
Cc01_g17930	GSCOC_T00016263001	A0A068U856	Cellulose synthase A catalytic subunit 4 [UDP-forming]	GO:0016021;GO:0005886;GO:0016760;GO:0046872;GO:0071555;GO:0030244;GO:0009834	AT5G44030	-4.04329408582997	0.000176254325872765
Cc03_g08680	GSCOC_T00033298001	A0A068USF2	Putative Probable LRR receptor-like serine/threonine-protein kinase At4g08850	GO:0016021;GO:0005524;GO:0004672	AT4G08850	-4.03837987715083	0.00103939433220306
Cc00_g31720	GSCOC_T00009492001	A0A068VMK4	Putative GDSL esterase/lipase 1	GO:0016021;GO:0016788		-4.03755508170841	0.00291742044785214
Cc03_g06020	GSCOC_T00026378001	A0A068TVB4	Putative Actin-related protein 2/3 complex subunit 2	GO:0005885;GO:0005737;GO:0003779;GO:0030041;GO:0034314	AT2G33385	-4.01813861187315	0.000209350869111959
Cc04_g05440	GSCOC_T00022295001	A0A068TSE7	Protein WAX2	GO:0016021;GO:0005506;GO:0016491;GO:0008610	AT5G57800	-4.01778975496874	0.000850256970977136
Cc11_g02900	GSCOC_T00025510001	A0A068UK12	Putative Probable disease resistance RPP8-like protein 2	GO:0043531;GO:0006952		-4.01676096462009	2.53088497288365e-06
Cc02_g16660	GSCOC_T00014159001	A0A068TLV5	Putative Aquaporin AQPcic	GO:0016021;GO:0015267		-4.01041613276562	1.96920312988545e-05
Cc04_g02940	GSCOC_T00021978001	A0A068TRM2	Probable peptide transporter At1g52190	GO:0016021;GO:0022857	AT1G52190	-4.00532532881083	1.17182214179104e-16
Cc08_g10440	GSCOC_T00027011001	A0A068UKX6	Putative uncharacterized protein	GO:0005634;GO:0003677;GO:0006355		-4.00393212074011	0.00425834767076764
Cc11_g07400	GSCOC_T00018057001	A0A068V6X3	Protein of unknown function (DUF1295)	GO:0016021;GO:0016627;GO:0006629		-4.00261504672844	4.08371797523747e-11
Cc11_g08480	GSCOC_T00032866001	A0A068TX31	Putative Protein PLANT CADMIUM RESISTANCE 2		AT1G14870	-4.00247076659315	6.8751292374661e-09
Cc07_g19990	GSCOC_T00033911001	A0A068UTE0	Putative Auxin-induced protein 5NG4	GO:0016021;GO:0022857		-4.00200782595486	0.000675475232092824
Cc00_g11000	GSCOC_T00000138001	A0A068VFV5	Secologanin synthase	GO:0016021;GO:0020037;GO:0005506;GO:0004497;GO:0016705	AT3G14690	-4.00078845222324	1.16335516554867e-05
Cc04_g08610	GSCOC_T00022727001	A0A068TQI0	Putative Disease resistance protein RPP13	GO:0043531;GO:0006952		-3.99850911025448	9.27389590462342e-06
Cc04_g02340	GSCOC_T00021905001	A0A068TRF6	Putative uncharacterized protein	GO:0046983	AT3G21330	-3.99771370669188	4.21646418623783e-14
Cc08_g04630	GSCOC_T00015666001	A0A068V4M7	Pectinacetylesterase family protein	GO:0005618;GO:0005576;GO:0016787;GO:0071555	AT4G19420	-3.9959609345059	3.43386207655231e-28
Cc08_g01300	GSCOC_T00038405001	A0A068V0M9	photosystem II subunit X	GO:0016021;GO:0009523;GO:0015979		-3.99444561973395	8.07767811631832e-08
Cc09_g02010	GSCOC_T00017735001	A0A068U7U0	Chlorophyll a-b binding protein 6A, chloroplastic	GO:0009535;GO:0016021;GO:0009522;GO:0009523;GO:0016168;GO:0009765;GO:0018298	AT3G54890	-3.99308169151052	2.18421153400385e-07
Cc02_g21310	GSCOC_T00014768001	A0A068TN25	UDP-glycosyltransferase 85A3	GO:0008194	AT1G22380	-3.99281351910942	1.34809530962222e-05
Cc03_g15040	GSCOC_T00026761001	A0A068UIE7	Putative uncharacterized protein	GO:0016021	AT3G25500	-3.99206425367705	3.13744550328216e-10
Cc11_g14400	GSCOC_T00032063001	A0A068TWA0	Putative Auxin-induced protein 5NG4	GO:0016021;GO:0022857	AT3G28050	-3.99082134980125	1.57132883461514e-09
Cc09_g05150	GSCOC_T00007088001	A0A068VCB3	Putative Cytochrome P450 89A2	GO:0016021;GO:0020037;GO:0005506;GO:0004497;GO:0016705	AT1G64900	-3.98921620615166	1.03752609533708e-07
Cc09_g00420	GSCOC_T00017952001	A0A068U7N1	Oligopeptide transporter 3	GO:0016021;GO:0055085	AT4G16370	-3.98799144504565	4.06357480297417e-12
Cc06_g23280	GSCOC_T00040594001	A0A068V1C0	Photosystem II 5 kDa protein, chloroplastic		AT3G21055	-3.98552104514152	2.38668592249236e-10
Cc02_g30120	GSCOC_T00038966001	A0A068UZK6	Putative IQ-domain 11		AT1G74690	-3.98357291896357	9.63424235416543e-06
Cc08_g14420	GSCOC_T00030224001	A0A068UNA2	Putative Myosin heavy chain-related protein			-3.98304870078889	9.14333078285857e-08
Cc05_g09960	GSCOC_T00021519001	A0A068UES8	CASP-like protein VIT_01s0010g01870	GO:0016021;GO:0005886	AT1G17200	-3.98161545824547	0.000366795569350282
Cc01_g08460	GSCOC_T00010703001	A0A068VKN8	Putative Hydroxycinnamoyl-Coenzyme A shikimate/quinate hydroxycinnamoyltransferase	GO:0016747	AT2G19070	-3.95772009097152	7.10324584578324e-06
Cc07_g09850	GSCOC_T00037190001	A0A068U1D8	Mannan endo-1,4-beta-mannosidase 7	GO:0004553;GO:0005975	AT5G66460	-3.95267066205333	3.04129794000517e-06
Cc00_g25450	GSCOC_T00002062001	A0A068VKJ5	Putative Probable LRR receptor-like serine/threonine-protein kinase At4g08850	GO:0005524;GO:0004672	AT4G08850	-3.95233499630151	0.000510946562766215
Cc00_g12970	GSCOC_T00005419001	A0A068VH01	8-hydroxyquercetin 8-O-methyltransferase	GO:0008171;GO:0046983;GO:0032259		-3.95057802029777	1.30749228159324e-09
Cc02_g11300	GSCOC_T00029428001	A0A068TUQ3	Auxin response factor 18	GO:0005634;GO:0003677;GO:0009734;GO:0051301;GO:0007389;GO:0006355;GO:0048829	AT4G30080	-3.94583381892857	2.88782314947336e-16
Cc08_g15060	GSCOC_T00035430001	A0A068UUF6	Putative phosphoglycerate mutase DET1	GO:0003824	AT3G05170	-3.94339762223579	2.53331833481122e-10
Cc05_g10860	GSCOC_T00021388001	A0A068UEH9	Probable leucine-rich repeat receptor-like serine/threonine-protein kinase At3g14840	GO:0016021;GO:0005524;GO:0004672		-3.94226362545162	0.00936475748987906
Cc10_g14810	GSCOC_T00033629001	A0A068USV3	Putative Auxin-induced protein 5NG4	GO:0016021;GO:0022857	AT1G43650	-3.94112972229074	3.38548059312339e-05
Cc07_g17470	GSCOC_T00037426001	A0A068UYS7	Putative G-type lectin S-receptor-like serine/threonine-protein kinase RLK1	GO:0016021;GO:0005524;GO:0004674;GO:0048544		-3.93867902852435	0.000219629280458716
Cc05_g14940	GSCOC_T00038756001	A0A068UZL1	Fasciclin-like arabinogalactan protein 1	GO:0046658;GO:0005618;GO:0048364;GO:0048367	AT5G55730	-3.93091225212159	0.00062320699674312
Cc11_g05710	GSCOC_T00020539001	A0A068UCV4	Hypothetical protein			-3.92797592070835	1.41568378987015e-06
Cc02_g32130	GSCOC_T00018930001	A0A068V7L6	Probable inactive leucine-rich repeat receptor-like protein kinase At3g03770	GO:0016021;GO:0005524;GO:0004672	AT3G03770	-3.92652151697609	7.49030657792218e-17
Cc03_g08750	GSCOC_T00033310001	A0A068USM0	Putative Probable LRR receptor-like serine/threonine-protein kinase At4g08850	GO:0016021;GO:0005524;GO:0004672		-3.92608478067996	0.00355987989133983
Cc02_g05340	GSCOC_T00039040001	A0A068V1Y2	Putative Probably inactive leucine-rich repeat receptor-like protein kinase At3g28040	GO:0016021;GO:0005886;GO:0005524;GO:0004672	AT3G56370	-3.92550889678178	0.000180997021181221
Cc10_g05840	GSCOC_T00034756001	A0A068TYV5	Putative Protein of unknown function (DUF581)		AT1G78020	-3.92031261610369	2.31156147504078e-14
Cc04_g14280	GSCOC_T00001598001	A0A068VBL5	Alpha-galactosidase	GO:0052692;GO:0005975	AT5G08370	-3.91883536233362	0.000103408161390787
Cc01_g08180	GSCOC_T00015510001	A0A068V505	Putative Receptor-like protein 12	GO:0016021	AT2G33030	-3.91854574013591	7.35174606527507e-05
Cc02_g37070	GSCOC_T00028040001	A0A068UKS1	Putative Transcription factor TCP19	GO:0003700		-3.91346663427831	0.00321535402219095
Cc10_g15250	GSCOC_T00033698001	A0A068USM9	Probable LRR receptor-like serine/threonine-protein kinase At4g08850	GO:0016021;GO:0005524;GO:0004672	AT4G08850	-3.9111767040025	0.000409518605369466
Cc04_g00430	GSCOC_T00021652001	A0A068TP27	Receptor-like protein kinase	GO:0016021;GO:0005524;GO:0004674	AT1G17750	-3.91059126490561	1.14607413261075e-07
Cc10_g12590	GSCOC_T00031977001	A0A068UQZ6	Photosystem I reaction center subunit N, chloroplastic	GO:0009522;GO:0015979		-3.9094141123181	8.10970069631961e-09
Cc10_g15220	GSCOC_T00033691001	A0A068UUX4	Putative Probable LRR receptor-like serine/threonine-protein kinase At4g08850	GO:0016021;GO:0005524;GO:0004672	AT4G08850	-3.90442592464665	1.35586681147301e-07
Cc02_g23060	GSCOC_T00014985001	A0A068TNM1	Lactoylglutathione lyase / glyoxalase I family protein			-3.90189508401097	9.51512031698341e-12
Cc00_g34910	GSCOC_T00006527001	A0A068VN38	Putative 3-hydroxyacyl-CoA dehydratase 1	GO:0003824	AT4G14430	-3.90044014676171	1.52119381228608e-05
Cc04_g03570	GSCOC_T00022052001	A0A068TP97	F-box/kelch-repeat protein At1g80440		AT1G80440	-3.89982670100896	9.6343451871598e-05
Cc05_g15690	GSCOC_T00038657001	A0A068UZC0	Hypothetical protein		AT1G55670	-3.8887253967599	0.00356134100970405
Cc03_g01750	GSCOC_T00025797001	A0A068TRJ1	Putative Transducin/WD40 repeat-like superfamily protein			-3.88738608779204	9.68138904979074e-07
Cc00_g05290	GSCOC_T00010372001	A0A068VDH9	Putative Probable leucine-rich repeat receptor-like protein kinase At1g35710	GO:0016021;GO:0005524;GO:0004672	AT1G35710	-3.88128865420045	3.16555193079508e-06
Cc03_g14880	GSCOC_T00026734001	A0A068UHT9	Putative disease resistance protein RGA4	GO:0008194	AT5G03490	-3.87744779275562	0.000253364659836481
Cc05_g11110	GSCOC_T00021357001	A0A068UEF2	Hypothetical protein	GO:0003676		-3.87571866868292	0.00808238125632066
Cc07_g07090	GSCOC_T00040045001	A0A068U370	Protein SHORT-ROOT	GO:0005634;GO:0003700;GO:0043565;GO:0008356;GO:0048366;GO:0009956	AT4G37650	-3.87560757626806	0.000976151450856893
Cc05_g02390	GSCOC_T00020988001	A0A068UC30	Iron-sulfur assembly protein IscA-like 1, mitochondrial	GO:0051536;GO:0005198;GO:0097428	AT2G36260	-3.86949835038719	3.81698592559599e-05
Cc09_g00350	GSCOC_T00017960001	A0A068UA88	Putative Pollen Ole e 1 allergen and extensin family protein			-3.86520300365865	0.00198795891878982
Cc11_g11950	GSCOC_T00032378001	A0A068TWV6	Putative unknown protein; BEST Arabidopsis thaliana protein match is	GO:0008356		-3.86086530629249	5.63405340018252e-13
Cc07_g07190	GSCOC_T00040057001	A0A068U382	Putative unknown protein; FUNCTIONS IN			-3.85929747700465	9.69948862548975e-09
Cc07_g19950	GSCOC_T00033902001	A0A068UVB1	Hypothetical protein			-3.85903318890836	1.16189875803661e-13
Cc11_g08850	GSCOC_T00032819001	A0A068TXW8	Putative Spore coat protein A	GO:0005507;GO:0016491	AT1G71040	-3.85741715418088	6.20668515151899e-23
Cc03_g14190	GSCOC_T00031813001	A0A068UR09	Basic endochitinase	GO:0004553;GO:0005975	AT5G24090	-3.85243652853072	2.44648889972651e-09
Cc06_g01400	GSCOC_T00023358001	A0A068UE54	Vacuolar cation/proton exchanger 1	GO:0016021;GO:0005774;GO:0015369	AT2G38170	-3.85027977826089	1.63375747841052e-11
Cc09_g10110	GSCOC_T00041090001	A0A068V1X2	Putative Subtilisin-like protease	GO:0004252	AT5G45650	-3.84855916769638	1.35586681147301e-07
Cc00_g16320	GSCOC_T00010874001	A0A068VHP1	Putative Probable receptor-like protein kinase At5g39030	GO:0005524;GO:0004672	AT5G38280	-3.84475920684364	4.71326245199954e-06
Cc06_g12990	GSCOC_T00041464001	A0A068U4C1	Putative hydroxyproline-rich glycoprotein family protein			-3.84323238701018	1.76048356706034e-09
Cc02_g02310	GSCOC_T00020082001	A0A068UA19	Putative uncharacterized protein	GO:0016021	AT5G52780	-3.84221452978129	6.75706546426828e-07
Cc11_g13330	GSCOC_T00032194001	A0A068TVN3	myb domain protein 88	GO:0005634;GO:0003677	AT2G02820	-3.84204508326893	9.62870657061016e-10
Cc07_g06810	GSCOC_T00040006001	A0A068U224	Hypothetical protein	GO:0000062	AT4G27780	-3.8410084291363	8.51540644240369e-05
Cc08_g14470	GSCOC_T00030219001	A0A068UN97	Putative O-glucosyltransferase rumi homolog			-3.83178549095627	9.76231222353605e-05
Cc08_g15930	GSCOC_T00035539001	A0A068UWY9	Putative uncharacterized protein		AT2G19170	-3.82920727224966	0.000253815732102776
Cc07_g17860	GSCOC_T00018835001	A0A068U8F7	Putative Transducin/WD40 repeat-like superfamily protein			-3.82559233908969	0.00151109633172969
Cc04_g06970	GSCOC_T00022498001	A0A068TQ84	Calmodulin binding protein-like	GO:0005634;GO:0005516;GO:0003700;GO:0043565;GO:0071219;GO:0042742;GO:0002229;GO:1900426;GO:0080142;GO:0010112;GO:0010224	AT1G73805	-3.8208004124523	3.45663963036952e-07
Cc07_g04230	GSCOC_T00039675001	A0A068U3X5	Putative hydroxyproline-rich glycoprotein family protein			-3.8202914848553	0.00171560608761617
Cc04_g10530	GSCOC_T00042605001	A0A068V2N5	GDSL esterase/lipase At3g48460	GO:0016788	AT3G48460	-3.81515010188193	1.93093979431e-15
Cc02_g08500	GSCOC_T00029785001	A0A068TVE2	Plant protein 1589 of unknown function			-3.81491907227374	0.000557802028661855
Cc10_g01860	GSCOC_T00024675001	A0A068UG08	Auxin-induced protein 15A	GO:0009733	AT4G34760	-3.81270400758791	1.57990026050407e-10
Cc00_g00530	GSCOC_T00036141001	A0A068UVF0	Putative Probable receptor-like protein kinase At5g39030	GO:0005524;GO:0004674	AT5G38280	-3.80870233487264	5.61256291142113e-14
Cc00_g06060	GSCOC_T00000135001	A0A068VDY0	Putative Lactase-phlorizin hydrolase	GO:0004553;GO:0005975	AT1G02850	-3.80537106970128	9.97112482526009e-10
Cc10_g01440	GSCOC_T00024615001	A0A068UGN6	ABC transporter B family member 13	GO:0016021;GO:0005524;GO:0016887;GO:0042626	AT1G27940	-3.80498818735281	4.7406131699142e-10
Cc00_g29880	GSCOC_T00006934001	A0A068VLT8	8-hydroxyquercetin 8-O-methyltransferase	GO:0008171;GO:0046983;GO:0032259		-3.80147183801846	9.26547974180193e-07
Cc09_g06080	GSCOC_T00033365001	A0A068URV6	Putative Probable LRR receptor-like serine/threonine-protein kinase At3g47570	GO:0016021;GO:0005524;GO:0004674	AT5G18500	-3.79201915555366	0.00146375402091318
Cc06_g10450	GSCOC_T00041778001	A0A068U6N0	Senescence/dehydration-associated protein-related			-3.79150090071969	0.000266531423067959
Cc02_g04550	GSCOC_T00020372001	A0A068UA56	Hexose carrier protein HEX6	GO:0016021;GO:0022857	AT5G61520	-3.79127118151338	0.000124074687885125
Cc08_g00560	GSCOC_T00038501001	A0A068UYZ3	Putative Auxin-responsive protein IAA29	GO:0005634;GO:0009734;GO:0006355	AT3G17600	-3.78682284062577	0.0001520779153584
Cc04_g08520	GSCOC_T00022714001	A0A068TQN7	Putative GDSL esterase/lipase At5g03980	GO:0016788	AT5G03980	-3.78421613064783	0.000146738135383647
Cc00_g26670	GSCOC_T00002359001	A0A068VNN3	Putative disease resistance protein RGA4	GO:0043531;GO:0006952		-3.78084853034053	0.000790763555708893
Cc00_g05170	GSCOC_T00000315001	A0A068VCP2	Putative Cytochrome P450 86B1	GO:0020037;GO:0005506;GO:0004497;GO:0016705	AT1G57750	-3.77836097296021	2.41321138334749e-11
Cc06_g20050	GSCOC_T00022903001	A0A068UDG9	plectin-related	GO:0003779;GO:0007015;GO:0010119	AT2G26770	-3.77772652188526	2.19013657356669e-09
Cc03_g01370	GSCOC_T00025749001	A0A068TTZ5	S-adenosyl-L-methionine-dependent methyltransferases superfamily protein			-3.7735932721996	2.69419948506359e-06
Cc03_g12410	GSCOC_T00015223001	A0A068U4L0	Chitinase 2	GO:0004553;GO:0005975		-3.77180426491005	1.01525466107253e-07
Cc07_g14490	GSCOC_T00036609001	A0A068TYZ4	Putative uncharacterized protein	GO:0051015;GO:0004553;GO:0030674;GO:0007015;GO:0005975		-3.77014313458123	2.69261016693307e-06
Cc06_g04260	GSCOC_T00023738001	A0A068UE04	ABC transporter B family member 1	GO:0016021;GO:0005524;GO:0016887;GO:0042626	AT2G36910	-3.7695347112981	1.3854553462085e-10
Cc02_g28170	GSCOC_T00025184001	A0A068UHP8	DNA topoisomerase 2	GO:0005524;GO:0003677;GO:0003918;GO:0006265	AT3G23890	-3.76933262054828	0.00100455344767605
Cc08_g02700	GSCOC_T00037754001	A0A068UXN2	Carboxylesterase 1	GO:0016787	AT5G62180	-3.76669780430729	1.16506795985449e-07
Cc04_g01990	GSCOC_T00021864001	A0A068TRC2	Beta-galactosidase	GO:0009505;GO:0009506;GO:0004565;GO:0030246;GO:0005975	AT3G13750	-3.76259838270513	3.79463356365056e-11
Cc00_g30720	GSCOC_T00002466001	A0A068VM24	Hypothetical protein			-3.75939776713852	0.00240295248982202
Cc11_g14140	GSCOC_T00032100001	A0A068TVC9	Putative Uncharacterized WD repeat-containing protein alr3466		AT2G26490	-3.75581875118529	2.79624015634362e-05
Cc02_g38260	GSCOC_T00027886001	A0A068UMF4	G-type lectin S-receptor-like serine/threonine-protein kinase SD2-2	GO:0016021;GO:0005524;GO:0004674;GO:0048544	AT2G19130	-3.75486899075606	1.00449234554094e-07
Cc02_g14230	GSCOC_T00013829001	A0A068TLD8	Rac-like GTP-binding protein 7	GO:0005525;GO:0003924;GO:0007264		-3.75376043585721	0.00544806042719425
Cc10_g15010	GSCOC_T00033663001	A0A068USW9	Probable cellulose synthase A catalytic subunit 9 [UDP-forming]	GO:0016021;GO:0005886;GO:0016760;GO:0046872;GO:0071555;GO:0030244	AT5G64740	-3.75225581410406	3.18932157714979e-12
Cc07_g15160	GSCOC_T00036511001	A0A068U1H4	Putative uncharacterized protein	GO:0016021		-3.75020660982885	0.00070620666936051
Cc02_g04920	GSCOC_T00038983001	A0A068UZL2	Metacaspase-1		AT1G02170	-3.74169742322843	2.43589794452022e-08
Cc11_g12510	GSCOC_T00032309001	A0A068TYF0	Probable S-acyltransferase At1g69420	GO:0016021;GO:0019706	AT1G69420	-3.74144330279739	0.000119729904969388
Cc01_g16120	GSCOC_T00016479001	A0A068U6Z9	Fimbrin-like protein 2	GO:0051015;GO:0051017	AT5G48460	-3.74114863778106	1.46688891880576e-06
Cc06_g16330	GSCOC_T00030708001	A0A068UPC7	Cytochrome P450 93A1	GO:0016021;GO:0020037;GO:0005506;GO:0016705	AT3G20130	-3.74073463285761	0.000215553789814161
Cc08_g12830	GSCOC_T00030424001	A0A068UN90	unknown protein; BEST Arabidopsis thaliana protein match is			-3.73272021900564	0.00123001944248481
Cc06_g17820	GSCOC_T00040373001	A0A068V0R3	Zeatin O-glucosyltransferase	GO:0008194	AT3G11340	-3.72884748307661	2.81342361000379e-18
Cc10_g11220	GSCOC_T00018468001	A0A068V7G0	UDP-glycosyltransferase 85A1	GO:0008194	AT1G22400	-3.71752165869615	1.27067792463493e-06
Cc00_g05620	GSCOC_T00011946001	A0A068VD23	Putative amidase C869.01		AT4G34880	-3.71627364752271	1.36884539554436e-05
Cc03_g13800	GSCOC_T00031735001	A0A068URA8	Hypothetical protein	GO:0043531;GO:0046872;GO:0030001	AT5G19090	-3.71596891164271	0.0069657378974639
Cc02_g26410	GSCOC_T00028611001	A0A068ULZ0	Putative Glutathione transferase GST 23		AT2G29420	-3.70765922370608	2.23999162658834e-17
Cc05_g11180	GSCOC_T00021348001	A0A068UBX9	Phosphoenolpyruvate carboxylase	GO:0008964;GO:0015977;GO:0006099	AT3G14940	-3.69833102728832	1.59699255922867e-09
Cc03_g02360	GSCOC_T00025878001	A0A068TS86	Probable serine/threonine-protein kinase At1g54610	GO:0005524;GO:0004672		-3.69561208033321	0.00209730040952851
Cc11_g06970	GSCOC_T00020735001	A0A068UBN9	RNA-dependent RNA polymerase 1	GO:0003723;GO:0003968;GO:0031047	AT1G14790	-3.68960678810913	0.00225088426192709
Cc00_g25490	GSCOC_T00000226001	A0A068VKU2	Putative 8-hydroxyquercetin 8-O-methyltransferase	GO:0008171;GO:0046983;GO:0032259		-3.68342091437554	6.90159284688246e-10
Cc03_g10960	GSCOC_T00042041001	A0A068V2B7	Cytochrome P450 71A2	GO:0020037;GO:0005506;GO:0004497;GO:0016705		-3.68130614032323	0.00646727399391631
Cc02_g19000	GSCOC_T00014462001	A0A068TLZ1	Putative Filament-like plant protein 7			-3.68006912486896	4.93385379512498e-15
Cc00_g31160	GSCOC_T00012545001	A0A068VLX3	Putative Hydroxycinnamoyl-Coenzyme A shikimate/quinate hydroxycinnamoyltransferase	GO:0016747	AT2G19070	-3.67230151524532	0.000571983527489295
Cc02_g26690	GSCOC_T00024970001	A0A068UHG8	Protein of Unknown Function (DUF239)			-3.66959045851947	3.81147675400586e-11
Cc08_g01190	GSCOC_T00038420001	A0A068UYY5	Putative Glyoxylate reductase	GO:0051287;GO:0016616	AT1G12550	-3.66658624428499	0.000598783310881923
Cc11_g14290	GSCOC_T00032077001	A0A068TVC1	Cyclin-D1-1	GO:0042025	AT1G70210	-3.66307182547864	5.87843221094078e-13
Cc07_g15630	GSCOC_T00036453001	A0A068TYR9	Peptidyl-prolyl cis-trans isomerase FKBP16-2, chloroplastic	GO:0003755	AT4G39710	-3.65846903280576	1.26446265233915e-06
Cc04_g08120	GSCOC_T00022662001	A0A068TQJ1	Tropinone reductase homolog	GO:0016491	AT5G06060	-3.6571224375569	4.28856102283555e-06
Cc02_g15110	GSCOC_T00013945001	A0A068TLF7	Putative Protein of unknown function (DUF688)			-3.65041844481477	1.84528824130974e-05
Cc04_g05670	GSCOC_T00022331001	A0A068TPX9	Phospholipase A1-IIdelta	GO:0008970;GO:0006629	AT2G42690	-3.65011072327989	3.12887837153694e-06
Cc11_g10480	GSCOC_T00032571001	A0A068TWF4	Lysine histidine transporter-like 6	GO:0016021	AT1G25530	-3.64301614999474	1.931771387783e-05
Cc01_g09870	GSCOC_T00024057001	A0A068UFB7	Putative Hyoscyamine 6-dioxygenase	GO:0046872;GO:0016491		-3.64141670148612	1.26633125194719e-06
Cc03_g03330	GSCOC_T00026017001	A0A068TSS5	Glucose-1-phosphate adenylyltransferase large subunit 1, chloroplastic	GO:0009941;GO:0009570;GO:0005524;GO:0008878;GO:0005978;GO:0019252	AT5G19220	-3.64019565319469	2.58785277596832e-07
Cc06_g13390	GSCOC_T00041403001	A0A068U477	CASP-like protein 3	GO:0016021;GO:0005886	AT4G25830	-3.63373769351059	3.50486088171232e-07
Cc07_g02470	GSCOC_T00039442001	A0A068U1H3	Putative Auxin-induced protein 5NG4	GO:0016021;GO:0022857	AT3G28050	-3.63130473771043	5.92716507778791e-08
Cc01_g00080	GSCOC_T00012431001	A0A068VCN1	Protein of Unknown Function (DUF239)	GO:0016021		-3.6288211768486	1.1369775372633e-09
Cc00_g11540	GSCOC_T00003163001	A0A068VGJ6	Putative disease resistance protein RGA1			-3.62866302461548	0.00786778460690761
Cc01_g02560	GSCOC_T00009683001	A0A068VCD5	Amino acid permease family protein	GO:0016021;GO:0022857	AT3G13620	-3.62807307093597	0.000289670590564239
Cc05_g12860	GSCOC_T00021133001	A0A068UDX9	G-type lectin S-receptor-like serine/threonine-protein kinase At4g27290	GO:0005524;GO:0004674;GO:0048544	AT4G27290	-3.62660545954957	1.36310362788547e-15
Cc02_g10370	GSCOC_T00029536001	A0A068TU74	Putative Bark storage protein A	GO:0003824;GO:0009116		-3.62523485316268	0.00116899593197308
Cc03_g13830	GSCOC_T00031739001	A0A068UQL9	Putative Peptidase A22B, signal peptide peptidase	GO:0016021;GO:0004190		-3.61646245610792	0.00469734504217624
Cc01_g11930	GSCOC_T00028109001	A0A068UKF6	Phototropin-1	GO:0009986;GO:0009898;GO:0005773;GO:0005524;GO:0009882;GO:0010181;GO:0042802;GO:0003729;GO:0004674;GO:0009904;GO:0009903;GO:0007623;GO:0010362;GO:0009638;GO:0046777;GO:0010155;GO:0010119	AT3G45780	-3.61139495594554	2.22687581980295e-10
Cc05_g04890	GSCOC_T00035027001	A0A068UTQ3	Glucose-6-phosphate/phosphate translocator 2, chloroplastic	GO:0016021;GO:0022857	AT1G61800	-3.60973319741818	1.69525831689931e-17
Cc08_g16650	GSCOC_T00035631001	A0A068UUN2	Putative Stellacyanin	GO:0009055		-3.6080697670004	1.03286089541788e-05
Cc02_g39680	GSCOC_T00027682001	A0A068UJK9	Calcium-binding protein KIC	GO:0005509	AT2G46600	-3.60767866333456	9.50872400056757e-12
Cc07_g12980	GSCOC_T00036806001	A0A068TZN2	indeterminate(ID)-domain 14	GO:0009630	AT1G68130	-3.60625680010466	1.05519458209487e-10
Cc01_g17940	GSCOC_T00016262001	A0A068U669	Putative Probable leucine-rich repeat receptor-like protein kinase At1g35710	GO:0016021;GO:0005524;GO:0004672	AT4G08850	-3.60512052042841	0.00218685291309219
Cc11_g16260	GSCOC_T00038162001	A0A068UXM9	Putative Estradiol 17-beta-dehydrogenase 12	GO:0016021;GO:0016491	AT1G67730	-3.60443632273768	0.000228097863247792
Cc02_g07670	GSCOC_T00029906001	A0A068TUZ4	Expansin-A4	GO:0005618;GO:0005576;GO:0016020;GO:0009664	AT2G39700	-3.6036888956406	4.32066481626706e-12
Cc08_g02490	GSCOC_T00037725001	A0A068UZC5	Protein LOL1		AT1G32540	-3.60169351412265	2.85233683927138e-07
Cc00_g25680	GSCOC_T00001556001	A0A068VKL1	8-hydroxyquercetin 8-O-methyltransferase	GO:0008171		-3.60034028288873	1.51623450232571e-05
Cc07_g01140	GSCOC_T00019202001	A0A068V7X7	Putative CASP-like protein POPTRDRAFT_752786	GO:0016021;GO:0005886		-3.59991393080844	0.00133634279196419
Cc00_g08510	GSCOC_T00005634001	A0A068VHY4	Putative Cellulose synthase-like protein G2	GO:0016021;GO:0016760;GO:0071555;GO:0030244	AT4G24000	-3.59765541866937	5.32488652302067e-10
Cc02_g21030	GSCOC_T00014735001	A0A068TN63	Root phototropism protein 3		AT5G64330	-3.59333501953185	2.07354371284695e-14
Cc03_g14770	GSCOC_T00026712001	A0A068UHJ1	Hypothetical protein			-3.59270752566832	0.000852528528642581
Cc01_g06150	GSCOC_T00027453001	A0A068UJN5	Putative LRR receptor-like serine/threonine-protein kinase GSO1		AT1G71830	-3.59147228772803	2.35089219692458e-05
Cc00_g00590	GSCOC_T00036153001	A0A068UVT5	Putative Probable receptor-like protein kinase At5g39020	GO:0005524;GO:0004674	AT5G38280	-3.58931889839251	7.81206472481021e-06
Cc06_g18940	GSCOC_T00028933001	A0A068UPH1	Putative Strictosidine synthase 1	GO:0016844;GO:0009058	AT2G41290	-3.58816189061706	7.43278823537145e-07
Cc02_g21720	GSCOC_T00014817001	A0A068TQ25	Chlorophyll a-b binding protein CP24 10A, chloroplastic	GO:0009535;GO:0016021;GO:0009522;GO:0009523;GO:0016168;GO:0009765;GO:0018298	AT1G45474	-3.58358315627179	4.19871622943592e-09
Cc08_g13310	GSCOC_T00030358001	A0A068UQJ1	unknown protein; BEST Arabidopsis thaliana protein match is			-3.57832978246115	4.18573224958641e-11
Cc06_g00550	GSCOC_T00023236001	A0A068UDX0	Putative WEB family protein At2g38370		AT2G38370	-3.57062487869322	2.69814374079029e-07
Cc01_g14500	GSCOC_T00028449001	A0A068UNQ8	Protein CHUP1, chloroplastic			-3.5702458045433	0.00463299973541559
Cc01_g05390	GSCOC_T00027326001	A0A068UIX9	Putative Phospholipase C 2	GO:0009507;GO:0004629;GO:0048229;GO:0009395;GO:0048364	AT2G26870	-3.56938939876261	2.27184993396859e-21
Cc04_g10310	GSCOC_T00042577001	A0A068V572	non-specific phospholipase C6	GO:0009507;GO:0004629;GO:0048229;GO:0009395;GO:0048364		-3.56778624999076	0.00599843773104585
Cc09_g03020	GSCOC_T00017599001	A0A068U707	Ammonium transporter 1 member 2	GO:0016021;GO:0005886;GO:0008519;GO:0015843	AT1G64780	-3.56750753092716	0.00136363248253904
Cc06_g06270	GSCOC_T00031404001	A0A068UQV2	Putative Lysosomal Pro-X carboxypeptidase	GO:0008236		-3.56705681106034	1.08709035748559e-08
Cc02_g19710	GSCOC_T00014544001	A0A068TMP6	Family of unknown function (DUF566) _x0001_		AT1G49890	-3.56668476141	5.84135803385556e-07
Cc08_g04110	GSCOC_T00034217001	A0A068UU37	Putative disease resistance protein RGA1	GO:0043531;GO:0006952		-3.56329079841488	1.59230536568268e-06
Cc01_g01450	GSCOC_T00037907001	A0A068UX46	Putative UDP-glycosyltransferase 74F2	GO:0008194	AT2G43820	-3.56306098580167	7.65778729986657e-05
Cc09_g03760	GSCOC_T00017506001	A0A068U7G9	Serine carboxypeptidase-like 20	GO:0004185	AT4G12910	-3.55947542697066	0.00561200355206594
Cc05_g05300	GSCOC_T00035097001	A0A068UU57	Protein of unknown function (DUF1218)	GO:0016021		-3.55283376641524	0.00115021692605331
Cc08_g06540	GSCOC_T00036047001	A0A068UV83	Probable xyloglucan glycosyltransferase 5	GO:0016021	AT4G31590	-3.55136511544466	2.11861863525439e-05
Cc06_g22740	GSCOC_T00040675001	A0A068V387	Magnesium-protoporphyrin IX monomethyl ester [oxidative] cyclase, chloroplastic	GO:0048529;GO:0046872;GO:0015995;GO:0015979	AT3G56940	-3.54470905779809	2.24136970029008e-14
Cc03_g12870	GSCOC_T00030645001	A0A068UNE4	Calmodulin-like protein 5	GO:0005509	AT3G07490	-3.54033802006352	2.98556107167014e-05
Cc03_g01200	GSCOC_T00025725001	A0A068TRE9	Putative P-loop containing nucleoside triphosphate hydrolases superfamily protein	GO:0016021		-3.53991227449542	1.3261072695799e-10
Cc06_g06900	GSCOC_T00031327001	A0A068UQ54	Fasciclin-like arabinogalactan protein 17		AT5G06390	-3.53844969947901	1.16682174212828e-07
Cc01_g17620	GSCOC_T00016300001	A0A068U6L0	Receptor-like serine/threonine-protein kinase ALE2	GO:0016021;GO:0005886;GO:0005524;GO:0004674;GO:0042335;GO:1905393;GO:0046777;GO:0010068	AT2G20300	-3.5382511274606	8.2159874430392e-07
Cc00_g13310	GSCOC_T00009406001	A0A068VGB3	Putative Uncharacterized protein	GO:0046872;GO:0030001	AT5G19090	-3.53546437181888	0.000153874110850959
Cc02_g21800	GSCOC_T00014827001	A0A068TMK0	Aminotransferase ALD1	GO:0030170;GO:0008483;GO:0009058	AT2G13810	-3.53522545283778	0.00295718259544647
Cc09_g10590	GSCOC_T00041026001	A0A068V1X9	Putative Uncharacterized protein ycf39	GO:0016021	AT4G35250	-3.53419509383303	7.87037110705452e-12
Cc07_g16400	GSCOC_T00037566001	A0A068UWG5	Probable WRKY transcription factor 51	GO:0005634;GO:0003700;GO:0043565	AT5G64810	-3.53317601526757	6.04334010753971e-05
Cc02_g32290	GSCOC_T00012964001	A0A068VFA8	Putative unknown protein; Has 23 Blast hits to 23 proteins in 9 species			-3.53238591585619	5.30145198437652e-06
Cc02_g31040	GSCOC_T00023875001	A0A068UF73	Putative Lysosomal beta glucosidase	GO:0016021;GO:0004553;GO:0005975		-3.52906233695394	1.11600331964859e-07
Cc00_g28380	GSCOC_T00007303001	A0A068VLL9	Iron-sulfur assembly protein IscA-like 1, mitochondrial	GO:0051536;GO:0005198;GO:0097428	AT2G36260	-3.52801864534817	1.94305791704539e-11
Cc02_g00660	GSCOC_T00019856001	A0A068U9J4	UNC93-like protein 2	GO:0016021	AT1G18000	-3.52388674156976	1.30388147475521e-07
Cc08_g17120	GSCOC_T00035698001	A0A068UVE6	Probable aquaporin NIP5-1	GO:0016021;GO:0015267	AT4G10380	-3.52302396862782	0.000529362689120998
Cc00_g00060	GSCOC_T00036077001	A0A068UXW4	Cycloartenol synthase 2	GO:0005811;GO:0042300;GO:0000250;GO:0016104		-3.51837106682637	0.00520455225660308
Cc05_g04840	GSCOC_T00035020001	A0A068UTP9	Putative Septum-promoting GTP-binding protein 1	GO:0090404;GO:0005525;GO:0003924		-3.51399290891868	1.25179764596343e-07
Cc09_g10600	GSCOC_T00041025001	A0A068V3Q0	Hypothetical protein		AT4G35250	-3.5138277660554	1.83357155207731e-08
Cc08_g10660	GSCOC_T00027038001	A0A068UIB2	Putative FUNCTIONS IN	GO:0016021;GO:0005886	AT5G53730	-3.51206818162647	0.000162504758299805
Cc03_g04070	GSCOC_T00026114001	A0A068TUR5	Type I inositol 1,4,5-trisphosphate 5-phosphatase CVP2	GO:0046856	AT1G05470	-3.51118891163394	0.00076964512860842
Cc09_g06960	GSCOC_T00036341001	A0A068UWK7	Theobromine synthase 2	GO:0008168	AT3G11480	-3.50574349989481	6.90715579879882e-12
Cc11_g03400	GSCOC_T00025419001	A0A068UJV7	Putative Disease resistance protein RPM1	GO:0043531;GO:0006952		-3.5022302934055	0.000656529967375862
Cc00_g11350	GSCOC_T00007943001	A0A068VFS5	Beta-glucosidase 11	GO:0004553;GO:0005975	AT1G02850	-3.49994557008594	8.76239171297814e-07
Cc03_g02760	GSCOC_T00025944001	A0A068TSC4	Peptide methionine sulfoxide reductase B3, chloroplastic	GO:0046872;GO:0033743;GO:0030091;GO:0006979	AT4G21860	-3.49904066828552	7.48406272202777e-07
Cc09_g09090	GSCOC_T00023108001	A0A068UDH4	Putative Probable purine permease 10	GO:0016021;GO:0015211	AT4G18210	-3.49776915573291	6.1512491936601e-06
Cc07_g12310	GSCOC_T00036890001	A0A068U2C6	Diacylglycerol O-acyltransferase 2	GO:0016021;GO:0016747	AT3G51520	-3.49058842506845	6.28505904048666e-10
Cc09_g06610	GSCOC_T00005114001	A0A068VA82	Photosystem I reaction center subunit III, chloroplastic	GO:0009941;GO:0009535;GO:0009538;GO:0010287;GO:0019904;GO:0015979	AT1G31330	-3.48966393618729	3.12830016901742e-08
Cc11_g16970	GSCOC_T00038251001	A0A068UY50	Putative Uncharacterized GPI-anchored protein At1g27950	GO:0016021	AT1G27950	-3.48333310241411	5.14121276592687e-07
Cc06_g16710	GSCOC_T00004122001	A0A068VG20	Leucine-rich repeat receptor-like tyrosine-protein kinase At2g41820	GO:0016021;GO:0005524;GO:0004672	AT2G41820	-3.48315141940545	1.51870487236249e-09
Cc07_g02160	GSCOC_T00039398001	A0A068U0R6	Carbonic anhydrase, chloroplastic	GO:0004089;GO:0008270;GO:0015976	AT3G01500	-3.47497133462633	1.15331193254512e-05
Cc02_g15310	GSCOC_T00013975001	A0A068TLH7	Putative Probable LRR receptor-like serine/threonine-protein kinase At3g47570	GO:0016021;GO:0005524;GO:0004674		-3.47274717475118	0.00627468491036642
Cc04_g14900	GSCOC_T00040775001	A0A068V3D3	Putative Uncharacterized protein At5g01610		AT5G01610	-3.46890743678104	5.2815236061745e-06
Cc01_g15410	GSCOC_T00016563001	A0A068U652	Root phototropism protein 2	GO:0005737;GO:0005634;GO:0009638	AT2G30520	-3.46560344754101	1.58601879915489e-11
Cc11_g15340	GSCOC_T00038044001	A0A068V024	Putative Plant protein 1589 of unknown function			-3.46503895441185	4.03871653634082e-07
Cc05_g12550	GSCOC_T00021176001	A0A068UCE1	S-adenosyl-L-methionine-dependent methyltransferases superfamily protein	GO:0016021;GO:0008168		-3.46397175219791	2.23665175638353e-06
Cc00_g19010	GSCOC_T00001295001	A0A068VIT0	Chalcone and stilbene synthase family protein	GO:0016747;GO:0009058	AT5G13930	-3.46325461486022	4.08371797523747e-11
Cc10_g01870	GSCOC_T00024676001	A0A068UGK3	Filament-like plant protein 4		AT1G19835	-3.4631873619413	2.35130256380179e-15
Cc11_g11670	GSCOC_T00032416001	A0A068TWN0	Putative uncharacterized protein	GO:0016021		-3.46075704844666	6.32501182283881e-17
Cc01_g18690	GSCOC_T00016169001	A0A068U615	P-loop containing nucleoside triphosphate hydrolases superfamily protein	GO:0005524;GO:0016301		-3.4590927413042	3.48943520067258e-05
Cc04_g07490	GSCOC_T00022569001	A0A068TSZ5	Duplicated homeodomain-like superfamily protein	GO:0005634;GO:0003677	AT5G08520	-3.45557275930766	1.74941810089763e-13
Cc00_g27770	GSCOC_T00012253001	A0A068VLG5	Putative Probable leucine-rich repeat receptor-like protein kinase At1g35710	GO:0016021;GO:0005524;GO:0004672	AT1G35710	-3.44879710895947	0.000105806067562908
Cc06_g12720	GSCOC_T00041501001	A0A068U3E8	Putative GDSL esterase/lipase 5	GO:0016788	AT1G53920	-3.446302072984	2.00696707017905e-10
Cc04_g13580	GSCOC_T00018263001	A0A068V6V3	Putative Vegetative incompatibility protein HET-E-1			-3.44429555228065	1.48485613110891e-05
Cc03_g00700	GSCOC_T00025662001	A0A068TRA7	Putative Ca2 -binding protein 1	GO:0005829;GO:0005509;GO:0042538	AT5G49480	-3.4433916758637	7.76028049269504e-14
Cc03_g00020	GSCOC_T00025573001	A0A068TTQ0	Aspartic proteinase oryzasin-1	GO:0004190;GO:0006629	AT1G11910	-3.44172262464676	3.55485623849987e-13
Cc08_g01020	GSCOC_T00038438001	A0A068UYH9	alpha/beta-Hydrolases superfamily protein			-3.44158580608319	6.79364955642706e-06
Cc02_g05130	GSCOC_T00039013001	A0A068UZZ4	Probable inactive receptor kinase At5g58300	GO:0016021;GO:0005524;GO:0004672	AT5G58300	-3.43873051632828	5.34426032368629e-06
Cc06_g15000	GSCOC_T00030893001	A0A068UPM4	Putative DNA-3-methyladenine glycosylase 1	GO:0008725;GO:0006284		-3.43685781769609	1.99643630888255e-08
Cc00_g21850	GSCOC_T00013635001	A0A068VJR5	Putative UDP-glycosyltransferase 83A1	GO:0008194	AT3G02100	-3.43135667440343	0.000170282322019744
Cc01_g07620	GSCOC_T00009374001	A0A068VEG8	Hypothetical protein	GO:0016021	AT2G13820	-3.43101741355779	0.00017537898164885
Cc03_g05360	GSCOC_T00026285001	A0A068TT82	Putative Auxin-induced protein 5NG4	GO:0016021;GO:0022857		-3.42136922045379	2.08775154103094e-17
Cc01_g17810	GSCOC_T00016279001	A0A068U5G9	Putative Tetratricopeptide repeat (TPR)-like superfamily protein	GO:0006396		-3.41144638248681	7.79108985199832e-10
Cc07_g20620	GSCOC_T00007211001	A0A068VBI7	Putative Probable disease resistance protein At5g63020	GO:0043531		-3.40917849832862	0.00100034222523911
Cc06_g10460	GSCOC_T00041776001	A0A068U4P6	Putative Cytochrome b5	GO:0020037;GO:0046872	AT1G60660	-3.40631584469086	0.00171476176865178
Cc10_g01010	GSCOC_T00024564001	A0A068UFU0	High mobility group B protein 9	GO:0005634;GO:0003677	AT1G76110	-3.40611523488693	3.16879535019359e-05
Cc04_g03830	GSCOC_T00022092001	A0A068TQ05	alpha/beta-Hydrolases superfamily protein	GO:0016021		-3.40518018291577	2.98283958076198e-08
Cc07_g02790	GSCOC_T00039486001	A0A068U208	ABC transporter B family member 15	GO:0016021;GO:0005524;GO:0016887;GO:0042626	AT3G28345	-3.40254324999616	2.08012728855748e-05
Cc07_g06540	GSCOC_T00039965001	A0A068U311	Putative Exostosin family protein	GO:0016021;GO:0016757;GO:0006486	AT5G62220	-3.40026411658528	4.25232303794416e-09
Cc02_g04990	GSCOC_T00038996001	A0A068V1U7	Putative uncharacterized protein			-3.39456471759692	1.89301174996216e-06
Cc07_g05790	GSCOC_T00039860001	A0A068U2T1	Peptidyl-prolyl cis-trans isomerase CYP40	GO:0003755;GO:0006457	AT2G15790	-3.39247857737516	1.47678192234771e-06
Cc10_g13710	GSCOC_T00035247001	A0A068UTQ8	Protein kinase protein with adenine nucleotide alpha hydrolases-like domain	GO:0005524;GO:0004672	AT1G23540	-3.39014433315511	4.11198431207583e-12
Cc05_g10100	GSCOC_T00021500001	A0A068UD50	Probable glutathione S-transferase		AT1G78380	-3.38946527820541	0.000116697333726244
Cc06_g06140	GSCOC_T00031420001	A0A068UQS7	NAC domain-containing protein 90	GO:0005634;GO:0003677;GO:0006355	AT5G22380	-3.38444001745313	5.82381566789794e-05
Cc02_g12260	GSCOC_T00029307001	A0A068TTS7	Major facilitator superfamily protein	GO:0016021;GO:0005337	AT4G05120	-3.38403444626872	0.000352850729537926
Cc11_g05210	GSCOC_T00020462001	A0A068UCQ2	Glutamate decarboxylase 4	GO:0004351;GO:0030170;GO:0006536	AT2G02010	-3.38339645312791	5.42892820366526e-07
Cc02_g20030	GSCOC_T00014604001	A0A068TMX2	Putative phytosulfokine 4 precursor	GO:0005576;GO:0008083;GO:0008283	AT3G49780	-3.38303461027025	4.0931363341599e-06
Cc03_g12920	GSCOC_T00030637001	A0A068UND9	Serine/threonine-protein kinase-like protein ACR4	GO:0009986;GO:0030139;GO:0016021;GO:0005886;GO:0005524;GO:0042803;GO:0004672;GO:0009793;GO:0048439;GO:0010311;GO:0090627;GO:0046777;GO:0009786;GO:0048829	AT3G59420	-3.38201431593248	0.00341964584104431
Cc08_g02040	GSCOC_T00037665001	A0A068UZ76	Putative Disease resistance protein RPM1	GO:0043531;GO:0006952		-3.37935224076445	0.00125488882414922
Cc03_g03650	GSCOC_T00026060001	A0A068TS07	Primary amine oxidase	GO:0005507;GO:0008131;GO:0048038;GO:0009308	AT4G14940	-3.3785800261527	0.00477104923136918
Cc01_g13620	GSCOC_T00028335001	A0A068UKS0	Putative uncharacterized protein	GO:0016021;GO:0008270		-3.37694912463509	1.74397372849779e-10
Cc10_g08020	GSCOC_T00034451001	A0A068TYG8	Tubulin alpha-2 chain	GO:0005737;GO:0005874;GO:0005525;GO:0003924;GO:0005200;GO:0007017	AT4G14960	-3.37458214198808	1.13462786254076e-06
Cc01_g09120	GSCOC_T00023956001	A0A068UF44	Ferredoxin-3, chloroplastic	GO:0009507;GO:0051537;GO:0009055;GO:0046872	AT2G27510	-3.37294471332639	3.04236002676576e-13
Cc00_g00560	GSCOC_T00036146001	A0A068UY12	Putative uncharacterized protein	GO:0016021;GO:0005524;GO:0004672		-3.37289196509305	0.00257488847266097
Cc01_g04060	GSCOC_T00039270001	A0A068V0P3	Linoleate 13S-lipoxygenase 2-1, chloroplastic	GO:0046872;GO:0016702;GO:0031408	AT3G45140	-3.37062050309136	4.90565676716846e-05
Cc10_g03570	GSCOC_T00024886001	A0A068UH47	Allene oxide synthase, chloroplastic	GO:0020037;GO:0005506;GO:0004497;GO:0016705	AT5G42650	-3.36798424136961	1.91754358311103e-09
Cc06_g09650	GSCOC_T00041886001	A0A068U6U2	ATP binding microtubule motor family protein	GO:0005874;GO:0005524;GO:0008017;GO:0003777;GO:0007018	AT3G16060	-3.36261647850629	2.33315360203212e-07
Cc03_g04140	GSCOC_T00026123001	A0A068TS17	Putative Kinase interacting (KIP1-like) family protein	GO:0003779	AT3G22790	-3.36139030690649	2.01279124331317e-16
Cc09_g00470	GSCOC_T00017946001	A0A068U7M7	Hypothetical protein			-3.36009423133281	1.89719261540574e-09
Cc07_g07780	GSCOC_T00040138001	A0A068U504	Auxin-responsive protein IAA9	GO:0005634;GO:0009734;GO:0006355	AT5G65670	-3.35997402591281	5.66554008615361e-06
Cc09_g01490	GSCOC_T00017801001	A0A068U890	Aminomethyltransferase, mitochondrial	GO:0005739;GO:0004047;GO:0008483;GO:0006546	AT1G11860	-3.35956141664675	8.02033321532807e-10
Cc10_g07700	GSCOC_T00034489001	A0A068TXL9	Putative Transcription factor bHLH74	GO:0006355	AT5G50915	-3.35789890809077	3.21754268710508e-07
Cc06_g04650	GSCOC_T00042980001	A0A068V603	Putative UDP-glycosyltransferase 73C1	GO:0008194	AT2G36750	-3.3556366034459	8.09299415919781e-15
Cc06_g13090	GSCOC_T00041448001	A0A068U4B2	Peroxidase 16	GO:0005576;GO:0020037;GO:0046872;GO:0004601;GO:0042744;GO:0006979	AT2G18980	-3.35498276493776	1.0040383507037e-14
Cc06_g21140	GSCOC_T00034072001	A0A068UTU1	Tropinone reductase homolog	GO:0016491		-3.35116871215812	0.00611032242705582
Cc06_g17100	GSCOC_T00012653001	A0A068VF99	Putative Magnesium-chelatase subunit H	GO:0016851;GO:0015995	AT5G13630	-3.34909908222921	9.3178813472182e-13
Cc02_g34690	GSCOC_T00000730001	A0A068V9T2	Putative uncharacterized protein	GO:0005516	AT4G25800	-3.34757268217888	3.30809553252517e-06
Cc01_g16680	GSCOC_T00016412001	A0A068U8G8	Putative Predicted protein	GO:0016021;GO:0005886		-3.34407124399874	0.00110174566251497
Cc07_g08290	GSCOC_T00040198001	A0A068U3K6	unknown protein; FUNCTIONS IN			-3.34339207772299	5.70023752908904e-05
Cc00_g22090	GSCOC_T00011254001	A0A068VMD2	Putative Disease resistance protein At4g27190	GO:0043531		-3.33876530141859	6.74031352469579e-08
Cc02_g18220	GSCOC_T00014359001	A0A068TP31	cytochrome b6f complex subunit (petM), putative	GO:0009535;GO:0009512;GO:0016021;GO:0019904		-3.33777853212655	1.39262118982551e-07
Cc08_g06890	GSCOC_T00025236001	A0A068UGY9	Putative Cytosolic sulfotransferase 15	GO:0008146	AT5G07010	-3.33150985703317	4.33452683797692e-10
Cc02_g36580	GSCOC_T00003906001	A0A068VAE9	Putative Probable calcium-binding protein CML10	GO:0005509	AT1G24620	-3.32930982000707	0.000353544158328283
Cc01_g15310	GSCOC_T00016578001	A0A068U663	RING-H2 finger protein ATL73	GO:0016021	AT5G05280	-3.32674894351845	0.000159026072325406
Cc11_g02530	GSCOC_T00018513001	A0A068V761	Acidic endochitinase	GO:0004553;GO:0005975	AT5G24090	-3.32372028982026	4.04561475266059e-10
Cc08_g10500	GSCOC_T00027018001	A0A068UJ77	Putative uncharacterized protein	GO:0005634;GO:0003677;GO:0008270	AT5G47390	-3.32296857978653	2.77924536736809e-09
Cc00_g11980	GSCOC_T00010413001	A0A068VG10	Putative Probable LRR receptor-like serine/threonine-protein kinase At4g08850	GO:0016021;GO:0005524;GO:0004672	AT4G08850	-3.32013141441457	2.37532671640212e-05
Cc01_g10770	GSCOC_T00024183001	A0A068UFM1	Putative Cysteine proteinases superfamily protein		AT5G04250	-3.31880139817846	1.30193315364957e-05
Cc00_g23530	GSCOC_T00009087001	A0A068VK77	Serine carboxypeptidase-like 13	GO:0004185	AT1G73310	-3.31092014813799	2.77863417592478e-09
Cc00_g11830	GSCOC_T00007748001	A0A068VGP8	Putative Octicosapeptide/Phox/Bem1p family protein	GO:0004674;GO:0046777		-3.30981058417973	6.43565295153093e-14
Cc07_g16410	GSCOC_T00037565001	A0A068UX98	Ras-related protein Rab7	GO:0005525;GO:0003924	AT1G22740	-3.30955892011953	9.53157406439244e-05
Cc09_g09500	GSCOC_T00003714001	A0A068VEI6	Chlorophyll a-b binding protein 36, chloroplastic	GO:0009535;GO:0016021;GO:0009522;GO:0009523;GO:0016168;GO:0009765;GO:0018298	AT2G05100	-3.30633532032262	2.92828510654626e-07
Cc02_g18060	GSCOC_T00014339001	A0A068TMA0	Cysteine/Histidine-rich C1 domain family protein	GO:0035556	AT1G60420	-3.30117667875217	3.4007517297417e-07
Cc07_g09050	GSCOC_T00040299001	A0A068U2N0	Putative Transcription factor AS1	GO:0003677	AT2G37630	-3.29810005997345	0.00118921740508832
Cc09_g01020	GSCOC_T00017869001	A0A068U7H0	Putative Uncharacterized membrane protein At1g16860	GO:0016021	AT1G16860	-3.29748718845699	4.58038935193793e-10
Cc08_g07730	GSCOC_T00011861001	A0A068VAW1	Hypothetical protein			-3.28585560116043	1.97563516912147e-09
Cc00_g24050	GSCOC_T00009221001	A0A068VK27	Putative Dehydration-responsive protein RD22		AT5G25610	-3.28579655921129	1.37731382030269e-08
Cc00_g14180	GSCOC_T00009212001	A0A068VGY3	Cytochrome P450 85A1	GO:0020037;GO:0005506;GO:0004497;GO:0016705	AT3G30180	-3.28439498697779	5.04912991838002e-06
Cc06_g13600	GSCOC_T00041373001	A0A068U5P9	Putative Pathogenesis-related protein PRMS	GO:0005576	AT2G14610	-3.28416307751273	6.17949598228506e-06
Cc09_g00860	GSCOC_T00017891001	A0A068U834	Rho GDP-dissociation inhibitor 1	GO:0005737;GO:0005094	AT3G07880	-3.28113062975974	3.99230342846692e-09
Cc00_g22710	GSCOC_T00002421001	A0A068VMK3	Putative Protein of unknown function (DUF581)		AT2G25690	-3.27313316041758	3.45618271528128e-10
Cc07_g08570	GSCOC_T00040236001	A0A068U392	Non-specific lipid-transfer protein 2	GO:0006869		-3.2684283621132	6.550812498368e-07
Cc07_g15490	GSCOC_T00036469001	A0A068TYP8	Putative G-type lectin S-receptor-like serine/threonine-protein kinase RLK1	GO:0016021;GO:0005524;GO:0004674;GO:0048544	AT1G34300	-3.26825509271419	0.000109723427528406
Cc02_g13180	GSCOC_T00029189001	A0A068TUB9	Putative Tetraspanin family protein	GO:0016021		-3.26186736348195	4.10534305982056e-13
Cc05_g08810	GSCOC_T00016913001	A0A068V5B0	Putative Secologanin synthase	GO:0020037;GO:0005506;GO:0016705		-3.26111606993172	0.0062191549743961
Cc00_g25060	GSCOC_T00002589001	A0A068VKD7	Putative Beta-hexosaminidase subunit B2	GO:0004563;GO:0102148;GO:0005975	AT1G65590	-3.25963348652124	1.3288762344656e-14
Cc03_g00600	GSCOC_T00025645001	A0A068TR99	Putative Plant invertase/pectin methylesterase inhibitor superfamily protein	GO:0004857	AT1G47960	-3.25782433045275	1.4232999986844e-07
Cc08_g06750	GSCOC_T00005866001	A0A068VGP2	Putative Protein ASPARTIC PROTEASE IN GUARD CELL 2	GO:0004190		-3.25519932917144	1.46575282444643e-05
Cc02_g35750	GSCOC_T00042800001	A0A068V3T2	Probable receptor-like protein kinase At2g42960	GO:0016021;GO:0005524;GO:0004672	AT5G18500	-3.25249179043372	2.08012728855748e-05
Cc10_g16360	GSCOC_T00011268001	A0A068VKC8	Hypothetical protein			-3.25205893538366	9.30131014093709e-08
Cc00_g24720	GSCOC_T00004719001	P42884	Monomethylxanthine methyltransferase 1	GO:0008168;GO:0032259		-3.24962601733232	4.43800588292296e-13
Cc06_g15930	GSCOC_T00030756001	A0A068UPG8	Putative Flavonol 3-sulfotransferase	GO:0008146	AT1G18590	-3.24820703005635	0.000118725385353521
Cc10_g04880	GSCOC_T00034882001	A0A068U105	Protein of unknown function (DUF3223)	GO:0009507	AT1G45230	-3.24511032195253	3.32934511499247e-07
Cc07_g04690	GSCOC_T00039726001	A0A068U2F7	Hypothetical protein			-3.24387095762949	1.18899516635306e-13
Cc02_g29650	GSCOC_T00009344001	A0A068V9V8	Putative Aspartic proteinase nepenthesin-2	GO:0004190	AT1G09750	-3.24261862221349	0.000186778553293516
Cc05_g04270	GSCOC_T00031641001	A0A068UQT7	Hypothetical protein			-3.23778325621971	1.28827327569651e-05
Cc00_g35810	GSCOC_T00011675001	A0A068VNK3	Putative Cytochrome P450 86B1	GO:0016021;GO:0020037;GO:0005506;GO:0016705	AT1G57750	-3.23716832507339	0.00466345853714128
Cc04_g11200	GSCOC_T00037284001	A0A068UWQ4	Cytochrome P450 71A1	GO:0020037;GO:0005506;GO:0004497;GO:0016705	AT3G26310	-3.23479937644699	1.06820267249996e-06
Cc01_g13590	GSCOC_T00028331001	A0A068ULF6	Putative Protein of unknown function (DUF3527)			-3.23245038718793	2.01279124331317e-16
Cc07_g14270	GSCOC_T00036634001	A0A068TZQ5	unknown protein; FUNCTIONS IN			-3.22309058919749	0.00396635491476366
Cc11_g06940	GSCOC_T00020732001	A0A068UAS7	RNA-dependent RNA polymerase 1	GO:0003723;GO:0003968;GO:0031047	AT1G14790	-3.21854510107583	1.31272179622474e-08
Cc02_g17620	GSCOC_T00014282001	A0A068TNW7	Glucan endo-1,3-beta-glucosidase 7	GO:0004553;GO:0005975	AT4G34480	-3.21584046079288	1.36295777321912e-06
Cc00_g29860	GSCOC_T00006999001	A0A068VM26	unknown protein; BEST Arabidopsis thaliana protein match is			-3.21573759174651	8.47088073391048e-05
Cc05_g05650	GSCOC_T00035140001	A0A068UU89	Calcium-binding protein PBP1	GO:0005509	AT5G54490	-3.21018370585952	1.18315328447619e-08
Cc00_g25410	GSCOC_T00007756001	A0A068VKT2	Putative Protein of unknown function (DUF674)			-3.20562012452018	0.000687152115306369
Cc00_g22430	GSCOC_T00010091001	A0A068VJ74	Hypothetical protein			-3.20456554927348	0.000606653072150658
Cc02_g37110	GSCOC_T00028036001	A0A068UMQ4	SPX domain-containing membrane protein At4g22990	GO:0016021;GO:0022857	AT4G11810	-3.20368744509138	0.00129120566449564
Cc09_g01830	GSCOC_T00017758001	A0A068U768	unknown protein; FUNCTIONS IN	GO:0046872		-3.20335110173359	0.00552031463290558
Cc09_g03330	GSCOC_T00017563001	A0A068U6T4	Dynamin-related protein 4C	GO:0005525;GO:0003924	AT1G60500	-3.20099856303913	0.000293342386366845
Cc10_g12130	GSCOC_T00031902001	A0A068URN8	Putative Probable signal recognition particle 43 kDa protein, chloroplastic	GO:0009507;GO:0080085;GO:0045038;GO:0009416	AT2G47450	-3.19928298338927	4.62342410763543e-11
Cc06_g13870	GSCOC_T00041336001	A0A068U328	Putative unknown protein; FUNCTIONS IN	GO:0016021		-3.19572413664697	9.28075597059847e-12
Cc10_g03880	GSCOC_T00024929001	A0A068UJ15	Protein of unknown function, DUF617	GO:0010274	AT2G41660	-3.19476989478504	0.00396635491476366
Cc07_g08740	GSCOC_T00040262001	A0A068U3N6	Putative unknown protein; FUNCTIONS IN			-3.19445028468082	0.000178794208802774
Cc07_g07960	GSCOC_T00040158001	A0A068U2I8	Putative uncharacterized protein			-3.18905529553755	8.02181053740014e-14
Cc08_g13270	GSCOC_T00030363001	A0A068UNJ6	unknown protein; INVOLVED IN		AT5G12900	-3.1888406225667	3.71615896103363e-08
Cc03_g10650	GSCOC_T00004060001	A0A068VHZ6	Putative Probable LRR receptor-like serine/threonine-protein kinase At4g08850	GO:0016021;GO:0005524;GO:0004672		-3.18517852736463	0.00996311812143009
Cc05_g04790	GSCOC_T00035015001	A0A068UTP5	Protein TRANSPARENT TESTA 12	GO:0016021;GO:0015297;GO:0042910		-3.18313282404005	0.00407310792829357
Cc08_g12320	GSCOC_T00030499001	A0A068UNT2	Putative DUF246 domain-containing protein At1g04910	GO:0005768;GO:0016021;GO:0005802;GO:0016757;GO:0006004	AT4G16650	-3.182205719004	0.00347430991079929
Cc11_g12840	GSCOC_T00032259001	A0A068TVN9	Mitochondrial transcription termination factor family protein	GO:0003690;GO:0006355	AT2G03050	-3.18041778848617	4.8388185395874e-07
Cc00_g22120	GSCOC_T00009092001	A0A068VJR7	Putative MLP-like protein 28	GO:0006952		-3.18020985749557	2.30689029607691e-09
Cc05_g13120	GSCOC_T00021103001	A0A068UC14	zinc finger protein-related			-3.17412466831749	5.11093777907388e-07
Cc02_g07100	GSCOC_T00009472001	A0A068VGA5	Uncharacterized protein	GO:0016021;GO:0008270		-3.17340527664306	2.084756204316e-08
Cc02_g09420	GSCOC_T00029657001	A0A068TUF7	INVOLVED IN	GO:0009522;GO:0015979		-3.17057557451426	0.000127657694624117
Cc00_g32030	GSCOC_T00008801001	A0A068VQ62	Chalcone and stilbene synthase family protein	GO:0016747;GO:0009058	AT5G13930	-3.16535592550925	6.74493039160083e-10
Cc01_g08980	GSCOC_T00023938001	A0A068UGX5	Late embryogenesis abundant (LEA) hydroxyproline-rich glycoprotein family	GO:0009269		-3.16439321553987	8.92498581878419e-05
Cc06_g19980	GSCOC_T00022889001	A0A068UD92	Putative Endoribonuclease Dicer homolog 2	GO:0004525;GO:0006396	AT3G03300	-3.15974712554894	4.31882191361492e-12
Cc03_g06240	GSCOC_T00026414001	A0A068TSN9	Putative Protein of unknown function (DUF3527)			-3.1568540722208	2.63439287924169e-07
Cc10_g03380	GSCOC_T00024862001	A0A068UIW2	Probable 1-acyl-sn-glycerol-3-phosphate acyltransferase 4	GO:0016021;GO:0016746		-3.15578490483249	0.0084072984806024
Cc02_g24700	GSCOC_T00028852001	A0A068UPB5	Putative Zinc finger protein ZAT9		AT3G60580	-3.15467759991197	0.00347474143280437
Cc07_g13320	GSCOC_T00036758001	A0A068U023	Cysteine-rich repeat secretory protein 60	GO:0016021	AT5G37660	-3.1540257669953	3.11321142610832e-05
Cc08_g07750	GSCOC_T00011866001	A0A068VDV8	Hypothetical protein			-3.15257891909709	0.00587505161424445
Cc00_g26370	GSCOC_T00002364001	A0A068VNK5	Putative amidase C869.01		AT4G34880	-3.15030461869459	0.00224299538504411
Cc04_g10900	GSCOC_T00042667001	A0A068V3F8	Putative CONTAINS InterPro DOMAIN/s	GO:0010088	AT3G01680	-3.1461736396947	0.000253481461033823
Cc06_g05820	GSCOC_T00043149001	A0A068V3P5	Putative unknown protein; BEST Arabidopsis thaliana protein match is			-3.13958824323878	0.00242142758747177
Cc04_g13030	GSCOC_T00011367001	A0A068V8W3	Putative unknown protein; FUNCTIONS IN			-3.13796481148775	2.54545881390891e-07
Cc05_g15330	GSCOC_T00038705001	A0A068V1F5	Peptidyl-prolyl cis-trans isomerase FKBP16-1, chloroplastic	GO:0003755	AT4G26555	-3.13732427861718	7.84626370427226e-06
Cc00_g30920	GSCOC_T00002387001	A0A068VM40	unknown protein; FUNCTIONS IN	GO:0016021		-3.13723726207397	0.000196255126911562
Cc11_g08640	GSCOC_T00032846001	A0A068TWV5	Uncharacterized protein	GO:0004185	AT1G15000	-3.1370602269409	0.00936444923662407
Cc06_g03680	GSCOC_T00023657001	A0A068UEQ0	Putative uncharacterized protein			-3.13600186266661	1.34745963629949e-07
Cc08_g02990	GSCOC_T00037803001	A0A068UZH7	Putative Bifunctional dihydroflavonol 4-reductase/flavanone 4-reductase			-3.134568585649	3.56009417147034e-10
Cc08_g13560	GSCOC_T00030330001	A0A068UQH2	Guard cell S-type anion channel SLAC1	GO:0016021;GO:0008308;GO:0006873	AT1G12480	-3.13107906303034	7.62343419419533e-07
Cc04_g02320	GSCOC_T00021901001	A0A068TNX2	Putative Predicted protein	GO:2000028	AT2G25930	-3.13085431970634	7.0117704541448e-06
Cc10_g04260	GSCOC_T00034956001	A0A068TYI2	Putative BRI1 kinase inhibitor 1	GO:0005886;GO:0019210	AT5G42750	-3.13026454655273	4.86080478920054e-08
Cc04_g01440	GSCOC_T00021795001	A0A068TR66	Putative unknown protein; BEST Arabidopsis thaliana protein match is	GO:0009734	AT1G54200	-3.13018251683424	2.36102173399979e-06
Cc02_g26240	GSCOC_T00028635001	A0A068UM57	Putative RING-H2 finger protein ATL52	GO:0016021	AT3G03550	-3.12929567215313	0.000824159741144826
Cc06_g18920	GSCOC_T00028931001	A0A068UM38	Two-component response regulator ARR9	GO:0000160	AT3G57040	-3.12888986849424	2.28817514690543e-06
Cc02_g22650	GSCOC_T00014942001	A0A068TMT4	Probable receptor-like protein kinase At1g11050	GO:0016021;GO:0005524;GO:0004672	AT1G11050	-3.12757002530118	0.000336491923982229
Cc11_g11660	GSCOC_T00032417001	A0A068TYN6	Putative uncharacterized protein	GO:0016021		-3.12697112266843	5.49836936135699e-06
Cc00_g29330	GSCOC_T00011480001	A0A068VLE5	Putative Predicted protein			-3.12414220299722	7.52411263311248e-07
Cc01_g02540	GSCOC_T00009688001	A0A068V9C0	Amino acid permease family protein	GO:0016021;GO:0015203	AT3G13620	-3.12186941843491	0.000473845725996947
Cc02_g05410	GSCOC_T00039049001	A0A068UZE2	Transcription factor RF2b	GO:0003700	AT2G40620	-3.12169549246155	0.000612050266628932
Cc04_g02760	GSCOC_T00021957001	A0A068TNT2	Ethylene-responsive transcription factor TINY	GO:0005634;GO:0003677;GO:0003700		-3.11935387359802	0.00833940085051859
Cc05_g10400	GSCOC_T00021451001	A0A068UD19	Putative Heme-binding protein 2			-3.11291982228377	3.11216284950675e-08
Cc00_g18980	GSCOC_T00003157001	A0A068VIG3	Putative Probable receptor-like protein kinase At5g39020	GO:0005524;GO:0004674	AT5G38280	-3.10771445138952	7.10324584578324e-06
Cc06_g04540	GSCOC_T00042966001	A0A068V406	Ras-related protein RABE1a	GO:0005525;GO:0003924	AT3G53610	-3.0971495749303	0.0041448304044706
Cc05_g06080	GSCOC_T00009858001	A0A068VHP4	Putative late blight resistance protein homolog R1A-6	GO:0043531		-3.09620438175444	4.71904024401517e-10
Cc07_g00480	GSCOC_T00019120001	A0A068V792	Mitochondrial ribosomal protein L37			-3.09605126569271	3.21551088935809e-09
Cc06_g06460	GSCOC_T00031380001	A0A068UPZ6	NDR1/HIN1-like 1	GO:0016021	AT3G11660	-3.09046165022834	5.53369087783859e-18
Cc01_g14550	GSCOC_T00028457001	A0A068UNR0	Putative BAG family molecular chaperone regulator 4	GO:0051087	AT3G51780	-3.08995976833598	4.07735564562827e-07
Cc10_g04620	GSCOC_T00034914001	A0A068TZF8	Probable serine/threonine-protein kinase At1g01540	GO:0016021;GO:0005524;GO:0004672	AT1G01540	-3.08972167876236	3.05583467519145e-10
Cc08_g01290	GSCOC_T00038406001	A0A068UYX5	Thermospermine synthase ACAULIS5	GO:0016740;GO:0006596	AT5G19530	-3.08882614778058	0.000137948046361668
Cc06_g20650	GSCOC_T00023014001	A0A068UDK8	Putative Polynucleotidyl transferase, ribonuclease H-like superfamily protein	GO:0008408;GO:0003676		-3.08755675018005	2.52014092731246e-05
Cc02_g25580	GSCOC_T00028731001	A0A068ULH1	E3 ubiquitin-protein ligase ATL4	GO:0016021	AT3G60220	-3.08626604672356	0.00388628841967373
Cc09_g06970	GSCOC_T00036338001	Q9AVK0	7-methylxanthosine synthase 1	GO:0046872;GO:0008168;GO:0009820;GO:0032259	AT3G11480	-3.08451396695378	1.59291894060086e-18
Cc06_g23550	GSCOC_T00040554001	A0A068V141	Organic cation/carnitine transporter 7	GO:0016021;GO:0022857	AT3G13050	-3.07622706037018	1.40282539437728e-12
Cc01_g16990	GSCOC_T00016376001	A0A068U6E2	Probable LRR receptor-like serine/threonine-protein kinase At5g48740	GO:0016021;GO:0005524;GO:0004672	AT5G48740	-3.0751574448912	0.00088553695492918
Cc05_g00060	GSCOC_T00017022001	A0A068V5H2	Scarecrow-like protein 23		AT5G41920	-3.07368132921062	4.21018593795814e-14
Cc04_g16540	GSCOC_T00035759001	A0A068UVH7	Putative uncharacterized protein			-3.07179776564764	5.46945753536441e-06
Cc00_g26730	GSCOC_T00003169001	A0A068VL68	Anthocyanidin 5,3-O-glucosyltransferase	GO:0008194	AT3G16520	-3.07086119115414	9.59927464230473e-07
Cc00_g17490	GSCOC_T00008151001	A0A068VHZ0	Protein ASPARTIC PROTEASE IN GUARD CELL 1	GO:0004190	AT3G18490	-3.06800159267447	2.49202439298461e-07
Cc04_g13490	GSCOC_T00018274001	A0A068V6K4	G-type lectin S-receptor-like serine/threonine-protein kinase At4g03230	GO:0016021;GO:0005524;GO:0030247;GO:0004674;GO:0048544	AT4G21390	-3.06645752787514	1.46136273775738e-05
Cc05_g08800	GSCOC_T00016912001	A0A068V622	Secologanin synthase	GO:0016021;GO:0020037;GO:0005506;GO:0004497;GO:0016705	AT3G14690	-3.06545358989127	0.00612676018211339
Cc05_g15540	GSCOC_T00038678001	A0A068UZD8	Probable amino acid permease 7	GO:0016021	AT5G23810	-3.0652133063676	4.63773109009122e-06
Cc06_g01460	GSCOC_T00023365001	A0A068UD55	Chlorophyll a-b binding protein CP29.2, chloroplastic	GO:0009535;GO:0016021;GO:0009522;GO:0009523;GO:0016168;GO:0009765;GO:0018298	AT3G08940	-3.06137323005475	1.64692777063357e-06
Cc05_g09110	GSCOC_T00002670001	A0A068VGE5	Putative Predicted protein	GO:0016021;GO:0035556		-3.0602384364341	3.33466651362521e-05
Cc03_g05620	GSCOC_T00026324001	A0A068TV89	Protein of unknown function (DUF640)	GO:0005634;GO:0090698		-3.05972590038182	0.00340190297325119
Cc01_g12020	GSCOC_T00028122001	A0A068UK96	Chitinase 2	GO:0004553;GO:0005975		-3.05718830481577	1.33851576106134e-08
Cc04_g14640	GSCOC_T00040722001	A0A068V1D0	L-type lectin-domain containing receptor kinase IV.2	GO:0016021;GO:0005524;GO:0030246;GO:0004672	AT3G53810	-3.05108474063435	1.69609105402884e-07
Cc04_g05760	GSCOC_T00022342001	A0A068TPQ9	Uncharacterized protein At4g14100		AT4G14100	-3.04861478389319	5.94454893142476e-05
Cc06_g10350	GSCOC_T00041790001	A0A068U6N7	Putative Probable RNA-dependent RNA polymerase 5	GO:0003723;GO:0003968;GO:0031047	AT2G19930	-3.04768259568404	0.000976368328247671
Cc05_g08560	GSCOC_T00016880001	A0A068V587	Brassinosteroid-regulated protein BRU1	GO:0048046;GO:0005618;GO:0004553;GO:0016762;GO:0042546;GO:0071555;GO:0010411	AT4G14130	-3.04578161627893	0.00423303004980597
Cc01_g11650	GSCOC_T00028070001	A0A068UMT3	Putative Interactor of constitutive active ROPs 3		AT5G60210	-3.04209802280694	5.28003515362273e-05
Cc00_g20770	GSCOC_T00008849001	A0A068VIU9	Caffeic acid 3-O-methyltransferase	GO:0008171;GO:0046983;GO:0032259	AT5G54160	-3.04099648217776	2.53834774053092e-06
Cc02_g39070	GSCOC_T00027768001	A0A068UKB6	Putative Protein of unknown function (DUF3133)	GO:1900150	AT5G05190	-3.04061316464352	0.000156027486454639
Cc08_g10680	GSCOC_T00027041001	A0A068UJ19	Putative Fatty acid desaturase 1	GO:0016021;GO:0016491;GO:0006629	AT2G46210	-3.03136982968864	4.01330260542558e-12
Cc02_g23810	GSCOC_T00015084001	A0A068TNX5	NAC domain containing protein 35	GO:0005634;GO:0003677;GO:0006355	AT2G02450	-3.02958325007625	0.000708704272078866
Cc00_g18490	GSCOC_T00005333001	A0A068VIA7	Codeine O-demethylase	GO:0016491	AT1G17020	-3.02747301729144	1.60454394422589e-07
Cc08_g03920	GSCOC_T00034191001	A0A068UT88	Putative Cytochrome P450 76C4	GO:0020037;GO:0005506;GO:0004497;GO:0016705	AT2G45550	-3.02667761000469	4.61227816689539e-05
Cc07_g04120	GSCOC_T00039663001	A0A068U1X7	Predicted protein	GO:0046983	AT3G58850	-3.02334212129813	0.00217026353907359
Cc04_g15550	GSCOC_T00042327001	A0A068V4Q9	Protein of unknown function (DUF1118)	GO:0016021		-3.02280803237343	3.78093576844381e-07
Cc10_g03950	GSCOC_T00034996001	A0A068TYP7	Protein of unknown function, DUF547			-3.01997777403417	7.02597601797494e-10
Cc07_g09500	GSCOC_T00037231001	A0A068U1H6	Putative Phosphatidylinositol transfer protein PDR16			-3.01964440777768	3.93261907783203e-10
Cc07_g15380	GSCOC_T00036482001	A0A068TYT9	Probable trehalose-phosphate phosphatase J	GO:0004805;GO:0005992	AT5G65140	-3.01864317094453	3.29717874388828e-13
Cc03_g02320	GSCOC_T00025874001	A0A068TU85	NAD(P)-binding Rossmann-fold superfamily protein		AT5G18660	-3.01587744929461	2.93123524004432e-09
Cc03_g10610	GSCOC_T00004053001	A0A068VFG3	Putative Probable LRR receptor-like serine/threonine-protein kinase At4g08850	GO:0005524;GO:0004672		-3.0141300788031	0.0072416858245524
Cc06_g06890	GSCOC_T00031328001	A0A068UQI4	Putative Uncharacterized protein		AT2G35880	-3.01224636272622	7.29169844425424e-06
Cc07_g03750	GSCOC_T00039620001	A0A068U167	Lamin-like protein	GO:0009055	AT5G15350	-3.01101552535174	0.00992998146764152
Cc02_g02580	GSCOC_T00020116001	A0A068UAE6	BAHD acyltransferase DCR	GO:0005737;GO:0016747;GO:0010143;GO:0051179;GO:0010090	AT5G23940	-3.0088593969065	2.20711601426209e-07
Cc02_g31950	GSCOC_T00027468001	A0A068UJ73	Putative UDP-glycosyltransferase 83A1	GO:0008194	AT3G02100	-3.00658384441844	0.000200772782362871
Cc11_g15590	GSCOC_T00038076001	A0A068V041	Putative unknown protein; BEST Arabidopsis thaliana protein match is	GO:0032875	AT5G40460	-3.00490499963229	2.11004037133067e-08
Cc11_g16910	GSCOC_T00038243001	A0A068UXS4	Chlorophyll a-b binding protein, chloroplastic	GO:0009535;GO:0016021;GO:0009522;GO:0009523;GO:0016168;GO:0009765;GO:0018298	AT3G61470	-3.00390371756317	1.48709505612962e-06
Cc02_g26750	GSCOC_T00024978001	A0A068UGG8	Plant protein of unknown function (DUF946)			-3.00036655316622	5.40469450309943e-06
Cc00_g12110	GSCOC_T00002210001	A0A068VJA8	Protein of unknown function (DUF1118)	GO:0009535;GO:0009515;GO:0016021;GO:0090391;GO:0010196;GO:0045893;GO:0080167;GO:0010027		-2.99999154457437	8.4161611168404e-08
Cc08_g07270	GSCOC_T00025342001	A0A068UJR3	Probable LRR receptor-like serine/threonine-protein kinase At1g14390	GO:0016021;GO:0005524;GO:0004672	AT2G02780	-2.9995115690993	0.000728782460930236
Cc11_g09040	GSCOC_T00032795001	A0A068TWS8	unknown protein; FUNCTIONS IN	GO:0016021		-2.99685544605991	1.44872168351571e-06
Cc05_g06040	GSCOC_T00035208001	A0A068UTZ3	Heat shock 70 kDa protein 4	GO:0005524	AT3G12580	-2.99547522440374	3.46423557058453e-05
Cc10_g00910	GSCOC_T00024551001	A0A068UFT0	L-ascorbate oxidase homolog	GO:0005507;GO:0016491	AT4G12420	-2.99458462781496	0.00024531413383834
Cc00_g02580	GSCOC_T00001684001	A0A068VAX2	Putative Glucan endo-1,3-beta-glucosidase-like protein 3		AT1G18650	-2.98931685959541	6.94383501892571e-06
Cc00_g00310	GSCOC_T00036111001	A0A068UXY9	Putative Probable protein phosphatase 2C 43	GO:0043169;GO:0004722	AT5G06750	-2.98875471255417	0.00198921536278563
Cc04_g07230	GSCOC_T00022533001	A0A068TQX3	Putative uncharacterized protein	GO:0046872;GO:0030001		-2.98773312471024	7.45227808512695e-05
Cc00_g11970	GSCOC_T00010411001	A0A068VGR0	Putative Probable LRR receptor-like serine/threonine-protein kinase At4g08850	GO:0016021;GO:0005524;GO:0004672	AT4G08850	-2.98468496726515	0.000612281757731052
Cc04_g05930	GSCOC_T00022367001	A0A068TQK9	Serine carboxypeptidase-like 45	GO:0004185	AT1G28110	-2.9839953979366	0.003265086759237
Cc07_g11750	GSCOC_T00036964001	A0A068U0V7	Undecaprenyl diphosphate synthase, putative	GO:0016765	AT2G17570	-2.97961048018998	3.97535871473299e-07
Cc05_g00040	GSCOC_T00017017001	A0A068V7Y5	unknown protein; FUNCTIONS IN	GO:0016021		-2.97904991983721	3.76515852968185e-05
Cc07_g10250	GSCOC_T00037142001	A0A068U196	Putative Lateral root primordium (LRP) protein-related		AT3G51060	-2.97739385707859	3.13465182700139e-06
Cc03_g14540	GSCOC_T00026671001	A0A068UI91	Predicted protein			-2.97497120260741	9.76623797215524e-06
Cc01_g18800	GSCOC_T00016154001	A0A068U5G2	Photosystem II reaction center W protein, chloroplastic	GO:0009507;GO:0016021;GO:0009523;GO:0015979	AT2G30570	-2.96788358688503	6.59896804032679e-05
Cc01_g09290	GSCOC_T00023979001	A0A068UFE7	Transcription factor TGA2	GO:0003700;GO:0043565;GO:0006351	AT1G08320	-2.96763976890447	4.91092485670289e-05
Cc03_g14460	GSCOC_T00026663001	A0A068UIF2	Putative Rhodanese/Cell cycle control phosphatase superfamily protein			-2.96559425160683	2.45892388310468e-07
Cc08_g12840	GSCOC_T00030423001	A0A068UN10	Adenine phosphoribosyltransferase 1, chloroplastic	GO:0005737;GO:0003999;GO:0006168;GO:0009116	AT4G12440	-2.96491824269367	7.44658418494575e-06
Cc11_g12220	GSCOC_T00032345001	A0A068TWI0	Alpha-1,4 glucan phosphorylase L-2 isozyme, chloroplastic/amyloplastic	GO:0008184;GO:0102250;GO:0030170;GO:0102499;GO:0005975	AT3G29320	-2.96167051389318	1.36315222219672e-05
Cc11_g16670	GSCOC_T00038210001	A0A068UY29	Putative 4-coumarate--CoA ligase-like 5	GO:0003824	AT1G20510	-2.95782329679201	0.00175300769299039
Cc02_g12060	GSCOC_T00029336001	A0A068TTW9	Receptor-like serine/threonine-protein kinase SD1-8	GO:0016021;GO:0005524;GO:0004674	AT4G21380	-2.95770654451631	0.000782394366440132
Cc03_g15460	GSCOC_T00026827001	A0A068UIR8	Putative Chaperone protein dnaJ 20, chloroplastic		AT3G62600	-2.95118445963674	1.26829524881075e-09
Cc01_g02440	GSCOC_T00009708001	A0A068V9C9	Serine carboxypeptidase-like 18	GO:0004185	AT3G10450	-2.93848300671709	1.56434010641402e-06
Cc11_g14050	GSCOC_T00032110001	A0A068TWC5	Two-component response regulator ARR3	GO:0000160	AT1G10470	-2.93579890083004	2.13175160383659e-09
Cc07_g10170	GSCOC_T00037152001	A0A068U0U5	3-epi-6-deoxocathasterone 23-monooxygenase	GO:0020037;GO:0005506;GO:0016709;GO:0016132;GO:0010268;GO:0009965;GO:0042814;GO:0048441;GO:0048443	AT4G36380	-2.93558597083936	9.7593583207233e-06
Cc08_g07720	GSCOC_T00011859001	A0A068VAL0	Hypothetical protein	GO:0004867		-2.93248302782735	0.000565366931930332
Cc02_g05700	GSCOC_T00039085001	A0A068V093	BEST Arabidopsis thaliana protein match is	GO:0046983		-2.93169641817717	1.17379356786125e-06
Cc08_g01090	GSCOC_T00038431001	A0A068UYZ7	LRR receptor-like serine/threonine-protein kinase ERECTA	GO:0016021;GO:0005524;GO:0004674	AT2G26330	-2.92913842251704	9.14485283716583e-06
Cc08_g03510	GSCOC_T00034133001	A0A068UTY8	Cellulose synthase-like protein D3	GO:0016021;GO:0016760;GO:0071555;GO:0030244	AT3G03050	-2.9286110228984	0.00430239016849386
Cc02_g39980	GSCOC_T00027634001	A0A068UJH7	Thylakoid membrane phosphoprotein 14 kDa, chloroplastic	GO:0016021;GO:0009579	AT2G46820	-2.92847475844091	3.38548059312339e-05
Cc05_g12020	GSCOC_T00021242001	A0A068UCB5	Protein kinase superfamily protein	GO:0005886;GO:0005524;GO:0004672	AT1G09600	-2.92844239397047	1.46907945991361e-10
Cc05_g09090	GSCOC_T00002673001	A0A068VD55	Putative late blight resistance protein homolog R1B-8			-2.92780434608167	0.00466345853714128
Cc10_g07710	GSCOC_T00034488001	A0A068TXG2	Transcription factor bHLH74	GO:0046983;GO:0006355	AT1G10120	-2.92770159532403	7.18206081839661e-07
Cc05_g10950	GSCOC_T00021378001	A0A068UCV8	NHL domain-containing protein			-2.92420392069822	1.3261072695799e-10
Cc10_g01310	GSCOC_T00024601001	A0A068UFW4	Probable cinnamyl alcohol dehydrogenase 6	GO:0016491;GO:0008270	AT4G39330	-2.91823705866751	3.17983686625914e-06
Cc08_g11220	GSCOC_T00027119001	A0A068UIM7	peptidyl-prolyl cis-trans isomerases	GO:0003755;GO:0006979		-2.91674090780416	1.11257854096084e-13
Cc06_g06000	GSCOC_T00043170001	A0A068V6B9	Rho GTPase activating protein with PAK-box/P21-Rho-binding domain	GO:0007165	AT5G22400	-2.91620923378831	0.00804684981925495
Cc06_g17200	GSCOC_T00036351001	A0A068UWH9	Myb-related protein 306	GO:0005634;GO:0003677	AT1G08810	-2.90898867669475	1.72122803127135e-06
Cc02_g32550	GSCOC_T00001231001	A0A068VB66	Putative Protein of unknown function DUF679	GO:0016021	AT5G27370	-2.90807394631309	0.00132409182313672
Cc02_g09700	GSCOC_T00029620001	A0A068TV29	Germin-like protein subfamily 3 member 2	GO:0048046;GO:0005618;GO:0030145;GO:0045735	AT3G10080	-2.90432263380815	0.00025600195171361
Cc07_g00630	GSCOC_T00019141001	A0A068V7C9	Putative Probable inactive leucine-rich repeat receptor-like protein kinase At3g03770	GO:0016021;GO:0005524;GO:0004672	AT3G03770	-2.90109552488805	2.13795902616261e-05
Cc10_g03510	GSCOC_T00024877001	A0A068UGH2	30S ribosomal protein S9, chloroplastic (Fragment)	GO:0005840;GO:0003735;GO:0006412	AT1G74970	-2.899905968783	6.46852562939074e-06
Cc02_g10180	GSCOC_T00029557001	A0A068TV56	Putative receptor-like protein kinase At5g39000	GO:0005524;GO:0004672	AT5G39000	-2.89904311623307	0.000657431843555515
Cc05_g13520	GSCOC_T00021052001	A0A068UBY6	Microtubule-associated protein TORTIFOLIA1	GO:0005874;GO:0008017	AT4G27060	-2.89816809454994	1.84115145058711e-05
Cc10_g08350	GSCOC_T00034398001	A0A068TXF5	Putative Rhamnogalacturonate lyase	GO:0030246;GO:0003824;GO:0005975		-2.89602593736031	0.000345960436614633
Cc05_g06700	GSCOC_T00042174001	A0A068V4G8	Probable indole-3-acetic acid-amido synthetase GH3.5		AT4G03400	-2.89366690597561	0.000156945624679049
Cc04_g16560	GSCOC_T00035761001	A0A068UVM0	Geranylgeranyl diphosphate reductase, chloroplastic	GO:0009941;GO:0009535;GO:0045550;GO:0016628;GO:0015995;GO:0015979	AT1G74470	-2.89342479641816	1.44332881042846e-08
Cc06_g07600	GSCOC_T00031241001	A0A068UPY4	Putative BEST Arabidopsis thaliana protein match is			-2.89181141232946	8.77701896777776e-05
Cc11_g14310	GSCOC_T00032073001	A0A068TY06	unknown protein; FUNCTIONS IN			-2.889599297115	5.64413778339394e-08
Cc05_g09930	GSCOC_T00021522001	A0A068UCB4	Chlorophyll a-b binding protein 8, chloroplastic	GO:0009535;GO:0016021;GO:0009522;GO:0009523;GO:0016168;GO:0009765;GO:0018298	AT1G61520	-2.88847459915822	1.69300852672212e-07
Cc08_g13160	GSCOC_T00030375001	A0A068UQK3	Primary amine oxidase	GO:0016021;GO:0005507;GO:0008131;GO:0048038;GO:0009308	AT4G14940	-2.88599687690521	9.55611304228514e-06
Cc03_g08340	GSCOC_T00033238001	A0A068UU87	Putative Nuclear migration protein nudC		AT5G53400	-2.88289939281399	6.64293022418893e-06
Cc08_g00260	GSCOC_T00005584001	A0A068VDJ6	Flotillin-like protein 1	GO:0005901	AT5G25250	-2.88049627665398	4.93927361293629e-06
Cc05_g05550	GSCOC_T00035128001	A0A068UU81	Putative Disease resistance RPP13-like protein 4	GO:0043531;GO:0006952	AT4G16890	-2.8791333444255	9.32940357538208e-09
Cc03_g07800	GSCOC_T00026644001	A0A068TT71	Receptor like protein kinase S.2	GO:0005524;GO:0004674	AT2G32800	-2.87381029702827	9.28445415765668e-07
Cc09_g02950	GSCOC_T00017609001	A0A068U9K0	Putative Auxin-induced protein 5NG4	GO:0016021;GO:0022857	AT1G43650	-2.8718394348838	1.85859568581676e-05
Cc04_g06540	GSCOC_T00022443001	A0A068TSP5	Putative Uncharacterized GPI-anchored protein At4g28100		AT4G28100	-2.87115898208747	1.33796218874598e-05
Cc07_g17010	GSCOC_T00037486001	A0A068UX44	Putative Auxin-induced protein 5NG4	GO:0016021;GO:0022857	AT5G64700	-2.87061250357104	0.000134420326703473
Cc00_g08570	GSCOC_T00005643001	A0A068VFG0	Putative Probable leucine-rich repeat receptor-like protein kinase At1g35710	GO:0005524;GO:0004672	AT3G51740	-2.86065793439908	0.00859256494210447
Cc04_g03070	GSCOC_T00021996001	A0A068TP43	D-isomer specific 2-hydroxyacid dehydrogenase family protein	GO:0051287;GO:0016616	AT1G79870	-2.85401577748574	8.89290740101399e-05
Cc03_g12930	GSCOC_T00030635001	A0A068UP73	Hypothetical protein			-2.85364810191213	1.3943245073256e-06
Cc05_g03560	GSCOC_T00033582001	A0A068US54	Putative Cysteine-rich receptor-like protein kinase 25	GO:0016021;GO:0005524;GO:0004672	AT4G23180	-2.85317977741993	0.000327988816273475
Cc04_g01580	GSCOC_T00021815001	A0A068TPA9	Putative uncharacterized protein	GO:0005829;GO:0016021;GO:0005634;GO:0005886		-2.85290587731809	0.00647344478460455
Cc04_g16030	GSCOC_T00042393001	A0A068V2M1	Putative Transcription factor bHLH79	GO:0046983;GO:0006355	AT5G62610	-2.84757057928222	5.34665940688532e-06
Cc11_g13640	GSCOC_T00032156001	A0A068TVG9	Putative DnaJ homolog subfamily B member 1	GO:0051082;GO:0006457	AT3G62600	-2.84639306489419	7.96371812314387e-09
Cc06_g02880	GSCOC_T00023554001	A0A068UEF4	Short-chain dehydrogenase TIC 32, chloroplastic		AT4G23430	-2.84192862008976	1.99582609524194e-09
Cc05_g01360	GSCOC_T00018212001	A0A068V7B1	Caffeic acid 3-O-methyltransferase	GO:0008171;GO:0046983;GO:0032259		-2.83930680029336	0.0099414761455402
Cc11_g16230	GSCOC_T00038159001	A0A068UYA5	Photosystem II core complex proteins psbY, chloroplastic	GO:0016021;GO:0009523;GO:0030145;GO:0015979	AT1G67740	-2.83850305121063	1.59205225234475e-05
Cc02_g13600	GSCOC_T00029126001	A0A068TTY6	Squamosa promoter-binding protein 1	GO:0042025;GO:0005634;GO:0003677;GO:0003700;GO:0046872;GO:0009908	AT2G33810	-2.83728799216051	5.23606861451811e-12
Cc00_g03400	GSCOC_T00012866001	A0A068VED0	Protein SPIRAL1-like 1	GO:0043622	AT1G26355	-2.83420113336606	2.88068870366699e-11
Cc06_g10640	GSCOC_T00041753001	A0A068U515	Glucan endo-1,3-beta-glucosidase 13	GO:0004553;GO:0005975	AT5G56590	-2.83408881191718	0.00157258194243402
Cc03_g14000	GSCOC_T00031781001	A0A068URC6	Putative Protein of unknown function (DUF1644)			-2.8336091436524	0.00144047307781325
Cc01_g04780	GSCOC_T00028526001	A0A068UL67	Phospholipase A1-Igamma3, chloroplastic	GO:0006629	AT1G51440	-2.82921143399412	2.08994067483941e-05
Cc06_g13690	GSCOC_T00041358001	A0A068U441	Putative Zinc finger protein CONSTANS-LIKE 4	GO:0005634;GO:0008270	AT2G24790	-2.82676758973678	0.00119939250455734
Cc04_g05860	GSCOC_T00022355001	A0A068TPR8	Hypothetical protein	GO:0005634;GO:0003677;GO:0003700	AT5G61890	-2.82588305983397	0.00306580473476827
Cc04_g08280	GSCOC_T00022683001	A0A068TR93	Putative movement protein binding protein 2C	GO:0015630;GO:0008017;GO:0003723;GO:0043622;GO:0051607;GO:0051224;GO:0010497;GO:0002230;GO:0051493;GO:0009414;GO:0010375	AT5G08120	-2.82546074464775	2.41575207921008e-10
Cc10_g07320	GSCOC_T00034538001	A0A068TYP3	unknown protein; BEST Arabidopsis thaliana protein match is		AT2G22260	-2.82386762333144	6.32239941976634e-06
Cc02_g36950	GSCOC_T00003852001	A0A068VDK2	Nectarin-1	GO:0048046;GO:0005618;GO:0030145;GO:0045735	AT3G62020	-2.8159312965962	5.59132356245273e-05
Cc00_g30450	GSCOC_T00013101001	A0A068VMB4	Copper amine oxidase family protein	GO:0016021;GO:0005507;GO:0008131;GO:0048038;GO:0009308		-2.8139734301706	0.000386876714341371
Cc09_g03510	GSCOC_T00017540001	A0A068U7I8	Protein of unknown function (DUF707)	GO:0016021		-2.81381467098823	8.8932801118773e-06
Cc06_g12120	GSCOC_T00041574001	A0A068U3K3	Acyl-CoA N-acyltransferases (NAT) superfamily protein	GO:0008080		-2.81067634855804	3.06736008464182e-05
Cc08_g17170	GSCOC_T00035706001	A0A068UVF1	Probable methyltransferase PMT18	GO:0016021;GO:0008168;GO:0032259	AT1G33170	-2.80441441278501	8.97163873812972e-05
Cc10_g09230	GSCOC_T00034272001	A0A068TZQ8	Protein of unknown function (DUF579)	GO:0045492	AT1G33800	-2.8030713147021	6.69393247546809e-08
Cc10_g08340	GSCOC_T00034400001	A0A068TXY6	Putative Rhamnogalacturonate lyase	GO:0030246		-2.79969622883611	0.00085349099843585
Cc02_g10200	GSCOC_T00029554001	A0A068TUZ0	Putative Receptor-like protein kinase FERONIA	GO:0005524;GO:0004672	AT3G51550	-2.79944813968381	0.00476074387898478
Cc01_g05240	GSCOC_T00011454001	A0A068V9R5	Putative disease resistance protein RGA3	GO:0043531		-2.79424110148297	0.000471932260059728
Cc08_g01670	GSCOC_T00038348001	A0A068UYB3	Putative Disease resistance protein RPM1	GO:0043531;GO:0006952		-2.79120973203292	3.82458559317869e-05
Cc09_g03980	GSCOC_T00017480001	A0A068U6K0	Endoribonuclease Dicer homolog 2	GO:0004525;GO:0003723;GO:0031047;GO:0006396	AT3G03300	-2.79108844615233	6.73129471764565e-05
Cc07_g06280	GSCOC_T00039927001	A0A068U4I3	Putative Uncharacterized protein At4g06744		AT4G06744	-2.79002410402351	3.60503985000521e-05
Cc00_g25800	GSCOC_T00009824001	A0A068VNG3	Hypothetical protein	GO:0004869		-2.7898176339436	6.74536452310771e-12
Cc10_g00410	GSCOC_T00024491001	A0A3P8MYI3	Glyceraldehyde-3-phosphate dehydrogenase B, chloroplastic	GO:0051287;GO:0050661;GO:0016620;GO:0006006	AT1G42970	-2.78971656843447	3.19164326195183e-07
Cc07_g08090	GSCOC_T00040171001	A0A068U3J3	Protein kinase superfamily protein	GO:0005524;GO:0004672	AT5G57670	-2.78932679261154	2.55644585068683e-06
Cc00_g12750	GSCOC_T00001612001	A0A068VGV4	Putative Hydroxycinnamoyl-Coenzyme A shikimate/quinate hydroxycinnamoyltransferase	GO:0016747		-2.78743276684578	0.000321925013684396
Cc07_g15530	GSCOC_T00036464001	A0A068TYS6	Inositol-3-phosphate synthase	GO:0004512;GO:0006021;GO:0008654	AT5G10170	-2.78521566746801	6.36484110620241e-10
Cc05_g08190	GSCOC_T00016833001	A0A068V7N5	CMV 1a interacting protein 1	GO:0008168		-2.78514656576107	3.24432109511357e-05
Cc03_g08210	GSCOC_T00033219001	A0A068URJ9	Putative UPF0481 protein At3g47200	GO:0016021		-2.78507297551325	9.92609428558267e-07
Cc08_g10820	GSCOC_T00027061001	A0A068UIJ5	Putative Thromboxane-A synthase	GO:0016021;GO:0020037;GO:0005506;GO:0004497;GO:0016705	AT2G26170	-2.77875539300517	9.60507919930684e-06
Cc00_g33660	GSCOC_T00007656001	A0A068VQP4	Putative Protein kinase superfamily protein	GO:0016021;GO:0005524;GO:0004672	AT1G66920	-2.77709792422597	1.66395805642322e-05
Cc05_g06370	GSCOC_T00042124001	A0A068V1S7	Putative uncharacterized protein		AT5G38565	-2.7753772786606	0.000105806067562908
Cc10_g05790	GSCOC_T00034765001	A0A068TYV9	no pollen germination related 1		AT1G27460	-2.77467938124349	0.000108245543699703
Cc10_g13900	GSCOC_T00035223001	A0A068UTZ9	Putative Probable serine/threonine-protein kinase NAK	GO:0005524;GO:0004672	AT2G17220	-2.77441313389894	0.000157945358227196
Cc11_g03770	GSCOC_T00033974001	A0A068UT60	Putative Disease resistance protein (CC-NBS-LRR class) family	GO:0043531;GO:0006952		-2.76819684567667	0.000120808064277093
Cc06_g01610	GSCOC_T00023388001	A0A068UD68	Homeodomain-like transcriptional regulator	GO:0005634;GO:0003677	AT5G08520	-2.76810827623662	3.28693429803366e-05
Cc01_g11940	GSCOC_T00028110001	A0A068UKX4	BTB/POZ domain-containing protein At5g60050		AT5G60050	-2.76787283979768	0.000971174829824774
Cc05_g04460	GSCOC_T00031672001	A0A068UQI6	Putative NB-ARC domain-containing disease resistance protein	GO:0043531;GO:0006952		-2.76722818867782	0.000409936088386021
Cc11_g04990	GSCOC_T00020432001	A0A068UA86	Receptor-like protein kinase FERONIA	GO:0016021;GO:0005524;GO:0004672	AT3G51550	-2.7660848294765	0.000125951482949
Cc11_g15800	GSCOC_T00038100001	A0A068UYD1	BTB/POZ domain-containing protein At1g67900		AT1G67900	-2.7622004317231	4.78794122696129e-06
Cc00_g15710	GSCOC_T00006888001	P10795	Ribulose bisphosphate carboxylase small chain SSU11A, chloroplastic	GO:0009507;GO:0004497;GO:0016984;GO:0015977;GO:0009853;GO:0015979;GO:0009507;GO:0004497;GO:0016984;GO:0015977;GO:0009853;GO:0015979	AT1G67090	-2.75631896380452	5.0303894383882e-06
Cc00_g05070	GSCOC_T00000066001	A0A068VD82	Putative Probable LRR receptor-like serine/threonine-protein kinase At4g36180		AT1G48480	-2.75414712000324	0.000484090050451299
Cc02_g16920	GSCOC_T00014194001	A0A068TNQ0	ATP binding microtubule motor family protein	GO:0005874;GO:0005524;GO:0008017;GO:0003777;GO:0007018	AT2G21300	-2.7522104080497	2.48189682858771e-09
Cc04_g12980	GSCOC_T00011361001	A0A068V8V9	Rac-like GTP-binding protein 3	GO:0005525;GO:0003924;GO:0007264	AT5G62880	-2.75156520679677	5.55670654130185e-08
Cc01_g21080	GSCOC_T00005024001	A0A068V8J5	Hypothetical protein	GO:0016021		-2.74322832590171	3.34116938950058e-08
Cc02_g06160	GSCOC_T00039141001	A0A068UZK8	Putative myb-like HTH transcriptional regulator family protein	GO:0005634;GO:0003677	AT1G14600	-2.74235044403211	0.00494513900429215
Cc06_g02700	GSCOC_T00023529001	A0A068UEK0	Actin	GO:0005737;GO:0005856;GO:0005524	AT3G12110	-2.7404400519359	3.39469985286719e-05
Cc07_g01720	GSCOC_T00039348001	A0A068U174	Hypothetical protein			-2.738836808754	0.000914674899271168
Cc09_g10130	GSCOC_T00041085001	A0A068V194	Alpha,alpha-trehalose-phosphate synthase [UDP-forming] 1	GO:0003825;GO:0005992	AT1G78580	-2.73748225416592	0.000605767511579214
Cc00_g22250	GSCOC_T00007434001	A0A068VJ56	Blue copper protein	GO:0016021;GO:0009055	AT2G32300	-2.73570143895643	6.2484683636067e-05
Cc00_g29890	GSCOC_T00005407001	A0A068VM25	Putative Probable carboxylesterase 7	GO:0016787	AT2G03550	-2.73517038486572	0.00544806042719425
Cc03_g07320	GSCOC_T00026577001	A0A068TVP2	Chalcone synthase	GO:0016747;GO:0009058	AT5G13930	-2.734168705051	1.36684138203336e-09
Cc07_g11890	GSCOC_T00036944001	A0A068TZT5	WUSCHEL-related homeobox 8	GO:0005634;GO:0003677	AT4G35550	-2.73211943000183	4.06619070531028e-05
Cc03_g01080	GSCOC_T00025711001	A0A068TS62	Hypothetical protein			-2.72755399781364	1.90742420031358e-05
Cc03_g00620	GSCOC_T00025647001	A0A068TTT9	Putative uncharacterized protein			-2.72673341622775	9.90345080400741e-06
Cc06_g11680	GSCOC_T00041629001	A0A068U3K5	Lycopene epsilon cyclase, chloroplastic	GO:0016705;GO:0016117	AT5G57030	-2.72597629001186	4.40799156391669e-06
Cc04_g12420	GSCOC_T00005302001	A0A068V8W5	Putative uncharacterized protein		AT4G10790	-2.72162730991039	9.18246675237398e-08
Cc11_g07670	GSCOC_T00018020001	A0A068V684	Putative late blight resistance protein homolog R1A-6	GO:0043531;GO:0006952		-2.70440741975585	0.000381442604634
Cc06_g07710	GSCOC_T00031225001	A0A068UPK9	Heparanase-like protein 3	GO:0016021;GO:0016798	AT5G34940	-2.70391684970147	0.000226742716246514
Cc05_g06850	GSCOC_T00042200001	A0A068V4H9	Protochlorophyllide reductase, chloroplastic	GO:0009507;GO:0016630;GO:0015995;GO:0015979	AT1G03630	-2.70377043805314	5.75176931635777e-07
Cc00_g15110	GSCOC_T00008523001	A0A068VHI9	Putative unknown protein; FUNCTIONS IN			-2.70115088236738	0.00747534249821761
Cc03_g03590	GSCOC_T00026052001	A0A068TRV1	Photosystem I reaction center subunit II, chloroplastic	GO:0009538;GO:0015979	AT1G03130	-2.70015962883602	3.48106368032575e-05
Cc06_g17800	GSCOC_T00040371001	A0A068V018	Zeatin O-glucosyltransferase	GO:0008194	AT3G46670	-2.69992513432806	5.36819139550377e-07
Cc08_g14520	GSCOC_T00030212001	A0A068UN93	Putative copper-transporting ATPase HMA5	GO:0016021;GO:0005524;GO:0019829;GO:0005507;GO:0010273;GO:0030001	AT1G63440	-2.697443153249	1.28232276957707e-05
Cc06_g16200	GSCOC_T00030724001	A0A068UP79	Putative disease resistance protein At1g50180	GO:0043531;GO:0006952		-2.69686546931571	0.000141052635023339
Cc05_g11580	GSCOC_T00021297001	A0A068UBU0	Putative Predicted protein	GO:0009507;GO:0010207		-2.69572348610453	4.39284288567333e-05
Cc10_g13070	GSCOC_T00035347001	A0A068UUQ2	Putative Cyanidin-3-O-glucoside 2-O-glucuronosyltransferase	GO:0008194	AT1G78270	-2.69185507340391	1.96883044213524e-10
Cc01_g15890	GSCOC_T00016506001	A0A068U6P1	Photosystem I reaction center subunit XI, chloroplastic	GO:0016021;GO:0009538;GO:0015979	AT4G12800	-2.68999120313739	0.000207450278331119
Cc07_g06410	GSCOC_T00039944001	A0A068U1Z0	Cyclin-D3-1	GO:0042025	AT5G67260	-2.68689422282043	3.08949210353123e-05
Cc08_g06360	GSCOC_T00040940001	A0A068V1B8	glutamine dumper 2	GO:0016021;GO:0080143		-2.68688716391521	0.00530333485622972
Cc02_g34060	GSCOC_T00000637001	A0A068V997	Putative Transcription factor bHLH19		AT4G37850	-2.68432706561758	0.000236475466040778
Cc02_g12370	GSCOC_T00029291001	A0A068TTM2	ARM repeat superfamily protein			-2.68371736735369	1.40818937811797e-06
Cc06_g18960	GSCOC_T00028935001	A0A068ULU8	Putative N-acylneuraminate-9-phosphatase	GO:0016787		-2.68331625816283	8.34893924387229e-13
Cc06_g06960	GSCOC_T00031320001	A0A068UPT8	ABC transporter G family member 22	GO:0016021;GO:0005524;GO:0016887	AT5G06530	-2.68165634260761	0.00113251170888413
Cc10_g11640	GSCOC_T00001438001	A0A068VAW0	Acyl-CoA N-acyltransferases (NAT) superfamily protein	GO:0008080		-2.679279688123	0.000293627712496458
Cc04_g16160	GSCOC_T00042408001	A0A068V331	Putative Microtubule-associated protein TORTIFOLIA1	GO:0005874;GO:0008017	AT5G62580	-2.67889461770774	1.30960367196038e-06
Cc03_g04660	GSCOC_T00026193001	A0A068TSZ6	Auxin-induced protein 22B	GO:0005634;GO:0009734;GO:0006355	AT5G43700	-2.67828606923732	0.000234688216098146
Cc05_g00800	GSCOC_T00013171001	A0A068VAJ2	Hevamine-A	GO:0004553;GO:0005975	AT5G24090	-2.67385281768634	0.00186548388778559
Cc04_g02110	GSCOC_T00021879001	A0A068TNL4	Serine acetyltransferase 5	GO:0005737;GO:0009001;GO:0006535	AT5G56760	-2.672087989247	4.93580375462952e-05
Cc10_g11860	GSCOC_T00031863001	A0A068URG9	Putative unknown protein; CONTAINS InterPro DOMAIN/s			-2.67159661768637	0.00143433289451418
Cc04_g14960	GSCOC_T00010520001	A0A068VAC6	Hypothetical protein	GO:0016021		-2.67125048774301	0.00447444101315235
Cc06_g15140	GSCOC_T00030875001	A0A068URL0	Putative Reticulon-like protein B21	GO:0005789;GO:0016021	AT5G58000	-2.67063476971649	1.8494094422787e-05
Cc05_g00780	GSCOC_T00013169001	A0A068VDT0	Acidic endochitinase	GO:0004553;GO:0005975	AT5G24090	-2.6675592251045	0.00118767440750517
Cc00_g00260	GSCOC_T00036104001	A0A068UXY3	Putative Uncharacterized protein At1g28695	GO:0016021	AT1G28695	-2.66623807044684	0.000594938918055888
Cc02_g17970	GSCOC_T00014329001	A0A068TP04	Protein TIC 62, chloroplastic	GO:0098807	AT3G18890	-2.66611070829133	7.63317095316086e-06
Cc05_g03500	GSCOC_T00033572001	A0A068USY3	Putative Protein ASPARTIC PROTEASE IN GUARD CELL 1	GO:0016021;GO:0004190	AT5G10770	-2.66373510857843	3.24064657675646e-06
Cc00_g26190	GSCOC_T00008978001	A0A068VL23	Putative Probable LRR receptor-like serine/threonine-protein kinase At3g47570	GO:0016021;GO:0005524;GO:0004672	AT3G47570	-2.66250127691766	0.000841069842333726
Cc01_g09790	GSCOC_T00024046001	A0A068UFK2	Putative phytosulfokines 6	GO:0005576;GO:0008083;GO:0008283	AT3G44735	-2.6615852617392	0.00137503121726804
Cc02_g08410	GSCOC_T00029796001	A0A068TUV3	Putative Core-2/I-branching beta-1,6-N-acetylglucosaminyltransferase family protein	GO:0016020	AT5G15050	-2.65789251597357	0.00503754279133891
Cc06_g20000	GSCOC_T00022891001	A0A068UDG6	Receptor-like protein kinase FERONIA	GO:0016021;GO:0005524;GO:0004672	AT3G51550	-2.65700059319891	6.1360932068431e-05
Cc11_g00220	GSCOC_T00019447001	A0A068V8R0	Putative Probable galactinol--sucrose galactosyltransferase 2	GO:0003824	AT3G57520	-2.65318039124754	1.87915541396308e-08
Cc01_g18350	GSCOC_T00016216001	A0A068U5J9	Putative uncharacterized protein			-2.65192547996726	1.40818937811797e-06
Cc05_g11190	GSCOC_T00021347001	A0A068UBR3	Putative Plant Tudor-like protein		AT1G09320	-2.65024625529387	0.000180706385175221
Cc08_g09360	GSCOC_T00017288001	A0A068V8H5	Probable peptide transporter At1g52190	GO:0016021;GO:0022857	AT1G52190	-2.64962072302638	4.61059900916966e-07
Cc00_g00610	GSCOC_T00036155001	A0A068UY17	Putative Protein kinase superfamily protein	GO:0016021;GO:0005524;GO:0004672	AT1G66920	-2.64942251166789	3.20868721598801e-06
Cc02_g19160	GSCOC_T00014480001	A0A068TML4	Putative Polygalacturonase inhibitor 1		AT2G23950	-2.64870838931242	1.84528824130974e-05
Cc07_g05910	GSCOC_T00039878001	A0A068U1T8	Putative uncharacterized protein	GO:0005634;GO:0004861;GO:0007050	AT1G49620	-2.64743540531093	9.37116358417976e-10
Cc07_g04770	GSCOC_T00039738001	A0A068U222	Protein NSP-INTERACTING KINASE 1	GO:0016021;GO:0005524;GO:0004674	AT5G16000	-2.64608002967107	1.03465964006166e-06
Cc08_g07790	GSCOC_T00011873001	A0A068VBC7	3-ketoacyl-CoA synthase 10	GO:0005783;GO:0016021;GO:0016747;GO:0006633;GO:0009409;GO:0080167;GO:0009416	AT2G26250	-2.64333919228585	4.72234251819213e-14
Cc09_g05050	GSCOC_T00007077001	A0A068VCA0	Cationic amino acid transporter 5	GO:0016021;GO:0022857	AT2G34960	-2.64200086453986	5.72645191052604e-06
Cc11_g13590	GSCOC_T00032164001	A0A068TVH2	Nitrate transporter 1.7	GO:0016021;GO:0022857	AT1G69870	-2.64029971324817	1.77721763074375e-09
Cc01_g12260	GSCOC_T00028156001	A0A068UL69	Aquaporin TIP1-1	GO:0016021;GO:0015267	AT2G36830	-2.63856772046957	3.58272286478501e-05
Cc03_g15540	GSCOC_T00026839001	A0A068UIK8	Putative Predicted protein		AT1G59980	-2.63779458425596	1.61339829151854e-07
Cc08_g05270	GSCOC_T00007026001	A0A068VK76	Putative disease resistance protein RGA1			-2.63563098596224	2.73571146122177e-05
Cc01_g07240	GSCOC_T00030156001	A0A068UQ62	Putative 1-aminocyclopropane-1-carboxylate oxidase homolog 12	GO:0046872;GO:0016491	AT3G13610	-2.63234875953258	4.75381057493382e-06
Cc09_g03360	GSCOC_T00017558001	A0A068U7J8	Dynamin-related protein 4C	GO:0005525;GO:0003924	AT1G60500	-2.63059309594131	0.000485761134154267
Cc10_g06910	GSCOC_T00034596001	A0A068TXP7	UDP-glycosyltransferase 85A1	GO:0008194	AT1G22400	-2.63041839265977	0.00153183425779773
Cc04_g02090	GSCOC_T00021876001	A0A068TRD3	Putative Inactive protein kinase SELMODRAFT_444075	GO:0005524;GO:0004672	AT1G23540	-2.6300920758885	3.78093576844381e-07
Cc06_g00740	GSCOC_T00023273001	A0A068UFL4	Putative Macrophage migration inhibitory factor homolog			-2.62820725959956	5.3628674492549e-05
Cc00_g20290	GSCOC_T00010953001	A0A068VJ54	Cysteine proteinase RD19a	GO:0008234	AT4G39090	-2.62818419606399	3.92071766194117e-07
Cc00_g12700	GSCOC_T00012642001	A0A068VGU9	Putative Cysteine/Histidine-rich C1 domain family protein			-2.6258737118872	0.0061714162171346
Cc07_g06250	GSCOC_T00039924001	A0A068U1V0	Probable inactive receptor kinase At5g67200	GO:0016021;GO:0005524;GO:0004672	AT5G67200	-2.62228507219676	1.21918222785642e-05
Cc10_g01080	GSCOC_T00024574001	A0A068UI84	Plastocyanin, chloroplastic	GO:0009535;GO:0005507;GO:0009055	AT1G20340	-2.62176980926361	8.98045265695194e-05
Cc02_g38150	GSCOC_T00027901001	A0A068UKQ2	Cytochrome P450 86A2	GO:0020037;GO:0005506;GO:0004497;GO:0016705	AT2G45970	-2.62153150128216	0.00240681959304646
Cc07_g06870	GSCOC_T00040013001	A0A068U2Q0	Peroxidase 73	GO:0005576;GO:0020037;GO:0046872;GO:0004601;GO:0042744;GO:0006979	AT5G67400	-2.61891868442247	5.23988643499706e-06
Cc00_g26900	GSCOC_T00007718001	A0A068VKX2	Putative Probable LRR receptor-like serine/threonine-protein kinase At4g08850	GO:0005524;GO:0004672		-2.61651277969011	0.00790430765715048
Cc09_g07580	GSCOC_T00036236001	A0A068UWA3	Tubulin beta-3 chain	GO:0005737;GO:0005874;GO:0005525;GO:0003924;GO:0005200;GO:0007017	AT5G23860	-2.61624384510314	5.81740308857878e-13
Cc06_g07510	GSCOC_T00031252001	A0A068UPM7	Putative uncharacterized protein	GO:0008083		-2.61253107981896	0.00494937948666651
Cc01_g16740	GSCOC_T00016405001	A0A068U6G2	Oleoyl-acyl carrier protein thioesterase, chloroplastic (Fragment)	GO:0009507;GO:0016790;GO:0006633		-2.61162215471804	0.00966955476656285
Cc05_g13240	GSCOC_T00021089001	A0A068UB74	unknown protein; FUNCTIONS IN	GO:0009570;GO:0010258		-2.61133571217937	0.00053752594002967
Cc08_g15720	GSCOC_T00035513001	A0A068UUZ8	Putative unknown protein; BEST Arabidopsis thaliana protein match is			-2.61034444275147	0.000191593084330023
Cc04_g09340	GSCOC_T00022817001	A0A068TTJ5	Potassium channel SKOR	GO:0016021;GO:0005249;GO:0034765	AT3G02850	-2.60835579546917	3.92259488688618e-09
Cc02_g19580	GSCOC_T00014526001	A0A068TMU5	Putative Zinc finger SWIM domain-containing protein 7	GO:0005634;GO:0008270;GO:0042742;GO:0000724		-2.60533567353266	0.000121871680826659
Cc04_g04850	GSCOC_T00022224001	A0A068TQM7	Probable receptor-like protein kinase At1g80640	GO:0016021;GO:0005524;GO:0004672	AT1G80640	-2.60445984841822	9.06455642894136e-07
Cc02_g22330	GSCOC_T00014902001	A0A068TNJ7	Basic blue protein	GO:0009055	AT2G02850	-2.60379846639657	4.54431814910075e-05
Cc01_g09770	GSCOC_T00024043001	A0A068UFA7	Nucleobase-ascorbate transporter 12	GO:0016021;GO:0022857	AT2G27810	-2.60294458981853	4.44360136085464e-09
Cc11_g00840	GSCOC_T00019689001	A0A068U8L7	Putative Probable LRR receptor-like serine/threonine-protein kinase At3g47570	GO:0016021;GO:0005524;GO:0004672		-2.60152005262991	0.0074679401365044
Cc11_g15150	GSCOC_T00001010001	A0A068VE06	unknown protein; INVOLVED IN	GO:0000911	AT3G48860	-2.60105326277919	0.000944190806746739
Cc01_g12910	GSCOC_T00028243001	A0A068ULE2	Triosephosphate isomerase, cytosolic	GO:0004807;GO:0006096	AT3G55440	-2.5993904101202	1.45014154556939e-05
Cc05_g08480	GSCOC_T00016870001	A0A068V5V5	Peroxidase 4	GO:0020037;GO:0046872;GO:0004601;GO:0042744;GO:0006979	AT5G05340	-2.59171571532213	2.81803864694516e-05
Cc04_g06340	GSCOC_T00022420001	A0A068TSM5	Thaumatin-like protein		AT1G75040	-2.59029527420614	0.00387835540315209
Cc11_g09660	GSCOC_T00032691001	A0A068TZA2	Probable inactive leucine-rich repeat receptor-like protein kinase At1g66830	GO:0016021;GO:0005524;GO:0004672	AT2G01210	-2.58907760696272	1.13308952162154e-05
Cc03_g05670	GSCOC_T00026332001	A0A068TV92	Putative COP1-interacting protein-related	GO:0005886		-2.5858673633087	1.06498043033886e-05
Cc09_g09430	GSCOC_T00023043001	A0A068UF95	Cytochrome P450 710A1	GO:0016021;GO:0020037;GO:0005506;GO:0004497;GO:0016705		-2.58351994784168	0.00388653592954146
Cc03_g04210	GSCOC_T00026131001	A0A068TSU1	Plant protein of unknown function (DUF828) with plant pleckstrin homology-like region		AT3G63300	-2.58277235293136	8.21306124583247e-05
Cc08_g13220	GSCOC_T00030368001	A0A068UNK0	Putative Protein STRUBBELIG-RECEPTOR FAMILY 8	GO:0016021;GO:0005886;GO:0005524;GO:0004672		-2.58009685399099	0.0010929851269942
Cc00_g31870	GSCOC_T00001691001	A0A068VML7	Putative Glutathione transferase GST 23		AT2G29490	-2.57897065492143	3.87292193317224e-05
Cc05_g01750	GSCOC_T00015751001	A0A068V782	Cytochrome P450 82G1	GO:0020037;GO:0005506;GO:0004497;GO:0016705	AT3G25180	-2.57827973313069	0.00846662525115868
Cc10_g07490	GSCOC_T00034515001	A0A068TY76	Probable beta-D-xylosidase 7	GO:0004553;GO:0005975	AT1G78060	-2.57751723853347	0.00579494337450244
Cc04_g04430	GSCOC_T00022168001	A0A068TQ77	PTI1-like tyrosine-protein kinase At3g15890	GO:0005524;GO:0004674	AT3G15890	-2.57604853164319	8.34254305477257e-08
Cc00_g33740	GSCOC_T00012504001	A0A068VMY5	Putative Probable LRR receptor-like serine/threonine-protein kinase At4g08850	GO:0016021;GO:0005524;GO:0004672	AT4G08850	-2.57567889370905	0.00466345853714128
Cc07_g04040	GSCOC_T00039654001	A0A068U2A5	Putative uncharacterized protein		AT3G29310	-2.57550051766681	7.47986641583524e-07
Cc02_g21960	GSCOC_T00014847001	A0A068TN94	Peroxidase 43	GO:0005576;GO:0020037;GO:0046872;GO:0004601;GO:0042744;GO:0006979		-2.57381862957027	0.00694359579182006
Cc08_g13490	GSCOC_T00030338001	A0A068UMU8	Putative uncharacterized protein		AT3G52770	-2.57272242592244	3.1577854717228e-05
Cc06_g01630	GSCOC_T00023391001	A0A068UE05	unknown protein; FUNCTIONS IN			-2.57262831097946	0.00173001394639835
Cc08_g02440	GSCOC_T00037718001	A0A068UZB9	NAC domain containing protein 71	GO:0005634;GO:0003677;GO:0006355	AT4G17980	-2.56895324920484	6.27119647101914e-05
Cc06_g18630	GSCOC_T00040487001	A0A068V2Z2	Putative methyltransferase DDB_G0268948	GO:0008168		-2.56856294957	0.00381523504332742
Cc04_g14150	GSCOC_T00035944001	A0A068UVT2	Putative Dof zinc finger protein DOF5.6	GO:0005634;GO:0003677;GO:0006355	AT5G62940	-2.56843235922599	0.00210463761188365
Cc04_g02840	GSCOC_T00021966001	A0A068TRL1	Aquaporin TIP2-1	GO:0016021;GO:0015267	AT3G16240	-2.56105810466775	0.000163934901271994
Cc01_g15390	GSCOC_T00016566001	A0A068U6U6	Probable inactive receptor kinase At5g58300	GO:0005524;GO:0004672	AT5G58300	-2.56022459362581	6.92051741979923e-05
Cc05_g15930	GSCOC_T00038624001	A0A068V149	Photosystem II 10 kDa polypeptide, chloroplastic	GO:0009535;GO:0016021;GO:0009654;GO:0010270	AT1G79040	-2.55860361931869	9.95986702244031e-05
Cc01_g09780	GSCOC_T00024045001	A0A068UH55	Arogenate dehydratase/prephenate dehydratase 6, chloroplastic	GO:0009570;GO:0047769;GO:0004664;GO:0009094	AT1G08250	-2.5584315284748	2.84879521858311e-05
Cc03_g02000	GSCOC_T00025835001	A0A068TRL2	Probable protein phosphatase 2C 40	GO:0004722	AT3G16560	-2.55701792162908	0.000464636817588011
Cc04_g09720	GSCOC_T00000093001	A0A068VID2	Thylakoid lumenal 17.9 kDa protein, chloroplastic	GO:0009507;GO:0031977	AT4G24930	-2.55379445484062	0.000344641832666254
Cc03_g12790	GSCOC_T00015155001	A0A068U725	Putative disease resistance protein RGA4	GO:0043531;GO:0006952	AT1G12970	-2.55264710171741	0.00546444508119151
Cc05_g05830	GSCOC_T00035168001	A0A068UTL2	Putative UDP-glucose flavonoid 3-O-glucosyltransferase 3	GO:0005524;GO:0004672;GO:0008194	AT3G21800	-2.54759618019391	1.13511318589746e-05
Cc04_g03020	GSCOC_T00021988001	A0A068TP38	Putative Uncharacterized protein At4g01150, chloroplastic	GO:0016021;GO:0009579	AT1G52220	-2.54739820093696	9.96129661021169e-08
Cc09_g03520	GSCOC_T00017537001	A0A068U6W7	Putative uncharacterized protein			-2.54577515715769	5.62825035946635e-05
Cc00_g29600	GSCOC_T00002220001	A0A068VPK0	Cellulose synthase-like protein B6	GO:0016021;GO:0016760;GO:0030244	AT2G32530	-2.54559701688724	0.00132409182313672
Cc02_g17060	GSCOC_T00014210001	A0A068TLZ3	Kinesin motor family protein	GO:0005524;GO:0008017;GO:0003777;GO:0007018	AT4G39050	-2.54240481626205	0.000420258229014115
Cc06_g12210	GSCOC_T00041565001	A0A068U436	Putative receptor-like protein kinase At1g72540	GO:0005524;GO:0004672		-2.54173439499658	0.0029685327284861
Cc09_g01270	GSCOC_T00017834001	A0A068U7E7	Protein STRUBBELIG-RECEPTOR FAMILY 8	GO:0016021;GO:0005524;GO:0004672	AT4G22130	-2.53972030543549	0.000196027169628133
Cc04_g09740	GSCOC_T00000095001	A0A068VIX5	Putative Probable NAD(P)H-dependent oxidoreductase 2	GO:0016491	AT2G37790	-2.53456484111865	6.3014275154886e-11
Cc08_g01560	GSCOC_T00038368001	A0A068UYN8	Protein of unknown function (DUF581)		AT4G17670	-2.53455549153172	2.76765867563213e-06
Cc07_g05830	GSCOC_T00039865001	A0A068U4E2	NAD(P)-binding Rossmann-fold superfamily protein			-2.53243971741546	9.40676158643823e-05
Cc02_g15470	GSCOC_T00013995001	A0A068TNA5	Putative Receptor-like protein 12	GO:0016021	AT4G18760	-2.53229630512804	0.000274660247825458
Cc07_g00930	GSCOC_T00019175001	A0A068V7I8	unknown protein; FUNCTIONS IN	GO:0016021		-2.53212421886246	0.000721646093566367
Cc07_g05880	GSCOC_T00039874001	A0A068U4E7	Putative Patatin group A-3	GO:0016787;GO:0016042	AT4G37070	-2.53023666905158	0.00951660581445748
Cc06_g07250	GSCOC_T00031287001	A0A068UQ18	RNA binding (RRM/RBD/RNP motifs) family protein	GO:0005634;GO:0003723;GO:0050832	AT5G16840	-2.52710876528406	9.47241894242099e-05
Cc11_g06540	GSCOC_T00020671001	A0A068UAN2	Putative Receptor-like protein 12	GO:0016021	AT4G37250	-2.52380708666144	0.00517613314742998
Cc02_g30730	GSCOC_T00023815001	A0A068UGQ5	Auxin-responsive protein IAA16	GO:0005634;GO:0009734;GO:0006355	AT3G04730	-2.52312950753285	5.24514983707688e-07
Cc00_g31460	GSCOC_T00011251001	A0A068VLZ4	Putative UDP-rhamnose	GO:0008194	AT2G22590	-2.52029665817321	0.00150030563069945
Cc07_g07110	GSCOC_T00040048001	A0A068U257	Putative unknown protein; FUNCTIONS IN	GO:0016021		-2.51726022980195	0.000115312462436833
Cc09_g03070	GSCOC_T00017592001	A0A068U702	Protein of Unknown Function (DUF239)			-2.5168071935492	4.46677760626599e-05
Cc02_g22170	GSCOC_T00014883001	A0A068TQ73	Late embryogenesis abundant (LEA) hydroxyproline-rich glycoprotein family			-2.51668753485792	1.67624836415425e-05
Cc08_g12950	GSCOC_T00030407001	A0A068UNT1	Protein YABBY 4	GO:0007275	AT2G45190	-2.51346849390135	9.23506690087652e-08
Cc09_g01770	GSCOC_T00017766001	A0A068U7B1	Putative Protein TRANSPARENT TESTA 12	GO:0016021;GO:0015297;GO:0042910	AT3G21690	-2.5112288307995	0.00223136637553396
Cc07_g02590	GSCOC_T00039457001	A0A068U1X1	Peroxidase 63	GO:0005576;GO:0020037;GO:0046872;GO:0004601;GO:0042744;GO:0006979	AT5G40150	-2.50947733070907	0.000516537545048129
Cc04_g05100	GSCOC_T00022255001	A0A068TQP1	NDH-dependent cyclic electron flow 1		AT1G15980	-2.50892410687754	0.002085867436413
Cc08_g15610	GSCOC_T00035500001	A0A068UUL5	ABC transporter C family member 10	GO:0016021;GO:0005524;GO:0016887;GO:0042626	AT3G59140	-2.50852401237863	7.35244527268608e-05
Cc00_g12190	GSCOC_T00012517001	A0A068VGC7	Elicitor-responsive protein 3		AT1G63220	-2.50844317543117	1.03175428147278e-06
Cc02_g13570	GSCOC_T00029131001	A0A068TT91	30S ribosomal protein S5, chloroplastic	GO:0015935;GO:0003723;GO:0003735;GO:0006412	AT2G33800	-2.50413555434527	0.000972712972357625
Cc05_g11820	GSCOC_T00021266001	A0A068UCD3	Serine/threonine-protein kinase WNK (With No Lysine)-related			-2.50226619791545	3.39430067433879e-07
Cc00_g01150	GSCOC_T00019008001	A0A068V7W0	Putative unknown protein; FUNCTIONS IN			-2.50119166292267	0.000230662210498476
Cc05_g04910	GSCOC_T00035035001	A0A068UW04	Putative unknown protein; Has 35333 Blast hits to 34131 proteins in 2444 species	GO:0010089		-2.49734655059558	1.95948770387398e-05
Cc02_g32730	GSCOC_T00016689001	A0A068V5J5	Putative Prefoldin chaperone subunit family protein	GO:0016021		-2.49656098284877	0.00194505554354836
Cc03_g09250	GSCOC_T00042693001	A0A068V3H8	Probable metal-nicotianamine transporter YSL6	GO:0016021;GO:0055085	AT3G27020	-2.49613905502274	0.000306424052395087
Cc10_g00160	GSCOC_T00024454001	A0A068UFL7	Putative Probable inactive serine/threonine-protein kinase bub1	GO:0007094	AT2G33560	-2.49479491166506	0.00440422449082276
Cc07_g14700	GSCOC_T00036578001	A0A068TZZ3	Serine/threonine-protein kinase SAPK2	GO:0005524;GO:0004674	AT4G33950	-2.49341042404733	1.92657762086388e-05
Cc08_g05740	GSCOC_T00024363001	A0A068UF89	Chitinase-like protein 2	GO:0004568;GO:0016998;GO:0006032	AT1G05850	-2.49288149076904	2.73375470547442e-05
Cc07_g06780	GSCOC_T00040002001	A0A068U4N8	Hypothetical protein			-2.49190588629976	0.00274122372293416
Cc11_g00610	GSCOC_T00004222001	A0A068VCI9	Glyceraldehyde-3-phosphate dehydrogenase A, chloroplastic	GO:0051287;GO:0050661;GO:0016620;GO:0006006	AT1G12900	-2.4917613310551	3.21221706794809e-05
Cc01_g11220	GSCOC_T00024241001	A0A068UFS5	Putative BEST Arabidopsis thaliana protein match is	GO:0008168		-2.49102850233369	4.74314483165181e-06
Cc07_g14030	GSCOC_T00036664001	A0A068TZ79	Nucleobase-ascorbate transporter 11	GO:0016021;GO:0005886;GO:0022857	AT4G38050	-2.49090674079023	3.94623099019773e-06
Cc01_g12480	GSCOC_T00028184001	A0A068UKL4	Molybdopterin biosynthesis protein CNX3	GO:0006777	AT1G01290	-2.48976969433764	0.000837400559227631
Cc03_g07690	GSCOC_T00026629001	A0A068TT24	Uncharacterized protein	GO:0046872;GO:0030001		-2.48909108496302	0.000119729904969388
Cc01_g03960	GSCOC_T00040880001	A0A068V191	Putative G-type lectin S-receptor-like serine/threonine-protein kinase RLK1			-2.48840425551605	0.000208055041505806
Cc03_g05030	GSCOC_T00026240001	A0A068TTE1	Putative Cellulose synthase-like protein G1	GO:0016021;GO:0016760;GO:0071555;GO:0030244	AT1G32180	-2.48755538211115	4.89533351214708e-09
Cc04_g05240	GSCOC_T00022271001	A0A068TSD5	Hypothetical protein			-2.48572415108475	0.000798531880048163
Cc07_g03150	GSCOC_T00039533001	A0A068U115	Putative Protein IQ-DOMAIN 31		AT1G74690	-2.48323013678896	1.58881585057343e-06
Cc04_g07650	GSCOC_T00022597001	A0A068TRA5	Cyclophilin-like peptidyl-prolyl cis-trans isomerase family protein	GO:0003755	AT1G74070	-2.48219468478687	2.42912102634504e-07
Cc07_g01970	GSCOC_T00039376001	A0A068U1A9	Phosphoenolpyruvate/phosphate translocator 2, chloroplastic	GO:0016021;GO:0015121;GO:0071917	AT3G01550	-2.48151987810614	1.89404681701539e-06
Cc08_g09450	GSCOC_T00026884001	A0A068UIV9	Putative UPF0481 protein At3g02645	GO:0016021		-2.47880457700988	0.000300696432491631
Cc02_g07500	GSCOC_T00029931001	A0A068TVS2	Ribulose bisphosphate carboxylase/oxygenase activase 1, chloroplastic	GO:0048046;GO:0005618;GO:0009941;GO:0009535;GO:0005634;GO:0010287;GO:0010319;GO:0043531;GO:0005524;GO:0046863;GO:0042742;GO:0010150;GO:0009409;GO:0009753;GO:0009416	AT2G39730	-2.47819532904122	1.37424695102219e-06
Cc05_g07120	GSCOC_T00042235001	A0A068V1Y1	Hypothetical protein			-2.47585999977636	0.000282589256169594
Cc10_g05870	GSCOC_T00034748001	A0A068TZ71	Low affinity sulfate transporter 3	GO:0016021;GO:0008271	AT5G10180	-2.47491717199135	0.00332275713320728
Cc01_g02550	GSCOC_T00009684001	A0A068VA00	Putative F-box protein At5g07610			-2.47349024410882	0.00492406347531155
Cc11_g10430	GSCOC_T00032580001	A0A068TWG0	Putative peptide/nitrate transporter At2g38100	GO:0016021;GO:0022857		-2.47183141038407	0.0013477683194484
Cc06_g13170	GSCOC_T00041436001	A0A068U3A0	Putative Protein VERNALIZATION INSENSITIVE 3		AT4G30200	-2.47085189491151	5.61168508542688e-06
Cc02_g30790	GSCOC_T00023825001	A0A068UF52	Putative LRR receptor-like serine/threonine-protein kinase FLS2	GO:0016021;GO:0005524;GO:0004672	AT1G16110	-2.47071876929572	0.00305243820442222
Cc01_g14410	GSCOC_T00028439001	A0A068ULX5	Plant protein of unknown function (DUF828)		AT5G58600	-2.47068731956914	0.000364855277796705
Cc04_g13440	GSCOC_T00018287001	A0A068V6K8	Predicted protein		AT5G14920	-2.47002259411309	7.25603323606281e-05
Cc06_g21340	GSCOC_T00018132001	A0A068V8T8	Putative hydroxyproline-rich glycoprotein family protein	GO:0016021		-2.46968064097873	1.10439095509744e-07
Cc06_g10560	GSCOC_T00041762001	A0A068U4N9	IQ-domain 26			-2.46930015670308	0.00405627570885384
Cc05_g00840	GSCOC_T00013178001	A0A068VBC0	Oxygen-evolving enhancer protein 2, chloroplastic	GO:0019898;GO:0009654;GO:0005509;GO:0015979	AT1G06680	-2.46787176956279	0.000124371348029557
Cc11_g05000	GSCOC_T00020436001	A0A068UAU1	Receptor-like protein kinase FERONIA	GO:0016021;GO:0005524;GO:0004672	AT3G51550	-2.46711894376987	1.46636290220032e-06
Cc01_g14040	GSCOC_T00028391001	A0A068ULM9	Tetratricopeptide repeat (TPR)-like superfamily protein			-2.46370680499542	1.34086410466983e-05
Cc06_g16420	GSCOC_T00030695001	A0A068UNI2	Putative Transcription factor bHLH60	GO:0046983;GO:0006355	AT2G42300	-2.4616079202911	1.64680022982095e-07
Cc02_g11760	GSCOC_T00029374001	A0A068TU09	Thioredoxin-like protein CXXS1	GO:0005829;GO:0003756	AT1G11530	-2.46095290092895	1.75003924343993e-05
Cc03_g04670	GSCOC_T00026194001	A0A068TUY9	Auxin-responsive protein IAA7	GO:0005634;GO:0009734;GO:0006355	AT3G23050	-2.45317087492236	4.28875296658199e-05
Cc00_g29280	GSCOC_T00011749001	A0A068VLD9	Codeine O-demethylase	GO:0046872;GO:0016491	AT1G17020	-2.45297251482128	1.46818665277049e-08
Cc11_g05410	GSCOC_T00020497001	A0A068UCS2	Putative phagocytic receptor 1b	GO:0016021	AT2G01970	-2.452006878969	0.000182220352333736
Cc11_g01040	GSCOC_T00019652001	A0A068U8J8	Hypothetical protein			-2.45135159152215	2.37652945645612e-08
Cc07_g06180	GSCOC_T00039914001	A0A068U4H3	Putative Filament-like plant protein 7		AT2G23360	-2.45051406885951	0.00236878631001729
Cc07_g04970	GSCOC_T00039758001	A0A068U240	Putative NAD(P)-binding Rossmann-fold superfamily protein	GO:0003854;GO:0006694		-2.44997498717521	8.0472315525726e-05
Cc09_g06160	GSCOC_T00033352001	A0A068USH3	Formate dehydrogenase, mitochondrial	GO:0009326;GO:0005739;GO:0008863;GO:0051287;GO:0016616;GO:0042183	AT5G14780	-2.44788854691004	4.79794486470181e-07
Cc07_g10290	GSCOC_T00037136001	A0A068U080	Aldehyde dehydrogenase family 3 member F1	GO:0005783;GO:0016620;GO:0006081	AT4G36250	-2.44675538321214	7.2053682979029e-09
Cc06_g01510	GSCOC_T00023372001	A0A068UD59	Auxin transporter-like protein 2	GO:0016021	AT2G38120	-2.44656902299522	4.78448605853481e-05
Cc00_g08670	GSCOC_T00006865001	A0A068VFD5	unknown protein; FUNCTIONS IN		AT5G12900	-2.4462658018996	2.29696367506865e-05
Cc07_g14530	GSCOC_T00036605001	A0A068TZ29	Putative uncharacterized protein			-2.4441402167034	0.000123691456231407
Cc03_g01950	GSCOC_T00025828001	A0A068TRK7	ralf-like 33		AT3G16570	-2.4426470737847	2.422021452196e-06
Cc10_g08170	GSCOC_T00034428001	A0A068TYF3	Glutamyl-tRNA reductase 1, chloroplastic	GO:0008883;GO:0050661;GO:0006782	AT1G58290	-2.44082232221115	5.59623073226738e-13
Cc00_g26060	GSCOC_T00003724001	A0A068VKP4	Heavy metal transport/detoxification superfamily protein	GO:0046872;GO:0030001		-2.44043429551553	6.86905763166005e-13
Cc06_g17380	GSCOC_T00036382001	A0A068UVV9	Probable inactive leucine-rich repeat receptor-like protein kinase At3g03770	GO:0016021;GO:0005524;GO:0004672	AT3G03770	-2.44037535299758	0.000360056086339281
Cc06_g20230	GSCOC_T00022936001	A0A068UDB0	Probable nitrite transporter At1g68570	GO:0016021;GO:0022857	AT1G68570	-2.43943409661246	5.44587348815819e-10
Cc02_g09280	GSCOC_T00029677001	A0A068TVE1	unknown protein; FUNCTIONS IN			-2.43889878653948	5.47192981397487e-07
Cc02_g04630	GSCOC_T00020380001	A0A068UAY7	Putative kinase-like protein TMKL1	GO:0016021;GO:0005524;GO:0004672		-2.43799912614232	0.0078723385862171
Cc01_g19690	GSCOC_T00016026001	A0A068U5N6	Putative uncharacterized protein	GO:0046983	AT4G30980	-2.43587049655987	2.8083640641274e-06
Cc08_g10880	GSCOC_T00027069001	A0A068UJ31	Cytokinin riboside 5'-monophosphate phosphoribohydrolase LOG8	GO:0016787;GO:0009691	AT5G11950	-2.4350706977994	0.00197957886490059
Cc02_g13780	GSCOC_T00029098001	A0A068TU53	Predicted protein			-2.43431494536817	6.50593149888566e-06
Cc01_g17320	GSCOC_T00016338001	A0A068U6N2	Putative kinase-like protein TMKL1	GO:0005524;GO:0004672	AT3G24660	-2.4322426261839	0.0084316979754339
Cc06_g15570	GSCOC_T00030803001	A0A068UNU7	Putative zinc finger protein 8		AT2G41940	-2.4311334825042	0.000363253488011484
Cc00_g13120	GSCOC_T00010670001	A0A068VH13	Probable sarcosine oxidase	GO:0016491	AT2G24580	-2.43018986231961	0.00778229814673433
Cc04_g13430	GSCOC_T00018290001	A0A068V6W6	Putative Calmodulin binding protein-like	GO:0005516	AT5G62570	-2.42924361921633	2.89336365273109e-06
Cc09_g02070	GSCOC_T00017724001	A0A068U786	Putative Tyrosine-specific transport protein	GO:0016021;GO:0003333		-2.42834658765584	0.00366848762259019
Cc02_g29080	GSCOC_T00011537001	A0A068VF15	Putative Bifunctional dihydroflavonol 4-reductase/flavanone 4-reductase	GO:0003824	AT1G15950	-2.42655718570074	7.03052504304677e-05
Cc07_g13920	GSCOC_T00036677001	A0A068TZU9	Putative UDP-rhamnose	GO:0016021;GO:0008194	AT5G49690	-2.42450521440557	0.00059691346216293
Cc06_g16310	GSCOC_T00030711001	A0A068UNT8	Putative Uncharacterized protein C4orf29 homolog			-2.4234406843281	0.000399935821768593
Cc05_g05150	GSCOC_T00035070001	A0A068UU44	Cyclin-U1-1	GO:0019901;GO:0000079	AT3G21870	-2.42238707444533	0.000143080476859419
Cc01_g09970	GSCOC_T00024074001	A0A068UFC7	Putative Bifunctional polymyxin resistance protein ArnA	GO:0003824	AT1G08200	-2.41892603884031	1.55373608727475e-13
Cc07_g06510	GSCOC_T00039961001	A0A068U1Z9	Putative Xyloglucan galactosyltransferase KATAMARI1 homolog	GO:0016757;GO:0006486	AT5G62220	-2.41697309532145	7.59911265539735e-06
Cc04_g14540	GSCOC_T00040698001	A0A068V1C2	L-type lectin-domain containing receptor kinase IV.1	GO:0016021;GO:0005524;GO:0030246;GO:0004672	AT2G37710	-2.41511565563118	0.00189923113450078
Cc00_g03090	GSCOC_T00003064001	A0A068VBG1	Putative uncharacterized protein	GO:0007623;GO:0006355		-2.41348956825819	1.79159880009063e-05
Cc03_g09300	GSCOC_T00042688001	A0A068V3H3	Putative UDP-glycosyltransferase 75D1	GO:0008194	AT4G15550	-2.4133731381114	3.58042805811632e-12
Cc00_g19740	GSCOC_T00011283001	A0A068VIF1	Hypothetical protein		AT2G23380	-2.4121458282606	0.00354785857383841
Cc01_g08770	GSCOC_T00023912001	A0A068UF14	Putative unknown protein; LOCATED IN			-2.41167160807969	0.00151469366855657
Cc02_g36400	GSCOC_T00003928001	A0A068VDP2	Cytochrome P450 76C4	GO:0016021;GO:0020037;GO:0005506;GO:0016705	AT2G45550	-2.41073118343315	3.68934828821307e-05
Cc01_g07860	GSCOC_T00015461001	A0A068V4S5	Putative axial regulator YABBY 2	GO:0007275	AT1G08465	-2.41051528003023	8.55128545724719e-10
Cc10_g06450	GSCOC_T00034654001	A0A068TXZ6	Putative Hypoxanthine-guanine phosphoribosyltransferase	GO:0005829;GO:0052657;GO:0004422;GO:0046872;GO:0000166;GO:0046098;GO:0046100;GO:0032264;GO:0006166;GO:0009845		-2.40779721673115	4.26108333277293e-05
Cc09_g03180	GSCOC_T00017581001	A0A068U6U5	Putative uncharacterized protein			-2.40629739410456	0.00182612205871738
Cc02_g32500	GSCOC_T00001237001	A0A068VB71	Putative Sugar transporter ERD6-like 5	GO:0016021;GO:0022857	AT1G54730	-2.4049939743363	4.33895078822849e-05
Cc10_g06960	GSCOC_T00034591001	A0A068TXP2	UDP-glycosyltransferase 85A1	GO:0008194	AT1G22400	-2.40463353231614	0.00116398576879215
Cc02_g13910	GSCOC_T00029080001	A0A068TT98	NAC domain containing protein 10	GO:0005634;GO:0003677;GO:0006355	AT4G28500	-2.40457926975094	0.000151473770771622
Cc02_g14560	GSCOC_T00013869001	A0A068TLB6	Putative GDSL esterase/lipase At1g28590	GO:0016788	AT1G28590	-2.40426666842036	0.000548076859574315
Cc02_g21420	GSCOC_T00014783001	A0A068TPZ4	Putative uncharacterized protein		AT1G02170	-2.4025838035917	2.28380084437754e-05
Cc08_g12650	GSCOC_T00030448001	A0A068UNV7	Putative unknown protein; BEST Arabidopsis thaliana protein match is	GO:0016021		-2.40218882678828	0.00717412191936507
Cc10_g10360	GSCOC_T00031423001	A0A068UQW8	Putative Wall-associated receptor kinase 2	GO:0016021;GO:0005524;GO:0005509;GO:0030247;GO:0004672	AT1G21270	-2.40202088689779	0.00709689483523576
Cc05_g07500	GSCOC_T00042280001	A0A068V4M3	Putative uncharacterized protein	GO:0042025;GO:0005634;GO:0003677;GO:0046872	AT1G53160	-2.40144590374225	5.23930611138352e-08
Cc02_g17340	GSCOC_T00014246001	A0A068TL29	Glucose-1-phosphate adenylyltransferase large subunit 1 (Fragment)	GO:0009507;GO:0005524;GO:0008878;GO:0005978;GO:0019252	AT4G39210	-2.40115632972792	2.18769151390725e-06
Cc09_g03930	GSCOC_T00017485001	A0A068U6M9	Calreticulin-3	GO:0005788;GO:0005509;GO:0051082;GO:0006457	AT1G08450	-2.4004379046729	0.000121871680826659
Cc00_g00210	GSCOC_T00036098001	A0A068UXX8	Auxin response factor 19	GO:0005634;GO:0003677;GO:0009734;GO:0006355	AT1G19220	-2.39928821311201	4.15249139683316e-06
Cc02_g03340	GSCOC_T00020215001	A0A068U9M5	Putative uncharacterized protein	GO:0004842;GO:0046621	AT3G63530	-2.39894256657789	1.38970055152709e-08
Cc03_g05520	GSCOC_T00026309001	A0A068TV82	Myb-related protein Myb4	GO:0005634;GO:0003677	AT3G23250	-2.39853397514943	0.000159563688094102
Cc05_g08180	GSCOC_T00016832001	A0A068V5S4	Putative uncharacterized protein OSJNBa0095J15.6			-2.39540492338436	3.37512677939271e-05
Cc07_g01730	GSCOC_T00039349001	A0A068U378	Hypothetical protein			-2.39498150259854	0.000176657906845272
Cc02_g05820	GSCOC_T00039102001	A0A068UZU9	Heavy metal transport/detoxification superfamily protein	GO:0046872;GO:0030001	AT3G56240	-2.39420580755256	7.11524997520242e-05
Cc07_g14810	GSCOC_T00036566001	A0A068U1K7	Hypothetical protein			-2.39267551782145	0.00473651941350788
Cc06_g17830	GSCOC_T00040374001	A0A068V2N2	Zeatin O-glucosyltransferase	GO:0008194	AT3G11340	-2.38793994192826	1.63468281297003e-07
Cc05_g16370	GSCOC_T00038571001	A0A068UZ98	Phosphoglycerate kinase, cytosolic	GO:0005524;GO:0004618;GO:0006096	AT1G56190	-2.3871871614721	6.18662768273964e-06
Cc02_g36770	GSCOC_T00003881001	A0A068VAM1	Ferric reduction oxidase 7, chloroplastic	GO:0016021;GO:0016491	AT5G49740	-2.3866491028941	0.00107431041401223
Cc07_g10450	GSCOC_T00037115001	A0A068U175	Probable fructose-bisphosphate aldolase 2, chloroplastic	GO:0004332;GO:0006096	AT4G38970	-2.38659625375135	0.000183271787119249
Cc07_g17420	GSCOC_T00037434001	A0A068UYT1	RING-H2 finger protein ATL78	GO:0016021		-2.38557046920493	0.00673547897298783
Cc11_g17510	GSCOC_T00038325001	A0A068UXY2	Acyl carrier protein 1, chloroplastic	GO:0009941;GO:0009570;GO:0031177;GO:0006633;GO:0009416	AT1G54630	-2.38326433671421	0.0049575195188545
Cc10_g09340	GSCOC_T00031558001	A0A068UQR2	12-oxophytodienoate reductase 2	GO:0010181;GO:0016491	AT1G76690	-2.38305394934741	8.11791745819713e-07
Cc00_g26750	GSCOC_T00003171001	A0A068VKV6	Anthocyanidin 5,3-O-glucosyltransferase	GO:0008194	AT3G16520	-2.38272568296932	5.49439962936667e-06
Cc02_g32670	GSCOC_T00001209001	A0A068VBL3	UPF0603 protein At1g54780, chloroplastic	GO:0009535;GO:0016021;GO:0031977;GO:0003993;GO:0010206	AT1G54780	-2.38143543035056	0.000137948046361668
Cc03_g11020	GSCOC_T00042054001	A0A068V1K3	Kirola	GO:0006952	AT1G70830	-2.38041029583471	0.000337219676534946
Cc07_g05630	GSCOC_T00039841001	A0A068U4C0	7-ethoxycoumarin O-deethylase	GO:0020037;GO:0005506;GO:0004497;GO:0016705	AT2G45570	-2.37773647854067	0.00176247390049566
Cc10_g01720	GSCOC_T00024658001	A0A068UGI9	Hexokinase-2, chloroplastic	GO:0005524;GO:0005536;GO:0004396;GO:0001678;GO:0006096		-2.37568673223981	0.00539164885725524
Cc07_g07230	GSCOC_T00040063001	A0A068U4T5	Glycosyltransferase 6	GO:0016021;GO:0016757	AT4G37690	-2.37512723250735	1.25265169630103e-06
Cc04_g07480	GSCOC_T00022567001	A0A068TR02	Putative receptor protein kinase ZmPK1	GO:0016021;GO:0005524;GO:0004674;GO:0048544	AT5G15080	-2.37269145827334	0.00348559226745113
Cc06_g01860	GSCOC_T00023422001	A0A068UD94	Fructose-1,6-bisphosphatase, chloroplastic	GO:0042132;GO:0005975	AT3G54050	-2.36494251581998	0.000433572080147012
Cc11_g01050	GSCOC_T00019651001	A0A068U9J3	Hypothetical protein	GO:0016021		-2.36363149948551	0.000509819820596962
Cc05_g12370	GSCOC_T00021199001	A0A068UC81	Protochlorophyllide reductase, chloroplastic	GO:0009507;GO:0016630;GO:0015995;GO:0015979	AT5G54190	-2.36274040028042	7.90517761827836e-06
Cc03_g10830	GSCOC_T00042014001	A0A068V1X5	Putative P-loop containing nucleoside triphosphate hydrolases superfamily protein	GO:0005524		-2.36190015646122	0.00388035723582692
Cc02_g02190	GSCOC_T00020066001	A0A068U988	Putative Anthocyanidin 5,3-O-glucosyltransferase	GO:0016021;GO:0008168;GO:0003676;GO:0032259	AT3G16520	-2.35937445600064	0.00129616110528759
Cc02_g18340	GSCOC_T00014374001	A0A068TLB9	Putative Polyneuridine-aldehyde esterase		AT3G50440	-2.35922715575838	0.00163601554489124
Cc01_g07830	GSCOC_T00015458001	A0A068V4W9	Putative Protein FAF-like, chloroplastic	GO:0005783;GO:0005634;GO:0019902;GO:0047485;GO:0009788;GO:0042326;GO:0010922	AT5G22090	-2.35749692797393	0.00424925238398371
Cc10_g00110	GSCOC_T00024447001	A0A068UFL2	Cysteine/Histidine-rich C1 domain family protein	GO:0008270		-2.35597982542726	0.000963976865901651
Cc00_g35820	GSCOC_T00013517001	A0A068VNT7	CMV 1a interacting protein 1			-2.35555686475661	0.00401245039269563
Cc03_g12940	GSCOC_T00030634001	A0A068UR06	Hypothetical protein			-2.35331235482522	0.000198836647439661
Cc10_g16420	GSCOC_T00013398001	A0A068VE59	Putative uncharacterized protein	GO:0016021		-2.3523060994061	0.000198136832364298
Cc00_g13830	GSCOC_T00007200001	A0A068VGH3	Axial regulator YABBY 1	GO:0007275	AT2G45190	-2.35091208038323	2.10319827227751e-05
Cc00_g32010	GSCOC_T00012890001	A0A068VME5	Thioredoxin H2	GO:0015035;GO:0045454;GO:0006662	AT5G39950	-2.34563099693957	0.000393443607857557
Cc02_g34260	GSCOC_T00000663001	A0A068V9B3	Putative Acetylajmalan esterase	GO:0016021;GO:0016788		-2.34339387668883	0.00476009265565259
Cc03_g08180	GSCOC_T00033213001	A0A068US84	Putative UPF0481 protein At3g47200	GO:0016021		-2.34095710693988	0.000488498398436022
Cc08_g09780	GSCOC_T00026929001	A0A068UIV6	Protein of unknown function (DUF1677)			-2.34028105240228	0.00126725962425963
Cc04_g03050	GSCOC_T00021993001	A0A068TQ21	Photosystem I reaction center subunit VI, chloroplastic	GO:0009538;GO:0015979	AT3G16140	-2.34026774332878	0.000605753369787899
Cc06_g04020	GSCOC_T00023706001	A0A068UE68	Adenosine kinase 2	GO:0004001;GO:0006166	AT5G03300	-2.33817170538395	5.75088759039446e-09
Cc01_g16150	GSCOC_T00016475001	A0A068U623	Putative Bifunctional inhibitor/lipid-transfer protein/seed storage 2S albumin superfamily protein	GO:0005504;GO:0009627	AT5G48485	-2.33595110594394	0.000151091648158368
Cc04_g04950	GSCOC_T00022234001	A0A068TQN4	Putative Zinc finger protein 3		AT5G25160	-2.33422474443971	9.65126191173961e-06
Cc05_g08950	GSCOC_T00016936001	A0A068V636	Putative G-type lectin S-receptor-like serine/threonine-protein kinase SD2-5	GO:0016021;GO:0005524;GO:0004674	AT2G19130	-2.33384134160429	0.00472045785451993
Cc06_g12950	GSCOC_T00041469001	A0A068U5W8	Putative Uncharacterized membrane protein At1g06890	GO:0016021	AT5G57100	-2.3332268431779	1.79900442716904e-06
Cc02_g04030	GSCOC_T00020306001	A0A068UAU4	EXORDIUM like 3	GO:0009505;GO:0009506;GO:0080167	AT5G51550	-2.33215420905622	6.82910509817678e-07
Cc07_g07030	GSCOC_T00040036001	A0A068U4R4	Calcium-transporting ATPase 2, plasma membrane-type	GO:0016021;GO:0005524;GO:0005388;GO:0005516	AT4G37640	-2.33213934557393	4.66173226449627e-05
Cc00_g17060	GSCOC_T00008777001	A0A068VHV0	Probable xyloglucan endotransglucosylase/hydrolase protein 28	GO:0048046;GO:0005618;GO:0004553;GO:0016762;GO:0042546;GO:0071555;GO:0010411	AT1G14720	-2.32926033978376	5.63596971208777e-06
Cc02_g14570	GSCOC_T00013870001	A0A068TN32	GDSL esterase/lipase At1g28580	GO:0016788	AT1G28580	-2.32878725578124	1.03131496065099e-05
Cc00_g05810	GSCOC_T00012073001	A0A068VDV7	Hypothetical protein		AT5G54160	-2.32661904845077	0.00297926015250758
Cc01_g20900	GSCOC_T00005046001	A0A068VBR9	Putative S-adenosyl-L-methionine-dependent methyltransferases superfamily protein	GO:0008168;GO:0032259		-2.32649853709575	7.63317095316086e-06
Cc08_g17000	GSCOC_T00035679001	A0A068UUQ7	Hypothetical protein	GO:0016021	AT4G11370	-2.32648545774317	0.00168565079951376
Cc04_g16320	GSCOC_T00035718001	A0A068UUS7	NDH dependent flow 6	GO:0009535;GO:0010598;GO:0009773	AT1G18730	-2.3261724815643	0.000519220552824418
Cc03_g10270	GSCOC_T00031037001	A0A068UPV2	Putative cytochrome BC1 synthesis	GO:0005524	AT3G50930	-2.32465321946233	0.000690203417280376
Cc06_g23860	GSCOC_T00040504001	A0A068V0S0	Protein kinase superfamily protein	GO:0005524;GO:0004674	AT2G07180	-2.32160776974804	8.82573172403415e-05
Cc03_g03670	GSCOC_T00026062001	A0A068TUM3	Primary amine oxidase	GO:0005507;GO:0008131;GO:0048038;GO:0009308	AT4G14940	-2.31813622581057	0.000760276155172132
Cc09_g02390	GSCOC_T00017684001	A0A068U823	Putative Uncharacterized CDP-alcohol phosphatidyltransferase class-I family protein C22A12.08c			-2.31544927165966	0.000847161676349918
Cc02_g36780	GSCOC_T00003879001	A0A068VAE0	Endoglucanase 25	GO:0009504;GO:0005769;GO:0016021;GO:0005886;GO:0005802;GO:0008810;GO:0030244;GO:0030245;GO:0043622;GO:0042538;GO:0009735;GO:0048367;GO:0009826	AT5G49720	-2.31425319660193	1.39744522956502e-05
Cc03_g15530	GSCOC_T00026838001	A0A068UI14	Putative Predicted protein		AT4G13830	-2.31339787049563	0.00140717059891431
Cc03_g15190	GSCOC_T00026785001	A0A068UIG5	Putative UDP-glycosyltransferase 74E1	GO:0008194	AT1G05675	-2.31195784908826	0.00211217783785341
Cc10_g05470	GSCOC_T00034802001	A0A068TZ97	Protein of unknown function (DUF620)			-2.3096032911646	5.6166697596575e-08
Cc11_g09680	GSCOC_T00032688001	A0A068TWQ0	Hypothetical protein	GO:0016021		-2.30603727173597	0.000468439684507649
Cc06_g07980	GSCOC_T00031190001	A0A068US50	Actin-depolymerizing factor 6	GO:0015629;GO:0003779;GO:0030042	AT2G31200	-2.30264685753488	7.62548579091278e-05
Cc01_g13550	GSCOC_T00028324001	A0A068UND2	Copper transporter 1	GO:0016021;GO:0005375;GO:0006878	AT5G59030	-2.30186178175463	0.00606550780629617
Cc06_g15950	GSCOC_T00030754001	A0A068UPB2	Probable plastid-lipid-associated protein 13, chloroplastic		AT2G42130	-2.30026624037544	3.09098551168964e-06
Cc11_g08270	GSCOC_T00032900001	A0A068TXN2	inorganic carbon transport protein-related	GO:0016021;GO:0016655	AT1G70760	-2.29940263681837	0.00195539787149507
Cc02_g08120	GSCOC_T00029843001	A0A068TUT5	ACT domain-containing protein		AT2G39570	-2.2954962760549	2.2762433900996e-10
Cc11_g01180	GSCOC_T00019614001	A0A068U8P4	Putative UDP-rhamnose	GO:0016021;GO:0008194	AT2G22590	-2.29460973010576	2.0692438170866e-06
Cc11_g15110	GSCOC_T00001014001	A0A068VDQ3	Predicted protein	GO:0009507	AT3G26740	-2.29049762619389	0.00105474044644404
Cc02_g35270	GSCOC_T00042873001	A0A068V394	Protein of unknown function, DUF538			-2.28486003340397	0.000102344706864062
Cc08_g03110	GSCOC_T00037821001	A0A068UWZ1	Putative uncharacterized protein	GO:0005634;GO:0003677	AT1G22640	-2.28455647554058	0.00176247390049566
Cc00_g18540	GSCOC_T00008824001	A0A068VIB3	Cytochrome P450 71A4	GO:0020037;GO:0005506;GO:0004497;GO:0016705	AT3G48280	-2.28129643872394	8.21872626995799e-05
Cc03_g11110	GSCOC_T00042068001	A0A068V2D4	Hypothetical protein			-2.27988180788654	1.05921714953169e-10
Cc05_g12060	GSCOC_T00021236001	A0A068UE57	Metallothionein-like protein type 3		AT3G15353	-2.27552632930346	3.19442413448622e-05
Cc00_g14150	GSCOC_T00009209001	A0A068VJX3	Protein COBRA	GO:0031225;GO:0010215	AT5G60920	-2.27449722008716	4.19852963609804e-06
Cc02_g09330	GSCOC_T00029668001	A0A068TVD5	Core-2/I-branching beta-1,6-N-acetylglucosaminyltransferase family protein	GO:0016020		-2.2738667366392	0.00598404096420616
Cc06_g08940	GSCOC_T00041984001	A0A068U5E8	Putative Plant Tudor-like RNA-binding protein		AT3G12140	-2.27279988346471	4.96407216820688e-05
Cc04_g06590	GSCOC_T00022450001	A0A068TSQ1	Beta-glucosidase 44	GO:0004553;GO:0005975	AT3G18080	-2.27105563271734	0.000160188656133962
Cc06_g16950	GSCOC_T00004152001	A0A068VDL2	G-type lectin S-receptor-like serine/threonine-protein kinase SD3-1	GO:0016021;GO:0005524;GO:0004674;GO:0048544		-2.27098928807988	0.00837421867185167
Cc00_g23900	GSCOC_T00012446001	A0A068VJP6	Serine carboxypeptidase-like 18	GO:0004185	AT1G73300	-2.26850255233843	3.8475374953136e-06
Cc05_g12890	GSCOC_T00021130001	A0A068UBA7	G-type lectin S-receptor-like serine/threonine-protein kinase At4g27290	GO:0016021;GO:0005524;GO:0004674;GO:0048544	AT4G27290	-2.26765186241558	4.28169368334398e-06
Cc00_g14590	GSCOC_T00012537001	A0A068VGR1	Rhodanese-like domain-containing protein 9, chloroplastic	GO:0016021	AT2G42220	-2.2667829927759	1.35526391211989e-05
Cc08_g05240	GSCOC_T00042427001	A0A068V2P5	Protein PAM68, chloroplastic	GO:0009507;GO:0016021;GO:0010207	AT4G19100	-2.26556203730625	0.00149438896745335
Cc04_g04710	GSCOC_T00022204001	A0A068TPI5	Sterile alpha motif (SAM) domain-containing protein			-2.26525385048323	0.00553397435344987
Cc06_g04230	GSCOC_T00023732001	A0A068UET3	Putative Heavy metal transport/detoxification superfamily protein	GO:0046872;GO:0030001;GO:0046872;GO:0030001	AT2G36950	-2.26394776574115	0.000138194239595523
Cc02_g15880	GSCOC_T00014054001	A0A068TLS4	Hypothetical protein	GO:0004869		-2.26255132159042	2.69795879502444e-06
Cc08_g03150	GSCOC_T00037829001	A0A068UXS7	Alpha,alpha-trehalose-phosphate synthase [UDP-forming] 5	GO:0003824;GO:0005992	AT4G17770	-2.25978435026794	4.2987082446536e-05
Cc11_g14320	GSCOC_T00032072001	A0A068TW28	Nucleobase-ascorbate transporter 7	GO:0016021;GO:0022857	AT1G60030	-2.2580429148671	0.000559456578959963
Cc07_g07940	GSCOC_T00040156001	A0A068U3I4	Serine hydroxymethyltransferase 1, mitochondrial	GO:0004372;GO:0030170;GO:0019264;GO:0035999	AT4G37930	-2.25605011701888	0.000594938918055888
Cc04_g08070	GSCOC_T00022655001	A0A068TQI6	Tropinone reductase homolog At1g07440	GO:0016491	AT5G06060	-2.25397832167384	0.000980230732660839
Cc05_g08160	GSCOC_T00016828001	A0A068V552	Predicted protein	GO:0008168		-2.25308663205369	0.000182087792190743
Cc10_g03230	GSCOC_T00024846001	A0A068UIU7	PPPDE putative thiol peptidase family protein		AT4G17486	-2.25262548150666	0.00028234328712183
Cc02_g20400	GSCOC_T00014653001	A0A068TM92	Malate dehydrogenase, glyoxysomal	GO:0030060;GO:0005975;GO:0006108;GO:0006099	AT2G22780	-2.25170641903122	6.12649758244682e-05
Cc01_g18770	GSCOC_T00016157001	A0A068U6D1	Magnesium transporter MRS2-I	GO:0016021;GO:0006811	AT5G64560	-2.24946178450987	9.26965567650097e-10
Cc01_g21940	GSCOC_T00004918001	A0A068V939	Putative uncharacterized protein			-2.24937023559367	1.74109170489271e-05
Cc02_g04690	GSCOC_T00020388001	A0A068UA00	Putative WD repeat-containing protein WRAP73			-2.24840772980725	0.00210262975645207
Cc02_g05510	GSCOC_T00039062001	A0A068UZF3	unknown protein; Has 39 Blast hits to 39 proteins in 15 species			-2.24816851652066	0.000657431843555515
Cc05_g14870	GSCOC_T00038767001	A0A068UZS5	unknown protein; FUNCTIONS IN	GO:0016021		-2.24732024412741	4.57745166279133e-08
Cc01_g14570	GSCOC_T00028463001	A0A068UL41	Probable phytol kinase 2, chloroplastic	GO:0016021	AT5G58560	-2.24691049127502	0.000249612161499665
Cc01_g19350	GSCOC_T00016069001	A0A068U566	Plant protein of unknown function (DUF868)			-2.24200146960141	0.00371739845583627
Cc05_g00350	GSCOC_T00017064001	A0A068V6A5	Putative Acidic endochitinase			-2.23884443137397	3.59097512556437e-05
Cc10_g13040	GSCOC_T00035350001	A0A068UUL6	Putative Cyanidin-3-O-glucoside 2-O-glucuronosyltransferase	GO:0008194	AT2G29750	-2.23882295267062	9.42906001740828e-05
Cc02_g16300	GSCOC_T00014112001	A0A068TL28	Subtilisin-like protease	GO:0004252	AT4G34980	-2.23831104597111	1.58881585057343e-06
Cc11_g14950	GSCOC_T00001038001	A0A068VE30	Peptidyl-prolyl cis-trans isomerase	GO:0009535;GO:0031977;GO:0003755	AT5G13410	-2.23775252064326	1.38187890884632e-05
Cc11_g14710	GSCOC_T00032021001	A0A068TXU7	Hypothetical protein			-2.23663885923797	1.59857124058451e-05
Cc07_g01130	GSCOC_T00019201001	A0A068V7K2	Acyltransferase-like protein At3g26840, chloroplastic	GO:0016747	AT3G26840	-2.23373570457193	7.53339285805398e-09
Cc01_g08200	GSCOC_T00015513001	A0A068V4L6	Putative Probable leucine-rich repeat receptor-like protein kinase At5g49770	GO:0016021;GO:0005524;GO:0004672	AT5G49770	-2.23244354347783	0.00254395113940399
Cc01_g11670	GSCOC_T00028073001	A0A068UK67	Putative Dof zinc finger protein DOF2.1	GO:0005634;GO:0003677;GO:0006355	AT5G60200	-2.23147772637113	0.000157987256004936
Cc07_g14060	GSCOC_T00036660001	A0A068U1T5	nicotinamidase 1	GO:0008936;GO:0019365;GO:0009737	AT2G22570	-2.22906255708982	2.68965426647927e-05
Cc07_g10920	GSCOC_T00037058001	A0A068U0M9	Putative Rhodanese-like domain-containing protein 17		AT2G17850	-2.22772221255968	0.00966864354761001
Cc06_g15590	GSCOC_T00030801001	A0A068URG7	Putative Disease resistance response protein 206	GO:0048046	AT1G58170	-2.22692520967592	0.00446606382428856
Cc02_g00580	GSCOC_T00019842001	A0A068U9T8	UP-9A	GO:0098869	AT5G24660	-2.22520820794407	0.00566146839624168
Cc00_g16250	GSCOC_T00009567001	A0A068VI25	Hypothetical protein	GO:0007623;GO:0006355	AT3G54500	-2.22446426569863	2.81847677300806e-06
Cc05_g06070	GSCOC_T00035214001	A0A068UUG6	Protein THYLAKOID FORMATION1, chloroplastic	GO:0010207	AT2G20890	-2.22371461280354	0.000112768105581782
Cc03_g10910	GSCOC_T00042031001	A0A068V2B1	Cytochrome P450 71A2	GO:0020037;GO:0005506;GO:0004497;GO:0016705	AT3G48310	-2.22108330780883	0.000147240594143876
Cc08_g02680	GSCOC_T00037749001	A0A068UXI4	Carboxylesterase 1	GO:0016787	AT5G62180	-2.22024263124299	1.51882564150832e-08
Cc02_g16090	GSCOC_T00014084001	A0A068TKR4	Monothiol glutaredoxin-S2	GO:0009055;GO:0015035	AT5G18600	-2.21946252865514	7.28315348935458e-05
Cc08_g16430	GSCOC_T00035604001	A0A068UX74	Hypothetical protein			-2.21943930485718	1.41427198767736e-05
Cc05_g12390	GSCOC_T00021196001	A0A068UBF1	Protein of unknown function (DUF1218)	GO:0016021		-2.21649757406745	0.000350097596877846
Cc05_g08440	GSCOC_T00016866001	A0A068V7Q5	Phospholipase A1-IIdelta	GO:0008970;GO:0006629	AT2G42690	-2.21351264414556	2.23665175638353e-06
Cc06_g00570	GSCOC_T00023239001	A0A068UD44	Cationic peroxidase 1	GO:0020037;GO:0046872;GO:0004601;GO:0042744;GO:0006979	AT1G14550	-2.21314501305744	0.000594608998202342
Cc07_g12630	GSCOC_T00036849001	A0A068TZR0	Putative P-loop containing nucleoside triphosphate hydrolases superfamily protein			-2.21289193629336	0.00508146447328014
Cc00_g00880	GSCOC_T00041138001	A0A068V208	Putative P-loop containing nucleoside triphosphate hydrolases superfamily protein	GO:0005524		-2.21139274799287	0.000764362987112873
Cc00_g03730	GSCOC_T00013259001	A0A068VBZ1	Protein SRG1	GO:0046872;GO:0016491	AT1G17020	-2.20989351521044	8.45548479362267e-07
Cc07_g00250	GSCOC_T00019091001	A0A068V7V8	Putative Estradiol 17-beta-dehydrogenase 12		AT1G67730	-2.20910945198197	0.00378231351235743
Cc07_g13720	GSCOC_T00036703001	A0A068TZX3	Geraniol dehydrogenase 1	GO:0016491;GO:0008270	AT4G37970	-2.20870194784659	0.00449027709847365
Cc02_g39880	GSCOC_T00027649001	A0A068UJI7	CBL-interacting serine/threonine-protein kinase 9	GO:0005524;GO:0004674;GO:0007165	AT1G01140	-2.20789174796668	4.55105833717796e-10
Cc06_g21490	GSCOC_T00008017001	A0A068VCH5	Putative Cation/calcium exchanger 1	GO:0016021;GO:0055085	AT5G17860	-2.2062899175882	0.00764021388372548
Cc07_g07600	GSCOC_T00040110001	A0A068U292	Hypothetical protein	GO:0016021		-2.20505665530707	6.65573952935115e-05
Cc10_g14260	GSCOC_T00012016001	A0A068VCJ0	Pathogen-related protein			-2.20398662495289	0.00639699864940296
Cc05_g12730	GSCOC_T00021152001	A0A068UBK0	Cyclic nucleotide-gated ion channel 4	GO:0016021;GO:0005216	AT5G54250	-2.20313605167204	7.92968337488316e-06
Cc02_g17640	GSCOC_T00014284001	A0A068TL54	Mitochondrial transcription termination factor family protein	GO:0009507;GO:0042646;GO:0003690;GO:0071472;GO:0006355		-2.20044987067498	0.00273177058787466
Cc02_g34790	GSCOC_T00011786001	A0A068VCE1	Putative unknown protein; BEST Arabidopsis thaliana protein match is			-2.19996820343799	0.00113997819088513
Cc06_g10220	GSCOC_T00041815001	A0A068U466	Putative Probable glycosyltransferase At3g07620	GO:0016021;GO:0016757;GO:0006486	AT5G03795	-2.19883714377644	0.00112691171932432
Cc02_g28910	GSCOC_T00018191001	A0A068V8V7	Serine carboxypeptidase-like 40	GO:0004185	AT3G63470	-2.19526754658674	0.00066212225571942
Cc09_g01120	GSCOC_T00017852001	A0A068U7G0	Putative RING/U-box superfamily protein			-2.19227412432707	0.0022720366305166
Cc10_g02730	GSCOC_T00024780001	A0A068UIQ1	RAD-like 1	GO:0005634;GO:0003677	AT1G75250	-2.19054081365237	0.00199229475314583
Cc02_g14400	GSCOC_T00013848001	A0A068TKP3	IQ-domain 9	GO:0005886	AT1G74690	-2.18877944263866	0.000146738135383647
Cc05_g09820	GSCOC_T00021535001	A0A068UD11	Glucose-1-phosphate adenylyltransferase small subunit, chloroplastic	GO:0009507;GO:0005524;GO:0008878;GO:0005978;GO:0019252	AT5G48300	-2.18841456749298	0.000275189514224718
Cc02_g05260	GSCOC_T00039029001	A0A068UZC8	Rhodanese-like domain-containing protein 7		AT2G40760	-2.18804224070087	8.21306124583247e-05
Cc01_g04150	GSCOC_T00039285001	A0A068V2H0	Calcium-dependent lipid-binding (CaLB domain) plant phosphoribosyltransferase family protein	GO:0016021	AT3G57880	-2.18718598589319	0.000279892500464202
Cc11_g10600	GSCOC_T00032557001	A0A068TXB6	Serine/threonine-protein kinase STN7, chloroplastic	GO:0005524;GO:0004674	AT1G68830	-2.18693193427656	3.13400401158721e-08
Cc09_g07220	GSCOC_T00036294001	A0A068UY95	Bifunctional dihydrofolate reductase-thymidylate synthase	GO:0004146;GO:0046654	AT2G16370	-2.18650672409348	0.000450688566151307
Cc05_g06750	GSCOC_T00042185001	A0A068V4H3	Thylakoid lumenal protein At1g03610, chloroplastic	GO:0009543;GO:0009535;GO:0071484;GO:0010207;GO:0010206	AT1G03600	-2.18545225898319	0.000539281841899265
Cc02_g11930	GSCOC_T00029355001	A0A068TUS6	Putative uncharacterized protein	GO:0070300;GO:0004674;GO:0046777		-2.18514917012981	0.000369480169388152
Cc06_g12610	GSCOC_T00041515001	A0A068U3Y2	Peroxiredoxin Q, chloroplastic	GO:0004601;GO:0051920		-2.18356140949323	0.00163888249203845
Cc11_g08610	GSCOC_T00032849001	A0A068TZJ5	Serine carboxypeptidase-like 50	GO:0004185	AT1G15000	-2.18280967816259	0.000149503167284526
Cc08_g01650	GSCOC_T00038353001	A0A068V0K2	Putative Disease resistance protein RPM1	GO:0043531;GO:0006952		-2.1812222890228	0.000246050056180583
Cc10_g01850	GSCOC_T00024674001	A0A068UFS4	ATP sulfurylase 2	GO:0009570;GO:0005829;GO:0004781;GO:0009970;GO:0000103	AT1G19920	-2.18097198731305	6.60630656600605e-07
Cc03_g10380	GSCOC_T00031054001	A0A068URV5	cytochrome BC1 synthesis	GO:0005524	AT3G50930	-2.17918727033252	0.000885492669740917
Cc00_g13430	GSCOC_T00003238001	A0A068VH18	Receptor-like protein kinase FERONIA	GO:0016021;GO:0005524;GO:0004672	AT3G51550	-2.17619903903189	0.000409518605369466
Cc07_g04390	GSCOC_T00039695001	A0A068U2D1	Putative Receptor-like protein kinase FERONIA	GO:0005524;GO:0004672	AT3G51550	-2.17584751378222	0.00334985059548292
Cc11_g12420	GSCOC_T00032318001	A0A068TWG6	Putative Uncharacterized protein At5g01610		AT5G01610	-2.1745127700496	1.14102932537209e-05
Cc07_g10550	GSCOC_T00037101001	A0A068U164	Putative Protein BASIC PENTACYSTEINE6		AT5G42520	-2.16445648968622	0.00176247390049566
Cc06_g11320	GSCOC_T00041672001	A0A068U3W5	Alkaline-phosphatase-like family protein	GO:0016021;GO:0003824		-2.16232863156311	0.000210991157316899
Cc06_g00880	GSCOC_T00023291001	A0A068UDS8	Putative Mitoferrin	GO:0016021;GO:0005347		-2.16171032605394	5.25962955499151e-07
Cc00_g00160	GSCOC_T00036092001	A0A068UXX4	Putative Protein of unknown function (DUF581)		AT1G22160	-2.16131021132966	6.77488341510393e-05
Cc01_g21350	GSCOC_T00004990001	A0A068VBL9	Putative RING/FYVE/PHD zinc finger superfamily protein	GO:0016021;GO:0008270		-2.16050347127893	3.21221706794809e-05
Cc11_g13710	GSCOC_T00032148001	A0A068TY44	Glutathione S-transferase U17		AT1G10370	-2.15890177060975	1.03570063659244e-05
Cc10_g01120	GSCOC_T00024578001	A0A068UGD4	Thioredoxin-like protein CDSP32, chloroplastic	GO:0009941;GO:0009570;GO:0045454	AT1G76080	-2.15814387674042	7.0449153531423e-05
Cc07_g12330	GSCOC_T00036888001	A0A068TZT3	unknown protein; FUNCTIONS IN	GO:0016021		-2.15714918466496	0.000141718368741042
Cc07_g01740	GSCOC_T00039350001	A0A068U1M0	Hypothetical protein			-2.1544193401568	8.5758763305429e-05
Cc02_g39450	GSCOC_T00027714001	A0A068UKD1	Putative Protein ASPARTIC PROTEASE IN GUARD CELL 1	GO:0004190	AT1G01300	-2.15413893075672	0.000495489311168795
Cc08_g02930	GSCOC_T00037794001	A0A068UXL1	Putative E3 ubiquitin-protein ligase Os04g0590900	GO:0016021		-2.15332677417533	0.00879339107880488
Cc08_g03960	GSCOC_T00034196001	A0A068UU27	Phosphoribulokinase, chloroplastic	GO:0005524;GO:0008974;GO:0005975	AT1G32060	-2.1526120933225	0.000922631775893011
Cc06_g09470	GSCOC_T00041911001	A0A068U4C7	Putative Serine incorporator 3	GO:0016021		-2.15168215891209	0.000425616292962833
Cc08_g08910	GSCOC_T00017228001	A0A068V896	Putative BURP domain-containing protein 5		AT5G25610	-2.14833363605675	0.000203945646070906
Cc06_g03900	GSCOC_T00023688001	A0A068UEY9	Aquaporin PIP2-2	GO:0016021;GO:0015267	AT2G37170	-2.14764739905044	0.00159233650145979
Cc03_g05800	GSCOC_T00026349001	A0A068TSQ9	Long-chain-alcohol oxidase FAO1	GO:0016020;GO:0050660;GO:0046577	AT3G23410	-2.14521204214585	8.58099004368295e-05
Cc01_g13360	GSCOC_T00028301001	A0A068ULJ4	plastid transcriptionally active 16		AT3G46780	-2.14402148836865	1.33889803735269e-06
Cc01_g18730	GSCOC_T00016162001	A0A068U804	Probable WRKY transcription factor 21	GO:0005634;GO:0003700;GO:0043565	AT2G30590	-2.14373723633721	1.3786928917351e-05
Cc03_g15260	GSCOC_T00026796001	A0A068UIP7	Putative Reticuline oxidase-like protein	GO:0071949;GO:0016491	AT4G20820	-2.14258757501599	0.00213820327326118
Cc02_g03410	GSCOC_T00020225001	A0A068UAF4	TraB family protein			-2.14241802472326	3.06736008464182e-05
Cc05_g08090	GSCOC_T00016820001	A0A068V7M7	Putative Uncharacterized protein HI_0077			-2.1406302873222	7.25459072450424e-05
Cc05_g08150	GSCOC_T00016827001	A0A068V5W2	Putative uncharacterized protein OSJNBa0095J15.6			-2.1307473778635	0.000418604169773142
Cc10_g09590	GSCOC_T00031523001	A0A068UQP3	Hypothetical protein	GO:0004869		-2.1288519731149	0.000547348619107599
Cc02_g19720	GSCOC_T00014546001	A0A068TPI6	LOB domain-containing protein, putative		AT4G37540	-2.12454917885233	0.000101484477742558
Cc09_g07970	GSCOC_T00003785001	A0A068V9U7	Putative Lysosomal alpha-mannosidase	GO:0004559;GO:0030246;GO:0046872;GO:0006013	AT5G13980	-2.12450259250519	0.0014248512755892
Cc11_g14690	GSCOC_T00032023001	A0A068TV59	Polygalacturonase-1 non-catalytic subunit beta		AT1G70370	-2.1231736908539	0.00103910895285592
Cc01_g14680	GSCOC_T00028476001	A0A068ULC9	Protein of unknown function (DUF640)		AT1G07090	-2.12163398654482	8.02093318355546e-07
Cc07_g10820	GSCOC_T00037068001	A0A068U0N7	Ferredoxin--NADP reductase, leaf-type isozyme, chloroplastic	GO:0009507;GO:0004324	AT1G20020	-2.11944523526393	0.00309293592336433
Cc08_g12850	GSCOC_T00030422001	A0A068UNU0	Putative uncharacterized protein			-2.11943145647826	2.3409129054822e-06
Cc07_g04320	GSCOC_T00039686001	A0A068U1Z1	Putative unknown protein; BEST Arabidopsis thaliana protein match is	GO:0051513		-2.11797991938223	0.00478366284209033
Cc09_g01760	GSCOC_T00017767001	A0A068U7W1	Uncharacterized GPI-anchored protein At1g61900	GO:0005886;GO:0009506	AT1G61900	-2.11794293061965	1.40702800059019e-05
Cc11_g01970	GSCOC_T00033046001	A0A068UTU8	Putative Probable disease resistance protein At1g58390	GO:0043531;GO:0006952		-2.11629325630586	0.00187528310357083
Cc07_g06680	GSCOC_T00039985001	A0A068U4M6	Arabinogalactan			-2.11563974654884	0.00190414949603146
Cc11_g11440	GSCOC_T00032445001	A0A068TW07	UDP-glycosyltransferase 89A2	GO:0008194	AT5G03490	-2.11172656794655	8.90300130302498e-05
Cc06_g01320	GSCOC_T00023347001	A0A068UDA9	Phosphoinositide phospholipase C 2	GO:0004435;GO:0035556;GO:0016042	AT3G08510	-2.11027515273473	1.81345185220513e-07
Cc11_g05150	GSCOC_T00020456001	A0A068UAV7	G-type lectin S-receptor-like serine/threonine-protein kinase At4g27290	GO:0016021;GO:0005524;GO:0004672;GO:0048544	AT4G27290	-2.11011878306229	0.000619249258833203
Cc04_g01110	GSCOC_T00021745001	A0A068TNB8	Lung seven transmembrane receptor family protein	GO:0016021		-2.10701983438492	0.000468792309500282
Cc08_g16170	GSCOC_T00035569001	A0A068UV54	GDSL esterase/lipase At4g10955	GO:0006629	AT4G10955	-2.10457325533056	0.00209115117792615
Cc00_g11790	GSCOC_T00007740001	A0A068VFZ6	Putative Predicted protein			-2.10302333600843	0.00419626701029976
Cc00_g11250	GSCOC_T00011610001	A0A068VFR2	ABC transporter C family member 2	GO:0016021;GO:0005524;GO:0016887;GO:0042626	AT2G34660	-2.10118381447717	0.00016304694584155
Cc06_g06420	GSCOC_T00031384001	A0A068UQT5	Double Clp-N motif-containing P-loop nucleoside triphosphate hydrolases superfamily protein			-2.09819463547406	0.00988877794679236
Cc02_g01190	GSCOC_T00019930001	A0A068U8Y7	Protein yippee-like At4g27745	GO:0046872	AT4G27745	-2.09571112610967	0.0080451097999577
Cc02_g22710	GSCOC_T00014948001	A0A068TNI0	Potassium channel AKT2/3	GO:0016021;GO:0005249;GO:0034765	AT4G22200	-2.09479486868479	4.06619070531028e-05
Cc10_g07920	GSCOC_T00034463001	A0A068TYI0	Ergosterol biosynthetic protein 28	GO:0016021	AT1G10030	-2.09364518501782	0.000368534393285569
Cc07_g07640	GSCOC_T00040115001	A0A068U3D3	LRR receptor-like serine/threonine-protein kinase HSL2	GO:0016021;GO:0005524;GO:0004672	AT5G65710	-2.09312221183724	6.79162637173324e-06
Cc01_g17500	GSCOC_T00016317001	A0A068U5R5	Photosystem I reaction center subunit IV A, chloroplastic	GO:0009538;GO:0015979	AT2G20260	-2.09311384749047	0.00124914417627009
Cc08_g01690	GSCOC_T00038346001	A0A068UYT6	Putative uncharacterized protein			-2.08653050946799	0.00186938277647436
Cc04_g08250	GSCOC_T00022680001	A0A068TRH1	Putative Dof zinc finger protein DOF5.4	GO:0005634;GO:0003677;GO:0006355	AT5G60850	-2.08643541833121	0.000184699493777069
Cc06_g03030	GSCOC_T00023573001	A0A068UEH0	Putative Auxin-induced protein 5NG4	GO:0016021;GO:0022857	AT2G37460	-2.08124300759629	0.00846887791501858
Cc06_g16970	GSCOC_T00004154001	A0A068VDN0	MATE efflux family protein 1	GO:0016021;GO:0015297;GO:0042910	AT1G51340	-2.08079246803168	0.0031546113668451
Cc02_g08740	GSCOC_T00029755001	A0A068TXB4	unknown protein; FUNCTIONS IN			-2.0802829570948	1.18517245843518e-05
Cc03_g04120	GSCOC_T00026120001	A0A068TUR9	Putative Protein XRI1	GO:0007143;GO:0007140	AT5G48720	-2.07976965013339	0.00202966420669743
Cc04_g10770	GSCOC_T00042647001	A0A068V3K1	Putative Probable receptor-like protein kinase At1g67000	GO:0016021;GO:0005524;GO:0004674	AT1G66920	-2.07724481749593	0.00517942856242993
Cc09_g01650	GSCOC_T00017780001	A0A068U9W5	ATP synthase gamma chain, chloroplastic	GO:0045261;GO:0046933;GO:0015986	AT4G04640	-2.07338268820809	0.000753554799579836
Cc11_g15880	GSCOC_T00038114001	A0A068UY79	GDSL esterase/lipase At3g26430	GO:0016788	AT3G26430	-2.07197944487096	3.997103533971e-06
Cc11_g13530	GSCOC_T00032170001	A0A068TVL7	Nitrate transporter 1.2	GO:0016021;GO:0022857	AT1G69850	-2.07150383092826	0.000657431843555515
Cc01_g20300	GSCOC_T00015950001	A0A068U4V5	Protein TRANSPORT INHIBITOR RESPONSE 1		AT3G62980	-2.07116129600503	3.5126638930029e-05
Cc02_g09360	GSCOC_T00029663001	A0A068TUK6	Putative bZIP protein		AT3G58120	-2.07101315114845	0.00119423781383992
Cc01_g12820	GSCOC_T00028232001	A0A068UKH8	Fasciclin-like arabinogalactan protein 4	GO:0016021	AT3G46550	-2.06990504911303	0.000806561122743932
Cc09_g03800	GSCOC_T00017501001	A0A068U9D5	Thioredoxin F, chloroplastic	GO:0045454	AT5G16400	-2.06804789007862	0.000481449954356604
Cc02_g06960	GSCOC_T00039252001	A0A068UZU5	Sedoheptulose-1,7-bisphosphatase, chloroplastic	GO:0048046;GO:0009941;GO:0009570;GO:0009579;GO:0050278;GO:0042742;GO:0019252;GO:0005986	AT3G55800	-2.06742720514223	0.0060398226918971
Cc08_g00650	GSCOC_T00038486001	A0A068V0U8	Putative uncharacterized protein		AT4G32330	-2.06607507926719	8.45548479362267e-07
Cc07_g06560	GSCOC_T00039971001	A0A068U203	Putative TRICHOME BIREFRINGENCE-LIKE 21	GO:0016021	AT5G15900	-2.06605888856329	5.4549582808393e-05
Cc07_g05350	GSCOC_T00039805001	A0A068U1L2	Oxygen-evolving enhancer protein 1, chloroplastic	GO:0009654;GO:0010242;GO:0010207;GO:0042549	AT3G50820	-2.06558515836927	0.000376787866422528
Cc02_g18970	GSCOC_T00014459001	Q9XGD6	Caffeoyl-CoA O-methyltransferase 1	GO:0008171;GO:0032259	AT4G34050	-2.06500386116803	0.00767756131810739
Cc10_g10160	GSCOC_T00031448001	A0A068UQY8	Dammarenediol II synthase	GO:0016021;GO:0005811;GO:0042300;GO:0000250;GO:0016104	AT1G78960	-2.06170422905732	2.02077295464908e-05
Cc00_g11300	GSCOC_T00007149001	A0A068VFS0	Putative Bark storage protein A	GO:0003824;GO:0009116		-2.06151064423291	9.12944342014996e-05
Cc07_g10350	GSCOC_T00037127001	A0A068U185	Putative GATA transcription factor 5	GO:0005634;GO:0043565;GO:0008270;GO:0006355	AT5G66320	-2.05601394923495	1.32862568231105e-05
Cc04_g07800	GSCOC_T00022617001	A0A068TRC1	Calcium sensing receptor, chloroplastic	GO:0009535;GO:0005739;GO:0071277;GO:0009704;GO:0090333	AT5G23060	-2.05529759381977	1.42048258263532e-05
Cc01_g21470	GSCOC_T00004976001	A0A068V8U3	Putative uncharacterized protein		AT3G62390	-2.05238668311663	1.90914719052014e-05
Cc10_g06760	GSCOC_T00034615001	A0A068TXR0	Alcohol dehydrogenase-like 1	GO:0016021;GO:0016491;GO:0008270	AT1G22430	-2.05165172831312	6.81114208614185e-05
Cc02_g31060	GSCOC_T00011097001	A0A068VHD4	Photosystem II reaction center PsbP family protein	GO:0019898;GO:0016021;GO:0009654;GO:0005509;GO:0015979	AT3G05410	-2.05151134564289	0.00039002604433542
Cc06_g09210	GSCOC_T00041944001	A0A068U4Z0	ABC transporter G family member 32	GO:0016021;GO:0005524;GO:0016887	AT2G26910	-2.05149623551469	0.00503754279133891
Cc01_g16330	GSCOC_T00016455001	A0A068U8K5	Putative Auxin-induced in root cultures protein 12	GO:0016021	AT3G25290	-2.05040329533769	0.0021268406689733
Cc01_g09560	GSCOC_T00024016001	A0A068UEN4	Protein kinase G11A	GO:0005524;GO:0004672		-2.04896816989332	0.00825579425204141
Cc07_g11880	GSCOC_T00036945001	A0A068TZX0	Putative unknown protein; Has 264 Blast hits to 258 proteins in 65 species			-2.04344024433147	0.00439507794259889
Cc00_g02110	GSCOC_T00001848001	A0A068V9N1	Putative Disease resistance protein At4g27190	GO:0043531		-2.04327631614396	0.00454562475469796
Cc02_g06640	GSCOC_T00039206001	A0A068V2A9	Protein yippee-like	GO:0046872	AT3G08990	-2.04299388096822	2.71058892529477e-06
Cc06_g19780	GSCOC_T00013710001	A0A068VHT8	Putative Receptor-like protein kinase FERONIA	GO:0016021;GO:0005524;GO:0004672	AT3G51550	-2.04240630073775	3.04785173006874e-05
Cc00_g32770	GSCOC_T00009826001	A0A068VMV1	Heterodimeric geranylgeranyl pyrophosphate synthase small subunit, chloroplastic	GO:0016740;GO:0008299	AT4G38460	-2.03865351033785	2.35489817263426e-06
Cc02_g03850	GSCOC_T00020286001	A0A068U9Z5	Protein of unknown function (DUF668)	GO:0045927		-2.03765267337936	0.00669332330192023
Cc02_g37510	GSCOC_T00027980001	A0A068UML9	( )-neomenthol dehydrogenase	GO:0016491	AT2G24190	-2.03736388221435	7.81937118341389e-08
Cc01_g05880	GSCOC_T00027415001	A0A068UIV7	Putative Uncharacterized protein At2g37660, chloroplastic			-2.03552169196038	0.00367425350820218
Cc09_g00180	GSCOC_T00017981001	A0A068U7L9	defective in meristem silencing 3	GO:0000419;GO:0042803;GO:0006306;GO:0080188	AT3G49250	-2.03359205678564	0.00189923113450078
Cc04_g06510	GSCOC_T00022440001	A0A068TPX8	Hypothetical protein	GO:0003723	AT3G62800	-2.02897822354767	0.000268046140669291
Cc07_g07650	GSCOC_T00040119001	A0A068U299	Leucine-rich repeat receptor-like serine/threonine-protein kinase BAM1	GO:0016021;GO:0005524;GO:0004672	AT5G65700	-2.02759484244504	0.000177071498444309
Cc11_g07390	GSCOC_T00018058001	A0A068V8P9	Microtubule-associated protein 70-1	GO:0008017;GO:0007010	AT1G68060	-2.02735919951505	1.4436495324602e-05
Cc00_g24320	GSCOC_T00006032001	A0A068VKG0	Putative UDP-rhamnose	GO:0016021;GO:0008194	AT5G49690	-2.02695178818353	0.00156893220503062
Cc06_g15700	GSCOC_T00030787001	A0A068UPE5	DNA-3-methyladenine glycosylase	GO:0003905;GO:0003677;GO:0006284	AT3G12040	-2.02604052483903	0.0013990508069968
Cc09_g00300	GSCOC_T00017965001	A0A068UA90	Putative Probable ADP-ribosylation factor GTPase-activating protein AGD11	GO:0005886;GO:0005773	AT5G47710	-2.02586695794612	3.16879535019359e-05
Cc00_g01420	GSCOC_T00010644001	A0A068VC77	L-type lectin-domain containing receptor kinase IV.1	GO:0016021;GO:0005524;GO:0030246;GO:0004672	AT2G37710	-2.02437716658955	0.00825579425204141
Cc07_g13990	GSCOC_T00036669001	A0A068TZ45	Receptor-like cytosolic serine/threonine-protein kinase RBK1	GO:0005524;GO:0004672	AT5G10520	-2.02219622409591	1.82416405800083e-07
Cc04_g05900	GSCOC_T00022362001	A0A068TQU2	Putative Lysosomal alpha-mannosidase	GO:0004559;GO:0030246;GO:0046872;GO:0006013	AT5G13980	-2.02174166564135	0.000169057559270979
Cc07_g19780	GSCOC_T00033871001	A0A068UT00	Predicted protein	GO:0052689;GO:0009860	AT5G23530	-2.02050249073927	7.68990376671149e-05
Cc02_g38130	GSCOC_T00027903001	A0A068UK18	Glycerol-3-phosphate acyltransferase 4	GO:0016021;GO:0016746	AT4G00400	-2.01578433145772	0.000473528432347689
Cc01_g15140	GSCOC_T00016599001	A0A068U6X9	unknown protein; FUNCTIONS IN			-2.01480059882987	0.000783663648121154
Cc02_g25260	GSCOC_T00028772001	A0A068UM84	Cyclin-U4-1	GO:0019901;GO:0000079	AT2G44740	-2.01433351212462	0.00249448842815581
Cc07_g06010	GSCOC_T00039893001	A0A068U1U9	Zeaxanthin epoxidase, chloroplastic	GO:0009507;GO:0016021;GO:0071949;GO:0009540;GO:0009688	AT5G67030	-2.01306587592182	3.08425344988424e-05
Cc02_g12050	GSCOC_T00029337001	A0A068TUJ3	G-type lectin S-receptor-like serine/threonine-protein kinase At4g03230	GO:0016021;GO:0005524;GO:0004674	AT4G27300	-2.01105660861893	0.00595317645798231
Cc00_g13970	GSCOC_T00010018001	A0A068VH95	Putative Monoglyceride lipase			-2.01075047623339	0.00136737331953474
Cc07_g04900	GSCOC_T00039751001	A0A068U1H1	Predicted protein			-2.01041014801773	0.00664087270133606
Cc02_g34520	GSCOC_T00000703001	A0A068V9N2	Probable protein phosphatase 2C 73	GO:0004722	AT5G27930	-2.01027404950329	1.68316914666781e-06
Cc06_g07440	GSCOC_T00031260001	A0A068UQB7	Putative RING/U-box superfamily protein		AT3G19950	-2.00862098416759	0.00119902370218318
Cc09_g10140	GSCOC_T00041084001	A0A068V221	Putative Protein kinase protein with adenine nucleotide alpha hydrolases-like domain	GO:0005524;GO:0004672	AT1G10620	-2.00785841219806	0.004289940097238
Cc07_g06710	GSCOC_T00039992001	A0A068U214	Putative Sigma factor sigB regulation protein rsbQ		AT4G37470	-2.00569778082672	0.00109724530379193
Cc08_g09370	GSCOC_T00017291001	A0A068V6X1	Probable peptide transporter At1g52190	GO:0016021;GO:0022857	AT1G52190	-2.00543500745593	0.000251458444755019
Cc00_g26800	GSCOC_T00009925001	A0A068VKW1	Putative Disease resistance protein RPM1	GO:0043531;GO:0006952		-1.99839503281074	0.00023944741185633
Cc06_g09080	GSCOC_T00041968001	A0A068U4B6	SOUL heme-binding family protein			-1.99755815903929	9.55296399953669e-05
Cc00_g16190	GSCOC_T00013150001	A0A068VKM2	Putative uncharacterized protein			-1.99592839377881	0.0019982889051861
Cc04_g06310	GSCOC_T00022417001	A0A068TPW0	Putative uncharacterized protein	GO:0016021		-1.99515603693203	8.90300130302498e-05
Cc05_g01020	GSCOC_T00000794001	A0A068VJG3	Putative disease resistance protein RGA1	GO:0043531;GO:0006952		-1.99238564133028	0.00014979196128759
Cc00_g02660	GSCOC_T00006653001	A0A068VAB8	Tabersonine 16-hydroxylase (Fragment)	GO:0016021;GO:0020037;GO:0005506;GO:0016705		-1.99112744341215	0.00611140252260081
Cc02_g20780	GSCOC_T00014697001	A0A068TN37	Putative glutamine amidotransferase YLR126C	GO:0006541	AT2G23970	-1.98906161002912	0.000153918647542762
Cc02_g33050	GSCOC_T00016746001	A0A068V5Q6	Putative GDSL esterase/lipase 5	GO:0016788	AT1G53920	-1.98740288643125	5.02783403126685e-08
Cc02_g37820	GSCOC_T00027940001	A0A068UKK6	AT hook motif DNA-binding family protein	GO:0005634;GO:0003680	AT2G45850	-1.98590122235461	0.00150010765953854
Cc07_g06340	GSCOC_T00039935001	A0A068U2Z0	Putative Probable WRKY transcription factor 7	GO:0005634;GO:0003700;GO:0043565	AT4G24240	-1.98397804994	0.0014489232968313
Cc11_g17480	GSCOC_T00038320001	A0A068UYK7	Somatic embryogenesis receptor kinase 1		AT5G21090	-1.9836090601196	8.86292624826138e-05
Cc01_g00190	GSCOC_T00012415001	A0A068VDD8	protein containing PDZ domain, a K-box domain, and a TPR region		AT1G55480	-1.98299309185621	0.00160015215796699
Cc11_g16600	GSCOC_T00038200001	A0A068UYJ2	Putative unknown protein; FUNCTIONS IN	GO:0055028;GO:0005886;GO:0051211		-1.98151985914499	0.00012660375458177
Cc00_g33900	GSCOC_T00010189001	A0A068VN58	Putative FUNCTIONS IN	GO:0007623;GO:0006355	AT3G54500	-1.97674354774191	1.66985578124094e-05
Cc06_g04440	GSCOC_T00042953001	A0A068V3Z7	Major facilitator superfamily protein	GO:0016021		-1.97553002668565	0.00627468491036642
Cc02_g28560	GSCOC_T00009442001	A0A068VDQ5	Protein of unknown function (DUF3411)		AT5G12470	-1.97002739778148	0.000296072875078739
Cc00_g28930	GSCOC_T00008415001	A0A068VL94	Putative Protein of unknown function DUF247, plant			-1.96871069912227	0.000518024813582454
Cc06_g09850	GSCOC_T00041859001	A0A068U6S5	Putative uncharacterized protein			-1.9671938815854	0.00957487891347804
Cc04_g02820	GSCOC_T00021963001	A0A068TP20	Hypothetical protein		AT3G16250	-1.96520488713317	0.000657431843555515
Cc03_g07590	GSCOC_T00026614001	A0A068TT13	Putative unknown protein; FUNCTIONS IN	GO:0009536		-1.96425704885881	0.00809780095542421
Cc11_g03500	GSCOC_T00040795001	A0A068V0T8	Putative UDP-glycosyltransferase 85A2	GO:0008194	AT1G22380	-1.96329782762489	1.16375085618515e-05
Cc01_g19410	GSCOC_T00016061001	A0A068U4Z7	Chalcone-flavanone isomerase family protein	GO:0009941;GO:0009570;GO:0005739;GO:0005504;GO:0016872;GO:0006631	AT3G63170	-1.96057726477217	0.000408204721362169
Cc02_g19420	GSCOC_T00014508001	A0A068TPG4	Putative uncharacterized protein		AT1G24625	-1.96043183668195	0.00409934934668325
Cc06_g17810	GSCOC_T00040372001	A0A068V0G1	Zeatin O-glucosyltransferase	GO:0008194	AT3G11340	-1.95781900235274	0.000160963619431189
Cc10_g06080	GSCOC_T00034712001	A0A068U0N9	ATP synthase delta chain, chloroplastic	GO:0009941;GO:0009535;GO:0010287;GO:0010319;GO:0046933;GO:0015986;GO:0042742;GO:0009773;GO:0009772;GO:0009409	AT4G09650	-1.9559603522276	0.000198808256026672
Cc07_g04160	GSCOC_T00039668001	A0A068U1D1	Alpha-amylase isozyme 2A	GO:0004556;GO:0005509;GO:0005975	AT1G69830	-1.95535046417194	0.0008021670911496
Cc07_g14870	GSCOC_T00036559001	A0A068TZI7	Putative Protein CbbY	GO:0016787	AT4G39970	-1.95454154221347	0.000511531509891028
Cc03_g09080	GSCOC_T00042716001	A0A068V3Q6	Peptidyl-prolyl cis-trans isomerase FKBP65	GO:0003755	AT5G48570	-1.95271275573827	0.000486115354383709
Cc02_g03300	GSCOC_T00020209001	A0A068U9U5	Putative IQ-domain 22		AT1G74690	-1.94882527365719	1.27133370585253e-05
Cc01_g17350	GSCOC_T00016335001	A0A068U5S8	unknown protein; FUNCTIONS IN			-1.94846793581605	0.000305879884901633
Cc03_g02730	GSCOC_T00025940001	A0A068TSJ9	Pyruvate, phosphate dikinase, chloroplastic	GO:0005524;GO:0016301;GO:0046872;GO:0050242;GO:0006090	AT4G15530	-1.94798473740923	6.90823499869878e-06
Cc02_g00690	GSCOC_T00019859001	A0A068U8U0	Uncharacterized calcium-binding protein At1g02270		AT1G02270	-1.94516558845116	0.000114057713162627
Cc10_g13030	GSCOC_T00035352001	A0A068UWJ3	Putative Cyanidin-3-O-glucoside 2-O-glucuronosyltransferase	GO:0008194	AT2G29750	-1.94377053138581	0.00013244696137069
Cc00_g04380	GSCOC_T00010849001	A0A068VF68	UDP-glycosyltransferase 86A1	GO:0008194	AT2G36970	-1.94366042274366	0.00111212168008567
Cc04_g02740	GSCOC_T00021952001	A0A068TRK1	Putative Uncharacterized isomerase BH0283	GO:0003824;GO:0009058		-1.94338425463317	0.00122465733152352
Cc01_g17770	GSCOC_T00016283001	A0A068U6J7	Photosystem II reaction center PSB28 protein, chloroplastic	GO:0009654;GO:0015979		-1.94263717887732	0.00215329551520175
Cc04_g14560	GSCOC_T00040705001	A0A068V1H4	L-type lectin-domain containing receptor kinase IV.2	GO:0016021;GO:0005524;GO:0030246;GO:0004672	AT2G37710	-1.94141585168817	0.00494513900429215
Cc06_g00400	GSCOC_T00023216001	A0A068UDV6	Elongation factor P	GO:0009570;GO:0003746		-1.94035080599596	0.000857684484244957
Cc03_g01320	GSCOC_T00025741001	A0A068TTZ0	Putative uncharacterized protein	GO:0046872;GO:0030001	AT4G39700	-1.93809637161026	0.00494433577225666
Cc02_g18920	GSCOC_T00014452001	A0A068TPD3	PI-PLC X domain-containing protein At5g67130	GO:0008081;GO:0006629	AT5G67130	-1.93575480306579	4.46267282958291e-06
Cc00_g16610	GSCOC_T00013784001	A0A068VI58	Arabinanase/levansucrase/invertase			-1.93440907312822	0.000245126970520166
Cc02_g15560	GSCOC_T00014010001	A0A068TLJ7	Ras-related protein RABA1c	GO:0005525;GO:0003924	AT5G45750	-1.93383350568176	0.000319880810916928
Cc05_g09690	GSCOC_T00021550001	A0A068UC75	Putative GDSL esterase/lipase At4g10955	GO:0006629		-1.93215718087307	0.00201320397771446
Cc08_g09070	GSCOC_T00017247001	A0A068V6L0	Putative Alcohol dehydrogenase class-3	GO:0016491;GO:0008270	AT1G32780	-1.9299805499504	0.00012209384941544
Cc02_g23910	GSCOC_T00015096001	A0A068TNY0	Putative Dihydroflavonol-4-reductase	GO:0003824	AT2G45400	-1.92831980045455	2.53707670287457e-05
Cc05_g07540	GSCOC_T00042286001	A0A068V2N8	Probable protein phosphatase 2C 58	GO:0004722	AT4G28400	-1.92715603424449	0.00025102883316143
Cc09_g01700	GSCOC_T00017774001	A0A068U9W0	Peroxidase 42	GO:0005576;GO:0020037;GO:0046872;GO:0004601;GO:0042744;GO:0006979	AT4G21960	-1.92267871405303	0.00214767240942611
Cc07_g14820	GSCOC_T00036564001	A0A068TZJ1	Phospho-2-dehydro-3-deoxyheptonate aldolase 1, chloroplastic	GO:0009507;GO:0003849;GO:0009073;GO:0009423	AT4G39980	-1.92253075156116	1.74346396658645e-07
Cc04_g02830	GSCOC_T00021964001	A0A068TPN3	NDH-dependent cyclic electron flow 1	GO:0009055;GO:0051536	AT3G16250	-1.92174896567914	0.00101516884358568
Cc02_g04050	GSCOC_T00020308001	A0A068UA11	DNA photolyases;DNA photolyases			-1.92088219755179	9.50153674235352e-07
Cc02_g32200	GSCOC_T00012954001	A0A068VCU6	Hypothetical protein	GO:0016021		-1.91909048580479	0.00778229814673433
Cc02_g11580	GSCOC_T00029393001	A0A068TUV1	Uncharacterized protein		AT4G04900	-1.9178031937941	0.00303785342309524
Cc08_g12710	GSCOC_T00030441001	A0A068UQP5	L-lactate dehydrogenase A	GO:0005737;GO:0004459;GO:0005975;GO:0019752		-1.9151509581855	0.000353544158328283
Cc02_g35140	GSCOC_T00012344001	A0A068VK15	Chloroplast stem-loop binding protein of 41 kDa b, chloroplastic	GO:0003824	AT1G09340	-1.91386507741539	0.0012533902361901
Cc02_g18100	GSCOC_T00014345001	A0A068TLK0	Long chain acyl-CoA synthetase 2	GO:0003824	AT1G49430	-1.91252779085643	0.000141052635023339
Cc07_g00870	GSCOC_T00019168001	A0A068V8A7	50S ribosomal protein L27, chloroplastic	GO:0005840;GO:0003735;GO:0006412	AT5G40950	-1.91199172008937	0.00153983645546128
Cc00_g12870	GSCOC_T00002614001	A0A068VGZ1	Double-stranded RNA-binding protein 2	GO:0003723	AT2G28380	-1.91129979909774	0.00659698835725349
Cc00_g13990	GSCOC_T00010020001	A0A068VGW1	exocyst subunit exo70 family protein H2	GO:0000145;GO:0006887;GO:0015031		-1.91120340352357	0.00971925241766073
Cc11_g15400	GSCOC_T00038050001	A0A068UY97	Protein NSP-INTERACTING KINASE 3	GO:0016021;GO:0005524;GO:0004674	AT1G60800	-1.91008968219847	0.00369701476112572
Cc07_g01950	GSCOC_T00039374001	A0A068U0M2	Putative Anthranilate phosphoribosyltransferase	GO:0004048;GO:0000162	AT5G17990	-1.90900671428983	0.000608983309977729
Cc09_g08040	GSCOC_T00003802001	A0A068V9X7	Homeobox-leucine zipper protein HOX32	GO:0005634;GO:0003677;GO:0008289	AT2G34710	-1.90748026624253	0.00632535400258628
Cc08_g00530	GSCOC_T00038504001	A0A068UYA3	ATP synthase subunit b', chloroplastic	GO:0016021;GO:0045263;GO:0015078;GO:0015986		-1.90460842846208	0.000343986314559634
Cc01_g13710	GSCOC_T00028348001	A0A068ULN1	Putative Mitochondrial uncoupling protein 3	GO:0005794;GO:0016021;GO:0031966;GO:0005886;GO:0015171;GO:0006839	AT5G58970	-1.90454708326894	0.00169632837506799
Cc08_g08150	GSCOC_T00007257001	A0A068VD00	Potassium channel KAT3	GO:0005783;GO:0016021;GO:0005886;GO:0005249	AT4G32650	-1.90347483088971	0.00208270698880258
Cc00_g06650	GSCOC_T00007489001	A0A068VDH1	Putative Bifunctional dihydroflavonol 4-reductase/flavanone 4-reductase	GO:0003824	AT4G35420	-1.90318359683247	0.0047707624431497
Cc03_g01090	GSCOC_T00025712001	A0A068TR59	cAMP-regulated phosphoprotein 19-related protein			-1.90316564333658	0.00893282211295385
Cc06_g22760	GSCOC_T00040673001	A0A068V103	Probable S-acyltransferase At5g05070	GO:0016021;GO:0019706	AT5G05070	-1.90309094448151	0.00445203295336256
Cc11_g06560	GSCOC_T00020675001	A0A068UD40	Putative late blight resistance protein homolog R1B-14	GO:0043531;GO:0006952		-1.90243671762154	0.00118117565944688
Cc08_g08850	GSCOC_T00017218001	A0A068V6E5	Putative UPF0481 protein At3g47200	GO:0016021		-1.90224959246712	0.00018990354127152
Cc02_g39890	GSCOC_T00027645001	A0A068UJA7	3-ketoacyl-CoA synthase 1	GO:0016020;GO:0016747;GO:0006633	AT1G01120	-1.89991573160666	0.00137808969538351
Cc03_g02940	GSCOC_T00025967001	A0A068TRN4	Glutamine synthetase leaf isozyme, chloroplastic	GO:0048046;GO:0009941;GO:0009570;GO:0009535;GO:0022626;GO:0005739;GO:0005524;GO:0004356;GO:0006542;GO:0046686	AT5G35630	-1.89978076978119	0.00187486167275709
Cc02_g38940	GSCOC_T00027788001	A0A068UJN6	Ubiquitin-conjugating enzyme E2 28	GO:0005524;GO:0016740	AT5G41700	-1.89859562800433	0.000113066463291614
Cc02_g24310	GSCOC_T00002340001	A0A068VFY0	Putative lipid-binding protein At4g00165		AT4G00165	-1.89739875195021	0.00467143107437147
Cc02_g04950	GSCOC_T00038987001	A0A068V023	Putative Pentatricopeptide repeat-containing protein At1g02060, chloroplastic		AT1G02060	-1.89640255480152	0.00837421867185167
Cc02_g34400	GSCOC_T00000681001	A0A068V910	Putative F-box/LRR-repeat protein 3			-1.8952033048568	0.0010786085492327
Cc00_g28280	GSCOC_T00000756001	A0A068VP61	Protein SRG1	GO:0046872;GO:0016491	AT1G17020	-1.89292295712229	6.21478866928511e-06
Cc05_g11780	GSCOC_T00021271001	A0A068UBS1	Putative Ribosomal protein L11 methyltransferase	GO:0008276		-1.89181856065577	0.000208988890720782
Cc07_g07950	GSCOC_T00040157001	A0A068U2E4	Serine hydroxymethyltransferase, mitochondrial	GO:0016021;GO:0004372;GO:0030170;GO:0019264;GO:0035999	AT4G37930	-1.89124162273966	0.00302878189889042
Cc10_g02460	GSCOC_T00024749001	A0A068UG63	Putative Ocs element-binding factor 1	GO:0003700	AT1G75390	-1.89085274750917	7.49568906960266e-06
Cc09_g04450	GSCOC_T00017424001	A0A068U929	Coproporphyrinogen-III oxidase, chloroplastic	GO:0004109;GO:0006779	AT1G03475	-1.89067832512357	4.76912076855629e-06
Cc07_g05530	GSCOC_T00039829001	A0A068U4B0	Putative Zinc-finger domain of monoamine-oxidase A repressor R1	GO:0006355		-1.8892094119723	0.000222195471824365
Cc07_g10580	GSCOC_T00037097001	A0A068U076	GDP-mannose 4,6 dehydratase 2	GO:0008446;GO:0019673	AT3G51160	-1.88734525846293	8.56503112265464e-05
Cc02_g02870	GSCOC_T00020156001	A0A068UC62	Tubulin beta-1 chain	GO:0005737;GO:0005874;GO:0005525;GO:0003924;GO:0005200;GO:0007017	AT5G23860	-1.88681036633041	0.00240681959304646
Cc04_g05170	GSCOC_T00022262001	A0A068TPU2	Putative receptor-like protein kinase At1g80870	GO:0016021;GO:0005886;GO:0005524;GO:0004674	AT1G80870	-1.88541453976951	0.000680383494931239
Cc06_g02220	GSCOC_T00023470001	A0A068UDJ7	CASP-like protein At3g53850	GO:0016021;GO:0005886	AT3G53850	-1.88146892144316	0.00567277328832512
Cc08_g00130	GSCOC_T00005568001	A0A068VGI3	Probable receptor-like protein kinase At1g80640	GO:0016021;GO:0005524;GO:0004674	AT1G80640	-1.88118913725055	7.91002840640348e-05
Cc07_g07220	GSCOC_T00040061001	A0A068U2U5	Galactomannan galactosyltransferase 1	GO:0016021;GO:0016757;GO:0016021;GO:0016757	AT4G37690	-1.87915661383058	0.0010868823218865
Cc10_g11270	GSCOC_T00018481001	A0A068V7G4	Putative late blight resistance protein homolog R1A-6	GO:0043531		-1.87848951922158	0.00679591380548339
Cc06_g13300	GSCOC_T00041417001	A0A068U5T0	P-loop containing nucleoside triphosphate hydrolases superfamily protein	GO:0005524	AT5G57480	-1.8742055214419	0.00428855448265876
Cc02_g18410	GSCOC_T00014384001	A0A068TMD4	Methylthioribose kinase			-1.87364909735624	0.0084156511426847
Cc07_g02540	GSCOC_T00039452001	A0A068U1W5	Putative Heavy metal transport/detoxification superfamily protein	GO:0046872;GO:0030001		-1.87327831565833	0.0018309805242105
Cc03_g16050	GSCOC_T00001672001	A0A068VF04	Putative uncharacterized protein	GO:0007186	AT3G63420	-1.87199661001382	0.00103184946551109
Cc05_g11450	GSCOC_T00021313001	A0A068UCQ1	Putative uncharacterized protein	GO:0003700		-1.87193807100413	0.00305243820442222
Cc02_g04100	GSCOC_T00020313001	A0A068UA16	21 kDa protein	GO:0004857	AT3G47380	-1.86954620492964	0.0042194937064554
Cc02_g20290	GSCOC_T00014638001	A0A068TLX2	Pathogenesis-related protein 1B	GO:0005576	AT2G14580	-1.86938383144022	0.00018046702398227
Cc00_g03480	GSCOC_T00003113001	A0A068VBF8	Putative unknown protein; BEST Arabidopsis thaliana protein match is	GO:0051513		-1.86871962164483	0.00898331478574806
Cc07_g11600	GSCOC_T00036983001	A0A068U0X0	MATE efflux family protein 3, chloroplastic	GO:0016021;GO:0015297;GO:0042910	AT4G38380	-1.86713408131018	0.000351474467356383
Cc05_g15060	GSCOC_T00038739001	A0A068UYX4	Cellulose synthase-like protein E1	GO:0016021;GO:0016760;GO:0071555;GO:0030244	AT1G55850	-1.86563806964453	0.000832129644134845
Cc07_g14730	GSCOC_T00036574001	A0A068TZ07	Putative FAD/NAD(P)-binding oxidoreductase family protein	GO:0071949	AT5G05320	-1.86523007304381	0.000312893599542231
Cc06_g04850	GSCOC_T00043010001	A0A068V618	Peptidyl-prolyl cis-trans isomerase FKBP16-4, chloroplastic	GO:0009535;GO:0003755	AT3G10060	-1.86514052567883	3.84312118727479e-05
Cc02_g00850	GSCOC_T00019885001	A0A068U910	Polyketide cyclase/dehydrase and lipid transport superfamily protein	GO:0016021;GO:0008289		-1.86113856034457	0.000102884087626082
Cc06_g14520	GSCOC_T00041247001	A0A068U2X3	Serine carboxypeptidase-like 29	GO:0004185	AT4G30810	-1.8610578665538	2.39131161236923e-05
Cc07_g04240	GSCOC_T00039676001	A0A068U2C1	Putative chlororespiratory reduction 7	GO:0009570;GO:0016020;GO:0010275	AT5G39210	-1.85992142605076	0.00861260166178129
Cc02_g04610	GSCOC_T00020378001	A0A068UAQ5	Derlin-1.2	GO:0005789;GO:0016021	AT4G29330	-1.85940842003958	0.00168453408613374
Cc03_g02170	GSCOC_T00025854001	A0A068TU71	Putative Tip elongation aberrant protein 1			-1.85900970248118	0.00024411940588663
Cc07_g08190	GSCOC_T00040184001	A0A068U3J9	Uncharacterized protein At1g66480		AT1G66480	-1.85813751958122	0.00518907729545864
Cc11_g13630	GSCOC_T00032158001	A0A068TVK9	Thioredoxin H2	GO:0045454	AT5G39950	-1.85631909115385	0.00942821740429116
Cc07_g08720	GSCOC_T00040260001	A0A068U3A3	Chloroplastic group IIB intron splicing facilitator CRS2, chloroplastic	GO:0004045	AT5G16140	-1.85618843760315	0.00898266105910939
Cc10_g03020	GSCOC_T00024817001	A0A068UGX9	Protein of unknown function (DUF1195)	GO:0016021		-1.85193218115308	0.00811598876567166
Cc00_g12040	GSCOC_T00005331001	A0A068VGB5	Nitrate reductase [NADH]	GO:0020037;GO:0030151;GO:0043546;GO:0050464;GO:0042128;GO:0006809	AT5G17770	-1.85147251326976	0.000716534963432751
Cc03_g05210	GSCOC_T00026269001	A0A068TT73	1-aminocyclopropane-1-carboxylate oxidase homolog 3		AT1G06650	-1.85092042739499	0.000761938917410176
Cc06_g01310	GSCOC_T00023346001	A0A068UD41	Rhodanese-like domain-containing protein 10		AT3G08920	-1.84987468020959	0.00697847722162752
Cc09_g04550	GSCOC_T00017412001	A0A068U921	Leucine-rich repeat receptor-like serine/threonine-protein kinase BAM3	GO:0016021;GO:0005524;GO:0004672	AT4G20270	-1.84964058324549	0.00100936902876439
Cc02_g38860	GSCOC_T00027800001	A0A068UMB4	Uncharacterized protein At4g01150, chloroplastic	GO:0009941;GO:0009535;GO:0009515;GO:0016021;GO:0010287;GO:0090391;GO:0097753	AT4G01150	-1.84833052575402	0.000361523499641546
Cc03_g11330	GSCOC_T00000040001	A0A068VFF1	Probable methyltransferase PMT19	GO:0016021;GO:0008168;GO:0032259		-1.84648844579474	0.00992930514215041
Cc00_g15850	GSCOC_T00001708001	A0A068VH68	Calreticulin-3	GO:0005788;GO:0005509;GO:0051082;GO:0006457	AT1G08450	-1.84646136340169	0.00346097162654993
Cc08_g14140	GSCOC_T00030261001	A0A068UMN8	60S ribosomal protein L24-1		AT3G53020	-1.84118923895045	0.00144072202451898
Cc04_g10890	GSCOC_T00042664001	A0A068V365	Leucine-rich repeat receptor-like serine/threonine/tyrosine-protein kinase SOBIR1	GO:0016021;GO:0005524;GO:0004672	AT2G31880	-1.83779224078186	0.0017602637630854
Cc04_g05450	GSCOC_T00022297001	A0A068TQR2	ABC transporter I family member 17	GO:0012506;GO:0005524;GO:0016887;GO:0005315;GO:0005460;GO:0035435;GO:0010044	AT1G67940	-1.83618301969361	0.000165883937827706
Cc07_g08490	GSCOC_T00040223001	A0A068U3L9	Putative uncharacterized protein			-1.83416678022373	0.000719302707585125
Cc02_g35130	GSCOC_T00012343001	A0A068VMM3	PsbP domain-containing protein 1, chloroplastic	GO:0019898;GO:0009654;GO:0005509;GO:0015979	AT4G15510	-1.83375998998857	0.000511274410587794
Cc03_g06400	GSCOC_T00026434001	A0A068TSV6	Auxin-responsive protein IAA13	GO:0005634;GO:0009734;GO:0006355	AT2G33310	-1.83098252471961	0.000908667892780657
Cc02_g24580	GSCOC_T00028866001	A0A068ULQ5	Probable plastid-lipid-associated protein 11, chloroplastic		AT4G00030	-1.83007943538154	8.78963673699013e-05
Cc07_g15850	GSCOC_T00036418001	A0A068TZL6	Putative Gamma-glutamyltranspeptidase 1	GO:0036374;GO:0006751	AT4G39640	-1.82979095849068	0.0038648907665219
Cc02_g06450	GSCOC_T00039179001	A0A068V0H1	Putative Double Clp-N motif-containing P-loop nucleoside triphosphate hydrolases superfamily protein		AT2G40130	-1.82952761024899	0.00569652237851935
Cc11_g01580	GSCOC_T00019547001	A0A068U8L1	Putative uncharacterized protein			-1.82845414417957	0.00756962412709744
Cc08_g13580	GSCOC_T00030326001	A0A068UN24	Probable sugar phosphate/phosphate translocator At1g12500	GO:0016021	AT1G12500	-1.82838459156136	0.000952614785650751
Cc01_g08550	GSCOC_T00023883001	A0A068UE74	Serine/threonine-protein kinase Nek5	GO:0005524;GO:0004672		-1.82546057510093	0.00610787880243854
Cc05_g10170	GSCOC_T00021493001	A0A068UCW9	Peroxisomal (S)-2-hydroxy-acid oxidase	GO:0010181;GO:0016491	AT3G14420	-1.82544976069748	0.000832737354771551
Cc03_g01570	GSCOC_T00025772001	A0A068TU12	Putative Epoxide hydrolase 2	GO:0003824		-1.82410436406975	3.0388041029989e-05
Cc07_g12390	GSCOC_T00036879001	A0A068TZN8	Putative uncharacterized protein	GO:0004852;GO:0033014		-1.82293850814067	0.00085349099843585
Cc07_g04560	GSCOC_T00039712001	A0A068U1G4	O-fucosyltransferase family protein	GO:0005768;GO:0016021;GO:0005802;GO:0016757;GO:0006004	AT3G30300	-1.82264801725919	1.47032915553916e-05
Cc00_g13410	GSCOC_T00003236001	A0A068VGC2	Receptor-like protein kinase FERONIA	GO:0016021;GO:0005524;GO:0004672	AT3G51550	-1.82219470736381	0.00498443400387083
Cc11_g14720	GSCOC_T00032019001	A0A068TVW4	Carbonic anhydrase, chloroplastic	GO:0004089;GO:0008270;GO:0015976	AT5G14740	-1.82148100179937	7.10855292313397e-06
Cc06_g06030	GSCOC_T00043173001	A0A068V446	unknown protein; Has 68 Blast hits to 67 proteins in 21 species			-1.82094761924259	0.000121921357692482
Cc04_g09880	GSCOC_T00042519001	A0A068V2G3	Putative Heavy metal transport/detoxification superfamily protein	GO:0046872;GO:0030001	AT5G63530	-1.82041026220051	0.000230786940235569
Cc02_g39120	GSCOC_T00027761001	A0A068UKB5	Putative WRKY transcription factor 30	GO:0005634;GO:0003700;GO:0043565	AT4G11070	-1.82026821880321	0.000120676792248866
Cc08_g01500	GSCOC_T00038376001	A0A068V0L3	Novel plant SNARE 11	GO:0009504;GO:0016021;GO:0005886;GO:0005484;GO:0006890	AT2G35190	-1.819653026191	0.00879755414566039
Cc03_g07130	GSCOC_T00026550001	A0A068TTU2	Putative Root hair defective 3 GTP-binding			-1.8190599989675	0.000336685280462015
Cc03_g02540	GSCOC_T00025904001	A0A068TRJ4	Probable 1-deoxy-D-xylulose-5-phosphate synthase, chloroplastic	GO:0008661;GO:0016114	AT4G15560	-1.81840610457665	0.000248501106736409
Cc02_g26880	GSCOC_T00024997001	A0A068UJ75	Putative Cytokinesis negative regulator RCP1		AT2G39720	-1.81805978467057	0.000139139700466621
Cc02_g16540	GSCOC_T00014147001	A0A068TKV4	Triosephosphate isomerase, chloroplastic	GO:0004807	AT2G21170	-1.81369609983254	0.00189291633957019
Cc04_g02480	GSCOC_T00021920001	A0A068TPJ3	IQ-domain 26			-1.8136304778934	0.00467298243087382
Cc02_g13170	GSCOC_T00029191001	A0A068TTC9	Sphingolipid delta(4)-desaturase DES1	GO:0005789;GO:0016021;GO:0042284;GO:0030148	AT4G04930	-1.81286940800286	0.000296743091796124
Cc00_g17850	GSCOC_T00008901001	A0A068VHR2	Putative UDP-glycosyltransferase 91C1	GO:0008194	AT5G49690	-1.8066202587703	0.00461488420253167
Cc10_g03310	GSCOC_T00024854001	A0A068UGE7	Geranylgeranyl pyrophosphate synthase, chloroplastic	GO:0016740;GO:0008299	AT4G36810	-1.8053817304288	0.000381442604634
Cc06_g05710	GSCOC_T00043135001	A0A068V4G0	Putative uncharacterized protein	GO:0009785	AT3G52740	-1.80520474440995	0.00802074896661055
Cc06_g21650	GSCOC_T00015553001	A0A068V4P8	Protein of unknown function (DUF630 and DUF632)			-1.80034125833688	0.000868981313648126
Cc02_g01650	GSCOC_T00019993001	A0A068U989	CCT motif family protein	GO:0005634	AT5G57660	-1.79859614281498	8.98045265695194e-05
Cc11_g14190	GSCOC_T00032093001	A0A068TVC7	IAA-amino acid hydrolase ILR1-like 2	GO:0016787	AT5G56660	-1.79515609455176	0.000276247066310546
Cc07_g14260	GSCOC_T00036637001	A0A068U1R2	Putative Probable mitochondrial 2-oxoglutarate/malate carrier protein	GO:0016021;GO:0031966;GO:0006839	AT2G22500	-1.79392692170347	1.18517245843518e-05
Cc08_g01780	GSCOC_T00038336001	A0A068UXY7	Probable purine permease 9	GO:0016021;GO:0015211	AT4G18210	-1.79157377023	0.00446606382428856
Cc07_g13000	GSCOC_T00036804001	A0A068U0K3	unknown protein; CONTAINS InterPro DOMAIN/s			-1.7905253561389	0.000619037876335294
Cc09_g07230	GSCOC_T00036293001	A0A068UWD8	Bifunctional dihydrofolate reductase-thymidylate synthase 2	GO:0004799;GO:0006231	AT4G34570	-1.79023617578388	0.00738310517266018
Cc07_g08550	GSCOC_T00040232001	A0A068U2I6	Probable non-specific lipid-transfer protein AKCS9	GO:0006869		-1.78693243438424	0.000421887627758078
Cc07_g12300	GSCOC_T00036893001	A0A068U0R5	Auxin efflux carrier family protein	GO:0016021;GO:0055085	AT1G76520	-1.78671754411112	0.00347289563277034
Cc08_g15680	GSCOC_T00035508001	A0A068UWV7	Ubiquitin-conjugating enzyme E2 10	GO:0005524;GO:0016740	AT5G53300	-1.78646181503194	0.000971174829824774
Cc06_g07210	GSCOC_T00031293001	A0A068UPQ7	Putative Lysosomal beta glucosidase	GO:0004553;GO:0005975		-1.78601224754527	8.70260142095793e-05
Cc01_g02660	GSCOC_T00013192001	A0A068VAR3	Putative Taxadien-5-alpha-ol O-acetyltransferase	GO:0016747;GO:0009805		-1.78535460713539	0.000946395960814063
Cc11_g08290	GSCOC_T00032897001	A0A068TWY6	DELLA protein GAI1	GO:0005634;GO:0003712	AT1G14920	-1.78270277336299	0.00238032732544691
Cc05_g04350	GSCOC_T00031660001	A0A068URB6	Putative uncharacterized protein	GO:0009570;GO:0047769;GO:0004664;GO:0009094		-1.78032317527012	0.00320742388527206
Cc10_g01910	GSCOC_T00024684001	A0A068UG10	S-adenosyl-L-methionine-dependent methyltransferases superfamily protein	GO:0016021;GO:0008168		-1.77946562248181	0.00206179482627936
Cc00_g14310	GSCOC_T00011140001	A0A068VHC3	NADP-dependent D-sorbitol-6-phosphate dehydrogenase	GO:0016491	AT2G37770	-1.7788141683363	0.00124145071364711
Cc07_g19530	GSCOC_T00018561001	A0A068U8R8	Putative Filament-like plant protein 3	GO:0031410;GO:0030674;GO:0060178	AT3G05270	-1.77755931133214	0.00405627570885384
Cc10_g01700	GSCOC_T00024656001	A0A068UFR1	Putative uncharacterized protein			-1.77667026535591	0.00663413114920607
Cc02_g03460	GSCOC_T00020230001	A0A068UAF9	unknown protein; FUNCTIONS IN			-1.7717487841747	0.000448655781988878
Cc03_g05780	GSCOC_T00026346001	Q6P9B6	Fibrillin 4		AT3G23400	-1.7712707181407	0.00120412086108654
Cc07_g02320	GSCOC_T00039418001	A0A068U1F6	Putative Serine/threonine-protein kinase HT1	GO:0005524;GO:0004672		-1.77065914400421	1.06394679325381e-05
Cc08_g12470	GSCOC_T00030476001	A0A068UNR8	Putative Predicted protein			-1.76841140939004	0.00153665235279195
Cc10_g15550	GSCOC_T00033741001	A0A068USR0	Putative Predicted protein			-1.76721794311525	0.00175789226118712
Cc11_g15820	GSCOC_T00038104001	A0A068UXW5	Hypothetical protein			-1.76652123555517	1.61029827835028e-05
Cc08_g01660	GSCOC_T00038350001	A0A068UYM7	Putative Disease resistance protein RPM1	GO:0043531;GO:0006952	AT4G12020	-1.76613900915437	0.00263586312683104
Cc03_g08400	GSCOC_T00033256001	A0A068USH9	DNAJ-like 20		AT4G13830	-1.76485295197229	0.00189923113450078
Cc09_g10620	GSCOC_T00041022001	A0A068V1H5	Putative LysM domain-containing GPI-anchored protein 2		AT2G17120	-1.76330753377526	0.000448139839710297
Cc02_g39110	GSCOC_T00027762001	A0A068UM96	Putative Dihydroflavonol-4-reductase	GO:0003824		-1.76301991992573	4.6595862895896e-06
Cc01_g06530	GSCOC_T00030041001	A0A068UMY0	Early nodulin-like protein	GO:0016021;GO:0009055	AT5G15350	-1.76278911803598	0.000418759115315749
Cc06_g06280	GSCOC_T00031402001	A0A068USN0	unknown protein; LOCATED IN	GO:0005886		-1.76161641377098	0.00108699799571003
Cc09_g10260	GSCOC_T00041066001	A0A068V1V4	Protein of unknown function (DUF3353)	GO:0016021		-1.75992100864518	0.00139304448746477
Cc04_g03790	GSCOC_T00022085001	A0A068TRW7	Putative Root phototropism protein 3		AT1G03010	-1.75840339729142	0.00306727152680574
Cc02_g20520	GSCOC_T00014666001	A0A068TPQ1	Putative Predicted protein			-1.75801710236739	0.00352736591288652
Cc02_g22300	GSCOC_T00014899001	A0A068TMP1	Lung seven transmembrane receptor family protein	GO:0016021		-1.7572796728694	0.00176158324458078
Cc01_g14360	GSCOC_T00028434001	A0A068ULX1	Putative Probable NADH dehydrogenase	GO:0016491	AT1G07180	-1.75714937722507	6.71899369803996e-07
Cc04_g05520	GSCOC_T00022311001	A0A068TPW7	Unknown protein DS12 from 2D-PAGE of leaf, chloroplastic	GO:0009941;GO:0009570;GO:0009535;GO:0010319;GO:0009409;GO:0009416;GO:0009744	AT1G16880	-1.75581797293754	0.00581127745392198
Cc11_g11280	GSCOC_T00032466001	A0A068TW61	Chaperonin 60 subunit beta 4, chloroplastic	GO:0009941;GO:0009570;GO:0005524;GO:0042026	AT1G26230	-1.75397374791937	0.00310319603192089
Cc10_g01220	GSCOC_T00024591001	A0A068UGE1	Thioredoxin superfamily protein			-1.75290494637072	0.00143458396439611
Cc02_g16950	GSCOC_T00014197001	A0A068TL79	Probable fructose-bisphosphate aldolase 2, chloroplastic	GO:0004332;GO:0006096	AT4G38970	-1.75261045595632	0.000912230029948864
Cc02_g21400	GSCOC_T00014781001	A0A068TMG8	Metacaspase-1		AT1G02170	-1.75251577653769	0.0044644499402712
Cc02_g05980	GSCOC_T00039120001	A0A068V079	Putative uncharacterized protein	GO:0005524	AT3G42670	-1.7523075557412	0.0027743167014932
Cc07_g02370	GSCOC_T00039425001	A0A068U1G1	UDP-glycosyltransferase 90A1	GO:0008194	AT2G16890	-1.75204765192331	0.00643708513649136
Cc08_g09250	GSCOC_T00017270001	A0A068V6Q4	Phosphorylase superfamily protein	GO:0003824;GO:0009116		-1.75188020351278	0.00301327341133507
Cc01_g20400	GSCOC_T00015938001	A0A068U4U7	Chaperone DnaJ-domain superfamily protein	GO:0016021	AT4G09350	-1.74789560642397	0.00171268857031815
Cc07_g09730	GSCOC_T00037204001	A0A068U0G1	alpha/beta-Hydrolases superfamily protein			-1.74665702529708	0.0043323173423469
Cc06_g13370	GSCOC_T00041408001	A0A068U379	4-coumarate--CoA ligase 1	GO:0003824	AT1G51680	-1.74581687047716	0.00049664817514968
Cc06_g06710	GSCOC_T00031349001	A0A068UPW6	Putative Nuclear transcription factor Y subunit A-2	GO:0003700	AT3G05690	-1.74469363808176	0.000102884087626082
Cc01_g15420	GSCOC_T00016562001	A0A068U775	Probable LRR receptor-like serine/threonine-protein kinase At1g06840	GO:0016021;GO:0005524;GO:0004674	AT1G06840	-1.74323384081176	0.00199495837309246
Cc02_g16100	GSCOC_T00014085001	A0A068TL13	Integrin-linked protein kinase family	GO:0005524;GO:0004672	AT2G43850	-1.74241032336078	5.5293020361566e-06
Cc02_g33750	GSCOC_T00015424001	A0A3P8MYS4	Putative E3 ubiquitin-protein ligase ATL6	GO:0016021	AT3G05200	-1.73913175190128	0.000945846973665358
Cc07_g03170	GSCOC_T00039535001	A0A068U1R0	Putative Aldose 1-epimerase	GO:0004034;GO:0030246;GO:0019318		-1.73881474661389	0.000421887627758078
Cc04_g15820	GSCOC_T00042368001	A0A068V263	ABC transporter C family member 3	GO:0016021;GO:0005524;GO:0016887;GO:0042626	AT3G13080	-1.73793344273216	0.00988247288927958
Cc11_g17290	GSCOC_T00038291001	A0A068V0G9	Peptidyl-prolyl cis-trans isomerase CYP20-2, chloroplastic	GO:0009533;GO:0009535;GO:0031977;GO:0003755;GO:0043424;GO:0010275;GO:0006457	AT5G13120	-1.73747283579977	0.000406485309165785
Cc04_g10850	GSCOC_T00042658001	A0A068V3F4	Abhydrolase domain-containing protein FAM108C1			-1.73421329379553	0.00383003205282734
Cc07_g00640	GSCOC_T00019142001	A0A068V7U0	FUNCTIONS IN	GO:0005886		-1.73262311693134	0.000795485715552983
Cc05_g13160	GSCOC_T00021099001	A0A068UDV2	Kinesin-3	GO:0005874;GO:0005524;GO:0008017;GO:0003777;GO:0007018	AT5G54670	-1.73222573939938	0.000951821138972228
Cc00_g03200	GSCOC_T00011582001	A0A068VE14	Protein SRG1		AT1G17020	-1.73125312889694	0.00513848944667161
Cc02_g02820	GSCOC_T00020150001	A0A068UC58	Pectinacetylesterase family protein	GO:0005618;GO:0005576;GO:0016787;GO:0071555	AT5G23870	-1.73074611366848	0.000239988696516715
Cc04_g05480	GSCOC_T00022302001	A0A068TQI1	Predicted protein			-1.72860388773116	0.000443971014714226
Cc08_g05140	GSCOC_T00042443001	A0A068V2Q5	Plant protein of unknown function (DUF946)			-1.72671536702446	0.00232396589693051
Cc06_g03980	GSCOC_T00023699001	A0A068UER7	Phenylalanine ammonia-lyase	GO:0005737;GO:0045548;GO:0009800;GO:0006559	AT2G37040	-1.72663867238452	0.00408543722583184
Cc06_g18090	GSCOC_T00040413001	A0A068V0Z1	6-phosphogluconate dehydrogenase family protein	GO:0009331;GO:0004367;GO:0051287;GO:0005975;GO:0046168		-1.72636165566197	0.00625139294971956
Cc00_g23200	GSCOC_T00012798001	A0A068VJS6	Putative Root hair defective 3 GTP-binding	GO:0016021		-1.72606582350184	8.20276458487568e-06
Cc05_g09700	GSCOC_T00021549001	A0A068UD93	Uncharacterized protein	GO:0016021		-1.72519892785973	0.00508146447328014
Cc05_g12090	GSCOC_T00021233001	A0A068UBH7	Putative Protein of unknown function (DUF2921)	GO:0016021		-1.72499652097641	0.00236461227235103
Cc00_g20670	GSCOC_T00001284001	A0A068VIU1	NAD(P)H dehydrogenase 18	GO:0009535;GO:0006979	AT5G43750	-1.72350322652982	0.00539935310415443
Cc07_g12340	GSCOC_T00036887001	A0A068TZP3	Putative Cucumisin	GO:0004252	AT4G10520	-1.72230723525072	0.0094014011392704
Cc03_g07240	GSCOC_T00026568001	A0A068TSY0	Purple acid phosphatase 23	GO:0003993;GO:0046872	AT3G07130	-1.72175465021655	0.000104033287080607
Cc02_g11230	GSCOC_T00029438001	A0A068TUX7	Phenylalanine ammonia-lyase	GO:0016841	AT3G53260	-1.72148379515569	0.000296743091796124
Cc04_g14650	GSCOC_T00040725001	A0A068V3B0	L-type lectin-domain containing receptor kinase IV.1	GO:0016021;GO:0005524;GO:0030246;GO:0004672	AT2G37710	-1.71826465808185	0.000876961629603915
Cc05_g06060	GSCOC_T00035212001	A0A068UWA4	diacylglycerol kinase 5	GO:0005524;GO:0004143;GO:0003951;GO:0006952;GO:0007205	AT2G20900	-1.71782160940116	0.00248802825407063
Cc08_g00210	GSCOC_T00005577001	A0A068VDJ3	Homeobox protein knotted-1-like 3	GO:0005634;GO:0003677;GO:0006355	AT5G25220	-1.71757843789307	7.15290854580719e-06
Cc03_g09790	GSCOC_T00030969001	A0A068UPX3	Probable aldo-keto reductase 2		AT1G60710	-1.71623320535964	0.00251643464957409
Cc05_g03650	GSCOC_T00017360001	A0A068V6Z9	Putative Allene oxide synthase, chloroplastic	GO:0020037;GO:0005506;GO:0004497;GO:0016705	AT4G15440	-1.71516495633735	0.00010098723248433
Cc10_g04440	GSCOC_T00034934001	A0A068TZ51	Putative Patatin group A-3	GO:0016787;GO:0016042	AT2G26560	-1.71418765087076	0.00142915907304082
Cc01_g12450	GSCOC_T00028181001	A0A068UN14	Actin-depolymerizing factor 1	GO:0015629;GO:0003779;GO:0030042	AT5G59890	-1.70964043335464	0.000275189514224718
Cc02_g22410	GSCOC_T00014912001	A0A068TNE1	Putative Elongation of fatty acids protein 1	GO:0016021		-1.70941530355879	0.0024316247920941
Cc02_g17840	GSCOC_T00014312001	A0A068TL71	PPPDE putative thiol peptidase family protein		AT4G17486	-1.70840911457258	0.00117124377239307
Cc07_g15660	GSCOC_T00036449001	A0A068U1C2	C2 domain-containing protein	GO:0010330;GO:0055028;GO:0009898;GO:0005794;GO:0036449;GO:0009506;GO:0008017;GO:0051211;GO:0009901;GO:0030244;GO:0010215;GO:0043622;GO:0048467;GO:0009833;GO:0048868;GO:0010208;GO:0072699;GO:0070507;GO:2000067;GO:0051592;GO:0009414	AT2G22125	-1.70753480810516	0.00024244569886155
Cc02_g15390	GSCOC_T00013985001	A0A068TKL5	Shaggy-related protein kinase eta	GO:0005938;GO:0005634;GO:0005886;GO:0005524;GO:0042802;GO:0004674;GO:0009742;GO:0009729;GO:0009965;GO:0009825;GO:1900458;GO:0046827;GO:0046777;GO:0009733;GO:0048765	AT4G18710	-1.70658217029477	3.49480759227037e-05
Cc05_g06480	GSCOC_T00042138001	A0A068V275	Putative transferases;folic acid binding	GO:0005542;GO:0016740		-1.70642893053249	0.00443540288851524
Cc06_g16450	GSCOC_T00030691001	A0A068UP49	nucleolar protein gar2-related			-1.70511312737296	0.000283007127949861
Cc01_g21140	GSCOC_T00005018001	A0A068V9B2	Putative Probable polygalacturonase	GO:0005576;GO:0004650;GO:0005975;GO:0071555		-1.70352891035791	0.000360988399594696
Cc01_g15720	GSCOC_T00016529001	A0A068U743	Putative uncharacterized protein			-1.70233384266464	0.00179683970274605
Cc01_g11560	GSCOC_T00028058001	A0A068UKZ9	alpha/beta-Hydrolases superfamily protein			-1.69929674302814	0.000188831129517338
Cc08_g03490	GSCOC_T00034129001	A0A068UTT5	Glycerol-3-phosphate acyltransferase, chloroplastic	GO:0009570;GO:0004366;GO:0102420;GO:0016024;GO:0006655	AT1G32200	-1.69870581555622	8.33583761717446e-05
Cc05_g05260	GSCOC_T00035089001	A0A068UW35	Putative pterin-4-alpha-carbinolamine dehydratase	GO:0008124;GO:0006729	AT5G51110	-1.69693107440595	0.00524527498722886
Cc01_g20190	GSCOC_T00015962001	A0A068U5H2	Putative Xanthoxin dehydrogenase	GO:0016491	AT3G51680	-1.69612542533708	0.00400511117085516
Cc08_g16830	GSCOC_T00035658001	A0A068UXA2	unknown protein; BEST Arabidopsis thaliana protein match is		AT1G03055	-1.69495081427211	0.000465433930861259
Cc02_g06610	GSCOC_T00039203001	A0A068UZQ4	Alpha/beta hydrolase related protein	GO:0016021		-1.69400099796416	0.00151533039387424
Cc02_g27980	GSCOC_T00025156001	A0A068UJJ0	NADPH	GO:0016491	AT3G27890	-1.69185518460574	0.00142823647107722
Cc08_g02620	GSCOC_T00037740001	A0A068UX54	unknown protein; FUNCTIONS IN	GO:0016021;GO:0004197;GO:0071586		-1.69184191933628	4.77378965898243e-06
Cc01_g09010	GSCOC_T00023942001	A0A068UEJ2	Rho GTPase activating protein with PAK-box/P21-Rho-binding domain	GO:0007165	AT5G22400	-1.68999627887831	0.00115086926972933
Cc00_g00600	GSCOC_T00036154001	A0A068UW60	Putative uncharacterized protein	GO:0016021;GO:0005524;GO:0004674	AT5G38280	-1.68968329185253	0.000364329028741254
Cc05_g14450	GSCOC_T00038818001	A0A068UZE0	Putative Acyl-CoA--sterol O-acyltransferase 1	GO:0016021;GO:0008374		-1.68631757522405	0.00199642629963632
[truncated: 260 more rows]

## Sheet: Up-regulated
Gene ID	ORF Name	Uniprot acession	Protein Name	GO Terms	TAIR	Log2FC	FDR
Cc06_g05620	GSCOC_T00043121001	A0A068V3M6	Probable purple acid phosphatase 20	GO:0003993;GO:0046872	AT3G52780	13.0313616833168	9.59155598636788e-21
Cc09_g07380	GSCOC_T00036269001	A0A068UWC1	Putative Reticuline oxidase-like protein	GO:0050660;GO:0016491	AT1G30760	12.4356483260986	2.02811471044552e-19
Cc09_g07390	GSCOC_T00036268001	A0A068UVZ9	Putative Reticuline oxidase-like protein	GO:0071949;GO:0016491	AT4G20820	11.5259235483915	1.2874084546365e-16
Cc04_g10590	GSCOC_T00042615001	A0A068V334	Putative Cytochrome P450 82A1 (Fragment)	GO:0020037;GO:0005506;GO:0016705	AT4G31970	10.9484010567599	4.93385379512498e-15
Cc10_g00760	GSCOC_T00024535001	A0A068UFR8	Putative Arabidopsis protein of unknown function (DUF241)			10.9238931794059	7.47845806195611e-15
Cc08_g11420	GSCOC_T00027143001	A0A068UIP3	Expansin-like B1	GO:0005576;GO:0019953	AT4G17030	10.9197809034645	6.70508893233957e-08
Cc00_g15520	GSCOC_T00000738001	A0A068VKB1	Beta-fructofuranosidase, insoluble isoenzyme 1	GO:0004553;GO:0005975	AT3G52600	10.5394010836312	3.52628778642396e-14
Cc07_g04930	GSCOC_T00039754001	A0A068U446	Putative TRICHOME BIREFRINGENCE-LIKE 19	GO:0016021	AT5G15900	10.2021971475979	3.684335061425e-13
Cc02_g24750	GSCOC_T00028846001	A0A068UPB0	Carotenoid cleavage dioxygenase 7, chloroplastic	GO:0046872;GO:0016702;GO:0016121;GO:0009733;GO:0010223;GO:1901601		9.81838453818349	2.44911599241227e-16
Cc03_g15270	GSCOC_T00026800001	A0A068UHQ0	Putative Reticuline oxidase-like protein	GO:0071949;GO:0016491	AT4G20820	9.78385348409562	1.23117641501399e-10
Cc02_g03420	GSCOC_T00020226001	A0A068UCA4	Putative Ethylene-responsive transcription factor ERF027	GO:0005634;GO:0003677;GO:0003700	AT5G52020	9.72012451476015	2.66456471292526e-12
Cc11_g06140	GSCOC_T00020608001	A0A068UAJ3	Putative Flavanone 7-O-glucoside 2''-O-beta-L-rhamnosyltransferase	GO:0008194	AT1G05680	9.68241115599888	1.13945162029726e-10
Cc11_g10180	GSCOC_T00032611001	A0A068TWI6	3-ketoacyl-CoA synthase 6	GO:0016021;GO:0016747;GO:0006633	AT1G68530	9.64569426809402	4.60525165996426e-12
Cc08_g00160	GSCOC_T00005571001	A0A068VDI9	Putative Transmembrane 9 superfamily member 4	GO:0016021	AT5G35160	9.417506276288	3.44872307485333e-10
Cc04_g10600	GSCOC_T00042618001	A0A068V3C4	Putative Cytochrome P450 82A3	GO:0020037;GO:0005506;GO:0004497;GO:0016705	AT4G31940	9.34614825495959	1.82516465220417e-11
Cc02_g03430	GSCOC_T00020227001	Q6REU5	Dehydration-responsive element-binding protein 1D	GO:0005634;GO:0003677;GO:0003700	AT4G25490	9.25746965004076	5.00355534674681e-10
Cc06_g15980	GSCOC_T00030750001	A0A068UPG4	18 kDa seed maturation protein	GO:0005829;GO:0009793;GO:0009409;GO:0006970;GO:0009414	AT5G06760	9.18876012967948	1.88784578300394e-09
Cc01_g19640	GSCOC_T00016033001	A0A068U5P1	Putative Basic 7S globulin	GO:0004190		9.11679211104737	4.14896590003123e-26
Cc00_g03750	GSCOC_T00013262001	A0A068VC22	Putative ABC transporter B family member 9	GO:0016021;GO:0005524;GO:0016887;GO:0042626	AT4G18050	9.10249512787417	8.85953818925113e-11
Cc10_g08590	GSCOC_T00034368001	A0A068TXW7	Putative Probable protein phosphatase 2C 74	GO:0004722	AT1G07160	9.05944449252636	4.20078104249501e-10
Cc04_g11660	GSCOC_T00037368001	A0A068UYQ0	Aldehyde dehydrogenase family 2 member C4	GO:0016620	AT3G24503	8.72766787396655	1.43287017607942e-07
Cc01_g18390	GSCOC_T00016211001	A0A068U635	Ethylene-responsive transcription factor 1B	GO:0005634;GO:0003677;GO:0003700	AT3G23240	8.68309785742	7.63930832970432e-08
Cc02_g19460	GSCOC_T00014514001	A0A068TMN1	Probable indole-3-acetic acid-amido synthetase GH3.1		AT2G14960	8.65034478480503	3.80587049156297e-07
Cc08_g11410	GSCOC_T00027142001	A0A068UIH5	Expansin-like B1	GO:0005576;GO:0019953	AT4G17030	8.6186974060645	5.0497069506806e-06
Cc11_g17390	GSCOC_T00038305001	A0A068V0H7	Putative Bidirectional sugar transporter SWEET15	GO:0000139;GO:0005887;GO:0008515;GO:0071215;GO:0071470;GO:0071446;GO:0009793;GO:0010150;GO:0010431	AT5G13170	8.49428305030424	7.13172963778172e-09
Cc05_g04940	GSCOC_T00035039001	A0A068UTQ7	Isocitrate lyase	GO:0004451;GO:0046872;GO:0019752	AT3G21720	8.48849231050721	4.08920765788199e-09
Cc07_g13640	GSCOC_T00036712001	A0A068TZ83	Putative Rhamnogalacturonate lyase	GO:0030246;GO:0003824;GO:0005975		8.42579586712528	6.51699115740575e-07
Cc10_g08940	GSCOC_T00034320001	A0A068TXT8	alpha/beta-Hydrolases superfamily protein	GO:0006629	AT3G14360	8.38103651209752	1.70685453310358e-07
Cc02_g34740	GSCOC_T00011780001	A0A068VCD7	Protein of unknown function (DUF679)	GO:0016021	AT5G46090	8.35908983996661	1.79743929523541e-09
Cc07_g03560	GSCOC_T00039595001	A0A068U183	Casparian strip membrane protein POPTRDRAFT_569472	GO:0016021;GO:0005886	AT1G14160	8.35536958192668	1.05290372082348e-06
Cc06_g09490	GSCOC_T00041906001	A0A068U599	Probable sulfate transporter 3.5	GO:0016021;GO:0008271	AT5G19600	8.35176039223376	1.68722954638897e-08
Cc06_g00670	GSCOC_T00023255001	A0A068UD52	Sex determination protein tasselseed-2		AT3G51680	8.33265063522921	5.82415026928804e-07
Cc05_g00080	GSCOC_T00017025001	A0A068V633	Late embryogenesis abundant protein EMB564		AT2G40170	8.31008378196309	4.68024576119132e-07
Cc09_g03110	GSCOC_T00017588001	A0A068U7L5	GDSL esterase/lipase At5g33370	GO:0016788	AT5G33370	8.26725631252331	3.75074769915538e-07
Cc01_g19530	GSCOC_T00016046001	A0A068U7N4	Hypothetical protein			8.20223465522124	1.83673035967848e-10
Cc01_g19650	GSCOC_T00016031001	A0A068U526	Eukaryotic aspartyl protease family protein	GO:0004190		8.18889466355707	1.34064245833383e-17
Cc08_g13570	GSCOC_T00030328001	A0A068UNH2	Putative Mavicyanin	GO:0009055		8.09765546587559	1.70173411927201e-10
Cc11_g07770	GSCOC_T00018007001	A0A068V677	Pathogenesis-related protein R major form		AT4G11650	7.9854986512051	0.000115499613375683
Cc01_g07390	GSCOC_T00030175001	A0A068UQ72	Alcohol dehydrogenase-like 7	GO:0016491;GO:0008270	AT5G42250	7.9575956420672	1.04685383747624e-06
Cc07_g13930	GSCOC_T00036676001	A0A068TZ92	Putative UDP-rhamnose	GO:0008194	AT5G49690	7.89085184724981	3.20753839689346e-19
Cc04_g11860	GSCOC_T00037396001	A0A068UYR4	Putative Oleosin 5	GO:0016021;GO:0012511		7.8840563782536	9.19368050378742e-05
Cc07_g16730	GSCOC_T00037525001	A0A068UX31	DNA binding protein, putative	GO:0005634;GO:0003677;GO:0003700	AT5G64750	7.86919133202842	1.61904074080222e-05
Cc03_g12250	GSCOC_T00015253001	A0A068U576	Desiccation-related protein PCC13-62			7.86243184240054	7.21468130576254e-05
Cc06_g19120	GSCOC_T00028963001	A0A068UM56	Hypothetical protein	GO:0016021		7.85613422876061	2.66788053385171e-05
Cc07_g18370	GSCOC_T00018761001	A0A068U858	Predicted protein			7.81342006001327	2.09458143481163e-38
Cc02_g15140	GSCOC_T00013950001	A0A068TKK0	transcription factor-related	GO:0043565;GO:0006351	AT4G18650	7.74239719663126	3.16795745801317e-05
Cc09_g03320	GSCOC_T00017564001	A0A068U6Y1	Putative uncharacterized protein			7.72979203949744	9.425319940052e-07
Cc00_g21210	GSCOC_T00009603001	A0A068VJL2	myb domain protein 108	GO:0003677	AT5G49620	7.71964405088014	2.96654094120156e-12
Cc11_g08110	GSCOC_T00032920001	A0A068TZM9	Protein PLANT CADMIUM RESISTANCE 2	GO:0016021	AT1G14870	7.67444753123188	1.38503478799656e-08
Cc08_g13960	GSCOC_T00030281001	A0A068UQD5	Putative Dehydration-responsive element-binding protein 1D	GO:0005634;GO:0003677;GO:0003700	AT4G25480	7.64933435503286	1.11276006126841e-06
Cc03_g12510	GSCOC_T00015209001	A0A068U4J9	Hypothetical protein	GO:0016021	AT5G49690	7.59017913231673	2.54690626317931e-05
Cc04_g07150	GSCOC_T00022521001	A0A068TR51	Hypothetical protein			7.5607799163363	1.0789262102464e-27
Cc00_g12860	GSCOC_T00008937001	A0A068VJH1	Putative ABC transporter B family member 9	GO:0016021;GO:0005524;GO:0016887;GO:0042626	AT4G18050	7.5087150827448	1.32439618580152e-05
Cc10_g04010	GSCOC_T00034989001	A0A068TYK3	Hypothetical protein	GO:0048364		7.48228206709183	7.58755529992501e-05
Cc06_g06110	GSCOC_T00043182001	A0A068V4J5	Beta-fructofuranosidase, insoluble isoenzyme 1	GO:0004553;GO:0005975		7.46995344515303	6.95667198979731e-05
Cc00_g05510	GSCOC_T00006857001	A0A068VDT7	Putative ABC transporter B family member 9	GO:0016021;GO:0005524;GO:0016887;GO:0042626	AT4G18050	7.4254549833237	7.00814865518133e-05
Cc09_g03820	GSCOC_T00017499001	A0A068U6U4	12-oxophytodienoate reductase 1	GO:0010181;GO:0016491	AT1G76690	7.39533763120277	5.33546903480284e-31
Cc07_g09470	GSCOC_T00037237001	A0A068U118	Hypothetical protein			7.3552465179765	9.08401141573791e-56
Cc05_g04920	GSCOC_T00035036001	A0A068UU77	Putative Late embryogenesis abundant (LEA) hydroxyproline-rich glycoprotein family	GO:0016021		7.27208348294201	0.00100034222523911
Cc02_g27970	GSCOC_T00025155001	A0A068UHN2	Uncharacterized protein			7.25691103260137	5.20860656545632e-13
Cc06_g01800	GSCOC_T00023414001	A0A068UE99	Putative DUF246 domain-containing protein At1g04910	GO:0016021;GO:0016757;GO:0006004	AT2G37980	7.25522583160992	2.25185605543876e-11
Cc04_g08040	GSCOC_T00022652001	A0A068TT43	Tropinone reductase homolog At1g07440	GO:0016491	AT5G06060	7.2326154033615	2.01958038798514e-05
Cc07_g05950	GSCOC_T00039884001	A0A068U1R7	Putative Multidrug and toxin extrusion protein 1	GO:0016021;GO:0015297;GO:0042910	AT1G58340	7.22760564131459	3.09125522414733e-14
Cc02_g15760	GSCOC_T00014035001	A0A068TLL4	Isoflavone 2'-hydroxylase	GO:0016021;GO:0020037;GO:0005506;GO:0004497;GO:0016705	AT5G36220	7.21466102690394	0.000187002819793724
Cc02_g04750	GSCOC_T00020397001	A0A068UA71	Oleosin 1	GO:0016021;GO:0012511	AT4G25140	7.20365932850242	3.37390899850258e-05
Cc10_g04450	GSCOC_T00034932001	A0A068TYK2	Putative Patatin group A-3	GO:0016787;GO:0016042		6.97617866883107	0.00104439680050529
Cc02_g11470	GSCOC_T00029408001	A0A068TTX8	Serine carboxypeptidase-like 27	GO:0004185	AT3G07990	6.97592283693246	8.34067706369356e-39
Cc06_g02230	GSCOC_T00023472001	A0A068UE77	Hypothetical protein	GO:0016021		6.92019152522635	0.0007948496903295
Cc02_g18120	GSCOC_T00014348001	A0A068TP21	9-divinyl ether synthase	GO:0020037;GO:0005506;GO:0016705		6.90674175177115	0.00106228616805262
Cc00_g04980	GSCOC_T00005519001	A0A3P8MYP6	Hypothetical protein			6.88499919147976	3.11949969564936e-22
Cc00_g20820	GSCOC_T00008930001	A0A068VIV2	Hypothetical protein			6.87124488934801	5.35451256619603e-18
Cc07_g03030	GSCOC_T00039517001	A0A068U3P3	Probable pectate lyase P59	GO:0046872;GO:0030570;GO:0045490		6.79214957706271	0.00334595293029392
Cc01_g08700	GSCOC_T00023904001	A0A068UE89	Momilactone A synthase		AT1G52340	6.76401155104289	2.8260375378028e-30
Cc06_g16230	GSCOC_T00030720001	A0A068UPD7	Transcription factor HBP-1b(c38)	GO:0003700;GO:0043565;GO:0006351		6.75732603660755	0.0017293995134809
Cc02_g04410	GSCOC_T00020353001	A0A068UAN9	Putative Predicted protein			6.72231523888272	0.00176247390049566
Cc07_g07490	GSCOC_T00040098001	A0A068U3B7	1-aminocyclopropane-1-carboxylate synthase 3	GO:0003824;GO:0030170;GO:0009058		6.66504387502368	0.00021573813669106
Cc04_g14100	GSCOC_T00035937001	A0A068UVS7	Putative Probable inactive poly [ADP-ribose] polymerase SRO5	GO:0003950	AT5G62520	6.66346261003012	5.03427733165685e-24
Cc02_g06190	GSCOC_T00039144001	A0A068V260	Putative U-box domain-containing protein 13	GO:0004842		6.6586510392144	0.00269553563068457
Cc06_g05680	GSCOC_T00043130001	A0A068V410	Putative Protein ABSCISIC ACID-INSENSITIVE 5	GO:0005634;GO:0003700;GO:0042803;GO:0043565;GO:0009738;GO:0010152;GO:0045893;GO:0009409;GO:0009651;GO:0009414;GO:0009845		6.62567963947175	0.00022211316168488
Cc03_g03530	GSCOC_T00026043001	A0A068TSU9	Sugar transport protein 8	GO:0016021;GO:0022857	AT5G26250	6.60500236546013	0.000520144415183532
Cc00_g06380	GSCOC_T00004113001	A0A068VE40	Vetispiradiene synthase 1	GO:0000287;GO:0010333		6.59675813099498	0.000482062154186238
Cc02_g10820	GSCOC_T00029487001	A0A068TU33	Cysteine proteinase 15A	GO:0008234		6.57726059411531	0.0038607529738732
Cc11_g10530	GSCOC_T00032565001	A0A068TWE9	C2H2-like zinc finger protein			6.56434177900605	0.000588695259086364
Cc01_g12160	GSCOC_T00028141001	A0A068UL59	Putative exocyst subunit exo70 family protein H7	GO:0000145;GO:0006887;GO:0015031	AT3G55150	6.53872112479843	5.0015596108698e-20
Cc06_g06630	GSCOC_T00031360001	A0A068USI6	E3 ubiquitin-protein ligase PUB22	GO:0004842	AT3G52450	6.52870097519406	1.2560713506468e-05
Cc07_g16150	GSCOC_T00037600001	A0A068UWJ0	Monothiol glutaredoxin-S6	GO:0009055;GO:0015035		6.4680644642642	0.00647667389744541
Cc05_g13770	GSCOC_T00021019001	A0A068UBX2	KDEL-tailed cysteine endopeptidase CEP1	GO:0008234		6.4622318587433	0.000416174610775774
Cc01_g07420	GSCOC_T00030179001	A0A068UMS9	Alcohol dehydrogenase-like 7	GO:0016491;GO:0008270	AT5G42250	6.44021917037517	8.45900337128459e-40
Cc10_g15100	GSCOC_T00033677001	A0A068USL3	Putative uncharacterized protein	GO:0005634;GO:0003677;GO:0003700	AT5G64750	6.40351307213156	6.53449360833207e-05
Cc09_g02250	GSCOC_T00017701001	A0A068U9Q6	Polygalacturonase	GO:0005576;GO:0004650;GO:0005975;GO:0071555		6.39132743369784	0.00328414744308265
Cc04_g02360	GSCOC_T00021907001	A0A068TNP0	Inositol oxygenase 1	GO:0005737;GO:0050113;GO:0005506;GO:0019310	AT1G14520	6.36907915570565	4.63018245157618e-35
Cc01_g08410	GSCOC_T00015547001	A0A068V4Y4	Putative Lysosomal beta glucosidase	GO:0004553;GO:0005975		6.34339327915461	1.33844213208315e-07
Cc02_g13430	GSCOC_T00029158001	A0A068TU92	Putative Predicted protein			6.33877054130098	5.79991077967197e-51
Cc08_g07990	GSCOC_T00007319001	A0A068VHG2	Probable 6-phosphogluconolactonase 4, chloroplastic	GO:0017057;GO:0005975;GO:0006098		6.32868944577099	0.00892930074671337
Cc02_g13110	GSCOC_T00029199001	A0A068TTI1	Putative Stem-specific protein TSJT1			6.3263067674195	5.79009288947354e-24
Cc06_g04040	GSCOC_T00023708001	A0A068UGK8	SAUR-like auxin-responsive protein family	GO:0009733		6.26794977647918	0.00947009539583283
Cc01_g14440	GSCOC_T00028443001	A0A068ULS4	Putative uncharacterized protein	GO:0005524;GO:0004672	AT2G32510	6.25298419397081	5.38751918735032e-14
Cc02_g35350	GSCOC_T00042862001	A0A068V3V7	Putative Uncharacterized protein R707	GO:0047216;GO:0006012	AT2G47180	6.22765478874996	8.84058811791416e-49
Cc11_g11050	GSCOC_T00032490001	A0A068TX63	Putative Protein of unknown function (DUF1262)	GO:0009405		6.09557731020591	0.000209350869111959
Cc05_g13060	GSCOC_T00021109001	A0A068UDW2	(-)-germacrene D synthase	GO:0000287;GO:0010333	AT5G23960	6.0867322361414	1.01935775832238e-12
Cc05_g12500	GSCOC_T00021185001	A0A068UCE6	NAC domain-containing protein 72	GO:0005634;GO:0003677;GO:0006355	AT3G15500	6.05628599891545	1.44718179629438e-58
Cc08_g07460	GSCOC_T00025374001	A0A068UHW7	Premnaspirodiene oxygenase	GO:0020037;GO:0005506;GO:0004497;GO:0016705		6.00858185330473	0.000495489311168795
Cc11_g09980	GSCOC_T00032644001	A0A068TWL1	Putative Universal stress protein A-like protein			5.86649499002795	4.40609412335507e-05
Cc11_g16400	GSCOC_T00038178001	A0A068UYH7	GRAS family transcription factor			5.84741446636816	0.00110065076042168
Cc01_g00040	GSCOC_T00012436001	A0A068VDF3	Benzyl alcohol O-benzoyltransferase	GO:0016747	AT3G03480	5.80492896430274	7.4911038474967e-27
Cc07_g08030	GSCOC_T00040165001	A0A068U536	Transcription factor MYB113	GO:0005634;GO:0003677		5.78519124567807	0.006176989343566
Cc04_g05250	GSCOC_T00022272001	A0A068TQP9	Heat shock 70 kDa protein	GO:0005524	AT3G12580	5.75225522267462	2.76849898832078e-32
Cc02_g39250	GSCOC_T00027744001	A0A068UKH5	Long chain acyl-CoA synthetase 4	GO:0003824	AT4G23850	5.69407826326565	8.20054254261556e-09
Cc06_g06090	GSCOC_T00043180001	A0A068V4E5	Beta-fructofuranosidase, insoluble isoenzyme 1	GO:0004553;GO:0005975	AT3G52600	5.67781916889629	9.8004789457945e-06
Cc10_g05350	GSCOC_T00034820001	A0A068TYC8	Putative Isoflavone 2'-hydroxylase	GO:0020037;GO:0005506;GO:0004497;GO:0016705		5.67653996862483	0.00879755414566039
Cc07_g00180	GSCOC_T00019082001	A0A068V753	Hypothetical protein			5.66981963533915	0.0050058683558707
Cc02_g16600	GSCOC_T00014153001	A0A068TL51	Snakin-2			5.66777498153536	0.0015831167707082
Cc03_g07610	GSCOC_T00026616001	A0A068TTQ9	Putative Predicted protein	GO:0009737		5.5547215486255	0.00895713079234597
Cc03_g12230	GSCOC_T00015260001	A0A068U5L7	Desiccation-related protein PCC13-62			5.54498524000383	4.78884044919715e-11
Cc02_g11510	GSCOC_T00029403001	Q98IV5	MLO-like protein 6	GO:0016021;GO:0005516;GO:0006952;GO:0009607	AT1G61560	5.53693851296678	1.07800594902843e-28
Cc07_g05000	GSCOC_T00039761001	A0A068U1I0	Putative Protein GAMETE EXPRESSED 3		AT5G16020	5.53348387342801	4.97428468297771e-06
Cc07_g10030	GSCOC_T00037166001	Q1A524	Dehydrin DH1a	GO:0009415	AT3G50980	5.52831395298701	4.35409100362994e-19
Cc01_g10130	GSCOC_T00024094001	A0A068UH90	Histone H2B.2	GO:0000786;GO:0005634;GO:0003677;GO:0046982	AT1G08170	5.51597639502779	8.89813869753339e-14
Cc02_g19470	GSCOC_T00014515001	A0A068TPG8	Indole-3-acetic acid-amido synthetase GH3.3		AT2G23170	5.50390317644922	5.70609798168439e-08
Cc05_g06110	GSCOC_T00009865001	A0A068VI38	Beta-amylase	GO:0102229;GO:0016161;GO:0000272	AT4G15210	5.46459298098014	4.33452683797692e-10
Cc02_g08150	GSCOC_T00029839001	A0A068TVI8	delta(3), delta(2)-enoyl CoA isomerase 1	GO:0003824	AT1G65520	5.45555981556848	1.08808365621936e-14
Cc03_g06560	GSCOC_T00026456001	A0A068TTG3	Putative Transcription factor MYB48	GO:0003677	AT5G59780	5.4480758981534	0.000855346953135022
Cc06_g16520	GSCOC_T00030679001	A0A068UNG8	Hypothetical protein	GO:0016021		5.41436843960947	2.25913144560288e-19
Cc07_g14740	GSCOC_T00036573001	A0A068TYW8	Peroxidase 17	GO:0005829;GO:0005576;GO:0009505;GO:0020037;GO:0046872;GO:0004601;GO:0042744;GO:0009809;GO:0006979;GO:0010228	AT2G22420	5.40565117078903	3.9087438441819e-17
Cc02_g21350	GSCOC_T00014775001	A0A068TMG4	Putative UDP-glycosyltransferase 85A3	GO:0008194	AT1G22360	5.40433854041229	2.82147041123933e-39
Cc09_g10820	GSCOC_T00040998001	A0A068V1F0	Putative Bifunctional dihydroflavonol 4-reductase/flavanone 4-reductase	GO:0005783;GO:0003824;GO:0048316;GO:0080110	AT4G35420	5.38931843430848	2.02910034324256e-06
Cc09_g10000	GSCOC_T00041102001	A0A068V3W7	Putative Protein of unknown function, DUF584			5.36351854628509	1.48323670421786e-12
Cc03_g04970	GSCOC_T00026229001	A0A068TV46	Inhibitor of trypsin and hageman factor	GO:0004867;GO:0009611		5.36305822502553	0.003987095066644
Cc02_g11220	GSCOC_T00029439001	A0A068TTZ6	Transketolase, chloroplastic	GO:0004802	AT3G60750	5.35042227614661	1.2989629183723e-16
Cc04_g04040	GSCOC_T00022121001	A0A068TRZ8	Late embryogenesis abundant protein Dc3		AT1G52690	5.33575397529302	3.26462713491529e-14
Cc02_g35340	GSCOC_T00042863001	A0A068V5V2	Putative UDP-glucuronate	GO:0047216;GO:0006012	AT2G47180	5.32680499246227	3.43386207655231e-28
Cc11_g06900	GSCOC_T00020723001	A0A068UBF6	Mitochondrial import inner membrane translocase subunit Tim17	GO:0016021		5.30585300659476	0.00433040990251331
Cc02_g13580	GSCOC_T00029130001	A0A068TU76	Putative Late embryogenesis abundant protein (LEA) family protein			5.28980491226833	0.00111770484229907
Cc01_g07410	GSCOC_T00030177001	A0A068UMJ3	Alcohol dehydrogenase-like 7	GO:0016491;GO:0008270	AT5G42250	5.23907193065333	3.72174550271857e-15
Cc02_g20300	GSCOC_T00014641001	A0A068TM85	Pathogenesis-related leaf protein 4	GO:0005576	AT2G14580	5.23479972955213	3.92676703746944e-10
Cc03_g10010	GSCOC_T00031000001	A0A068UPG0	Putative Rho GDP-dissociation inhibitor 2	GO:0005737;GO:0005094	AT3G07880	5.22218991027699	6.47061633659204e-11
Cc06_g18250	GSCOC_T00040432001	A0A068V0A7	Probable glutathione S-transferase parC		AT1G78380	5.18070885822716	9.4915839095409e-06
Cc10_g08360	GSCOC_T00034397001	A0A068TXA9	unknown protein; FUNCTIONS IN	GO:0005886		5.1581699510191	4.0737550453812e-08
Cc01_g12850	GSCOC_T00028236001	A0A068UN50	Metallothionein 1 (Fragment)	GO:0046872	AT5G02380	5.15503509984736	0.00975251525578081
Cc06_g06080	GSCOC_T00043179001	A0A068V450	Beta-fructofuranosidase, insoluble isoenzyme 1	GO:0004553;GO:0005975	AT2G36190	5.13474839972644	1.9020200815156e-07
Cc10_g02520	GSCOC_T00024756001	A0A068UGS7	Putative Sec14 cytosolic factor		AT4G39170	5.12511058407282	5.99700138415036e-09
Cc00_g11660	GSCOC_T00004163001	A0A068VGK6	Pathogenesis-related protein P2	GO:0042742;GO:0050832	AT3G04720	5.11814283863323	6.58610022686188e-22
Cc01_g08270	GSCOC_T00015527001	A0A068V6R7	Alcohol dehydrogenase-like 7	GO:0016491;GO:0008270	AT5G42250	5.1116491654221	1.58871923397632e-05
Cc02_g22540	GSCOC_T00014927001	A0A068TMH8	3-ketoacyl-CoA synthase 7	GO:0016021;GO:0016747;GO:0006633		5.10363467295824	0.00924615225245178
Cc01_g13400	GSCOC_T00028306001	A0A068UNB2	Protein phosphatase 2C 37	GO:0046872;GO:0004722	AT2G29380	5.08672278542353	1.66632433717082e-23
Cc06_g03920	GSCOC_T00023692001	A0A068UE60	Putative uncharacterized protein			5.07224584091471	4.19871622943592e-09
Cc08_g16010	GSCOC_T00035549001	A0A068UUR7	Putative highly ABA-induced PP2C gene 2	GO:0046872;GO:0004722	AT5G59220	5.07110659248026	3.13356895217395e-09
Cc07_g11420	GSCOC_T00037003001	A0A068U0J4	IQ-domain 20	GO:0005730;GO:0005886;GO:0005516;GO:0051592	AT1G74690	5.05425451216711	1.8877483627353e-10
Cc01_g20130	GSCOC_T00015970001	A0A068U7G8	Hypothetical protein			5.04053332075708	0.00237436858158776
Cc01_g08300	GSCOC_T00015533001	A0A068V4N0	Alcohol dehydrogenase-like 7	GO:0016491;GO:0008270	AT5G42250	5.02972136960107	0.000336801906320794
Cc10_g15150	GSCOC_T00033683001	A0A068USL8	Peroxidase 12	GO:0005576;GO:0020037;GO:0046872;GO:0004601;GO:0042744;GO:0006979	AT1G71695	5.02110401670462	1.38403198237594e-20
Cc00_g33840	GSCOC_T00008105001	A0A068VMZ5	Putative uncharacterized protein	GO:0006952		5.01675001106808	0.00363880392701638
Cc01_g04080	GSCOC_T00039275001	A0A068V091	Putative Long-chain-fatty-acid--AMP ligase FadD28	GO:0016021;GO:0004096;GO:0020037;GO:0031177;GO:0008610;GO:0006979		5.00189944185639	0.00542729718225734
Cc05_g15260	GSCOC_T00038712001	A0A068UYV9	RING/U-box superfamily protein	GO:0016021	AT1G22500	4.99366891413682	1.21204887227128e-29
Cc06_g01030	GSCOC_T00023309001	A0A068UDU2	Putative UPF0098 protein MTH_273			4.98159913558063	2.93103405822884e-07
Cc10_g01190	GSCOC_T00024586001	A0A068UGL6	Pentatricopeptide repeat-containing protein At1g20230	GO:0008270	AT1G20230	4.949879746277	0.00372941691209344
Cc01_g21240	GSCOC_T00005004001	A0A068V9A2	Putative unknown protein; FUNCTIONS IN			4.92117995606121	8.02132057947516e-11
Cc06_g03160	GSCOC_T00023591001	A0A068UDN4	exocyst subunit exo70 family protein H4	GO:0000145;GO:0006887;GO:0015031	AT3G55150	4.91347530039817	5.85120040535824e-10
Cc02_g13150	GSCOC_T00029193001	A0A068TU48	Putative pre-mRNA-splicing factor ATP-dependent RNA helicase DHX16		AT1G32490	4.88591767171598	0.00114074932392988
Cc02_g03240	GSCOC_T00020200001	A0A068U9L8	CEN-like protein 1		AT5G62040	4.88282622847641	0.00200058694402599
Cc10_g03180	GSCOC_T00024840001	A0A068UIU3	Putative uncharacterized protein			4.87578114636806	0.000115064342152585
Cc04_g08100	GSCOC_T00022658001	A0A068TRF5	Tropinone reductase homolog At1g07440	GO:0016491	AT5G06060	4.87107959475437	4.83449306442392e-15
Cc00_g15700	GSCOC_T00006886001	A0A068VKD9	Putative Monoglyceride lipase			4.85761855295955	7.85524872175983e-20
Cc06_g08580	GSCOC_T00031111001	A0A068URZ5	Nitrate transporter 1.4	GO:0016021;GO:0022857;GO:0006857	AT2G26690	4.83355608600457	2.95066616282051e-06
Cc01_g00360	GSCOC_T00012396001	A0A068VDA0	L-ascorbate oxidase homolog	GO:0005507;GO:0016491	AT5G51480	4.80366835708352	0.0019480854888752
Cc11_g08920	GSCOC_T00032811001	A0A068TXI8	unknown protein; BEST Arabidopsis thaliana protein match is	GO:0016021		4.8030232431453	1.59334816344957e-06
Cc11_g01380	GSCOC_T00019574001	A0A068U8M8	Putative unknown protein; FUNCTIONS IN			4.7999046973946	4.05315784022544e-11
Cc02_g18840	GSCOC_T00014441001	A0A068TLL3	Putative uncharacterized protein			4.7480663695696	4.08728063645749e-22
Cc10_g01560	GSCOC_T00024633001	A0A068UFY5	Thaumatin-like protein 1		AT5G38280	4.74407443225536	4.01813390629417e-15
Cc08_g08470	GSCOC_T00009040001	A0A068VCL0	Putative Dehydration-responsive protein RD22	GO:0005768;GO:0005802;GO:0009651	AT5G25610	4.73806374543064	1.5082256755652e-05
Cc02_g29550	GSCOC_T00018392001	A0A068V7I7	Putative 3-hydroxyacyl-CoA dehydratase 1	GO:0003824		4.7219866720714	9.85419589277068e-08
Cc02_g39190	GSCOC_T00027750001	A0A068UJL9	alpha/beta-Hydrolases superfamily protein	GO:0008970;GO:0006629		4.71934733459094	0.00239849666903062
Cc07_g11100	GSCOC_T00037039001	A0A068U108	Heavy metal-associated isoprenylated plant protein 26	GO:0046872;GO:0030001	AT5G66110	4.69996897307204	5.54934269698392e-17
Cc07_g13660	GSCOC_T00036709001	A0A068U1Y0	Geraniol dehydrogenase 1	GO:0016491;GO:0008270	AT4G37990	4.68641527212661	0.00234219324102236
Cc04_g16290	GSCOC_T00035715001	A0A068UVF5	NAC domain-containing protein 100	GO:0005634;GO:0003677;GO:0006355	AT5G61430	4.68489036670684	3.17223225190158e-08
Cc02_g25390	GSCOC_T00028752001	A0A068UMD0	Uncharacterized protein At1g28695		AT1G28695	4.65599662628148	1.30666203212885e-05
Cc00_g16640	GSCOC_T00013787001	A0A068VI18	Phosphate transporter PHO1 homolog 10	GO:0016021;GO:0005886	AT1G69480	4.65282486668857	4.32725576982339e-05
Cc07_g02840	GSCOC_T00039493001	A0A068U223	Hypothetical protein	GO:0045168		4.64977998608239	0.00427328123149621
Cc11_g14010	GSCOC_T00032115001	A0A068TY24	Probable galacturonosyltransferase-like 9	GO:0016021;GO:0016757	AT1G70090	4.64199977692592	6.80535986239582e-17
Cc01_g17670	GSCOC_T00016295001	A0A068U6K6	Ammonium transporter 1 member 2	GO:0016021;GO:0008519	AT4G28700	4.6292007151721	0.001517370642907
Cc01_g04030	GSCOC_T00040852001	A0A068V1N7	Putative G-type lectin S-receptor-like serine/threonine-protein kinase RLK1	GO:0005524;GO:0004672;GO:0048544	AT1G34300	4.61135268948369	0.00194833264712939
Cc07_g05600	GSCOC_T00039837001	A0A068U1N2	Polyneuridine-aldehyde esterase		AT2G23620	4.59913811457699	7.34693255736488e-21
Cc07_g19660	GSCOC_T00018531001	A0A068U7S1	Isoflavone 2'-hydroxylase	GO:0016021;GO:0020037;GO:0005506;GO:0004497;GO:0016705	AT3G28740	4.59516510383868	2.26916632278755e-09
Cc00_g05500	GSCOC_T00006856001	A0A068VGA1	Hypothetical protein	GO:0016021;GO:0005524	AT4G18050	4.59157756169109	3.81019848528471e-22
Cc03_g03470	GSCOC_T00026033001	A0A068TUK1	Putative unknown protein; BEST Arabidopsis thaliana protein match is			4.57076340946668	3.02291823678137e-13
Cc02_g26920	GSCOC_T00025001001	A0A068UHF8	Putative uncharacterized protein	GO:0016021		4.5482131784075	1.90157846741372e-19
Cc01_g13170	GSCOC_T00028280001	A0A068UKM0	Hypothetical protein	GO:0032875	AT5G02220	4.53977117869993	4.1404197148011e-07
Cc04_g04030	GSCOC_T00022120001	A0A068TQ29	Hypothetical protein			4.53219856066934	2.78800606304375e-06
Cc07_g04990	GSCOC_T00039760001	A0A068U2I9	Probable isoprenylcysteine alpha-carbonyl methylesterase ICMEL2	GO:0016021;GO:0016787	AT3G02410	4.4405979031025	2.41657737034411e-37
Cc04_g07360	GSCOC_T00022550001	A0A068TQ54	Putative Protein ASPARTIC PROTEASE IN GUARD CELL 1	GO:0004190;GO:0009737;GO:0009414	AT3G18490	4.42317598580264	5.12207645381126e-18
Cc02_g22570	GSCOC_T00014932001	A0A068TQB0	Putative RmlC-like cupins superfamily protein	GO:0045735		4.41532080644129	0.00840707832778292
Cc01_g13250	GSCOC_T00028289001	A0A068UN94	Putative Homeodomain-like superfamily protein	GO:0005634;GO:0003677	AT5G59570	4.39263159134933	4.31592856740099e-07
Cc06_g08260	GSCOC_T00031153001	A0A068UPG1	Putative Umecyanin	GO:0016021;GO:0009055	AT5G20230	4.36745879568006	0.000353544158328283
Cc06_g19560	GSCOC_T00029023001	A0A068UM25	Putative UDP-glucose flavonoid 3-O-glucosyltransferase 3	GO:0008194		4.34549446642166	0.00508852158136468
Cc08_g16730	GSCOC_T00035644001	A0A068UX94	Protein of unknown function, DUF538			4.34386631952235	9.40413835042754e-05
Cc05_g04090	GSCOC_T00031589001	A0A068UT29	mitogen-activated protein kinase kinase kinase 18	GO:0005524;GO:0004674	AT1G05100	4.31699435686603	2.15384700659704e-08
Cc00_g14920	GSCOC_T00001123001	A0A068VK52	Germin-like protein 1-2	GO:0048046;GO:0005618;GO:0030145;GO:0045735	AT1G18970	4.31121702211445	1.70538829798507e-15
Cc02_g38650	GSCOC_T00027834001	A0A068UKL6	Putative Late embryogenesis abundant (LEA) hydroxyproline-rich glycoprotein family	GO:0016021;GO:0005886		4.29578546075688	5.12207645381126e-18
Cc05_g00090	GSCOC_T00017027001	A0A068V7Z0	unknown protein; BEST Arabidopsis thaliana protein match is			4.29044146777613	1.18983784942708e-10
Cc03_g02620	GSCOC_T00025917001	A0A068TUB6	inosine-uridine preferring nucleoside hydrolase family protein			4.27052489174679	3.16510817751913e-15
Cc05_g16100	GSCOC_T00038605001	A0A068UYV3	Putative SBP (S-ribonuclease binding protein) family protein	GO:0005634;GO:0043067	AT3G12920	4.25523837686942	1.16335516554867e-05
Cc03_g05190	GSCOC_T00026267001	A0A068TSG1	1-aminocyclopropane-1-carboxylate oxidase homolog 3	GO:0046872;GO:0016491	AT1G06650	4.24527140905108	3.47970401147169e-06
Cc02_g07880	GSCOC_T00029879001	A0A068TVW2	Putative ENTH/VHS family protein			4.22056662518175	1.92657762086388e-05
Cc09_g07410	GSCOC_T00036265001	A0A068UWE8	Reticuline oxidase-like protein	GO:0071949;GO:0016491	AT1G30700	4.21719160772609	7.76333694714614e-08
Cc02_g03520	GSCOC_T00020237001	A0A068UCB0	peptidoglycan-binding LysM domain-containing protein	GO:0016021		4.21068641852574	3.84759463822844e-11
Cc05_g11470	GSCOC_T00021311001	A0A068UCH1	Putative sodium/calcium exchanger family protein / calcium-binding EF hand family protein	GO:0016021;GO:0005509;GO:0055085		4.19749898033933	1.6859208839658e-18
Cc02_g00930	GSCOC_T00019895001	A0A068U9X5	Putative uncharacterized protein	GO:0005634;GO:0005524;GO:0032502;GO:0006355;GO:0006351	AT4G37740	4.19257621818007	3.72174550271857e-15
Cc03_g04540	GSCOC_T00026176001	A0A068TS64	3-ketoacyl-CoA synthase 17	GO:0016021;GO:0016747;GO:0006633	AT1G04220	4.1923067630302	0.000557355966941009
Cc11_g04430	GSCOC_T00004787001	A0A068V8I5	Hypothetical protein			4.18762984491619	0.00130321872948537
Cc06_g13940	GSCOC_T00041327001	A0A068U410	EG45-like domain containing protein		AT4G30380	4.14112474755094	3.92770657776122e-13
Cc02_g39970	GSCOC_T00027635001	A0A068UK04	Late embryogenesis abundant (LEA) hydroxyproline-rich glycoprotein family	GO:0016021		4.13336616893453	4.05489280919035e-06
Cc06_g10620	GSCOC_T00041755001	A0A068U437	Putative oxidative stress 3			4.13312943764272	3.72174550271857e-15
Cc06_g18280	GSCOC_T00040435001	A0A068V2W8	Glucan endo-1,3-beta-glucosidase, acidic isoform PR-Q'	GO:0004553;GO:0005975	AT4G16260	4.10565065235101	6.02171798619851e-22
Cc08_g16780	GSCOC_T00035651001	A0A068UX97	Putative uncharacterized protein	GO:0005634;GO:0043565;GO:0006355	AT2G46680	4.09688184903179	1.84465898346687e-26
Cc08_g01050	GSCOC_T00038435001	A0A068V0Q6	Chalcone-flavanone isomerase family protein	GO:0009570;GO:0005504;GO:0016872	AT2G26310	4.09160341036406	5.11781529986292e-06
Cc02_g00920	GSCOC_T00019893001	A0A068UBI1	Putative IQ-domain 18			4.0674267044968	0.00292210336661212
Cc11_g08170	GSCOC_T00032911001	A0A068TXN8	Putative 21 kDa protein	GO:0004857	AT4G25260	4.05512054478914	4.04561475266059e-10
Cc00_g04190	GSCOC_T00006614001	A0A068VCK3	60S ribosomal protein L10-2	GO:0005840;GO:0003735;GO:0006412	AT1G26910	4.02979406485877	2.4555491837521e-09
Cc06_g13830	GSCOC_T00041341001	A0A068U2Y8	Probable alpha,alpha-trehalose-phosphate synthase [UDP-forming] 11	GO:0005829;GO:0005739;GO:0003824;GO:0005992	AT2G18700	3.99509289479544	2.00446754385191e-15
Cc10_g06230	GSCOC_T00034687001	A0A068U0M0	Laccase-14	GO:0048046;GO:0005507;GO:0052716;GO:0046274	AT5G09360	3.99351217905514	5.76069989969176e-18
Cc05_g08100	GSCOC_T00016821001	A0A068V5V7	unknown protein; FUNCTIONS IN	GO:0016021	AT2G31090	3.98787431036564	4.87618128954911e-08
Cc01_g01870	GSCOC_T00019259001	A0A068V8A1	Pre-mRNA-processing-splicing factor 8	GO:0005681;GO:0030623;GO:0017070;GO:0000398	AT1G80070	3.98714370000279	1.10133743450551e-09
Cc11_g13890	GSCOC_T00032127001	A0A068TVE9	Putative Predicted protein	GO:0016021;GO:0045168	AT3G28455	3.98694321730108	0.000691919977758448
Cc02_g25740	GSCOC_T00028706001	A0A068UM98	Putative Phosphorylated carbohydrates phosphatase TM_1254	GO:0016787	AT2G38740	3.95779197161315	7.31050220666434e-13
Cc10_g07290	GSCOC_T00034542001	A0A068TYA3	Putative Probable LRR receptor-like serine/threonine-protein kinase At4g08850	GO:0016021;GO:0005524;GO:0004672	AT4G08850	3.94539468282803	3.16879535019359e-05
Cc01_g17750	GSCOC_T00016287001	A0A068U5P6	Putative uncharacterized protein	GO:0016021		3.93751883055096	4.76281553730147e-05
Cc02_g23140	GSCOC_T00014996001	A0A068TMN8	Protein of unknown function (DUF679)	GO:0016021	AT3G02430	3.89577193798183	0.0018309805242105
Cc11_g11380	GSCOC_T00032451001	A0A068TW51	Putative Redox-regulatory protein FAM213A	GO:0055114		3.89126266811572	1.73236900702305e-09
Cc00_g04970	GSCOC_T00005517001	A0A068VCC7	Hypothetical protein			3.89126238524672	2.99561850179096e-12
Cc02_g34800	GSCOC_T00011787001	A0A068VEX7	Putative Protein of unknown function (DUF1645)			3.85442229215566	0.00144047307781325
Cc06_g08250	GSCOC_T00031154001	A0A068UPR3	Putative Early nodulin-like protein 1	GO:0009055	AT5G20230	3.7837357346334	0.000775981252401463
Cc07_g04870	GSCOC_T00039748001	A0A068U231	Proline dehydrogenase 2, mitochondrial	GO:0004657;GO:0006562	AT5G38710	3.77918627732289	9.33964091534233e-08
Cc02_g17270	GSCOC_T00014237001	Q1A522	Putative Late embryogenesis abundant protein	GO:0005829;GO:0009415	AT2G21490	3.76748386518037	5.8821587838576e-05
Cc01_g20380	GSCOC_T00015940001	A0A068U7E4	Glutaredoxin-C11	GO:0009055;GO:0015035	AT3G62950	3.76033843224003	0.000234978462192928
Cc07_g13290	GSCOC_T00036762001	A0A068TZC2	Glutamine synthetase cytosolic isozyme 2	GO:0005524;GO:0004356;GO:0006542	AT5G37600	3.74151360992646	3.97196991402179e-06
Cc02_g22890	GSCOC_T00014967001	A0A068TML3	COBRA-like protein 6	GO:0031225;GO:0010215	AT1G09790	3.7229808080653	6.78249509982596e-11
Cc04_g10090	GSCOC_T00042546001	A0A068V2X5	Putative unknown protein; BEST Arabidopsis thaliana protein match is			3.71696612926812	1.59465617220148e-08
Cc00_g32800	GSCOC_T00001453001	A0A068VMD5	unknown protein; FUNCTIONS IN			3.71005895562995	8.32592622301409e-05
Cc08_g15170	GSCOC_T00035443001	A0A068UUU1	Heat shock protein 83	GO:0005524;GO:0051082;GO:0006457	AT5G56000	3.70620074135151	9.75385363074772e-07
Cc02_g23670	GSCOC_T00015069001	A0A068TQM6	22.7 kDa class IV heat shock protein		AT4G10250	3.67145540080368	1.80270597519836e-10
Cc08_g10740	GSCOC_T00027051001	A0A068UKZ8	Beta-fructofuranosidase, insoluble isoenzyme CWINV1	GO:0004553;GO:0005975	AT3G13790	3.67009640003235	1.77204079842158e-13
Cc09_g03240	GSCOC_T00017575001	A0A068U7W6	Putative F-box protein At2g02240		AT2G02240	3.65630470064572	1.30271942916399e-12
Cc04_g15690	GSCOC_T00042345001	A0A068V2T3	Putative Ent-kaurenoic acid oxidase 1	GO:0016021;GO:0020037;GO:0005506;GO:0016705		3.65513272353906	0.00342125446484625
Cc11_g07780	GSCOC_T00018006001	A0A068V707	Pathogenesis-related protein R major form		AT4G11650	3.65224843060878	1.75600996850623e-10
Cc06_g03490	GSCOC_T00023633001	A0A068UGH3	L-ascorbate peroxidase 2, cytosolic	GO:0005829;GO:0020037;GO:0004601;GO:0006979	AT3G09640	3.64929286679111	0.00615395244019536
Cc04_g12840	GSCOC_T00003258001	A0A068VDL8	Putative U-box domain-containing protein 19	GO:0004842	AT1G60190	3.6403725165527	3.22854479195508e-11
Cc07_g04880	GSCOC_T00039749001	A0A068U440	Putative zinc finger (C3HC4-type RING finger) family protein / BRCT domain-containing protein	GO:0046872		3.63089951421204	0.0022720366305166
Cc07_g01010	GSCOC_T00019186001	A0A068VAP7	GRAS family transcription factor		AT3G54220	3.61422347681254	1.76412947531363e-05
Cc02_g19820	GSCOC_T00014558001	A0A068TPJ4	Putative Uncharacterized protein			3.61227306868242	0.00120444168773364
Cc05_g12750	GSCOC_T00021150001	A0A068UCC4	Protein of unknown function (DUF1223)			3.61047560664688	8.01352957776134e-11
Cc02_g11090	GSCOC_T00029455001	A0A068TWP6	Probable receptor-like protein kinase At5g15080	GO:0005524;GO:0004672	AT3G09830	3.60431593424629	6.84694083810172e-15
Cc06_g19200	GSCOC_T00028972001	A0A068UMT2	Transmembrane amino acid transporter family protein	GO:0016021	AT2G41190	3.60164653729513	4.44101282805361e-10
Cc10_g04110	GSCOC_T00034975001	A0A068TYJ4	Putative cold regulated gene 27			3.58212687302367	4.02264517551361e-12
Cc02_g18150	GSCOC_T00014351001	A0A068TLK6	Putative Myosin heavy chain kinase B		AT2G26490	3.57047773218537	7.89071755487091e-17
Cc03_g04200	GSCOC_T00026129001	A0A068TS74	Putative uncharacterized protein			3.54161174434614	2.95041238392668e-11
Cc08_g07660	GSCOC_T00025409001	A0A068UHY7	Putative VQ motif-containing protein			3.53850569478798	0.000378408412083592
Cc10_g05420	GSCOC_T00034807001	A0A068TZA1	Putative Isoflavone 2'-hydroxylase	GO:0016021;GO:0020037;GO:0005506;GO:0004497;GO:0016705		3.52974798430745	0.00458593258136252
Cc06_g16680	GSCOC_T00030651001	A0A068UP86	Putative polyol transporter 1	GO:0016021;GO:0022857	AT2G16120	3.52662225180002	1.11527794337836e-06
Cc04_g16330	GSCOC_T00035719001	A0A068UV56	Thioredoxin-like 1-2, chloroplastic		AT5G61440	3.48130127171855	2.60609026553876e-07
Cc06_g09070	GSCOC_T00041969001	A0A068U4F9	3-ketoacyl-CoA synthase 11	GO:0016021;GO:0016747;GO:0006633	AT2G26640	3.46979084833876	2.58277734984872e-10
Cc03_g03550	GSCOC_T00026046001	A0A068TRZ4	Sugar transport protein 13	GO:0016021;GO:0022857	AT5G26340	3.46790031211091	2.50596374698493e-14
Cc04_g14520	GSCOC_T00040694001	A0A068V0P0	L-type lectin-domain containing receptor kinase IV.2	GO:0016021;GO:0005524;GO:0030246;GO:0004672	AT2G37710	3.45584023825401	2.21043813088358e-12
Cc05_g01900	GSCOC_T00015780001	A0A068V796	Putative Uncharacterized membrane protein At3g27390	GO:0016021	AT3G27390	3.41482006028858	6.74536452310771e-12
Cc07_g08170	GSCOC_T00040181001	A0A068U365	unknown protein; Has 30201 Blast hits to 17322 proteins in 780 species	GO:0016021		3.38195799803264	0.002090346716625
Cc06_g02060	GSCOC_T00023446001	A0A068UDB6	Putative Encodes a protein involved in salt tolerance, names SIS (Salt Induced Serine rich).	GO:0009651		3.38073985408834	5.25696422498281e-09
Cc03_g06550	GSCOC_T00026453001	A0A068TSW8	AWPM-19-like family protein	GO:0016021		3.37357481454803	0.00835304647305754
Cc11_g10990	GSCOC_T00032499001	A0A068TW53	Putative unknown protein; LOCATED IN	GO:0016021		3.35646756581149	0.0039727996525931
Cc08_g11890	GSCOC_T00030559001	A0A068UN96	Oleosin Bn-III	GO:0016021;GO:0012511	AT4G25140	3.35221292286239	3.70373873114494e-06
Cc06_g15450	GSCOC_T00030823001	A0A068UPJ4	Putative uncharacterized protein	GO:0016021;GO:0005524;GO:0008061;GO:0004672;GO:0005975	AT1G65790	3.35153442642983	2.78170230829499e-06
Cc06_g16930	GSCOC_T00004149001	A0A068VCV4	Transcription factor	GO:0016602;GO:0003677;GO:0003700	AT1G30500	3.3475392190819	3.2074271912305e-05
Cc02_g14460	GSCOC_T00013857001	A0A068TLB2	GDSL esterase/lipase At5g45920		AT5G45920	3.34703643780544	0.00351712497425251
Cc11_g17220	GSCOC_T00038282001	A0A068UY71	unknown protein; BEST Arabidopsis thaliana protein match is	GO:0016021		3.34451844443242	5.1058848291158e-09
Cc06_g09660	GSCOC_T00041885001	A0A068U4V7	Putative uncharacterized protein	GO:0042025;GO:0005634;GO:0003700;GO:0043565	AT3G24520	3.33868189839348	4.05254054075089e-17
Cc00_g21580	GSCOC_T00006599001	A0A068VJK9	Putative Systemic acquired resistance protein SAR			3.33316526742551	7.89894857817683e-08
Cc09_g10840	GSCOC_T00040996001	Q07351	Monosaccharide-sensing protein 2	GO:0016021;GO:0022857;GO:0016021;GO:0022857;GO:0008643	AT4G35300	3.33282371674699	4.19871622943592e-09
Cc02_g12550	GSCOC_T00029269001	A0A068TUC2	Putative Protein of unknown function (DUF761)	GO:0016021		3.33017694995816	3.11798682056176e-13
Cc11_g09140	GSCOC_T00032777001	A0A068TWS0	Putative Probable S-adenosylmethionine-dependent methyltransferase At5g37990	GO:0008168	AT5G38780	3.32981570925092	0.00718601052697569
Cc10_g00570	GSCOC_T00024513001	A0A068UG90	Catalase	GO:0004096;GO:0020037;GO:0046872;GO:0042744;GO:0006979	AT4G35090	3.32432813829308	6.84694083810172e-15
Cc04_g07380	GSCOC_T00022554001	A0A068TQZ0	Putative Protein ASPARTIC PROTEASE IN GUARD CELL 1	GO:0004190;GO:0009737;GO:0009414	AT3G18490	3.29865325245619	3.32997152003132e-08
Cc04_g07390	GSCOC_T00022556001	A0A068TSY5	Actin-related protein 4		AT1G18450	3.29010696493459	0.00826564765522529
Cc07_g08370	GSCOC_T00040209001	A0A068U377	Putative unknown protein; FUNCTIONS IN			3.25989407771287	1.02964084853275e-05
Cc00_g13040	GSCOC_T00010496001	A0A068VGJ4	Mitochondrial import inner membrane translocase subunit Tim17/Tim22/Tim23 family protein			3.25275140593591	2.47898407406216e-07
Cc00_g11670	GSCOC_T00004164001	A0A068VJ77	Pathogenesis-related protein P2	GO:0042742;GO:0050832	AT3G04720	3.2492647081033	6.7015312259808e-09
Cc07_g13110	GSCOC_T00036787001	A0A068U241	Putative Ethylene-responsive transcription factor 15	GO:0005634;GO:0003677;GO:0003700	AT3G23240	3.23504714911932	3.10837733533538e-10
Cc06_g13950	GSCOC_T00041325001	A0A068U5L0	EG45-like domain containing protein		AT4G30380	3.22193365414657	0.000760276155172132
Cc09_g01430	GSCOC_T00017812001	A0A068U7A5	WRKY transcription factor 6	GO:0005634;GO:0003700;GO:0043565	AT1G62300	3.21764574142362	1.90213808587018e-14
Cc06_g16940	GSCOC_T00004150001	A0A068VD56	Hypothetical protein			3.21713582623211	4.33895078822849e-05
Cc02_g02070	GSCOC_T00020051001	A0A068UBU1	Acidic endochitinase SE2	GO:0004553;GO:0005975	AT5G24090	3.21521266120137	5.38406808871233e-06
Cc08_g01860	GSCOC_T00037639001	A0A068UWL4	Expansin-like B1	GO:0005576	AT4G17030	3.21026619691009	0.00480270416563792
Cc02_g37120	GSCOC_T00028035001	A0A068UKR7	Putative peptidoglycan-binding LysM domain-containing protein	GO:0016021		3.18464197411348	2.30254320768083e-07
Cc09_g00130	GSCOC_T00017988001	P54645	6-phosphofructokinase 2	GO:0005737;GO:0003872;GO:0005524;GO:0046872;GO:0006002	AT5G47810	3.18168788832858	7.72881922161624e-08
Cc02_g13700	GSCOC_T00029111001	A0A068TTX6	Putative Ethylene-responsive transcription factor 4	GO:0005634;GO:0003677;GO:0003700	AT5G44210	3.17906334898633	1.61489023236187e-12
Cc05_g04680	GSCOC_T00007009001	A0A068VFT8	L-ascorbate oxidase homolog	GO:0005507;GO:0016491	AT4G12420	3.17792470955646	5.99696327029484e-06
Cc03_g05410	GSCOC_T00026292001	A0A068TT86	Ethylene-responsive transcription factor 1B	GO:0005634;GO:0003677;GO:0003700	AT3G23240	3.17768298985187	8.61109228970729e-05
Cc06_g19190	GSCOC_T00028971001	A0A068UPK0	Putative Vesicular GABA transporter	GO:0016021	AT2G41190	3.1769187750059	1.09031704919947e-10
Cc09_g01340	GSCOC_T00017824001	A0A068U8A5	Core-2/I-branching beta-1,6-N-acetylglucosaminyltransferase family protein	GO:0016020		3.17202077700941	4.06541979029435e-12
Cc06_g14110	GSCOC_T00041300001	A0A068U3J2	tetraspanin8	GO:0016021	AT2G23810	3.16944566773533	1.43523960285305e-14
Cc01_g09030	GSCOC_T00023944001	A0A068UGX8	Hypothetical protein	GO:0016021		3.16770637592007	3.58273496578984e-05
Cc06_g10870	GSCOC_T00041724001	A0A068U418	Meiotic nuclear division protein 1 homolog	GO:0005634;GO:0003690;GO:0006302;GO:0009553;GO:0009555;GO:0007131;GO:0010212	AT4G29170	3.16748467357177	0.00706170803150826
Cc02_g05860	GSCOC_T00039106001	A0A068UZH9	Putative Cation/H( ) antiporter 15	GO:0016021;GO:0015299		3.15650068894089	0.00619484203201436
Cc11_g09310	GSCOC_T00032753001	A0A068TZF1	Putative Phosphatidylserine synthase 2	GO:0016021;GO:0006659		3.15494387383219	8.47192017897808e-12
Cc06_g05110	GSCOC_T00043044001	A0A068V4A8	unknown protein; FUNCTIONS IN			3.14823207567558	0.0023723617421507
Cc06_g04680	GSCOC_T00042986001	A0A068V3S3	UDP-glycosyltransferase 73D1	GO:0008194	AT3G53150	3.14602452580718	0.00583196610813676
Cc02_g14040	GSCOC_T00029066001	A0A068TVV1	Hypothetical protein			3.14394289711311	1.19975399410154e-05
Cc11_g13240	GSCOC_T00032208001	A0A068TVK3	Putative unknown protein; BEST Arabidopsis thaliana protein match is			3.1428459158872	3.2526927455114e-06
Cc05_g13050	GSCOC_T00021110001	A0A068UCA3	Organic cation/carnitine transporter 4	GO:0016021;GO:0022857	AT3G20660	3.14146464305371	3.30653123774724e-10
Cc09_g07910	GSCOC_T00003777001	A0A068V9I5	Putative Monoglyceride lipase			3.13535505364614	1.10671151378441e-05
Cc01_g20660	GSCOC_T00015906001	A0A068U4L8	Putative Translocator protein homolog	GO:0016021	AT2G47770	3.1341139387317	1.50364908218389e-05
Cc03_g05070	GSCOC_T00026246001	A0A068TV52	Protein EIN4	GO:0005789;GO:0016021;GO:0005524;GO:0051740;GO:0038199;GO:0046872;GO:0000155	AT3G23150	3.1316924999305	1.39262118982551e-07
Cc03_g01630	GSCOC_T00025782001	A0A068TS98	Putative Protein of unknown function (DUF581)	GO:0000932	AT5G49120	3.12963660487317	8.56869800679044e-12
Cc02_g08330	GSCOC_T00029808001	A0A068TVQ8	Putative Zinc finger protein ZAT11		AT2G37430	3.12348269637947	0.00049417546016223
Cc06_g01110	GSCOC_T00023322001	A0A068UD22	Late embryogenesis abundant protein B19.3		AT3G51810	3.10818305002533	0.0030749518597585
Cc00_g35100	GSCOC_T00004229001	A0A068VN80	Ent-kaur-16-ene synthase, chloroplastic	GO:0010333	AT1G79460	3.10678563109466	0.0058553717963854
Cc10_g08450	GSCOC_T00034388001	A0A068TXE5	Putative uncharacterized protein			3.08844145586678	0.00494939811635707
Cc06_g16790	GSCOC_T00004130001	A0A068VD35	Vignain	GO:0008234	AT5G45890	3.0845910291372	5.0453822039514e-06
Cc02_g33790	GSCOC_T00013092001	A0A068VJ50	Probable linoleate 9S-lipoxygenase 5	GO:0046872;GO:0016702	AT1G55020	3.06877826825286	0.00576632013032651
Cc06_g02080	GSCOC_T00023448001	A0A068UE58	Putative Uncharacterized protein			3.04770561023457	1.43518028129707e-07
Cc01_g11900	GSCOC_T00028106001	A0A068UMV9	Probable serine/threonine-protein kinase RLCKVII	GO:0005524;GO:0004674	AT5G02800	3.04684399305825	4.46352369589178e-08
Cc08_g06080	GSCOC_T00024434001	A0A068UGD0	Putative unknown protein; LOCATED IN	GO:0016021		3.04314072603741	2.53990925839193e-05
Cc00_g27990	GSCOC_T00008908001	A0A068VLI3	Glucan endo-1,3-beta-glucosidase	GO:0004553;GO:0005975	AT4G34480	3.02779897752345	0.000423712365523713
Cc11_g09360	GSCOC_T00032744001	A0A068TZE8	Putative E3 ubiquitin-protein ligase RHA2A	GO:0016021	AT1G15100	3.02526553845627	4.97428468297771e-06
Cc10_g05650	GSCOC_T00034783001	A0A068TYA8	Zinc finger protein ZAT10		AT1G27730	3.02470151850691	2.24570954550758e-09
Cc01_g04050	GSCOC_T00040848001	A0A068V1H7	Putative G-type lectin S-receptor-like serine/threonine-protein kinase RLK1	GO:0016021;GO:0005524;GO:0004674	AT2G23950	3.02421719884673	0.00295020374759593
Cc03_g02240	GSCOC_T00025862001	A0A068TRG3	Hypothetical protein			3.01481584933464	0.00425378332803705
Cc02_g22640	GSCOC_T00014941001	A0A068TMI8	Putative DnaJ homolog subfamily B member 4	GO:0051082;GO:0006457	AT5G03160	3.00967139721599	0.00349544780080012
Cc11_g04420	GSCOC_T00004786001	A0A068V847	Hypothetical protein			3.00580916213985	1.22634391312966e-06
Cc09_g00710	GSCOC_T00017912001	A0A068U847	Auxin-responsive family protein	GO:0016021;GO:0046872;GO:0055114	AT4G17280	3.00443824614002	0.000432174480381733
Cc10_g14970	GSCOC_T00033656001	A0A068UUV3	Hypothetical protein	GO:0016021		3.00237222185413	1.66442195026734e-07
Cc09_g07440	GSCOC_T00036257001	A0A068UVZ5	Reticuline oxidase-like protein	GO:0071949;GO:0016491	AT4G20840	2.99572855493734	2.01151401089126e-15
Cc06_g01670	GSCOC_T00023397001	A0A068UDE0	Probable anion transporter 3, chloroplastic	GO:0016021;GO:0022857	AT2G38060	2.98644281018463	5.45637590199145e-10
Cc04_g09030	GSCOC_T00022780001	A0A068TRI6	Chaperone DnaJ-domain superfamily protein		AT2G35795	2.9841619081566	2.71915229794102e-11
Cc08_g14510	GSCOC_T00030213001	A0A068UQ90	Putative copper-transporting ATPase HMA5	GO:0016021;GO:0005524;GO:0019829;GO:0005507;GO:0030001	AT1G63440	2.97337949338512	7.16460744032293e-06
Cc02_g23250	GSCOC_T00015012001	A0A068TMZ9	Putative uncharacterized protein			2.96674388653717	9.2844376368576e-11
Cc11_g11230	GSCOC_T00032472001	A0A068TW65	Putative uncharacterized protein			2.96613362891059	0.00407612780739499
Cc07_g09440	GSCOC_T00037242001	A0A068U0G5	Cytochrome P450 90B1	GO:0016021;GO:0080132;GO:0020037;GO:0005506;GO:0004497;GO:0016705;GO:0016132;GO:0048366	AT3G50660	2.95316155325296	4.37472723859683e-08
Cc05_g06890	GSCOC_T00042205001	A0A068V2I2	Putative Clathrin light chain 1	GO:0030132;GO:0030130;GO:0016021;GO:0005198;GO:0006886;GO:0016192	AT2G20760	2.95027473662304	5.12897530232455e-05
Cc07_g05130	GSCOC_T00039776001	A0A068U468	Putative Protein of unknown function (DUF607)	GO:0005743;GO:0005262;GO:0015292;GO:0051560	AT2G23790	2.94273619452101	0.00933923775831022
Cc03_g01730	GSCOC_T00025795001	A0A068TSA8	NAD(P)-binding Rossmann-fold superfamily protein	GO:0016021	AT3G62830	2.94212077447038	0.000104033287080607
Cc07_g04270	GSCOC_T00039679001	A0A068U1Y8	Putative Ninja-family protein AFP3	GO:0007165	AT3G29575	2.93790798222663	4.80707883579205e-11
Cc02_g34220	GSCOC_T00000658001	A0A068V9L4	Hypoxia-responsive family protein	GO:0016021		2.93695906372548	2.06107760720901e-05
Cc03_g07460	GSCOC_T00026598001	A0A068TTP3	Cellulose synthase-like protein D1	GO:0016021;GO:0016760;GO:0071555;GO:0030244	AT2G33100	2.93473186320218	1.29877716876757e-07
Cc04_g00860	GSCOC_T00021712001	A0A068TN99	Sucrose synthase	GO:0016157;GO:0005985	AT3G43190	2.92863188952314	7.20729960596012e-05
Cc07_g04940	GSCOC_T00039755001	A0A068U2I1	Putative Endo-1,3(4)-beta-glucanase 1	GO:0052861		2.92648962939702	1.70517762407389e-13
Cc11_g10010	GSCOC_T00032640001	A0A068TZ58	Putative unknown protein; BEST Arabidopsis thaliana protein match is			2.92617884940388	2.74489515455192e-09
Cc03_g09500	GSCOC_T00030930001	A0A068UP21	Hypothetical protein			2.92454039407874	0.000572867581259051
Cc02_g05870	GSCOC_T00039107001	A0A068UZV3	Arogenate dehydrogenase 1, chloroplastic	GO:0008977;GO:0004665;GO:0006571	AT5G34930	2.9213928670961	7.33044285776187e-08
Cc06_g02670	GSCOC_T00023526001	A0A068UDQ2	Probable protein phosphatase 2C 4	GO:0004722	AT1G07630	2.91915429106634	2.11099102376138e-08
Cc11_g11930	GSCOC_T00032381001	A0A068TVZ8	Putative Ninja-family protein AFP2	GO:0007165	AT3G29575	2.91392828924675	3.32997152003132e-08
Cc02_g00910	GSCOC_T00019892001	A0A068U9L7	Small heat shock protein, chloroplastic		AT4G27670	2.91239144049561	1.63268567083174e-12
Cc06_g02300	GSCOC_T00023483001	A0A068UEF6	Protein of unknown function (DUF604)			2.89717560308536	3.94205811508739e-06
Cc03_g07470	GSCOC_T00026599001	A0A068TVQ6	Putative F-box protein At2g02240		AT2G02360	2.89606027856125	0.000170816946846477
Cc01_g10160	GSCOC_T00024097001	A0A068UEU0	Putative Ring/U-Box superfamily protein		AT5G19080	2.89459432674008	3.91215929286843e-07
Cc11_g12780	GSCOC_T00032271001	A0A068TVS9	Putative cAMP-regulated phosphoprotein 19-related protein			2.89177231110942	3.67732304627175e-12
Cc06_g05290	GSCOC_T00043072001	A0A068V477	Putative PHYTOSULFOKINE 3 PRECURSOR	GO:0005576;GO:0008083;GO:0008283	AT3G44735	2.89119071771706	1.17184284086621e-05
Cc09_g09980	GSCOC_T00041104001	A0A068V1B2	Bidirectional sugar transporter SWEET2a	GO:0016021;GO:0005886;GO:0008643	AT3G14770	2.88919399256926	6.2484683636067e-05
Cc03_g07810	GSCOC_T00026645001	A0A068TTS8	Putative uncharacterized protein	GO:0016021	AT5G16720	2.88247022814064	0.00243692796560207
Cc07_g13880	GSCOC_T00036684001	A0A068TZ98	Probable 1-deoxy-D-xylulose-5-phosphate synthase 2, chloroplastic	GO:0008661;GO:0016114	AT4G15560	2.87982844850619	5.76411386440457e-05
Cc11_g09350	GSCOC_T00032746001	A0A068TXT6	Putative uncharacterized protein	GO:0005634;GO:0005524;GO:0046872;GO:0004652;GO:0003723;GO:0006397;GO:0031123;GO:0043631	AT1G17980	2.87918483343163	5.08470121642908e-07
Cc04_g02140	GSCOC_T00021882001	A0A068TRD7	NADH dehydrogenase [ubiquinone] iron-sulfur protein 7, mitochondrial	GO:0051539;GO:0046872;GO:0008137;GO:0048038	AT5G11770	2.87755295257436	0.000922517567655268
Cc03_g09490	GSCOC_T00030927001	A0A068UPV1	Hypothetical protein			2.8745696902898	2.49762361927265e-05
Cc06_g10380	GSCOC_T00041787001	A0A068U402	Hypothetical protein	GO:0016021		2.86957703018122	0.00613026623605955
Cc02_g09550	GSCOC_T00029643001	A0A068TV40	Duplicated homeodomain-like superfamily protein	GO:0005634;GO:0003677	AT5G08520	2.86447514077784	3.68994090834755e-07
Cc03_g00580	GSCOC_T00025641001	A0A068TS28	poly(A) polymerase 3	GO:0005737;GO:0016021;GO:0005634;GO:0005524;GO:0046872;GO:0004652;GO:0003723;GO:0006397;GO:0031123;GO:0043631	AT3G06560	2.86274732421026	0.000559456578959963
Cc00_g30840	GSCOC_T00006253001	A0A068VPV9	Putative NAC domain-containing protein 29	GO:0005634;GO:0003677;GO:0006355	AT5G64530	2.85684526486467	4.13208968607345e-05
Cc00_g17550	GSCOC_T00012275001	A0A068VIB0	Peroxidase 3	GO:0005576;GO:0020037;GO:0046872;GO:0004601;GO:0042744;GO:0006979	AT1G05260	2.85543987758395	2.39044876048864e-09
Cc08_g12330	GSCOC_T00030498001	A0A068UNE8	Putative Metalloendoproteinase 1	GO:0031012;GO:0004222;GO:0008270	AT2G45040	2.84984467670702	0.00252840898009041
Cc02_g18810	GSCOC_T00014436001	A0A068TMJ4	Abscisic acid 8'-hydroxylase 4	GO:0016021;GO:0020037;GO:0005506;GO:0004497;GO:0016705	AT3G19270	2.84723616782035	1.0382130059555e-06
Cc02_g01010	GSCOC_T00019909001	A0A068U9M6	Putative Homeobox-leucine zipper protein ATHB-7	GO:0005634;GO:0043565;GO:0006355	AT2G46680	2.84486216497525	2.47085197115692e-13
Cc05_g12340	GSCOC_T00021202001	A0A068UBF5	Putative Stem-specific protein TSJT1			2.83922079906784	1.80594942789959e-09
Cc06_g08070	GSCOC_T00031178001	A0A068UQA6	Probable galactinol--sucrose galactosyltransferase 6	GO:0009507;GO:0009506;GO:0003824;GO:0003729;GO:0009409;GO:0080167;GO:0006979	AT3G57520	2.83812362299585	3.0738865736116e-10
Cc08_g09460	GSCOC_T00026886001	A0A068UHX4	Exosome complex CDSuclease RRP46 homolog	GO:0004536;GO:0003690;GO:0042802;GO:0004540;GO:0003727	AT3G46210	2.83326425387029	1.21663909432622e-07
Cc11_g17430	GSCOC_T00038314001	A0A068UYK2	Pyruvate dehydrogenase E1 component subunit beta, mitochondrial	GO:0005739;GO:0005730;GO:0005774;GO:0004739;GO:0006086;GO:0042742	AT5G50850	2.8328350043282	1.77107479035212e-08
Cc02_g03180	GSCOC_T00020190001	A0A068UAN0	Putative uncharacterized protein			2.81426832021299	0.00191926975627223
Cc11_g10260	GSCOC_T00032600001	A0A068TZ34	Glycolipid transfer protein (GLTP) family protein	GO:0005737;GO:0005634;GO:0120013	AT4G39670	2.80113507463044	2.68315539474071e-06
Cc11_g10830	GSCOC_T00032525001	A0A068TWB1	ABC transporter G family member 21	GO:0016021;GO:0005524;GO:0016887	AT3G25620	2.79553906177167	0.000121678726127362
Cc06_g02650	GSCOC_T00023524001	A0A068UEJ4	Metallothionein-like protein 1	GO:0046872		2.79343909293492	5.66554008615361e-06
Cc11_g12740	GSCOC_T00032276001	A0A068TVP6	NAC domain-containing protein 29	GO:0005634;GO:0003677;GO:0009793;GO:0009908;GO:0009835;GO:0010150;GO:0009825;GO:0006355	AT1G69490	2.79055078580165	4.40037881050405e-09
Cc04_g10080	GSCOC_T00042543001	A0A068V2I3	Malate synthase, glyoxysomal	GO:0004474;GO:0006097;GO:0006099	AT5G03860	2.78987419564421	1.39271165047616e-12
Cc02_g15600	GSCOC_T00014014001	A0A068TKX7	Putative unknown protein; FUNCTIONS IN	GO:0006995;GO:0006970	AT1G29290	2.7877170171398	0.000650428766463084
Cc02_g35310	GSCOC_T00042866001	A0A068V3M5	Plant neutral invertase family protein	GO:0033926;GO:0004575;GO:0005987	AT1G56560	2.7863675415768	4.26421198329128e-14
Cc10_g07300	GSCOC_T00034540001	A0A068TXQ7	Annexin D1	GO:0005509;GO:0005544;GO:0004377	AT1G35720	2.77802882206374	1.59465617220148e-08
Cc07_g12210	GSCOC_T00036908001	A0A068U2D2	RNA-binding (RRM/RBD/RNP motifs) family protein	GO:0003729	AT3G54770	2.76538267357815	8.10649232209741e-10
Cc05_g02920	GSCOC_T00033458001	A0A068USA6	1-aminocyclopropane-1-carboxylate oxidase 4		AT1G05010	2.75861672629287	0.000174504013638545
Cc05_g05740	GSCOC_T00035151001	A0A068UTW6	Predicted protein	GO:0005634;GO:0003677	AT3G23250	2.75668492307831	4.39398469115182e-05
Cc04_g03100	GSCOC_T00021999001	A0A068TQ27	Putative Dynein light chain LC6, flagellar outer arm	GO:0005737;GO:0030286;GO:0005874;GO:0003774;GO:0007017		2.75137925507034	2.04467912244273e-07
Cc10_g02590	GSCOC_T00024764001	A0A068UGZ6	Glucose-1-phosphate adenylyltransferase large subunit, chloroplastic/amyloplastic	GO:0009507;GO:0005524;GO:0008878;GO:0005978;GO:0019252	AT1G27680	2.73345642374044	4.12894856833318e-10
Cc07_g12900	GSCOC_T00036817001	A0A068U0N0	Glutamate decarboxylase	GO:0004351;GO:0030170;GO:0006536	AT5G17330	2.72739809624598	4.82929889593507e-05
Cc03_g03480	GSCOC_T00026038001	A0A068TSU4	Putative Probable membrane-associated kinase regulator 1	GO:0005886;GO:0019210		2.72588991556045	6.46294858947139e-15
Cc10_g13270	GSCOC_T00035319001	A0A068UUN0	2-oxoisovalerate dehydrogenase subunit alpha, mitochondrial	GO:0016624	AT1G21400	2.72045643384298	3.1745349610353e-08
Cc11_g15860	GSCOC_T00038112001	A0A068UXK3	Probable protein phosphatase 2C 14	GO:0046872;GO:0004722		2.71742292247649	0.00642707465800304
Cc04_g14500	GSCOC_T00040692001	A0A068V398	Ribulose bisphosphate carboxylase/oxygenase activase 1, chloroplastic	GO:0005524	AT2G39730	2.71069268059701	0.000145558980398534
Cc10_g05130	GSCOC_T00034851001	A0A068U0Y6	Putative Uncharacterised conserved protein UCP031279			2.71021147052212	3.07566564002355e-08
Cc00_g17930	GSCOC_T00008101001	A0A068VHS7	Putative unknown protein; Has 35333 Blast hits to 34131 proteins in 2444 species	GO:0016021		2.70985013483345	5.49729575467388e-11
Cc11_g04980	GSCOC_T00020426001	A0A068UA23	Putative uncharacterized protein	GO:0005634;GO:0003677		2.70635563468564	0.00966769099944655
Cc02_g34760	GSCOC_T00011783001	A0A068VCH2	Polynucleotidyl transferase, ribonuclease H-like superfamily protein	GO:0008408;GO:0003676;GO:0010587;GO:0030422		2.70354298341916	9.75098326847544e-07
Cc04_g12540	GSCOC_T00005318001	A0A068V8G8	Cell division cycle protein 48 homolog	GO:0005524;GO:0016787	AT5G03340	2.6998878185485	6.01028829958705e-08
Cc06_g08420	GSCOC_T00031134001	A0A068UQ75	Phospholipase D alpha 1	GO:0016020;GO:0005509;GO:0070290;GO:0004630;GO:0016042;GO:0046470	AT3G15730	2.69766321628236	6.48636955070101e-11
Cc08_g13770	GSCOC_T00030306001	A0A068UNF3	non-yellowing 1		AT4G22920	2.68527970655267	1.36424469309869e-06
Cc06_g11590	GSCOC_T00041639001	A0A068U4S1	calmodulin-binding family protein		AT5G57010	2.68304392942382	0.000521010973788055
Cc07_g13370	GSCOC_T00036751001	A0A068U016	Putative myb domain protein 43	GO:0005634;GO:0003677	AT1G66230	2.67932927991289	0.000515000915445734
Cc02_g09160	GSCOC_T00029693001	A0A068TUM5	Putative Trans-2,3-enoyl-CoA reductase	GO:0016021;GO:0016627;GO:0006629		2.67478339789354	6.05945458509175e-08
Cc04_g00640	GSCOC_T00021686001	A0A068TQZ8	Putative RING-H2 finger protein ATL3	GO:0016021	AT1G72310	2.67218944876548	0.000261520068470934
Cc10_g04430	GSCOC_T00034935001	A0A068U146	Putative Patatin group A-3	GO:0016787;GO:0016042	AT2G26560	2.6672303007026	5.62495848393513e-09
Cc01_g13370	GSCOC_T00028302001	A0A068UKP3	Putative Protein of unknown function (DUF604)	GO:0016021		2.66711013561894	7.44658418494575e-06
Cc01_g08690	GSCOC_T00023901001	A0A068UF94	Momilactone A synthase		AT1G52340	2.6440926078505	6.24602698509887e-05
Cc02_g14480	GSCOC_T00013859001	A0A068TLF5	unknown protein; FUNCTIONS IN	GO:0016021		2.63427703465205	0.000269658010725328
Cc04_g05060	GSCOC_T00022250001	A0A068TPK8	CBL-interacting serine/threonine-protein kinase 5	GO:0005524;GO:0004674;GO:0007165	AT5G10930	2.63119055271997	1.4726543248456e-08
Cc03_g02250	GSCOC_T00025863001	A0A068TRN1	Putative RING finger and CHY zinc finger domain-containing protein 1	GO:0008270	AT5G18650	2.63098938660032	7.45946976301648e-08
Cc06_g13410	GSCOC_T00041401001	A0A068U3Q5	Xyloglucan endotransglucosylase/hydrolase protein 22	GO:0048046;GO:0005618;GO:0004553;GO:0016762;GO:0042546;GO:0071555;GO:0010411	AT5G57560	2.62693390469559	1.97900212545958e-08
Cc02_g35840	GSCOC_T00042783001	A0A068V5R6	Putative Isopenicillin N epimerase	GO:0003824	AT5G26600	2.61348892671044	6.22847221177817e-11
Cc07_g07300	GSCOC_T00040072001	A0A068U260	ACT domain repeat 1		AT5G65890	2.61237593420728	4.3141421526216e-11
Cc03_g10990	GSCOC_T00042047001	A0A068V272	Cytochrome P450 71A2	GO:0020037;GO:0005506;GO:0004497;GO:0016705	AT3G48310	2.61170410655825	0.000770448257418587
Cc01_g10320	GSCOC_T00024120001	A0A068UFG7	Putative RING finger and CHY zinc finger domain-containing protein 1	GO:0008270;GO:1902456	AT5G22920	2.60668868973761	3.62807982824452e-06
Cc09_g06810	GSCOC_T00005139001	A0A068VA99	Fe(2 ) transport protein 2	GO:0016021;GO:0005385	AT2G04032	2.60043330208531	7.81206472481021e-06
Cc06_g08370	GSCOC_T00031139001	A0A068UQ79	EIN3-binding F-box protein 1		AT2G25490	2.59298466233263	1.98808127111737e-06
Cc03_g01720	GSCOC_T00025794001	A0A068TU26	UDP-glucuronic acid decarboxylase 1		AT3G62830	2.59274025954646	3.48651648337846e-06
Cc06_g12400	GSCOC_T00041541001	A0A068U621	inter-alpha-trypsin inhibitor heavy chain-related			2.58962704784819	7.89907065254661e-05
Cc01_g21270	GSCOC_T00004999001	A0A068V8W0	alpha/beta-Hydrolases superfamily protein	GO:0008970;GO:0006629	AT1G02660	2.58785149091938	1.82899662981971e-06
Cc06_g02640	GSCOC_T00023523001	A0A068UG56	Putative Kinesin-like protein KIF22	GO:0009507;GO:0005874;GO:0005524;GO:0008017;GO:0003777;GO:0007018	AT5G02370	2.5706549907055	0.00312369709611868
Cc07_g11910	GSCOC_T00036942001	A0A068U2F4	Putative uncharacterized protein	GO:0032300;GO:0005524;GO:0016887;GO:0030983;GO:0006298	AT4G35520	2.56826837578785	0.00209646769612616
Cc10_g08540	GSCOC_T00034375001	A0A068TXX1	Cox19-like CHCH family protein			2.55850801356248	0.000146828940768822
Cc11_g09060	GSCOC_T00032793001	A0A068TZG5	RING/FYVE/PHD zinc finger superfamily protein	GO:0016021;GO:0008270		2.55528459487836	5.03592266113402e-08
Cc10_g01200	GSCOC_T00024587001	A0A068UFL6	Probable nucleoredoxin 2		AT4G31240	2.55356534127589	9.33609808042998e-16
Cc01_g16570	GSCOC_T00016426001	A0A068U6U9	Putative Chaperone protein dnaJ 20, chloroplastic		AT4G13830	2.54868740567727	1.10251852399182e-06
Cc08_g11200	GSCOC_T00027115001	A0A068UJC1	Serine/threonine-protein kinase SAPK3	GO:0005524;GO:0004674	AT4G33950	2.54845624626089	1.3000977973038e-07
Cc06_g12690	GSCOC_T00041505001	A0A068U4F1	ATP binding microtubule motor family protein	GO:0005874;GO:0009506;GO:0005524;GO:0008017;GO:0003777;GO:0000911;GO:0009558;GO:0007112;GO:0007018;GO:0009555;GO:0010245	AT3G43210	2.54155706256703	0.00850244258726784
Cc11_g00230	GSCOC_T00019448001	A0A068V7W5	Putative Transducin/WD40 repeat-like superfamily protein			2.53980912301133	0.000209747228007139
Cc04_g11330	GSCOC_T00037304001	A0A068UW23	Putative protein kinase family protein / peptidoglycan-binding LysM domain-containing protein	GO:0016021;GO:0005524;GO:0004672		2.53901972019711	0.00838398123924855
Cc11_g14210	GSCOC_T00032088001	A0A068TY11	UDP-glycosyltransferase 74B1	GO:0008194	AT1G24100	2.53896544441878	7.67989515598013e-06
Cc10_g00730	GSCOC_T00024531001	A0A068UI53	unknown protein; BEST Arabidopsis thaliana protein match is	GO:0009570;GO:0043036;GO:2001070;GO:2000904		2.53736125964875	2.25602706888868e-12
Cc06_g03110	GSCOC_T00023583001	A0A068UDM6	Plant protein 1589 of unknown function			2.52489764743092	9.88304587204331e-06
Cc11_g05120	GSCOC_T00020452001	A0A068UB32	G-type lectin S-receptor-like serine/threonine-protein kinase At4g27290	GO:0016021;GO:0005524;GO:0004672;GO:0048544	AT4G27290	2.52353448472617	1.72123450230302e-06
Cc01_g19020	GSCOC_T00016112001	A0A068U6A9	Heat stress transcription factor A-6b	GO:0042025;GO:0005634;GO:0003700;GO:0043565	AT3G22830	2.5229961131972	0.000153732075760535
Cc03_g03180	GSCOC_T00025997001	A0A068TSQ7	Putative Basic 7S globulin	GO:0004190		2.52057763367831	0.00270151638047299
Cc06_g01870	GSCOC_T00023424001	A0A068UDG2	PAR1 protein			2.51973752924576	2.40521125542571e-06
Cc11_g11400	GSCOC_T00032449001	A0A068TX23	Putative Sodium-coupled neutral amino acid transporter 2	GO:0016021	AT3G30390	2.51800860996194	0.000113089190398665
Cc00_g15960	GSCOC_T00007992001	A0A068VH85	Isoflavone reductase homolog		AT4G39230	2.5023251985909	5.76137470707093e-13
Cc02_g06790	GSCOC_T00039229001	A0A068V2C5	Nematode resistance protein-like HSPRO2	GO:0020037;GO:0046872;GO:0006952;GO:0019441	AT2G40000	2.502261575323	3.63335468018345e-05
Cc07_g03570	GSCOC_T00039597001	A0A068U1T7	NAC domain-containing protein 100	GO:0005634;GO:0003677;GO:0006355	AT5G61430	2.50150608630984	6.16615118450538e-12
Cc06_g08410	GSCOC_T00031135001	A0A068UPE9	Putative uncharacterized protein	GO:0016021		2.49910593836936	4.41697783151425e-07
Cc10_g07470	GSCOC_T00034517001	A0A068TYM7	Putative Uncharacterized WD repeat-containing protein alr3466	GO:0016021		2.49723464103898	4.34247777971632e-08
Cc07_g11230	GSCOC_T00037025001	A0A068U022	Putative Aspartic proteinase-like protein 1	GO:0004190	AT2G17760	2.48920628152188	2.44102031381628e-10
Cc01_g19140	GSCOC_T00016098001	A0A068U5V1	Putative serine/threonine-protein kinase/receptor R826	GO:0005524;GO:0004672	AT2G24360	2.48565215858747	1.00814506943953e-07
Cc02_g10830	GSCOC_T00029486001	A0A068TV06	Hypothetical protein			2.48376660353159	2.04919489456026e-08
Cc04_g14140	GSCOC_T00035943001	A0A068UVG7	Putative Serine/threonine-protein kinase ATM	GO:0004674;GO:0006974;GO:2001020;GO:0008380		2.47932841409902	0.000502882598248825
Cc05_g12740	GSCOC_T00021151001	A0A068UBC1	Dynein light chain LC6, flagellar outer arm	GO:0005737;GO:0030286;GO:0016021;GO:0005874;GO:0003774;GO:0007017		2.47053291281607	8.15088929290717e-05
Cc05_g11900	GSCOC_T00021256001	A0A068UCK2	Putative Early nodulin-like protein 2	GO:0046658;GO:0048046;GO:0009507;GO:0005773;GO:0009055	AT4G27520	2.46874222924842	1.13999667563274e-10
Cc05_g10650	GSCOC_T00021413001	A0A068UCZ1	Bidirectional sugar transporter SWEET2	GO:0016021;GO:0008643	AT3G14770	2.46415957008666	3.6348879664016e-06
Cc03_g16160	GSCOC_T00002114001	A0A068VET4	Putative Glucose-1-phosphate adenylyltransferase small subunit, chloroplastic/amyloplastic	GO:0016779;GO:0009058	AT1G05610	2.45845736929417	0.0054338385767144
Cc01_g16880	GSCOC_T00016390001	A0A068U8F0	Small ubiquitin-related modifier 1	GO:0005634	AT4G26840	2.45638182965033	9.76623797215524e-06
Cc06_g12500	GSCOC_T00041530001	A0A068U610	Putative Protein TIFY 10A		AT1G19180	2.45627982180502	8.03332379506072e-12
Cc06_g04430	GSCOC_T00042952001	A0A068V3Q7	Major facilitator superfamily protein	GO:0016021		2.45606840691653	2.6328202678803e-06
Cc02_g21010	GSCOC_T00014732001	A0A068TMZ2	Peptidyl-prolyl cis-trans isomerase FKBP12	GO:0005829;GO:0003755	AT5G64350	2.45385446851108	2.39502970911644e-07
Cc07_g13250	GSCOC_T00036766001	A0A068U0F7	Eukaryotic aspartyl protease family protein	GO:0004190		2.45104941971012	2.07605941826735e-12
Cc07_g09480	GSCOC_T00037236001	A0A068U0I5	Hypothetical protein			2.44859127564804	0.000421887627758078
Cc04_g08180	GSCOC_T00022670001	A0A068TR80	Probable phosphatidylinositol 4-kinase type 2-beta At1g26270		AT2G03890	2.44715456564833	0.00226232916061389
Cc06_g11710	GSCOC_T00041624001	A0A068U4A2	unknown protein; BEST Arabidopsis thaliana protein match is			2.44353348633978	1.41406398215215e-05
Cc05_g13670	GSCOC_T00021032001	A0A068UBX8	Putative NEP1-interacting protein 1		AT2G17450	2.44081201870848	3.61803615256555e-06
Cc05_g07590	GSCOC_T00016753001	A0A068V7H9	Ethylene-responsive transcription factor 4	GO:0005634;GO:0003677;GO:0003700	AT5G44210	2.43709660367391	3.56224966604911e-05
Cc04_g08890	GSCOC_T00022765001	A0A068TTD5	DNA-directed RNA polymerase III subunit RPC2	GO:0003677;GO:0003899;GO:0032549;GO:0006351	AT5G45140	2.43163895830021	0.00170165521235567
Cc07_g00290	GSCOC_T00019095001	A0A068V7J4	Hypothetical protein			2.42811000033001	0.000276086595709862
Cc05_g01440	GSCOC_T00018223001	A0A068V752	4-hydroxyphenylpyruvate dioxygenase	GO:0003868;GO:0009072		2.42571636652269	1.73694918893836e-09
Cc11_g11030	GSCOC_T00032492001	A0A068TW85	Putative uncharacterized protein		AT2G04240	2.41986271853383	0.00191926975627223
Cc00_g34520	GSCOC_T00012632001	A0A068VMZ4	Benzyl alcohol O-benzoyltransferase	GO:0016747	AT3G03480	2.4078585257155	0.000260496346566682
Cc10_g01830	GSCOC_T00024672001	A0A068UIF5	Cytokinin riboside 5'-monophosphate phosphoribohydrolase LOG1	GO:0016787;GO:0009691	AT2G28305	2.39734896249718	4.88083566828526e-06
Cc09_g08710	GSCOC_T00020848001	A0A068UDF5	Putative Uncharacterized membrane protein C24H6.13	GO:0009941;GO:0016021;GO:0005886;GO:0009506;GO:0005774	AT1G30360	2.39598248145379	2.47444994171169e-09
Cc08_g10810	GSCOC_T00027060001	A0A068UIC4	Heat shock factor protein HSF30	GO:0042025;GO:0005634;GO:0003700;GO:0043565	AT2G26150	2.39490995834742	0.000468011440352053
Cc03_g09460	GSCOC_T00030923001	A0A068UPB9	Hypothetical protein			2.39016386524727	7.4327984112686e-05
Cc04_g08690	GSCOC_T00022742001	A0A068TTB4	Putative Receptor-like serine/threonine-protein kinase SD1-7	GO:0005524;GO:0004672		2.37304512095134	0.00322833719342959
Cc04_g08900	GSCOC_T00022766001	A0A068TRP1	DNA-directed RNA polymerase III subunit rpc2	GO:0003677;GO:0003899;GO:0032549;GO:0006351	AT5G45140	2.37031415481796	0.000431062936515249
Cc01_g07650	GSCOC_T00015432001	A0A068V4F9	Hypothetical protein			2.36838276163191	0.00154539891661687
Cc05_g11710	GSCOC_T00021280001	A0A068UE92	Probable aminotransferase TAT2	GO:0030170;GO:0008483;GO:0009058;GO:0006520	AT5G53970	2.36210291672379	1.04958057213358e-08
Cc06_g11570	GSCOC_T00041642001	A0A068U3R6	Heat shock factor	GO:0042025;GO:0005634;GO:0003700;GO:0043565	AT2G26150	2.35622042782793	0.000578583217680757
Cc08_g13180	GSCOC_T00030372001	A0A068UN59	UDP-glucuronate 4-epimerase 3	GO:0005768;GO:0016021;GO:0005802	AT4G00110	2.34675556286448	1.28762885680833e-07
Cc10_g06500	GSCOC_T00034647001	A0A068TXZ2	Purine permease 3	GO:0016021;GO:0015211	AT1G28220	2.33989847769978	4.80279992026446e-08
Cc05_g09870	GSCOC_T00021529001	A0A068UD05	Probable amino acid permease 7	GO:0016021	AT5G23810	2.33537789649458	2.61989641696956e-11
Cc07_g09620	GSCOC_T00037218001	A0A068U100	Putative Late embryogenesis abundant (LEA) protein			2.33369919194538	0.000986107183468071
Cc07_g12020	GSCOC_T00036930001	A0A068U0F1	Auxin efflux carrier family protein	GO:0016021;GO:0055085	AT2G17500	2.33056057521643	5.47443982983828e-05
Cc01_g03180	GSCOC_T00033153001	A0A068UU15	Putative NB-ARC domain-containing disease resistance protein	GO:0043531	AT1G12970	2.32656818553542	0.00193281849313306
Cc01_g17720	GSCOC_T00016290001	A0A068U6K1	Tyrosine decarboxylase 1	GO:0036469;GO:0030170;GO:0006587	AT2G20340	2.32488989289609	0.000181427910713309
Cc00_g13780	GSCOC_T00013301001	A0A068VGG8	Alpha-aminoadipic semialdehyde synthase	GO:0016021		2.3233476937298	1.75463907487374e-07
Cc06_g06500	GSCOC_T00031374001	A0A068UQ97	Putative uncharacterized protein			2.31863172547963	0.000136916207642391
Cc10_g06630	GSCOC_T00034630001	A0A068U0I3	Hypothetical protein			2.31493805208089	0.000209350869111959
Cc02_g11040	GSCOC_T00029463001	A0A068TWQ1	Transmembrane amino acid transporter family protein	GO:0016021	AT2G39130	2.30983483323851	0.00215030317811012
Cc02_g10840	GSCOC_T00029485001	A0A068TWR5	unknown protein; BEST Arabidopsis thaliana protein match is			2.30854325187262	2.76261899413817e-06
Cc07_g17550	GSCOC_T00008838001	A0A068VGF2	Putative endonuclease or glycosyl hydrolase	GO:0005777;GO:0010468		2.30771960831928	0.0011658023579417
Cc07_g18900	GSCOC_T00018674001	A0A068U8M7	DNA polymerase delta catalytic subunit	GO:0005634;GO:0051539;GO:0003677;GO:0003887;GO:0046872;GO:0000166;GO:0006260		2.30605072334794	0.000450688566151307
Cc05_g13480	GSCOC_T00021057001	A0A068UBD8	Putative Septum-promoting GTP-binding protein 1	GO:0005525;GO:0003924		2.29324963579861	1.33851576106134e-08
Cc03_g08920	GSCOC_T00042747001	A0A068V2Y7	Hypothetical protein	GO:0016021		2.29248787807297	1.53379886875455e-06
Cc01_g14420	GSCOC_T00028440001	A0A068UL30	Asparagine synthetase [glutamine-hydrolyzing]	GO:0004066;GO:0005524;GO:0006529;GO:0043617;GO:0006541;GO:0009750;GO:0009749;GO:0009744	AT3G47340	2.27942926866654	1.48867926625282e-07
Cc04_g05290	GSCOC_T00022277001	A0A068TSD7	Putative uncharacterized protein			2.27942297411126	8.07130052870251e-06
Cc06_g06450	GSCOC_T00031381001	A0A068UQA2	Putative NDR1/HIN1-like 2	GO:0016021	AT5G06320	2.27894601340051	1.96708915688713e-05
Cc00_g23580	GSCOC_T00010323001	A0A068VK80	Isoflavone reductase homolog A622		AT4G39230	2.27499534319046	1.97693652636411e-08
Cc02_g23650	GSCOC_T00015067001	A0A068TN60	Putative F-box protein At3g07870			2.26844093522084	1.82635559963206e-08
Cc06_g02040	GSCOC_T00023444001	A0A068UFZ4	Probable glutathione S-transferase		AT3G09270	2.26618819341115	9.19834526603938e-05
Cc08_g07970	GSCOC_T00007309001	A0A068VEG0	Hypothetical protein			2.25483514334758	0.00228898124599247
Cc10_g15730	GSCOC_T00033766001	A0A068UTA5	Putative Probable mitochondrial 2-oxoglutarate/malate carrier protein	GO:0016021;GO:0005310;GO:0006839	AT4G24570	2.25448570558686	0.00688338172161383
Cc02_g18280	GSCOC_T00014367001	A0A068TMF3	unknown protein; FUNCTIONS IN			2.25264739862192	1.21448704151248e-05
Cc10_g07620	GSCOC_T00034499001	A0A068TYL3	Putative pre-mRNA-processing protein 40A	GO:0045292		2.24693975112249	0.00541465038226533
Cc06_g07430	GSCOC_T00031261001	A0A068USA7	Putative unknown protein; Has 1807 Blast hits to 1807 proteins in 277 species			2.2423380203326	0.000153874110850959
Cc09_g04370	GSCOC_T00017434001	A0A068U6K3	Putative RING/U-box superfamily protein		AT4G11360	2.24191558416059	0.00461796284398748
Cc05_g09440	GSCOC_T00021585001	A0A068UCD7	Mitogen-activated protein kinase 10	GO:0005524;GO:0004707	AT2G42880	2.23977526402984	9.56808978708388e-09
Cc07_g08780	GSCOC_T00040267001	A0A068U587	Putative Probable mannose-6-phosphate isomerase	GO:0004476;GO:0008270;GO:0005975;GO:0009298	AT3G02570	2.23695472601579	1.68020725010155e-06
Cc03_g09660	GSCOC_T00030952001	A0A068UPD4	Ras-related protein RABA5c	GO:0005525;GO:0003924	AT2G43130	2.23639524915664	2.13047582644685e-06
Cc04_g04520	GSCOC_T00022177001	A0A068TPM2	BED zinc finger ;hAT family dimerisation domain	GO:0003677;GO:0046983	AT3G42170	2.23533478780173	1.21210264659414e-07
Cc06_g02030	GSCOC_T00023443001	A0A068UE52	Glutathione S-transferase U8		AT3G09270	2.23215858806972	0.000178522635151695
Cc07_g16690	GSCOC_T00037530001	A0A068UWQ3	Hypothetical protein	GO:0016021		2.23122077373832	0.00564151682913326
Cc03_g09400	GSCOC_T00042674001	A0A068V3G3	Selenium-binding protein 1	GO:0008430	AT4G14030	2.22960843033622	6.05449965290937e-09
Cc05_g01770	GSCOC_T00015755001	A0A068V4Q8	Eukaryotic aspartyl protease family protein	GO:0004190	AT3G18490	2.22780181856828	0.0015251077913647
Cc09_g04300	GSCOC_T00017443001	A0A068U946	NADP-dependent alkenal double bond reductase P2	GO:0016491	AT5G16990	2.22659043101804	0.00384559345596933
Cc02_g38900	GSCOC_T00027793001	A0A068UKJ7	Hypothetical protein	GO:0016021		2.22371409399844	0.00293084842332484
Cc08_g09670	GSCOC_T00026913001	A0A068UI78	Putative Mitogen-activated protein kinase kinase kinase 1	GO:0061630;GO:0008270		2.22137820744592	0.000779837258785306
Cc04_g03730	GSCOC_T00022071001	A0A068TPZ3	Pleiotropic drug resistance protein 1	GO:0016021;GO:0005524;GO:0016887	AT1G15520	2.21739782235634	0.00062320699674312
Cc05_g03140	GSCOC_T00033506001	A0A068UUM6	Nitrate transporter 1.3	GO:0016021;GO:0022857	AT3G21670	2.21738641776176	0.00028589531931715
Cc00_g13050	GSCOC_T00010498001	A0A068VGY0	Glutamate dehydrogenase A	GO:0000166;GO:0016639;GO:0006520	AT5G07440	2.21447030773781	1.16238042293667e-07
Cc05_g14210	GSCOC_T00038849001	A0A068UZ37	Putative Glucan endo-1,3-beta-glucosidase 13	GO:0004553;GO:0005975	AT5G56590	2.21395642645947	3.62641215256564e-05
Cc09_g03050	GSCOC_T00017596001	A0A068U9J2	Putative Exosome complex component CSL4	GO:0000178;GO:0003723;GO:0006396		2.21040890913427	5.50411494360827e-06
Cc08_g04270	GSCOC_T00034246001	A0A068UTB4	Hypothetical protein			2.21040430242323	0.000709181106119498
Cc10_g14280	GSCOC_T00012018001	A0A068VCM4	Protein of unknown function (DUF300)	GO:0016021	AT1G77220	2.20604483445913	2.29472642909544e-07
Cc11_g00330	GSCOC_T00019466001	A0A068V7X5	Alpha-galactosidase	GO:0052692;GO:0005975	AT5G08380	2.2011001911908	0.00347753279743575
Cc03_g04350	GSCOC_T00026147001	A0A068TS89	Meiotic recombination protein DMC1 homolog	GO:0005634;GO:0005524;GO:0003677;GO:0008094;GO:0000150;GO:0006281;GO:0007131	AT3G22880	2.19807987495276	0.00178389152070513
Cc10_g00540	GSCOC_T00024508001	A0A068UGG6	Probable serine/threonine-protein kinase Cx32, chloroplastic	GO:0005524;GO:0004674	AT2G17220	2.19800165918727	2.93347975256981e-05
Cc11_g16360	GSCOC_T00038174001	A0A068UXN7	Heat shock protein, putative		AT4G27670	2.19482525646477	0.00277648022999651
Cc10_g00740	GSCOC_T00024532001	A0A068UGI2	unknown protein; INVOLVED IN			2.19312054933547	2.58729999141073e-05
Cc06_g11140	GSCOC_T00041693001	A0A068U4Y8	Putative Graves disease carrier protein	GO:0016021;GO:0005743;GO:0005347;GO:0015228;GO:1990559	AT4G26180	2.19124878242523	3.83822905391684e-06
Cc06_g20150	GSCOC_T00022923001	A0A068UDH5	Calmodulin-interacting protein 111	GO:0009535;GO:0005524;GO:0005516	AT3G56690	2.18451490642472	0.00395880874374823
Cc00_g08270	GSCOC_T00003341001	A0A068VHW2	Isoflavone reductase homolog A622		AT1G75280	2.17758138978514	7.56682520756507e-07
Cc02_g04570	GSCOC_T00020374001	A0A068UCJ3	Hexose carrier protein HEX6	GO:0016021;GO:0022857	AT5G61520	2.17467674726525	0.000176657906845272
Cc03_g02380	GSCOC_T00025880001	A0A068TSG3	Inactive beta-amylase 9	GO:0102229;GO:0016161;GO:0000272	AT5G18670	2.17166738077794	2.44238074971142e-09
Cc01_g10440	GSCOC_T00024140001	A0A068UFS2	Serine carboxypeptidase-like 48	GO:0004185	AT3G45010	2.16752763829432	0.0017997833684567
Cc01_g07640	GSCOC_T00015431001	A0A068V435	Transcription factor LHW	GO:0005634;GO:0003700;GO:0046983;GO:0010078;GO:0045893;GO:0010479;GO:0010089	AT2G27230	2.16302569439028	5.14825405439384e-05
Cc10_g00770	GSCOC_T00024536001	A0A068UGA5	Probable serine/threonine-protein kinase At4g35230	GO:0005524;GO:0004672	AT4G35230	2.1593718043505	8.66157920555336e-09
Cc11_g09540	GSCOC_T00032705001	A0A068TWP0	Putative B-box type zinc finger protein with CCT domain	GO:0005634;GO:0008270	AT5G48250	2.15776856069769	0.00630221729823506
Cc09_g00910	GSCOC_T00017883001	A0A068U831	Fumarylacetoacetase	GO:0004334;GO:0046872;GO:0006559;GO:0006572	AT1G12050	2.15535001747523	3.05485194426363e-06
Cc08_g12660	GSCOC_T00030447001	A0A068UQP9	unknown protein; FUNCTIONS IN			2.15528256004399	0.00053583173030744
Cc02_g13370	GSCOC_T00029167001	A0A068TTB1	Callose synthase 11	GO:0000148;GO:0016021;GO:0003843;GO:0006075	AT4G04970	2.14889755379047	0.00356921571249814
Cc02_g15920	GSCOC_T00014059001	A0A068TNE8	Probable LRR receptor-like serine/threonine-protein kinase At1g07650	GO:0016021;GO:0005524;GO:0004672	AT3G14840	2.14460160432083	0.00978525612651248
Cc03_g01220	GSCOC_T00025728001	A0A068TTY2	COBRA-like protein 7	GO:0031225;GO:0016021;GO:0010215	AT4G16120	2.14263656678189	1.139007812527e-05
Cc06_g12280	GSCOC_T00041555001	A0A068U3E1	Putative Protein of unknown function (DUF1677)			2.14095009950303	0.00562926061152257
Cc05_g04450	GSCOC_T00031671001	A0A068URC5	Putative late blight resistance protein homolog R1B-16	GO:0043531;GO:0006952		2.13759669324881	2.34887862031169e-05
Cc04_g05080	GSCOC_T00022253001	A0A068TQF4	Probable WRKY transcription factor 40	GO:0005634;GO:0003700;GO:0043565	AT1G80840	2.13717836739819	0.000121871680826659
Cc08_g16060	GSCOC_T00035555001	A0A068UUS4	Putative RING-H2 finger protein ATL21A	GO:0016021;GO:0030247	AT5G07040	2.13691953018686	1.8519801609505e-06
Cc01_g19860	GSCOC_T00016003001	A0A068U4V4	oxidoreductase, 2OG-Fe(II) oxygenase family protein		AT4G02940	2.13234579836041	0.00223479318194601
Cc01_g00370	GSCOC_T00013679001	A0A068VNW8	Benzyl alcohol O-benzoyltransferase	GO:0016747	AT3G03480	2.12916909252874	6.47080558029874e-05
Cc08_g15560	GSCOC_T00035493001	A0A068UUK7	Cation/H( ) antiporter 17	GO:0016021;GO:0015299	AT5G41610	2.12218220602091	0.000142750734452873
Cc08_g15400	GSCOC_T00035469001	A0A068UU68	Putative Late embryogenesis abundant (LEA) hydroxyproline-rich glycoprotein family	GO:0016021		2.11503449858266	0.000257223175016436
Cc01_g18440	GSCOC_T00016205001	A0A068U633	Tetratricopeptide repeat (TPR)-like superfamily protein			2.11269151995973	5.69466509442157e-06
Cc01_g06680	GSCOC_T00030066001	A0A068UMZ7	Protein kinase APK1A, chloroplastic	GO:0005524;GO:0004674	AT2G02800	2.1119037370264	2.15031452990976e-07
Cc08_g01680	GSCOC_T00038347001	A0A068UXZ5	unknown protein; FUNCTIONS IN	GO:0016021		2.10384387664941	0.000816274961370597
Cc02_g03290	GSCOC_T00020206001	A0A068U9M1	RHOMBOID-like 2	GO:0016021;GO:0004252	AT1G63120	2.10151186813908	2.40634249626752e-06
Cc10_g02080	GSCOC_T00024704001	A0A068UII2	PLC-like phosphodiesterases superfamily protein	GO:0008081;GO:0006629		2.10056202415522	1.0324525652279e-05
Cc05_g11460	GSCOC_T00021312001	A0A068UEB6	sodium/calcium exchanger family protein / calcium-binding EF hand family protein	GO:0016021;GO:0005509;GO:0055085	AT1G53210	2.09596483273054	3.66988914093871e-05
Cc08_g09520	GSCOC_T00026893001	A0A068UI56	Dehydration-responsive element-binding protein 3	GO:0005634;GO:0003677;GO:0003700	AT5G11590	2.09543367062878	0.00117831485419672
Cc00_g17430	GSCOC_T00013477001	A0A068VHM7	Isoflavone reductase homolog P3		AT1G75280	2.08708445619634	1.30512456760784e-07
Cc10_g01580	GSCOC_T00024638001	A0A068UIC6	Putative uncharacterized protein		AT4G36040	2.08072996501959	0.000187120026116345
Cc00_g13770	GSCOC_T00013300001	A0A068VH80	Alpha-aminoadipic semialdehyde synthase	GO:0016491		2.07956351755448	0.00310612718226125
Cc06_g22380	GSCOC_T00017200001	A0A068V6D6	Putative F-box protein At5g07610		AT1G70970	2.07691398512832	5.04073426440307e-06
Cc06_g11830	GSCOC_T00041611001	A0A068U3I9	Threonine synthase 1, chloroplastic	GO:0009570;GO:0005829;GO:0030170;GO:0004795;GO:0006520	AT4G29840	2.07215219185543	0.000363253488011484
Cc06_g18910	GSCOC_T00028930001	A0A068ULU4	Plant protein 1589 of unknown function			2.07015810959692	2.08539533108492e-07
Cc02_g10760	GSCOC_T00029494001	A0A068TU89	Major facilitator superfamily protein	GO:0016021;GO:0009506;GO:0022857;GO:0002239		2.06827282492927	0.00062320699674312
Cc07_g07540	GSCOC_T00040104001	A0A068U3C2	Homeobox-leucine zipper protein HAT22	GO:0005634;GO:0043565;GO:0006355	AT4G37790	2.06781099774697	4.44929459952031e-09
Cc02_g02860	GSCOC_T00020155001	A0A068UAB4	4-coumarate--CoA ligase-like 10	GO:0048046;GO:0009570;GO:0009506;GO:0050203;GO:0050832;GO:0033611;GO:0010030;GO:0046686;GO:0010214	AT3G48990	2.06478436123198	8.69250765224248e-08
Cc04_g17190	GSCOC_T00035856001	A0A068UVN7	Putative Aldose 1-epimerase	GO:0004034;GO:0030246;GO:0019318		2.06331136235832	7.21468130576254e-05
Cc05_g16500	GSCOC_T00038551001	A0A068UYR3	Metal tolerance protein 10	GO:0016021;GO:0008324	AT1G16310	2.05537470145887	0.000336388762761648
Cc06_g08270	GSCOC_T00031152001	A0A068UQ89	Putative Umecyanin	GO:0016021;GO:0009055	AT5G20230	2.0534012340533	0.001006684426669
Cc07_g05180	GSCOC_T00039783001	A0A068U473	Putative Uncharacterized membrane protein YOL092W	GO:0016021		2.05141534414041	1.16904391167068e-05
Cc10_g07360	GSCOC_T00034533001	A0A068TXK0	Putative uncharacterized protein		AT2G41010	2.04420736136866	0.00306727152680574
Cc02_g18620	GSCOC_T00014412001	A0A068TP77	Putative Probable carboxylesterase 7	GO:0016787	AT2G03550	2.04103970636218	4.78114808017233e-05
Cc00_g28790	GSCOC_T00012906001	A0A068VL76	Isoflavone reductase homolog P3		AT1G75280	2.03753994983642	2.35180964350949e-05
Cc03_g09480	GSCOC_T00030926001	A0A068URN7	Hypothetical protein			2.03737781028591	0.00525677764142863
Cc07_g03420	GSCOC_T00039571001	A0A068U1S7	Putative Vacuolar amino acid transporter 1	GO:0016021	AT5G15240	2.03362012821153	1.22543500454277e-05
Cc02_g11550	GSCOC_T00029398001	A0A068TUN9	Tryptophan synthase beta chain 2, chloroplastic	GO:0004834	AT4G27070	2.03151975995035	0.000160629473925173
Cc11_g13140	GSCOC_T00032220001	A0A068TVL0	Putative Probable ran guanine nucleotide release factor			2.03060695484503	5.30418910237936e-05
Cc10_g06310	GSCOC_T00034677001	A0A068TXV9	Uncharacterized aarF domain-containing protein kinase At1g71810, chloroplastic	GO:0010287;GO:0005524;GO:0004672	AT1G71810	2.02568075725927	7.87941561403816e-07
Cc02_g00270	GSCOC_T00019803001	A0A068UBA9	Putative ATPase family AAA domain-containing protein 3-A	GO:0005739;GO:0005524;GO:0007005		2.02483769374662	8.60211241341933e-05
Cc08_g04350	GSCOC_T00034257001	A0A068UVY5	Putative UDP-glycosyltransferase 73C7	GO:0008194		2.02331903683763	0.00182312753708955
Cc04_g05310	GSCOC_T00022280001	A0A068TPM4	Putative unknown protein; BEST Arabidopsis thaliana protein match is			2.02212521902105	1.95877860459406e-05
Cc06_g17240	GSCOC_T00036358001	A0A068UW69	Putative Uncharacterized conserved protein (DUF2215)	GO:0016021		2.02177985975356	0.000258875674604726
Cc04_g15740	GSCOC_T00042352001	A0A068V2T7	Probable peptide/nitrate transporter At5g62680	GO:0016021;GO:0022857	AT5G62680	2.01891095573791	0.00429979362951574
Cc10_g14960	GSCOC_T00033655001	A0A068USW5	Abscisic stress-ripening protein 3			2.01538754270893	2.43428205042135e-06
Cc02_g11030	GSCOC_T00029464001	A0A068TUZ1	Transmembrane amino acid transporter family protein	GO:0016021	AT2G39130	2.01488159788444	0.00487115238047331
Cc04_g10490	GSCOC_T00042601001	A0A068V324	Putative uncharacterized protein	GO:0005634;GO:0003677		2.0119819205955	2.05718493562407e-05
Cc11_g08050	GSCOC_T00032927001	A0A068TY23	Glucan endo-1,3-beta-glucosidase 3	GO:0046658;GO:0004553;GO:0005975		2.0117272897815	0.00569390150660948
Cc09_g07450	GSCOC_T00036255001	A0A068UVM1	Reticuline oxidase-like protein	GO:0071949;GO:0016491	AT4G20840	2.01080251272281	9.26068873184561e-05
Cc02_g05970	GSCOC_T00039118001	A0A068UZW4	Putative Dehydration-responsive element-binding protein 2C	GO:0005634;GO:0003677;GO:0003700	AT2G40340	2.0071487735512	7.7135170742251e-05
Cc01_g13580	GSCOC_T00028328001	A0A068UKZ1	17.5 kDa class I heat shock protein		AT2G29500	2.00608609315575	0.00818943603887563
Cc10_g01990	GSCOC_T00024694001	A0A068TYX8	Histone H3.3	GO:0000786;GO:0005634;GO:0003677;GO:0046982	AT4G40040	2.00571883594049	0.0009847053686526
Cc03_g02410	GSCOC_T00025885001	A0A068TS91	Sodium/hydrogen exchanger 2	GO:0016021;GO:0015385;GO:0006885	AT3G05030	2.00386765621714	3.62641215256564e-05
Cc08_g03420	GSCOC_T00010771001	A0A068VCF6	Putative uncharacterized protein			2.00091915619479	0.000121317587747015
Cc03_g04380	GSCOC_T00026152001	A0A068TT42	ATP sulfurylase 1, chloroplastic	GO:0004781;GO:0000103	AT3G22890	1.9942553010952	1.26183977478761e-05
Cc11_g04190	GSCOC_T00001330001	A0A068VB88	Putative polyol transporter 1	GO:0016021;GO:0022857	AT2G16120	1.99220964117831	0.000177071498444309
Cc06_g09330	GSCOC_T00041928001	A0A068U492	Predicted protein			1.98609694763175	0.000129854737608552
Cc05_g11890	GSCOC_T00021257001	A0A068UBJ6	MATE efflux family protein ALF5	GO:0016021;GO:0015297;GO:0042910	AT3G23560	1.97667649295041	3.91320069017378e-06
Cc07_g00500	GSCOC_T00019122001	A0A068V7Y7	Lysine histidine transporter 1	GO:0016021	AT5G40780	1.97602032353359	0.000601692846138385
Cc08_g10300	GSCOC_T00026994001	A0A068UJ62	Hypothetical protein	GO:0016021		1.96685541662576	0.00215201556592438
Cc10_g00690	GSCOC_T00024526001	A0A068UGH7	Putative Pre-rRNA-processing protein TSR1 homolog	GO:0005634;GO:0042254		1.96680756408513	8.7649808655224e-05
Cc07_g01520	GSCOC_T00039324001	A0A068U145	beta-1,4-N-acetylglucosaminyltransferase family protein	GO:0016021;GO:0003830;GO:0006487		1.96582836853923	3.2458059933336e-05
Cc05_g04760	GSCOC_T00035011001	A0A068UVZ4	Putative Vacuolar amino acid transporter 1	GO:0016021	AT5G15240	1.96435940154638	0.000134420326703473
Cc01_g08010	GSCOC_T00015487001	A0A068V4U3	Putative Probable carboxylesterase 15	GO:0016787	AT5G06570	1.9634977776142	0.000122580479891733
Cc04_g06710	GSCOC_T00022466001	A0A068TPZ6	Putative MATE efflux family protein DTX1	GO:0016021;GO:0015297;GO:0042910	AT5G52450	1.96199124793196	0.000669552095270455
Cc06_g03950	GSCOC_T00023696001	A0A068UEZ1	Auxin response factor 18	GO:0005634;GO:0003677;GO:0009734;GO:0006355	AT4G30080	1.95618425756755	0.0014257559902454
Cc07_g05920	GSCOC_T00039880001	A0A068U2D4	Putative Uncharacterized membrane protein At3g27390	GO:0016021	AT3G27390	1.95406558152747	0.00486890763765854
Cc08_g00140	GSCOC_T00005569001	A0A068VE29	Hypothetical protein			1.95316337618464	1.85859568581676e-05
Cc04_g07130	GSCOC_T00022518001	A0A068TQW5	LOB domain-containing protein 41		AT3G02550	1.95258837865513	0.00176247390049566
Cc02_g34210	GSCOC_T00000657001	A0A068V9A9	Pre-mRNA-splicing factor SF2	GO:0003723	AT1G09140	1.95219695208117	3.30551286084481e-06
Cc08_g14720	GSCOC_T00030189001	A0A068UN83	Putative bromo-adjacent homology (BAH) domain-containing protein			1.95201567723475	3.85760711430951e-05
Cc05_g11280	GSCOC_T00021336001	A0A068UBX1	Putative Protein DJ-1		AT1G53280	1.9400957301498	2.83799694275696e-06
Cc05_g03920	GSCOC_T00017313001	A0A068V6S0	Uncharacterized protein			1.93840977617693	0.000498854418244418
Cc02_g37320	GSCOC_T00028008001	A0A068UKQ1	F-box protein PP2-A13	GO:0009611	AT1G12710	1.93830706075395	0.00854736711176695
Cc00_g21200	GSCOC_T00009601001	A0A068VM49	Plant neutral invertase family protein	GO:0005739;GO:0033926;GO:0004575;GO:0007623;GO:0010029;GO:0048510;GO:0005987	AT3G06500	1.93712515590643	4.32655957048765e-06
Cc06_g13760	GSCOC_T00041350001	A0A068U3M0	Putative Glutamate receptor 2.2	GO:0016021;GO:0015276	AT2G29110	1.93358986157339	0.0013976442200791
Cc00_g13810	GSCOC_T00007198001	A0A068VJT8	Putative Long-chain-alcohol O-fatty-acyltransferase	GO:0016021;GO:0008374	AT3G51970	1.93184385946682	0.00119962022114941
Cc10_g07630	GSCOC_T00034498001	A0A068U070	Putative uncharacterized protein			1.93065569814387	0.00436231377958347
Cc05_g01990	GSCOC_T00040825001	A0A068V174	Zinc finger protein CONSTANS-LIKE 9	GO:0005634;GO:0008270	AT5G48250	1.92805395018624	0.000146901274861287
Cc01_g12510	GSCOC_T00028188001	A0A068UL95	ACT domain-containing protein		AT2G39570	1.92556731992353	1.3943245073256e-06
Cc09_g01060	GSCOC_T00017862001	A0A068U820	Protein of unknown function (DUF3537)	GO:0016021		1.92410297191623	9.19634499415224e-05
Cc04_g06140	GSCOC_T00022395001	A0A068TSK6	Putative Uncharacterized protein At3g17950		AT3G17950	1.92224251173099	0.00788196138754887
Cc04_g04670	GSCOC_T00022199001	A0A068TPP8	Protein TOPLESS	GO:0006355	AT1G15750	1.92194035941601	6.67275559068392e-05
Cc07_g09380	GSCOC_T00037250001	A0A068U0J3	Proline-rich receptor-like protein kinase PERK5	GO:0016021;GO:0005524;GO:0004672		1.92124373616611	0.00992789695618137
Cc06_g08960	GSCOC_T00041982001	A0A068U511	GTP-binding nuclear protein Ran-3	GO:0005634;GO:0005525;GO:0003924;GO:0006913;GO:0015031	AT5G55190	1.91846632435007	2.06329388083944e-05
Cc06_g05350	GSCOC_T00043081001	A0A068V663	Putative UPF0481 protein At3g47200	GO:0016021		1.91833951838615	1.95877860459406e-05
Cc06_g09930	GSCOC_T00041850001	A0A068U442	Putative RNA-binding protein-related	GO:0046872;GO:0003723;GO:0006355		1.91762381741364	0.000364935302691365
Cc01_g21460	GSCOC_T00004978001	A0A068V931	Calcium-dependent phosphotriesterase superfamily protein			1.91349272660716	0.00673965247016943
Cc04_g15150	GSCOC_T00002599001	A0A068VF71	Putative NEP1-interacting protein-like 2	GO:0016021;GO:0010200	AT1G74410	1.91291675604544	7.80432137447838e-05
Cc04_g04440	GSCOC_T00022169001	A0A068TS49	Protein kinase superfamily protein	GO:0005524;GO:0004672		1.91117829577833	2.0394392974481e-06
Cc10_g05550	GSCOC_T00034793001	A0A068TYB4	Putative Arginine N-methyltransferase 2	GO:0016274	AT5G07840	1.91057783818263	0.00077072978156414
Cc02_g19520	GSCOC_T00014520001	A0A068TPH1	transducin family protein / WD-40 repeat family protein	GO:0080008;GO:0071493		1.90834462670176	0.00190806655477769
Cc03_g09610	GSCOC_T00030945001	A0A068UPC9	Putative UDP-glycosyltransferase 76E11	GO:0008194	AT3G46670	1.90482310070169	0.00532968443531186
Cc02_g13120	GSCOC_T00029198001	A0A068TTD3	Putative CBS domain-containing protein CBSX5		AT4G27460	1.90295121886776	7.34190311607495e-06
Cc10_g03070	GSCOC_T00024826001	A0A068UGY5	Protein kinase superfamily protein	GO:0005524;GO:0004672	AT3G17850	1.90160309406487	1.95877860459406e-05
Cc11_g14550	GSCOC_T00032044001	A0A068TW89	Aldehyde dehydrogenase family 2 member B7, mitochondrial	GO:0016620	AT1G23800	1.89876689235857	0.00629462940900485
Cc04_g10510	GSCOC_T00042603001	A0A068V592	Putative Nuclear pore complex protein Nup155	GO:0005643;GO:0005730;GO:0005886;GO:0009506;GO:0017056	AT1G14850	1.89874205041626	0.00024411940588663
Cc04_g03800	GSCOC_T00022087001	A0A068TQ99	Plastidic ATP/ADP-transporter	GO:0031969;GO:0016021;GO:0005524;GO:0005471	AT1G80300	1.89839388590279	8.76684082214949e-06
Cc02_g32950	GSCOC_T00016726001	A0A068V5P7	Putative Bifunctional 3-dehydroquinate dehydratase/shikimate dehydrogenase, chloroplastic	GO:0003855;GO:0004764	AT3G06350	1.89237919901127	0.00290641287801884
Cc00_g19580	GSCOC_T00006064001	A0A068VIN3	heteroglycan glucosidase 1	GO:0030246;GO:0003824;GO:0005975		1.89235252464828	0.00308461327020576
Cc07_g05250	GSCOC_T00039791001	A0A068U1K5	Hypothetical protein			1.89053468199642	0.000942760880270663
Cc02_g18020	GSCOC_T00014335001	A0A068TP09	Putative Plastid division protein PDV2	GO:0031359;GO:0010020	AT2G16070	1.88917721743907	0.000184571962133667
Cc00_g28260	GSCOC_T00002218001	A0A068VLB8	Ent-kaurene oxidase, chloroplastic	GO:0016021;GO:0020037;GO:0005506;GO:0004497;GO:0016705	AT5G25900	1.88755763357827	8.73035284941223e-05
Cc08_g10050	GSCOC_T00026964001	A0A068UJ45	BEST Arabidopsis thaliana protein match is	GO:0016021		1.88726984627393	3.46523347444267e-05
Cc06_g06180	GSCOC_T00031416001	A0A068USP2	Putative Uncharacterized protein RP120		AT5G22350	1.8746467051042	0.00186137326755983
Cc06_g08720	GSCOC_T00031093001	A0A068UQ49	unknown protein; Has 54 Blast hits to 54 proteins in 26 species	GO:0016021;GO:0016021		1.87423478961648	0.00604162077517208
Cc04_g11680	GSCOC_T00037371001	A0A068UW48	Putative Octicosapeptide/Phox/Bem1p family protein			1.87319397180868	0.000594608998202342
Cc05_g08620	GSCOC_T00016889001	A0A068V5L8	Hypothetical protein			1.86987193069828	2.63657722865169e-05
Cc01_g04330	GSCOC_T00004454001	A0A068V9F7	Putative Transducin/WD40 repeat-like superfamily protein			1.86622975558337	0.000174224191834473
Cc08_g14230	GSCOC_T00030252001	A0A068UMX5	Thaumatin-like protein		AT4G11650	1.86612441346434	0.00156185926524609
Cc02_g37480	GSCOC_T00027984001	A0A068UK72	Protein of unknown function (DUF616)	GO:0005768;GO:0005802		1.86567968628239	0.00171476176865178
Cc04_g14700	GSCOC_T00040731001	A0A068V3B5	pheophytinase		AT5G13800	1.86565712550438	4.61059900916966e-07
Cc02_g14810	GSCOC_T00013902001	A0A068TLD3	Putative uncharacterized protein	GO:0003723	AT3G15010	1.86423025519184	0.000173320224690756
Cc04_g02430	GSCOC_T00021915001	A0A068TPI7	Putative DNA repair protein RadA homolog	GO:0005524;GO:0003684;GO:0008094;GO:0006281		1.85955863889558	0.00608334920228172
Cc10_g03100	GSCOC_T00024830001	A0A068UG39	unknown protein; Has 219 Blast hits to 202 proteins in 78 species			1.85943684368298	3.69362514248626e-06
Cc08_g06370	GSCOC_T00040938001	A0A068V0X9	Putative Pentatricopeptide repeat-containing protein At5g24830			1.85330188379345	0.00803691396020578
Cc01_g12520	GSCOC_T00023550001	A0A068UDJ6	Histone H4	GO:0042025;GO:0000786;GO:0005634;GO:0003677;GO:0046982	AT1G07820	1.84856251277872	0.00214455920319932
Cc11_g07690	GSCOC_T00018017001	A0A068V8M3	Adagio protein 3		AT1G68050	1.84830973344538	0.00576373873788266
Cc06_g11120	GSCOC_T00041695001	A0A068U400	Pollen-specific protein SF21	GO:0016021	AT5G56750	1.84770701744184	0.000105366951443664
Cc10_g05500	GSCOC_T00034799001	A0A068TYB7	NAD(P)-binding Rossmann-fold superfamily protein		AT4G24220	1.84732609431456	0.00108981633804628
Cc00_g22270	GSCOC_T00007436001	A0A068VJT0	Putative unknown protein; BEST Arabidopsis thaliana protein match is			1.84709853064784	9.27574129259193e-05
Cc11_g03150	GSCOC_T00025459001	A0A068UJY6	Putative DNA-directed RNA polymerase I subunit RPA2	GO:0005634;GO:0003677;GO:0003899;GO:0032549;GO:0006351	AT1G29940	1.8423454115119	0.00430820233033116
Cc02_g04680	GSCOC_T00020387001	A0A068UAZ2	Putative Uncharacterized protein At3g06530			1.83283497475732	0.00263586312683104
Cc02_g21470	GSCOC_T00014789001	A0A068TQ00	Outer envelope protein 64, mitochondrial	GO:0016021;GO:0005739;GO:0030150	AT5G09420	1.83239708059172	0.00140997582069705
Cc04_g04820	GSCOC_T00022221001	A0A068TPR2	unknown protein; BEST Arabidopsis thaliana protein match is			1.8323043996698	4.63454892595762e-06
Cc07_g07860	GSCOC_T00040148001	A0A068U2I0	Heat shock 70 kDa protein, mitochondrial	GO:0005618;GO:0005739;GO:0005774;GO:0005524;GO:0051082;GO:0008270;GO:0006457;GO:0046686	AT5G09590	1.83037747552878	0.000180997021181221
Cc07_g12920	GSCOC_T00036814001	A0A068U090	Putative Universal stress protein A-like protein	GO:0005737;GO:0005886;GO:0043621		1.82899623351944	0.00790436406781881
Cc08_g14800	GSCOC_T00035389001	A0A068UTZ6	GMP synthase [glutamine-hydrolyzing]	GO:0005524;GO:0003922;GO:0016462;GO:0006541		1.82800225846919	0.000203541711659854
Cc02_g32230	GSCOC_T00012957001	A0A068VCS1	Sodium/hydrogen exchanger 2	GO:0016021;GO:0015385;GO:0006885	AT3G05030	1.82582372550774	0.000120782973001016
Cc08_g00680	GSCOC_T00038483001	A0A068UY86	Hypothetical protein		AT2G25490	1.82235914665003	0.00255343857055322
Cc06_g05890	GSCOC_T00043157001	A0A068V4C7	Putative unknown protein; FUNCTIONS IN			1.82217124200274	0.00364734897680668
Cc01_g19930	GSCOC_T00015995001	A0A068U7J2	Receptor-like cytosolic serine/threonine-protein kinase RBK2	GO:0005524;GO:0004674	AT3G05140	1.81498504844939	0.000112022304516576
Cc07_g05210	GSCOC_T00039787001	A0A068U1L9	Putative protein kinase family protein / peptidoglycan-binding LysM domain-containing protein	GO:0016021;GO:0005524;GO:0004672	AT2G23770	1.80647133669931	0.00404933620075329
Cc05_g01700	GSCOC_T00015744001	A0A068V779	Putative methyltransferase NSUN6	GO:0008168;GO:0003723;GO:0032259		1.80630559937571	0.0024316247920941
Cc07_g19320	GSCOC_T00018603001	A0A068U7R8	Putative Probable E3 ubiquitin-protein ligase HERC4	GO:0009881;GO:0042803;GO:0010224	AT5G63860	1.80328517276255	2.31568728955004e-05
Cc07_g03090	GSCOC_T00039524001	A0A068U242	Putative F-box/WD repeat-containing protein 7			1.80216537564655	0.000127891254076101
Cc10_g03930	GSCOC_T00034998001	A0A068U197	Uncharacterized protein	GO:0016021;GO:0006351		1.79751087797321	1.87796555941698e-06
Cc08_g00430	GSCOC_T00038523001	A0A068UYB4	Putative Extended synaptotagmin-3	GO:0016021;GO:0008289;GO:0006869	AT1G05500	1.79481015500689	0.000236571699601583
Cc06_g01960	GSCOC_T00023436001	A0A068UDA4	17.5 kDa class I heat shock protein		AT1G53540	1.7916847663842	0.0084072984806024
Cc08_g11020	GSCOC_T00027092001	A0A068UIL2	Putative Puromycin-sensitive aminopeptidase	GO:0005829;GO:0005886;GO:0004177;GO:0008237;GO:0010013;GO:0008270	AT4G33090	1.79127042992866	0.000991883288728432
Cc00_g34980	GSCOC_T00013334001	A0A068VNK7	UDP-glucose flavonoid 3-O-glucosyltransferase 6	GO:0016021	AT3G21790	1.78489944102825	0.00421718631482303
Cc03_g04020	GSCOC_T00026105001	A0A068TUR0	Putative Non-specific lipid-transfer protein-like protein At2g13820	GO:0008289;GO:0006869	AT1G03103	1.78129863646382	0.00333033087334536
Cc07_g08960	GSCOC_T00040288001	A0A068U2S2	AWPM-19-like family protein	GO:0016021		1.77781220295432	0.000141758293805512
Cc05_g11510	GSCOC_T00021307001	A0A068UEB1	Homogentisate 1,2-dioxygenase	GO:0004411;GO:0006559;GO:0006570	AT5G54080	1.77566058723912	3.75397833066105e-05
Cc02_g15910	GSCOC_T00014058001	A0A068TLN0	Probable LRR receptor-like serine/threonine-protein kinase RFK1	GO:0016021;GO:0005524;GO:0004672	AT1G29750	1.77297778544919	0.00154945837240224
Cc07_g01960	GSCOC_T00039375001	A0A068U0P6	Putative unknown protein; BEST Arabidopsis thaliana protein match is	GO:0016021		1.77154853633519	0.000980348741952434
Cc04_g12040	GSCOC_T00005246001	A0A068V8C5	Putative Leucine-rich repeat protein kinase family protein	GO:0016021		1.77138762464291	0.00667641293547165
Cc07_g03670	GSCOC_T00039611001	A0A068U1U4	Putative uncharacterized protein	GO:0005634;GO:0003677;GO:0003700	AT5G19790	1.76977570047337	0.00203306082326747
Cc10_g01180	GSCOC_T00024584001	A0A068UI93	Calcium-dependent protein kinase 29	GO:0005524;GO:0005509;GO:0004672;GO:0050832;GO:1901002	AT1G76040	1.76820619355005	0.00158815334583088
Cc04_g09530	GSCOC_T00022844001	A0A068TRQ5	Putative RNA-binding (RRM/RBD/RNP motifs) family protein	GO:0003723	AT3G56860	1.76746490962635	0.00985320579887224
Cc08_g01530	GSCOC_T00038372001	A0A068UY10	Beta-amylase 3, chloroplastic	GO:0102229;GO:0016161;GO:0000272	AT4G17090	1.76460527516119	0.00810319672374715
Cc02_g06800	GSCOC_T00039230001	A0A068V0L0	Putative Tetratricopeptide repeat (TPR)-like superfamily protein			1.76118433482273	1.10621411593468e-05
Cc08_g00610	GSCOC_T00038491001	A0A068UYY8	Putative unknown protein; FUNCTIONS IN			1.76064207724764	0.000798318702015343
[truncated: 426 more rows]
