# Supplementary material for: Understanding the Impact of Drought in Coffea Genotypes: Transcriptomic Analysis Supports a Common High Resilience to Moderate Water Deficit but a Genotype Dependent Sensitivity to Severe Water Deficit
Source: MDPI journal article supplement (doi:10.3390/agronomy11112255), 2021-11-08
Supplement: s1 [file s1 › Table_S5.xlsx]

## Sheet: Down-regulated
Gene ID	ORF Name	Uniprot acession	Protein Name	GO Terms	TAIR	Log2FC	FDR
Cc06_g19110	GSCOC_T00028962001	A0A068ULW7	Putative Transcription factor ORG2	GO:0003677;GO:0003700;GO:0046983;GO:1900706;GO:0045893;GO:0010104;GO:0006357;GO:0046685;GO:0046686;GO:0009723;GO:1990641;GO:0071731	AT3G56970	-25.6562351543944	5.09751062292007e-07
Cc02_g05960	GSCOC_T00039117001	A0A068UZI7	Laccase-5	GO:0048046;GO:0005507;GO:0052716;GO:0046274	AT2G40370	-11.3019731439896	0.000800645697942879
Cc00_g31960	GSCOC_T00012136001	A0A068VME0	COBRA-like protein 4	GO:0031225;GO:0010215	AT5G15630	-10.9637457471222	0.000181885301050045
Cc04_g07330	GSCOC_T00022544001	A0A068TQY3	Putative Protein ASPARTIC PROTEASE IN GUARD CELL 1	GO:0004190;GO:0009737;GO:0009414	AT3G18490	-10.5459307001691	0.00634442455710012
Cc06_g01530	GSCOC_T00023375001	A0A068UDZ3	Glycerol-3-phosphate acyltransferase 6	GO:0016021;GO:0016746	AT2G38110	-10.3151921454737	1.55608585967889e-11
Cc07_g11210	GSCOC_T00037027001	A0A068U2L6	Peroxidase 64	GO:0005576;GO:0020037;GO:0046872;GO:0004601;GO:0042744;GO:0006979	AT5G42180	-9.8454522233106	0.00956511480344753
Cc09_g03130	GSCOC_T00017586001	A0A068U6V0	GDSL esterase/lipase At5g33370	GO:0016788;GO:0042538;GO:0010226;GO:0009751	AT5G33370	-9.33429115527983	3.08020636253703e-06
Cc06_g02050	GSCOC_T00023445001	A0A068UEC8	RHO guanyl-nucleotide exchange factor 7	GO:0005089		-9.16869460417982	1.56013677162732e-05
Cc06_g02440	GSCOC_T00023500001	A0A068UG34	Laccase-4	GO:0048046;GO:0005507;GO:0052716;GO:0046274		-9.15493618983282	4.35460051345058e-08
Cc01_g10980	GSCOC_T00024214001	A0A068UHI1	Uncharacterized membrane protein At1g06890	GO:0016021	AT2G28315	-9.06141862708914	2.54004667465828e-08
Cc02_g16160	GSCOC_T00014093001	A0A068TLQ6	Putative GDSL esterase/lipase At1g29670	GO:0016788		-8.91984442617174	3.92378991582891e-06
Cc02_g19540	GSCOC_T00014522001	A0A068TLR5	Hypothetical protein			-8.90511298623059	0.00852132988924604
Cc02_g39350	GSCOC_T00027728001	A0A068UKG8	Cytochrome b561/ferric reductase transmembrane with DOMON related domain	GO:0016021;GO:0055114		-8.69127583461286	1.11391512274164e-08
Cc03_g01290	GSCOC_T00025735001	A0A068TR76	Major allergen Pru ar 1	GO:0010427;GO:0004864;GO:0038023;GO:0009738;GO:0006952	AT1G24020	-8.45599048335136	6.43325023834214e-08
Cc02_g16500	GSCOC_T00014143001	A0A068TL45	Hypothetical protein		AT4G38770	-8.45422951179376	0.000822139784540815
Cc03_g13730	GSCOC_T00031728001	A0A068UQK8	Putative BURP			-8.41417745236831	0.000213246108978539
Cc01_g15270	GSCOC_T00016583001	A0A068U789	Expansin-A2	GO:0005618;GO:0005576;GO:0016020;GO:0009664	AT2G40610	-8.37894555394908	0.000107750741501113
Cc02_g14230	GSCOC_T00013829001	A0A068TLD8	Rac-like GTP-binding protein 7	GO:0005525;GO:0003924;GO:0007264		-8.36508407991231	9.55444890425993e-06
Cc06_g01150	GSCOC_T00023326001	A0A068UE24	Plant protein of unknown function (DUF828)	GO:0016021	AT5G01360	-8.36413137616008	2.26349800790897e-06
Cc10_g11450	GSCOC_T00013664001	A0A068V9F2	Putative Gibberellin-regulated protein 9			-8.35484630677625	9.55444890425993e-06
Cc03_g15230	GSCOC_T00026792001	A0A068UHX6	Probable leucine-rich repeat receptor-like protein kinase At5g49770	GO:0016021;GO:0005524;GO:0004674	AT5G49770	-8.34661434195077	1.21903162011451e-07
Cc08_g02860	GSCOC_T00037785001	A0A068UWW0	Hypothetical protein			-8.29392770488847	0.000107992682982687
Cc00_g18080	GSCOC_T00007955001	A0A068VHU2	Putative Germin-like protein subfamily T member 2	GO:0048046;GO:0005618;GO:0030145;GO:0045735		-8.28679612252716	0.00114560289873478
Cc10_g06610	GSCOC_T00034633001	A0A068TXS3	Hypothetical protein			-8.27655021169357	6.35703274915849e-06
Cc03_g01620	GSCOC_T00025779001	A0A068TU16	Putative Multidrug and toxin extrusion protein 1	GO:0016021;GO:0015297;GO:0042910		-8.1290540912526	0.0016514059322716
Cc11_g10950	GSCOC_T00032505001	A0A068TX76	Hypothetical protein			-8.12735845769377	1.18424940786446e-11
Cc00_g02690	GSCOC_T00006658001	A0A068VDI7	Putative Subtilisin-like protease	GO:0016021;GO:0004252		-8.11843580587894	5.53680330762869e-07
Cc00_g21930	GSCOC_T00010625001	A0A068VJP3	Miraculin	GO:0004866		-8.10456199316233	0.00129284070564325
Cc10_g15770	GSCOC_T00033771001	A0A068UV32	Putative Protein ASPARTIC PROTEASE IN GUARD CELL 1	GO:0004190;GO:0043067	AT1G09750	-7.97211506927197	0.00839667692481727
Cc07_g00690	GSCOC_T00019147001	A0A068V7U4	Putative Mavicyanin	GO:0009055		-7.96201428638435	8.30711842541164e-11
Cc04_g06720	GSCOC_T00022468001	A0A068TQ63	Putative Glycosyltransferase family 61 protein	GO:0016021;GO:0016757		-7.86334459075503	0.00623112097748349
Cc02_g14000	GSCOC_T00029070001	A0A068TTU1	Putative Homeobox-leucine zipper protein ATHB-52	GO:0005634;GO:0043565;GO:0006355		-7.82462411809924	0.00252771395670453
Cc07_g16990	GSCOC_T00037488001	A0A068UWN3	Putative cytochrome P450, family 76, subfamily C, polypeptide 4	GO:0016021;GO:0020037;GO:0005506;GO:0004497;GO:0016705		-7.80316056299475	7.44107400038154e-05
Cc11_g14560	GSCOC_T00032042001	A0A068TXY9	Probable xyloglucan endotransglucosylase/hydrolase protein 33	GO:0048046;GO:0005618;GO:0005887;GO:0004553;GO:0016762;GO:0042546;GO:0009831;GO:0010411		-7.66488550874639	1.42318475981463e-17
Cc07_g06070	GSCOC_T00039901001	A0A068U2F1	Putative uncharacterized protein			-7.63243813096493	2.14852747737298e-05
Cc08_g13970	GSCOC_T00030280001	A0A068UND7	Ethylene-responsive transcription factor ERF025	GO:0005634;GO:0003677;GO:0003700		-7.60784369792433	0.000284730965202588
Cc00_g12380	GSCOC_T00013523001	A0A068VG39	Putative Flavanone 7-O-glucoside 2''-O-beta-L-rhamnosyltransferase	GO:0008194		-7.57760294039879	0.0058484101734612
Cc07_g11540	GSCOC_T00036990001	A0A068TZW8	TRICHOME BIREFRINGENCE-LIKE 34	GO:0016021		-7.55609679784578	0.000346555959927322
Cc00_g15190	GSCOC_T00005655001	A0A068VGY1	Glucan endo-1,3-beta-glucosidase	GO:0004553;GO:0005975		-7.51039903987045	5.11742888823211e-06
Cc07_g19200	GSCOC_T00018625001	A0A068U8J0	Aspartic proteinase nepenthesin-1	GO:0004190		-7.50719526479082	3.29619965198663e-06
Cc02_g15480	GSCOC_T00013996001	A0A068TLN4	Cellulose synthase A catalytic subunit 8 [UDP-forming]	GO:0005618;GO:0016021;GO:0005886;GO:0016760;GO:0046872;GO:0071555;GO:0030244;GO:0042742;GO:0050832;GO:0009834;GO:0006970;GO:0009414	AT4G18780	-7.50161991513179	1.40122069469537e-08
Cc02_g27550	GSCOC_T00025086001	A0A068UGS1	DNA-damage-repair/toleration protein DRT100		AT3G12610	-7.47117368888427	0.00162638876633088
Cc02_g21830	GSCOC_T00014831001	A0A068TNE2	Beta-xylosidase/alpha-L-arabinofuranosidase 2	GO:0004553;GO:0005975	AT5G64570	-7.45048725074169	2.80339599424612e-14
Cc08_g08870	GSCOC_T00017222001	A0A068V6J0	Dehydration-responsive protein RD22			-7.42106519602256	0.00130182786022244
Cc06_g03600	GSCOC_T00023646001	A0A068UEW8	Probable beta-1,4-xylosyltransferase IRX9	GO:0000139;GO:0016021;GO:0015018;GO:0042285;GO:0071555;GO:0010417;GO:0009834		-7.41733540098988	1.84963551817069e-07
Cc11_g04520	GSCOC_T00004804001	A0A068V856	Putative Probable LRR receptor-like serine/threonine-protein kinase At4g08850			-7.34322293380405	0.00302776970657569
Cc02_g24560	GSCOC_T00028868001	A0A068UMF2	Putative Metalloendoproteinase 1	GO:0031012;GO:0004222;GO:0008270		-7.3125615963545	0.00597515059486525
Cc05_g10640	GSCOC_T00021414001	A0A068UBX3	Putative unknown protein; FUNCTIONS IN	GO:0016021		-7.19610854900809	3.12065412610915e-05
Cc03_g07330	GSCOC_T00026580001	A0A068TTW0	Salicylate O-methyltransferase	GO:0008168		-7.09882096557544	0.000134888311398457
Cc01_g05920	GSCOC_T00027420001	A0A068UJT1	Protein GAST1		AT1G74670	-7.01308492368623	0.00529851032263426
Cc01_g10800	GSCOC_T00024187001	A0A068UET2	Protein of unknown function, DUF547	GO:0009507		-6.96901460349467	8.48372713812977e-07
Cc03_g14380	GSCOC_T00026648001	A0A068UHN6	Polygalacturonase At1g48100	GO:0005576;GO:0004650;GO:0005975;GO:0071555	AT1G48100	-6.94305320848306	1.24178917003311e-07
Cc07_g17340	GSCOC_T00037443001	A0A068UWK9	Peroxidase 5	GO:0016021;GO:0020037;GO:0046872;GO:0004601;GO:0042744;GO:0006979		-6.86679760209469	0.00765007764605772
Cc00_g00740	GSCOC_T00036186001	A0A068UVV4	NADP-dependent alkenal double bond reductase P1	GO:0016021;GO:0016491		-6.86570202324738	5.40631467469272e-05
Cc10_g10030	GSCOC_T00031465001	A0A068UQZ4	Putative Anthocyanidin 5,3-O-glucosyltransferase	GO:0016021;GO:0008194		-6.81103730863762	1.63360863122798e-08
Cc07_g15430	GSCOC_T00036477001	A0A068TYT5	Epidermis-specific secreted glycoprotein EP1	GO:0048544		-6.80991257878795	0.00687720452937144
Cc06_g01620	GSCOC_T00023390001	A0A068UDD6	Laccase-4	GO:0048046;GO:0005507;GO:0052716;GO:0046274	AT2G38080	-6.79557214985947	6.04902598361168e-09
Cc06_g20360	GSCOC_T00022963001	A0A068UCI3	Bifunctional inhibitor/lipid-transfer protein/seed storage 2S albumin superfamily protein		AT4G12470	-6.73721819003094	4.79849769470643e-10
Cc10_g03280	GSCOC_T00024851001	A0A068UIV3	Putative DNA-3-methyladenine glycosylase 1	GO:0008725;GO:0006284		-6.72842391558708	0.000441260190797724
Cc06_g13430	GSCOC_T00041399001	A0A068U321	Probable xyloglucan endotransglucosylase/hydrolase protein 23	GO:0048046;GO:0005618;GO:0004553;GO:0016762;GO:0071555;GO:0006073		-6.70561696738904	2.22792257081567e-11
Cc02_g27160	GSCOC_T00025036001	A0A068UH00	Vicianin hydrolase (Fragment)	GO:0004553;GO:0005975		-6.69826906863463	0.00332049880066556
Cc02_g37040	GSCOC_T00028044001	A0A068UK45	Putative Subtilisin-like protease	GO:0004252		-6.6839470985299	0.00241193007125313
Cc07_g12970	GSCOC_T00036807001	A0A068U085	TPX2 (targeting protein for Xklp2) protein family	GO:0016021;GO:0005874;GO:0005819;GO:0032147;GO:0060236		-6.66493608788919	0.00134647475311688
Cc05_g13200	GSCOC_T00021094001	A0A068UC92	Probable galacturonosyltransferase 12	GO:0000139;GO:0016021;GO:0047262;GO:0071555;GO:0045489		-6.61693945834776	0.000107992682982687
Cc02_g14590	GSCOC_T00013872001	A0A068TKG8	GDSL esterase/lipase At5g45910	GO:0016788		-6.61417266251652	0.00230857211217176
Cc03_g07230	GSCOC_T00026566001	A0A068TTV1	Probable pectate lyase 15	GO:0016021;GO:0046872;GO:0030570;GO:0045490	AT4G13710	-6.56603272347018	3.26190184509598e-07
Cc00_g05660	GSCOC_T00011950001	A0A068VDV1	Putative amidase C869.01			-6.51688726895242	0.00441165588869096
Cc00_g28540	GSCOC_T00010333001	A0A068VL44	UDP-glucose 6-dehydrogenase	GO:0051287;GO:0003979		-6.44730307629736	0.0058484101734612
Cc08_g12760	GSCOC_T00030435001	A0A068UQP1	Putative Bifunctional inhibitor/lipid-transfer protein/seed storage 2S albumin superfamily protein			-6.44495969271753	7.77215084047661e-07
Cc07_g06260	GSCOC_T00039925001	A0A068U1X5	Protein of unknown function (DUF579)	GO:0016021;GO:0045492	AT5G67210	-6.43769528725658	6.85686019300858e-06
Cc11_g04900	GSCOC_T00042936001	A0A068V449	Putative Pectinesterase 2	GO:0045330;GO:0004857;GO:0030599;GO:0042545;GO:0045490		-6.42129039693258	1.65361186040818e-05
Cc11_g04910	GSCOC_T00042937001	A0A068V3C2	Probable pectinesterase/pectinesterase inhibitor 40	GO:0045330;GO:0004857;GO:0030599;GO:0042545;GO:0045490	AT4G02320	-6.41199492660486	0.000476485659973628
Cc06_g10710	GSCOC_T00041744001	A0A068U4M8	Leucine-rich repeat (LRR) family protein	GO:0016021		-6.36512348906828	0.00575040849328504
Cc02_g38880	GSCOC_T00027797001	A0A068UJW2	GDSL esterase/lipase At4g01130	GO:0016788		-6.31598125727205	0.00974130260065585
Cc05_g07770	GSCOC_T00016779001	A0A068V5D4	NAC domain containing protein 73	GO:0005634;GO:0003677;GO:0006355		-6.31445451638284	0.000468736873070747
Cc09_g03590	GSCOC_T00017527001	A0A068U7U5	Putative ROP-interactive CRIB motif-containing protein 4		AT5G16490	-6.29842153721585	1.49730039587062e-05
Cc06_g14690	GSCOC_T00041223001	A0A068U3T8	Cellulose synthase A catalytic subunit 7 [UDP-forming]	GO:0016021;GO:0005886;GO:0016760;GO:0046872;GO:0071555;GO:0030244	AT5G17420	-6.28917278330982	2.47498034385417e-10
Cc07_g11590	GSCOC_T00036985001	A0A068TZW3	MATE efflux family protein 3, chloroplastic	GO:0016021;GO:0015297;GO:0042910		-6.22357825733649	3.39822924883062e-06
Cc02_g30540	GSCOC_T00023779001	A0A068UF33	Beta-glucosidase 24	GO:0004553;GO:0005975		-6.1962899348603	8.56775553090862e-05
Cc08_g04480	GSCOC_T00015634001	A0A068V4K1	Anthocyanin regulatory C1 protein	GO:0005634;GO:0003677	AT2G16720	-6.16829753639241	1.20749533213796e-05
Cc07_g06320	GSCOC_T00039933001	A0A068U2H8	Hypothetical protein	GO:0016021	AT4G06744	-6.14756667787119	5.3747110802741e-12
Cc09_g09080	GSCOC_T00023109001	A0A068UFC5	Probable purine permease 9	GO:0016021;GO:0015211		-6.11682521068432	4.19402499208148e-05
Cc04_g02380	GSCOC_T00021909001	A0A068TPI1	GDSL esterase/lipase APG	GO:0016788	AT3G16370	-6.09389496140284	4.16700123203015e-06
Cc08_g14880	GSCOC_T00035399001	A0A068UWM4	Cytochrome P450 86A2	GO:0020037;GO:0005506;GO:0004497;GO:0016705	AT4G00360	-6.07864794997851	2.47498034385417e-10
Cc03_g14830	GSCOC_T00026726001	A0A068UHT6	Putative UDP-glycosyltransferase 71C4	GO:0008194	AT1G07260	-6.03729609944993	3.59422087330462e-06
Cc08_g16900	GSCOC_T00035666001	A0A068UUQ0	Putative NAC domain-containing protein 12	GO:0005634;GO:0003677;GO:0006355		-6.03004508526412	0.000218675965796045
Cc08_g11350	GSCOC_T00027136001	A0A068UJD4	Hypothetical protein			-6.00431373772192	2.50636130857774e-05
Cc07_g15160	GSCOC_T00036511001	A0A068U1H4	Putative uncharacterized protein	GO:0016021		-6.00419237995457	1.53771692134535e-07
Cc02_g09150	GSCOC_T00029696001	A0A068TV77	GDSL esterase/lipase At5g33370	GO:0016788		-5.98922730764427	0.00199673736380939
Cc05_g05510	GSCOC_T00035120001	A0A068UW58	Xyloglucan endotransglucosylase/hydrolase protein 9	GO:0048046;GO:0005618;GO:0004553;GO:0016762;GO:0042546;GO:0071555;GO:0010411	AT4G03210	-5.9826193096452	5.47386884034073e-09
Cc06_g12720	GSCOC_T00041501001	A0A068U3E8	Putative GDSL esterase/lipase 5	GO:0016788	AT1G53920	-5.97817899198378	7.93536942108048e-07
Cc02_g25260	GSCOC_T00028772001	A0A068UM84	Cyclin-U4-1	GO:0019901;GO:0000079	AT2G44740	-5.97324871693048	2.9499357097334e-05
Cc10_g04590	GSCOC_T00034917001	A0A068TZ40	Putative Subtilisin-like protease	GO:0004252	AT2G05920	-5.94792031040377	2.39856003630572e-33
Cc07_g07060	GSCOC_T00040040001	A0A068U252	Putative BTB/POZ domain-containing protein At3g49900		AT5G13600	-5.87562562816478	0.00193240138551458
Cc05_g06730	GSCOC_T00042182001	A0A068V293	Putative uncharacterized protein			-5.85930020418192	8.09412667100577e-10
Cc00_g31330	GSCOC_T00004273001	A0A068VMG8	Putative O-acyltransferase (WSD1-like) family protein	GO:0004144		-5.84864981540261	3.297615513068e-10
Cc02_g05420	GSCOC_T00039050001	A0A068UZQ6	Expansin-A4	GO:0005618;GO:0005576;GO:0016020;GO:0009664	AT2G40610	-5.84785144768719	3.8800449320435e-09
Cc10_g01820	GSCOC_T00024670001	A0A068UGJ8	Endoglucanase 24	GO:0016021;GO:0008810;GO:0030245	AT1G19940	-5.84057046626385	1.76852920978953e-14
Cc04_g10740	GSCOC_T00042644001	A0A068V348	Probable pectate lyase 22	GO:0046872;GO:0030570;GO:0045490	AT5G63180	-5.83470213645713	3.04505753822266e-06
Cc08_g04660	GSCOC_T00004723001	A0A068VHH1	Putative Cytosolic sulfotransferase 15	GO:0008146	AT5G07010	-5.81625159440692	2.30613094872608e-20
Cc04_g03500	GSCOC_T00022045001	A0A068TQ72	Probable sulfate transporter 3.4	GO:0016021;GO:0005886;GO:0009506;GO:0008271;GO:0006817		-5.81146136773589	0.00694403839869432
Cc06_g13860	GSCOC_T00041337001	A0A068U3L2	Putative unknown protein; FUNCTIONS IN	GO:0016021		-5.78870378627549	0.00059011664389565
Cc05_g02480	GSCOC_T00020948001	A0A068UB14	GDSL esterase/lipase At2g42990	GO:0016021;GO:0016788	AT2G42990	-5.71237069768436	8.63176036960886e-05
Cc09_g01610	GSCOC_T00017786001	A0A068U7X4	Predicted protein			-5.70225879551186	1.64904375941594e-05
Cc04_g06890	GSCOC_T00022490001	A0A068TST2	Probable non-specific lipid-transfer protein AKCS9	GO:0006869		-5.69302786716048	0.000257943981034607
Cc04_g11360	GSCOC_T00037307001	A0A068UYM9	High-affinity nitrate transporter 3.1	GO:0016021;GO:0005886;GO:0042128;GO:0015706;GO:0010167		-5.6314717458744	7.34719473241234e-06
Cc11_g09530	GSCOC_T00032706001	A0A068TWU9	Putative Zinc finger CCCH domain-containing protein 15	GO:0046872		-5.59986705746805	0.0058484101734612
Cc10_g00910	GSCOC_T00024551001	A0A068UFT0	L-ascorbate oxidase homolog	GO:0005507;GO:0016491	AT4G12420	-5.58652988012775	1.46272620817215e-09
Cc02_g19900	GSCOC_T00014569001	A0A068TM56	Pollen-specific protein SF3	GO:0046872	AT1G10200	-5.53591531489139	0.000252868756593463
Cc07_g03490	GSCOC_T00039583001	A0A068U265	Expansin-A15	GO:0005618;GO:0005576;GO:0016020;GO:0009664	AT2G03090	-5.51404510566027	0.000233862104295733
Cc00_g22470	GSCOC_T00009593001	A0A068VJX4	COBRA-like protein 4	GO:0031225;GO:0016021;GO:0010215		-5.51005121234054	1.24648047962917e-06
Cc03_g14880	GSCOC_T00026734001	A0A068UHT9	Putative disease resistance protein RGA4	GO:0008194	AT5G03490	-5.48270334699443	1.71495746051239e-05
Cc01_g08580	GSCOC_T00023887001	A0A068UGU2	Late embryogenesis abundant (LEA) hydroxyproline-rich glycoprotein family	GO:0016021	AT3G11660	-5.48041599628005	3.69382235339258e-09
Cc02_g36510	GSCOC_T00003915001	A0A068VB37	Fasciclin-like arabinogalactan protein 8	GO:0016021	AT2G45470	-5.44165922672821	5.09951969119045e-10
Cc03_g09190	GSCOC_T00042703001	A0A068V5H0	Probable xyloglucan endotransglucosylase/hydrolase protein 16	GO:0048046;GO:0005618;GO:0004553;GO:0016762;GO:0071555;GO:0006073	AT3G23730	-5.43340609922041	2.30277900695429e-21
Cc00_g00330	GSCOC_T00036114001	A0A068UVC8	Flavin-containing monooxygenase FMO GS-OX-like 3	GO:0050660;GO:0004499;GO:0050661		-5.41045334407751	0.00668965259686152
Cc08_g11830	GSCOC_T00012608001	A0A068VIE4	Putative unknown protein; FUNCTIONS IN			-5.40401748911939	0.000406939402674729
Cc02_g36000	GSCOC_T00042762001	A0A068V3N3	Putative myb domain protein 61	GO:0005634;GO:0003677		-5.35542342110982	0.000247945258033156
Cc01_g10430	GSCOC_T00024139001	A0A068UHC4	Serine carboxypeptidase-like 48	GO:0004185		-5.33006734781394	0.00121168824005177
Cc10_g05460	GSCOC_T00034803001	A0A068TY72	Snakin-1			-5.32470567115089	1.10913199458746e-06
Cc01_g03970	GSCOC_T00040873001	A0A068V0V9	Isoflavone reductase homolog P3			-5.28748290967241	2.72049702357576e-07
Cc10_g06840	GSCOC_T00034605001	A0A068TYG6	Phosphate-responsive 1 family protein		AT4G08950	-5.18347216391161	0.00886726754736006
Cc00_g08090	GSCOC_T00006943001	A0A068VEK5	Putative Deacetylvindoline O-acetyltransferase	GO:0016747		-5.1653874923395	8.94691787111706e-15
Cc02_g27300	GSCOC_T00025057001	A0A068UGQ4	Putative DUF246 domain-containing protein At1g04910	GO:0016021;GO:0016757;GO:0006004		-5.12645185664103	1.65643363444999e-08
Cc00_g00940	GSCOC_T00041151001	A0A068V3Z9	Peroxidase 47	GO:0005576;GO:0016021;GO:0020037;GO:0046872;GO:0004601;GO:0042744;GO:0006979		-5.08676590751866	0.00332049880066556
Cc05_g15490	GSCOC_T00038686001	A0A068UZE5	Predicted protein	GO:0016021		-5.08126095252521	0.000124763134947093
Cc01_g13560	GSCOC_T00028326001	A0A068ULL6	Putative Copper transporter 6	GO:0016021;GO:0005375;GO:0006878		-5.07549966817746	1.31750686837997e-08
Cc10_g03370	GSCOC_T00024861001	A0A068UH22	Pathogenesis-related protein 5			-5.0720122422239	0.00254641635354794
Cc00_g07310	GSCOC_T00000204001	A0A068VEL8	Somatic embryogenesis receptor kinase 1			-5.0383176311019	0.0080373069096042
Cc03_g02370	GSCOC_T00025879001	A0A068TU90	Hypothetical protein			-5.03600833500211	5.32950574787649e-05
Cc07_g10690	GSCOC_T00037085001	A0A068U048	Putative WEB family protein At2g17940			-5.02213366618945	0.000449607490068374
Cc10_g07490	GSCOC_T00034515001	A0A068TY76	Probable beta-D-xylosidase 7	GO:0004553;GO:0005975	AT1G78060	-5.00909195732981	0.000362299168461805
Cc01_g01200	GSCOC_T00037968001	A0A068UX72	Putative Disease resistance response protein 206	GO:0048046	AT1G58170	-4.99879588059553	0.00271860330117681
Cc02_g33140	GSCOC_T00015328001	A0A068V492	Probable xyloglucan endotransglucosylase/hydrolase 1	GO:0048046;GO:0005618;GO:0004553;GO:0016762;GO:0042546;GO:0071555;GO:0010411	AT2G06850	-4.97420963234842	0.000514289212074122
Cc08_g12770	GSCOC_T00030433001	A0A068UNN7	14 kDa proline-rich protein DC2.15		AT4G12480	-4.89064042180297	0.000184259808997311
Cc04_g01380	GSCOC_T00021788001	A0A068TP95	Putative myb domain protein 7	GO:0005634;GO:0003677	AT1G22640	-4.88962554031715	0.00459897346294081
Cc05_g02500	GSCOC_T00020945001	A0A068UDN1	GDSL esterase/lipase At2g04570	GO:0016788	AT2G04570	-4.88709679772501	1.76173112659099e-06
Cc01_g08480	GSCOC_T00006217001	A0A068VJI6	Putative Aspartic proteinase nepenthesin-1	GO:0004190		-4.88464438175849	2.80013757482632e-05
Cc07_g06280	GSCOC_T00039927001	A0A068U4I3	Putative Uncharacterized protein At4g06744		AT4G06744	-4.87448999407755	2.51600777724304e-14
Cc00_g13610	GSCOC_T00011114001	A0A068VH35	Anthocyanidin reductase	GO:0003824	AT1G61720	-4.87359923185672	2.2087963241685e-05
Cc10_g04340	GSCOC_T00034946001	A0A068TZ57	Putative unknown protein; Has 26 Blast hits to 26 proteins in 10 species			-4.86610800175497	0.000930603937354007
Cc10_g09820	GSCOC_T00031496001	A0A068USY6	Germin-like protein subfamily 1 member 14	GO:0048046;GO:0005618;GO:0030145;GO:0045735	AT5G39110	-4.86221850403567	8.17953791817501e-15
Cc00_g16700	GSCOC_T00010544001	A0A068VKQ7	Putative Foot protein 1 variant 1			-4.80556034354427	0.000184176353976945
Cc03_g09650	GSCOC_T00030951001	A0A068UP31	Auxin-responsive family protein	GO:0016021;GO:0046872;GO:0055114		-4.79253943093881	0.00140677532605178
Cc06_g12260	GSCOC_T00041559001	A0A068U429	Predicted protein			-4.78089463668421	3.51073998397254e-05
Cc00_g17860	GSCOC_T00008903001	A0A068VI29	Probable polygalacturonase	GO:0004650;GO:0005975		-4.76758070026005	1.9793255529655e-06
Cc07_g07560	GSCOC_T00040106001	A0A068U2B1	Probable xyloglucan endotransglucosylase/hydrolase protein 6	GO:0048046;GO:0005618;GO:0016021;GO:0004553;GO:0016762;GO:0042546;GO:0071555;GO:0009414;GO:0010411	AT5G65730	-4.75162105714624	6.02722498684791e-10
Cc05_g02420	GSCOC_T00020978001	A0A068UB96	Fasciclin-like arabinogalactan protein 7	GO:0046658	AT2G04780	-4.72556575806806	9.55444890425993e-06
Cc00_g13740	GSCOC_T00013297001	A0A068VGT5	Probable pectinesterase/pectinesterase inhibitor 12	GO:0045330;GO:0004857;GO:0030599;GO:0042545;GO:0045490;GO:0009617		-4.72109005698085	0.000152640555015026
Cc04_g06340	GSCOC_T00022420001	A0A068TSM5	Thaumatin-like protein		AT1G75040	-4.71880628211676	0.00025093222747828
Cc06_g04770	GSCOC_T00043000001	A0A068V3F5	Putative PLATZ transcription factor family protein			-4.70643015682129	0.00157093794873186
Cc00_g23340	GSCOC_T00012065001	A0A068VJU3	Putative O-acyltransferase (WSD1-like) family protein	GO:0004144;GO:0045017		-4.6929050773648	0.00457097365351909
Cc04_g03930	GSCOC_T00022109001	A0A068TQ17	Cytochrome P450 734A1	GO:0016021;GO:0020037;GO:0005506;GO:0004497;GO:0016705		-4.68908929307036	0.00245701867037862
Cc07_g03350	GSCOC_T00039562001	A0A068U129	Myb-related protein 306	GO:0005634;GO:0003677;GO:0009626;GO:0009617;GO:0001666;GO:0042761		-4.65620841267131	1.63284339748289e-07
Cc02_g06950	GSCOC_T00039249001	A0A068V0M5	Laccase-4	GO:0048046;GO:0005507;GO:0052716;GO:0046274	AT2G38080	-4.64466604730438	0.00013147835294517
Cc04_g00690	GSCOC_T00021692001	A0A068TR01	Pectinesterase 3	GO:0005618;GO:0005576;GO:0016021;GO:0045330;GO:0004857;GO:0030599;GO:0042545;GO:0045490		-4.63997120862707	0.000244848264701095
Cc04_g09270	GSCOC_T00022810001	A0A068TQX4	Purple acid phosphatase 17	GO:0003993;GO:0046872;GO:0030643;GO:0042542		-4.61297582388778	3.67633601119311e-14
Cc07_g06680	GSCOC_T00039985001	A0A068U4M6	Arabinogalactan			-4.60966528456547	8.34133342971917e-16
Cc07_g13350	GSCOC_T00036754001	A0A068U0E6	Probable inactive receptor kinase At1g48480	GO:0016021;GO:0005524;GO:0004672	AT5G16590	-4.60177086466002	0.00139433184296352
Cc04_g14350	GSCOC_T00004340001	A0A068VBU8	Putative unknown protein; BEST Arabidopsis thaliana protein match is	GO:0016021		-4.58674772097658	0.00352831876961664
Cc00_g05460	GSCOC_T00000304001	A0A068VDS7	Pathogenesis-related protein 5			-4.57198434579476	4.92960974432463e-07
Cc06_g00570	GSCOC_T00023239001	A0A068UD44	Cationic peroxidase 1	GO:0020037;GO:0046872;GO:0004601;GO:0042744;GO:0006979	AT1G14550	-4.57004608756919	9.29512336327468e-05
Cc07_g09010	GSCOC_T00040294001	A0A068U2S7	Putative unknown protein; BEST Arabidopsis thaliana protein match is			-4.56950990614831	0.00023654955707743
Cc08_g07850	GSCOC_T00011880001	A0A068VDW9	Putative Probable WRKY transcription factor 40	GO:0005634;GO:0003700;GO:0043565		-4.55024566318612	1.60435078029427e-06
Cc01_g00050	GSCOC_T00012435001	A0A068VFX6	arabinogalactan protein 14	GO:0016021		-4.54379401680251	1.92257667510699e-05
Cc02_g15730	GSCOC_T00014032001	A0A068TLQ9	unknown protein; FUNCTIONS IN			-4.52073658004884	0.00175491450866488
Cc06_g16470	GSCOC_T00030688001	A0A068UNH5	Probably inactive leucine-rich repeat receptor-like protein kinase At5g06940	GO:0016021;GO:0005524;GO:0004672	AT5G06940	-4.49373981212385	0.000518044111265289
Cc07_g00610	GSCOC_T00019139001	A0A068V9R8	Putative Ankyrin-2			-4.48997441874362	0.00104645185876324
Cc02_g14560	GSCOC_T00013869001	A0A068TLB6	Putative GDSL esterase/lipase At1g28590	GO:0016788	AT1G28590	-4.47876584850634	3.79924555913067e-05
Cc05_g00350	GSCOC_T00017064001	A0A068V6A5	Putative Acidic endochitinase			-4.45704098390332	0.000108967039292673
Cc07_g07000	GSCOC_T00040033001	A0A068U225	BTB/POZ and TAZ domain-containing protein 4	GO:0042025;GO:0004402;GO:0003712;GO:0008270;GO:0006355		-4.44457789516383	0.000122085616248593
Cc01_g16990	GSCOC_T00016376001	A0A068U6E2	Probable LRR receptor-like serine/threonine-protein kinase At5g48740	GO:0016021;GO:0005524;GO:0004672	AT5G48740	-4.4413397780114	0.000183989570836227
Cc08_g02950	GSCOC_T00037797001	A0A068UXQ6	Putative Transcription factor bHLH94	GO:0046983	AT1G72210	-4.41325303064911	1.34745567365089e-06
Cc11_g14360	GSCOC_T00032067001	A0A068TY03	Putative Serine/threonine-protein kinase PBS1	GO:0005524;GO:0004674		-4.40794426669583	0.000214719189355387
Cc02_g11960	GSCOC_T00029352001	A0A068TTZ3	Flavoprotein WrbA	GO:0010181;GO:0003955		-4.39299627724953	0.000180242976789156
Cc00_g24100	GSCOC_T00001080001	A0A068VK34	GDSL esterase/lipase At1g28580	GO:0016788		-4.38393064476423	7.09194288856522e-07
Cc02_g26690	GSCOC_T00024970001	A0A068UHG8	Protein of Unknown Function (DUF239)			-4.37421310194123	5.30169939334209e-09
Cc02_g04140	GSCOC_T00020317001	A0A068U9U7	Putative 21 kDa protein	GO:0004857		-4.37240690521011	0.000529876631268015
Cc10_g14500	GSCOC_T00033583001	A0A068USF9	Hypothetical protein	GO:0016021		-4.35165696888059	0.000576308372205763
Cc00_g12370	GSCOC_T00013520001	A0A068VGU3	Putative uncharacterized protein	GO:0010112		-4.34854330801822	8.03394180381248e-05
Cc03_g01760	GSCOC_T00025801001	A0A068TS39	unknown protein; Has 91 Blast hits to 91 proteins in 12 species	GO:0016021		-4.34747099753479	2.66599902254865e-05
Cc08_g12940	GSCOC_T00030408001	A0A068UN00	Monocopper oxidase-like protein SKU5	GO:0046658;GO:0048046;GO:0009505;GO:0009506;GO:0005774;GO:0005507;GO:0016491;GO:0009932	AT4G12420	-4.3455357154908	0.00169970602052399
Cc11_g12830	GSCOC_T00032263001	A0A068TVS4	Expansin-A1	GO:0005618;GO:0005576;GO:0016021;GO:0009664	AT2G03090	-4.33399810959497	8.06380963470409e-05
Cc10_g05940	GSCOC_T00034734001	A0A068TYU9	Hypothetical protein			-4.32462963285028	0.00357089002300906
Cc02_g16790	GSCOC_T00014174001	A0A068TKX6	Auxin-induced protein 15A	GO:0009733	AT4G34760	-4.31065404712616	0.00392704349989016
Cc09_g05370	GSCOC_T00007119001	A0A068VCG0	Polygalacturonase QRT3	GO:0004650		-4.30410612838717	0.00184321940145887
Cc08_g06540	GSCOC_T00036047001	A0A068UV83	Probable xyloglucan glycosyltransferase 5	GO:0016021	AT4G31590	-4.28739847584161	9.55444890425993e-06
Cc01_g10180	GSCOC_T00024100001	A0A068UH96	Hypothetical protein	GO:0016021		-4.26737964102572	0.000180040643082192
Cc06_g06900	GSCOC_T00031327001	A0A068UQ54	Fasciclin-like arabinogalactan protein 17		AT5G06390	-4.26563219398572	1.72472523910307e-32
Cc07_g00460	GSCOC_T00019117001	A0A068V9M9	Glyceraldehyde-3-phosphate dehydrogenase, cytosolic	GO:0051287;GO:0050661;GO:0016620;GO:0006006		-4.26127126401013	0.00157575912486841
Cc06_g12080	GSCOC_T00041578001	A0A068U3G1	Auxin-binding protein ABP20	GO:0048046;GO:0005618;GO:0030145;GO:0045735	AT5G20630	-4.25219970206896	9.60231946106192e-05
Cc02_g29530	GSCOC_T00018389001	A0A068V7D0	Putative 21 kDa seed protein	GO:0004866	AT1G17860	-4.24628600903308	0.00028991273503667
Cc03_g14190	GSCOC_T00031813001	A0A068UR09	Basic endochitinase	GO:0004553;GO:0005975	AT5G24090	-4.24501076854236	1.96987262690492e-05
Cc04_g09640	GSCOC_T00008123001	A0A068VIW8	Protein ASPARTIC PROTEASE IN GUARD CELL 1	GO:0004190;GO:0009737;GO:0009414	AT3G18490	-4.24457794550253	3.57632194617093e-22
Cc07_g02210	GSCOC_T00039404001	A0A068U0S2	Tetratricopeptide repeat (TPR)-like superfamily protein			-4.2431638739209	0.00166799287025621
Cc05_g14940	GSCOC_T00038756001	A0A068UZL1	Fasciclin-like arabinogalactan protein 1	GO:0046658;GO:0005618;GO:0048364;GO:0048367	AT5G55730	-4.20953184915503	1.4046261040432e-10
Cc11_g00410	GSCOC_T00019481001	A0A068VB43	Putative Acidic endochitinase			-4.18638118472253	9.91490169832835e-07
Cc07_g08550	GSCOC_T00040232001	A0A068U2I6	Probable non-specific lipid-transfer protein AKCS9	GO:0006869		-4.16484401912642	0.000472601757696866
Cc00_g03770	GSCOC_T00002032001	A0A068VBK7	AAA-ATPase 1	GO:0016021;GO:0005524	AT5G40010	-4.1547678932104	0.000887999341747307
Cc07_g12480	GSCOC_T00036867001	A0A068TZS1	Probable acyl-activating enzyme 6	GO:0003824	AT5G16340	-4.13700739304823	5.47386884034073e-09
Cc11_g01090	GSCOC_T00019641001	A0A068U8J3	Protein ASPARTIC PROTEASE IN GUARD CELL 2	GO:0016021;GO:0004190		-4.1150808257552	0.00363056915200287
Cc07_g10950	GSCOC_T00037055001	A0A068U121	Putative Lysosomal alpha-mannosidase	GO:0004559;GO:0030246;GO:0046872;GO:0006013	AT5G66150	-4.10751800910514	7.9353274675434e-05
Cc06_g18240	GSCOC_T00040431001	A0A068V133	Glucan endo-1,3-beta-glucosidase, acidic isoform PR-Q'	GO:0004553;GO:0005975	AT4G16260	-4.09868290536782	7.93536942108048e-07
Cc07_g14930	GSCOC_T00036551001	A0A068TYY5	UDP-glycosyltransferase 85A1	GO:0008194		-4.09820660801077	9.26364532245327e-06
Cc03_g03710	GSCOC_T00026070001	A0A068TSM9	Putative uncharacterized protein			-4.09405015504178	0.0088311500836158
Cc10_g02560	GSCOC_T00024760001	A0A068UG71	Jasmonate O-methyltransferase	GO:0030795;GO:0009694;GO:0009611	AT1G19640	-4.09025873703574	3.90142618185137e-11
Cc01_g12960	GSCOC_T00028253001	A0A068ULE9	Expansin-A4	GO:0005618;GO:0005576;GO:0016020;GO:0009664	AT2G39700	-4.08535547453995	2.77873713328627e-05
Cc11_g02530	GSCOC_T00018513001	A0A068V761	Acidic endochitinase	GO:0004553;GO:0005975	AT5G24090	-4.07849448386516	1.41902719321523e-05
Cc11_g00210	GSCOC_T00019446001	A0A068VB23	BTB/POZ domain-containing protein At3g19850		AT3G19850	-4.05579000843322	0.000422416254911779
Cc05_g16580	GSCOC_T00038542001	A0A068V0X8	Protein of unknown function (DUF620)			-4.04344270137281	0.000452090431901434
Cc08_g00740	GSCOC_T00038473001	A0A068UZ34	Ethylene-responsive transcription factor SHINE 3	GO:0005634;GO:0003677;GO:0003700	AT5G25390	-4.02462086433954	9.11977714216022e-06
Cc05_g10800	GSCOC_T00021396001	A0A068UCX5	TRICHOME BIREFRINGENCE-LIKE 41			-4.02065310508106	0.00814381385234085
Cc10_g04890	GSCOC_T00034880001	A0A068TZ21	Putative Cyclin-D3-2	GO:0042025	AT4G34160	-4.01750723143532	0.00189883945647193
Cc06_g03690	GSCOC_T00023658001	A0A068UGI6	Putative Predicted protein			-4.01040852311011	0.000767747582086606
Cc08_g02440	GSCOC_T00037718001	A0A068UZB9	NAC domain containing protein 71	GO:0005634;GO:0003677;GO:0006355	AT4G17980	-3.99068457308303	0.00294699450996394
Cc04_g04400	GSCOC_T00022164001	A0A068TQG4	phosphatidic acid phosphatase-related / PAP2-related	GO:0016021		-3.97563175625274	1.70892691418212e-07
Cc00_g14150	GSCOC_T00009209001	A0A068VJX3	Protein COBRA	GO:0031225;GO:0010215	AT5G60920	-3.95659550108361	1.80489114530604e-09
Cc02_g00760	GSCOC_T00019870001	A0A084R1I1	Caffeic acid 3-O-methyltransferase	GO:0005737;GO:0005634;GO:0005886;GO:0009506;GO:0017096;GO:0047763;GO:0030744;GO:0033799;GO:0046983;GO:0030755;GO:0051555;GO:0009809;GO:0030187;GO:0032259		-3.9415888752873	5.26560361969667e-09
Cc07_g11550	GSCOC_T00036989001	A0A068U0X4	Basic endochitinase A	GO:0008061;GO:0004568;GO:0005975;GO:0016998;GO:0006032		-3.93455501668251	4.92960974432463e-07
Cc07_g04970	GSCOC_T00039758001	A0A068U240	Putative NAD(P)-binding Rossmann-fold superfamily protein	GO:0003854;GO:0006694		-3.93301841134335	0.00502615945904679
Cc02_g11660	GSCOC_T00029384001	A0A068TU18	Probable xyloglucan endotransglucosylase/hydrolase protein 8	GO:0048046;GO:0005618;GO:0004553;GO:0016762;GO:0042546;GO:0071555;GO:0010411	AT1G11545	-3.92582593714694	6.25786106277853e-13
Cc06_g09480	GSCOC_T00041909001	A0A068U480	Predicted protein (Fragment)		AT3G24480	-3.9238557315119	5.81809364737591e-14
Cc09_g10530	GSCOC_T00041034001	A0A068V146	Expansin-like A1	GO:0005576		-3.92263943074271	0.00277937637854792
Cc02_g15520	GSCOC_T00014003001	A0A068TNA8	Hypothetical protein	GO:0016021;GO:0003677	AT5G35550	-3.92071747553802	0.000233862104295733
Cc08_g16000	GSCOC_T00035548001	A0A068UUD4	Endoglucanase 6	GO:0030246;GO:0008810;GO:0030245;GO:0030246;GO:0008810;GO:0030245	AT1G64390	-3.89032137301496	1.97085552350902e-07
Cc01_g14620	GSCOC_T00028468001	A0A068UL44	Putative Probable LRR receptor-like serine/threonine-protein kinase MRH1	GO:0016021;GO:0005524;GO:0004672		-3.88362704284995	0.00457097365351909
Cc07_g06870	GSCOC_T00040013001	A0A068U2Q0	Peroxidase 73	GO:0005576;GO:0020037;GO:0046872;GO:0004601;GO:0042744;GO:0006979	AT5G67400	-3.87503733275121	5.13443599401e-11
Cc07_g09810	GSCOC_T00037195001	A0A068U304	Dihydroflavonol-4-reductase	GO:0003824	AT5G42800	-3.86066808477036	0.000124763134947093
Cc00_g32030	GSCOC_T00008801001	A0A068VQ62	Chalcone and stilbene synthase family protein	GO:0016747;GO:0009058	AT5G13930	-3.86041000499141	7.61808651934044e-05
Cc04_g07350	GSCOC_T00022548001	A0A068TR73	Putative Protein ASPARTIC PROTEASE IN GUARD CELL 1	GO:0004190;GO:0009737;GO:0009414	AT3G18490	-3.85772943378766	1.07256318088061e-13
Cc09_g00150	GSCOC_T00017985001	A0A068UAA4	Hypothetical protein			-3.80353312812522	0.00656863955796411
Cc01_g16330	GSCOC_T00016455001	A0A068U8K5	Putative Auxin-induced in root cultures protein 12	GO:0016021	AT3G25290	-3.78546792588865	0.00128355160875832
Cc03_g01550	GSCOC_T00025770001	A0A068TRH6	unknown protein; BEST Arabidopsis thaliana protein match is			-3.77355185811656	7.8887634032763e-05
Cc07_g06750	GSCOC_T00039999001	A0A068U202	Subtilisin-like protease	GO:0004252	AT5G67360	-3.76828784325447	3.22762344547227e-16
Cc07_g17530	GSCOC_T00008836001	A0A068VJR3	Probable cinnamyl alcohol dehydrogenase 9	GO:0016491;GO:0008270		-3.75647822449289	0.00085194760637611
Cc00_g35780	GSCOC_T00008950001	A0A068VRA9	Germin-like protein subfamily 1 member 7	GO:0048046;GO:0005618;GO:0030145;GO:0045735		-3.71759316806327	9.15770370399924e-05
Cc03_g03340	GSCOC_T00026018001	A0A068TRS1	Uncharacterized GPI-anchored protein At3g06035			-3.71678195165662	0.00272755924725537
Cc02_g17620	GSCOC_T00014282001	A0A068TNW7	Glucan endo-1,3-beta-glucosidase 7	GO:0004553;GO:0005975	AT4G34480	-3.69734135450394	3.39822924883062e-06
Cc02_g09600	GSCOC_T00029636001	A0A068TV37	Putative FUNCTIONS IN			-3.68534274386774	0.00734234612538007
Cc01_g13200	GSCOC_T00028283001	A0A068UN89	Zinc transporter 1	GO:0016021;GO:0046873		-3.68394347246615	5.73623347594469e-08
Cc02_g13480	GSCOC_T00029145001	A0A068TU88	Putative arabinogalactan protein 30		AT2G33790	-3.68049601404765	4.9792582764756e-06
Cc00_g10910	GSCOC_T00001639001	A0A068VG60	Oligopeptide transporter 4	GO:0016021;GO:0055085		-3.66607719627128	2.63892842084165e-08
Cc10_g14530	GSCOC_T00033590001	A0A068USZ1	Putative uncharacterized protein	GO:0005199;GO:0009664		-3.64554988137184	0.00363056915200287
Cc07_g10740	GSCOC_T00037080001	A0A068U043	Naringenin,2-oxoglutarate 3-dioxygenase (Fragment)	GO:0046872;GO:0016491	AT3G51240	-3.64262244233215	0.000882970694979805
Cc01_g07620	GSCOC_T00009374001	A0A068VEG8	Hypothetical protein	GO:0016021	AT2G13820	-3.63843950777082	0.00677419767159333
Cc11_g00400	GSCOC_T00019478001	A0A068V8L2	Putative Acidic endochitinase			-3.6337128306708	3.33739503776689e-06
Cc00_g14020	GSCOC_T00010024001	A0A068VH99	3-ketoacyl-CoA synthase 21	GO:0016021;GO:0016747;GO:0006633	AT5G04530	-3.62113272175466	6.86712274220712e-11
Cc01_g16120	GSCOC_T00016479001	A0A068U6Z9	Fimbrin-like protein 2	GO:0051015;GO:0051017	AT5G48460	-3.61865498547565	0.00315822100307156
Cc10_g13450	GSCOC_T00035291001	A0A068UU52	unknown protein; BEST Arabidopsis thaliana protein match is			-3.6166072185869	0.00029546916726842
Cc00_g12190	GSCOC_T00012517001	A0A068VGC7	Elicitor-responsive protein 3		AT1G63220	-3.60569252505547	0.000818990919502797
Cc01_g12260	GSCOC_T00028156001	A0A068UL69	Aquaporin TIP1-1	GO:0016021;GO:0015267	AT2G36830	-3.60300958986438	4.36048194716965e-09
Cc10_g04500	GSCOC_T00034926001	A0A068TYJ8	Putative Remorin family protein			-3.59239605165125	0.00184843121433682
Cc06_g14390	GSCOC_T00041262001	A0A068U3W3	Putative Bifunctional dihydroflavonol 4-reductase/flavanone 4-reductase			-3.59235604493974	0.00299365330061071
Cc09_g09550	GSCOC_T00004074001	A0A068V992	Putative uncharacterized protein			-3.59204379681874	0.00956511480344753
Cc01_g17230	GSCOC_T00016350001	A0A068U8B5	Tetratricopeptide repeat (TPR)-like superfamily protein	GO:0010438;GO:0010439;GO:0006792	AT5G48850	-3.59100991311582	0.00766124313928541
Cc02_g19160	GSCOC_T00014480001	A0A068TML4	Putative Polygalacturonase inhibitor 1		AT2G23950	-3.59063305348982	2.4696393074985e-17
Cc02_g09710	GSCOC_T00029619001	A0A068TUI1	TRICHOME BIREFRINGENCE-LIKE 36		AT3G54260	-3.58381837251018	0.00347350685410909
Cc02_g11550	GSCOC_T00029398001	A0A068TUN9	Tryptophan synthase beta chain 2, chloroplastic	GO:0004834	AT4G27070	-3.56134360837174	0.00460369577011584
Cc04_g11100	GSCOC_T00037271001	A0A068UWP8	Probable galactinol--sucrose galactosyltransferase 2	GO:0003824		-3.54908901386336	0.00265767166336151
Cc01_g15110	GSCOC_T00016604001	A0A068U682	Peroxidase 4	GO:0005576;GO:0020037;GO:0046872;GO:0004601;GO:0042744;GO:0006979		-3.54579708451916	0.00845645081922489
Cc11_g10580	GSCOC_T00032559001	A0A068TWE1	Probable galacturonosyltransferase-like 3	GO:0016757	AT1G13250	-3.54130191748296	5.3747110802741e-12
Cc07_g01090	GSCOC_T00019194001	A0A068V7X4	Putative Glycerophosphodiester phosphodiesterase gde1	GO:0008081;GO:0006629		-3.5395651975402	2.21748740527653e-30
Cc02_g01620	GSCOC_T00019989001	A0A068UBP8	Probable pectinesterase/pectinesterase inhibitor 34	GO:0016021;GO:0045330;GO:0004857;GO:0030599;GO:0042545;GO:0045490	AT3G49220	-3.53330625204029	2.24290322221982e-16
Cc06_g12500	GSCOC_T00041530001	A0A068U610	Putative Protein TIFY 10A		AT1G19180	-3.5215557482833	0.00424340090004269
Cc08_g08820	GSCOC_T00017214001	A0A068V6I5	Putative BURP domain-containing protein 5		AT5G25610	-3.52032791773948	5.51289931913364e-18
Cc08_g13720	GSCOC_T00030311001	A0A068UNF8	Leucoanthocyanidin dioxygenase	GO:0046872;GO:0016491		-3.51341972957508	0.00317875076069192
Cc01_g21160	GSCOC_T00005016001	A0A068V961	Kinesin-4	GO:0005524;GO:0008017;GO:0003777;GO:0007018	AT2G47500	-3.51181886493256	0.00169970602052399
Cc04_g07360	GSCOC_T00022550001	A0A068TQ54	Putative Protein ASPARTIC PROTEASE IN GUARD CELL 1	GO:0004190;GO:0009737;GO:0009414	AT3G18490	-3.47952457006293	6.47049480971625e-10
Cc02_g14990	GSCOC_T00013928001	A0A068TKJ0	Non-specific lipid-transfer protein	GO:0008289;GO:0006869	AT5G59320	-3.45171610956453	5.12493779218721e-05
Cc10_g01720	GSCOC_T00024658001	A0A068UGI9	Hexokinase-2, chloroplastic	GO:0005524;GO:0005536;GO:0004396;GO:0001678;GO:0006096		-3.45066074427681	0.000307393176548851
Cc09_g04820	GSCOC_T00017376001	A0A068U6F1	Apyrase	GO:0016787		-3.44984336637656	0.000247945258033156
Cc02_g32420	GSCOC_T00001250001	A0A068VBP2	Histidine-containing phosphotransfer protein 1	GO:0000160	AT3G21510	-3.4449519851584	0.00536484835314631
Cc06_g03900	GSCOC_T00023688001	A0A068UEY9	Aquaporin PIP2-2	GO:0016021;GO:0015267	AT2G37170	-3.42718388454543	0.00374396085839696
Cc09_g08980	GSCOC_T00023128001	A0A068UFD3	Putative ferredoxin-related			-3.42572022452344	3.76673955400601e-05
Cc02_g28330	GSCOC_T00025208001	A0A068UJL5	Protein of unknown function, DUF642			-3.42172423210185	0.00153276778316038
Cc11_g02980	GSCOC_T00025493001	A0A068UHB1	Interactor of constitutive active ROPs 2, chloroplastic		AT2G37080	-3.41377548501143	0.00164422327200671
Cc06_g22070	GSCOC_T00017141001	A0A068V616	Cytochrome P450 83B1	GO:0020037;GO:0005506;GO:0004497;GO:0016705		-3.39288640303347	0.00284639075087302
Cc04_g02760	GSCOC_T00021957001	A0A068TNT2	Ethylene-responsive transcription factor TINY	GO:0005634;GO:0003677;GO:0003700		-3.39113271294111	9.08003936010912e-07
Cc02_g05390	GSCOC_T00039046001	A0A068V1Y7	Putative Chalcone--flavonone isomerase	GO:0016872	AT5G05270	-3.37231913102343	3.96764338648467e-05
Cc00_g19230	GSCOC_T00011837001	A0A068VIJ4	Putative Early nodulin-like protein 2	GO:0009055		-3.37136544595187	0.000943121182998545
Cc07_g04510	GSCOC_T00039707001	A0A068U1G0	Hypothetical protein			-3.37009505474861	2.77805741449855e-09
Cc10_g14430	GSCOC_T00006176001	A0A068VFY4	Cupredoxin superfamily protein			-3.36000762711217	0.000748615344886399
Cc08_g04630	GSCOC_T00015666001	A0A068V4M7	Pectinacetylesterase family protein	GO:0005618;GO:0005576;GO:0016787;GO:0071555	AT4G19420	-3.34856244585537	1.45981377641622e-08
Cc02_g36020	GSCOC_T00042760001	A0A068V2Z8	Putative Probable peptide/nitrate transporter At1g59740	GO:0016021;GO:0022857	AT1G59740	-3.34690693362017	0.00408569332998511
Cc02_g16640	GSCOC_T00014157001	A0A068TKW3	Putative Aquaporin PIP-type	GO:0016021;GO:0015267		-3.3349001628656	1.50568818309265e-05
Cc04_g05320	GSCOC_T00022281001	A0A068TPV3	Putative Protein ASPARTIC PROTEASE IN GUARD CELL 2	GO:0004190	AT5G10770	-3.31354117158262	0.00209205927380652
Cc04_g05670	GSCOC_T00022331001	A0A068TPX9	Phospholipase A1-IIdelta	GO:0008970;GO:0006629	AT2G42690	-3.30233244533624	6.72464102514083e-05
Cc01_g02540	GSCOC_T00009688001	A0A068V9C0	Amino acid permease family protein	GO:0016021;GO:0015203	AT3G13620	-3.29318572094567	0.00589547249376327
Cc11_g10630	GSCOC_T00032552001	A0A068TWD6	Leucoanthocyanidin reductase			-3.27820925683083	0.00120426593202183
Cc02_g15210	GSCOC_T00013962001	A0A068TLG7	O-fucosyltransferase family protein	GO:0016021;GO:0016757;GO:0006004		-3.26219129912631	0.00766124313928541
Cc02_g17170	GSCOC_T00014223001	A0A068TNS4	Beta-galactosidase 3	GO:0004565;GO:0005975	AT4G36360	-3.26082418232571	0.000783088724100125
Cc04_g02840	GSCOC_T00021966001	A0A068TRL1	Aquaporin TIP2-1	GO:0016021;GO:0015267	AT3G16240	-3.25780767352988	0.000424861512291949
Cc02_g05340	GSCOC_T00039040001	A0A068V1Y2	Putative Probably inactive leucine-rich repeat receptor-like protein kinase At3g28040	GO:0016021;GO:0005886;GO:0005524;GO:0004672	AT3G56370	-3.25611675302243	0.00738802700648002
Cc10_g06860	GSCOC_T00034603001	A0A068TXQ1	Phosphate-responsive 1 family protein		AT4G08950	-3.24503165281612	7.82819980087116e-06
Cc02_g15530	GSCOC_T00014005001	A0A068TLN9	Putative uncharacterized protein	GO:0005634;GO:0003677	AT2G47460	-3.24453466984163	7.61755465608623e-05
Cc02_g00580	GSCOC_T00019842001	A0A068U9T8	UP-9A	GO:0098869	AT5G24660	-3.23269326776488	1.87913821452866e-05
Cc10_g03410	GSCOC_T00024865001	A0A068UGF6	Probable galacturonosyltransferase-like 1	GO:0005783;GO:0016757;GO:0052386;GO:0010417;GO:0048366;GO:0032504;GO:0010051		-3.23050076721839	0.00956511480344753
Cc07_g10200	GSCOC_T00037148001	A0A068U1A2	Beta-galactosidase 3	GO:0004565;GO:0030246;GO:0005975	AT4G36360	-3.22186266439144	1.56414885032249e-05
Cc09_g01560	GSCOC_T00017793001	A0A068U7X6	5'-adenylylsulfate reductase 3, chloroplastic	GO:0016671;GO:0019419	AT4G21990	-3.21668600974404	4.13483006473601e-05
Cc03_g07320	GSCOC_T00026577001	A0A068TVP2	Chalcone synthase	GO:0016747;GO:0009058	AT5G13930	-3.20618333015755	0.0012877582881671
Cc09_g03070	GSCOC_T00017592001	A0A068U702	Protein of Unknown Function (DUF239)			-3.20407605810571	0.00177205038647585
Cc05_g09640	GSCOC_T00021558001	A0A068UC82	Probable receptor-like protein kinase At2g42960	GO:0016021;GO:0005524;GO:0004672	AT2G42960	-3.20131070743538	0.000410895354656873
Cc09_g10800	GSCOC_T00041000001	A0A068V3M9	EXORDIUM like 5		AT2G17230	-3.19707457336673	0.00425561539381046
Cc01_g13550	GSCOC_T00028324001	A0A068UND2	Copper transporter 1	GO:0016021;GO:0005375;GO:0006878	AT5G59030	-3.19195498896022	9.59277110620043e-05
Cc00_g13800	GSCOC_T00013305001	A0A068VH61	Glucan endo-1,3-beta-glucosidase 5	GO:0004553;GO:0005975		-3.18954045083578	0.00430561810591695
Cc03_g11110	GSCOC_T00042068001	A0A068V2D4	Hypothetical protein			-3.18810671955855	5.57225023697699e-07
Cc10_g07380	GSCOC_T00034531001	A0A068U093	Putative unknown protein; FUNCTIONS IN			-3.17584294483577	6.24650481799439e-08
Cc11_g14690	GSCOC_T00032023001	A0A068TV59	Polygalacturonase-1 non-catalytic subunit beta		AT1G70370	-3.17164109417296	5.63105290102155e-16
Cc10_g15010	GSCOC_T00033663001	A0A068USW9	Probable cellulose synthase A catalytic subunit 9 [UDP-forming]	GO:0016021;GO:0005886;GO:0016760;GO:0046872;GO:0071555;GO:0030244	AT5G64740	-3.16732918874346	4.79736932678475e-10
Cc11_g10730	GSCOC_T00032540001	A0A068TWC4	Probable transmembrane ascorbate ferrireductase 4	GO:0016021;GO:0016491		-3.16671000528913	0.00254740140942012
Cc07_g07190	GSCOC_T00040057001	A0A068U382	Putative unknown protein; FUNCTIONS IN			-3.14802384621166	0.000839916899103499
Cc00_g27010	GSCOC_T00011934001	A0A068VL90	UDP-glucuronate 4-epimerase 1	GO:0016021		-3.14409276792388	4.62574245917948e-05
Cc04_g02630	GSCOC_T00021938001	A0A068TPL2	Putative downstream target of AGL15-4	GO:0016021		-3.13806110942113	0.00193240138551458
Cc00_g03780	GSCOC_T00002036001	A0A068VBZ5	AAA-ATPase 1	GO:0005524	AT5G40010	-3.13563174536389	4.50068838119433e-06
Cc00_g30720	GSCOC_T00002466001	A0A068VM24	Hypothetical protein			-3.12993483797423	3.39822924883062e-06
Cc10_g09230	GSCOC_T00034272001	A0A068TZQ8	Protein of unknown function (DUF579)	GO:0045492	AT1G33800	-3.12904503690809	2.26349800790897e-06
Cc04_g11650	GSCOC_T00037367001	A0A068UWT4	Pathogenesis-related leaf protein 6	GO:0005576		-3.12812716597239	0.000437463296440496
Cc11_g15510	GSCOC_T00038065001	A0A068UXH6	Protein of Unknown Function (DUF239)			-3.11474343561848	0.00137257112853976
Cc06_g04330	GSCOC_T00023748001	A0A068UET8	S-adenosylmethionine synthase 2	GO:0005524;GO:0046872;GO:0004478;GO:0006730;GO:0006556		-3.10671440853903	9.82972113867331e-10
Cc08_g05740	GSCOC_T00024363001	A0A068UF89	Chitinase-like protein 2	GO:0004568;GO:0016998;GO:0006032	AT1G05850	-3.10332853538283	3.9121198721731e-06
Cc02_g09090	GSCOC_T00029704001	C0ILN6	Putative C-Myc-binding protein homolog	GO:0003713;GO:0006355;GO:0003713;GO:0006355		-3.1030832528262	0.000104126516672306
Cc08_g16650	GSCOC_T00035631001	A0A068UUN2	Putative Stellacyanin	GO:0009055		-3.09314328805773	2.85818299576596e-05
Cc10_g13470	GSCOC_T00035288001	A0A068UUK9	Putative Subtilisin-like protease SDD1	GO:0004252	AT1G04110	-3.08630329514372	1.24648047962917e-06
Cc10_g01310	GSCOC_T00024601001	A0A068UFW4	Probable cinnamyl alcohol dehydrogenase 6	GO:0016491;GO:0008270	AT4G39330	-3.08074212195971	1.97717371810273e-07
Cc09_g01700	GSCOC_T00017774001	A0A068U9W0	Peroxidase 42	GO:0005576;GO:0020037;GO:0046872;GO:0004601;GO:0042744;GO:0006979	AT4G21960	-3.08000683122064	0.000843321492497986
Cc00_g02160	GSCOC_T00001858001	A0A068V9N6	Hypothetical protein			-3.07990390201805	0.00423157858817711
Cc02_g04100	GSCOC_T00020313001	A0A068UA16	21 kDa protein	GO:0004857	AT3G47380	-3.07748923128532	0.000751141694955583
Cc08_g03880	GSCOC_T00034185001	A0A068UTJ6	Putative CASP-like protein RCOM_1206790	GO:0016021;GO:0005886		-3.07642431431812	0.00332049880066556
Cc01_g14410	GSCOC_T00028439001	A0A068ULX5	Plant protein of unknown function (DUF828)		AT5G58600	-3.07063101451558	1.16902899979069e-06
Cc02_g04420	GSCOC_T00020354001	A0A068UCI1	Leucine-rich repeat receptor-like protein kinase TDR	GO:0016021;GO:0005886;GO:0005524;GO:0004674;GO:0051301;GO:0010067;GO:0010223;GO:0010089	AT5G61480	-3.06672877194484	0.00424766508082387
Cc09_g04330	GSCOC_T00017440001	A0A068U6F5	Putative uncharacterized protein			-3.06243469801712	0.00180208664512026
Cc07_g02590	GSCOC_T00039457001	A0A068U1X1	Peroxidase 63	GO:0005576;GO:0020037;GO:0046872;GO:0004601;GO:0042744;GO:0006979	AT5G40150	-3.05150425038788	0.000260302445271746
Cc07_g03260	GSCOC_T00039550001	A0A068U158	Tubulin alpha chain	GO:0005737;GO:0005874;GO:0005525;GO:0003924;GO:0005200;GO:0007017	AT4G14960	-3.0498684073778	5.73479653995206e-05
Cc02_g20290	GSCOC_T00014638001	A0A068TLX2	Pathogenesis-related protein 1B	GO:0005576	AT2G14580	-3.04471436708415	0.00764039963332736
Cc08_g06740	GSCOC_T00005865001	A0A068VE54	Putative Aspartic proteinase nepenthesin-2	GO:0004190		-3.03808279847863	2.54627128473883e-09
Cc00_g19010	GSCOC_T00001295001	A0A068VIT0	Chalcone and stilbene synthase family protein	GO:0016747;GO:0009058	AT5G13930	-3.01963143870469	0.000881251399734722
Cc02_g18970	GSCOC_T00014459001	Q9XGD6	Caffeoyl-CoA O-methyltransferase 1	GO:0008171;GO:0032259	AT4G34050	-3.01618366045161	1.77021333248961e-05
Cc07_g08370	GSCOC_T00040209001	A0A068U377	Putative unknown protein; FUNCTIONS IN			-3.01580433088385	8.44128754999407e-05
Cc00_g25070	GSCOC_T00002590001	A0A068VKN0	Endoglucanase 12	GO:0016021;GO:0008810;GO:0030245	AT1G65610	-2.99757726539348	2.45239982743069e-07
Cc04_g14280	GSCOC_T00001598001	A0A068VBL5	Alpha-galactosidase	GO:0052692;GO:0005975	AT5G08370	-2.98990265273369	7.9903018636087e-09
Cc07_g05670	GSCOC_T00039845001	A0A068U2A8	L-ascorbate oxidase homolog	GO:0005507;GO:0016491		-2.98062315230995	0.00140677532605178
Cc03_g12870	GSCOC_T00030645001	A0A068UNE4	Calmodulin-like protein 5	GO:0005509	AT3G07490	-2.97736649690005	0.00408569332998511
Cc08_g10680	GSCOC_T00027041001	A0A068UJ19	Putative Fatty acid desaturase 1	GO:0016021;GO:0016491;GO:0006629	AT2G46210	-2.97706950884383	1.5762517410436e-08
Cc01_g09890	GSCOC_T00024060001	A0A068UFL3	Glucomannan 4-beta-mannosyltransferase 2	GO:0005794;GO:0016021;GO:0047259;GO:0051753;GO:0010192;GO:0048359	AT5G22740	-2.97331819997477	1.40796377761138e-08
Cc07_g05170	GSCOC_T00039781001	A0A068U258	Probable galacturonosyltransferase-like 2	GO:0016757		-2.96902708836603	0.000346555959927322
Cc08_g10620	GSCOC_T00027034001	A0A068UII1	Zinc transporter 4, chloroplastic	GO:0016021;GO:0005385		-2.96730000805956	0.000713244919938584
Cc00_g26320	GSCOC_T00011918001	A0A068VL21	Putative Lysosomal beta glucosidase	GO:0004553;GO:0005975		-2.94796417746194	0.00260458570953648
Cc05_g13650	GSCOC_T00021035001	A0A068UC52	Calcium-dependent protein kinase isoform 2	GO:0005524;GO:0005509;GO:0004672		-2.93210208982335	9.57559657670909e-07
Cc07_g13390	GSCOC_T00036742001	A0A068TZB1	Glucan endo-1,3-beta-glucosidase 2	GO:0046658;GO:0004553;GO:0005975	AT1G66250	-2.92587359574529	0.000574340809277961
Cc00_g20860	GSCOC_T00007866001	A0A068VJI0	Putative Disease resistance-responsive (dirigent-like protein) family protein	GO:0048046		-2.91170381424131	0.00426191802128209
Cc02_g15400	GSCOC_T00013986001	A0A068TKW0	Probable LRR receptor-like serine/threonine-protein kinase At5g45780	GO:0016021;GO:0005524;GO:0004674		-2.90192762844656	0.0011104967933015
Cc06_g13870	GSCOC_T00041336001	A0A068U328	Putative unknown protein; FUNCTIONS IN	GO:0016021		-2.90166210415531	0.00990349648859393
Cc08_g02370	GSCOC_T00037708001	A0A068UX32	Putative Deacetylvindoline O-acetyltransferase	GO:0016747		-2.89424957637922	0.000366158504091675
Cc02_g32440	GSCOC_T00001246001	A0A068VBL2	Receptor-like cytosolic serine/threonine-protein kinase RBK2	GO:0005524;GO:0004674	AT3G05140	-2.87452412801965	0.000703100412774183
Cc02_g11230	GSCOC_T00029438001	A0A068TUX7	Phenylalanine ammonia-lyase	GO:0016841	AT3G53260	-2.87341648793921	0.00765007764605772
Cc02_g21960	GSCOC_T00014847001	A0A068TN94	Peroxidase 43	GO:0005576;GO:0020037;GO:0046872;GO:0004601;GO:0042744;GO:0006979		-2.86692582647071	1.13935101429777e-09
Cc11_g10170	GSCOC_T00032612001	A0A068TX54	Homocysteine S-methyltransferase 1	GO:0047150;GO:0008270;GO:0009086;GO:0032259		-2.86162133023791	0.000673810208465774
Cc00_g31940	GSCOC_T00009627001	A0A068VMP1	UDP-glucuronate 4-epimerase 6	GO:0005768;GO:0016021;GO:0005802;GO:0050832;GO:0050829;GO:0033481	AT3G23820	-2.8570696994934	2.91031571823982e-12
Cc07_g04950	GSCOC_T00039756001	A0A068U1H5	Putative TRICHOME BIREFRINGENCE-LIKE 19	GO:0016021		-2.85400480150517	3.85224139093174e-05
Cc03_g09600	GSCOC_T00030944001	A0A068UP28	Putative Transcription factor bHLH77	GO:0046983;GO:0006355	AT3G23690	-2.84665498002869	0.00840352944001013
Cc10_g07590	GSCOC_T00034502001	A0A068TY64	P-loop containing nucleoside triphosphate hydrolases superfamily protein	GO:0005874;GO:0005524;GO:0008017;GO:0003777;GO:0007018		-2.83918446861601	0.00659495154341976
Cc08_g01140	GSCOC_T00038426001	A0A068UYZ1	Putative ferredoxin-related			-2.83526913115179	0.00928822977190292
Cc09_g01110	GSCOC_T00017853001	A0A068U815	1-aminocyclopropane-1-carboxylate oxidase	GO:0046872;GO:0016491	AT1G05010	-2.82939722279023	6.30540888513315e-05
Cc02_g16550	GSCOC_T00014148001	A0A068TL49	Predicted protein	GO:0016021		-2.82488095961258	0.00949614788753813
Cc11_g12510	GSCOC_T00032309001	A0A068TYF0	Probable S-acyltransferase At1g69420	GO:0016021;GO:0019706	AT1G69420	-2.82432103672804	0.000343808697693062
Cc03_g05470	GSCOC_T00026303001	A0A068TV80	Putative Phosphoenolpyruvate carboxylase kinase 1	GO:0005524;GO:0004674	AT1G08650	-2.81826083432304	0.000123844219692751
Cc06_g04320	GSCOC_T00023747001	A0A068UE91	unknown protein; FUNCTIONS IN	GO:0016021		-2.81613071780295	0.00519243867301944
Cc05_g11240	GSCOC_T00021340001	A0A068UBQ8	TPR repeat-containing thioredoxin TTL1		AT1G53300	-2.81239255359536	0.000206837806609738
Cc02_g12360	GSCOC_T00029292001	A0A068TTR4	Sugar carrier protein C	GO:0016021;GO:0022857	AT1G11260	-2.80917228319986	0.00350531737783907
Cc01_g09780	GSCOC_T00024045001	A0A068UH55	Arogenate dehydratase/prephenate dehydratase 6, chloroplastic	GO:0009570;GO:0047769;GO:0004664;GO:0009094	AT1G08250	-2.80861461162691	6.26142644696852e-05
Cc01_g17620	GSCOC_T00016300001	A0A068U6L0	Receptor-like serine/threonine-protein kinase ALE2	GO:0016021;GO:0005886;GO:0005524;GO:0004674;GO:0042335;GO:1905393;GO:0046777;GO:0010068	AT2G20300	-2.80686997950007	0.000153499914093361
Cc08_g10430	GSCOC_T00027010001	A0A068UJ03	Pollen-specific protein SF21	GO:0016021;GO:2000012;GO:0009737;GO:0009409;GO:0009753		-2.79911684483419	3.34502336161692e-11
Cc00_g25060	GSCOC_T00002589001	A0A068VKD7	Putative Beta-hexosaminidase subunit B2	GO:0004563;GO:0102148;GO:0005975	AT1G65590	-2.79771777504336	0.00459897346294081
Cc08_g08440	GSCOC_T00009035001	A0A068VFK3	Dehydration-responsive protein RD22			-2.79212340523293	6.39477967427943e-05
Cc01_g01210	GSCOC_T00037967001	A0A068UY08	Putative Disease resistance response protein 206	GO:0048046		-2.79186843565552	2.9499357097334e-05
Cc02_g24440	GSCOC_T00028885001	A0A068UML8	SPX domain-containing protein 3	GO:0016036		-2.7758238473348	3.89844538348978e-06
Cc04_g03410	GSCOC_T00022035001	A0A068TP00	Putative uncharacterized protein			-2.77116546720681	0.00427983354021779
Cc05_g15350	GSCOC_T00038702001	A0A068UZ75	Probable LRR receptor-like serine/threonine-protein kinase At4g26540	GO:0016021;GO:0005524;GO:0004674	AT4G26540	-2.76295217832514	0.00823794999743485
Cc02_g11470	GSCOC_T00029408001	A0A068TTX8	Serine carboxypeptidase-like 27	GO:0004185	AT3G07990	-2.7591972053028	0.00101106326769191
Cc05_g02830	GSCOC_T00020875001	A0A068UAZ0	Probable tyrosine-protein phosphatase At1g05000	GO:0004725		-2.7565023361984	1.21903162011451e-07
Cc02_g32680	GSCOC_T00001208001	A0A068VE39	GDSL esterase/lipase At1g54790	GO:0016788		-2.75405397064101	0.000875489372820299
Cc02_g17450	GSCOC_T00014261001	A0A068TLC4	Uncharacterized protein	GO:0005634;GO:0003677	AT4G39250	-2.7502650645087	0.000579897325597261
Cc02_g36010	GSCOC_T00042761001	A0A068V3E5	Pectinacetylesterase family protein	GO:0005618;GO:0005576;GO:0016787;GO:0071555		-2.74497112017913	7.13187079682785e-07
Cc11_g16080	GSCOC_T00038139001	A0A068UY91	Putative CONTAINS InterPro DOMAIN/s	GO:0010088	AT3G01680	-2.73804738430213	0.000808112476254184
Cc02_g21770	GSCOC_T00014823001	A0A068TQ32	Putative uncharacterized protein	GO:0046872;GO:0030001	AT5G02600	-2.73389287090329	0.00916869108408801
Cc04_g06040	GSCOC_T00022383001	A0A068TSJ5	Probable inactive receptor kinase At1g48480	GO:0016021;GO:0005524;GO:0004672	AT1G48480	-2.7160678866902	3.54015254092828e-05
Cc06_g08460	GSCOC_T00031128001	A0A068UPE4	Peroxidase 25	GO:0005576;GO:0020037;GO:0046872;GO:0004601;GO:0042744;GO:0006979		-2.71044149873278	0.00730459900197635
Cc00_g30080	GSCOC_T00013320001	A0A068VLY1	Protein COBRA	GO:0031225;GO:0016021;GO:0010215	AT5G60920	-2.70794191547795	1.21338189315687e-14
Cc00_g05030	GSCOC_T00000057001	A0A068VCD8	Putative Probably inactive leucine-rich repeat receptor-like protein kinase At2g25790	GO:0048046	AT1G58170	-2.70588602005417	0.00159123980464871
Cc01_g04320	GSCOC_T00004449001	A0A068VA33	Putative Lysosomal Pro-X carboxypeptidase	GO:0008236		-2.69777098554628	3.32912713503962e-06
Cc05_g10320	GSCOC_T00021462001	A0A068UCV1	Interactor of constitutive active ROPs 4		AT1G78430	-2.69363755309853	3.6535598900928e-05
Cc02_g39490	GSCOC_T00027708001	A0A068UJF8	AP2/ERF domain-containing transcription factor	GO:0005634;GO:0003677;GO:0003700	AT1G01250	-2.67897786185894	4.41412990791333e-05
Cc04_g03110	GSCOC_T00022000001	A0A068TNW5	Putative unknown protein; FUNCTIONS IN	GO:0016021		-2.67297255993312	2.83836481827593e-06
Cc00_g18770	GSCOC_T00008464001	A0A068VI08	Putative kinase interacting protein, identical	GO:0003779	AT4G02710	-2.67130229708258	0.000673810208465774
Cc02_g15110	GSCOC_T00013945001	A0A068TLF7	Putative Protein of unknown function (DUF688)			-2.67043932704392	0.0080751471565445
Cc00_g27280	GSCOC_T00007367001	A0A068VKP2	Probable pectate lyase 12	GO:0046872;GO:0030570;GO:0045490		-2.6590066481372	0.00700953031355285
Cc00_g25900	GSCOC_T00006242001	A0A068VNH1	EXORDIUM like 2		AT5G64260	-2.64034403823056	0.000426684400822518
Cc02_g14650	GSCOC_T00013883001	A0A068TKQ7	TRICHOME BIREFRINGENCE-LIKE 38			-2.63778565264607	0.00106190655032988
Cc10_g13710	GSCOC_T00035247001	A0A068UTQ8	Protein kinase protein with adenine nucleotide alpha hydrolases-like domain	GO:0005524;GO:0004672	AT1G23540	-2.63673270485865	0.00184424483327346
Cc08_g03510	GSCOC_T00034133001	A0A068UTY8	Cellulose synthase-like protein D3	GO:0016021;GO:0016760;GO:0071555;GO:0030244	AT3G03050	-2.63081858559581	7.43255631089176e-08
Cc06_g03720	GSCOC_T00023662001	A0A068UE44	L-type lectin-domain containing receptor kinase VIII.1	GO:0016021;GO:0005524;GO:0030246;GO:0004672		-2.62987379256888	0.00251465535766787
Cc02_g04910	GSCOC_T00038982001	A0A068UZ94	Pectinesterase PPME1	GO:0045330;GO:0030599;GO:0042545;GO:0045490		-2.62826223538932	0.00998175009268749
Cc07_g14120	GSCOC_T00036654001	A0A068TZS4	Putative DUF246 domain-containing protein At1g04910	GO:0016757;GO:0006004	AT5G65470	-2.62142979697413	4.57330931857669e-07
Cc02_g08090	GSCOC_T00023550001	A0A068UDJ6	Histone H4	GO:0042025;GO:0000786;GO:0005634;GO:0003677;GO:0046982		-2.61702797350965	0.00260048100175239
Cc07_g12900	GSCOC_T00036817001	A0A068U0N0	Glutamate decarboxylase	GO:0004351;GO:0030170;GO:0006536	AT5G17330	-2.60274413087421	0.000121039451384818
Cc03_g04670	GSCOC_T00026194001	A0A068TUY9	Auxin-responsive protein IAA7	GO:0005634;GO:0009734;GO:0006355	AT3G23050	-2.60210676837063	0.00469382124087139
Cc03_g08490	GSCOC_T00033270001	A0A068UUC6	Adenosylhomocysteinase	GO:0004013;GO:0006730		-2.59033325354582	0.00149651723901854
Cc00_g17490	GSCOC_T00008151001	A0A068VHZ0	Protein ASPARTIC PROTEASE IN GUARD CELL 1	GO:0004190	AT3G18490	-2.58966880949234	1.04702984701757e-10
Cc02_g27850	GSCOC_T00025137001	A0A068UGU3	Putative uncharacterized protein			-2.58068798661951	0.000153717030217485
Cc08_g02380	GSCOC_T00037709001	A0A068UXF3	Ent-kaurenoic acid oxidase 2	GO:0016021;GO:0020037;GO:0005506;GO:0004497;GO:0016705	AT2G32440	-2.57656459338631	0.00651508261349197
Cc03_g04880	GSCOC_T00026219001	A0A068TTA3	Putative TPX2 (targeting protein for Xklp2) protein family		AT3G23090	-2.56453791535694	0.00226328307177234
Cc07_g15500	GSCOC_T00036468001	A0A068TZQ3	Putative Pollen allergen Che a 1	GO:0005615		-2.56379847236621	3.12449528867871e-07
Cc02_g39450	GSCOC_T00027714001	A0A068UKD1	Putative Protein ASPARTIC PROTEASE IN GUARD CELL 1	GO:0004190	AT1G01300	-2.56171587704742	0.000123844219692751
Cc06_g01600	GSCOC_T00023385001	A0A068UE76	Putative BAHD acyltransferase DCR	GO:0016747		-2.55324394357935	4.16700123203015e-06
Cc03_g05720	GSCOC_T00026337001	A0A068TV94	dCTP pyrophosphatase 1	GO:0005829;GO:0047840;GO:0000287;GO:0006253;GO:0042262		-2.54760096579101	0.000683918895920661
Cc09_g03670	GSCOC_T00017517001	A0A068U6V5	Isopentenyl-diphosphate Delta-isomerase II	GO:0016853;GO:0016787;GO:0004452;GO:0008299		-2.54234108599939	0.000110807601584205
Cc01_g16260	GSCOC_T00016463001	A0A068U5W6	Hypothetical protein			-2.54232081522159	0.00132190635396518
Cc06_g02730	GSCOC_T00023534001	A0A068UED6	Putative E3 ubiquitin-protein ligase XBAT31		AT2G28840	-2.52092012183684	0.00371736052758902
Cc04_g06970	GSCOC_T00022498001	A0A068TQ84	Calmodulin binding protein-like	GO:0005634;GO:0005516;GO:0003700;GO:0043565;GO:0071219;GO:0042742;GO:0002229;GO:1900426;GO:0080142;GO:0010112;GO:0010224	AT1G73805	-2.50871936807188	0.000941781278187455
Cc02_g26520	GSCOC_T00024949001	A0A068UHA1	Putative Protein PHLOEM PROTEIN 2-LIKE A1			-2.50599197082705	9.19377123762618e-06
Cc01_g14140	GSCOC_T00028405001	A0A068ULQ3	Ammonium transporter 1 member 3	GO:0016021;GO:0008519	AT4G13510	-2.49537471628142	8.12912802808403e-05
Cc04_g08320	GSCOC_T00022688001	A0A068TQL0	Putative Subtilisin-like protease	GO:0004252	AT4G30020	-2.49489516110457	0.00447748490700636
Cc04_g01580	GSCOC_T00021815001	A0A068TPA9	Putative uncharacterized protein	GO:0005829;GO:0016021;GO:0005634;GO:0005886		-2.47878828563126	0.00677760372167652
Cc05_g08480	GSCOC_T00016870001	A0A068V5V5	Peroxidase 4	GO:0020037;GO:0046872;GO:0004601;GO:0042744;GO:0006979	AT5G05340	-2.47784742998844	9.16404935799804e-06
Cc11_g06510	GSCOC_T00020667001	A0A068UD35	Putative receptor like protein 13	GO:0016021		-2.47028457675238	0.00209205927380652
Cc05_g10860	GSCOC_T00021388001	A0A068UEH9	Probable leucine-rich repeat receptor-like serine/threonine-protein kinase At3g14840	GO:0016021;GO:0005524;GO:0004672		-2.46129863333338	0.00626931214241378
Cc04_g00650	GSCOC_T00021687001	A0A068TPC5	Putative uncharacterized protein			-2.46116277074401	0.00677419767159333
Cc08_g08890	GSCOC_T00017226001	A0A068V668	Putative BURP domain-containing protein 5			-2.45434304425117	0.00326867532158583
Cc00_g22360	GSCOC_T00000298001	A0A068VJI2	Hypothetical protein			-2.45001985198345	5.94615326333561e-07
Cc02_g37180	GSCOC_T00028028001	A0A068UK94	Putative Vacuolar iron transporter 1	GO:0016021;GO:0005384;GO:0030026		-2.43351578683848	0.00335916205717124
Cc09_g00220	GSCOC_T00017977001	A0A068U7Q0	Farnesyl pyrophosphate synthase 1	GO:0016765;GO:0008299		-2.42143748303987	0.00224987375334128
Cc04_g01110	GSCOC_T00021745001	A0A068TNB8	Lung seven transmembrane receptor family protein	GO:0016021		-2.4048130169363	0.00198944818830059
Cc07_g15610	GSCOC_T00036455001	A0A068U1C7	L-ascorbate oxidase	GO:0005576;GO:0005507;GO:0016491		-2.40351322965137	0.00995628023885532
Cc04_g03220	GSCOC_T00022015001	A0A068TP57	ATP binding microtubule motor family protein	GO:0005874;GO:0005634;GO:0005886;GO:0005524;GO:0008017;GO:0003777;GO:0007018;GO:1903338	AT3G16060	-2.40120257845436	0.000500454465378457
Cc05_g13360	GSCOC_T00021073001	A0A068UDT3	early nodulin-like protein 9	GO:0009055	AT2G25060	-2.39674006253555	0.00775405670740973
Cc06_g08450	GSCOC_T00031130001	A0A068UPP2	SPX domain-containing protein 2	GO:0016036		-2.38601575363326	0.000184546562400872
Cc02_g05600	GSCOC_T00039073001	A0A068V082	Putative WEB family protein At2g38370		AT2G40480	-2.38474550015533	0.00371736052758902
Cc11_g06730	GSCOC_T00020698001	A0A068UAI3	Putative LRR receptor-like serine/threonine-protein kinase ERECTA	GO:0016021	AT2G33030	-2.37551055883455	0.00134647475311688
Cc06_g17550	GSCOC_T00040335001	A0A068UZZ5	Putative Probable leucine-rich repeat receptor-like protein kinase At1g35710	GO:0005524;GO:0004672		-2.36576499667689	0.00465517741102012
Cc02_g02580	GSCOC_T00020116001	A0A068UAE6	BAHD acyltransferase DCR	GO:0005737;GO:0016747;GO:0010143;GO:0051179;GO:0010090	AT5G23940	-2.36344020172056	6.62844397606898e-06
Cc09_g08670	GSCOC_T00020843001	A0A068UBV7	Putative BAG family molecular chaperone regulator 2	GO:0051087		-2.3623922740164	9.11977714216022e-06
Cc02_g38120	GSCOC_T00027905001	A0A068UKH9	Aquaporin PIP1-3	GO:0016021;GO:0015267		-2.35762734940173	0.000328375370468996
Cc02_g19090	GSCOC_T00014473001	A0A068TLN2	Uncharacterized protein At4g06744		AT4G06744	-2.35145798307594	9.15770370399924e-05
Cc01_g08550	GSCOC_T00023883001	A0A068UE74	Serine/threonine-protein kinase Nek5	GO:0005524;GO:0004672		-2.34869443815239	5.06509878024571e-06
Cc08_g12830	GSCOC_T00030424001	A0A068UN90	unknown protein; BEST Arabidopsis thaliana protein match is			-2.33726111160504	0.0059856457930659
Cc02_g04640	GSCOC_T00020381001	A0A068U9Z4	Acid phosphatase 1	GO:0003993		-2.33502654427879	0.000452090431901434
Cc02_g37120	GSCOC_T00028035001	A0A068UKR7	Putative peptidoglycan-binding LysM domain-containing protein	GO:0016021		-2.32532001209517	0.000822139784540815
Cc00_g31820	GSCOC_T00004172001	A0A068VML3	Putative Strictosidine synthase 1	GO:0016844;GO:0009058	AT1G74020	-2.31964547073301	0.000255238748544915
Cc07_g18080	GSCOC_T00018805001	A0A068U985	Probable pectinesterase/pectinesterase inhibitor 51	GO:0045330;GO:0004857;GO:0030599;GO:0042545;GO:0045490		-2.31546188748011	0.00407851955862752
Cc08_g02700	GSCOC_T00037754001	A0A068UXN2	Carboxylesterase 1	GO:0016787	AT5G62180	-2.30662103677905	0.00176683863162801
Cc07_g03170	GSCOC_T00039535001	A0A068U1R0	Putative Aldose 1-epimerase	GO:0004034;GO:0030246;GO:0019318		-2.30513199452662	0.00743428402259529
Cc06_g06460	GSCOC_T00031380001	A0A068UPZ6	NDR1/HIN1-like 1	GO:0016021	AT3G11660	-2.30341213567092	2.36573780212409e-05
Cc02_g17600	GSCOC_T00014280001	A0A068TLD9	Probable receptor-like serine/threonine-protein kinase At4g34500	GO:0016021;GO:0005524;GO:0004674	AT4G34500	-2.30228637139128	0.00146049374987202
Cc02_g13790	GSCOC_T00029096001	A0A068TVX4	Putative Protein E6			-2.29634340751939	0.00110039749179453
Cc00_g10320	GSCOC_T00008233001	A0A068VG06	Putative Protein ASPARTIC PROTEASE IN GUARD CELL 1	GO:0016021;GO:0004190		-2.28939259246266	0.00106393916381911
Cc05_g03500	GSCOC_T00033572001	A0A068USY3	Putative Protein ASPARTIC PROTEASE IN GUARD CELL 1	GO:0016021;GO:0004190	AT5G10770	-2.28586618491324	0.000424861512291949
Cc03_g01950	GSCOC_T00025828001	A0A068TRK7	ralf-like 33		AT3G16570	-2.28221449141725	6.30501560626077e-09
Cc00_g06800	GSCOC_T00007409001	A0A068VDI8	Fasciclin-like arabinogalactan protein 2	GO:0005886;GO:0005774	AT4G12730	-2.27510154116348	0.00450161110351432
Cc10_g15400	GSCOC_T00033719001	A0A068USP4	Purine permease 3	GO:0016021;GO:0015211	AT1G28220	-2.2702502639811	0.000406939402674729
Cc04_g03630	GSCOC_T00022059001	A0A068TPY1	Nucleotide-diphospho-sugar transferases superfamily protein			-2.26743371535274	0.00021640311023506
Cc02_g24810	GSCOC_T00028837001	A0A068UMC9	Putative uncharacterized protein	GO:0005634;GO:0003677;GO:0003700	AT2G44940	-2.2574774049476	0.00371736052758902
Cc02_g09340	GSCOC_T00029665001	A0A068TX53	Putative Cytosolic sulfotransferase 5	GO:0008146	AT3G45070	-2.25659733379385	5.04377983115069e-07
Cc11_g16830	GSCOC_T00038230001	A0A068UYF4	65-kDa microtubule-associated protein 8	GO:0005874;GO:0009524;GO:0005819;GO:0008017;GO:0000226		-2.25030434761637	6.01748512919962e-06
Cc06_g18800	GSCOC_T00028908001	A0A068UMN6	Putative methyltransferase DDB_G0268948	GO:0008168		-2.24740808176728	0.00896653974819242
Cc10_g06800	GSCOC_T00034609001	A0A068TXW0	Putative Purine permease 3	GO:0016021;GO:0015211		-2.24585436167195	0.00677419767159333
Cc02_g35750	GSCOC_T00042800001	A0A068V3T2	Probable receptor-like protein kinase At2g42960	GO:0016021;GO:0005524;GO:0004672	AT5G18500	-2.24355484177619	0.00465517741102012
Cc02_g10080	GSCOC_T00029568001	A0A068TV65	Cytochrome P450 77A3	GO:0016021;GO:0020037;GO:0005506;GO:0004497;GO:0016705	AT5G04660	-2.2420657660776	0.00329591275678559
Cc07_g12910	GSCOC_T00036815001	A0A068U286	Glutamate decarboxylase	GO:0004351;GO:0030170;GO:0006536	AT2G02000	-2.21439834386941	1.65021520425219e-06
Cc02_g11290	GSCOC_T00029429001	A0A068TWN2	Putative GATA transcription factor 9	GO:0005634;GO:0043565;GO:0008270;GO:0007623;GO:0045893;GO:0009845	AT3G54810	-2.20575257608673	8.89402161781614e-07
Cc04_g00830	GSCOC_T00021708001	A0A068TP49	Subtilisin-like protease	GO:0004252	AT3G14240	-2.20313090964707	1.69698559954387e-08
Cc02_g07100	GSCOC_T00009472001	A0A068VGA5	Uncharacterized protein	GO:0016021;GO:0008270		-2.20307736105498	0.00245015071092496
Cc09_g06740	GSCOC_T00005130001	A0A068VAL3	Putative Transmembrane protein 56	GO:0016021		-2.18708295652287	0.00146413681713729
Cc07_g06510	GSCOC_T00039961001	A0A068U1Z9	Putative Xyloglucan galactosyltransferase KATAMARI1 homolog	GO:0016757;GO:0006486	AT5G62220	-2.18154229999878	0.00659495154341976
Cc04_g09710	GSCOC_T00000092001	A0A068VJ03	Probable arabinose 5-phosphate isomerase	GO:0097367;GO:0016853;GO:1901135;GO:0005975		-2.1792242888902	0.0025373384015153
Cc06_g04820	GSCOC_T00043005001	A0A068V3F9	Eukaryotic aspartyl protease family protein	GO:0004190		-2.16930652305727	0.00716627297421166
Cc07_g08570	GSCOC_T00040236001	A0A068U392	Non-specific lipid-transfer protein 2	GO:0006869		-2.16127750828364	1.94775463473182e-05
Cc07_g00040	GSCOC_T00019066001	A0A068V7G5	Uncharacterised conserved protein UCP015417, _x0001_vWA			-2.1607355502763	0.00901926702770721
Cc11_g10190	GSCOC_T00032610001	A0A068TWD9	3-ketoacyl-CoA synthase 6	GO:0016021;GO:0016747;GO:0006633	AT1G68530	-2.15821353016329	6.24457913967513e-05
Cc06_g02700	GSCOC_T00023529001	A0A068UEK0	Actin	GO:0005737;GO:0005856;GO:0005524	AT3G12110	-2.14950103527825	1.14927099816909e-05
Cc03_g01080	GSCOC_T00025711001	A0A068TS62	Hypothetical protein			-2.14381098316921	6.62844397606898e-06
Cc01_g11150	GSCOC_T00024233001	A0A068UEX3	Hypothetical protein	GO:0016021		-2.14038794714055	0.00608509064442677
Cc00_g04150	GSCOC_T00006602001	A0A068VBR8	Auxin-responsive family protein	GO:0016021;GO:0046872;GO:0055114		-2.13899177442407	0.000187636779508946
Cc05_g10280	GSCOC_T00021472001	A0A068UC72	Hypothetical protein	GO:0016021		-2.13741710832594	0.000206837806609738
Cc02_g27290	GSCOC_T00025056001	A0A068UHP9	Furcatin hydrolase	GO:0004553;GO:0005975	AT5G44640	-2.13706886163255	0.00366465152833817
Cc04_g14900	GSCOC_T00040775001	A0A068V3D3	Putative Uncharacterized protein At5g01610		AT5G01610	-2.12741281658982	0.00677419767159333
Cc07_g16820	GSCOC_T00037513001	A0A068UYX7	Cellulose synthase A catalytic subunit 5 [UDP-forming]	GO:0016021;GO:0005886;GO:0016760;GO:0046872;GO:0071555;GO:0030244		-2.12452204857004	3.30632990183245e-12
Cc06_g15730	GSCOC_T00030781001	A0A068UPJ1	Plant protein of unknown function (DUF828)	GO:0016021	AT5G06700	-2.11133410999356	5.0900262667769e-08
Cc07_g07850	GSCOC_T00040147001	A0A068U2D8	Protein of unknown function (duplicated DUF1399)		AT4G37900	-2.10650465493334	0.000419142896460581
Cc08_g07270	GSCOC_T00025342001	A0A068UJR3	Probable LRR receptor-like serine/threonine-protein kinase At1g14390	GO:0016021;GO:0005524;GO:0004672	AT2G02780	-2.10216919972681	3.25234433711129e-05
Cc11_g09770	GSCOC_T00032673001	A0A068TXA2	Probable protein phosphatase 2C 15	GO:0004722		-2.1019306844234	2.67483285956572e-05
Cc04_g16160	GSCOC_T00042408001	A0A068V331	Putative Microtubule-associated protein TORTIFOLIA1	GO:0005874;GO:0008017	AT5G62580	-2.09515394773846	0.00949102117101532
Cc07_g10330	GSCOC_T00037131001	A0A068U098	Putative Leucine-rich repeat receptor-like protein kinase PEPR2			-2.08182383969161	0.00563114441368335
Cc10_g15510	GSCOC_T00033733001	A0A068UT24	Putative UPF0483 protein AGAP003155			-2.07508813173221	0.000594637862296946
Cc02_g39120	GSCOC_T00027761001	A0A068UKB5	Putative WRKY transcription factor 30	GO:0005634;GO:0003700;GO:0043565	AT4G11070	-2.07029559448921	0.000166885010938222
Cc07_g00640	GSCOC_T00019142001	A0A068V7U0	FUNCTIONS IN	GO:0005886		-2.06844862694359	0.000808112476254184
Cc05_g10790	GSCOC_T00021397001	A0A068UBV6	TRICHOME BIREFRINGENCE-LIKE 41		AT3G14850	-2.06410736682863	0.00474581949092398
Cc02_g08570	GSCOC_T00029776001	A0A068TUN4	Chalcone--flavonone isomerase	GO:0016872	AT3G55120	-2.05918300486756	0.00677334149472641
Cc05_g05300	GSCOC_T00035097001	A0A068UU57	Protein of unknown function (DUF1218)	GO:0016021		-2.05422532582214	0.00734690836108478
Cc00_g20120	GSCOC_T00001107001	A0A068VJ62	AAA-ATPase 1	GO:0016021;GO:0005524		-2.05372994577971	0.00327598002198637
Cc04_g00340	GSCOC_T00021638001	A0A068TQX2	O-fucosyltransferase family protein	GO:0016021;GO:0016757;GO:0006004	AT1G51630	-2.04415972299572	0.000180040643082192
Cc02_g19060	GSCOC_T00014469001	A0A068TMK9	CBS domain-containing protein CBSX1, chloroplastic	GO:0009570;GO:0045454		-2.04173149806995	0.00534629287235884
Cc08_g05190	GSCOC_T00042434001	A0A068V2Q0	Probable methyltransferase PMT20	GO:0016021;GO:0008168;GO:0032259		-2.03611112636289	0.000513543508893251
Cc03_g00800	GSCOC_T00025675001	A0A068TRB5	ATP-citrate synthase beta chain protein 1	GO:0046912		-2.03415389586867	0.00839667692481727
Cc01_g06530	GSCOC_T00030041001	A0A068UMY0	Early nodulin-like protein	GO:0016021;GO:0009055	AT5G15350	-2.02799827781829	1.84655336451485e-05
Cc10_g07600	GSCOC_T00034501001	A0A068TXN0	Putative uncharacterized protein			-2.01970105575883	5.85163799155034e-05
Cc03_g04660	GSCOC_T00026193001	A0A068TSZ6	Auxin-induced protein 22B	GO:0005634;GO:0009734;GO:0006355	AT5G43700	-2.01750042368767	2.4011000653377e-05
Cc06_g16450	GSCOC_T00030691001	A0A068UP49	nucleolar protein gar2-related			-2.01461836470809	0.000178677760664366
Cc01_g11270	GSCOC_T00024252001	A0A068UFT2	Beta-galactosidase 8	GO:0004565;GO:0030246;GO:0005975	AT2G28470	-2.01102238510457	0.0015165517871828
Cc01_g19450	GSCOC_T00016056001	A0A068U554	Cyclin-P3-1	GO:0019901;GO:0000079	AT3G63120	-2.0109503876832	0.000121663137510026
Cc02_g04030	GSCOC_T00020306001	A0A068UAU4	EXORDIUM like 3	GO:0009505;GO:0009506;GO:0080167	AT5G51550	-2.00699375607346	1.93383718685423e-06
Cc08_g03030	GSCOC_T00037810001	A0A068UXM2	ABC transporter B family member 2	GO:0016021;GO:0005524;GO:0016887;GO:0042626	AT4G25960	-1.99482464794649	0.00837132547124558
Cc07_g06140	GSCOC_T00039910001	A0A068U2X1	F-box protein At5g67140		AT5G67140	-1.99422969967941	0.000201329166871619
Cc01_g20580	GSCOC_T00015916001	A0A068U7C7	Glutathione S-transferase			-1.99013221713536	0.00224987375334128
Cc02_g33320	GSCOC_T00015359001	A0A068V4P9	Probable linoleate 9S-lipoxygenase 5	GO:0046872;GO:0016702;GO:0031408	AT1G55020	-1.97866048630301	0.00154626935984983
Cc11_g10570	GSCOC_T00032560001	A0A068TX04	Putative leucine-rich repeat receptor-like serine/threonine-protein kinase At2g14440	GO:0005768;GO:0016021;GO:0005886;GO:0005802;GO:0005773		-1.9773494041798	0.000673810208465774
Cc11_g14930	GSCOC_T00001041001	A0A068VH36	Probable peptide/nitrate transporter At5g13400	GO:0016021;GO:0022857;GO:0006857	AT5G13400	-1.97290875779955	0.00158710469719015
Cc03_g08480	GSCOC_T00033269001	A0A068USD9	Serine hydroxymethyltransferase 1	GO:0004372;GO:0030170;GO:0019264;GO:0035999		-1.94748012757335	0.00567083462596706
Cc02_g05130	GSCOC_T00039013001	A0A068UZZ4	Probable inactive receptor kinase At5g58300	GO:0016021;GO:0005524;GO:0004672	AT5G58300	-1.93419503874638	5.83133667361597e-08
Cc00_g14920	GSCOC_T00001123001	A0A068VK52	Germin-like protein 1-2	GO:0048046;GO:0005618;GO:0030145;GO:0045735	AT1G18970	-1.9304224177358	0.00450161110351432
Cc04_g07370	GSCOC_T00022553001	A0A068TQB5	Putative Protein ASPARTIC PROTEASE IN GUARD CELL 1	GO:0004190;GO:0009737;GO:0009414	AT3G18490	-1.92968095248919	0.00178546069788545
Cc06_g13850	GSCOC_T00041339001	A0A068U5M4	Putative uncharacterized protein	GO:0016021		-1.9238162170764	0.000153499914093361
Cc01_g20020	GSCOC_T00015983001	A0A068U5X3	Histone H2AX	GO:0000786;GO:0005634;GO:0003677;GO:0046982	AT1G08880	-1.91528229686582	0.000728471159766387
Cc00_g24050	GSCOC_T00009221001	A0A068VK27	Putative Dehydration-responsive protein RD22		AT5G25610	-1.88760303674827	0.000430159631646689
Cc11_g08440	GSCOC_T00032875001	A0A068TWX3	unknown protein; BEST Arabidopsis thaliana protein match is			-1.87974169217786	0.00773317243191519
Cc07_g14150	GSCOC_T00036651001	A0A068U051	MADS-box protein SVP	GO:0005634;GO:0003700;GO:0046983;GO:0000977;GO:0045944	AT2G22540	-1.87765883761466	9.16404935799804e-06
Cc11_g08100	GSCOC_T00032921001	A0A068TY20	Protein PLANT CADMIUM RESISTANCE 2	GO:0016021		-1.8752956434093	0.000778468398008017
Cc06_g13300	GSCOC_T00041417001	A0A068U5T0	P-loop containing nucleoside triphosphate hydrolases superfamily protein	GO:0005524	AT5G57480	-1.8723238200123	0.000968408160834385
Cc10_g06820	GSCOC_T00034607001	A0A068TYU2	Phospho-2-dehydro-3-deoxyheptonate aldolase 1, chloroplastic	GO:0009507;GO:0003849;GO:0009073;GO:0009423		-1.87016847714319	0.00214758643226413
Cc11_g13000	GSCOC_T00032239001	A0A068TWK3	RING/FYVE/PHD zinc finger superfamily protein	GO:0016021;GO:0008270		-1.85802048927241	5.61827378836812e-07
Cc03_g01090	GSCOC_T00025712001	A0A068TR59	cAMP-regulated phosphoprotein 19-related protein			-1.85681009324519	0.00294691241813818
Cc02_g26270	GSCOC_T00028630001	A0A068ULJ6	Probable xyloglucan endotransglucosylase/hydrolase protein 30	GO:0048046;GO:0005618;GO:0004553;GO:0016762;GO:0071555;GO:0006073		-1.84645556509211	0.00563130929168161
Cc04_g14360	GSCOC_T00004341001	A0A068VC54	Putative Receptor-like protein 12	GO:0016021		-1.84241890554526	0.000346033301193424
Cc05_g12390	GSCOC_T00021196001	A0A068UBF1	Protein of unknown function (DUF1218)	GO:0016021		-1.8192850660966	0.00414392263153494
Cc06_g17090	GSCOC_T00012652001	A0A068VHT4	Protein of unknown function (DUF288)	GO:0016021		-1.81119975133476	0.000333559854938923
Cc10_g06590	GSCOC_T00034635001	A0A068TYJ7	Ring finger protein, putative	GO:0016021		-1.79917623499107	0.00403246917076449
Cc06_g17600	GSCOC_T00040342001	A0A068V000	Putative unknown protein; FUNCTIONS IN	GO:0016021		-1.79754683647131	0.000177132296284537
Cc01_g14500	GSCOC_T00028449001	A0A068UNQ8	Protein CHUP1, chloroplastic			-1.79135087736518	0.00387309677856653
Cc10_g03330	GSCOC_T00024857001	A0A068UIV8	Putative uncharacterized protein	GO:0005634;GO:0003677;GO:0006355		-1.78260449158834	0.00430342098322218
Cc05_g11990	GSCOC_T00021246001	A0A068UBI7	Core-2/I-branching beta-1,6-N-acetylglucosaminyltransferase family protein	GO:0016020		-1.77855338530227	0.000141530821934807
Cc02_g01140	GSCOC_T00019923001	A0A068U8Y1	Putative Major facilitator superfamily domain-containing protein 5	GO:0016021;GO:0015098		-1.76343551795434	0.000108967039292673
Cc01_g16790	GSCOC_T00016400001	A0A068U6F8	Putative RPM1-interacting protein 4			-1.76271010223883	0.00343255134772335
Cc04_g02390	GSCOC_T00021910001	A0A068TRG2	GDSL esterase/lipase APG	GO:0016788	AT3G16370	-1.75626016633979	0.00718572557307797
Cc07_g08840	GSCOC_T00040274001	A0A068U3P4	3-ketoacyl-CoA synthase 6	GO:0016021;GO:0016747;GO:0006633	AT1G68530	-1.74797400440645	0.00235240931400311
Cc08_g00920	GSCOC_T00038450001	A0A068UYI7	Cellulose synthase A catalytic subunit 1 [UDP-forming]	GO:0016021;GO:0005886;GO:0016760;GO:0046872;GO:0071555;GO:0030244	AT4G32410	-1.74468291151213	1.55226276329364e-08
Cc06_g10470	GSCOC_T00041775001	A0A068U448	Nucleotide-diphospho-sugar transferases superfamily protein	GO:0016021;GO:0016757		-1.74100951467925	0.0097904150010884
Cc02_g11580	GSCOC_T00029393001	A0A068TUV1	Uncharacterized protein		AT4G04900	-1.73984942426519	0.000343808697693062
Cc02_g32510	GSCOC_T00001236001	A0A068VAV1	Sugar transporter ERD6-like 5	GO:0016021;GO:0022857	AT1G54730	-1.73852902425049	0.00381881907772259
Cc03_g01220	GSCOC_T00025728001	A0A068TTY2	COBRA-like protein 7	GO:0031225;GO:0016021;GO:0010215	AT4G16120	-1.73802440289187	0.00802758644453934
Cc02_g05790	GSCOC_T00039098001	A0A068V224	Wound-induced protein 1			-1.73686682815609	0.000159851347790123
Cc00_g25380	GSCOC_T00010259001	A0A068VKV4	Reticuline oxidase-like protein	GO:0071949;GO:0016491		-1.73537434979507	0.00270889567846577
Cc07_g07220	GSCOC_T00040061001	A0A068U2U5	Galactomannan galactosyltransferase 1	GO:0016021;GO:0016757;GO:0016021;GO:0016757	AT4G37690	-1.73363915753748	0.000441260190797724
Cc06_g04020	GSCOC_T00023706001	A0A068UE68	Adenosine kinase 2	GO:0004001;GO:0006166	AT5G03300	-1.71891281515217	2.2087963241685e-05
Cc02_g01730	GSCOC_T00020003001	A0A068UA61	Putative Probable receptor-like protein kinase At1g67000	GO:0016021;GO:0005524;GO:0030247;GO:0004672		-1.71475492976295	0.00580542820772183
Cc04_g01310	GSCOC_T00021774001	A0A068TND9	Putative alpha/beta-Hydrolases superfamily protein			-1.70934999300939	0.00215400479759681
Cc09_g05050	GSCOC_T00007077001	A0A068VCA0	Cationic amino acid transporter 5	GO:0016021;GO:0022857	AT2G34960	-1.695100952782	0.00738802700648002
Cc00_g07510	GSCOC_T00000516001	A0A068VEB2	Putative Protein TRANSPARENT TESTA 12	GO:0016021;GO:0015297;GO:0042910		-1.69482131707167	0.00819631913154245
Cc02_g15470	GSCOC_T00013995001	A0A068TNA5	Putative Receptor-like protein 12	GO:0016021	AT4G18760	-1.68823153057405	0.0080744133434584
Cc01_g00380	GSCOC_T00013680001	A0A068VLD0	Benzyl alcohol O-benzoyltransferase	GO:0016747		-1.68256357746804	0.001081957741268
Cc00_g29460	GSCOC_T00011720001	A0A068VPI5	Putative Heavy metal transport/detoxification superfamily protein	GO:0009507;GO:0046872;GO:0019904;GO:0006878;GO:0030001;GO:0046686		-1.67788916657023	0.00589547249376327
Cc01_g21810	GSCOC_T00004935001	A0A068V8Z0	ABC transporter B family member 11	GO:0016021;GO:0005524;GO:0016887;GO:0042626	AT3G62150	-1.66041058243239	6.8231467997546e-05
Cc11_g06520	GSCOC_T00020669001	A0A068UBI6	Putative Probably inactive leucine-rich repeat receptor-like protein kinase At2g25790			-1.65596512372703	0.00181285217764753
Cc09_g07440	GSCOC_T00036257001	A0A068UVZ5	Reticuline oxidase-like protein	GO:0071949;GO:0016491	AT4G20840	-1.65162568914142	0.00140209407668785
Cc01_g20830	GSCOC_T00005053001	A0A068V8M6	UDP-glucuronic acid decarboxylase 1			-1.64905850640902	0.00305652237644728
Cc04_g01850	GSCOC_T00021847001	A0A068TPN4	Beta-fructofuranosidase, insoluble isoenzyme CWINV1	GO:0004553;GO:0005975		-1.64735869994667	0.00224302945688574
Cc11_g10560	GSCOC_T00032561001	A0A068TYZ8	AP2/ERF and B3 domain-containing transcription repressor TEM1	GO:0005634;GO:0003677;GO:0003700		-1.64211250577981	4.05566075293615e-05
Cc07_g08290	GSCOC_T00040198001	A0A068U3K6	unknown protein; FUNCTIONS IN			-1.6169007795794	0.00772649159250441
Cc10_g16040	GSCOC_T00033814001	A0A068USJ4	Putative Reticuline oxidase	GO:0071949;GO:0016491		-1.61655379278063	0.00201311109630893
Cc02_g36780	GSCOC_T00003879001	A0A068VAE0	Endoglucanase 25	GO:0009504;GO:0005769;GO:0016021;GO:0005886;GO:0005802;GO:0008810;GO:0030244;GO:0030245;GO:0043622;GO:0042538;GO:0009735;GO:0048367;GO:0009826	AT5G49720	-1.60190234483104	0.000236110262894059
Cc06_g01510	GSCOC_T00023372001	A0A068UD59	Auxin transporter-like protein 2	GO:0016021	AT2G38120	-1.57736261581482	0.00137257112853976
Cc06_g13680	GSCOC_T00041359001	A0A068U301	Probable 1-deoxy-D-xylulose-5-phosphate synthase 2, chloroplastic	GO:0008661;GO:0016114		-1.57649552024525	0.000126327676594713
Cc02_g34690	GSCOC_T00000730001	A0A068V9T2	Putative uncharacterized protein	GO:0005516	AT4G25800	-1.57273281960601	0.00369031461507097
Cc02_g17540	GSCOC_T00014273001	A0A068TL46	Probable LRR receptor-like serine/threonine-protein kinase At2g16250	GO:0005524;GO:0004672		-1.57022400023228	0.00267721098297584
Cc01_g21290	GSCOC_T00004997001	A0A068V996	Heat shock protein DnaJ with tetratricopeptide repeat			-1.56911508533107	0.00160850302795028
Cc08_g16960	GSCOC_T00035674001	A0A068UV33	Glucan endo-1,3-beta-glucosidase 11	GO:0016021;GO:0004553;GO:0005975		-1.54590568347428	4.70071601951626e-05
Cc01_g13210	GSCOC_T00028284001	A0A068ULH8	BAG family molecular chaperone regulator 1	GO:0051087		-1.54182395967115	5.93269136472885e-05
Cc09_g00890	GSCOC_T00017886001	A0A068U8F8	Putative Acyl-CoA--sterol O-acyltransferase 1	GO:0016021;GO:0008374		-1.53688281503162	0.00840352944001013
Cc10_g03340	GSCOC_T00024858001	A0A068UH82	unknown protein; FUNCTIONS IN			-1.52377615184936	0.00627962364002622
Cc04_g03820	GSCOC_T00022090001	A0A068TPC0	Putative Monoglyceride lipase	GO:0005783;GO:0005794;GO:0005886;GO:0009506;GO:0003846;GO:0090430;GO:0004622;GO:0046686;GO:0042542;GO:0010043		-1.50344674588117	0.000728471159766387
Cc03_g05450	GSCOC_T00026300001	A0A068TSN3	Probable inorganic phosphate transporter 1-3	GO:0016021;GO:0005315;GO:0006817	AT2G38940	-1.48959744130153	6.39477967427943e-05
Cc11_g08480	GSCOC_T00032866001	A0A068TX31	Putative Protein PLANT CADMIUM RESISTANCE 2		AT1G14870	-1.48366457085475	0.00267721098297584
Cc07_g12430	GSCOC_T00036875001	A0A068TZS5	Putative unknown protein; FUNCTIONS IN	GO:0016021		-1.47921626656338	0.00249087208989309
Cc08_g15040	GSCOC_T00035426001	A0A068UUV9	Putative E3 ubiquitin-protein ligase RHA1B	GO:0016021;GO:0008270		-1.47078832958295	0.00153348861111899
Cc01_g10810	GSCOC_T00024188001	A0A068UF07	Putative Receptor-like protein 12	GO:0016021		-1.46482139353078	0.0031857212493148
Cc02_g39240	GSCOC_T00027745001	A0A068UJL4	Cyclic nucleotide-gated ion channel 1	GO:0016021;GO:0005216		-1.44072570999798	0.00342951387203454
Cc10_g03020	GSCOC_T00024817001	A0A068UGX9	Protein of unknown function (DUF1195)	GO:0016021		-1.43226805776898	0.00020877979699837
Cc11_g08090	GSCOC_T00032922001	A0A068TX05	Protein PLANT CADMIUM RESISTANCE 2	GO:0016021		-1.41813881553832	0.000703100412774183
Cc02_g05740	GSCOC_T00039090001	A0A068V220	Putative Serine/threonine-protein phosphatase 6 regulatory ankyrin repeat subunit B			-1.41765422407202	0.00441165588869096
Cc08_g08860	GSCOC_T00017220001	A0A068V891	Putative Dehydration-responsive protein RD22		AT5G25610	-1.40887663090037	0.00839667692481727
Cc07_g09850	GSCOC_T00037190001	A0A068U1D8	Mannan endo-1,4-beta-mannosidase 7	GO:0004553;GO:0005975	AT5G66460	-1.39491280947117	0.00420632949463777
Cc08_g00130	GSCOC_T00005568001	A0A068VGI3	Probable receptor-like protein kinase At1g80640	GO:0016021;GO:0005524;GO:0004674	AT1G80640	-1.3877870579262	0.00121168824005177
Cc05_g14830	GSCOC_T00038773001	A0A068V1J1	Zinc transporter 2	GO:0016021;GO:0046873		-1.37784822432552	0.000184546562400872
Cc02_g07020	GSCOC_T00039258001	A0A068V080	Probable sugar phosphate/phosphate translocator At5g04160	GO:0016021		-1.3747770865665	0.00157093794873186
Cc09_g09670	GSCOC_T00004089001	A0A068V9X2	S-adenosyl-L-methionine-dependent methyltransferases superfamily protein	GO:0005768;GO:0005886;GO:0005802;GO:0008168		-1.37463130196584	0.00233990944980126
Cc05_g00060	GSCOC_T00017022001	A0A068V5H2	Scarecrow-like protein 23		AT5G41920	-1.3731301457938	0.00971635257838504
Cc07_g04730	GSCOC_T00039730001	A0A068U425	Probable galacturonosyltransferase 9	GO:0005768;GO:0000139;GO:0016021;GO:0005802;GO:0047262;GO:0071555;GO:0045489		-1.34505000497567	0.00772649159250441
Cc05_g03640	GSCOC_T00017361001	A0A068V669	Putative uncharacterized protein			-1.34391165518428	0.00320028894047504
Cc00_g31430	GSCOC_T00005975001	A0A068VMH9	Uncharacterized protein			-1.3404523133098	0.00651508261349197
Cc08_g10610	GSCOC_T00027033001	A0A068UIB0	Zinc transporter 4, chloroplastic	GO:0016021;GO:0005385		-1.33426975337709	0.00294691241813818
Cc11_g08030	GSCOC_T00032930001	A0A068TX67	Putative Protein TIFY 6B			-1.32866533034011	0.004413106913765
Cc10_g03170	GSCOC_T00024839001	A0A068UGZ7	Nucleotide-diphospho-sugar transferase family protein	GO:0000139;GO:0016757;GO:0071555		-1.32779222139892	0.00698273676618921
Cc07_g18820	GSCOC_T00018688001	A0A068U7W8	Probable methyltransferase PMT26	GO:0016021;GO:0008168		-1.32179850787671	0.00299767811329298
Cc06_g07310	GSCOC_T00031280001	A0A068UPP6	5-methyltetrahydropteroyltriglutamate--homocysteine methyltransferase	GO:0003871;GO:0008270;GO:0009086		-1.31401830091202	6.72464102514083e-05
Cc07_g11070	GSCOC_T00037042001	A0A068U0L8	Rac-like GTP-binding protein RHO1	GO:0045177;GO:0005730;GO:0009524;GO:0005819;GO:0005525;GO:0032794;GO:0003924;GO:0051650;GO:0009860;GO:0030834;GO:0030833;GO:0017157;GO:0007264		-1.29331326589628	0.000446045811083468
Cc11_g05890	GSCOC_T00020564001	A0A068UAH3	Probable xyloglucan endotransglucosylase/hydrolase protein 27	GO:0048046;GO:0005618;GO:0004553;GO:0016762;GO:0071555;GO:0006073	AT1G14720	-1.29045254071999	0.00845645081922489
Cc10_g10420	GSCOC_T00010113001	A0A068VDV3	Uncharacterized membrane protein At4g09580	GO:0016021		-1.28572631024735	0.00230857211217176
Cc06_g03010	GSCOC_T00023571001	A0A068UDL4	Soluble inorganic pyrophosphatase	GO:0005737;GO:0004427;GO:0000287;GO:0006796		-1.28018663958402	0.00815684616536646
Cc07_g10580	GSCOC_T00037097001	A0A068U076	GDP-mannose 4,6 dehydratase 2	GO:0008446;GO:0019673	AT3G51160	-1.27880135923696	0.00960948964370721
Cc11_g12270	GSCOC_T00032339001	A0A068TWH7	Putative Probable leucine-rich repeat receptor-like protein kinase At1g35710			-1.2773461663888	0.00241432445535668
Cc03_g01930	GSCOC_T00025824001	A0A068TSC3	Xyloglucan 6-xylosyltransferase	GO:0016021;GO:0016757		-1.27244901394513	0.00408543379066581
Cc09_g07580	GSCOC_T00036236001	A0A068UWA3	Tubulin beta-3 chain	GO:0005737;GO:0005874;GO:0005525;GO:0003924;GO:0005200;GO:0007017	AT5G23860	-1.26673658032752	0.00219478628845661
Cc06_g20970	GSCOC_T00015836001	A0A068V550	Succinate dehydrogenase [ubiquinone] iron-sulfur subunit 2, mitochondrial	GO:0005743;GO:0051537;GO:0051538;GO:0051539;GO:0009055;GO:0046872;GO:0008177;GO:0006099		-1.24610387753557	0.00722627786888993
Cc03_g02290	GSCOC_T00025870001	A0A068TRG8	CASP-like protein POPTRDRAFT_820933	GO:0016021;GO:0005886	AT3G06390	-1.2429763040104	0.000765388937332113
Cc03_g05800	GSCOC_T00026349001	A0A068TSQ9	Long-chain-alcohol oxidase FAO1	GO:0016020;GO:0050660;GO:0046577	AT3G23410	-1.23581598428272	0.00902154622805723
Cc06_g11990	GSCOC_T00041588001	A0A068U4M4	Stress responsive alpha-beta barrel domain protein		AT2G31670	-1.22363679178746	0.00262592118599545
Cc02_g01990	GSCOC_T00020041001	A0A068U967	Probable inactive receptor kinase At4g23740	GO:0016021;GO:0005524;GO:0004672	AT4G23740	-1.21662486436639	0.00803755244188814
Cc10_g07770	GSCOC_T00034481001	A0A068TYJ6	Uncharacterized protein At3g49720	GO:0016021		-1.213219012789	0.00772649159250441
Cc10_g12140	GSCOC_T00031905001	A0A068UQV7	Putative Aspartic proteinase Asp1	GO:0004190		-1.17165654382998	0.00129284070564325
Cc11_g17080	GSCOC_T00038264001	A0A068UYH3	Protein of unknown function (DUF 3339)	GO:0016021		-1.15496567269391	0.0034497357029498
Cc04_g10890	GSCOC_T00042664001	A0A068V365	Leucine-rich repeat receptor-like serine/threonine/tyrosine-protein kinase SOBIR1	GO:0016021;GO:0005524;GO:0004672	AT2G31880	-1.14707439173008	0.00928822977190292
Cc06_g16920	GSCOC_T00004148001	A0A068VDM4	Guanylate kinase	GO:0004385		-1.14494355337238	0.00245701867037862
Cc09_g05850	GSCOC_T00033403001	A0A068UUI5	unknown protein; BEST Arabidopsis thaliana protein match is	GO:0016021		-1.01227540137316	0.00966394043603506

## Sheet: Up-regulated
Gene ID	ORF Name	Uniprot acession	Protein Name	GO Terms	TAIR	Log2FC	FDR
Cc05_g08230	GSCOC_T00016841001	A0A068V5S9	Putative Glycoside hydrolase family 79, N-terminal	GO:0016021;GO:0016798	AT5G34940	21.2349202548655	9.86683558392415e-05
Cc03_g06560	GSCOC_T00026456001	A0A068TTG3	Putative Transcription factor MYB48	GO:0003677	AT5G59780	8.01948176779391	5.73479653995206e-05
Cc07_g18370	GSCOC_T00018761001	A0A068U858	Predicted protein			7.05476368794273	0.0058484101734612
Cc11_g04480	GSCOC_T00004798001	A0A068VNA2	18.5 kDa class I heat shock protein		AT5G59720	6.67796371062232	8.44128754999407e-05
Cc00_g26020	GSCOC_T00004769001	A0A068VKZ4	ribonuclease Ps	GO:0005655;GO:0000172;GO:0001682		6.31340187535856	0.00868819851845295
Cc07_g13110	GSCOC_T00036787001	A0A068U241	Putative Ethylene-responsive transcription factor 15	GO:0005634;GO:0003677;GO:0003700	AT3G23240	6.27598916739596	5.85163799155034e-05
Cc11_g04470	GSCOC_T00004798001	A0A068VNA2	18.5 kDa class I heat shock protein		AT5G59720	6.12897849029548	1.76314377209401e-05
Cc02_g23670	GSCOC_T00015069001	A0A068TQM6	22.7 kDa class IV heat shock protein		AT4G10250	6.10889822291168	8.74991179076574e-06
Cc04_g05250	GSCOC_T00022272001	A0A068TQP9	Heat shock 70 kDa protein	GO:0005524	AT3G12580	6.04833305174726	1.07545480857524e-18
Cc00_g04790	GSCOC_T00007997001	A0A068VC85	Hypothetical protein			5.9933739852791	0.00464624294933025
Cc00_g09960	GSCOC_T00013628001	A0A068VIG7	Putative disease resistance protein RGA3	GO:0043531;GO:0006952		5.9772594190037	0.00435386187453522
Cc01_g10130	GSCOC_T00024094001	A0A068UH90	Histone H2B.2	GO:0000786;GO:0005634;GO:0003677;GO:0046982	AT1G08170	5.96596573544432	0.00243228355276007
Cc07_g09470	GSCOC_T00037237001	A0A068U118	Hypothetical protein			5.93562801112398	5.12890949041772e-09
Cc11_g16360	GSCOC_T00038174001	A0A068UXN7	Heat shock protein, putative		AT4G27670	5.87546472316181	1.50568818309265e-05
Cc03_g07610	GSCOC_T00026616001	A0A068TTQ9	Putative Predicted protein	GO:0009737		5.75716056762612	1.34745567365089e-06
Cc02_g37700	GSCOC_T00027954001	A0A068UKT2	Putative uncharacterized protein			5.0079072447594	0.000666981782810082
Cc04_g00860	GSCOC_T00021712001	A0A068TN99	Sucrose synthase	GO:0016157;GO:0005985	AT3G43190	4.9105220656038	0.00168491471665991
Cc01_g05270	GSCOC_T00011450001	A0A068VA96	Putative Disease resistance protein RGA2	GO:0043531		4.81242268342269	0.00680254537596802
Cc07_g07330	GSCOC_T00040079001	A0A068U4U6	Putative basic leucine-zipper 6	GO:0003700	AT1G75390	4.78552574332271	8.97917189855543e-05
Cc02_g11220	GSCOC_T00029439001	A0A068TTZ6	Transketolase, chloroplastic	GO:0004802	AT3G60750	4.73952740247634	8.44027355582861e-05
Cc08_g16780	GSCOC_T00035651001	A0A068UX97	Putative uncharacterized protein	GO:0005634;GO:0043565;GO:0006355	AT2G46680	4.54412471739576	3.34133073154097e-05
Cc00_g07820	GSCOC_T00007023001	A0A068VEX9	Putative unknown protein; FUNCTIONS IN	GO:0016021		4.44254213514661	7.9903018636087e-09
Cc07_g21120	GSCOC_T00027217001	A0A068UIL9	Putative uncharacterized protein	GO:0016021;GO:0008113		4.42447565002601	0.00575040849328504
Cc04_g14500	GSCOC_T00040692001	A0A068V398	Ribulose bisphosphate carboxylase/oxygenase activase 1, chloroplastic	GO:0005524	AT2G39730	4.38854325250494	2.0001529956279e-12
Cc04_g09860	GSCOC_T00042517001	A0A068V531	HVA22-like protein d	GO:0016021	AT5G50720	4.29166992535738	2.61822586275978e-14
Cc07_g19670	GSCOC_T00018528001	A0A068U7N7	Putative UTP--glucose-1-phosphate uridylyltransferase	GO:0070569		4.17005354465788	0.000728471159766387
Cc02_g01010	GSCOC_T00019909001	A0A068U9M6	Putative Homeobox-leucine zipper protein ATHB-7	GO:0005634;GO:0043565;GO:0006355	AT2G46680	3.96819736177017	0.000215122009721075
Cc11_g17520	GSCOC_T00038326001	A0A068UY99	Putative Protein of unknown function wound-induced			3.93835412182782	0.00587993762630276
Cc07_g10030	GSCOC_T00037166001	Q1A524	Dehydrin DH1a	GO:0009415	AT3G50980	3.88221402117177	0.00316106359842785
Cc02_g38650	GSCOC_T00027834001	A0A068UKL6	Putative Late embryogenesis abundant (LEA) hydroxyproline-rich glycoprotein family	GO:0016021;GO:0005886		3.63365637053106	0.000191218723667007
Cc01_g01100	GSCOC_T00037984001	A0A068UX86	Putative UDP-glycosyltransferase 85A3		AT1G22380	3.61106552420093	2.54627128473883e-09
Cc04_g04160	GSCOC_T00022136001	A0A068TP88	Lactoylglutathione lyase / glyoxalase I family protein			3.44115266877321	3.79924555913067e-05
Cc03_g01630	GSCOC_T00025782001	A0A068TS98	Putative Protein of unknown function (DUF581)	GO:0000932	AT5G49120	3.38592900358171	1.41033982242876e-06
Cc01_g05230	GSCOC_T00011456001	A0A068VA09	Putative disease resistance protein RGA3	GO:0043531		3.35010616252179	0.00258891364917393
Cc00_g28710	GSCOC_T00011510001	A0A068VLP9	Hypothetical protein			3.33969559003334	9.95735972380876e-16
Cc04_g04190	GSCOC_T00022140001	A0A068TS18	Putative Pentatricopeptide repeat-containing protein At1g52620	GO:0005739;GO:1990825;GO:0032981;GO:0000963;GO:0008380		3.31642604128591	0.00166799287025621
Cc09_g05150	GSCOC_T00007088001	A0A068VCB3	Putative Cytochrome P450 89A2	GO:0016021;GO:0020037;GO:0005506;GO:0004497;GO:0016705	AT1G64900	3.23206367812026	0.00134647475311688
Cc04_g16330	GSCOC_T00035719001	A0A068UV56	Thioredoxin-like 1-2, chloroplastic		AT5G61440	3.1970230920213	0.00299365330061071
Cc05_g08390	GSCOC_T00016860001	A0A068V7Q1	F-box protein ORE9			3.17974843010697	1.54026854981376e-06
Cc02_g37320	GSCOC_T00028008001	A0A068UKQ1	F-box protein PP2-A13	GO:0009611	AT1G12710	3.09834282293787	0.00979546844585333
Cc01_g19020	GSCOC_T00016112001	A0A068U6A9	Heat stress transcription factor A-6b	GO:0042025;GO:0005634;GO:0003700;GO:0043565	AT3G22830	3.03520317630894	2.9499357097334e-05
Cc05_g14290	GSCOC_T00038836001	A0A068UZQ7	Putative uncharacterized protein			2.86305404116183	0.00772649159250441
Cc00_g28410	GSCOC_T00003307001	A0A068VLM4	F-box protein ORE9			2.85662687760686	0.00134647475311688
Cc01_g11900	GSCOC_T00028106001	A0A068UMV9	Probable serine/threonine-protein kinase RLCKVII	GO:0005524;GO:0004674	AT5G02800	2.79779702521779	0.000138364255971716
Cc11_g15830	GSCOC_T00038106001	A0A068UY76	Protein of unknown function (DUF707)			2.78069788175747	0.00382565371369041
Cc06_g03920	GSCOC_T00023692001	A0A068UE60	Putative uncharacterized protein			2.76726099250666	0.00233849087641164
Cc06_g00890	GSCOC_T00023292001	A0A068UFN0	Ferritin-1, chloroplastic	GO:0008199;GO:0004322;GO:0006879;GO:0006826		2.74024388188631	0.000161985868048168
Cc01_g13370	GSCOC_T00028302001	A0A068UKP3	Putative Protein of unknown function (DUF604)	GO:0016021		2.70425846557263	2.55938204090296e-06
Cc08_g15170	GSCOC_T00035443001	A0A068UUU1	Heat shock protein 83	GO:0005524;GO:0051082;GO:0006457	AT5G56000	2.70188712840714	0.000169171477779694
Cc08_g08190	GSCOC_T00007252001	A0A068VC58	Hypothetical protein			2.65293581479088	4.85623408837232e-09
Cc08_g01290	GSCOC_T00038406001	A0A068UYX5	Thermospermine synthase ACAULIS5	GO:0016740;GO:0006596	AT5G19530	2.64783551399624	0.00491222546451559
Cc11_g04730	GSCOC_T00042900001	A0A068V3X4	Cytochrome P450 78A3	GO:0016021;GO:0020037;GO:0005506;GO:0004497;GO:0016705		2.63792421956803	1.40796377761138e-08
Cc06_g08780	GSCOC_T00031087001	A0A068URY1	Putative aspartate-glutamate racemase family	GO:0036361;GO:0006807		2.63467723645265	0.00902154622805723
Cc03_g03680	GSCOC_T00026065001	A0A068TSW5	Heat shock 70 kDa protein 8	GO:0005524;GO:0009408		2.6092816737681	0.00450161110351432
Cc07_g13330	GSCOC_T00036757001	A0A068TZG2	15.7 kDa heat shock protein, peroxisomal	GO:0005782;GO:0006457;GO:0009408;GO:0000302		2.59091222315138	0.00447748490700636
Cc11_g09210	GSCOC_T00032770001	A0A068TZF7	Putative MATE efflux family protein 9	GO:0016021;GO:0015297;GO:0042910		2.58469429336139	0.00329247556841702
Cc07_g10780	GSCOC_T00037074001	A0A068U059	Putative uncharacterized protein			2.54554012762291	9.55444890425993e-06
Cc06_g17740	GSCOC_T00040362001	A0A068V0V3	Glycosyltransferase family 61 protein	GO:0016021;GO:0016757		2.43914384487921	0.00770784421115231
Cc03_g02590	GSCOC_T00025913001	A0A068TRJ8	Sugar transporter ERD6-like 16	GO:0016021;GO:0022857	AT5G18840	2.41485094955534	0.00615110898141934
Cc06_g20220	GSCOC_T00022935001	A0A068UCQ0	Probable nitrite transporter At1g68570	GO:0016021;GO:0022857	AT1G68570	2.3937371422759	0.0042854638014045
Cc09_g06360	GSCOC_T00011296001	A0A068VED9	Putative Flavonoid 3'-monooxygenase	GO:0020037;GO:0005506;GO:0016705		2.37062995063362	0.00206015275821483
Cc11_g09060	GSCOC_T00032793001	A0A068TZG5	RING/FYVE/PHD zinc finger superfamily protein	GO:0016021;GO:0008270		2.30166600770037	0.00766124313928541
Cc08_g08180	GSCOC_T00007253001	A0A068VCG3	Putative RING finger and CHY zinc finger domain-containing protein 1	GO:0008270		2.30163900693382	0.000225174466136239
Cc05_g04780	GSCOC_T00035013001	A0A068UTD2	Putative Protein TRANSPARENT TESTA 12	GO:0016021;GO:0015297;GO:0042910		2.29169870313006	0.000344670390943294
Cc08_g14340	GSCOC_T00030236001	A0A068UMM5	tetraspanin10	GO:0016021	AT1G63260	2.27868116823836	0.00252771395670453
Cc02_g20060	GSCOC_T00014607001	A0A068TMS5	ethylene-dependent gravitropism-deficient and yellow-green-like 3	GO:0016021		2.27581348843423	0.000721899479212038
Cc03_g09300	GSCOC_T00042688001	A0A068V3H3	Putative UDP-glycosyltransferase 75D1	GO:0008194	AT4G15550	2.25794719055237	5.06153217923715e-05
Cc04_g03650	GSCOC_T00022062001	A0A068TQ86	Cyclin-A2-1	GO:0042025		2.19463086270468	0.00369028319214613
Cc07_g12670	GSCOC_T00036845001	A0A068U0A6	Hypothetical protein			2.1902019157103	2.80704225194936e-09
Cc03_g09380	GSCOC_T00042677001	A0A068V3M4	Probable acyl-activating enzyme 16, chloroplastic	GO:0003824		2.17291739017639	0.00711206588288335
Cc00_g09950	GSCOC_T00013623001	A0A068VFU3	Putative disease resistance protein RGA4			2.16249674892106	0.00408569332998511
Cc00_g04190	GSCOC_T00006614001	A0A068VCK3	60S ribosomal protein L10-2	GO:0005840;GO:0003735;GO:0006412	AT1G26910	2.14577097837981	0.00585454863782651
Cc00_g28960	GSCOC_T00002176001	A0A068VPD5	Cytochrome P450 71A8	GO:0020037;GO:0005506;GO:0004497;GO:0016705		2.1331198312366	0.000366158504091675
Cc04_g12840	GSCOC_T00003258001	A0A068VDL8	Putative U-box domain-containing protein 19	GO:0004842	AT1G60190	2.10086460954942	2.9499357097334e-05
Cc06_g19190	GSCOC_T00028971001	A0A068UPK0	Putative Vesicular GABA transporter	GO:0016021	AT2G41190	2.10077687021667	0.00424766508082387
Cc10_g05350	GSCOC_T00034820001	A0A068TYC8	Putative Isoflavone 2'-hydroxylase	GO:0020037;GO:0005506;GO:0004497;GO:0016705		2.07316217465925	0.00772688607240307
Cc02_g33850	GSCOC_T00008629001	A0A068VBC1	Small nuclear ribonucleoprotein family protein	GO:0005829;GO:0005681;GO:0000387		2.03339101809612	0.000180717186653864
Cc06_g10850	GSCOC_T00041727001	A0A068U6K5	Zinc finger CCCH domain-containing protein 49	GO:0046872	AT2G19810	2.01055873279987	0.00681200620577388
Cc04_g04670	GSCOC_T00022199001	A0A068TPP8	Protein TOPLESS	GO:0006355	AT1G15750	1.95172538495302	0.0020681263721433
Cc02_g36450	GSCOC_T00003923001	A0A068VDN8	Putative Cytochrome P450 704C1	GO:0016021;GO:0020037;GO:0005506;GO:0004497;GO:0016705		1.94982320898148	0.00168365281556775
Cc01_g05020	GSCOC_T00028586001	A0A068UM34	Putative uncharacterized protein			1.9293822859876	6.22397648709371e-05
Cc11_g13020	GSCOC_T00032235001	A0A068TWB5	Putative uncharacterized protein	GO:0016021		1.92082955288157	0.00774720929560065
Cc04_g08180	GSCOC_T00022670001	A0A068TR80	Probable phosphatidylinositol 4-kinase type 2-beta At1g26270		AT2G03890	1.9155623785653	0.00651508261349197
Cc02_g00910	GSCOC_T00019892001	A0A068U9L7	Small heat shock protein, chloroplastic		AT4G27670	1.91231598039547	0.00734863998551566
Cc08_g14560	GSCOC_T00030207001	A0A068UQ88	Glutathione S-transferase T1			1.90961758473684	0.00677419767159333
Cc01_g07640	GSCOC_T00015431001	A0A068V435	Transcription factor LHW	GO:0005634;GO:0003700;GO:0046983;GO:0010078;GO:0045893;GO:0010479;GO:0010089	AT2G27230	1.89994467244616	0.000141530821934807
Cc05_g15390	GSCOC_T00038698001	A0A068UZH0	1,4-alpha-glucan-branching enzyme 3, chloroplastic/amyloplastic	GO:0003844;GO:0005978		1.89317708085005	0.00677419767159333
Cc10_g02080	GSCOC_T00024704001	A0A068UII2	PLC-like phosphodiesterases superfamily protein	GO:0008081;GO:0006629		1.87043844968047	0.00633917496254263
Cc00_g33560	GSCOC_T00010573001	A0A068VQN4	Hypothetical protein			1.86671586548252	0.00146049374987202
Cc03_g05220	GSCOC_T00026270001	A0A068TV64	1-aminocyclopropane-1-carboxylate oxidase homolog		AT1G06620	1.83281751982036	0.00704060885234273
Cc03_g15450	GSCOC_T00026825001	A0A068UKG1	Putative Disease resistance protein RGA2	GO:0043531;GO:0006952		1.82433315999204	0.00949614788753813
Cc04_g13390	GSCOC_T00018295001	A0A068V6L1	Putative Calmodulin binding protein-like	GO:0005516		1.79723646119626	0.0038212455353855
Cc05_g10180	GSCOC_T00021492001	A0A068UC85	Putative Chitobiosyldiphosphodolichol beta-mannosyltransferase	GO:0000030		1.79713970072904	0.00751534652740593
Cc01_g12280	GSCOC_T00028159001	A0A068UKJ2	Transcription factor MYB48	GO:0003677		1.76355482059638	0.000574340809277961
Cc05_g10820	GSCOC_T00021394001	A0A068UCP3	Probable leucine-rich repeat receptor-like serine/threonine-protein kinase At3g14840	GO:0016021;GO:0005524;GO:0004672		1.76232576601191	0.000130420307434126
Cc10_g09580	GSCOC_T00031525001	A0A068UR20	Putative Cysteine proteinase inhibitor CPI-4	GO:0004869		1.7528450521078	0.00440401001695489
Cc02_g21570	GSCOC_T00014800001	A0A068TQ09	Hypothetical protein	GO:0003723		1.73808317486355	0.00145402015465464
Cc00_g05920	GSCOC_T00004279001	A0A068VGG2	Putative uncharacterized protein	GO:0005524	AT1G05490	1.73005747134819	0.000144342013291715
Cc04_g10090	GSCOC_T00042546001	A0A068V2X5	Putative unknown protein; BEST Arabidopsis thaliana protein match is			1.70705783142015	0.000561668710900329
Cc02_g11810	GSCOC_T00029369001	A0A068TU06	Aldolase-type TIM barrel family protein	GO:0003824;GO:0010286;GO:0010608		1.67708783738812	0.000269982091840676
Cc00_g14670	GSCOC_T00013421001	A0A068VK28	Putative Flavonoid 3'-monooxygenase	GO:0020037;GO:0005506;GO:0004497;GO:0016705		1.67504104113163	0.00356017401608328
Cc03_g00500	GSCOC_T00025632001	A0A068TR91	Beta-glucosidase-like SFR2, chloroplastic	GO:0004553;GO:0005975		1.67334791974187	0.00174645763244281
Cc07_g03570	GSCOC_T00039597001	A0A068U1T7	NAC domain-containing protein 100	GO:0005634;GO:0003677;GO:0006355	AT5G61430	1.67015541097309	0.00681200620577388
Cc01_g12240	GSCOC_T00028154001	A0A068UL00	Riboflavin biosynthesis protein ribBA, chloroplastic	GO:0009507;GO:0008686;GO:0003935;GO:0009231		1.66781391207897	0.00565015304725178
Cc02_g05730	GSCOC_T00039089001	A0A068V055	Putative Sister chromatid cohesion 1 protein 1	GO:0008278;GO:0010032;GO:0051754;GO:0051455		1.66413908018795	0.00544853883493531
Cc02_g26970	GSCOC_T00025008001	A0A068UHH5	Callose synthase 2	GO:0000148;GO:0016021;GO:0003843;GO:0006075	AT2G31960	1.64753865564768	0.000462940337343079
Cc02_g23440	GSCOC_T00015039001	A0A068TMS4	Hypothetical protein			1.62583716686144	0.00254641635354794
Cc01_g09880	GSCOC_T00024058001	A0A068UH65	Splicing factor U2af small subunit A	GO:0089701;GO:0046872;GO:0003723;GO:0000398		1.5527129825845	0.00700953031355285
Cc04_g02330	GSCOC_T00021903001	A0A068TPH5	Hypothetical protein			1.54080904369425	0.00685452105084096
Cc02_g13390	GSCOC_T00029165001	A0A068TW08	Putative Probable ubiquitin-conjugating enzyme E2 24		AT2G33770	1.5181973346769	0.00134647475311688
Cc01_g10690	GSCOC_T00024174001	A0A068UFU9	Putative Protein of unknown function DUF926	GO:0003682		1.50914563500555	0.00152574119665391
Cc08_g12090	GSCOC_T00030529001	A0A068UN76	Putative UPF0676 protein C1494.01	GO:0046872;GO:0016491		1.49933234884239	0.00329247556841702
Cc06_g22050	GSCOC_T00017139001	A0A068V6E2	Putative Cytochrome P450 83B1	GO:0020037;GO:0005506;GO:0004497;GO:0016705		1.48826592974613	0.00651508261349197
Cc09_g06410	GSCOC_T00011304001	A0A068VEE3	Putative Cytochrome P450 71A1	GO:0020037;GO:0005506;GO:0004497;GO:0016705		1.47234148733669	0.0098221339576678
Cc07_g09170	GSCOC_T00040313001	A0A068U3D4	G-box-binding factor 1	GO:0003700		1.458388545646	0.00791919682114536
Cc09_g01500	GSCOC_T00017800001	A0A068U9X8	unknown protein; LOCATED IN			1.44922751060277	9.7524705108719e-05
Cc06_g15370	GSCOC_T00030837001	A0A068UNX6	Putative Two-component response regulator ARR18	GO:0005634;GO:0003677;GO:0003700;GO:0000160		1.44596973084837	0.00175169959141834
Cc04_g10020	GSCOC_T00042536001	A0A068V3C5	SNF1-related protein kinase regulatory subunit gamma-1	GO:0019887		1.42871442985815	0.000247945258033156
Cc00_g01040	GSCOC_T00015800001	A0A068V5D3	Hypothetical protein			1.3858309064697	0.0098221339576678
Cc08_g06780	GSCOC_T00005816001	A0A068VJ69	Endoribonuclease Dicer homolog 3a	GO:0005524;GO:0003677;GO:0004525;GO:0003723;GO:0031047;GO:0006396		1.38418048790032	0.000407914778932787
Cc09_g08740	GSCOC_T00020853001	A0A068UB17	Auxin response factor 6	GO:0005634;GO:0003677;GO:0009734;GO:0009908;GO:0006355		1.36888359436661	0.000246425508088365
Cc11_g11080	GSCOC_T00032487001	A0A068TW80	Uncharacterized protein			1.35574764219513	0.000767747582086606
Cc06_g02140	GSCOC_T00023458001	A0A068UG03	Putative HemK methyltransferase family member 2	GO:0008168;GO:0003676;GO:0032259		1.34667126597699	0.00544674364435026
Cc07_g13850	GSCOC_T00036687001	A0A068U081	Putative uncharacterized protein	GO:0004491		1.33909213105323	0.000175026043256591
Cc01_g13350	GSCOC_T00028300001	A0A068UNA7	Hypothetical protein	GO:0006397		1.33332269450373	0.00130182786022244
Cc07_g05430	GSCOC_T00039815001	A0A068U499	Putative Protein of unknown function (DUF1162)			1.32707656509272	0.00702638524380613
Cc05_g08720	GSCOC_T00016902001	A0A068V5M8	Hypothetical protein			1.31593558769291	0.00968603138958346
Cc05_g04580	GSCOC_T00031697001	A0A068UR88	Polynucleotidyl transferase, ribonuclease H fold protein with HRDC domain	GO:0008408;GO:0003676;GO:0000166		1.31196622235618	0.0022298880983321
Cc11_g11330	GSCOC_T00032460001	A0A068TW56	Protein PHYLLO, chloroplastic	GO:0009063		1.30017322343242	0.00547197458592419
Cc03_g10880	GSCOC_T00042020001	A0A068V1Y0	Putative Ribosome biogenesis protein bms1	GO:0005634;GO:0005525;GO:0042254		1.28387100724161	0.00797368698217502
Cc02_g01440	GSCOC_T00019967001	A0A068U913	Putative Ribonuclease P protein subunit P38-related			1.2769915846017	0.00947711769490101
Cc07_g12520	GSCOC_T00036862001	A0A068U0B7	Putative Uncharacterized protein			1.27153915081874	0.000433683283703659
Cc04_g02490	GSCOC_T00021921001	A0A068TRH2	Putative Poly(A) polymerase beta	GO:0016021;GO:0004652;GO:0003723;GO:0031123;GO:0043631		1.22888712139754	0.00542700550334519
Cc11_g00280	GSCOC_T00019457001	A0A068V7W9	Putative Protein of unknown function (DUF1162)			1.21017760706073	0.00679611319020107
Cc08_g01550	GSCOC_T00038369001	A0A068V0L1	pleckstrin homology (PH) domain-containing protein	GO:0005794;GO:0009506;GO:0005773		1.19917219045523	0.00535655183073767
Cc04_g00080	GSCOC_T00021606001	A0A068TP05	P-loop containing nucleoside triphosphate hydrolases superfamily protein			1.19896783489214	0.00902154622805723
Cc02_g23190	GSCOC_T00015003001	A0A068TMP3	Putative uncharacterized protein	GO:0003723		1.18358501131018	8.63273981615719e-05
Cc01_g10330	GSCOC_T00024121001	A0A068UHB2	Domain of unknown function (DUF966)	GO:0005886		1.1763796382931	0.00677419767159333
Cc04_g11270	GSCOC_T00037297001	A0A068UWU8	Cytochrome P450 71A8	GO:0016021;GO:0020037;GO:0005506;GO:0016705		1.1688284466022	0.00602935418883175
Cc04_g00930	GSCOC_T00021721001	A0A068TP56	Putative Dormancy/auxin associated family protein			1.15201209582491	0.00145686414423793
Cc03_g03500	GSCOC_T00026040001	A0A068TRY8	Cyclin T1	GO:0042025;GO:0016538;GO:0006357		1.14761204731444	0.00515659752011384
Cc11_g04410	GSCOC_T00004785001	A0A068V8Y4	Pyridine nucleotide-disulfide oxidoreductase domain-containing protein 2	GO:0005739;GO:0005507;GO:0016491		1.13924900285239	0.00252771395670453
Cc02_g22510	GSCOC_T00014923001	A0A068TNF5	Uncharacterized protein At1g10890			1.12886598146305	0.00796770363516256
Cc07_g11740	GSCOC_T00036965001	A0A068TZV1	Putative Phosphatidylinositide phosphatase SAC1	GO:0016021;GO:0052866		1.11780952478537	0.00303757871241225
Cc02_g04290	GSCOC_T00020340001	A0A068U9W1	Hypothetical protein			1.11319963508159	0.00606653019632253
Cc09_g09470	GSCOC_T00017124001	A0A068V5P5	Putative RNA-binding protein	GO:0005634;GO:1990904;GO:0003723;GO:0006396		1.10674542250199	0.00254641635354794
Cc08_g05800	GSCOC_T00024371001	A0A068UFH9	Nudix hydrolase 3	GO:0016787		1.10631266860198	0.00373028267421128
Cc11_g11420	GSCOC_T00032447001	A0A068TWQ3	Putative Heat shock protein 90	GO:0005524;GO:0051082;GO:0006457		1.10535616620401	0.00969934114405687
Cc03_g03490	GSCOC_T00026039001	A0A068TRT9	Putative uncharacterized protein	GO:0042025;GO:0016538;GO:0006357	AT4G19600	1.07612838337997	0.00424766508082387
Cc07_g09390	GSCOC_T00037249001	A0A068U0H1	Putative RNA-binding (RRM/RBD/RNP motifs) family protein	GO:0005634;GO:0030619;GO:0000398		1.05996624936837	0.00998637865941873
Cc07_g04190	GSCOC_T00039671001	A0A068U2B7	Protein RIK	GO:0005634;GO:0003723		1.05606256825696	0.00189165154433236
Cc06_g21130	GSCOC_T00034077001	A0A068UT06	Putative Digestive organ expansion factor homolog	GO:0005634		1.05320352225045	0.00633917496254263
Cc01_g16020	GSCOC_T00016492001	A0A068U709	Putative Aminotransferase-like, plant mobile domain family protein			1.04924436395335	0.00679611319020107
Cc11_g15720	GSCOC_T00038090001	A0A068UXV9	Hypothetical protein			1.0406707203937	0.00256272080715485
Cc00_g08170	GSCOC_T00000291001	A0A068VHV6	Putative Heat shock protein 90	GO:0005618;GO:0009570;GO:0005739;GO:0005524;GO:0051082;GO:0006457		1.00221086146227	0.00575040849328504
