# Supplementary material for: Understanding the Impact of Drought in Coffea Genotypes: Transcriptomic Analysis Supports a Common High Resilience to Moderate Water Deficit but a Genotype Dependent Sensitivity to Severe Water Deficit
Source: MDPI journal article supplement (doi:10.3390/agronomy11112255), 2021-11-08
Supplement: s1 [file s1 › Table_S6.xlsx]

## Sheet: Down-regulated
Gene ID	ORF Name	Uniprot acession	Protein Name	GO Terms	TAIR	Log2FC	FDR
Cc02_g17500	GSCOC_T00014268001	A0A068TLC8	Hypothetical protein		AT4G39250	-13.9062028265438	0.000306231045229232
Cc08_g04660	GSCOC_T00004723001	A0A068VHH1	Putative Cytosolic sulfotransferase 15	GO:0008146	AT5G07010	-13.3906789810567	9.18341993153314e-22
Cc10_g04590	GSCOC_T00034917001	A0A068TZ40	Putative Subtilisin-like protease	GO:0004252	AT2G05920	-13.3441493603652	2.92313912535232e-22
Cc01_g11300	GSCOC_T00024256001	A0A068UEY8	Fasciclin-like arabinogalactan protein 11		AT5G03170	-13.2036816391348	0.00140732776403419
Cc03_g09190	GSCOC_T00042703001	A0A068V5H0	Probable xyloglucan endotransglucosylase/hydrolase protein 16	GO:0048046;GO:0005618;GO:0004553;GO:0016762;GO:0071555;GO:0006073	AT3G23730	-12.8690151392095	1.50019026789659e-20
Cc07_g07560	GSCOC_T00040106001	A0A068U2B1	Probable xyloglucan endotransglucosylase/hydrolase protein 6	GO:0048046;GO:0005618;GO:0016021;GO:0004553;GO:0016762;GO:0042546;GO:0071555;GO:0009414;GO:0010411	AT5G65730	-12.8582357416392	1.96210329832713e-54
Cc02_g16500	GSCOC_T00014143001	A0A068TL45	Hypothetical protein		AT4G38770	-12.4532061076456	0.0027702579849879
Cc03_g07230	GSCOC_T00026566001	A0A068TTV1	Probable pectate lyase 15	GO:0016021;GO:0046872;GO:0030570;GO:0045490	AT4G13710	-12.0999889015592	0.00590310842173547
Cc04_g02380	GSCOC_T00021909001	A0A068TPI1	GDSL esterase/lipase APG	GO:0016788	AT3G16370	-11.6392596826623	1.04510532169855e-05
Cc00_g31960	GSCOC_T00012136001	A0A068VME0	COBRA-like protein 4	GO:0031225;GO:0010215	AT5G15630	-11.5843831989064	0.00652078183697682
Cc01_g16260	GSCOC_T00016463001	A0A068U5W6	Hypothetical protein			-11.464180954536	1.45381475461925e-16
Cc11_g14560	GSCOC_T00032042001	A0A068TXY9	Probable xyloglucan endotransglucosylase/hydrolase protein 33	GO:0048046;GO:0005618;GO:0005887;GO:0004553;GO:0016762;GO:0042546;GO:0009831;GO:0010411		-11.2834251293876	4.34396801725366e-16
Cc06_g01620	GSCOC_T00023390001	A0A068UDD6	Laccase-4	GO:0048046;GO:0005507;GO:0052716;GO:0046274	AT2G38080	-11.2720750696205	0.00285091875350126
Cc11_g16200	GSCOC_T00038155001	A0A068UYG3	Probable pectate lyase 5	GO:0046872;GO:0030570;GO:0045490	AT1G67750	-11.090686485255	0.00302120295359233
Cc03_g13740	GSCOC_T00031729001	A0A068UQX5	Putative Polygalacturonase-1 non-catalytic subunit beta			-11.0879065400769	1.65813943257763e-14
Cc10_g15770	GSCOC_T00033771001	A0A068UV32	Putative Protein ASPARTIC PROTEASE IN GUARD CELL 1	GO:0004190;GO:0043067	AT1G09750	-10.9435512578929	0.000246726981095979
Cc06_g03600	GSCOC_T00023646001	A0A068UEW8	Probable beta-1,4-xylosyltransferase IRX9	GO:0000139;GO:0016021;GO:0015018;GO:0042285;GO:0071555;GO:0010417;GO:0009834		-10.9298758373763	0.00763083339549699
Cc06_g01530	GSCOC_T00023375001	A0A068UDZ3	Glycerol-3-phosphate acyltransferase 6	GO:0016021;GO:0016746	AT2G38110	-10.8366296255387	1.95985260236147e-11
Cc07_g15160	GSCOC_T00036511001	A0A068U1H4	Putative uncharacterized protein	GO:0016021		-10.688564850631	1.12155170270352e-11
Cc05_g05510	GSCOC_T00035120001	A0A068UW58	Xyloglucan endotransglucosylase/hydrolase protein 9	GO:0048046;GO:0005618;GO:0004553;GO:0016762;GO:0042546;GO:0071555;GO:0010411	AT4G03210	-10.6400299028908	6.97426879940903e-13
Cc08_g04410	GSCOC_T00034266001	A0A068UU58	Hypothetical protein			-10.6338135469549	1.10706145020648e-16
Cc06_g04770	GSCOC_T00043000001	A0A068V3F5	Putative PLATZ transcription factor family protein			-10.5957792247729	3.08940306262716e-13
Cc01_g10980	GSCOC_T00024214001	A0A068UHI1	Uncharacterized membrane protein At1g06890	GO:0016021	AT2G28315	-10.5547890523236	0.00307842400212966
Cc03_g15230	GSCOC_T00026792001	A0A068UHX6	Probable leucine-rich repeat receptor-like protein kinase At5g49770	GO:0016021;GO:0005524;GO:0004674	AT5G49770	-10.5138038370527	0.001079418044641
Cc03_g03610	GSCOC_T00026054001	A0A068TSL7	Thermospermine synthase ACAULIS5	GO:0016740;GO:0006596		-10.4532407241416	2.11822280586377e-10
Cc02_g16790	GSCOC_T00014174001	A0A068TKX6	Auxin-induced protein 15A	GO:0009733	AT4G34760	-10.3783447793183	1.74191788506784e-10
Cc07_g11210	GSCOC_T00037027001	A0A068U2L6	Peroxidase 64	GO:0005576;GO:0020037;GO:0046872;GO:0004601;GO:0042744;GO:0006979	AT5G42180	-10.3741100346881	0.00180364360946345
Cc11_g16080	GSCOC_T00038139001	A0A068UY91	Putative CONTAINS InterPro DOMAIN/s	GO:0010088	AT3G01680	-10.3725362627067	8.17683805142814e-14
Cc06_g12890	GSCOC_T00041479001	A0A068U4D1	Hypothetical protein			-10.2846633381792	8.56664312996044e-12
Cc02_g19540	GSCOC_T00014522001	A0A068TLR5	Hypothetical protein			-10.2828128578676	1.71110490895939e-05
Cc07_g12480	GSCOC_T00036867001	A0A068TZS1	Probable acyl-activating enzyme 6	GO:0003824	AT5G16340	-10.2603310986191	1.11467891990392e-11
Cc04_g05320	GSCOC_T00022281001	A0A068TPV3	Putative Protein ASPARTIC PROTEASE IN GUARD CELL 2	GO:0004190	AT5G10770	-10.2231302974677	2.63803947840639e-09
Cc04_g07330	GSCOC_T00022544001	A0A068TQY3	Putative Protein ASPARTIC PROTEASE IN GUARD CELL 1	GO:0004190;GO:0009737;GO:0009414	AT3G18490	-10.185716305369	0.00452994954762751
Cc08_g14880	GSCOC_T00035399001	A0A068UWM4	Cytochrome P450 86A2	GO:0020037;GO:0005506;GO:0004497;GO:0016705	AT4G00360	-10.1485216508106	3.45459610170903e-10
Cc05_g02500	GSCOC_T00020945001	A0A068UDN1	GDSL esterase/lipase At2g04570	GO:0016788	AT2G04570	-10.065519103949	9.60885559454725e-07
Cc00_g17860	GSCOC_T00008903001	A0A068VI29	Probable polygalacturonase	GO:0004650;GO:0005975		-9.92822975330259	8.52407094827654e-10
Cc07_g06260	GSCOC_T00039925001	A0A068U1X5	Protein of unknown function (DUF579)	GO:0016021;GO:0045492	AT5G67210	-9.78903895178423	3.23764388022327e-07
Cc02_g14630	GSCOC_T00013881001	A0A068TLG8	Putative FUNCTIONS IN	GO:0008017;GO:0043622;GO:0048446		-9.70593224919604	1.03068281723966e-11
Cc05_g13200	GSCOC_T00021094001	A0A068UC92	Probable galacturonosyltransferase 12	GO:0000139;GO:0016021;GO:0047262;GO:0071555;GO:0045489		-9.62634421057279	3.84283587638982e-07
Cc02_g05420	GSCOC_T00039050001	A0A068UZQ6	Expansin-A4	GO:0005618;GO:0005576;GO:0016020;GO:0009664	AT2G40610	-9.5163781014032	5.80150018417603e-19
Cc03_g06020	GSCOC_T00026378001	A0A068TVB4	Putative Actin-related protein 2/3 complex subunit 2	GO:0005885;GO:0005737;GO:0003779;GO:0030041;GO:0034314	AT2G33385	-9.51297915584757	1.11712188791087e-06
Cc03_g14380	GSCOC_T00026648001	A0A068UHN6	Polygalacturonase At1g48100	GO:0005576;GO:0004650;GO:0005975;GO:0071555	AT1G48100	-9.50753845881925	5.88052659803403e-09
Cc02_g16370	GSCOC_T00014121001	A0A068TNJ5	Thaumatin-like protein	GO:0016021	AT1G75040	-9.43566684096911	8.29221171679085e-07
Cc02_g28330	GSCOC_T00025208001	A0A068UJL5	Protein of unknown function, DUF642			-9.43294726741712	3.36483486024363e-09
Cc00_g16700	GSCOC_T00010544001	A0A068VKQ7	Putative Foot protein 1 variant 1			-9.41773480636158	8.21899220176442e-14
Cc08_g07730	GSCOC_T00011861001	A0A068VAW1	Hypothetical protein			-9.34803462664172	6.64061539944836e-09
Cc09_g07920	GSCOC_T00003778001	A0A068V9U2	Glutathione S-transferase U15			-9.25565978028156	1.4713376951208e-07
Cc05_g02480	GSCOC_T00020948001	A0A068UB14	GDSL esterase/lipase At2g42990	GO:0016021;GO:0016788	AT2G42990	-9.21894623408429	3.51361253537623e-06
Cc07_g12750	GSCOC_T00036836001	A0A068U0N8	unknown protein; FUNCTIONS IN			-9.20557225034094	2.32469650615045e-07
Cc11_g10950	GSCOC_T00032505001	A0A068TX76	Hypothetical protein			-9.19141128633991	3.56315093706487e-05
Cc09_g09080	GSCOC_T00023109001	A0A068UFC5	Probable purine permease 9	GO:0016021;GO:0015211		-9.16155826557728	4.56538274842295e-06
Cc07_g00690	GSCOC_T00019147001	A0A068V7U4	Putative Mavicyanin	GO:0009055		-9.14181534930871	0.000712551099098252
Cc08_g12940	GSCOC_T00030408001	A0A068UN00	Monocopper oxidase-like protein SKU5	GO:0046658;GO:0048046;GO:0009505;GO:0009506;GO:0005774;GO:0005507;GO:0016491;GO:0009932	AT4G12420	-9.11207759474308	2.98123278925869e-06
Cc02_g03550	GSCOC_T00020242001	A0A068U9W7	Peroxidase 66	GO:0005576;GO:0020037;GO:0046872;GO:0004601;GO:0042744;GO:0006979		-9.09615204517535	2.42990139786011e-05
Cc07_g12970	GSCOC_T00036807001	A0A068U085	TPX2 (targeting protein for Xklp2) protein family	GO:0016021;GO:0005874;GO:0005819;GO:0032147;GO:0060236		-9.09563072653255	5.73599536130771e-05
Cc03_g03710	GSCOC_T00026070001	A0A068TSM9	Putative uncharacterized protein			-9.05223731210754	7.16122387364506e-07
Cc02_g36510	GSCOC_T00003915001	A0A068VB37	Fasciclin-like arabinogalactan protein 8	GO:0016021	AT2G45470	-9.03927260247081	2.20164752269475e-14
Cc11_g05600	GSCOC_T00020519001	A0A068UB03	Putative CONTAINS InterPro DOMAIN/s	GO:0010088		-9.03562265348872	1.62649763807396e-07
Cc01_g15270	GSCOC_T00016583001	A0A068U789	Expansin-A2	GO:0005618;GO:0005576;GO:0016020;GO:0009664	AT2G40610	-8.99984339771938	7.52864076780476e-05
Cc08_g03840	GSCOC_T00034180001	A0A068UTW4	Hypothetical protein			-8.99363044285442	2.924612750474e-06
Cc00_g15190	GSCOC_T00005655001	A0A068VGY1	Glucan endo-1,3-beta-glucosidase	GO:0004553;GO:0005975		-8.98613945162195	1.14505751508489e-06
Cc01_g09640	GSCOC_T00024027001	A0A068UFI4	Family of unknown function (DUF662) _x0001_			-8.97143399459873	3.00596270734223e-05
Cc04_g04250	GSCOC_T00022147001	A0A068TQE8	Ethylene-responsive transcription factor WIN1	GO:0005634;GO:0003677;GO:0003700	AT1G15360	-8.95741093289316	3.45589962608009e-07
Cc11_g04900	GSCOC_T00042936001	A0A068V449	Putative Pectinesterase 2	GO:0045330;GO:0004857;GO:0030599;GO:0042545;GO:0045490		-8.92608563460479	7.40620862596184e-07
Cc08_g02860	GSCOC_T00037785001	A0A068UWW0	Hypothetical protein			-8.91465618970669	7.94507124242201e-05
Cc06_g18950	GSCOC_T00028934001	A0A068UMQ3	Putative Strictosidine synthase 3	GO:0016844;GO:0009058		-8.91236096797463	6.9188004603714e-12
Cc04_g02630	GSCOC_T00021938001	A0A068TPL2	Putative downstream target of AGL15-4	GO:0016021		-8.89646326935518	2.46498623100029e-07
Cc00_g28800	GSCOC_T00011418001	A0A068VLH5	Putative Isoflavone 7-O-methyltransferase	GO:0008171;GO:0046983;GO:0032259		-8.88074132529916	5.5775575742862e-06
Cc00_g14020	GSCOC_T00010024001	A0A068VH99	3-ketoacyl-CoA synthase 21	GO:0016021;GO:0016747;GO:0006633	AT5G04530	-8.87744526423489	0.000268219034849568
Cc00_g24100	GSCOC_T00001080001	A0A068VK34	GDSL esterase/lipase At1g28580	GO:0016788		-8.87336124684483	5.2275473978569e-07
Cc07_g06320	GSCOC_T00039933001	A0A068U2H8	Hypothetical protein	GO:0016021	AT4G06744	-8.86722159750494	7.93466920793207e-18
Cc10_g13450	GSCOC_T00035291001	A0A068UU52	unknown protein; BEST Arabidopsis thaliana protein match is			-8.86189496593051	1.08256930311817e-06
Cc01_g01960	GSCOC_T00019276001	A0A068V815	Protein of unknown function (DUF579)	GO:0045492		-8.79013680794598	4.48752234837606e-05
Cc06_g00850	GSCOC_T00023286001	A0A068UDZ5	TRICHOME BIREFRINGENCE-LIKE 34	GO:0016021		-8.78618989231455	0.000433314102242769
Cc11_g15510	GSCOC_T00038065001	A0A068UXH6	Protein of Unknown Function (DUF239)			-8.77880634197989	2.20570025905219e-08
Cc03_g04880	GSCOC_T00026219001	A0A068TTA3	Putative TPX2 (targeting protein for Xklp2) protein family		AT3G23090	-8.77661510016746	1.29206640348353e-06
Cc01_g16270	GSCOC_T00016461001	A0A068U6Y2	Asparagine--tRNA ligase, cytoplasmic 2	GO:0004816;GO:0005524;GO:0006421		-8.76493266679833	4.56006396387626e-07
Cc01_g04940	GSCOC_T00028571001	A0A068ULG5	ABC transporter G family member 15	GO:0016021;GO:0005524;GO:0016887	AT3G21090	-8.76050043818589	4.25348477699289e-05
Cc07_g16350	GSCOC_T00037571001	A0A068UWH0	Putative Cytochrome P450 86B1	GO:0020037;GO:0005506;GO:0004497;GO:0016705	AT1G57750	-8.74943781495622	5.08067965819999e-07
Cc10_g06850	GSCOC_T00034604001	A0A068TXV4	Phosphate-responsive 1 family protein			-8.74718631733617	4.60095935532323e-07
Cc07_g03490	GSCOC_T00039583001	A0A068U265	Expansin-A15	GO:0005618;GO:0005576;GO:0016020;GO:0009664	AT2G03090	-8.73851716585396	5.7624573735842e-10
Cc11_g16790	GSCOC_T00038226001	A0A068V0C4	Probable mannitol dehydrogenase	GO:0016491;GO:0008270		-8.72988467790494	7.76574487850344e-07
Cc02_g15480	GSCOC_T00013996001	A0A068TLN4	Cellulose synthase A catalytic subunit 8 [UDP-forming]	GO:0005618;GO:0016021;GO:0005886;GO:0016760;GO:0046872;GO:0071555;GO:0030244;GO:0042742;GO:0050832;GO:0009834;GO:0006970;GO:0009414	AT4G18780	-8.72870744356075	0.00109888122728466
Cc00_g02690	GSCOC_T00006658001	A0A068VDI7	Putative Subtilisin-like protease	GO:0016021;GO:0004252		-8.7279284952238	5.67687710047837e-07
Cc00_g08520	GSCOC_T00005636001	A0A068VFF6	Putative Cellulose synthase-like protein G3	GO:0016021;GO:0016760;GO:0030244	AT4G23990	-8.72450168978793	1.18763885502743e-27
Cc10_g04890	GSCOC_T00034880001	A0A068TZ21	Putative Cyclin-D3-2	GO:0042025	AT4G34160	-8.71714065433038	6.74176004071488e-06
Cc00_g31330	GSCOC_T00004273001	A0A068VMG8	Putative O-acyltransferase (WSD1-like) family protein	GO:0004144		-8.68038218616064	3.29289382231601e-08
Cc02_g09710	GSCOC_T00029619001	A0A068TUI1	TRICHOME BIREFRINGENCE-LIKE 36		AT3G54260	-8.67855508260598	3.63898457349867e-07
Cc07_g16670	GSCOC_T00037533001	A0A068UYZ0	Hypothetical protein	GO:0008083		-8.66030846707033	9.37902223605797e-07
Cc11_g14360	GSCOC_T00032067001	A0A068TY03	Putative Serine/threonine-protein kinase PBS1	GO:0005524;GO:0004674		-8.61134910502623	9.42975820302496e-06
Cc11_g04910	GSCOC_T00042937001	A0A068V3C2	Probable pectinesterase/pectinesterase inhibitor 40	GO:0045330;GO:0004857;GO:0030599;GO:0042545;GO:0045490	AT4G02320	-8.58046007970714	3.99677518946373e-05
Cc06_g23480	GSCOC_T00040562001	A0A068V1A4	Hypothetical protein			-8.56476917318883	2.00275628852321e-05
Cc00_g01060	GSCOC_T00015884001	A0A068V564	Putative Receptor-like protein kinase FERONIA	GO:0016021		-8.56382518193661	0.000149643592692245
Cc11_g14750	GSCOC_T00032014001	A0A068TW39	Putative Glucan endo-1,3-beta-glucosidase 13	GO:0004553;GO:0005975	AT4G16260	-8.55873019915284	4.23152031482004e-06
Cc10_g01820	GSCOC_T00024670001	A0A068UGJ8	Endoglucanase 24	GO:0016021;GO:0008810;GO:0030245	AT1G19940	-8.54698507078116	0.00229590255841435
Cc01_g02610	GSCOC_T00009674001	A0A068VCD1	Cytochrome P450 71D10	GO:0020037;GO:0005506;GO:0004497;GO:0016705		-8.5395614193468	1.05783687740599e-06
Cc06_g21560	GSCOC_T00001552001	A0A068VAP6	8-hydroxyquercetin 8-O-methyltransferase	GO:0008171;GO:0046983;GO:0032259		-8.52667957440433	9.59766042468144e-05
Cc11_g10730	GSCOC_T00032540001	A0A068TWC4	Probable transmembrane ascorbate ferrireductase 4	GO:0016021;GO:0016491		-8.51641792837549	2.61601102136186e-07
Cc05_g00350	GSCOC_T00017064001	A0A068V6A5	Putative Acidic endochitinase			-8.51171830705938	1.21275633909248e-22
Cc09_g01950	GSCOC_T00017742001	A0A068U9T4	Putative Cytochrome P450 77A3	GO:0005886;GO:0020037;GO:0005506;GO:0004497;GO:0016705	AT5G04660	-8.51096314609884	0.000882532935431042
Cc00_g20150	GSCOC_T00003026001	A0A068VJ32	Putative Predicted protein			-8.49165750547046	3.24900113546836e-06
Cc00_g28840	GSCOC_T00011248001	A0A068VL83	Cellulose synthase-like protein G3	GO:0016021;GO:0016760;GO:0071555;GO:0030244	AT4G23990	-8.4814045751096	4.74282438761501e-17
Cc05_g11370	GSCOC_T00021326001	A0A068UCH9	Plant protein of unknown function (DUF828)	GO:0005794;GO:1990538;GO:0045492		-8.47748667826502	0.00189488404349916
Cc00_g11820	GSCOC_T00007746001	A0A068VJ86	Putative cyclin-D6-1	GO:0042025;GO:0005634;GO:0051726		-8.4248126081028	0.00214522839529853
Cc02_g17170	GSCOC_T00014223001	A0A068TNS4	Beta-galactosidase 3	GO:0004565;GO:0005975	AT4G36360	-8.39867938781865	4.12813838578925e-28
Cc11_g04690	GSCOC_T00042895001	A0A068V5W8	COBRA-like protein 1	GO:0031225;GO:0010215		-8.39252635812297	0.00119520744774677
Cc02_g04140	GSCOC_T00020317001	A0A068U9U7	Putative 21 kDa protein	GO:0004857		-8.37728327778545	0.00570931622801664
Cc08_g00740	GSCOC_T00038473001	A0A068UZ34	Ethylene-responsive transcription factor SHINE 3	GO:0005634;GO:0003677;GO:0003700	AT5G25390	-8.37330807628674	1.09906357494596e-07
Cc02_g36020	GSCOC_T00042760001	A0A068V2Z8	Putative Probable peptide/nitrate transporter At1g59740	GO:0016021;GO:0022857	AT1G59740	-8.35290037615658	1.15256938680913e-06
Cc06_g22070	GSCOC_T00017141001	A0A068V616	Cytochrome P450 83B1	GO:0020037;GO:0005506;GO:0004497;GO:0016705		-8.34068122958992	0.0010939555188753
Cc06_g22950	GSCOC_T00040648001	A0A068V193	Putative Patatin group A-3	GO:0006629		-8.32886551805337	8.15321353278621e-05
Cc09_g04810	GSCOC_T00017378001	A0A068U711	Apyrase	GO:0005524;GO:0016787		-8.32732984469349	4.57213428423389e-05
Cc11_g04790	GSCOC_T00042911001	A0A068V5X5	Auxin-induced protein 15A	GO:0009733	AT5G18050	-8.31611907417003	0.0045366216882829
Cc01_g21490	GSCOC_T00004974001	A0A068V980	Putative unknown protein; BEST Arabidopsis thaliana protein match is	GO:0016021		-8.26918321866105	0.00305847318055066
Cc08_g02380	GSCOC_T00037709001	A0A068UXF3	Ent-kaurenoic acid oxidase 2	GO:0016021;GO:0020037;GO:0005506;GO:0004497;GO:0016705	AT2G32440	-8.24614928366671	2.09001713629822e-16
Cc00_g13740	GSCOC_T00013297001	A0A068VGT5	Probable pectinesterase/pectinesterase inhibitor 12	GO:0045330;GO:0004857;GO:0030599;GO:0042545;GO:0045490;GO:0009617		-8.22025664590375	1.98771232612103e-05
Cc01_g15210	GSCOC_T00016591001	A0A068U674	Putative ovate family protein 17			-8.19425817131213	1.86950523710545e-05
Cc07_g11540	GSCOC_T00036990001	A0A068TZW8	TRICHOME BIREFRINGENCE-LIKE 34	GO:0016021		-8.17564433787398	0.000426644574415401
Cc02_g15400	GSCOC_T00013986001	A0A068TKW0	Probable LRR receptor-like serine/threonine-protein kinase At5g45780	GO:0016021;GO:0005524;GO:0004674		-8.17267088716719	8.75109023340588e-09
Cc10_g06580	GSCOC_T00034636001	A0A068U0I7	Putative Transcription factor bHLH96	GO:0046983	AT1G72210	-8.17023165232145	5.06444883413826e-05
Cc09_g07590	GSCOC_T00036235001	A0A068UVX9	Putative Cytochrome P450 734A1	GO:0016021;GO:0020037;GO:0005506;GO:0004497;GO:0016705		-8.16742305060231	3.09780370388736e-05
Cc02_g05960	GSCOC_T00039117001	A0A068UZI7	Laccase-5	GO:0048046;GO:0005507;GO:0052716;GO:0046274	AT2G40370	-8.16126750096354	0.00303618867811654
Cc04_g14350	GSCOC_T00004340001	A0A068VBU8	Putative unknown protein; BEST Arabidopsis thaliana protein match is	GO:0016021		-8.14980581970548	0.000184353247401325
Cc02_g16550	GSCOC_T00014148001	A0A068TL49	Predicted protein	GO:0016021		-8.14543562064848	3.01089782031422e-05
Cc06_g07530	GSCOC_T00031250001	A0A068US97	Putative Probable flavin-containing monooxygenase 1	GO:0050660;GO:0004499;GO:0050661		-8.13803956761107	0.000146614547266634
Cc10_g12110	GSCOC_T00031898001	A0A068URJ0	Germin-like protein subfamily 1 member 7	GO:0048046;GO:0005618;GO:0030145;GO:0045735		-8.11307917258219	4.93194809214302e-17
Cc11_g10580	GSCOC_T00032559001	A0A068TWE1	Probable galacturonosyltransferase-like 3	GO:0016757	AT1G13250	-8.10964423208662	2.97284166034767e-15
Cc06_g12080	GSCOC_T00041578001	A0A068U3G1	Auxin-binding protein ABP20	GO:0048046;GO:0005618;GO:0030145;GO:0045735	AT5G20630	-8.08986459533553	1.42177168562013e-13
Cc03_g13730	GSCOC_T00031728001	A0A068UQK8	Putative BURP			-8.07236006101692	0.00101727338480157
Cc11_g11470	GSCOC_T00032442001	A0A068TWP8	Putative DNA-3-methyladenine glycosylase	GO:0008725;GO:0006284		-8.06673947240176	0.000140424060994891
Cc10_g02800	GSCOC_T00024789001	A0A068UG09	RAD-like 1	GO:0005634;GO:0003677	AT4G39250	-8.04766870128581	6.02251926606162e-05
Cc02_g17410	GSCOC_T00014253001	A0A068TM33	Laccase-11	GO:0048046;GO:0005507;GO:0052716;GO:0046274		-8.04660316715675	0.00791294713558765
Cc02_g04130	GSCOC_T00020316001	A0A068UAV1	Putative 21 kDa protein	GO:0004857	AT4G25260	-8.0253760117983	6.96175840119917e-14
Cc08_g04710	GSCOC_T00042505001	A0A068V397	Putative TRAF-like family protein			-8.02216990610485	8.95280369109532e-05
Cc00_g07310	GSCOC_T00000204001	A0A068VEL8	Somatic embryogenesis receptor kinase 1			-8.01658163961805	0.000113914196496619
Cc03_g12130	GSCOC_T00015283001	A0A068U5M7	Zinc transporter 5	GO:0016021;GO:0005385	AT1G05300	-8.01475027842763	0.000479345756469945
Cc00_g13760	GSCOC_T00013299001	A0A068VJT3	Pectinesterase/pectinesterase inhibitor PPE8B	GO:0005618;GO:0005576;GO:0045330;GO:0004857;GO:0030599;GO:0042545;GO:0045490		-8.01086557954587	8.52329040376865e-05
Cc07_g07060	GSCOC_T00040040001	A0A068U252	Putative BTB/POZ domain-containing protein At3g49900		AT5G13600	-7.9955109273217	0.000943131011315198
Cc10_g02380	GSCOC_T00024739001	A0A068UIL7	Cytokinin dehydrogenase 5	GO:0019139;GO:0071949;GO:0009690	AT1G75450	-7.9861325398887	3.19968807263647e-19
Cc00_g23340	GSCOC_T00012065001	A0A068VJU3	Putative O-acyltransferase (WSD1-like) family protein	GO:0004144;GO:0045017		-7.98345762603455	0.000351551943168085
Cc06_g13430	GSCOC_T00041399001	A0A068U321	Probable xyloglucan endotransglucosylase/hydrolase protein 23	GO:0048046;GO:0005618;GO:0004553;GO:0016762;GO:0071555;GO:0006073		-7.98247448959151	4.1180406602055e-09
Cc07_g14500	GSCOC_T00036608001	A0A068U014	Putative Transcription factor bHLH96	GO:0046983	AT1G72210	-7.95462457726367	7.03513026020551e-06
Cc00_g18080	GSCOC_T00007955001	A0A068VHU2	Putative Germin-like protein subfamily T member 2	GO:0048046;GO:0005618;GO:0030145;GO:0045735		-7.94606675522451	0.00352017067626145
Cc04_g14780	GSCOC_T00040755001	A0A068V139	Putative Germin-like protein subfamily T member 1	GO:0048046;GO:0005618;GO:0030145;GO:0045735		-7.93803473433118	0.00983299430612348
Cc02_g24560	GSCOC_T00028868001	A0A068UMF2	Putative Metalloendoproteinase 1	GO:0031012;GO:0004222;GO:0008270		-7.93441132570804	0.00633396068305288
Cc03_g07820	GSCOC_T00026646001	A0A068TVU1	Putative uncharacterized protein	GO:0016021		-7.93327400681023	1.47795453036185e-05
Cc10_g15980	GSCOC_T00033803001	A0A068UTD0	Endoglucanase 9	GO:0008810;GO:0030245		-7.92573589784066	0.000154148080823643
Cc05_g10790	GSCOC_T00021397001	A0A068UBV6	TRICHOME BIREFRINGENCE-LIKE 41		AT3G14850	-7.91406617619214	4.53916220352502e-14
Cc00_g22470	GSCOC_T00009593001	A0A068VJX4	COBRA-like protein 4	GO:0031225;GO:0016021;GO:0010215		-7.87964153327652	2.47256141220536e-06
Cc07_g11590	GSCOC_T00036985001	A0A068TZW3	MATE efflux family protein 3, chloroplastic	GO:0016021;GO:0015297;GO:0042910		-7.87311296241529	6.34203877803871e-06
Cc05_g09230	GSCOC_T00002657001	A0A068VDD6	HVA22-like protein f	GO:0016021		-7.82793939366376	0.000208881895097013
Cc05_g07770	GSCOC_T00016779001	A0A068V5D4	NAC domain containing protein 73	GO:0005634;GO:0003677;GO:0006355		-7.82631768759129	0.00054737720270819
Cc04_g10740	GSCOC_T00042644001	A0A068V348	Probable pectate lyase 22	GO:0046872;GO:0030570;GO:0045490	AT5G63180	-7.8249984305743	2.37039517622958e-10
Cc05_g07890	GSCOC_T00016793001	A0A068V7K8	8-hydroxyquercetin 8-O-methyltransferase	GO:0008171;GO:0046983;GO:0032259		-7.8190360217819	1.47144326588351e-15
Cc02_g13400	GSCOC_T00029162001	A0A068TU14	Linoleate 13S-lipoxygenase 3-1, chloroplastic	GO:0046872;GO:0016702;GO:0031408		-7.79512150520961	0.00209205553956707
Cc03_g01620	GSCOC_T00025779001	A0A068TU16	Putative Multidrug and toxin extrusion protein 1	GO:0016021;GO:0015297;GO:0042910		-7.7882606437703	0.00506240415846486
Cc04_g06340	GSCOC_T00022420001	A0A068TSM5	Thaumatin-like protein		AT1G75040	-7.78261571258043	7.09637247994538e-06
Cc04_g03410	GSCOC_T00022035001	A0A068TP00	Putative uncharacterized protein			-7.78225730731151	2.62841737210406e-07
Cc11_g06960	GSCOC_T00020734001	A0A068UD78	RNA-dependent RNA polymerase 1	GO:0003723;GO:0003968;GO:0031047		-7.77528314420861	0.000604217739808657
Cc08_g02950	GSCOC_T00037797001	A0A068UXQ6	Putative Transcription factor bHLH94	GO:0046983	AT1G72210	-7.75587920248202	9.01047588884561e-12
Cc04_g06890	GSCOC_T00022490001	A0A068TST2	Probable non-specific lipid-transfer protein AKCS9	GO:0006869		-7.75431740497862	0.000419296104817976
Cc02_g15730	GSCOC_T00014032001	A0A068TLQ9	unknown protein; FUNCTIONS IN			-7.75382574163361	0.000117968504971608
Cc07_g14490	GSCOC_T00036609001	A0A068TYZ4	Putative uncharacterized protein	GO:0051015;GO:0004553;GO:0030674;GO:0007015;GO:0005975		-7.7282939507536	3.25481280501314e-05
Cc05_g10640	GSCOC_T00021414001	A0A068UBX3	Putative unknown protein; FUNCTIONS IN	GO:0016021		-7.71848307331074	8.59406895790775e-05
Cc08_g04480	GSCOC_T00015634001	A0A068V4K1	Anthocyanin regulatory C1 protein	GO:0005634;GO:0003677	AT2G16720	-7.71822181923735	2.85058168539321e-08
Cc02_g34390	GSCOC_T00000680001	A0A068V9Q9	Putative pectinesterase/pectinesterase inhibitor 22	GO:0045330;GO:0004857;GO:0030599;GO:0042545;GO:0045490	AT3G05620	-7.70699812615054	5.45184764969164e-10
Cc06_g16760	GSCOC_T00004127001	A0A068VG24	Thiol protease SEN102	GO:0008234		-7.7050458065587	0.000887296817394549
Cc03_g09600	GSCOC_T00030944001	A0A068UP28	Putative Transcription factor bHLH77	GO:0046983;GO:0006355	AT3G23690	-7.69991453697767	3.88764744409892e-13
Cc06_g16590	GSCOC_T00030665001	A0A068UR27	Putative alpha/beta-Hydrolases superfamily protein	GO:0016021;GO:0006629		-7.69094810090063	0.000453381054433544
Cc06_g11890	GSCOC_T00041603001	A0A068U4N5	Putative unknown protein; BEST Arabidopsis thaliana protein match is	GO:0009734		-7.68992528268054	0.00378735763373736
Cc11_g05920	GSCOC_T00020568001	A0A068UBB8	Probable transmembrane ascorbate ferrireductase 3	GO:0016021;GO:0016491	AT1G14730	-7.67408701368971	9.25087931281896e-06
Cc02_g27030	GSCOC_T00025019001	A0A068UJC4	Cysteine/Histidine-rich C1 domain family protein	GO:0046872		-7.65617110228464	0.000725935090475817
Cc08_g16900	GSCOC_T00035666001	A0A068UUQ0	Putative NAC domain-containing protein 12	GO:0005634;GO:0003677;GO:0006355		-7.62734186562952	0.000164581137805448
Cc02_g16160	GSCOC_T00014093001	A0A068TLQ6	Putative GDSL esterase/lipase At1g29670	GO:0016788		-7.60640593766121	0.000138954050612694
Cc03_g14440	GSCOC_T00026661001	A0A068UI79	unknown protein; BEST Arabidopsis thaliana protein match is	GO:0016021		-7.60552051327052	0.000842645597075565
Cc08_g16000	GSCOC_T00035548001	A0A068UUD4	Endoglucanase 6	GO:0030246;GO:0008810;GO:0030245;GO:0030246;GO:0008810;GO:0030245	AT1G64390	-7.59245533946566	3.52868912076308e-14
Cc06_g09480	GSCOC_T00041909001	A0A068U480	Predicted protein (Fragment)		AT3G24480	-7.58284635261385	0.000146307637477651
Cc03_g09650	GSCOC_T00030951001	A0A068UP31	Auxin-responsive family protein	GO:0016021;GO:0046872;GO:0055114		-7.58170431253939	0.000924288760770068
Cc01_g16990	GSCOC_T00016376001	A0A068U6E2	Probable LRR receptor-like serine/threonine-protein kinase At5g48740	GO:0016021;GO:0005524;GO:0004672	AT5G48740	-7.57564154240795	1.859227095013e-07
Cc05_g09750	GSCOC_T00021544001	A0A068UD87	Hypothetical protein			-7.54675454378498	0.00275213287279252
Cc08_g15710	GSCOC_T00035511001	A0A068UUM7	Arabinogalactan peptide 20	GO:0016021		-7.54419270075543	1.99063192147941e-05
Cc01_g10170	GSCOC_T00024099001	A0A068UFE8	Putative Uncharacterized protein At1g08160	GO:0016021		-7.52833595813392	0.00111379348064787
Cc02_g17600	GSCOC_T00014280001	A0A068TLD9	Probable receptor-like serine/threonine-protein kinase At4g34500	GO:0016021;GO:0005524;GO:0004674	AT4G34500	-7.52590512509268	1.77012542278604e-10
Cc05_g10800	GSCOC_T00021396001	A0A068UCX5	TRICHOME BIREFRINGENCE-LIKE 41			-7.51492682562208	0.000223881876644675
Cc07_g10520	GSCOC_T00037105001	A0A068U0R4	NAC domain-containing protein 7	GO:0005634;GO:0003677;GO:0006355		-7.50897385718819	0.00277851348052789
Cc02_g09150	GSCOC_T00029696001	A0A068TV77	GDSL esterase/lipase At5g33370	GO:0016788		-7.48468907642925	0.00144361105720708
Cc02_g14000	GSCOC_T00029070001	A0A068TTU1	Putative Homeobox-leucine zipper protein ATHB-52	GO:0005634;GO:0043565;GO:0006355		-7.48334504512222	0.00847879659391522
Cc05_g06730	GSCOC_T00042182001	A0A068V293	Putative uncharacterized protein			-7.47704953262414	0.00166369109165392
Cc02_g27850	GSCOC_T00025137001	A0A068UGU3	Putative uncharacterized protein			-7.45736898937195	2.20521239210897e-07
Cc07_g06750	GSCOC_T00039999001	A0A068U202	Subtilisin-like protease	GO:0004252	AT5G67360	-7.45302163592195	1.78789104245546e-21
Cc11_g08860	GSCOC_T00032818001	A0A068TZH8	Putative uncharacterized protein	GO:0046872;GO:0030001	AT1G23000	-7.45265541591039	4.71144475218567e-05
Cc02_g17450	GSCOC_T00014261001	A0A068TLC4	Uncharacterized protein	GO:0005634;GO:0003677	AT4G39250	-7.44819940501785	3.02926011472983e-32
Cc02_g37030	GSCOC_T00028045001	A0A068UKA7	Xylem serine proteinase 1	GO:0004252		-7.44439585959358	0.00211180385821692
Cc01_g04720	GSCOC_T00015822001	A0A068V5I0	DNA-damage-repair/toleration protein DRT100			-7.43719671397441	0.00153989490444395
Cc01_g10430	GSCOC_T00024139001	A0A068UHC4	Serine carboxypeptidase-like 48	GO:0004185		-7.43481661845036	0.00159808468140869
Cc08_g09400	GSCOC_T00017295001	A0A068V6R5	Aquaporin TIP4-1	GO:0016021;GO:0015267	AT2G25810	-7.41431917438721	1.22593716133668e-07
Cc11_g10190	GSCOC_T00032610001	A0A068TWD9	3-ketoacyl-CoA synthase 6	GO:0016021;GO:0016747;GO:0006633	AT1G68530	-7.38507156342966	2.06524581925837e-14
Cc09_g09750	GSCOC_T00011978001	A0A068VI40	AWPM-19-like family protein	GO:0016021		-7.36040258396233	0.00218060631449777
Cc10_g03370	GSCOC_T00024861001	A0A068UH22	Pathogenesis-related protein 5			-7.35899631635167	0.000286350644556501
Cc06_g20360	GSCOC_T00022963001	A0A068UCI3	Bifunctional inhibitor/lipid-transfer protein/seed storage 2S albumin superfamily protein		AT4G12470	-7.34913754315211	0.00957385320255926
Cc07_g13390	GSCOC_T00036742001	A0A068TZB1	Glucan endo-1,3-beta-glucosidase 2	GO:0046658;GO:0004553;GO:0005975	AT1G66250	-7.34865750423252	2.50497515416497e-06
Cc05_g02420	GSCOC_T00020978001	A0A068UB96	Fasciclin-like arabinogalactan protein 7	GO:0046658	AT2G04780	-7.34506790098197	2.18417435722327e-09
Cc01_g09890	GSCOC_T00024060001	A0A068UFL3	Glucomannan 4-beta-mannosyltransferase 2	GO:0005794;GO:0016021;GO:0047259;GO:0051753;GO:0010192;GO:0048359	AT5G22740	-7.32291626390018	6.9188004603714e-12
Cc00_g00740	GSCOC_T00036186001	A0A068UVV4	NADP-dependent alkenal double bond reductase P1	GO:0016021;GO:0016491		-7.32184920533346	2.56711199120455e-05
Cc00_g17330	GSCOC_T00001370001	A0A068VHL9	Late embryogenesis abundant (LEA) hydroxyproline-rich glycoprotein family	GO:0016021		-7.32174088882046	0.00258640579951935
Cc04_g03500	GSCOC_T00022045001	A0A068TQ72	Probable sulfate transporter 3.4	GO:0016021;GO:0005886;GO:0009506;GO:0008271;GO:0006817		-7.29847125781673	0.00787886165785777
Cc04_g12880	GSCOC_T00003262001	A0A068VEF1	Gibberellin 3-beta-dioxygenase 1	GO:0046872;GO:0016491		-7.28689431408602	9.56212994197431e-05
Cc10_g04610	GSCOC_T00034915001	A0A068TYE9	Putative Subtilisin-like protease	GO:0004252	AT5G67090	-7.28382119999895	0.000158695194844295
Cc00_g32370	GSCOC_T00005756001	A0A068VMR3	Putative Probable LRR receptor-like serine/threonine-protein kinase At4g08850	GO:0016021;GO:0005524;GO:0004672		-7.26848003071593	0.00396079581325517
Cc08_g13970	GSCOC_T00030280001	A0A068UND7	Ethylene-responsive transcription factor ERF025	GO:0005634;GO:0003677;GO:0003700		-7.25215254871753	0.00361834559444488
Cc08_g08670	GSCOC_T00009069001	A0A068VCN3	Putative unknown protein; INVOLVED IN			-7.21049690783218	0.00657235576107989
Cc02_g36000	GSCOC_T00042762001	A0A068V3N3	Putative myb domain protein 61	GO:0005634;GO:0003677		-7.19252433620033	0.000227766106366923
Cc03_g14190	GSCOC_T00031813001	A0A068UR09	Basic endochitinase	GO:0004553;GO:0005975	AT5G24090	-7.19218037890288	9.75916361784289e-28
Cc11_g06250	GSCOC_T00020631001	A0A068UB75	Putative Stellacyanin	GO:0009055		-7.19184214671235	0.00696653861766388
Cc02_g39920	GSCOC_T00027642001	A0A068UK09	NAC domain-containing protein 43	GO:0005634;GO:0003677;GO:0006355		-7.1868031001908	6.41217650917045e-06
Cc10_g09820	GSCOC_T00031496001	A0A068USY6	Germin-like protein subfamily 1 member 14	GO:0048046;GO:0005618;GO:0030145;GO:0045735	AT5G39110	-7.17903263874645	7.73399299761658e-10
Cc03_g01550	GSCOC_T00025770001	A0A068TRH6	unknown protein; BEST Arabidopsis thaliana protein match is			-7.17014100800219	6.94173577460653e-07
Cc08_g10490	GSCOC_T00027017001	A0A068UKX9	Putative UPF0481 protein At3g47200	GO:0016021		-7.13804749656617	0.00577141879329509
Cc03_g01290	GSCOC_T00025735001	A0A068TR76	Major allergen Pru ar 1	GO:0010427;GO:0004864;GO:0038023;GO:0009738;GO:0006952	AT1G24020	-7.13186870810156	9.60885559454725e-07
Cc02_g27550	GSCOC_T00025086001	A0A068UGS1	DNA-damage-repair/toleration protein DRT100		AT3G12610	-7.1262432229401	0.00952598924373095
Cc10_g02940	GSCOC_T00024808001	A0A068UH38	Putative uncharacterized protein			-7.12019821385262	0.00906169499539386
Cc02_g13240	GSCOC_T00029182001	A0A068TW23	Hypothetical protein	GO:0016021		-7.08969868191415	0.00763083339549699
Cc08_g08870	GSCOC_T00017222001	A0A068V6J0	Dehydration-responsive protein RD22			-7.07431215768343	0.00917266149518752
Cc08_g12770	GSCOC_T00030433001	A0A068UNN7	14 kDa proline-rich protein DC2.15		AT4G12480	-7.03161816193307	5.52907488571748e-12
Cc00_g09440	GSCOC_T00008030001	A0A068VFN6	RHO guanyl-nucleotide exchange factor 14	GO:0005089;GO:0080092	AT1G31650	-7.02875740090618	0.000266596893423769
Cc09_g08340	GSCOC_T00020786001	A0A068UAW4	Putative Heavy metal transport/detoxification superfamily protein	GO:0046872;GO:0030001		-7.02131002849682	3.73607174128488e-10
Cc09_g03130	GSCOC_T00017586001	A0A068U6V0	GDSL esterase/lipase At5g33370	GO:0016788;GO:0042538;GO:0010226;GO:0009751	AT5G33370	-7.00616870975546	0.000479594086241867
Cc06_g00560	GSCOC_T00023237001	A0A068UCX2	Putative uncharacterized protein			-6.99096955387538	0.00460771644469896
Cc06_g13440	GSCOC_T00041397001	A0A068U471	Xyloglucan endotransglucosylase/hydrolase protein 22	GO:0048046;GO:0005618;GO:0004553;GO:0016762;GO:0042546;GO:0071555;GO:0010411		-6.98961034844046	0.000733069310466815
Cc01_g06720	GSCOC_T00030070001	A0A068UMJ2	L-ascorbate oxidase	GO:0005576;GO:0005507;GO:0016491		-6.98199652087389	0.000663787751191719
Cc08_g02370	GSCOC_T00037708001	A0A068UX32	Putative Deacetylvindoline O-acetyltransferase	GO:0016747		-6.98078924686494	1.38019534549779e-11
Cc06_g14690	GSCOC_T00041223001	A0A068U3T8	Cellulose synthase A catalytic subunit 7 [UDP-forming]	GO:0016021;GO:0005886;GO:0016760;GO:0046872;GO:0071555;GO:0030244	AT5G17420	-6.97868172575518	6.79195914371922e-09
Cc10_g14500	GSCOC_T00033583001	A0A068USF9	Hypothetical protein	GO:0016021		-6.97569004963391	3.4685248181282e-16
Cc04_g09640	GSCOC_T00008123001	A0A068VIW8	Protein ASPARTIC PROTEASE IN GUARD CELL 1	GO:0004190;GO:0009737;GO:0009414	AT3G18490	-6.97337690320096	8.67728555195515e-57
Cc05_g07830	GSCOC_T00016787001	A0A068V5P4	Putative Fasciclin-like arabinogalactan protein 6			-6.95799002113981	1.41869656306601e-16
Cc11_g13960	GSCOC_T00032120001	A0A068TY27	Putative ARM repeat superfamily protein	GO:0005874;GO:0008017	AT1G27210	-6.95366439284933	0.00112411711403186
Cc07_g19200	GSCOC_T00018625001	A0A068U8J0	Aspartic proteinase nepenthesin-1	GO:0004190		-6.91690786154172	2.58960665448457e-05
Cc01_g05010	GSCOC_T00028585001	A0A068UNV2	Hypothetical protein			-6.88100077055409	0.000625064119217769
Cc11_g08160	GSCOC_T00032913001	A0A068TZM6	Endoglucanase 8	GO:0008810;GO:0030245		-6.85636096868943	0.000882888074143655
Cc00_g31820	GSCOC_T00004172001	A0A068VML3	Putative Strictosidine synthase 1	GO:0016844;GO:0009058	AT1G74020	-6.8414357665659	1.30702408094688e-13
Cc01_g17930	GSCOC_T00016263001	A0A068U856	Cellulose synthase A catalytic subunit 4 [UDP-forming]	GO:0016021;GO:0005886;GO:0016760;GO:0046872;GO:0071555;GO:0030244;GO:0009834	AT5G44030	-6.83777376900855	0.00433261000231719
Cc01_g12960	GSCOC_T00028253001	A0A068ULE9	Expansin-A4	GO:0005618;GO:0005576;GO:0016020;GO:0009664	AT2G39700	-6.82711851775074	1.26739995061145e-10
Cc10_g10630	GSCOC_T00036015001	A0A068UXS5	Pathogenesis-related protein 5	GO:0016021		-6.82410044867669	0.000777665616081338
Cc05_g09650	GSCOC_T00021556001	A0A068UD99	Chlorophyll a-b binding protein 1, chloroplastic	GO:0009535;GO:0016021;GO:0009522;GO:0009523;GO:0016168;GO:0009765;GO:0018298	AT1G29930	-6.81798108023106	0.000778363118026778
Cc01_g00050	GSCOC_T00012435001	A0A068VFX6	arabinogalactan protein 14	GO:0016021		-6.81466190546717	6.30436506486088e-11
Cc08_g06040	GSCOC_T00024418001	A0A068UFB4	Long-chain-alcohol oxidase FAO4A	GO:0016021;GO:0050660;GO:0046577		-6.77409907401415	3.38332548066202e-11
Cc03_g04550	GSCOC_T00026178001	A0A068TSB6	3-ketoacyl-CoA synthase 17	GO:0016021;GO:0016747;GO:0006633		-6.75075351237927	0.000131047287580639
Cc08_g08050	GSCOC_T00013081001	A0A068VEL3	Putative methyltransferases	GO:0016021		-6.72865442414707	0.00128844936808025
Cc01_g08580	GSCOC_T00023887001	A0A068UGU2	Late embryogenesis abundant (LEA) hydroxyproline-rich glycoprotein family	GO:0016021	AT3G11660	-6.7163665370234	8.73418890492392e-08
Cc08_g10270	GSCOC_T00026990001	A0A068UIF6	Putative LRR receptor-like serine/threonine-protein kinase GSO1			-6.70716714401167	0.000358686035234213
Cc08_g08820	GSCOC_T00017214001	A0A068V6I5	Putative BURP domain-containing protein 5		AT5G25610	-6.70658646958765	0.000402774399701966
Cc08_g15670	GSCOC_T00035507001	A0A068UUZ2	Probable inactive receptor kinase At4g23740	GO:0016021;GO:0005886;GO:0005524;GO:0004672	AT4G23740	-6.69841174800472	9.28463409865506e-07
Cc08_g05460	GSCOC_T00024314001	A0A068UFX9	Organic cation/carnitine transporter 3	GO:0016021;GO:0022857		-6.69497847125788	0.000125010966811599
Cc08_g11520	GSCOC_T00027156001	A0A068UIQ2	Putative HXXXD-type acyl-transferase family protein	GO:0016747;GO:0042759;GO:0010025	AT4G24510	-6.68452000461657	2.50298065602977e-07
Cc01_g07070	GSCOC_T00030127001	A0A068UMQ1	Putative Protein of Unknown Function (DUF239)			-6.67157293805505	3.31595583051335e-09
Cc05_g12850	GSCOC_T00021135001	A0A068UCB7	Calcium-binding protein PBP1		AT4G27280	-6.65926401288721	1.00074091334838e-06
Cc09_g00620	GSCOC_T00017924001	A0A068U7L1	Putative Glucan endo-1,3-beta-glucosidase 1			-6.64172393023168	0.00173256854584849
Cc09_g03070	GSCOC_T00017592001	A0A068U702	Protein of Unknown Function (DUF239)			-6.63596014177376	2.8774445910299e-09
Cc02_g11660	GSCOC_T00029384001	A0A068TU18	Probable xyloglucan endotransglucosylase/hydrolase protein 8	GO:0048046;GO:0005618;GO:0004553;GO:0016762;GO:0042546;GO:0071555;GO:0010411	AT1G11545	-6.62738353461342	1.71643234166238e-17
Cc10_g07490	GSCOC_T00034515001	A0A068TY76	Probable beta-D-xylosidase 7	GO:0004553;GO:0005975	AT1G78060	-6.60736162129123	5.50457299595777e-10
Cc04_g10900	GSCOC_T00042667001	A0A068V3F8	Putative CONTAINS InterPro DOMAIN/s	GO:0010088	AT3G01680	-6.58616167889785	4.76074090186585e-10
Cc06_g08330	GSCOC_T00031146001	A0A068US15	Putative Equilibrative nucleoside transporter 3	GO:0016021;GO:0005337		-6.573897804778	0.00380702707950497
Cc07_g09010	GSCOC_T00040294001	A0A068U2S7	Putative unknown protein; BEST Arabidopsis thaliana protein match is			-6.53317450969213	6.94312434230959e-06
Cc00_g05460	GSCOC_T00000304001	A0A068VDS7	Pathogenesis-related protein 5			-6.52459358196032	7.82867845694186e-16
Cc02_g06950	GSCOC_T00039249001	A0A068V0M5	Laccase-4	GO:0048046;GO:0005507;GO:0052716;GO:0046274	AT2G38080	-6.52249490394956	8.00411183297951e-07
Cc07_g05170	GSCOC_T00039781001	A0A068U258	Probable galacturonosyltransferase-like 2	GO:0016757		-6.50094073069514	8.55998365219251e-07
Cc02_g26690	GSCOC_T00024970001	A0A068UHG8	Protein of Unknown Function (DUF239)			-6.49975355409134	3.00010438397108e-11
Cc03_g10700	GSCOC_T00041994001	A0A068V432	Probably inactive leucine-rich repeat receptor-like protein kinase At3g28040	GO:0016021;GO:0005524;GO:0004672	AT3G28040	-6.49942981480617	3.28246769805526e-08
Cc10_g06530	GSCOC_T00034641001	A0A068U0J2	Probable amino acid permease 7	GO:0016021		-6.49717729578237	0.00460771644469896
Cc10_g02560	GSCOC_T00024760001	A0A068UG71	Jasmonate O-methyltransferase	GO:0030795;GO:0009694;GO:0009611	AT1G19640	-6.49620250181652	2.50022789970688e-10
Cc07_g06280	GSCOC_T00039927001	A0A068U4I3	Putative Uncharacterized protein At4g06744		AT4G06744	-6.48527716532855	1.0127212505858e-12
Cc10_g04340	GSCOC_T00034946001	A0A068TZ57	Putative unknown protein; Has 26 Blast hits to 26 proteins in 10 species			-6.47768503313814	9.95796552848058e-05
Cc05_g01210	GSCOC_T00000928001	A0A068VCP4	Putative uncharacterized protein			-6.46172780901709	9.99462986939275e-07
Cc10_g03280	GSCOC_T00024851001	A0A068UIV3	Putative DNA-3-methyladenine glycosylase 1	GO:0008725;GO:0006284		-6.46115030964948	0.00153943151900372
Cc11_g06970	GSCOC_T00020735001	A0A068UBN9	RNA-dependent RNA polymerase 1	GO:0003723;GO:0003968;GO:0031047	AT1G14790	-6.44506451741164	0.00203921309728773
Cc01_g09730	GSCOC_T00024037001	A0A068UH50	Uncharacterized protein At5g22580		AT5G22580	-6.43879577871143	1.85909228379709e-05
Cc04_g02840	GSCOC_T00021966001	A0A068TRL1	Aquaporin TIP2-1	GO:0016021;GO:0015267	AT3G16240	-6.43799502298009	6.83984900936896e-09
Cc08_g04630	GSCOC_T00015666001	A0A068V4M7	Pectinacetylesterase family protein	GO:0005618;GO:0005576;GO:0016787;GO:0071555	AT4G19420	-6.42832416632854	5.5649159316406e-34
Cc02_g15850	GSCOC_T00014049001	A0A068TKZ6	Long chain acyl-CoA synthetase 1	GO:0003824		-6.40733441960257	0.00490038383961944
Cc02_g10710	GSCOC_T00029500001	A0A068TU94	Putative Protein of unknown function (DUF1635)			-6.39807557544026	0.00411996706269305
Cc11_g10680	GSCOC_T00032546001	A0A068TWD0	Putative CLAVATA3/ESR (CLE)-related protein 13	GO:0016021		-6.39064681973702	0.00403987567752602
Cc10_g00910	GSCOC_T00024551001	A0A068UFT0	L-ascorbate oxidase homolog	GO:0005507;GO:0016491	AT4G12420	-6.37037396392804	3.10199569180282e-08
Cc02_g13790	GSCOC_T00029096001	A0A068TVX4	Putative Protein E6			-6.35180429394066	1.23099352044637e-12
Cc06_g06480	GSCOC_T00031377001	A0A068USK3	exocyst subunit exo70 family protein A2	GO:0000145;GO:0010252;GO:0006887;GO:0009630;GO:0015031;GO:0010015		-6.34105016834767	0.000743345185809627
Cc00_g25900	GSCOC_T00006242001	A0A068VNH1	EXORDIUM like 2		AT5G64260	-6.31981287243712	1.40891135297062e-10
Cc02_g27430	GSCOC_T00025073001	A0A068UJF3	C2 calcium/lipid-binding plant phosphoribosyltransferase family protein	GO:0016021		-6.31669687485523	0.0054627626631006
Cc09_g03590	GSCOC_T00017527001	A0A068U7U5	Putative ROP-interactive CRIB motif-containing protein 4		AT5G16490	-6.31284223971231	3.72428405236902e-05
Cc06_g03030	GSCOC_T00023573001	A0A068UEH0	Putative Auxin-induced protein 5NG4	GO:0016021;GO:0022857	AT2G37460	-6.30063732903222	0.000604217739808657
Cc04_g05340	GSCOC_T00022284001	A0A068TSE1	AP2-like ethylene-responsive transcription factor At1g16060	GO:0005634;GO:0003677;GO:0003700		-6.29878677543523	0.00162858867325493
Cc04_g01540	GSCOC_T00021809001	A0A068TR77	Putative Bifunctional inhibitor/lipid-transfer protein/seed storage 2S albumin superfamily protein	GO:0005504;GO:0009627		-6.29330450844505	0.00883583420670047
Cc11_g10770	GSCOC_T00032534001	A0A068TWX9	Piriformospora indica-insensitive protein 2			-6.28598614393521	0.000645549780941655
Cc04_g07350	GSCOC_T00022548001	A0A068TR73	Putative Protein ASPARTIC PROTEASE IN GUARD CELL 1	GO:0004190;GO:0009737;GO:0009414	AT3G18490	-6.28372665556046	8.28191822569152e-24
Cc00_g21310	GSCOC_T00006968001	A0A068VJM0	Putative Probable leucine-rich repeat receptor-like protein kinase At1g35710	GO:0016021;GO:0005524;GO:0004672		-6.28119138480791	0.00602743461216145
Cc10_g08960	GSCOC_T00034317001	A0A068TX56	Hypothetical protein	GO:0016021		-6.26163833825456	0.00659270962479372
Cc02_g14590	GSCOC_T00013872001	A0A068TKG8	GDSL esterase/lipase At5g45910	GO:0016788		-6.25758594365123	0.00911914695642341
Cc07_g10490	GSCOC_T00037109001	A0A068U064	Putative ATP binding microtubule motor family protein	GO:0005874;GO:0005524;GO:0008017;GO:0003777;GO:0007018	AT5G66310	-6.25708571463048	0.00613384152822979
Cc09_g01610	GSCOC_T00017786001	A0A068U7X4	Predicted protein			-6.25675479431892	0.000536140505326817
Cc05_g11440	GSCOC_T00021315001	A0A068UBP1	Putative IQ-domain 10			-6.24754533670734	1.19591966933734e-06
Cc06_g02050	GSCOC_T00023445001	A0A068UEC8	RHO guanyl-nucleotide exchange factor 7	GO:0005089		-6.24243039890377	0.000679100201160549
Cc04_g15670	GSCOC_T00042343001	A0A068V248	LRR receptor-like serine/threonine-protein kinase FEI 1	GO:0016021;GO:0005524;GO:0004674;GO:0030244		-6.23896109244447	0.00920263612763433
Cc11_g06030	GSCOC_T00020585001	A0A068UAB6	Putative Ankyrin repeat family protein	GO:0016021		-6.23851014199914	0.000822244375421438
Cc10_g15400	GSCOC_T00033719001	A0A068USP4	Purine permease 3	GO:0016021;GO:0015211	AT1G28220	-6.22868163352123	8.30423729939888e-51
Cc10_g07680	GSCOC_T00034492001	A0A068U066	Putative AP2-like ethylene-responsive transcription factor ANT			-6.21924112577212	0.00792954506829067
Cc09_g06250	GSCOC_T00033338001	A0A068UUF9	Beta-glucosidase 14	GO:0004553;GO:0005975		-6.21600100503606	0.00810994690500578
Cc06_g02360	GSCOC_T00023490001	A0A068UDE3	Thaumatin-like protein			-6.1959448310346	0.00791294713558765
Cc10_g05940	GSCOC_T00034734001	A0A068TYU9	Hypothetical protein			-6.18190332030071	0.000254907219413421
Cc04_g15630	GSCOC_T00042339001	A0A068V2I1	Putative Sex determination protein tasselseed-2			-6.17052831981467	0.00237793711867638
Cc02_g19090	GSCOC_T00014473001	A0A068TLN2	Uncharacterized protein At4g06744		AT4G06744	-6.16791784545567	5.09170690091708e-08
Cc08_g07750	GSCOC_T00011866001	A0A068VDV8	Hypothetical protein			-6.13474125095531	0.00868776633274702
Cc02_g01270	GSCOC_T00019943001	A0A068UBL4	Glucan endo-1,3-beta-glucosidase	GO:0004553;GO:0005975		-6.11193968027411	0.000285713606744659
Cc02_g05340	GSCOC_T00039040001	A0A068V1Y2	Putative Probably inactive leucine-rich repeat receptor-like protein kinase At3g28040	GO:0016021;GO:0005886;GO:0005524;GO:0004672	AT3G56370	-6.11163545457928	9.41839411538511e-07
Cc00_g25060	GSCOC_T00002589001	A0A068VKD7	Putative Beta-hexosaminidase subunit B2	GO:0004563;GO:0102148;GO:0005975	AT1G65590	-6.10084266655311	3.95407096619379e-17
Cc10_g14530	GSCOC_T00033590001	A0A068USZ1	Putative uncharacterized protein	GO:0005199;GO:0009664		-6.07071652118625	8.02807893919113e-10
Cc01_g08630	GSCOC_T00023894001	A0A068UGU7	Putative ovate family protein 6	GO:0005634;GO:0045892	AT3G52525	-6.06112211183447	7.77808390221661e-18
Cc06_g03690	GSCOC_T00023658001	A0A068UGI6	Putative Predicted protein			-6.06014982476031	1.16054211243546e-05
Cc02_g27290	GSCOC_T00025056001	A0A068UHP9	Furcatin hydrolase	GO:0004553;GO:0005975	AT5G44640	-6.05831322225808	9.1046438955208e-10
Cc07_g13350	GSCOC_T00036754001	A0A068U0E6	Probable inactive receptor kinase At1g48480	GO:0016021;GO:0005524;GO:0004672	AT5G16590	-6.05740947007531	2.08609779477105e-05
Cc10_g11450	GSCOC_T00013664001	A0A068V9F2	Putative Gibberellin-regulated protein 9			-6.04399289596345	0.00137491709350342
Cc01_g14170	GSCOC_T00028412001	A0A068UL12	Vacuolar cation/proton exchanger 1	GO:0016021;GO:0005774;GO:0015369	AT3G51860	-6.03611648285243	3.00596270734223e-05
Cc02_g09600	GSCOC_T00029636001	A0A068TV37	Putative FUNCTIONS IN			-6.02956767078189	0.000170210809207292
Cc09_g05370	GSCOC_T00007119001	A0A068VCG0	Polygalacturonase QRT3	GO:0004650		-5.9831422665776	3.45356581446722e-05
Cc06_g16770	GSCOC_T00004128001	A0A068VDK4	Thiol protease SEN102	GO:0008234	AT5G45890	-5.97834989466363	0.00408465347367028
Cc06_g06900	GSCOC_T00031327001	A0A068UQ54	Fasciclin-like arabinogalactan protein 17		AT5G06390	-5.97252671150903	1.45360509543805e-13
Cc07_g08840	GSCOC_T00040274001	A0A068U3P4	3-ketoacyl-CoA synthase 6	GO:0016021;GO:0016747;GO:0006633	AT1G68530	-5.96043064216201	4.32202172405336e-11
Cc02_g39650	GSCOC_T00027687001	A0A068UKA4	NC domain-containing protein-related			-5.95611408335714	0.000219835303078296
Cc04_g03930	GSCOC_T00022109001	A0A068TQ17	Cytochrome P450 734A1	GO:0016021;GO:0020037;GO:0005506;GO:0004497;GO:0016705		-5.91950062597767	3.99864840241016e-09
Cc02_g04420	GSCOC_T00020354001	A0A068UCI1	Leucine-rich repeat receptor-like protein kinase TDR	GO:0016021;GO:0005886;GO:0005524;GO:0004674;GO:0051301;GO:0010067;GO:0010223;GO:0010089	AT5G61480	-5.86885722899607	2.33644736489216e-05
Cc08_g03030	GSCOC_T00037810001	A0A068UXM2	ABC transporter B family member 2	GO:0016021;GO:0005524;GO:0016887;GO:0042626	AT4G25960	-5.85812279539194	9.08221251475848e-10
Cc00_g24050	GSCOC_T00009221001	A0A068VK27	Putative Dehydration-responsive protein RD22		AT5G25610	-5.85746420320758	7.34132085029572e-10
Cc10_g13470	GSCOC_T00035288001	A0A068UUK9	Putative Subtilisin-like protease SDD1	GO:0004252	AT1G04110	-5.83204011901893	1.83126824974648e-10
Cc07_g09760	GSCOC_T00037200001	A0A068U309	Isoflavone reductase homolog			-5.82365735824886	4.58181507083299e-19
Cc10_g09100	GSCOC_T00034296001	A0A068TX96	Putative LRR receptor-like serine/threonine-protein kinase GSO1	GO:0016021;GO:0005524;GO:0004674		-5.82006373972046	0.000783791496339401
Cc07_g13130	GSCOC_T00036783001	A0A068TZI6	Probable receptor protein kinase TMK1	GO:0016021;GO:0005886;GO:0005524;GO:0004675	AT1G66150	-5.81235937930063	2.09542329041623e-07
Cc08_g08890	GSCOC_T00017226001	A0A068V668	Putative BURP domain-containing protein 5			-5.81174304778887	7.65822577878795e-08
Cc06_g12720	GSCOC_T00041501001	A0A068U3E8	Putative GDSL esterase/lipase 5	GO:0016788	AT1G53920	-5.79480991180017	0.00141971259406489
Cc00_g26360	GSCOC_T00002363001	A0A068VL27	Putative S-norcoclaurine synthase	GO:0006952		-5.78540674867427	9.27824533079004e-07
Cc07_g10860	GSCOC_T00037064001	A0A068U2P9	Pathogenesis-related protein 5	GO:0016021	AT1G75040	-5.7826105893312	3.17354515934233e-17
Cc10_g07380	GSCOC_T00034531001	A0A068U093	Putative unknown protein; FUNCTIONS IN			-5.78090003725203	3.33220006797016e-08
Cc00_g08090	GSCOC_T00006943001	A0A068VEK5	Putative Deacetylvindoline O-acetyltransferase	GO:0016747		-5.77050148278667	2.11570409069572e-06
Cc02_g39350	GSCOC_T00027728001	A0A068UKG8	Cytochrome b561/ferric reductase transmembrane with DOMON related domain	GO:0016021;GO:0055114		-5.75239462866475	3.32145025119367e-05
Cc01_g21160	GSCOC_T00005016001	A0A068V961	Kinesin-4	GO:0005524;GO:0008017;GO:0003777;GO:0007018	AT2G47500	-5.73080792465946	0.000290772860261043
Cc02_g30540	GSCOC_T00023779001	A0A068UF33	Beta-glucosidase 24	GO:0004553;GO:0005975		-5.71578042871283	0.00306221942172254
Cc07_g10920	GSCOC_T00037058001	A0A068U0M9	Putative Rhodanese-like domain-containing protein 17		AT2G17850	-5.70860037751232	6.77818029910524e-09
Cc07_g10950	GSCOC_T00037055001	A0A068U121	Putative Lysosomal alpha-mannosidase	GO:0004559;GO:0030246;GO:0046872;GO:0006013	AT5G66150	-5.70850828791321	1.93766627427367e-08
Cc11_g03390	GSCOC_T00025420001	A0A068UI55	Hypothetical protein			-5.69971588679529	1.32977517347285e-30
Cc04_g14280	GSCOC_T00001598001	A0A068VBL5	Alpha-galactosidase	GO:0052692;GO:0005975	AT5G08370	-5.69611159912283	1.00990505422418e-09
Cc03_g01980	GSCOC_T00025833001	A0A068TSC8	Putative Basic 7S globulin 2	GO:0004190		-5.69212265186281	0.00427280228188068
Cc08_g06540	GSCOC_T00036047001	A0A068UV83	Probable xyloglucan glycosyltransferase 5	GO:0016021	AT4G31590	-5.68916429943457	1.82710021754710e-12
Cc11_g01930	GSCOC_T00019491001	A0A068U8I2	Ran BP2/NZF zinc finger-like superfamily protein	GO:0046872		-5.68783310943206	0.0018557165108126
Cc09_g05050	GSCOC_T00007077001	A0A068VCA0	Cationic amino acid transporter 5	GO:0016021;GO:0022857	AT2G34960	-5.65524305214289	6.64494498956758e-12
Cc10_g15010	GSCOC_T00033663001	A0A068USW9	Probable cellulose synthase A catalytic subunit 9 [UDP-forming]	GO:0016021;GO:0005886;GO:0016760;GO:0046872;GO:0071555;GO:0030244	AT5G64740	-5.63894410824286	7.96589954915886e-17
Cc04_g06040	GSCOC_T00022383001	A0A068TSJ5	Probable inactive receptor kinase At1g48480	GO:0016021;GO:0005524;GO:0004672	AT1G48480	-5.63379875893919	3.51450625281022e-13
Cc00_g25490	GSCOC_T00000226001	A0A068VKU2	Putative 8-hydroxyquercetin 8-O-methyltransferase	GO:0008171;GO:0046983;GO:0032259		-5.62145668753752	3.23664534941864e-11
Cc10_g14210	GSCOC_T00012011001	A0A068VCI7	LRR receptor-like serine/threonine-protein kinase RCH1	GO:0016021;GO:0005524;GO:0004672	AT5G48940	-5.61185036424328	0.00347192121452056
Cc08_g03510	GSCOC_T00034133001	A0A068UTY8	Cellulose synthase-like protein D3	GO:0016021;GO:0016760;GO:0071555;GO:0030244	AT3G03050	-5.59761338357655	3.74757068351654e-05
Cc11_g12510	GSCOC_T00032309001	A0A068TYF0	Probable S-acyltransferase At1g69420	GO:0016021;GO:0019706	AT1G69420	-5.57933156161062	0.000130896116581993
Cc09_g01700	GSCOC_T00017774001	A0A068U9W0	Peroxidase 42	GO:0005576;GO:0020037;GO:0046872;GO:0004601;GO:0042744;GO:0006979	AT4G21960	-5.5698240860429	9.19661231683805e-37
Cc02_g32420	GSCOC_T00001250001	A0A068VBP2	Histidine-containing phosphotransfer protein 1	GO:0000160	AT3G21510	-5.5697626270604	6.31153452298441e-05
Cc02_g01620	GSCOC_T00019989001	A0A068UBP8	Probable pectinesterase/pectinesterase inhibitor 34	GO:0016021;GO:0045330;GO:0004857;GO:0030599;GO:0042545;GO:0045490	AT3G49220	-5.56723133256551	1.50993569844016e-10
Cc02_g24810	GSCOC_T00028837001	A0A068UMC9	Putative uncharacterized protein	GO:0005634;GO:0003677;GO:0003700	AT2G44940	-5.54930017931345	1.68542675578072e-12
Cc06_g01950	GSCOC_T00023434001	A0A068UEB7	Putative uncharacterized protein			-5.54892424406305	8.06888932755977e-08
Cc02_g16640	GSCOC_T00014157001	A0A068TKW3	Putative Aquaporin PIP-type	GO:0016021;GO:0015267		-5.54369490773774	1.77012542278604e-10
Cc03_g13280	GSCOC_T00018943001	A0A068V9D6	Putative LRR receptor-like serine/threonine-protein kinase EFR	GO:0016021;GO:0005524;GO:0004672		-5.5349423956869	0.00359483803334381
Cc10_g09420	GSCOC_T00031547001	A0A068UT13	Putative Protein AIG1	GO:0005525		-5.52043385976228	1.85410706149319e-06
Cc02_g19810	GSCOC_T00014556001	A0A068TMQ4	Probable beta-D-xylosidase 5	GO:0004553;GO:0005975	AT3G19620	-5.50270225239996	0.00295109687869565
Cc04_g04910	GSCOC_T00022230001	A0A068TPJ9	Putative DeSI-like protein At4g17486			-5.48030269118015	0.00132578511104803
Cc07_g10200	GSCOC_T00037148001	A0A068U1A2	Beta-galactosidase 3	GO:0004565;GO:0030246;GO:0005975	AT4G36360	-5.47461198919781	1.85283405575006e-14
Cc04_g11200	GSCOC_T00037284001	A0A068UWQ4	Cytochrome P450 71A1	GO:0020037;GO:0005506;GO:0004497;GO:0016705	AT3G26310	-5.47016561952945	5.71413029219196e-06
Cc00_g35780	GSCOC_T00008950001	A0A068VRA9	Germin-like protein subfamily 1 member 7	GO:0048046;GO:0005618;GO:0030145;GO:0045735		-5.46343536481235	0.000864580126122462
Cc05_g08480	GSCOC_T00016870001	A0A068V5V5	Peroxidase 4	GO:0020037;GO:0046872;GO:0004601;GO:0042744;GO:0006979	AT5G05340	-5.45963952188184	5.21857616265524e-29
Cc02_g36340	GSCOC_T00003937001	A0A068VB76	Probable carboxylesterase 8	GO:0016787	AT2G45600	-5.44557420512864	0.00017071171065988
Cc02_g29530	GSCOC_T00018389001	A0A068V7D0	Putative 21 kDa seed protein	GO:0004866	AT1G17860	-5.4353633346911	6.17444278057809e-07
Cc07_g04510	GSCOC_T00039707001	A0A068U1G0	Hypothetical protein			-5.42022761966029	2.93256495964959e-06
Cc05_g05300	GSCOC_T00035097001	A0A068UU57	Protein of unknown function (DUF1218)	GO:0016021		-5.41079164396527	0.00013037359002722
Cc02_g34040	GSCOC_T00000635001	A0A068V9L9	Predicted protein (Fragment)	GO:0046983		-5.40601153768052	0.00256506832435244
Cc03_g14880	GSCOC_T00026734001	A0A068UHT9	Putative disease resistance protein RGA4	GO:0008194	AT5G03490	-5.40157348043689	4.01453244566778e-06
Cc07_g06410	GSCOC_T00039944001	A0A068U1Z0	Cyclin-D3-1	GO:0042025	AT5G67260	-5.38672777955178	1.24031686347767e-08
Cc02_g13480	GSCOC_T00029145001	A0A068TU88	Putative arabinogalactan protein 30		AT2G33790	-5.37787969117841	9.84963728934703e-14
Cc03_g08190	GSCOC_T00033215001	A0A068UU66	Hypothetical protein			-5.37530738321689	0.00962480188508185
Cc11_g05810	GSCOC_T00020552001	A0A068UCW5	Purple acid phosphatase 8	GO:0016021;GO:0003993;GO:0046872	AT2G01890	-5.37111036393899	0.00243446580508352
Cc02_g00790	GSCOC_T00019875001	A0A068U8U8	Putative uncharacterized protein			-5.36444061340754	0.00754809996089068
Cc11_g14930	GSCOC_T00001041001	A0A068VH36	Probable peptide/nitrate transporter At5g13400	GO:0016021;GO:0022857;GO:0006857	AT5G13400	-5.35997070247257	3.05883077853293e-16
Cc00_g32590	GSCOC_T00011519001	A0A068VMU7	Hypothetical protein			-5.33900573665748	3.95601509148517e-34
Cc10_g07180	GSCOC_T00034556001	A0A068U0B6	Putative peptidases	GO:0016021;GO:0005787;GO:0008233;GO:0048658;GO:0009555;GO:0006465		-5.33750200418337	0.000100208742862304
Cc09_g07430	GSCOC_T00036260001	A0A068UWB7	Reticuline oxidase-like protein	GO:0071949;GO:0016491	AT1G30700	-5.33239377731772	0.000256242552771062
Cc00_g31440	GSCOC_T00006470001	A0A068VQ08	Wound-responsive family protein			-5.33211631315006	0.000338860596977534
Cc11_g13740	GSCOC_T00032144001	A0A068TVG1	Putative membrane lipoprotein	GO:0030247		-5.32003345207446	3.77911697836376e-06
Cc11_g14370	GSCOC_T00032066001	A0A068TW24	MLP-like protein 423	GO:0010427;GO:0004864;GO:0038023;GO:0009738;GO:0006952	AT1G24020	-5.31368399130458	5.52409609144179e-05
Cc00_g27020	GSCOC_T00006600001	A0A068VNS3	Salicylate O-methyltransferase	GO:0008168		-5.30013039400874	0.00632218562835338
Cc08_g02120	GSCOC_T00037673001	A0A068UX07	Type I inositol 1,4,5-trisphosphate 5-phosphatase 2	GO:0016787;GO:0046856	AT4G18010	-5.28972415970349	3.03273739226893e-06
Cc04_g05670	GSCOC_T00022331001	A0A068TPX9	Phospholipase A1-IIdelta	GO:0008970;GO:0006629	AT2G42690	-5.28377949317826	3.77842423798667e-06
Cc08_g15610	GSCOC_T00035500001	A0A068UUL5	ABC transporter C family member 10	GO:0016021;GO:0005524;GO:0016887;GO:0042626	AT3G59140	-5.28223903416662	2.4632869005034e-09
Cc06_g13600	GSCOC_T00041373001	A0A068U5P9	Putative Pathogenesis-related protein PRMS	GO:0005576	AT2G14610	-5.27148850353487	0.000137112095763521
Cc11_g09530	GSCOC_T00032706001	A0A068TWU9	Putative Zinc finger CCCH domain-containing protein 15	GO:0046872		-5.27085492943514	0.000857449937278277
Cc04_g01990	GSCOC_T00021864001	A0A068TRC2	Beta-galactosidase	GO:0009505;GO:0009506;GO:0004565;GO:0030246;GO:0005975	AT3G13750	-5.25232307148478	6.69458350757061e-06
Cc00_g08570	GSCOC_T00005643001	A0A068VFG0	Putative Probable leucine-rich repeat receptor-like protein kinase At1g35710	GO:0005524;GO:0004672	AT3G51740	-5.24447868067747	8.30198683419126e-06
Cc00_g12290	GSCOC_T00009516001	A0A068VGD5	Putative S-norcoclaurine synthase	GO:0006952		-5.23381463941451	4.68002409837167e-05
Cc10_g01720	GSCOC_T00024658001	A0A068UGI9	Hexokinase-2, chloroplastic	GO:0005524;GO:0005536;GO:0004396;GO:0001678;GO:0006096		-5.23088052399148	0.00144361105720708
Cc07_g06570	GSCOC_T00039972001	A0A068U2L0	Putative Xyloglucan galactosyltransferase KATAMARI1 homolog	GO:0016021;GO:0016757;GO:0006486		-5.19983403236516	5.60567684167386e-05
Cc00_g21850	GSCOC_T00013635001	A0A068VJR5	Putative UDP-glycosyltransferase 83A1	GO:0008194	AT3G02100	-5.18401311169593	3.69803304375234e-06
Cc01_g04150	GSCOC_T00039285001	A0A068V2H0	Calcium-dependent lipid-binding (CaLB domain) plant phosphoribosyltransferase family protein	GO:0016021	AT3G57880	-5.17026975816604	5.2823151733852e-09
Cc08_g12830	GSCOC_T00030424001	A0A068UN90	unknown protein; BEST Arabidopsis thaliana protein match is			-5.16132140954325	2.3162203474746e-13
Cc02_g12760	GSCOC_T00029241001	A0A068TTM1	Metal-nicotianamine transporter YSL1	GO:0016021;GO:0055085	AT4G24120	-5.1595117788667	0.000123544789449117
Cc00_g18380	GSCOC_T00005502001	A0A068VHW6	Momilactone A synthase		AT3G51680	-5.15849972102466	3.33811195834184e-08
Cc05_g04890	GSCOC_T00035027001	A0A068UTQ3	Glucose-6-phosphate/phosphate translocator 2, chloroplastic	GO:0016021;GO:0022857	AT1G61800	-5.15730689845347	1.29206640348353e-06
Cc01_g17620	GSCOC_T00016300001	A0A068U6L0	Receptor-like serine/threonine-protein kinase ALE2	GO:0016021;GO:0005886;GO:0005524;GO:0004674;GO:0042335;GO:1905393;GO:0046777;GO:0010068	AT2G20300	-5.15153200033528	1.79793724634148e-05
Cc00_g19490	GSCOC_T00003022001	A0A068VIV3	Hypothetical protein			-5.1389172889489	7.82867845694186e-16
Cc02_g31930	GSCOC_T00027470001	A0A068ULM8	Putative UDP-glycosyltransferase 83A1	GO:0008194		-5.13672563374217	0.000188373996007969
Cc10_g04190	GSCOC_T00034966001	A0A068TZ68	Chlorophyll a-b binding protein P4, chloroplastic	GO:0009535;GO:0016021;GO:0009522;GO:0009523;GO:0016168;GO:0009765;GO:0018298	AT1G45474	-5.12662419802402	3.0711997977371e-27
Cc05_g10860	GSCOC_T00021388001	A0A068UEH9	Probable leucine-rich repeat receptor-like serine/threonine-protein kinase At3g14840	GO:0016021;GO:0005524;GO:0004672		-5.12300080415761	0.00131709811843712
Cc07_g16910	GSCOC_T00037501001	A0A068UX52	Citrate-binding protein			-5.1045398490262	0.000196603557507057
Cc04_g16380	GSCOC_T00035729001	A0A068UV60	(-)-germacrene D synthase	GO:0000287;GO:0010333		-5.09534241220569	0.00045736528237843
Cc03_g14830	GSCOC_T00026726001	A0A068UHT6	Putative UDP-glycosyltransferase 71C4	GO:0008194	AT1G07260	-5.07843904761611	6.58567828380677e-06
Cc08_g02700	GSCOC_T00037754001	A0A068UXN2	Carboxylesterase 1	GO:0016787	AT5G62180	-5.07761595518456	1.86359180228332e-11
Cc01_g00080	GSCOC_T00012431001	A0A068VCN1	Protein of Unknown Function (DUF239)	GO:0016021		-5.07313265689865	4.17721738997751e-14
Cc09_g08130	GSCOC_T00020749001	A0A068UAL3	UDP-glycosyltransferase 76C4	GO:0008194		-5.07142185384506	0.00398378441160766
Cc02_g10080	GSCOC_T00029568001	A0A068TV65	Cytochrome P450 77A3	GO:0016021;GO:0020037;GO:0005506;GO:0004497;GO:0016705	AT5G04660	-5.05686094057734	8.62615182599365e-08
Cc03_g15590	GSCOC_T00026848001	A0A068UIL3	UDP-glucose flavonoid 3-O-glucosyltransferase 6	GO:0008194		-5.05573687594711	0.00153943151900372
Cc09_g07150	GSCOC_T00036308001	A0A068UVQ4	Putative Subtilisin-like protease	GO:0004252		-5.05321287903085	0.00899845722643704
Cc10_g15220	GSCOC_T00033691001	A0A068UUX4	Putative Probable LRR receptor-like serine/threonine-protein kinase At4g08850	GO:0016021;GO:0005524;GO:0004672	AT4G08850	-5.05153858783663	0.00499755762767651
Cc06_g16470	GSCOC_T00030688001	A0A068UNH5	Probably inactive leucine-rich repeat receptor-like protein kinase At5g06940	GO:0016021;GO:0005524;GO:0004672	AT5G06940	-5.05132214939887	0.00357964697823213
Cc02_g20780	GSCOC_T00014697001	A0A068TN37	Putative glutamine amidotransferase YLR126C	GO:0006541	AT2G23970	-5.04038505158845	3.73916187784531e-12
Cc02_g39730	GSCOC_T00027676001	A0A068UJK4	Ras-related protein RABA3	GO:0005525;GO:0003924	AT1G01200	-5.03191118594654	0.00739243317227485
Cc01_g07050	GSCOC_T00030125001	A0A068UNA9	Protein of Unknown Function (DUF239)			-5.01965564827789	0.000215583628096083
Cc00_g14150	GSCOC_T00009209001	A0A068VJX3	Protein COBRA	GO:0031225;GO:0010215	AT5G60920	-4.99637196610832	1.45581340787542e-08
Cc10_g09410	GSCOC_T00031548001	A0A068UR78	Putative Protein AIG1	GO:0005525	AT1G33970	-4.99546795762191	1.24122824591183e-09
Cc02_g23060	GSCOC_T00014985001	A0A068TNM1	Lactoylglutathione lyase / glyoxalase I family protein			-4.98567491975967	1.58745893926388e-11
Cc05_g07760	GSCOC_T00016777001	A0A068V518	Receptor-like protein kinase HSL1	GO:0016021;GO:0005524;GO:0004674	AT1G28440	-4.96837413607889	0.00223589475457701
Cc02_g02650	GSCOC_T00020126001	A0A068U9L2	Short-chain dehydrogenase TIC 32, chloroplastic			-4.96647269634916	0.00519823261891775
Cc08_g09450	GSCOC_T00026884001	A0A068UIV9	Putative UPF0481 protein At3g02645	GO:0016021		-4.9620434243307	2.93576890343153e-20
Cc10_g07690	GSCOC_T00034491001	A0A068TY52	Putative uncharacterized protein	GO:0005634;GO:0003677;GO:0003700	AT4G37750	-4.96141770710235	0.001541909686836
Cc02_g21770	GSCOC_T00014823001	A0A068TQ32	Putative uncharacterized protein	GO:0046872;GO:0030001	AT5G02600	-4.91408770497974	0.000202674409351058
Cc08_g16380	GSCOC_T00035596001	A0A068UX71	Putative Protein ABIL3		AT5G24310	-4.91157297349983	7.67508655386583e-14
Cc01_g04320	GSCOC_T00004449001	A0A068VA33	Putative Lysosomal Pro-X carboxypeptidase	GO:0008236		-4.90924760498324	1.90299852029656e-19
Cc11_g16780	GSCOC_T00038225001	A0A068UYE9	Putative Probable inactive leucine-rich repeat receptor-like protein kinase At1g66830	GO:0016021;GO:0005524;GO:0004672		-4.90839275858883	5.18104345671935e-05
Cc04_g12200	GSCOC_T00005269001	A0A068V8N8	unknown protein; FUNCTIONS IN	GO:0016021		-4.88256767434532	2.27832365243189e-20
Cc02_g28930	GSCOC_T00018193001	A0A068V6G0	Serine carboxypeptidase-like 40	GO:0004185	AT3G63470	-4.87798914250257	0.00788181541394675
Cc03_g12870	GSCOC_T00030645001	A0A068UNE4	Calmodulin-like protein 5	GO:0005509	AT3G07490	-4.86792293851923	2.29203623860031e-06
Cc02_g07570	GSCOC_T00029920001	A0A068TV07	Putative Aspartic proteinase nepenthesin-1	GO:0004190		-4.86259072555457	0.00062710127947247
Cc08_g06750	GSCOC_T00005866001	A0A068VGP2	Putative Protein ASPARTIC PROTEASE IN GUARD CELL 2	GO:0004190		-4.85903545011237	6.31672988357314e-07
Cc00_g08510	GSCOC_T00005634001	A0A068VHY4	Putative Cellulose synthase-like protein G2	GO:0016021;GO:0016760;GO:0071555;GO:0030244	AT4G24000	-4.85591016094469	4.86669169831321e-08
Cc02_g07670	GSCOC_T00029906001	A0A068TUZ4	Expansin-A4	GO:0005618;GO:0005576;GO:0016020;GO:0009664	AT2G39700	-4.85276045654996	4.01058938327271e-14
Cc08_g14000	GSCOC_T00030276001	A0A068UNJ4	BAG family molecular chaperone regulator 3	GO:0051087	AT5G07220	-4.84781826467309	3.52412355748993e-14
Cc10_g09750	GSCOC_T00031505001	A0A068UQB9	Probable peptide/nitrate transporter At1g22540	GO:0016021;GO:0022857	AT1G22540	-4.84570274948155	1.7006857549459e-07
Cc09_g00350	GSCOC_T00017960001	A0A068UA88	Putative Pollen Ole e 1 allergen and extensin family protein			-4.8449166028123	0.0014307591287559
Cc05_g10050	GSCOC_T00021507001	A0A068UD54	Putative Protein kinase G11A	GO:0005524;GO:0004672	AT1G53700	-4.84322601724788	9.51170731160836e-05
Cc01_g08180	GSCOC_T00015510001	A0A068V505	Putative Receptor-like protein 12	GO:0016021	AT2G33030	-4.83538609444534	2.85992762453377e-05
Cc08_g02440	GSCOC_T00037718001	A0A068UZB9	NAC domain containing protein 71	GO:0005634;GO:0003677;GO:0006355	AT4G17980	-4.8280497713248	2.52034910641556e-05
Cc02_g05610	GSCOC_T00039074001	A0A068UZF9	Putative uncharacterized protein			-4.82759120578229	0.000535725130892672
Cc04_g03110	GSCOC_T00022000001	A0A068TNW5	Putative unknown protein; FUNCTIONS IN	GO:0016021		-4.82677280914304	5.2237733643671e-10
Cc01_g08480	GSCOC_T00006217001	A0A068VJI6	Putative Aspartic proteinase nepenthesin-1	GO:0004190		-4.81485599049441	0.000109524733337777
Cc02_g39700	GSCOC_T00027679001	A0A068UK98	Calcium-transporting ATPase, endoplasmic reticulum-type	GO:0016021;GO:0005524	AT4G00900	-4.78027950641989	0.000124833790198618
Cc02_g39930	GSCOC_T00027640001	A0A068UJI2	Putative unknown protein; FUNCTIONS IN			-4.76666640274211	0.00851118009898889
Cc10_g13710	GSCOC_T00035247001	A0A068UTQ8	Protein kinase protein with adenine nucleotide alpha hydrolases-like domain	GO:0005524;GO:0004672	AT1G23540	-4.75501057845826	0.000123645049474636
Cc08_g02990	GSCOC_T00037803001	A0A068UZH7	Putative Bifunctional dihydroflavonol 4-reductase/flavanone 4-reductase			-4.75445672491994	5.17122820594442e-16
Cc00_g19250	GSCOC_T00011839001	A0A068VLH4	Hypothetical protein	GO:0016021		-4.74274079289266	0.00958465471373598
Cc01_g17230	GSCOC_T00016350001	A0A068U8B5	Tetratricopeptide repeat (TPR)-like superfamily protein	GO:0010438;GO:0010439;GO:0006792	AT5G48850	-4.73833874320557	6.843714093303e-06
Cc11_g10570	GSCOC_T00032560001	A0A068TX04	Putative leucine-rich repeat receptor-like serine/threonine-protein kinase At2g14440	GO:0005768;GO:0016021;GO:0005886;GO:0005802;GO:0005773		-4.73541935567981	2.24944347893817e-11
Cc08_g02650	GSCOC_T00037746001	A0A068UXM5	Putative Probable carboxylesterase 120	GO:0016787		-4.72613328860068	1.95777173242989e-05
Cc07_g00630	GSCOC_T00019141001	A0A068V7C9	Putative Probable inactive leucine-rich repeat receptor-like protein kinase At3g03770	GO:0016021;GO:0005524;GO:0004672	AT3G03770	-4.70300781262304	1.82320916379115e-06
Cc10_g06870	GSCOC_T00034602001	A0A068TYT7	Phosphate-responsive 1 family protein			-4.70277717810352	0.00332129811941259
Cc09_g05650	GSCOC_T00033436001	A0A068UUJ8	Putative Probable LRR receptor-like serine/threonine-protein kinase At3g47570	GO:0016021;GO:0005524;GO:0004674		-4.69059413998921	0.00168242818583622
Cc10_g08020	GSCOC_T00034451001	A0A068TYG8	Tubulin alpha-2 chain	GO:0005737;GO:0005874;GO:0005525;GO:0003924;GO:0005200;GO:0007017	AT4G14960	-4.68708785237629	1.06356420694539e-05
Cc04_g02390	GSCOC_T00021910001	A0A068TRG2	GDSL esterase/lipase APG	GO:0016788	AT3G16370	-4.68591932295383	8.56236113918488e-20
Cc06_g21770	GSCOC_T00015575001	A0A068V6U7	Putative uncharacterized protein			-4.68538468138051	0.000207096097880236
Cc07_g09400	GSCOC_T00037248001	A0A068U1I6	Sulfite exporter TauE/SafE family protein	GO:0016021	AT2G25737	-4.65792098731695	4.32272002300087e-09
Cc00_g12980	GSCOC_T00005422001	A0A068VG81	8-hydroxyquercetin 8-O-methyltransferase	GO:0008171;GO:0046983;GO:0032259		-4.6515673683713	4.32393287347351e-39
Cc02_g15130	GSCOC_T00013948001	A0A068TLK4	Probable LRR receptor-like serine/threonine-protein kinase MRH1	GO:0016021;GO:0005524;GO:0004672		-4.65124970742904	0.000737071544475184
Cc06_g11950	GSCOC_T00041595001	A0A068U671	photosystem II subunit X	GO:0009535;GO:0016021;GO:0009523;GO:0019904;GO:0015979		-4.64259296410225	3.12786553155115e-37
Cc10_g12870	GSCOC_T00035375001	A0A068UUS3	Serine carboxypeptidase-like 42	GO:0004185	AT5G42240	-4.63578830373197	1.45696045644579e-05
Cc11_g17510	GSCOC_T00038325001	A0A068UXY2	Acyl carrier protein 1, chloroplastic	GO:0009941;GO:0009570;GO:0031177;GO:0006633;GO:0009416	AT1G54630	-4.61806734037067	2.13964627458476e-14
Cc05_g14940	GSCOC_T00038756001	A0A068UZL1	Fasciclin-like arabinogalactan protein 1	GO:0046658;GO:0005618;GO:0048364;GO:0048367	AT5G55730	-4.61503588184	2.6885248469125e-07
Cc08_g10760	GSCOC_T00027054001	A0A068UIB9	Beta-fructofuranosidase, insoluble isoenzyme CWINV1	GO:0004553;GO:0005975		-4.60337334519442	0.00513386445460477
Cc02_g03720	GSCOC_T00020265001	A0A068UCC3	Alpha-L-fucosidase 1	GO:0004560;GO:0006004	AT2G28100	-4.58573180336193	3.04897457272014e-15
Cc06_g12120	GSCOC_T00041574001	A0A068U3K3	Acyl-CoA N-acyltransferases (NAT) superfamily protein	GO:0008080		-4.58099373547815	0.00838294875715908
Cc01_g14500	GSCOC_T00028449001	A0A068UNQ8	Protein CHUP1, chloroplastic			-4.57731947378108	3.38332548066202e-11
Cc10_g14430	GSCOC_T00006176001	A0A068VFY4	Cupredoxin superfamily protein			-4.56333196767384	0.00342058837554712
Cc11_g12830	GSCOC_T00032263001	A0A068TVS4	Expansin-A1	GO:0005618;GO:0005576;GO:0016021;GO:0009664	AT2G03090	-4.56238064937398	6.54161518455032e-05
Cc02_g21890	GSCOC_T00014839001	A0A068TMB6	Putative NAC domain-containing protein 71	GO:0005634;GO:0003677;GO:0006355		-4.55452708535489	0.00633396068305288
Cc02_g02580	GSCOC_T00020116001	A0A068UAE6	BAHD acyltransferase DCR	GO:0005737;GO:0016747;GO:0010143;GO:0051179;GO:0010090	AT5G23940	-4.55233416435724	5.32643714590964e-06
Cc07_g02210	GSCOC_T00039404001	A0A068U0S2	Tetratricopeptide repeat (TPR)-like superfamily protein			-4.55124014180627	0.00196426413341062
Cc02_g17620	GSCOC_T00014282001	A0A068TNW7	Glucan endo-1,3-beta-glucosidase 7	GO:0004553;GO:0005975	AT4G34480	-4.54362053550048	3.87026376560825e-09
Cc07_g02160	GSCOC_T00039398001	A0A068U0R6	Carbonic anhydrase, chloroplastic	GO:0004089;GO:0008270;GO:0015976	AT3G01500	-4.5425577771883	2.25438560232331e-27
Cc01_g21620	GSCOC_T00004958001	A0A068V8S9	Long chain acyl-CoA synthetase 1	GO:0003824	AT2G47240	-4.50956640091507	2.17026219574351e-27
Cc02_g14650	GSCOC_T00013883001	A0A068TKQ7	TRICHOME BIREFRINGENCE-LIKE 38			-4.49592197496848	6.67897268148003e-12
Cc10_g15940	GSCOC_T00033799001	A0A068USI4	Putative HXXXD-type acyl-transferase family protein	GO:0016747		-4.49314458950353	1.83353627223748e-07
Cc10_g09230	GSCOC_T00034272001	A0A068TZQ8	Protein of unknown function (DUF579)	GO:0045492	AT1G33800	-4.47860892729379	4.62295411954176e-11
Cc01_g11270	GSCOC_T00024252001	A0A068UFT2	Beta-galactosidase 8	GO:0004565;GO:0030246;GO:0005975	AT2G28470	-4.47845997478829	1.30501740708051e-16
Cc11_g02980	GSCOC_T00025493001	A0A068UHB1	Interactor of constitutive active ROPs 2, chloroplastic		AT2G37080	-4.46245418959244	0.00923807375497812
Cc02_g31950	GSCOC_T00027468001	A0A068UJ73	Putative UDP-glycosyltransferase 83A1	GO:0008194	AT3G02100	-4.45876248672923	3.22357738637924e-08
Cc01_g17250	GSCOC_T00016348001	A0A068U5T5	Putative uncharacterized protein			-4.45669497052388	1.85036009247539e-07
Cc06_g20050	GSCOC_T00022903001	A0A068UDG9	plectin-related	GO:0003779;GO:0007015;GO:0010119	AT2G26770	-4.45402085014636	0.00507530188211896
Cc02_g11770	GSCOC_T00029373001	A0A068TTV8	Oxygen-evolving enhancer protein 3-2, chloroplastic	GO:0019898;GO:0009654;GO:0005509;GO:0015979	AT4G05180	-4.43793823484738	4.50340316629117e-33
Cc06_g07710	GSCOC_T00031225001	A0A068UPK9	Heparanase-like protein 3	GO:0016021;GO:0016798	AT5G34940	-4.43787046638222	2.43685361773565e-08
Cc05_g00210	GSCOC_T00017046001	A0A068V5J0	Putative Glutamate receptor 2.7	GO:0016021;GO:0015276		-4.42885684659811	0.000322590439548794
Cc04_g07360	GSCOC_T00022550001	A0A068TQ54	Putative Protein ASPARTIC PROTEASE IN GUARD CELL 1	GO:0004190;GO:0009737;GO:0009414	AT3G18490	-4.4262580919664	9.42975820302496e-06
Cc08_g08440	GSCOC_T00009035001	A0A068VFK3	Dehydration-responsive protein RD22			-4.42245438562075	0.00137884229801614
Cc02_g15110	GSCOC_T00013945001	A0A068TLF7	Putative Protein of unknown function (DUF688)			-4.41790211724741	8.2315572983668e-10
Cc05_g06490	GSCOC_T00042139001	A0A068V2F6	Putative Probable disease resistance protein At4g27220	GO:0043531		-4.41709804771949	0.00864494726531742
Cc03_g08990	GSCOC_T00042733001	A0A068V5J4	Putative Probable carboxylesterase 7	GO:0016787	AT2G03550	-4.4162855874551	0.000300813010740507
Cc00_g29880	GSCOC_T00006934001	A0A068VLT8	8-hydroxyquercetin 8-O-methyltransferase	GO:0008171;GO:0046983;GO:0032259		-4.40808400675336	5.59953130584378e-35
Cc09_g01560	GSCOC_T00017793001	A0A068U7X6	5'-adenylylsulfate reductase 3, chloroplastic	GO:0016671;GO:0019419	AT4G21990	-4.40164987679304	1.97283828971471e-41
Cc07_g00610	GSCOC_T00019139001	A0A068V9R8	Putative Ankyrin-2			-4.39830359924109	0.000950994590549687
Cc09_g00150	GSCOC_T00017985001	A0A068UAA4	Hypothetical protein			-4.39221456036575	7.83251165612799e-05
Cc07_g08060	GSCOC_T00040168001	A0A068U2J6	Putative Proteasome, subunit alpha/beta	GO:0005839;GO:0004298;GO:0051603		-4.38650682794232	1.37043586292978e-09
Cc02_g16180	GSCOC_T00014095001	A0A068TLV1	GDSL esterase/lipase At1g29660	GO:0016788	AT1G29670	-4.38511381814035	0.00124111194890321
Cc08_g14790	GSCOC_T00035388001	A0A068UUT4	Putative Transcription factor GLABRA 3	GO:0046983		-4.38105418813623	0.00317061572917515
Cc05_g15350	GSCOC_T00038702001	A0A068UZ75	Probable LRR receptor-like serine/threonine-protein kinase At4g26540	GO:0016021;GO:0005524;GO:0004674	AT4G26540	-4.37678610714353	6.34203877803871e-06
Cc07_g14270	GSCOC_T00036634001	A0A068TZQ5	unknown protein; FUNCTIONS IN			-4.36729294498247	0.00396079581325517
Cc00_g17020	GSCOC_T00005618001	A0A068VI55	Putative uncharacterized protein			-4.36558135427324	2.63633625006027e-05
Cc02_g06220	GSCOC_T00039148001	A0A068UZZ2	Putative Omega-hydroxypalmitate O-feruloyl transferase	GO:0016747		-4.36380720079573	0.00334430540576986
Cc06_g11940	GSCOC_T00041597001	A0A068U4N0	Putative Mechanosensitive ion channel protein 10	GO:0016021;GO:0055085	AT5G12080	-4.3554701993827	0.000872899706761459
Cc07_g14030	GSCOC_T00036664001	A0A068TZ79	Nucleobase-ascorbate transporter 11	GO:0016021;GO:0005886;GO:0022857	AT4G38050	-4.34387125401734	2.66798199453886e-11
Cc07_g06680	GSCOC_T00039985001	A0A068U4M6	Arabinogalactan			-4.33469028311167	1.46790689332321e-12
Cc02_g36950	GSCOC_T00003852001	A0A068VDK2	Nectarin-1	GO:0048046;GO:0005618;GO:0030145;GO:0045735	AT3G62020	-4.32852980587932	1.1075560576002e-06
Cc06_g17550	GSCOC_T00040335001	A0A068UZZ5	Putative Probable leucine-rich repeat receptor-like protein kinase At1g35710	GO:0005524;GO:0004672		-4.32311497777814	0.00149068864626557
Cc00_g06800	GSCOC_T00007409001	A0A068VDI8	Fasciclin-like arabinogalactan protein 2	GO:0005886;GO:0005774	AT4G12730	-4.31311493087208	6.04480878716194e-17
Cc01_g18410	GSCOC_T00016208001	A0A068U5C2	Putative Hyoscyamine 6-dioxygenase	GO:0046872;GO:0016491		-4.31206311536589	0.00409255448590085
Cc07_g18080	GSCOC_T00018805001	A0A068U985	Probable pectinesterase/pectinesterase inhibitor 51	GO:0045330;GO:0004857;GO:0030599;GO:0042545;GO:0045490		-4.29286471075651	6.5620985488026e-16
Cc09_g06760	GSCOC_T00005134001	A0A068VA94	Putative E3 ubiquitin-protein ligase LIN			-4.29016888989437	2.96609114020093e-16
Cc10_g01440	GSCOC_T00024615001	A0A068UGN6	ABC transporter B family member 13	GO:0016021;GO:0005524;GO:0016887;GO:0042626	AT1G27940	-4.28806534178983	0.000399244463567576
Cc07_g00050	GSCOC_T00019067001	A0A068V7T4	GDSL esterase/lipase At5g14450	GO:0016788	AT5G14450	-4.2839495824472	0.00141379534781336
Cc06_g12230	GSCOC_T00041563001	A0A068U3E7	Subtilisin-like protease	GO:0005618;GO:0005794;GO:0009506;GO:0004252	AT2G05920	-4.28122894478287	1.67844863817655e-10
Cc03_g15190	GSCOC_T00026785001	A0A068UIG5	Putative UDP-glycosyltransferase 74E1	GO:0008194	AT1G05675	-4.27998546380568	2.48548250269904e-05
Cc11_g05710	GSCOC_T00020539001	A0A068UCV4	Hypothetical protein			-4.27415473022724	1.20457876104597e-08
Cc02_g33320	GSCOC_T00015359001	A0A068V4P9	Probable linoleate 9S-lipoxygenase 5	GO:0046872;GO:0016702;GO:0031408	AT1G55020	-4.25170144076313	2.63884483765695e-06
Cc08_g03880	GSCOC_T00034185001	A0A068UTJ6	Putative CASP-like protein RCOM_1206790	GO:0016021;GO:0005886		-4.24592198180286	0.00583145354160475
Cc02_g32500	GSCOC_T00001237001	A0A068VB71	Putative Sugar transporter ERD6-like 5	GO:0016021;GO:0022857	AT1G54730	-4.24081240430033	3.4854444052332e-07
Cc11_g06940	GSCOC_T00020732001	A0A068UAS7	RNA-dependent RNA polymerase 1	GO:0003723;GO:0003968;GO:0031047	AT1G14790	-4.23109365178956	1.69815027355099e-15
Cc05_g09040	GSCOC_T00002679001	A0A068VD58	Probable LRR receptor-like serine/threonine-protein kinase At1g07650	GO:0016021;GO:0005524;GO:0004672		-4.2304953807967	9.38996050908898e-09
Cc00_g16430	GSCOC_T00005624001	A0A068VHQ2	8-hydroxyquercetin 8-O-methyltransferase	GO:0008171		-4.22681566520711	8.46780349802707e-06
Cc02_g37110	GSCOC_T00028036001	A0A068UMQ4	SPX domain-containing membrane protein At4g22990	GO:0016021;GO:0022857	AT4G11810	-4.22571789997528	6.63356383264273e-06
Cc01_g14410	GSCOC_T00028439001	A0A068ULX5	Plant protein of unknown function (DUF828)		AT5G58600	-4.22396537797921	3.27893814275067e-05
Cc06_g03720	GSCOC_T00023662001	A0A068UE44	L-type lectin-domain containing receptor kinase VIII.1	GO:0016021;GO:0005524;GO:0030246;GO:0004672		-4.22287434261574	0.00161477404647717
Cc10_g01860	GSCOC_T00024675001	A0A068UG08	Auxin-induced protein 15A	GO:0009733	AT4G34760	-4.21422724792262	0.00420601862913446
Cc00_g02160	GSCOC_T00001858001	A0A068V9N6	Hypothetical protein			-4.19338095442655	0.00633396068305288
Cc10_g09170	GSCOC_T00034285001	A0A068TY49	Putative Cytochrome P450 82C4	GO:0020037;GO:0005506;GO:0004497;GO:0016705	AT4G31940	-4.18802204280546	0.00129384141884654
Cc06_g21530	GSCOC_T00008024001	A0A068VA13	Core-2/I-branching beta-1,6-N-acetylglucosaminyltransferase family protein	GO:0016020;GO:0009567;GO:0048868	AT5G39990	-4.18747671013048	3.71029132302134e-07
Cc04_g16710	GSCOC_T00035779001	A0A068UVN1	Hypothetical protein			-4.18501714726577	0.00138130936576994
Cc01_g21630	GSCOC_T00004957001	A0A068V8D1	Long chain acyl-CoA synthetase 1	GO:0003824	AT2G47240	-4.18421225989102	2.60871865893226e-10
Cc04_g07650	GSCOC_T00022597001	A0A068TRA5	Cyclophilin-like peptidyl-prolyl cis-trans isomerase family protein	GO:0003755	AT1G74070	-4.18134064081794	5.12110482145001e-06
Cc03_g03660	GSCOC_T00026061001	A0A068TSM4	Primary amine oxidase	GO:0005507;GO:0008131;GO:0048038;GO:0009308	AT4G14940	-4.17824914973416	7.02322372811296e-05
Cc08_g01760	GSCOC_T00038338001	A0A068UYL6	Putative invertase inhibitor	GO:0004857		-4.17683002937512	0.00672993224473587
Cc11_g05720	GSCOC_T00020540001	A0A068UB94	65-kDa microtubule-associated protein 7	GO:0008017;GO:0000226	AT1G14690	-4.16392742806024	8.40229383743142e-20
Cc04_g09420	GSCOC_T00022830001	A0A068TQZ5	Putative uncharacterized protein	GO:0046983;GO:0006355	AT5G50915	-4.16053083451893	1.4805672466447e-19
Cc05_g13060	GSCOC_T00021109001	A0A068UDW2	(-)-germacrene D synthase	GO:0000287;GO:0010333	AT5G23960	-4.14859045779809	0.00237615075951412
Cc06_g09880	GSCOC_T00041856001	A0A068U445	Putative uncharacterized protein			-4.14429838030669	0.000125286521308875
Cc03_g15040	GSCOC_T00026761001	A0A068UIE7	Putative uncharacterized protein	GO:0016021	AT3G25500	-4.13721257604868	3.37121943137999e-10
Cc07_g17470	GSCOC_T00037426001	A0A068UYS7	Putative G-type lectin S-receptor-like serine/threonine-protein kinase RLK1	GO:0016021;GO:0005524;GO:0004674;GO:0048544		-4.12740508244733	0.00169435763270784
Cc02_g17440	GSCOC_T00014259001	A0A068TL36	Putative Transcription factor bHLH63	GO:0046983;GO:0006355		-4.12566195755803	0.000208881895097013
Cc00_g06220	GSCOC_T00010066001	A0A068VDL5	Putative uncharacterized protein	GO:0016021		-4.12375493953402	0.00920029445452749
Cc04_g01110	GSCOC_T00021745001	A0A068TNB8	Lung seven transmembrane receptor family protein	GO:0016021		-4.12122089076135	3.31604770553866e-06
Cc07_g18170	GSCOC_T00018787001	A0A068U872	Hypothetical protein	GO:0046872;GO:0030001		-4.11845373945255	9.20718376411395e-11
Cc08_g13880	GSCOC_T00030292001	A0A068UN02	Protein HOTHEAD	GO:0050660;GO:0016614	AT1G72970	-4.11713637686961	1.22292421070651e-10
Cc02_g09850	GSCOC_T00029601001	A0A068TV18	Putative Major facilitator superfamily protein	GO:0016021;GO:0022857		-4.11082670259713	1.00508513187464e-05
Cc09_g00420	GSCOC_T00017952001	A0A068U7N1	Oligopeptide transporter 3	GO:0016021;GO:0055085	AT4G16370	-4.11040060145258	3.93867692351533e-28
Cc07_g03350	GSCOC_T00039562001	A0A068U129	Myb-related protein 306	GO:0005634;GO:0003677;GO:0009626;GO:0009617;GO:0001666;GO:0042761		-4.10943911653954	0.00243977018240757
Cc08_g02640	GSCOC_T00037744001	A0A068UZE1	Putative Carboxylesterase 1	GO:0016787		-4.09259302258751	0.000718155739683364
Cc01_g12000	GSCOC_T00028119001	A0A068UMW8	Putative 125 kDa kinesin-related protein	GO:0005524;GO:0008017;GO:0003777;GO:0007018	AT3G45850	-4.09253255533178	3.61734308606559e-14
Cc05_g11180	GSCOC_T00021348001	A0A068UBX9	Phosphoenolpyruvate carboxylase	GO:0008964;GO:0015977;GO:0006099	AT3G14940	-4.08121672697266	4.1300151313431e-08
Cc02_g21960	GSCOC_T00014847001	A0A068TN94	Peroxidase 43	GO:0005576;GO:0020037;GO:0046872;GO:0004601;GO:0042744;GO:0006979		-4.08110446136188	8.6060416489713e-10
Cc02_g05600	GSCOC_T00039073001	A0A068V082	Putative WEB family protein At2g38370		AT2G40480	-4.07524337684357	1.27715234144377e-05
Cc04_g08320	GSCOC_T00022688001	A0A068TQL0	Putative Subtilisin-like protease	GO:0004252	AT4G30020	-4.07359992053081	5.40089461728993e-08
Cc04_g08060	GSCOC_T00022654001	A0A068TQB6	Tropinone reductase homolog At1g07440		AT5G06060	-4.07114488812049	0.00383368058353675
Cc00_g05240	GSCOC_T00010363001	A0A068VDH3	Putative Probable LRR receptor-like serine/threonine-protein kinase At4g08850	GO:0016021;GO:0005524;GO:0004672	AT1G35710	-4.07034845713441	0.00525801506372586
Cc06_g17600	GSCOC_T00040342001	A0A068V000	Putative unknown protein; FUNCTIONS IN	GO:0016021		-4.06968490823584	4.03605863389373e-08
Cc02_g33660	GSCOC_T00015406001	A0A068V6K7	Putative Subtilisin-like protease	GO:0004252		-4.05790828178	1.06521594255897e-05
Cc04_g11650	GSCOC_T00037367001	A0A068UWT4	Pathogenesis-related leaf protein 6	GO:0005576		-4.05505596303484	8.61350610014094e-10
Cc02_g14990	GSCOC_T00013928001	A0A068TKJ0	Non-specific lipid-transfer protein	GO:0008289;GO:0006869	AT5G59320	-4.05248790343257	4.48443955632246e-08
Cc11_g15750	GSCOC_T00038093001	A0A068UYC7	Putative Octicosapeptide/Phox/Bem1p family protein			-4.0458663370141	0.00186368883226554
Cc02_g39490	GSCOC_T00027708001	A0A068UJF8	AP2/ERF domain-containing transcription factor	GO:0005634;GO:0003677;GO:0003700	AT1G01250	-4.04268154740281	0.00335736689908519
Cc07_g12310	GSCOC_T00036890001	A0A068U2C6	Diacylglycerol O-acyltransferase 2	GO:0016021;GO:0016747	AT3G51520	-4.04150678976711	2.28123084360913e-25
Cc11_g05690	GSCOC_T00020534001	A0A068UAF7	Putative UDP-glycosyltransferase 83A1	GO:0008194	AT3G02100	-4.04089781766627	0.00257756370829751
Cc04_g05440	GSCOC_T00022295001	A0A068TSE7	Protein WAX2	GO:0016021;GO:0005506;GO:0016491;GO:0008610	AT5G57800	-4.03593770072012	2.81938264756484e-10
Cc03_g11020	GSCOC_T00042054001	A0A068V1K3	Kirola	GO:0006952	AT1G70830	-4.02958635534037	5.74790572515383e-07
Cc07_g04950	GSCOC_T00039756001	A0A068U1H5	Putative TRICHOME BIREFRINGENCE-LIKE 19	GO:0016021		-4.02613300901532	5.03896183979552e-07
Cc08_g10430	GSCOC_T00027010001	A0A068UJ03	Pollen-specific protein SF21	GO:0016021;GO:2000012;GO:0009737;GO:0009409;GO:0009753		-4.01529113769732	4.197317219992e-26
Cc07_g00260	GSCOC_T00019092001	A0A068V9L0	Chlorophyll a-b binding protein 13, chloroplastic	GO:0009535;GO:0016021;GO:0009522;GO:0009523;GO:0016168;GO:0009765;GO:0018298	AT5G54270	-4.00967411139922	9.19359477086903e-05
Cc04_g00690	GSCOC_T00021692001	A0A068TR01	Pectinesterase 3	GO:0005618;GO:0005576;GO:0016021;GO:0045330;GO:0004857;GO:0030599;GO:0042545;GO:0045490		-4.00750323794741	3.71187663095602e-06
Cc02_g04100	GSCOC_T00020313001	A0A068UA16	21 kDa protein	GO:0004857	AT3G47380	-4.00214389822227	1.58398275147334e-06
Cc03_g05470	GSCOC_T00026303001	A0A068TV80	Putative Phosphoenolpyruvate carboxylase kinase 1	GO:0005524;GO:0004674	AT1G08650	-4.0005518313029	0.00317061572917515
Cc02_g05130	GSCOC_T00039013001	A0A068UZZ4	Probable inactive receptor kinase At5g58300	GO:0016021;GO:0005524;GO:0004672	AT5G58300	-4.00018682653066	3.96773404176511e-09
Cc06_g01510	GSCOC_T00023372001	A0A068UD59	Auxin transporter-like protein 2	GO:0016021	AT2G38120	-3.9938110905342	3.1440961778632e-14
Cc03_g08590	GSCOC_T00033286001	A0A068UUD3	Hypothetical protein			-3.99138090504547	7.62830463668561e-06
Cc02_g04550	GSCOC_T00020372001	A0A068UA56	Hexose carrier protein HEX6	GO:0016021;GO:0022857	AT5G61520	-3.99025604826029	0.00851118009898889
Cc00_g25070	GSCOC_T00002590001	A0A068VKN0	Endoglucanase 12	GO:0016021;GO:0008810;GO:0030245	AT1G65610	-3.97851570197578	0.00144361105720708
Cc06_g06460	GSCOC_T00031380001	A0A068UPZ6	NDR1/HIN1-like 1	GO:0016021	AT3G11660	-3.97379686712808	6.94161995435362e-13
Cc07_g07190	GSCOC_T00040057001	A0A068U382	Putative unknown protein; FUNCTIONS IN			-3.97316892702657	1.19949213708947e-11
Cc10_g01010	GSCOC_T00024564001	A0A068UFU0	High mobility group B protein 9	GO:0005634;GO:0003677	AT1G76110	-3.9714078441118	8.10332254193057e-05
Cc04_g09340	GSCOC_T00022817001	A0A068TTJ5	Potassium channel SKOR	GO:0016021;GO:0005249;GO:0034765	AT3G02850	-3.96871748303766	4.92867498872441e-08
Cc11_g08480	GSCOC_T00032866001	A0A068TX31	Putative Protein PLANT CADMIUM RESISTANCE 2		AT1G14870	-3.96146713913191	3.4920693622294e-25
Cc10_g05010	GSCOC_T00034863001	A0A068TYA9	Pollen-specific protein SF3	GO:0046872	AT1G10200	-3.96063698680255	1.59243347358285e-05
Cc04_g13580	GSCOC_T00018263001	A0A068V6V3	Putative Vegetative incompatibility protein HET-E-1			-3.95830445510843	3.2911643539412e-05
Cc03_g14910	GSCOC_T00026740001	A0A068UIK9	Putative UPF0481 protein At3g02645	GO:0016021		-3.95645883281575	2.01579352438888e-05
Cc08_g15060	GSCOC_T00035430001	A0A068UUF6	Putative phosphoglycerate mutase DET1	GO:0003824	AT3G05170	-3.95313273518421	8.80266240557967e-14
Cc02_g38700	GSCOC_T00027825001	A0A068UKL1	Putative uncharacterized protein			-3.95291309061668	1.19222890767462e-12
Cc00_g05670	GSCOC_T00011952001	A0A068VD26	Putative uncharacterized protein		AT4G34880	-3.95222295664907	3.46347545295017e-09
Cc04_g08440	GSCOC_T00022703001	A0A068TT83	Probable metal-nicotianamine transporter YSL7	GO:0016021;GO:0055085		-3.95073733322375	3.92390068306513e-14
Cc10_g01110	GSCOC_T00024577001	A0A068UFU7	Putative Major facilitator superfamily protein	GO:0016021;GO:0022857		-3.94577247100961	3.67073071756576e-07
Cc02_g11580	GSCOC_T00029393001	A0A068TUV1	Uncharacterized protein		AT4G04900	-3.93875991219313	3.0164328772357e-11
Cc00_g29330	GSCOC_T00011480001	A0A068VLE5	Putative Predicted protein			-3.93778111410906	0.000280664982023851
Cc01_g05180	GSCOC_T00011472001	A0A068VA14	Omega-6 fatty acid desaturase, endoplasmic reticulum isozyme 2	GO:0016021;GO:0016717;GO:0006629	AT3G12120	-3.9372280530685	3.57303861910422e-17
Cc00_g12370	GSCOC_T00013520001	A0A068VGU3	Putative uncharacterized protein	GO:0010112		-3.92689190470654	0.00351621030821081
Cc00_g14140	GSCOC_T00004713001	A0A068VH92	Dynamin-related protein 4C	GO:0005525;GO:0003924	AT1G60500	-3.92393142205917	0.00149687199558948
Cc02_g29000	GSCOC_T00011527001	A0A068VI04	Protein of unknown function (DUF288)	GO:0016021	AT2G41770	-3.9131491487614	1.42177168562013e-13
Cc04_g14900	GSCOC_T00040775001	A0A068V3D3	Putative Uncharacterized protein At5g01610		AT5G01610	-3.91205641054672	2.95808674583373e-08
Cc05_g00780	GSCOC_T00013169001	A0A068VDT0	Acidic endochitinase	GO:0004553;GO:0005975	AT5G24090	-3.91169336054094	1.58130280603172e-13
Cc05_g16580	GSCOC_T00038542001	A0A068V0X8	Protein of unknown function (DUF620)			-3.90810137846552	0.00452994954762751
Cc00_g05030	GSCOC_T00000057001	A0A068VCD8	Putative Probably inactive leucine-rich repeat receptor-like protein kinase At2g25790	GO:0048046	AT1G58170	-3.90729774441994	1.41232925013274e-06
Cc07_g08570	GSCOC_T00040236001	A0A068U392	Non-specific lipid-transfer protein 2	GO:0006869		-3.90581363182182	6.18414296248083e-05
Cc00_g18770	GSCOC_T00008464001	A0A068VI08	Putative kinase interacting protein, identical	GO:0003779	AT4G02710	-3.89403155595922	9.38077969100568e-05
Cc05_g11240	GSCOC_T00021340001	A0A068UBQ8	TPR repeat-containing thioredoxin TTL1		AT1G53300	-3.88727584901063	1.11002458161656e-06
Cc05_g15490	GSCOC_T00038686001	A0A068UZE5	Predicted protein	GO:0016021		-3.88709671541514	0.00244593533601571
Cc02_g18970	GSCOC_T00014459001	Q9XGD6	Caffeoyl-CoA O-methyltransferase 1	GO:0008171;GO:0032259	AT4G34050	-3.8837733635422	1.14581767752203e-21
Cc01_g19080	GSCOC_T00016105001	A0A068U7S8	Putative Chlorophyllase-1	GO:0047746;GO:0015996	AT1G19670	-3.87982640302975	0.000116831877671054
Cc05_g09960	GSCOC_T00021519001	A0A068UES8	CASP-like protein VIT_01s0010g01870	GO:0016021;GO:0005886	AT1G17200	-3.87511635921726	2.10551092545597e-05
Cc00_g12110	GSCOC_T00002210001	A0A068VJA8	Protein of unknown function (DUF1118)	GO:0009535;GO:0009515;GO:0016021;GO:0090391;GO:0010196;GO:0045893;GO:0080167;GO:0010027		-3.86812206349623	1.5337556100445e-17
Cc11_g08340	GSCOC_T00032888001	A0A068TWY3	Putative Kirola	GO:0006952		-3.86006843476305	0.00897939986998808
Cc02_g31310	GSCOC_T00027586001	A0A068UJ65	Probable RNA helicase SDE3		AT1G05460	-3.857783833154	0.000168372846702147
Cc06_g09470	GSCOC_T00041911001	A0A068U4C7	Putative Serine incorporator 3	GO:0016021		-3.83839790137724	0.000373623886904399
Cc02_g06400	GSCOC_T00039173001	A0A068V0G5	Omega-3 fatty acid desaturase, chloroplastic	GO:0016021;GO:0006629	AT5G05580	-3.83702666206261	7.12811605211115e-36
Cc02_g00760	GSCOC_T00019870001	A0A084R1I1	Caffeic acid 3-O-methyltransferase	GO:0005737;GO:0005634;GO:0005886;GO:0009506;GO:0017096;GO:0047763;GO:0030744;GO:0033799;GO:0046983;GO:0030755;GO:0051555;GO:0009809;GO:0030187;GO:0032259		-3.83406815018079	5.39280457756808e-06
Cc05_g13360	GSCOC_T00021073001	A0A068UDT3	early nodulin-like protein 9	GO:0009055	AT2G25060	-3.81668965653139	5.67001111885424e-05
Cc03_g06720	GSCOC_T00026489001	A0A068TVI0	Major facilitator superfamily protein	GO:0016021	AT2G33280	-3.81581851429801	0.00024660873904687
Cc10_g02450	GSCOC_T00024747001	A0A068UFY0	Putative Transmembrane protein 136	GO:0016021		-3.80228214709311	1.8438906932949e-08
Cc09_g09010	GSCOC_T00023118001	A0A068UCQ3	Chlorophyll a-b binding protein 21, chloroplastic	GO:0009535;GO:0016021;GO:0009522;GO:0009523;GO:0016168;GO:0009765;GO:0018298		-3.80089906773071	5.39765145330082e-06
Cc04_g04710	GSCOC_T00022204001	A0A068TPI5	Sterile alpha motif (SAM) domain-containing protein			-3.80012897770298	0.00204846368220825
Cc11_g13080	GSCOC_T00032226001	A0A068TVQ5	Putative Protein PHYTOCHROME KINASE SUBSTRATE 3	GO:0009638		-3.80002505468001	0.000111901985923855
Cc07_g06180	GSCOC_T00039914001	A0A068U4H3	Putative Filament-like plant protein 7		AT2G23360	-3.79215576697948	9.51170731160836e-05
Cc06_g04260	GSCOC_T00023738001	A0A068UE04	ABC transporter B family member 1	GO:0016021;GO:0005524;GO:0016887;GO:0042626	AT2G36910	-3.79128265754034	3.40402832188152e-08
Cc08_g13950	GSCOC_T00030283001	A0A068UNJ7	Putative unknown protein; FUNCTIONS IN			-3.7851332128586	1.20663748611548e-06
Cc03_g15200	GSCOC_T00026786001	A0A068UKD2	Putative UDP-glycosyltransferase 74E1	GO:0008194		-3.76284271335521	0.000420817965318406
Cc07_g08590	GSCOC_T00040238001	A0A068U3M4	Putative Probable receptor-like protein kinase At1g67000	GO:0030247		-3.75465007739919	0.00986615518405622
Cc00_g16220	GSCOC_T00013154001	A0A068VHN6	unknown protein; FUNCTIONS IN	GO:0016021		-3.75128908613458	3.88239065820893e-05
Cc03_g01370	GSCOC_T00025749001	A0A068TTZ5	S-adenosyl-L-methionine-dependent methyltransferases superfamily protein			-3.74830231798662	3.06885361410057e-15
Cc08_g07270	GSCOC_T00025342001	A0A068UJR3	Probable LRR receptor-like serine/threonine-protein kinase At1g14390	GO:0016021;GO:0005524;GO:0004672	AT2G02780	-3.74765991688102	3.01961743398803e-17
Cc04_g06870	GSCOC_T00022488001	A0A068TQ75	Reticulon-like protein B9	GO:0005789;GO:0016021		-3.74751175133326	0.00267389244077092
Cc05_g10310	GSCOC_T00021467001	A0A068UEN7	Polyphenol oxidase I, chloroplastic	GO:0004097;GO:0046872;GO:0046148		-3.74620681862148	6.5860243293518e-07
Cc04_g11080	GSCOC_T00037268001	A0A068UW07	Putative Non-specific lipid-transfer protein	GO:0008289;GO:0006869		-3.74054819388989	0.000540864518489227
Cc07_g00640	GSCOC_T00019142001	A0A068V7U0	FUNCTIONS IN	GO:0005886		-3.74041147468427	1.88388900143493e-08
Cc00_g03770	GSCOC_T00002032001	A0A068VBK7	AAA-ATPase 1	GO:0016021;GO:0005524	AT5G40010	-3.74031725989512	0.00113193012623185
Cc01_g09120	GSCOC_T00023956001	A0A068UF44	Ferredoxin-3, chloroplastic	GO:0009507;GO:0051537;GO:0009055;GO:0046872	AT2G27510	-3.73914262775033	9.78584821194417e-12
Cc02_g06770	GSCOC_T00039224001	A0A068V052	Auxin transporter-like protein 2	GO:0016021	AT2G38120	-3.73900038616072	4.11693456176673e-13
Cc00_g31940	GSCOC_T00009627001	A0A068VMP1	UDP-glucuronate 4-epimerase 6	GO:0005768;GO:0016021;GO:0005802;GO:0050832;GO:0050829;GO:0033481	AT3G23820	-3.73217876995088	2.50784499357783e-10
Cc07_g07420	GSCOC_T00040091001	A0A068U2W8	Squalene monooxygenase	GO:0016021;GO:0050660;GO:0004506;GO:0016126	AT1G58440	-3.73089586326763	7.39263177091282e-06
Cc09_g01110	GSCOC_T00017853001	A0A068U815	1-aminocyclopropane-1-carboxylate oxidase	GO:0046872;GO:0016491	AT1G05010	-3.72780190783519	4.49759565644342e-07
Cc05_g13650	GSCOC_T00021035001	A0A068UC52	Calcium-dependent protein kinase isoform 2	GO:0005524;GO:0005509;GO:0004672		-3.71958333992249	6.67139007620528e-08
Cc10_g05460	GSCOC_T00034803001	A0A068TY72	Snakin-1			-3.71470711636126	0.00984753626442787
Cc06_g18940	GSCOC_T00028933001	A0A068UPH1	Putative Strictosidine synthase 1	GO:0016844;GO:0009058	AT2G41290	-3.70921911391246	1.50801174952732e-07
Cc06_g16450	GSCOC_T00030691001	A0A068UP49	nucleolar protein gar2-related			-3.70380823373045	3.38283807874846e-14
Cc08_g06740	GSCOC_T00005865001	A0A068VE54	Putative Aspartic proteinase nepenthesin-2	GO:0004190		-3.67982998270214	3.79815795281475e-22
Cc06_g17380	GSCOC_T00036382001	A0A068UVV9	Probable inactive leucine-rich repeat receptor-like protein kinase At3g03770	GO:0016021;GO:0005524;GO:0004672	AT3G03770	-3.67892621535948	6.78739585703385e-11
Cc03_g03370	GSCOC_T00026021001	A0A068TUJ2	Putative Protein FANTASTIC FOUR 2			-3.67635879903885	0.00170429074999197
Cc04_g02690	GSCOC_T00021947001	A0A068TRJ5	Putative uncharacterized protein			-3.67355928373129	0.000421217349298171
Cc00_g16670	GSCOC_T00000900001	A0A068VHH0	Putative S-norcoclaurine synthase	GO:0006952		-3.66558239028568	0.00607514889629242
Cc02_g19000	GSCOC_T00014462001	A0A068TLZ1	Putative Filament-like plant protein 7			-3.66447893716885	1.24711741658326e-09
Cc02_g26750	GSCOC_T00024978001	A0A068UGG8	Plant protein of unknown function (DUF946)			-3.64499897410344	2.39093045079745e-05
Cc04_g10530	GSCOC_T00042605001	A0A068V2N5	GDSL esterase/lipase At3g48460	GO:0016788	AT3G48460	-3.64338283266734	3.75583197398793e-09
Cc02_g38150	GSCOC_T00027901001	A0A068UKQ2	Cytochrome P450 86A2	GO:0020037;GO:0005506;GO:0004497;GO:0016705	AT2G45970	-3.64204696257596	0.00127782943204218
Cc11_g14290	GSCOC_T00032077001	A0A068TVC1	Cyclin-D1-1	GO:0042025	AT1G70210	-3.64199070648863	1.36092738255012e-05
Cc11_g05230	GSCOC_T00020465001	A0A068UA46	Putative unknown protein; BEST Arabidopsis thaliana protein match is	GO:0007143;GO:0007140	AT5G48720	-3.64039055639444	2.32469650615045e-07
Cc10_g13040	GSCOC_T00035350001	A0A068UUL6	Putative Cyanidin-3-O-glucoside 2-O-glucuronosyltransferase	GO:0008194	AT2G29750	-3.63895426677973	1.52440431425605e-06
Cc05_g11580	GSCOC_T00021297001	A0A068UBU0	Putative Predicted protein	GO:0009507;GO:0010207		-3.63334170557677	2.52115134927226e-05
Cc04_g00650	GSCOC_T00021687001	A0A068TPC5	Putative uncharacterized protein			-3.62925048332285	1.00033914064774e-06
Cc11_g07400	GSCOC_T00018057001	A0A068V6X3	Protein of unknown function (DUF1295)	GO:0016021;GO:0016627;GO:0006629		-3.60980570590238	5.24324183432083e-07
Cc11_g14400	GSCOC_T00032063001	A0A068TWA0	Putative Auxin-induced protein 5NG4	GO:0016021;GO:0022857	AT3G28050	-3.6089167745585	2.54606880100466e-08
Cc08_g08830	GSCOC_T00017215001	A0A068V5U5	BURP domain-containing protein 3		AT5G25610	-3.59866087435752	2.11807422144467e-08
Cc01_g19450	GSCOC_T00016056001	A0A068U554	Cyclin-P3-1	GO:0019901;GO:0000079	AT3G63120	-3.59663267357989	8.52883424070373e-14
Cc06_g05880	GSCOC_T00043156001	A0A068V431	Putative Bifunctional monodehydroascorbate reductase and carbonic anhydrase nectarin-3	GO:0009570;GO:0004089;GO:0008270	AT3G52720	-3.59636563860096	1.29206640348353e-06
Cc00_g32030	GSCOC_T00008801001	A0A068VQ62	Chalcone and stilbene synthase family protein	GO:0016747;GO:0009058	AT5G13930	-3.57543399977175	6.86410286537623e-05
Cc04_g05930	GSCOC_T00022367001	A0A068TQK9	Serine carboxypeptidase-like 45	GO:0004185	AT1G28110	-3.57503116032698	0.000351551943168085
Cc11_g12000	GSCOC_T00032372001	A0A068TWV0	Probable inactive purple acid phosphatase 1	GO:0003993;GO:0046872	AT1G13750	-3.56399757904203	8.62615182599365e-08
Cc03_g09580	GSCOC_T00030941001	A0A068URP4	Putative Probably inactive leucine-rich repeat receptor-like protein kinase At5g48380	GO:0016021;GO:0005524;GO:0004672	AT4G32710	-3.56257012125119	5.89364620775023e-06
Cc02_g27240	GSCOC_T00025049001	A0A068UHP5	Beta-glucosidase 10	GO:0004553;GO:0005975	AT5G44640	-3.55914261733178	0.00583367506441159
Cc02_g09340	GSCOC_T00029665001	A0A068TX53	Putative Cytosolic sulfotransferase 5	GO:0008146	AT3G45070	-3.55893168263532	2.78411907769276e-17
Cc02_g10380	GSCOC_T00029535001	A0A068TV39	Putative Bark storage protein A	GO:0003824;GO:0009116		-3.55398399369646	2.90470653379265e-05
Cc08_g13370	GSCOC_T00030352001	A0A068UNJ0	Predicted protein (Fragment)			-3.54880110621345	0.000163191897515326
Cc00_g15940	GSCOC_T00007990001	A0A068VKH1	Putative Disease resistance protein RPM1	GO:0043531		-3.54842214242453	5.77332254149879e-06
Cc02_g10370	GSCOC_T00029536001	A0A068TU74	Putative Bark storage protein A	GO:0003824;GO:0009116		-3.54278773392929	9.27824533079004e-07
Cc02_g05400	GSCOC_T00039048001	A0A068V065	RING-H2 finger protein ATL72	GO:0016021	AT3G10910	-3.52280114121661	7.49045857936682e-13
Cc05_g12720	GSCOC_T00021155001	A0A068UC45	Chlorophyll a-b binding protein 13, chloroplastic	GO:0016021;GO:0009522;GO:0009523;GO:0009517;GO:0016168;GO:0019904;GO:0009769;GO:0018298;GO:0010119;GO:0009737;GO:0009635;GO:0009644	AT5G54270	-3.52063080826573	8.73418890492392e-08
Cc05_g07500	GSCOC_T00042280001	A0A068V4M3	Putative uncharacterized protein	GO:0042025;GO:0005634;GO:0003677;GO:0046872	AT1G53160	-3.51736101608879	6.5494500998687e-08
Cc02_g18100	GSCOC_T00014345001	A0A068TLK0	Long chain acyl-CoA synthetase 2	GO:0003824	AT1G49430	-3.51657497399289	1.8784026608802e-09
Cc04_g03790	GSCOC_T00022085001	A0A068TRW7	Putative Root phototropism protein 3		AT1G03010	-3.51139135208948	6.44541619060507e-05
Cc03_g14540	GSCOC_T00026671001	A0A068UI91	Predicted protein			-3.50854983005832	7.94593175055309e-13
Cc08_g14420	GSCOC_T00030224001	A0A068UNA2	Putative Myosin heavy chain-related protein			-3.50731881625466	0.00504341929982173
Cc03_g04210	GSCOC_T00026131001	A0A068TSU1	Plant protein of unknown function (DUF828) with plant pleckstrin homology-like region		AT3G63300	-3.50481162590786	2.66798199453886e-11
Cc00_g18440	GSCOC_T00011147001	A0A068VIA2	G-type lectin S-receptor-like serine/threonine-protein kinase At4g03230	GO:0016021;GO:0005524;GO:0004674;GO:0048544	AT4G21390	-3.50409084218722	3.14580971718984e-07
Cc07_g06020	GSCOC_T00039894001	A0A068U2E5	Putative Remorin family protein	GO:0005886		-3.49788273840331	1.18711873599926e-07
Cc08_g08860	GSCOC_T00017220001	A0A068V891	Putative Dehydration-responsive protein RD22		AT5G25610	-3.48588676338693	8.56236113918488e-20
Cc02_g35270	GSCOC_T00042873001	A0A068V394	Protein of unknown function, DUF538			-3.4850017387335	1.21277209869114e-15
Cc08_g03150	GSCOC_T00037829001	A0A068UXS7	Alpha,alpha-trehalose-phosphate synthase [UDP-forming] 5	GO:0003824;GO:0005992	AT4G17770	-3.4709497121216	5.60145654341517e-08
Cc05_g08160	GSCOC_T00016828001	A0A068V552	Predicted protein	GO:0008168		-3.46682808662866	0.000212410370510528
Cc04_g12750	GSCOC_T00008263001	A0A068VB86	Hypothetical protein	GO:0008171		-3.45822803392263	1.85801002205218e-08
Cc02_g05700	GSCOC_T00039085001	A0A068V093	BEST Arabidopsis thaliana protein match is	GO:0046983		-3.45414316971873	1.24429416038956e-07
Cc08_g05740	GSCOC_T00024363001	A0A068UF89	Chitinase-like protein 2	GO:0004568;GO:0016998;GO:0006032	AT1G05850	-3.43050973722265	7.34064806771768e-12
Cc00_g16360	GSCOC_T00012375001	A0A068VHE3	Metal transporter Nramp1	GO:0016021;GO:0046873	AT1G15960	-3.42261319652713	4.62249410420908e-21
Cc08_g10680	GSCOC_T00027041001	A0A068UJ19	Putative Fatty acid desaturase 1	GO:0016021;GO:0016491;GO:0006629	AT2G46210	-3.42091389276941	4.85609595351754e-12
Cc11_g00210	GSCOC_T00019446001	A0A068VB23	BTB/POZ domain-containing protein At3g19850		AT3G19850	-3.41914937359278	0.00823984208995595
Cc01_g07620	GSCOC_T00009374001	A0A068VEG8	Hypothetical protein	GO:0016021	AT2G13820	-3.41786302900535	0.00033553593568465
Cc07_g08550	GSCOC_T00040232001	A0A068U2I6	Probable non-specific lipid-transfer protein AKCS9	GO:0006869		-3.4123926205216	0.00225372097950192
Cc08_g08370	GSCOC_T00007228001	A0A068VCV7	Caffeic acid 3-O-methyltransferase	GO:0008171;GO:0046983;GO:0032259	AT5G54160	-3.40484612725449	2.73248619367088e-21
Cc02_g05990	GSCOC_T00039121001	A0A068V239	Abscisic acid receptor PYL6			-3.39939593433495	0.000155621608791852
Cc07_g14180	GSCOC_T00036648001	A0A068TZ62	Putative Reticuline oxidase-like protein	GO:0071949;GO:0016491	AT4G20860	-3.38673256189399	1.86831707284329e-06
Cc03_g13110	GSCOC_T00030601001	A0A068UNL3	Tetrapyrrole-binding protein, chloroplastic		AT3G59400	-3.38588728346403	3.31844860818302e-09
Cc02_g27840	GSCOC_T00025134001	A0A068UHT5	E3 ubiquitin ligase BIG BROTHER	GO:0031624;GO:0004842;GO:0048437;GO:0008285;GO:0046621;GO:1900057;GO:0051865		-3.38118111161642	0.00741228320718802
Cc05_g00810	GSCOC_T00013173001	A0A068VAT9	Acidic endochitinase SE2	GO:0004553;GO:0005975	AT5G24090	-3.37946609607106	6.95594052601855e-07
Cc02_g35750	GSCOC_T00042800001	A0A068V3T2	Probable receptor-like protein kinase At2g42960	GO:0016021;GO:0005524;GO:0004672	AT5G18500	-3.37649637324626	2.53549546003364e-05
Cc04_g04550	GSCOC_T00022184001	A0A068TQJ4	alpha/beta-Hydrolases superfamily protein	GO:0003824		-3.37472851358127	5.22729095843886e-12
Cc02_g39980	GSCOC_T00027634001	A0A068UJH7	Thylakoid membrane phosphoprotein 14 kDa, chloroplastic	GO:0016021;GO:0009579	AT2G46820	-3.37131831610278	1.28704106853348e-14
Cc09_g10530	GSCOC_T00041034001	A0A068V146	Expansin-like A1	GO:0005576		-3.36906845481443	0.00861230503605955
Cc03_g04670	GSCOC_T00026194001	A0A068TUY9	Auxin-responsive protein IAA7	GO:0005634;GO:0009734;GO:0006355	AT3G23050	-3.36883195755839	9.38016673064986e-07
Cc02_g04640	GSCOC_T00020381001	A0A068U9Z4	Acid phosphatase 1	GO:0003993		-3.36222583544512	0.000805048911575692
Cc04_g07700	GSCOC_T00022604001	A0A068TRB1	Protein of unknown function, DUF617	GO:0010274	AT2G41660	-3.35593092359401	2.82763079714577e-05
Cc08_g03110	GSCOC_T00037821001	A0A068UWZ1	Putative uncharacterized protein	GO:0005634;GO:0003677	AT1G22640	-3.35334356646725	0.00200758316604541
Cc06_g04320	GSCOC_T00023747001	A0A068UE91	unknown protein; FUNCTIONS IN	GO:0016021		-3.35151886619747	0.000995571130859249
Cc06_g20000	GSCOC_T00022891001	A0A068UDG6	Receptor-like protein kinase FERONIA	GO:0016021;GO:0005524;GO:0004672	AT3G51550	-3.33891752462988	0.00476207081292167
Cc11_g10480	GSCOC_T00032571001	A0A068TWF4	Lysine histidine transporter-like 6	GO:0016021	AT1G25530	-3.33608567154635	1.56734620720624e-05
Cc00_g31160	GSCOC_T00012545001	A0A068VLX3	Putative Hydroxycinnamoyl-Coenzyme A shikimate/quinate hydroxycinnamoyltransferase	GO:0016747	AT2G19070	-3.33560987758033	0.00206228784072568
Cc05_g04810	GSCOC_T00035017001	A0A068UVZ8	Putative Predicted protein			-3.33230453436987	0.00776209821719095
Cc02_g15530	GSCOC_T00014005001	A0A068TLN9	Putative uncharacterized protein	GO:0005634;GO:0003677	AT2G47460	-3.32833365221143	0.00726637522723497
Cc07_g14810	GSCOC_T00036566001	A0A068U1K7	Hypothetical protein			-3.32195553759978	0.00166994921923215
Cc02_g32440	GSCOC_T00001246001	A0A068VBL2	Receptor-like cytosolic serine/threonine-protein kinase RBK2	GO:0005524;GO:0004674	AT3G05140	-3.3200613108248	4.15941643206978e-05
Cc02_g15470	GSCOC_T00013995001	A0A068TNA5	Putative Receptor-like protein 12	GO:0016021	AT4G18760	-3.30902776187045	1.01348670025059e-05
Cc04_g07370	GSCOC_T00022553001	A0A068TQB5	Putative Protein ASPARTIC PROTEASE IN GUARD CELL 1	GO:0004190;GO:0009737;GO:0009414	AT3G18490	-3.30601951814608	8.87970467228976e-08
Cc05_g12860	GSCOC_T00021133001	A0A068UDX9	G-type lectin S-receptor-like serine/threonine-protein kinase At4g27290	GO:0005524;GO:0004674;GO:0048544	AT4G27290	-3.30509411221645	8.30198683419126e-06
Cc07_g05670	GSCOC_T00039845001	A0A068U2A8	L-ascorbate oxidase homolog	GO:0005507;GO:0016491		-3.30144178960219	3.96298347713328e-05
Cc00_g24720	GSCOC_T00004719001	P42884	Monomethylxanthine methyltransferase 1	GO:0008168;GO:0032259		-3.30102022962015	5.21762958275082e-06
Cc07_g16650	GSCOC_T00037536001	A0A068UWE0	Protein of unknown function (DUF3511)			-3.29915471928665	0.00237109678130194
Cc00_g22250	GSCOC_T00007434001	A0A068VJ56	Blue copper protein	GO:0016021;GO:0009055	AT2G32300	-3.2903001898252	0.002930402430555
Cc03_g07320	GSCOC_T00026577001	A0A068TVP2	Chalcone synthase	GO:0016747;GO:0009058	AT5G13930	-3.28680089206484	0.00121938772368758
Cc00_g19010	GSCOC_T00001295001	A0A068VIT0	Chalcone and stilbene synthase family protein	GO:0016747;GO:0009058	AT5G13930	-3.28467677660012	1.10888774902586e-05
Cc08_g02930	GSCOC_T00037794001	A0A068UXL1	Putative E3 ubiquitin-protein ligase Os04g0590900	GO:0016021		-3.28216445687826	0.00388513511189822
Cc08_g01090	GSCOC_T00038431001	A0A068UYZ7	LRR receptor-like serine/threonine-protein kinase ERECTA	GO:0016021;GO:0005524;GO:0004674	AT2G26330	-3.2818148017261	0.00019568265781085
Cc00_g17490	GSCOC_T00008151001	A0A068VHZ0	Protein ASPARTIC PROTEASE IN GUARD CELL 1	GO:0004190	AT3G18490	-3.27069096731261	4.0818271927927e-06
Cc08_g08460	GSCOC_T00009039001	A0A068VC95	Dehydration-responsive protein RD22		AT5G25610	-3.26486067426406	1.20371631615194e-14
Cc01_g12020	GSCOC_T00028122001	A0A068UK96	Chitinase 2	GO:0004553;GO:0005975		-3.26399531824134	0.00871878228668263
Cc01_g16160	GSCOC_T00016474001	A0A068U5X5	Putative unknown protein; BEST Arabidopsis thaliana protein match is	GO:0080167		-3.24964083831383	3.98255449745822e-05
Cc01_g07320	GSCOC_T00030165001	A0A068UMS1	F-box/kelch-repeat protein At5g26960			-3.24630414556475	0.0011686696945502
Cc00_g22520	GSCOC_T00000523001	A0A068VJX9	Probable indole-3-acetic acid-amido synthetase GH3.1		AT2G14960	-3.24532576559363	0.000914095529742807
Cc02_g11230	GSCOC_T00029438001	A0A068TUX7	Phenylalanine ammonia-lyase	GO:0016841	AT3G53260	-3.24098533809287	3.32145025119367e-05
Cc10_g16210	GSCOC_T00033837001	A0A068UT97	Chlorophyll a-b binding protein CP26, chloroplastic	GO:0009535;GO:0016021;GO:0009522;GO:0009523;GO:0016168;GO:0009765;GO:0018298	AT4G10340	-3.23891368273549	1.13167938573859e-11
Cc08_g11060	GSCOC_T00027097001	A0A068UIE4	Putative Probable WRKY transcription factor 50	GO:0005634;GO:0003700;GO:0043565	AT5G26170	-3.23874811917987	1.95140879458383e-05
Cc08_g09090	GSCOC_T00017251001	A0A068V692	Putative Tetraspanin family protein	GO:0016021		-3.23563868660938	0.00543581732615731
Cc04_g07380	GSCOC_T00022554001	A0A068TQZ0	Putative Protein ASPARTIC PROTEASE IN GUARD CELL 1	GO:0004190;GO:0009737;GO:0009414	AT3G18490	-3.2329339574852	0.00013047941677712
Cc05_g00330	GSCOC_T00017061001	A0A068V661	Putative Patatin group A-3	GO:0016787;GO:0016042	AT2G26560	-3.22561280468085	1.40792777586447e-06
Cc01_g16640	GSCOC_T00016416001	A0A068U6G9	Putative uncharacterized protein	GO:0007165		-3.22466555805988	0.00775804155695614
Cc01_g08550	GSCOC_T00023883001	A0A068UE74	Serine/threonine-protein kinase Nek5	GO:0005524;GO:0004672		-3.21696062822196	1.45168095387631e-06
Cc01_g07830	GSCOC_T00015458001	A0A068V4W9	Putative Protein FAF-like, chloroplastic	GO:0005783;GO:0005634;GO:0019902;GO:0047485;GO:0009788;GO:0042326;GO:0010922	AT5G22090	-3.2133541869885	2.07166616812044e-05
Cc02_g29540	GSCOC_T00018391001	A0A068V953	Hypothetical protein			-3.20545548356059	0.00510623395132337
Cc11_g04630	GSCOC_T00004822001	A0A068V8K8	unknown protein; INVOLVED IN			-3.20199319557058	0.00978413041717978
Cc11_g11660	GSCOC_T00032417001	A0A068TYN6	Putative uncharacterized protein	GO:0016021		-3.18409043119338	3.43718680408421e-06
Cc02_g05320	GSCOC_T00039037001	A0A068UZP6	Putative Glycerol-3-phosphate dehydrogenase [NAD(P) ]	GO:0009941;GO:0009331;GO:0004367;GO:0051287;GO:0005975;GO:0046168;GO:0045017;GO:0009627		-3.18225897692998	0.000305263953090569
Cc09_g01490	GSCOC_T00017801001	A0A068U890	Aminomethyltransferase, mitochondrial	GO:0005739;GO:0004047;GO:0008483;GO:0006546	AT1G11860	-3.16159876809819	7.44880112439802e-22
Cc00_g06380	GSCOC_T00004113001	A0A068VE40	Vetispiradiene synthase 1	GO:0000287;GO:0010333		-3.16126541303794	3.88594109164251e-06
Cc02_g18220	GSCOC_T00014359001	A0A068TP31	cytochrome b6f complex subunit (petM), putative	GO:0009535;GO:0009512;GO:0016021;GO:0019904		-3.15840217288056	9.45715197019518e-05
Cc11_g15800	GSCOC_T00038100001	A0A068UYD1	BTB/POZ domain-containing protein At1g67900		AT1G67900	-3.15114691562348	1.9889368487672e-05
Cc05_g11640	GSCOC_T00021288001	A0A068UBM2	UDP-glycosyltransferase 79B6	GO:0008194		-3.14841116273662	0.000582686532765813
Cc07_g14150	GSCOC_T00036651001	A0A068U051	MADS-box protein SVP	GO:0005634;GO:0003700;GO:0046983;GO:0000977;GO:0045944	AT2G22540	-3.14317761843227	1.24794119368708e-06
Cc11_g11390	GSCOC_T00032450001	A0A068TW11	Putative U-box domain-containing protein 43	GO:0004842		-3.14298303818938	0.000339344189334709
Cc08_g16170	GSCOC_T00035569001	A0A068UV54	GDSL esterase/lipase At4g10955	GO:0006629	AT4G10955	-3.13873678807263	2.08633372404233e-05
Cc11_g06180	GSCOC_T00020617001	A0A068UAD1	Putative Ankyrin repeat family protein	GO:0016021		-3.13753930904376	6.90888216847622e-09
Cc01_g05390	GSCOC_T00027326001	A0A068UIX9	Putative Phospholipase C 2	GO:0009507;GO:0004629;GO:0048229;GO:0009395;GO:0048364	AT2G26870	-3.1308769155513	8.52883424070373e-14
Cc01_g13590	GSCOC_T00028331001	A0A068ULF6	Putative Protein of unknown function (DUF3527)			-3.12867306251349	6.72978013332454e-06
Cc02_g01500	GSCOC_T00019974001	A0A068U972	Putative IQ-domain 21	GO:0016021		-3.12813003455115	0.000277003147492577
Cc05_g13520	GSCOC_T00021052001	A0A068UBY6	Microtubule-associated protein TORTIFOLIA1	GO:0005874;GO:0008017	AT4G27060	-3.1252827600103	0.00326125975734767
Cc01_g14140	GSCOC_T00028405001	A0A068ULQ3	Ammonium transporter 1 member 3	GO:0016021;GO:0008519	AT4G13510	-3.12458106243805	7.33522508160053e-05
Cc04_g05100	GSCOC_T00022255001	A0A068TQP1	NDH-dependent cyclic electron flow 1		AT1G15980	-3.12188366809369	3.20048041532522e-11
Cc10_g02730	GSCOC_T00024780001	A0A068UIQ1	RAD-like 1	GO:0005634;GO:0003677	AT1G75250	-3.12154337036215	0.00282100953131191
Cc05_g12660	GSCOC_T00021161001	A0A068UDZ6	Putative Protein of unknown function (DUF761)			-3.11739866229259	2.22930007719931e-06
Cc07_g04120	GSCOC_T00039663001	A0A068U1X7	Predicted protein	GO:0046983	AT3G58850	-3.11450144265084	0.00414713943131228
Cc00_g35820	GSCOC_T00013517001	A0A068VNT7	CMV 1a interacting protein 1			-3.1108225893036	0.00926010344458951
Cc01_g10880	GSCOC_T00024202001	A0A068UHH0	Phenylalanine ammonia-lyase	GO:0016841	AT2G37040	-3.10802264179954	0.000157237881241393
Cc02_g32560	GSCOC_T00001228001	A0A068VAU5	Putative uncharacterized protein			-3.10641097060027	0.000107621098969066
Cc07_g03170	GSCOC_T00039535001	A0A068U1R0	Putative Aldose 1-epimerase	GO:0004034;GO:0030246;GO:0019318		-3.10497853591923	5.29135183991709e-08
Cc11_g09700	GSCOC_T00032686001	A0A068TXN5	Non-specific lipid-transfer protein 2	GO:0006869		-3.10372404167076	1.1042027055156e-08
Cc02_g36010	GSCOC_T00042761001	A0A068V3E5	Pectinacetylesterase family protein	GO:0005618;GO:0005576;GO:0016787;GO:0071555		-3.10132353593444	4.78435444920688e-08
Cc03_g12920	GSCOC_T00030637001	A0A068UND9	Serine/threonine-protein kinase-like protein ACR4	GO:0009986;GO:0030139;GO:0016021;GO:0005886;GO:0005524;GO:0042803;GO:0004672;GO:0009793;GO:0048439;GO:0010311;GO:0090627;GO:0046777;GO:0009786;GO:0048829	AT3G59420	-3.09667902786473	2.33757958618017e-05
Cc06_g20650	GSCOC_T00023014001	A0A068UDK8	Putative Polynucleotidyl transferase, ribonuclease H-like superfamily protein	GO:0008408;GO:0003676		-3.09352379070258	0.000869712765738078
Cc01_g10180	GSCOC_T00024100001	A0A068UH96	Hypothetical protein	GO:0016021		-3.09056961991643	0.00024660873904687
Cc07_g14700	GSCOC_T00036578001	A0A068TZZ3	Serine/threonine-protein kinase SAPK2	GO:0005524;GO:0004674	AT4G33950	-3.08665456677981	2.66603865421073e-06
Cc09_g04660	GSCOC_T00017398001	A0A068U729	Putative DNA-3-methyladenine glycosylase 1	GO:0008725;GO:0006284		-3.08474253276901	0.00283330854430069
Cc04_g03610	GSCOC_T00022056001	A0A068TP25	Auxin-induced protein 22A	GO:0005634;GO:0009734;GO:0006355	AT3G15540	-3.08058663212189	0.00166753369094064
Cc10_g04830	GSCOC_T00034888001	A0A068U109	Putative uncharacterized protein			-3.07888469334614	0.000371142721827697
Cc02_g38920	GSCOC_T00027790001	A0A068UKC6	Putative glucose-6-phosphate 1-epimerase	GO:0030246;GO:0047938;GO:0005975		-3.07871322341785	0.00144361105720708
Cc10_g06960	GSCOC_T00034591001	A0A068TXP2	UDP-glycosyltransferase 85A1	GO:0008194	AT1G22400	-3.07798288453688	1.93127266654685e-06
Cc05_g04840	GSCOC_T00035020001	A0A068UTP9	Putative Septum-promoting GTP-binding protein 1	GO:0090404;GO:0005525;GO:0003924		-3.07779631746166	4.36547783087246e-07
Cc11_g09770	GSCOC_T00032673001	A0A068TXA2	Probable protein phosphatase 2C 15	GO:0004722		-3.07368435705694	3.67073071756576e-07
Cc00_g30720	GSCOC_T00002466001	A0A068VM24	Hypothetical protein			-3.06830199440057	2.0990080457885e-06
Cc05_g00040	GSCOC_T00017017001	A0A068V7Y5	unknown protein; FUNCTIONS IN	GO:0016021		-3.06357775451603	1.01348670025059e-05
Cc03_g07240	GSCOC_T00026568001	A0A068TSY0	Purple acid phosphatase 23	GO:0003993;GO:0046872	AT3G07130	-3.05975988014669	0.00012962580903924
Cc01_g04960	GSCOC_T00028573001	A0A068UNU8	ABC transporter G family member 15	GO:0016021;GO:0005524;GO:0016887	AT3G21090	-3.0586818815742	2.16469343182142e-20
Cc00_g13610	GSCOC_T00011114001	A0A068VH35	Anthocyanidin reductase	GO:0003824	AT1G61720	-3.05660453615803	0.00701218095315907
Cc11_g17070	GSCOC_T00038263001	A0A068UY59	Protein of unknown function (DUF 3339)	GO:0016021		-3.05381524649843	6.12897764999509e-09
Cc02_g32680	GSCOC_T00001208001	A0A068VE39	GDSL esterase/lipase At1g54790	GO:0016788		-3.05102399922671	0.000234865412460982
Cc11_g16830	GSCOC_T00038230001	A0A068UYF4	65-kDa microtubule-associated protein 8	GO:0005874;GO:0009524;GO:0005819;GO:0008017;GO:0000226		-3.04690228837048	1.97864684114977e-06
Cc09_g10110	GSCOC_T00041090001	A0A068V1X2	Putative Subtilisin-like protease	GO:0004252	AT5G45650	-3.04309980539757	9.12371675091296e-05
Cc01_g03960	GSCOC_T00040880001	A0A068V191	Putative G-type lectin S-receptor-like serine/threonine-protein kinase RLK1			-3.03790273007242	8.64072666479166e-05
Cc10_g12590	GSCOC_T00031977001	A0A068UQZ6	Photosystem I reaction center subunit N, chloroplastic	GO:0009522;GO:0015979		-3.03544315556951	1.04328642516399e-10
Cc02_g31040	GSCOC_T00023875001	A0A068UF73	Putative Lysosomal beta glucosidase	GO:0016021;GO:0004553;GO:0005975		-3.03298429780242	7.07924222907903e-06
Cc07_g02470	GSCOC_T00039442001	A0A068U1H3	Putative Auxin-induced protein 5NG4	GO:0016021;GO:0022857	AT3G28050	-3.0325151045261	7.54195155817641e-07
Cc09_g08980	GSCOC_T00023128001	A0A068UFD3	Putative ferredoxin-related			-3.0283502875745	0.00161683204867628
Cc02_g33050	GSCOC_T00016746001	A0A068V5Q6	Putative GDSL esterase/lipase 5	GO:0016788	AT1G53920	-3.02609641247206	1.0127212505858e-12
Cc02_g08120	GSCOC_T00029843001	A0A068TUT5	ACT domain-containing protein		AT2G39570	-3.02464711291121	7.60736155625695e-12
Cc05_g01140	GSCOC_T00000918001	A0A068V9U5	Hypothetical protein			-3.02016273652025	0.00623721106453731
Cc09_g10600	GSCOC_T00041025001	A0A068V3Q0	Hypothetical protein		AT4G35250	-3.01265555787689	6.6737578125096e-08
Cc00_g11810	GSCOC_T00007743001	A0A068VGL7	Putative Protein of unknown function (DUF594)	GO:0016021		-3.00941479288515	0.00072824789902985
Cc05_g02850	GSCOC_T00020872001	A0A068UDK5	Putative Glucan endo-1,3-beta-glucosidase 3	GO:0004553;GO:0005975	AT2G01630	-3.00750611959015	5.71413029219196e-06
Cc06_g14090	GSCOC_T00041302001	A0A068U3Z2	Putative Auxin-induced protein 5NG4	GO:0016021;GO:0022857	AT4G30420	-3.00692464421647	1.9288837564393e-08
Cc06_g17100	GSCOC_T00012653001	A0A068VF99	Putative Magnesium-chelatase subunit H	GO:0016851;GO:0015995	AT5G13630	-3.00260820663291	3.57303861910422e-17
Cc01_g11650	GSCOC_T00028070001	A0A068UMT3	Putative Interactor of constitutive active ROPs 3		AT5G60210	-2.9929615595421	6.58123137341839e-08
Cc08_g13270	GSCOC_T00030363001	A0A068UNJ6	unknown protein; INVOLVED IN		AT5G12900	-2.98431697745578	6.06016202555671e-06
Cc08_g04040	GSCOC_T00034207001	A0A068UTX7	early-responsive to dehydration stress protein (ERD4)	GO:0016021		-2.98230370922998	0.00418721459010238
Cc05_g09520	GSCOC_T00021572001	A0A068UD61	Pentatricopeptide repeat-containing protein At2g42920, chloroplastic		AT2G42920	-2.98208230556603	2.47264622345289e-13
Cc03_g03580	GSCOC_T00026050001	A0A068TSV4	Linoleate 9S-lipoxygenase 5, chloroplastic	GO:0046872;GO:0016702;GO:0031408	AT3G22400	-2.9799470776509	0.000278881713326758
Cc04_g16390	GSCOC_T00035731001	A0A068UVG5	(-)-germacrene D synthase	GO:0000287;GO:0010333		-2.97499889632953	2.12161617339075e-06
Cc02_g14500	GSCOC_T00013861001	A0A068TKP8	Hexose carrier protein HEX6	GO:0016021;GO:0022857	AT1G11260	-2.97483706845782	0.000474881003037897
Cc05_g08120	GSCOC_T00016823001	A0A068V5G9	TRICHOME BIREFRINGENCE-LIKE 39			-2.97327312659532	7.33522508160053e-05
Cc06_g06470	GSCOC_T00031379001	A0A068UQS8	Putative uncharacterized protein	GO:0016021		-2.96736360922046	0.00185129384479293
Cc04_g16340	GSCOC_T00035723001	A0A068UVF9	Expansin-A15	GO:0005618;GO:0005576;GO:0016020;GO:0009664	AT2G03090	-2.96613177040695	0.000118813637251096
Cc11_g03140	GSCOC_T00025462001	A0A068UI82	Putative UDP-glycosyltransferase 76E1	GO:0008194	AT5G59580	-2.96501116729517	0.000442331702273212
Cc04_g05170	GSCOC_T00022262001	A0A068TPU2	Putative receptor-like protein kinase At1g80870	GO:0016021;GO:0005886;GO:0005524;GO:0004674	AT1G80870	-2.96421780300669	0.000463642595159839
Cc08_g09490	GSCOC_T00026890001	A0A068UKM2	Putative Probable glycosyltransferase At5g03795	GO:0016757;GO:0006486		-2.96070083796578	9.52048388274665e-11
Cc06_g22740	GSCOC_T00040675001	A0A068V387	Magnesium-protoporphyrin IX monomethyl ester [oxidative] cyclase, chloroplastic	GO:0048529;GO:0046872;GO:0015995;GO:0015979	AT3G56940	-2.95947263914576	1.3057250062874e-10
Cc04_g08070	GSCOC_T00022655001	A0A068TQI6	Tropinone reductase homolog At1g07440	GO:0016491	AT5G06060	-2.954477006429	0.0012245199481642
Cc00_g17060	GSCOC_T00008777001	A0A068VHV0	Probable xyloglucan endotransglucosylase/hydrolase protein 28	GO:0048046;GO:0005618;GO:0004553;GO:0016762;GO:0042546;GO:0071555;GO:0010411	AT1G14720	-2.95447215069769	4.09474102684158e-07
Cc08_g03920	GSCOC_T00034191001	A0A068UT88	Putative Cytochrome P450 76C4	GO:0020037;GO:0005506;GO:0004497;GO:0016705	AT2G45550	-2.95239457206992	0.00504341929982173
Cc11_g00220	GSCOC_T00019447001	A0A068V8R0	Putative Probable galactinol--sucrose galactosyltransferase 2	GO:0003824	AT3G57520	-2.95106566678891	3.14151951744984e-12
Cc01_g16150	GSCOC_T00016475001	A0A068U623	Putative Bifunctional inhibitor/lipid-transfer protein/seed storage 2S albumin superfamily protein	GO:0005504;GO:0009627	AT5G48485	-2.94370439363779	5.43184863515793e-08
Cc07_g10480	GSCOC_T00037111001	A0A068U084	Lactoylglutathione lyase / glyoxalase I family protein	GO:0004462;GO:0046872		-2.94158368133361	1.35008656816207e-07
Cc07_g03750	GSCOC_T00039620001	A0A068U167	Lamin-like protein	GO:0009055	AT5G15350	-2.93797725926543	0.00571974086749929
Cc05_g09110	GSCOC_T00002670001	A0A068VGE5	Putative Predicted protein	GO:0016021;GO:0035556		-2.93614003097756	1.38788079293494e-05
Cc08_g01020	GSCOC_T00038438001	A0A068UYH9	alpha/beta-Hydrolases superfamily protein			-2.93165076549526	1.74559474927038e-14
Cc03_g02320	GSCOC_T00025874001	A0A068TU85	NAD(P)-binding Rossmann-fold superfamily protein		AT5G18660	-2.93073453266631	2.50298065602977e-07
Cc08_g12840	GSCOC_T00030423001	A0A068UN10	Adenine phosphoribosyltransferase 1, chloroplastic	GO:0005737;GO:0003999;GO:0006168;GO:0009116	AT4G12440	-2.93054339624635	0.00380916664098202
Cc06_g18090	GSCOC_T00040413001	A0A068V0Z1	6-phosphogluconate dehydrogenase family protein	GO:0009331;GO:0004367;GO:0051287;GO:0005975;GO:0046168		-2.9279345585437	0.00675514352227992
Cc08_g15580	GSCOC_T00035495001	A0A068UWU5	Putative uncharacterized protein			-2.9256773831546	0.00477221178159045
Cc05_g10320	GSCOC_T00021462001	A0A068UCV1	Interactor of constitutive active ROPs 4		AT1G78430	-2.91635287777189	0.00151392430283023
Cc07_g10290	GSCOC_T00037136001	A0A068U080	Aldehyde dehydrogenase family 3 member F1	GO:0005783;GO:0016620;GO:0006081	AT4G36250	-2.91588735487863	1.23610663068984e-12
Cc10_g01310	GSCOC_T00024601001	A0A068UFW4	Probable cinnamyl alcohol dehydrogenase 6	GO:0016491;GO:0008270	AT4G39330	-2.91277783924309	1.19700181455959e-05
Cc02_g14400	GSCOC_T00013848001	A0A068TKP3	IQ-domain 9	GO:0005886	AT1G74690	-2.91166380496171	0.00195228850887696
Cc06_g16420	GSCOC_T00030695001	A0A068UNI2	Putative Transcription factor bHLH60	GO:0046983;GO:0006355	AT2G42300	-2.90736794810974	3.07146529638711e-05
Cc06_g08740	GSCOC_T00031091001	A0A068UPZ2	Dynein light chain, cytoplasmic	GO:0030286;GO:0007017		-2.9047456690245	0.00920029445452749
Cc07_g08290	GSCOC_T00040198001	A0A068U3K6	unknown protein; FUNCTIONS IN			-2.90296838985983	3.00684938467733e-05
Cc00_g14180	GSCOC_T00009212001	A0A068VGY3	Cytochrome P450 85A1	GO:0020037;GO:0005506;GO:0004497;GO:0016705	AT3G30180	-2.90251466042761	3.77911697836376e-06
Cc02_g21280	GSCOC_T00014765001	A0A068TN86	ABC transporter G family member 11	GO:0016021;GO:0005524;GO:0016887	AT1G17840	-2.9016592434239	0.000144203659396768
Cc01_g17320	GSCOC_T00016338001	A0A068U6N2	Putative kinase-like protein TMKL1	GO:0005524;GO:0004672	AT3G24660	-2.90162543102353	0.00182365939007522
Cc03_g01950	GSCOC_T00025828001	A0A068TRK7	ralf-like 33		AT3G16570	-2.89725842172285	1.08855831859666e-17
Cc05_g00800	GSCOC_T00013171001	A0A068VAJ2	Hevamine-A	GO:0004553;GO:0005975	AT5G24090	-2.89702565750592	4.71144475218567e-05
Cc00_g08290	GSCOC_T00004569001	A0A068VEM0	Putative Disease resistance-responsive (dirigent-like protein) family protein	GO:0048046		-2.89494887445638	0.00247498383176649
Cc04_g04400	GSCOC_T00022164001	A0A068TQG4	phosphatidic acid phosphatase-related / PAP2-related	GO:0016021		-2.89483274023582	0.00505808849654319
Cc06_g06040	GSCOC_T00043175001	A0A068V4E0	Putative 1-aminocyclopropane-1-carboxylate oxidase homolog 1	GO:0046872;GO:0016491		-2.89202864418898	0.00105048876645759
Cc04_g13490	GSCOC_T00018274001	A0A068V6K4	G-type lectin S-receptor-like serine/threonine-protein kinase At4g03230	GO:0016021;GO:0005524;GO:0030247;GO:0004674;GO:0048544	AT4G21390	-2.89092142088421	0.000279147915381912
Cc10_g11640	GSCOC_T00001438001	A0A068VAW0	Acyl-CoA N-acyltransferases (NAT) superfamily protein	GO:0008080		-2.89051872001593	0.000133554616618976
Cc10_g02240	GSCOC_T00024723001	A0A068UGW1	Auxin-induced protein 5NG4	GO:0016021;GO:0022857	AT1G75500	-2.88989803708569	1.581910566481e-06
Cc07_g07220	GSCOC_T00040061001	A0A068U2U5	Galactomannan galactosyltransferase 1	GO:0016021;GO:0016757;GO:0016021;GO:0016757	AT4G37690	-2.88890325160643	2.1440953695592e-10
Cc00_g13630	GSCOC_T00009320001	A0A068VH58	Hypothetical protein			-2.8872265833476	0.000426644574415401
Cc10_g01850	GSCOC_T00024674001	A0A068UFS4	ATP sulfurylase 2	GO:0009570;GO:0005829;GO:0004781;GO:0009970;GO:0000103	AT1G19920	-2.87554304251583	2.9612946998982e-09
Cc11_g05890	GSCOC_T00020564001	A0A068UAH3	Probable xyloglucan endotransglucosylase/hydrolase protein 27	GO:0048046;GO:0005618;GO:0004553;GO:0016762;GO:0071555;GO:0006073	AT1G14720	-2.87086742599519	1.3140444169142e-07
Cc05_g03500	GSCOC_T00033572001	A0A068USY3	Putative Protein ASPARTIC PROTEASE IN GUARD CELL 1	GO:0016021;GO:0004190	AT5G10770	-2.86810169286449	5.5835990434925e-07
Cc07_g07090	GSCOC_T00040045001	A0A068U370	Protein SHORT-ROOT	GO:0005634;GO:0003700;GO:0043565;GO:0008356;GO:0048366;GO:0009956	AT4G37650	-2.86764333283234	0.00890830728860111
Cc02_g16930	GSCOC_T00014195001	A0A068TM21	Hypothetical protein			-2.86325276174189	0.00381608418351679
Cc01_g09790	GSCOC_T00024046001	A0A068UFK2	Putative phytosulfokines 6	GO:0005576;GO:0008083;GO:0008283	AT3G44735	-2.85626474674533	1.67940588310715e-06
Cc03_g14460	GSCOC_T00026663001	A0A068UIF2	Putative Rhodanese/Cell cycle control phosphatase superfamily protein			-2.85005757765877	3.8316832314538e-17
Cc10_g02690	GSCOC_T00024776001	A0A068UH09	Tubby-like F-box protein 5	GO:0009555		-2.84770384040674	0.000954545527008567
Cc10_g16360	GSCOC_T00011268001	A0A068VKC8	Hypothetical protein			-2.84310819472933	0.0047012888863426
Cc04_g00830	GSCOC_T00021708001	A0A068TP49	Subtilisin-like protease	GO:0004252	AT3G14240	-2.84270151493677	1.02971044542041e-05
Cc10_g01700	GSCOC_T00024656001	A0A068UFR1	Putative uncharacterized protein			-2.84121799719269	4.37879228255281e-06
Cc04_g13610	GSCOC_T00003550001	A0A068VCQ4	ABC transporter G family member 11	GO:0009897;GO:0016021;GO:0005524;GO:0016887;GO:0015562;GO:0015245;GO:0042803;GO:0010588;GO:0042335;GO:0080051;GO:0009737;GO:0009651;GO:0009611;GO:0010222;GO:0010345	AT1G17840	-2.8376032221588	4.75221695803974e-10
Cc00_g10320	GSCOC_T00008233001	A0A068VG06	Putative Protein ASPARTIC PROTEASE IN GUARD CELL 1	GO:0016021;GO:0004190		-2.83561913746344	6.67077117376116e-06
Cc10_g03330	GSCOC_T00024857001	A0A068UIV8	Putative uncharacterized protein	GO:0005634;GO:0003677;GO:0006355		-2.83546962618278	1.17017087545531e-06
Cc00_g01360	GSCOC_T00010937001	A0A068V9R6	Probable indole-3-acetic acid-amido synthetase GH3.1		AT2G14960	-2.83267936488367	0.00221703685540886
Cc01_g08780	GSCOC_T00023914001	A0A068UGV8	photosystem I subunit O	GO:0009507;GO:0016021;GO:0009522;GO:0009767	AT1G08380	-2.83168884933608	8.83753377652359e-09
Cc03_g04140	GSCOC_T00026123001	A0A068TS17	Putative Kinase interacting (KIP1-like) family protein	GO:0003779	AT3G22790	-2.82855705373819	2.31455406713906e-05
Cc11_g15340	GSCOC_T00038044001	A0A068V024	Putative Plant protein 1589 of unknown function			-2.82734383447959	9.54022188505085e-11
Cc02_g21030	GSCOC_T00014735001	A0A068TN63	Root phototropism protein 3		AT5G64330	-2.82573034880658	2.38731541102423e-05
Cc02_g17970	GSCOC_T00014329001	A0A068TP04	Protein TIC 62, chloroplastic	GO:0098807	AT3G18890	-2.82076619056228	1.41959609616392e-14
Cc09_g10620	GSCOC_T00041022001	A0A068V1H5	Putative LysM domain-containing GPI-anchored protein 2		AT2G17120	-2.8166517156834	2.61384918270707e-06
Cc04_g16160	GSCOC_T00042408001	A0A068V331	Putative Microtubule-associated protein TORTIFOLIA1	GO:0005874;GO:0008017	AT5G62580	-2.81612217611651	0.000648490642602342
Cc08_g02080	GSCOC_T00037669001	A0A068UXC5	Probable methyltransferase PMT14	GO:0016021;GO:0008168;GO:0032259		-2.81181432723203	0.00015189517142175
Cc10_g06830	GSCOC_T00034606001	A0A068U0F8	F-box protein FBW2	GO:0010629;GO:0010608;GO:0016567;GO:0009737;GO:0006511	AT4G08980	-2.80645344999054	0.00337164715754213
Cc04_g16410	GSCOC_T00035736001	A0A068UVK8	Chlorophyll a-b binding protein 4, chloroplastic	GO:0009535;GO:0016021;GO:0009522;GO:0009523;GO:0016168;GO:0009765;GO:0018298	AT3G47470	-2.80573618136338	0.0014195610068082
Cc09_g09020	GSCOC_T00023117001	A0A068UDQ4	Chlorophyll a-b binding protein 21, chloroplastic	GO:0009535;GO:0016021;GO:0009522;GO:0009523;GO:0016168;GO:0009765;GO:0018298	AT1G29930	-2.79943827386874	0.000478013035108818
Cc00_g12090	GSCOC_T00005877001	A0A068VGB8	Putative Fatty acid amide hydrolase	GO:0016787		-2.79901603357224	0.00145769560304127
Cc06_g01860	GSCOC_T00023422001	A0A068UD94	Fructose-1,6-bisphosphatase, chloroplastic	GO:0042132;GO:0005975	AT3G54050	-2.79311826187036	9.84692365721948e-13
Cc01_g06530	GSCOC_T00030041001	A0A068UMY0	Early nodulin-like protein	GO:0016021;GO:0009055	AT5G15350	-2.79217788832851	6.78384242969158e-12
Cc10_g12560	GSCOC_T00031972001	A0A068URN5	Probable peptide/nitrate transporter At5g62680	GO:0016021;GO:0022857	AT5G62680	-2.78903078007229	0.000519093042527982
Cc01_g09780	GSCOC_T00024045001	A0A068UH55	Arogenate dehydratase/prephenate dehydratase 6, chloroplastic	GO:0009570;GO:0047769;GO:0004664;GO:0009094	AT1G08250	-2.78777195902031	8.28054443017935e-05
Cc02_g07000	GSCOC_T00039256001	A0A068V0N1	Putative Pollen-specific protein SF3	GO:0046872		-2.7865921736233	0.00134869762481748
Cc07_g09850	GSCOC_T00037190001	A0A068U1D8	Mannan endo-1,4-beta-mannosidase 7	GO:0004553;GO:0005975	AT5G66460	-2.778005598892	0.000151613990357262
Cc02_g26470	GSCOC_T00024943001	A0A068UH94	alpha/beta-Hydrolases superfamily protein			-2.77475381951671	8.22551214849401e-11
Cc04_g02760	GSCOC_T00021957001	A0A068TNT2	Ethylene-responsive transcription factor TINY	GO:0005634;GO:0003677;GO:0003700		-2.77336094575882	0.00850437410872948
Cc00_g30080	GSCOC_T00013320001	A0A068VLY1	Protein COBRA	GO:0031225;GO:0016021;GO:0010215	AT5G60920	-2.76984107942279	1.41520205708154e-08
Cc07_g09810	GSCOC_T00037195001	A0A068U304	Dihydroflavonol-4-reductase	GO:0003824	AT5G42800	-2.76189616974757	0.0045072019160766
Cc02_g39080	GSCOC_T00027767001	A0A068UJU8	TRICHOME BIREFRINGENCE-LIKE 25	GO:0016021	AT1G01430	-2.76070122658732	1.97959869379177e-10
Cc02_g21720	GSCOC_T00014817001	A0A068TQ25	Chlorophyll a-b binding protein CP24 10A, chloroplastic	GO:0009535;GO:0016021;GO:0009522;GO:0009523;GO:0016168;GO:0009765;GO:0018298	AT1G45474	-2.75870820072565	2.38516609912901e-05
Cc00_g02070	GSCOC_T00001840001	A0A068V9W4	Hypothetical protein			-2.75503977158798	0.000951084740440156
Cc02_g04610	GSCOC_T00020378001	A0A068UAQ5	Derlin-1.2	GO:0005789;GO:0016021	AT4G29330	-2.75452466466841	0.00938144390797609
Cc09_g03850	GSCOC_T00017496001	A0A068U9D0	Putative Cytosolic sulfotransferase 17	GO:0008146		-2.75033377972989	8.87983775333717e-09
Cc02_g19160	GSCOC_T00014480001	A0A068TML4	Putative Polygalacturonase inhibitor 1		AT2G23950	-2.7485227994976	1.40297672952847e-10
Cc09_g06970	GSCOC_T00036338001	Q9AVK0	7-methylxanthosine synthase 1	GO:0046872;GO:0008168;GO:0009820;GO:0032259	AT3G11480	-2.74765075063711	0.00149687199558948
Cc10_g03410	GSCOC_T00024865001	A0A068UGF6	Probable galacturonosyltransferase-like 1	GO:0005783;GO:0016757;GO:0052386;GO:0010417;GO:0048366;GO:0032504;GO:0010051		-2.74536774877553	0.00702351272674754
Cc02_g33120	GSCOC_T00015326001	A0A068V4M6	Putative uncharacterized protein	GO:0046872;GO:0030001	AT5G27690	-2.74415548706853	0.0018673865070323
Cc02_g09360	GSCOC_T00029663001	A0A068TUK6	Putative bZIP protein		AT3G58120	-2.74037439570094	0.000570282463711575
Cc10_g08170	GSCOC_T00034428001	A0A068TYF3	Glutamyl-tRNA reductase 1, chloroplastic	GO:0008883;GO:0050661;GO:0006782	AT1G58290	-2.73949043992267	6.41217650917045e-06
Cc09_g10590	GSCOC_T00041026001	A0A068V1X9	Putative Uncharacterized protein ycf39	GO:0016021	AT4G35250	-2.73679243215673	6.86168258687033e-09
Cc02_g12010	GSCOC_T00029343001	A0A068TTY9	Putative G-type lectin S-receptor-like serine/threonine-protein kinase SD1-1	GO:0016021;GO:0005524;GO:0004672;GO:0048544		-2.73098899521377	0.00305059817032441
Cc01_g02440	GSCOC_T00009708001	A0A068V9C9	Serine carboxypeptidase-like 18	GO:0004185	AT3G10450	-2.73064175399143	0.000298914326587152
Cc08_g06890	GSCOC_T00025236001	A0A068UGY9	Putative Cytosolic sulfotransferase 15	GO:0008146	AT5G07010	-2.72744544179296	0.00044158712768563
Cc07_g14120	GSCOC_T00036654001	A0A068TZS4	Putative DUF246 domain-containing protein At1g04910	GO:0016757;GO:0006004	AT5G65470	-2.72739715581496	2.99399921184957e-09
Cc02_g19400	GSCOC_T00014506001	A0A068TM17	Alpha-L-fucosidase 2	GO:0004560	AT4G34260	-2.7269544947082	3.99864840241016e-09
Cc06_g15730	GSCOC_T00030781001	A0A068UPJ1	Plant protein of unknown function (DUF828)	GO:0016021	AT5G06700	-2.72486147023215	1.40200423817128e-19
Cc07_g05320	GSCOC_T00039802001	A0A068U272	Protein of unknown function, DUF547			-2.72407637880401	0.00788181541394675
Cc07_g12340	GSCOC_T00036887001	A0A068TZP3	Putative Cucumisin	GO:0004252	AT4G10520	-2.72169647007851	0.000413709747125548
Cc07_g03710	GSCOC_T00039616001	A0A068U194	Protein of unknown function (DUF1336)			-2.71666170924504	0.000181143001165119
Cc02_g38120	GSCOC_T00027905001	A0A068UKH9	Aquaporin PIP1-3	GO:0016021;GO:0015267		-2.71626276332591	9.28099881852688e-08
Cc07_g17480	GSCOC_T00037424001	A0A068UWW8	Putative G-type lectin S-receptor-like serine/threonine-protein kinase RLK1	GO:0016021;GO:0005524;GO:0004674;GO:0048544		-2.71498984379997	0.000183990141939059
Cc07_g14130	GSCOC_T00036653001	A0A068TZ66	3-hydroxyacyl-CoA dehydratase PASTICCINO 2	GO:0005789;GO:0016021;GO:0102343;GO:0102344;GO:0102345;GO:0102158;GO:0006633		-2.71291436760185	3.47701419548093e-13
Cc11_g14310	GSCOC_T00032073001	A0A068TY06	unknown protein; FUNCTIONS IN			-2.71031942291956	3.30129563156285e-08
Cc04_g05760	GSCOC_T00022342001	A0A068TPQ9	Uncharacterized protein At4g14100		AT4G14100	-2.70561601636313	0.00210776517876697
Cc03_g05800	GSCOC_T00026349001	A0A068TSQ9	Long-chain-alcohol oxidase FAO1	GO:0016020;GO:0050660;GO:0046577	AT3G23410	-2.70193588344049	8.10655495234553e-10
Cc02_g07100	GSCOC_T00009472001	A0A068VGA5	Uncharacterized protein	GO:0016021;GO:0008270		-2.70155363795304	0.00486061486026482
Cc08_g10660	GSCOC_T00027038001	A0A068UIB2	Putative FUNCTIONS IN	GO:0016021;GO:0005886	AT5G53730	-2.69852665490067	0.000207728821339397
Cc08_g14470	GSCOC_T00030219001	A0A068UN97	Putative O-glucosyltransferase rumi homolog			-2.69804801024879	0.000923954021710944
Cc05_g06080	GSCOC_T00009858001	A0A068VHP4	Putative late blight resistance protein homolog R1A-6	GO:0043531		-2.68883344205658	4.049627757938e-05
Cc11_g12940	GSCOC_T00032248001	A0A068TVM9	Intracellular ribonuclease LX	GO:0033897;GO:0003723		-2.68784123469046	0.00148189546810149
Cc06_g15000	GSCOC_T00030893001	A0A068UPM4	Putative DNA-3-methyladenine glycosylase 1	GO:0008725;GO:0006284		-2.68715011226531	0.000153809715846876
Cc06_g04650	GSCOC_T00042980001	A0A068V603	Putative UDP-glycosyltransferase 73C1	GO:0008194	AT2G36750	-2.67520346417795	4.8154930580013e-08
Cc11_g13720	GSCOC_T00032146001	A0A068TW67	HIPL1 protein	GO:0003824		-2.67417071571413	0.00327363512022814
Cc09_g02170	GSCOC_T00017710001	A0A068U776	Aquaporin PIP2-1	GO:0016021;GO:0015267;GO:0016021;GO:0015267	AT3G53420	-2.6621702136496	0.00103114457608686
Cc00_g22690	GSCOC_T00011338001	A0A068VJL8	BURP domain-containing protein 3		AT5G25610	-2.65869054687407	0.000145338485506195
Cc02_g13600	GSCOC_T00029126001	A0A068TTY6	Squamosa promoter-binding protein 1	GO:0042025;GO:0005634;GO:0003677;GO:0003700;GO:0046872;GO:0009908	AT2G33810	-2.65781616203785	0.000333910035981383
Cc02_g22480	GSCOC_T00014919001	A0A068TNL5	maternal effect embryo arrest 9	GO:0005886;GO:0009506;GO:0009793;GO:0009555		-2.6569523033349	1.45478018415313e-07
Cc11_g09790	GSCOC_T00032670001	A0A068TWI3	Putative Protein kinase superfamily protein	GO:0016021;GO:0005524;GO:0004672	AT5G38280	-2.65603723863375	0.00407019783858674
Cc05_g15430	GSCOC_T00038693001	A0A068V1B5	Fructose-bisphosphate aldolase, cytoplasmic isozyme 1	GO:0004332;GO:0006096	AT4G26530	-2.65549256602876	4.93710082686397e-05
Cc06_g23280	GSCOC_T00040594001	A0A068V1C0	Photosystem II 5 kDa protein, chloroplastic		AT3G21055	-2.6546577831279	3.38332548066202e-11
Cc01_g03290	GSCOC_T00033134001	A0A068US19	Nucleotide-diphospho-sugar transferases superfamily protein		AT1G64980	-2.65048842680259	3.45249064472626e-06
Cc08_g11220	GSCOC_T00027119001	A0A068UIM7	peptidyl-prolyl cis-trans isomerases	GO:0003755;GO:0006979		-2.64848603168504	3.32145025119367e-05
Cc08_g07060	GSCOC_T00025300001	A0A068UHT7	Transmembrane 9 superfamily member 4	GO:0016021		-2.64623991312215	0.00165703814583564
Cc05_g12390	GSCOC_T00021196001	A0A068UBF1	Protein of unknown function (DUF1218)	GO:0016021		-2.64550070014622	2.8536889848376e-08
Cc04_g02120	GSCOC_T00021880001	A0A068TNV9	Inorganic pyrophosphatase 2	GO:0046872;GO:0016791		-2.63919866250239	7.76924744138738e-06
Cc09_g00860	GSCOC_T00017891001	A0A068U834	Rho GDP-dissociation inhibitor 1	GO:0005737;GO:0005094	AT3G07880	-2.63668621111715	2.76820586687134e-06
Cc07_g09500	GSCOC_T00037231001	A0A068U1H6	Putative Phosphatidylinositol transfer protein PDR16			-2.62409509815448	0.00565554129639605
Cc01_g03080	GSCOC_T00019039001	A0A068V7S1	Putative Auxin-induced protein 5NG4	GO:0016021;GO:0022857		-2.62306476369185	0.00485858659434827
Cc10_g07320	GSCOC_T00034538001	A0A068TYP3	unknown protein; BEST Arabidopsis thaliana protein match is		AT2G22260	-2.62212283624639	0.000495836913544516
Cc07_g14720	GSCOC_T00036575001	A0A068TZK1	Uncharacterized protein			-2.62114772127607	0.00331114536756794
Cc01_g16760	GSCOC_T00016403001	A0A068U5R8	Oleoyl-acyl carrier protein thioesterase, chloroplastic (Fragment)	GO:0009507;GO:0016790;GO:0006633	AT3G25110	-2.61949163483398	6.06294722332053e-12
Cc01_g09770	GSCOC_T00024043001	A0A068UFA7	Nucleobase-ascorbate transporter 12	GO:0016021;GO:0022857	AT2G27810	-2.61701022293248	0.00165703814583564
Cc04_g16030	GSCOC_T00042393001	A0A068V2M1	Putative Transcription factor bHLH79	GO:0046983;GO:0006355	AT5G62610	-2.61633783124804	7.33522508160053e-05
Cc05_g06670	GSCOC_T00042170001	A0A068V1U9	Putative unknown protein; BEST Arabidopsis thaliana protein match is	GO:0016021		-2.61575241106108	0.0003896090180847
Cc07_g08740	GSCOC_T00040262001	A0A068U3N6	Putative unknown protein; FUNCTIONS IN			-2.61510682767405	0.000253584090090696
Cc03_g05450	GSCOC_T00026300001	A0A068TSN3	Probable inorganic phosphate transporter 1-3	GO:0016021;GO:0005315;GO:0006817	AT2G38940	-2.61109902462747	1.75119652586819e-10
Cc03_g02460	GSCOC_T00025892001	A0A068TS95	Superoxide dismutase [Cu-Zn]	GO:0005829;GO:0005634;GO:0046872;GO:0004784;GO:0071280;GO:0071484;GO:0071457;GO:0071472;GO:0071329;GO:0071493;GO:0042742;GO:0035195;GO:0010039	AT1G08830	-2.6090429740549	2.68818353391668e-06
Cc02_g34260	GSCOC_T00000663001	A0A068V9B3	Putative Acetylajmalan esterase	GO:0016021;GO:0016788		-2.60894368219216	7.39751680146078e-06
Cc04_g10400	GSCOC_T00042588001	A0A068V3A1	Cucumisin	GO:0004252		-2.6082038733487	1.80788093473866e-07
Cc04_g13030	GSCOC_T00011367001	A0A068V8W3	Putative unknown protein; FUNCTIONS IN			-2.60229453213999	6.67139007620528e-08
Cc09_g03930	GSCOC_T00017485001	A0A068U6M9	Calreticulin-3	GO:0005788;GO:0005509;GO:0051082;GO:0006457	AT1G08450	-2.60034798767744	0.000146832045592374
Cc08_g09340	GSCOC_T00017283001	A0A068V6G6	Probable peptide transporter At1g52190	GO:0016021;GO:0022857		-2.59925344370797	1.45581340787542e-08
Cc05_g09780	GSCOC_T00021539001	A0A068UCD0	Putative Subtilisin-like protease	GO:0004252		-2.59622210883135	0.002430258389605
Cc05_g09640	GSCOC_T00021558001	A0A068UC82	Probable receptor-like protein kinase At2g42960	GO:0016021;GO:0005524;GO:0004672	AT2G42960	-2.59611854038486	0.00452994954762751
Cc08_g05190	GSCOC_T00042434001	A0A068V2Q0	Probable methyltransferase PMT20	GO:0016021;GO:0008168;GO:0032259		-2.59270629267157	0.00281131999650441
Cc08_g00040	GSCOC_T00005558001	A0A068VE20	ARM repeat superfamily protein			-2.59104166839609	0.000191151740590004
Cc10_g00160	GSCOC_T00024454001	A0A068UFL7	Putative Probable inactive serine/threonine-protein kinase bub1	GO:0007094	AT2G33560	-2.59077430324448	0.00984225303438796
Cc11_g01760	GSCOC_T00019521001	A0A068UAY5	Protein of unknown function, DUF642			-2.58636474315697	0.00373034865878884
Cc01_g14010	GSCOC_T00028386001	A0A068ULR4	zinc finger (C2H2 type) family protein			-2.58553390057049	0.00899845722643704
Cc01_g10450	GSCOC_T00024141001	A0A068UEP7	Serine carboxypeptidase-like 48	GO:0004185	AT3G45010	-2.57244226147799	0.0036062381287344
Cc11_g00610	GSCOC_T00004222001	A0A068VCI9	Glyceraldehyde-3-phosphate dehydrogenase A, chloroplastic	GO:0051287;GO:0050661;GO:0016620;GO:0006006	AT1G12900	-2.57227493570411	6.88464099647685e-13
Cc04_g05040	GSCOC_T00022245001	A0A068TSC2	Putative Bifunctional dihydroflavonol 4-reductase/flavanone 4-reductase	GO:0003824		-2.57025908834873	4.89471325987098e-07
Cc10_g09590	GSCOC_T00031523001	A0A068UQP3	Hypothetical protein	GO:0004869		-2.56686274810729	6.46967776525452e-07
Cc00_g16610	GSCOC_T00013784001	A0A068VI58	Arabinanase/levansucrase/invertase			-2.56548467614671	0.0072406110217055
Cc00_g03120	GSCOC_T00003068001	A0A068VAQ6	Putative Annexin D4	GO:0005509;GO:0005544	AT2G38750	-2.56371390653157	0.00410031642816001
Cc08_g10820	GSCOC_T00027061001	A0A068UIJ5	Putative Thromboxane-A synthase	GO:0016021;GO:0020037;GO:0005506;GO:0004497;GO:0016705	AT2G26170	-2.55506533882642	0.00439502536547365
Cc09_g07580	GSCOC_T00036236001	A0A068UWA3	Tubulin beta-3 chain	GO:0005737;GO:0005874;GO:0005525;GO:0003924;GO:0005200;GO:0007017	AT5G23860	-2.55309542536161	2.83258708967042e-06
Cc05_g11780	GSCOC_T00021271001	A0A068UBS1	Putative Ribosomal protein L11 methyltransferase	GO:0008276		-2.55286887050826	6.0555748413042e-06
Cc00_g18840	GSCOC_T00002533001	A0A068VIN9	Putative Major facilitator superfamily protein	GO:0016021;GO:0022857		-2.55150608999763	0.00398432282593189
Cc04_g03420	GSCOC_T00022037001	A0A068TP80	Putative ovate family protein 14	GO:0005634;GO:0045892		-2.54868391015307	0.00346335128109547
Cc06_g15060	GSCOC_T00030885001	A0A068UP96	Probable LRR receptor-like serine/threonine-protein kinase At2g24230	GO:0016021;GO:0005524;GO:0004672	AT2G24230	-2.54862464829932	0.00281179761386066
Cc02_g05410	GSCOC_T00039049001	A0A068UZE2	Transcription factor RF2b	GO:0003700	AT2G40620	-2.54813272955337	0.00263676757986859
Cc06_g09170	GSCOC_T00041949001	A0A068U4F3	Probable inactive receptor kinase At2g26730	GO:0016021;GO:0005886;GO:0005524;GO:0004672		-2.54536026845429	0.00754809996089068
Cc10_g06860	GSCOC_T00034603001	A0A068TXQ1	Phosphate-responsive 1 family protein		AT4G08950	-2.54521852029831	0.00144665449836806
Cc00_g20290	GSCOC_T00010953001	A0A068VJ54	Cysteine proteinase RD19a	GO:0008234	AT4G39090	-2.5429949451768	5.78197770100685e-06
Cc07_g04770	GSCOC_T00039738001	A0A068U222	Protein NSP-INTERACTING KINASE 1	GO:0016021;GO:0005524;GO:0004674	AT5G16000	-2.54206514390878	0.000625067823241063
Cc11_g11680	GSCOC_T00032413001	A0A068TW20	Putative uncharacterized protein	GO:0016021		-2.53454101523907	0.00152489099885238
Cc10_g07750	GSCOC_T00034483001	A0A068TXL6	Squalene monooxygenase	GO:0016021;GO:0050660;GO:0004506;GO:0016126	AT1G58440	-2.52978276027915	8.52329040376865e-05
Cc08_g01190	GSCOC_T00038420001	A0A068UYY5	Putative Glyoxylate reductase	GO:0051287;GO:0016616	AT1G12550	-2.52538302404826	0.00478493082936096
Cc02_g11300	GSCOC_T00029428001	A0A068TUQ3	Auxin response factor 18	GO:0005634;GO:0003677;GO:0009734;GO:0051301;GO:0007389;GO:0006355;GO:0048829	AT4G30080	-2.52445156899468	1.16510078757331e-08
Cc03_g08810	GSCOC_T00033320001	A0A068URT6	Putative Chaperone DnaJ-domain superfamily protein			-2.5235908605946	0.0004579412750807
Cc09_g01120	GSCOC_T00017852001	A0A068U7G0	Putative RING/U-box superfamily protein			-2.52093416014259	3.76502638928191e-08
Cc03_g08100	GSCOC_T00033202001	A0A068USC2	Probable sucrose-phosphate synthase 2	GO:0016157;GO:0046524;GO:0005985	AT1G04920	-2.51846217600087	4.50414599447444e-08
Cc10_g03310	GSCOC_T00024854001	A0A068UGE7	Geranylgeranyl pyrophosphate synthase, chloroplastic	GO:0016740;GO:0008299	AT4G36810	-2.51408801895763	1.31482689023862e-08
Cc06_g02880	GSCOC_T00023554001	A0A068UEF4	Short-chain dehydrogenase TIC 32, chloroplastic		AT4G23430	-2.51394177979416	2.86059101458582e-17
Cc05_g11100	GSCOC_T00021358001	A0A068UCU2	Peptide-N4-(N-acetyl-beta-glucosaminyl)asparagine amidase A	GO:0005774		-2.50665629539861	0.00354078439954409
Cc07_g07650	GSCOC_T00040119001	A0A068U299	Leucine-rich repeat receptor-like serine/threonine-protein kinase BAM1	GO:0016021;GO:0005524;GO:0004672	AT5G65700	-2.50612349612401	5.22152108400086e-06
Cc03_g02170	GSCOC_T00025854001	A0A068TU71	Putative Tip elongation aberrant protein 1			-2.50509870902097	0.00187658952229321
Cc07_g12630	GSCOC_T00036849001	A0A068TZR0	Putative P-loop containing nucleoside triphosphate hydrolases superfamily protein			-2.49987450977179	0.00257811678902934
Cc06_g04520	GSCOC_T00042964001	A0A068V3D7	Putative Zinc finger protein ZAT5			-2.4990338264069	0.00758345767657404
Cc02_g24640	GSCOC_T00028859001	A0A068UMK0	Putative Transcription factor UNE10	GO:0046983		-2.49829289843441	0.00411817518002746
Cc01_g01210	GSCOC_T00037967001	A0A068UY08	Putative Disease resistance response protein 206	GO:0048046		-2.48862339915194	0.000668552130803632
Cc10_g01870	GSCOC_T00024676001	A0A068UGK3	Filament-like plant protein 4		AT1G19835	-2.48640608014141	4.88266240694253e-08
Cc11_g13820	GSCOC_T00032134001	A0A068TW60	Putative Transcription factor bHLH79	GO:0046983;GO:0006355	AT5G62610	-2.48625094054031	0.00659270962479372
Cc08_g07720	GSCOC_T00011859001	A0A068VAL0	Hypothetical protein	GO:0004867		-2.48546330590563	0.00958465471373598
Cc03_g12940	GSCOC_T00030634001	A0A068UR06	Hypothetical protein			-2.48370847042224	4.44919579638082e-05
Cc11_g14190	GSCOC_T00032093001	A0A068TVC7	IAA-amino acid hydrolase ILR1-like 2	GO:0016787	AT5G56660	-2.48129789155574	5.51372380066612e-13
Cc08_g13530	GSCOC_T00030333001	A0A068UN29	Probable LRR receptor-like serine/threonine-protein kinase At1g12460	GO:0016021;GO:0005524;GO:0004672		-2.47818381895925	0.00826069886488274
Cc06_g01350	GSCOC_T00023351001	A0A068UE49	Hypothetical protein			-2.47795962324611	0.000479846161020548
Cc05_g11820	GSCOC_T00021266001	A0A068UCD3	Serine/threonine-protein kinase WNK (With No Lysine)-related			-2.47580818228505	0.000556220390421981
Cc00_g20110	GSCOC_T00006215001	A0A068VLS2	EXORDIUM like 2			-2.47416813410576	6.18414296248083e-05
Cc01_g21290	GSCOC_T00004997001	A0A068V996	Heat shock protein DnaJ with tetratricopeptide repeat			-2.47273395515057	0.00355204557503035
Cc07_g00540	GSCOC_T00019131001	A0A068V7M5	Putative unknown protein; BEST Arabidopsis thaliana protein match is			-2.47139409467476	6.64677037740436e-05
Cc01_g16480	GSCOC_T00016435001	A0A068U8I9	Putative quinone-oxidoreductase homolog, chloroplastic	GO:0016491		-2.47032907558498	2.52901539605206e-08
Cc07_g03150	GSCOC_T00039533001	A0A068U115	Putative Protein IQ-DOMAIN 31		AT1G74690	-2.46665181967922	1.97326090387807e-07
Cc02_g24310	GSCOC_T00002340001	A0A068VFY0	Putative lipid-binding protein At4g00165		AT4G00165	-2.46627966887364	0.00397641081458519
Cc04_g10890	GSCOC_T00042664001	A0A068V365	Leucine-rich repeat receptor-like serine/threonine/tyrosine-protein kinase SOBIR1	GO:0016021;GO:0005524;GO:0004672	AT2G31880	-2.45909877853998	0.00286362827552264
Cc06_g16920	GSCOC_T00004148001	A0A068VDM4	Guanylate kinase	GO:0004385		-2.4511093420798	0.000562739764239283
Cc04_g03050	GSCOC_T00021993001	A0A068TQ21	Photosystem I reaction center subunit VI, chloroplastic	GO:0009538;GO:0015979	AT3G16140	-2.4502589065255	1.24031686347767e-08
Cc04_g02940	GSCOC_T00021978001	A0A068TRM2	Probable peptide transporter At1g52190	GO:0016021;GO:0022857	AT1G52190	-2.43684813157384	5.21224213184025e-05
Cc06_g15140	GSCOC_T00030875001	A0A068URL0	Putative Reticulon-like protein B21	GO:0005789;GO:0016021	AT5G58000	-2.43147304139327	8.57900444021314e-07
Cc08_g00920	GSCOC_T00038450001	A0A068UYI7	Cellulose synthase A catalytic subunit 1 [UDP-forming]	GO:0016021;GO:0005886;GO:0016760;GO:0046872;GO:0071555;GO:0030244	AT4G32410	-2.43071365897923	1.79778136279686e-09
Cc02_g36780	GSCOC_T00003879001	A0A068VAE0	Endoglucanase 25	GO:0009504;GO:0005769;GO:0016021;GO:0005886;GO:0005802;GO:0008810;GO:0030244;GO:0030245;GO:0043622;GO:0042538;GO:0009735;GO:0048367;GO:0009826	AT5G49720	-2.43068529358519	1.71437401056201e-08
Cc07_g16820	GSCOC_T00037513001	A0A068UYX7	Cellulose synthase A catalytic subunit 5 [UDP-forming]	GO:0016021;GO:0005886;GO:0016760;GO:0046872;GO:0071555;GO:0030244		-2.42898831790131	0.000181143001165119
Cc02_g17060	GSCOC_T00014210001	A0A068TLZ3	Kinesin motor family protein	GO:0005524;GO:0008017;GO:0003777;GO:0007018	AT4G39050	-2.42189355357446	0.00248304007173439
Cc06_g05710	GSCOC_T00043135001	A0A068V4G0	Putative uncharacterized protein	GO:0009785	AT3G52740	-2.42097412283271	0.00165703814583564
Cc09_g09500	GSCOC_T00003714001	A0A068VEI6	Chlorophyll a-b binding protein 36, chloroplastic	GO:0009535;GO:0016021;GO:0009522;GO:0009523;GO:0016168;GO:0009765;GO:0018298	AT2G05100	-2.42080126657517	3.02872645594208e-06
Cc00_g22350	GSCOC_T00000296001	A0A068VJ65	Hypothetical protein			-2.42060801158533	0.00122819117134593
Cc02_g10270	GSCOC_T00029546001	A0A068TU83	Glucomannan 4-beta-mannosyltransferase 9	GO:0016021		-2.41811214430242	0.000103786602978048
Cc07_g04730	GSCOC_T00039730001	A0A068U425	Probable galacturonosyltransferase 9	GO:0005768;GO:0000139;GO:0016021;GO:0005802;GO:0047262;GO:0071555;GO:0045489		-2.41278593635247	5.80463565068938e-06
Cc02_g20400	GSCOC_T00014653001	A0A068TM92	Malate dehydrogenase, glyoxysomal	GO:0030060;GO:0005975;GO:0006108;GO:0006099	AT2G22780	-2.40575932283039	6.59185216454815e-07
Cc06_g06890	GSCOC_T00031328001	A0A068UQI4	Putative Uncharacterized protein		AT2G35880	-2.39767891215546	4.11762043958197e-08
Cc09_g08490	GSCOC_T00020817001	A0A068UAY3	Photosystem I reaction center subunit psaK, chloroplastic	GO:0009522;GO:0015979	AT1G30380	-2.39703737438257	2.65977592511114e-07
Cc06_g23550	GSCOC_T00040554001	A0A068V141	Organic cation/carnitine transporter 7	GO:0016021;GO:0022857	AT3G13050	-2.39394428457084	0.000552314062314933
Cc04_g16560	GSCOC_T00035761001	A0A068UVM0	Geranylgeranyl diphosphate reductase, chloroplastic	GO:0009941;GO:0009535;GO:0045550;GO:0016628;GO:0015995;GO:0015979	AT1G74470	-2.39365971678849	1.39803484621293e-05
Cc02_g04030	GSCOC_T00020306001	A0A068UAU4	EXORDIUM like 3	GO:0009505;GO:0009506;GO:0080167	AT5G51550	-2.39251599262903	6.31153452298441e-05
Cc05_g15080	GSCOC_T00038736001	A0A068V1H3	Cellulose synthase-like protein E6	GO:0016021;GO:0016760;GO:0071555;GO:0030244		-2.38862848202928	8.80768130526915e-07
Cc06_g07330	GSCOC_T00031278001	A0A068USB4	Putative Leucine-rich repeat receptor-like protein kinase TDR	GO:0016021;GO:0005524;GO:0004672		-2.38857208610739	6.73592432729816e-06
Cc00_g15710	GSCOC_T00006888001	P10795	Ribulose bisphosphate carboxylase small chain SSU11A, chloroplastic	GO:0009507;GO:0004497;GO:0016984;GO:0015977;GO:0009853;GO:0015979;GO:0009507;GO:0004497;GO:0016984;GO:0015977;GO:0009853;GO:0015979	AT1G67090	-2.38822097695462	1.10610028725273e-06
Cc06_g10260	GSCOC_T00041808001	A0A068U4R1	Dehydration-responsive element-binding protein 3	GO:0005634;GO:0003677;GO:0003700		-2.38692346432796	0.00202390361128505
Cc01_g14360	GSCOC_T00028434001	A0A068ULX1	Putative Probable NADH dehydrogenase	GO:0016491	AT1G07180	-2.38548910536947	5.85490046055874e-05
Cc02_g13670	GSCOC_T00029117001	A0A068TT80	Putative leucine-rich repeat receptor-like serine/threonine-protein kinase At2g14440	GO:0005768;GO:0016021;GO:0005802		-2.38238342716213	0.00206524142899495
Cc01_g10280	GSCOC_T00024113001	A0A068UHA7	Superoxide dismutase [Cu-Zn], chloroplastic	GO:0046872;GO:0004784	AT2G28190	-2.38122387674158	0.00557639808780332
Cc06_g04630	GSCOC_T00042976001	A0A068V3S0	UDP-glycosyltransferase 73C4	GO:0008194		-2.37738055889214	0.00122819117134593
Cc01_g08010	GSCOC_T00015487001	A0A068V4U3	Putative Probable carboxylesterase 15	GO:0016787	AT5G06570	-2.37729899855811	0.000277267982406386
Cc07_g19950	GSCOC_T00033902001	A0A068UVB1	Hypothetical protein			-2.37373512098306	0.00640667221027594
Cc01_g04780	GSCOC_T00028526001	A0A068UL67	Phospholipase A1-Igamma3, chloroplastic	GO:0006629	AT1G51440	-2.37134113548392	0.00672271245471042
Cc11_g08850	GSCOC_T00032819001	A0A068TXW8	Putative Spore coat protein A	GO:0005507;GO:0016491	AT1G71040	-2.3712311041352	5.64544965759544e-07
Cc00_g22120	GSCOC_T00009092001	A0A068VJR7	Putative MLP-like protein 28	GO:0006952		-2.36733128742876	0.000161537416604645
Cc02_g26270	GSCOC_T00028630001	A0A068ULJ6	Probable xyloglucan endotransglucosylase/hydrolase protein 30	GO:0048046;GO:0005618;GO:0004553;GO:0016762;GO:0071555;GO:0006073		-2.36150593560131	3.39950325691501e-06
Cc06_g23300	GSCOC_T00040592001	A0A068V162	Protein of unknown function (DUF620)			-2.36006788811044	0.00396079581325517
Cc02_g12940	GSCOC_T00029218001	A0A068TW57	Putative Epoxide hydrolase 2	GO:0003824		-2.35796351256318	0.000245839326694573
Cc02_g24030	GSCOC_T00015112001	A0A068TP69	UDP-glucuronate 4-epimerase 3	GO:0016021;GO:0003824		-2.35773244268623	0.00598357799363648
Cc06_g09850	GSCOC_T00041859001	A0A068U6S5	Putative uncharacterized protein			-2.35425956133329	0.00721608655856097
Cc07_g11130	GSCOC_T00037035001	A0A068U029	Protein MID1-COMPLEMENTING ACTIVITY 1			-2.3513959000536	0.00633396068305288
Cc00_g22710	GSCOC_T00002421001	A0A068VMK3	Putative Protein of unknown function (DUF581)		AT2G25690	-2.3513308757199	0.00388513511189822
Cc00_g02000	GSCOC_T00000828001	A0A068VA84	Mitochondrial transcription termination factor family protein	GO:0003690;GO:0006355	AT2G03050	-2.34862541079641	9.74218830668352e-06
Cc10_g06720	GSCOC_T00034619001	A0A068TYV4	Thylakoid lumenal 29 kDa protein, chloroplastic	GO:0020037;GO:0004601;GO:0006979	AT4G09010	-2.34570709086263	5.1138762756057e-10
Cc06_g11680	GSCOC_T00041629001	A0A068U3K5	Lycopene epsilon cyclase, chloroplastic	GO:0016705;GO:0016117	AT5G57030	-2.34446872815232	1.89482838073423e-06
Cc02_g39450	GSCOC_T00027714001	A0A068UKD1	Putative Protein ASPARTIC PROTEASE IN GUARD CELL 1	GO:0004190	AT1G01300	-2.34099841168637	0.000128103087724554
Cc00_g23530	GSCOC_T00009087001	A0A068VK77	Serine carboxypeptidase-like 13	GO:0004185	AT1G73310	-2.34035285266429	0.00508913591506133
Cc00_g22730	GSCOC_T00008889001	A0A068VJA1	Putative Reticuline oxidase	GO:0050660;GO:0016491		-2.33429668172319	0.0099914338865921
Cc09_g01650	GSCOC_T00017780001	A0A068U9W5	ATP synthase gamma chain, chloroplastic	GO:0045261;GO:0046933;GO:0015986	AT4G04640	-2.33329030751938	1.28711760557215e-05
Cc09_g02010	GSCOC_T00017735001	A0A068U7U0	Chlorophyll a-b binding protein 6A, chloroplastic	GO:0009535;GO:0016021;GO:0009522;GO:0009523;GO:0016168;GO:0009765;GO:0018298	AT3G54890	-2.32864182104609	0.000914095529742807
Cc03_g01750	GSCOC_T00025797001	A0A068TRJ1	Putative Transducin/WD40 repeat-like superfamily protein			-2.32749830405079	0.0010541664728238
Cc00_g05170	GSCOC_T00000315001	A0A068VCP2	Putative Cytochrome P450 86B1	GO:0020037;GO:0005506;GO:0004497;GO:0016705	AT1G57750	-2.32407096648946	0.0033939434271668
Cc01_g21470	GSCOC_T00004976001	A0A068V8U3	Putative uncharacterized protein		AT3G62390	-2.31323176366726	0.000295121047167873
Cc02_g00220	GSCOC_T00019798001	A0A068UBA4	Syntaxin-22	GO:0016021;GO:0005770;GO:0030140;GO:0005484;GO:0045324;GO:0006623	AT5G46860	-2.31026293734799	0.00341133344921763
Cc07_g11750	GSCOC_T00036964001	A0A068U0V7	Undecaprenyl diphosphate synthase, putative	GO:0016765	AT2G17570	-2.31011660528048	0.00344947731952026
Cc03_g03330	GSCOC_T00026017001	A0A068TSS5	Glucose-1-phosphate adenylyltransferase large subunit 1, chloroplastic	GO:0009941;GO:0009570;GO:0005524;GO:0008878;GO:0005978;GO:0019252	AT5G19220	-2.30943436914802	2.01014279245516e-07
Cc04_g00340	GSCOC_T00021638001	A0A068TQX2	O-fucosyltransferase family protein	GO:0016021;GO:0016757;GO:0006004	AT1G51630	-2.306567831929	1.209606826826e-07
Cc11_g11950	GSCOC_T00032378001	A0A068TWV6	Putative unknown protein; BEST Arabidopsis thaliana protein match is	GO:0008356		-2.3058204591994	0.00359248849971586
Cc02_g34060	GSCOC_T00000637001	A0A068V997	Putative Transcription factor bHLH19		AT4G37850	-2.30263862308545	0.00318498870641474
Cc10_g01790	GSCOC_T00024666001	A0A068UGS0	Protein disulfide-isomerase LQY1	GO:0016021	AT1G75690	-2.30226472254508	0.00458205566417222
Cc10_g09130	GSCOC_T00034292001	Q2TM26	Putative Hydroxysteroid 11-beta-dehydrogenase 1-like protein	GO:0016491		-2.29560873416664	0.000106099496804315
Cc11_g13330	GSCOC_T00032194001	A0A068TVN3	myb domain protein 88	GO:0005634;GO:0003677	AT2G02820	-2.29390299090132	9.45137009480594e-05
Cc11_g10230	GSCOC_T00032605001	A0A068TWI1	Alpha-xylosidase	GO:0030246;GO:0004553;GO:0005975		-2.29044359954759	0.000820374197849346
Cc03_g00620	GSCOC_T00025647001	A0A068TTT9	Putative uncharacterized protein			-2.29036761746622	5.15511656473655e-10
Cc02_g38130	GSCOC_T00027903001	A0A068UK18	Glycerol-3-phosphate acyltransferase 4	GO:0016021;GO:0016746	AT4G00400	-2.29025466575778	0.0020770558595587
Cc10_g11220	GSCOC_T00018468001	A0A068V7G0	UDP-glycosyltransferase 85A1	GO:0008194	AT1G22400	-2.28492841508721	0.000567906631386317
Cc08_g01300	GSCOC_T00038405001	A0A068V0M9	photosystem II subunit X	GO:0016021;GO:0009523;GO:0015979		-2.28303167931426	6.63997753749192e-06
Cc07_g18500	GSCOC_T00018744001	A0A068U8W9	Magnesium-chelatase subunit chlI, chloroplastic	GO:0009507;GO:0005524;GO:0016851;GO:0015995;GO:0015979	AT5G45930	-2.28184549132944	1.82742368624865e-06
Cc02_g32730	GSCOC_T00016689001	A0A068V5J5	Putative Prefoldin chaperone subunit family protein	GO:0016021		-2.2704480141677	3.4814195778445e-05
Cc02_g39840	GSCOC_T00027658001	A0A068UJB2	S-adenosyl-L-methionine-dependent methyltransferases superfamily protein			-2.27005314252936	2.58104334263403e-05
Cc05_g10850	GSCOC_T00021389001	A0A068UCX1	Probable leucine-rich repeat receptor-like serine/threonine-protein kinase At3g14840	GO:0016021;GO:0005524;GO:0004672		-2.26332888347065	5.08042735016557e-08
Cc05_g12020	GSCOC_T00021242001	A0A068UCB5	Protein kinase superfamily protein	GO:0005886;GO:0005524;GO:0004672	AT1G09600	-2.2586870982236	5.78197770100685e-06
Cc09_g04550	GSCOC_T00017412001	A0A068U921	Leucine-rich repeat receptor-like serine/threonine-protein kinase BAM3	GO:0016021;GO:0005524;GO:0004672	AT4G20270	-2.25679232123047	0.00582174689145196
Cc06_g20800	GSCOC_T00015871001	A0A068V7C4	Putative Macrophage migration inhibitory factor homolog			-2.25665208933812	0.00932323421213385
Cc11_g05000	GSCOC_T00020436001	A0A068UAU1	Receptor-like protein kinase FERONIA	GO:0016021;GO:0005524;GO:0004672	AT3G51550	-2.2521587455633	0.00303058368920457
Cc07_g15630	GSCOC_T00036453001	A0A068TYR9	Peptidyl-prolyl cis-trans isomerase FKBP16-2, chloroplastic	GO:0003755	AT4G39710	-2.25159854039257	0.000427891421651422
Cc06_g07130	GSCOC_T00031301001	A0A068USD2	Uncharacterized protein	GO:0016021;GO:0016757;GO:0006486		-2.24943251827416	0.00919497068007057
Cc09_g06740	GSCOC_T00005130001	A0A068VAL3	Putative Transmembrane protein 56	GO:0016021		-2.24760094929072	0.00269177305992161
Cc02_g16920	GSCOC_T00014194001	A0A068TNQ0	ATP binding microtubule motor family protein	GO:0005874;GO:0005524;GO:0008017;GO:0003777;GO:0007018	AT2G21300	-2.24672956909036	2.83627887692961e-11
Cc11_g04720	GSCOC_T00042899001	A0A068V3N8	PsbP-like protein 1, chloroplastic	GO:0019898;GO:0009654;GO:0005509;GO:0015979		-2.24377382580837	0.00190809416805188
Cc03_g04070	GSCOC_T00026114001	A0A068TUR5	Type I inositol 1,4,5-trisphosphate 5-phosphatase CVP2	GO:0046856	AT1G05470	-2.24356112914751	0.00783043608536084
Cc09_g06610	GSCOC_T00005114001	A0A068VA82	Photosystem I reaction center subunit III, chloroplastic	GO:0009941;GO:0009535;GO:0009538;GO:0010287;GO:0019904;GO:0015979	AT1G31330	-2.24303702482176	4.48775988262851e-08
Cc10_g07070	GSCOC_T00034570001	A0A068TYR8	Probable pectin methyltransferase QUA2	GO:0005768;GO:0016021;GO:0005802;GO:0008168;GO:0010289;GO:0032259;GO:0009735;GO:0048364;GO:0048367	AT1G78240	-2.24209817441758	0.00659980726116022
Cc04_g07490	GSCOC_T00022569001	A0A068TSZ5	Duplicated homeodomain-like superfamily protein	GO:0005634;GO:0003677	AT5G08520	-2.24182148185715	0.00364772635175219
Cc07_g14870	GSCOC_T00036559001	A0A068TZI7	Putative Protein CbbY	GO:0016787	AT4G39970	-2.2375815252005	3.47847642497462e-08
Cc11_g08090	GSCOC_T00032922001	A0A068TX05	Protein PLANT CADMIUM RESISTANCE 2	GO:0016021		-2.23582612936167	0.000101205165839331
Cc05_g16370	GSCOC_T00038571001	A0A068UZ98	Phosphoglycerate kinase, cytosolic	GO:0005524;GO:0004618;GO:0006096	AT1G56190	-2.23543302487735	6.47735192441598e-09
Cc10_g14740	GSCOC_T00033620001	A0A068US77	Fructose-1,6-bisphosphatase, cytosolic	GO:0005829;GO:0005634;GO:0042132;GO:0030388;GO:0015979;GO:0009737;GO:0009750;GO:0005983;GO:0005986	AT1G43670	-2.23366916168746	1.37559371836224e-05
Cc06_g06300	GSCOC_T00031400001	A0A068UQC2	IAA-amino acid hydrolase ILR1-like 7	GO:0016787		-2.23067767815431	0.0082188213305673
Cc06_g12610	GSCOC_T00041515001	A0A068U3Y2	Peroxiredoxin Q, chloroplastic	GO:0004601;GO:0051920		-2.22403253598366	0.000295668679456292
Cc00_g13410	GSCOC_T00003236001	A0A068VGC2	Receptor-like protein kinase FERONIA	GO:0016021;GO:0005524;GO:0004672	AT3G51550	-2.22161221309611	0.00733074862973079
Cc01_g10910	GSCOC_T00024207001	A0A068UF17	Receptor-like serine/threonine-protein kinase NCRK	GO:0016021;GO:0005524;GO:0004672		-2.21858109117228	2.07274230788944e-05
Cc07_g10350	GSCOC_T00037127001	A0A068U185	Putative GATA transcription factor 5	GO:0005634;GO:0043565;GO:0008270;GO:0006355	AT5G66320	-2.21293521754355	1.26315605309935e-07
Cc03_g09250	GSCOC_T00042693001	A0A068V3H8	Probable metal-nicotianamine transporter YSL6	GO:0016021;GO:0055085	AT3G27020	-2.20088805826821	0.00401766509532369
Cc08_g14480	GSCOC_T00030217001	A0A068UMV2	Probable LRR receptor-like serine/threonine-protein kinase At1g63430	GO:0016021;GO:0005524;GO:0004672		-2.1979875972344	0.000372041227937071
Cc02_g11290	GSCOC_T00029429001	A0A068TWN2	Putative GATA transcription factor 9	GO:0005634;GO:0043565;GO:0008270;GO:0007623;GO:0045893;GO:0009845	AT3G54810	-2.19770804645948	7.52926130512151e-05
Cc04_g15550	GSCOC_T00042327001	A0A068V4Q9	Protein of unknown function (DUF1118)	GO:0016021		-2.1969089275605	7.01674641979306e-07
Cc08_g02390	GSCOC_T00037711001	A0A068UZB5	Glycine cleavage system H protein, mitochondrial	GO:0005960;GO:0005739;GO:0019464	AT1G32470	-2.19619028354481	0.00184723946874396
Cc01_g03610	GSCOC_T00033080001	A0A068URA5	Callose synthase 3	GO:0000148;GO:0016021;GO:0003843;GO:0006075	AT5G13000	-2.1957534487862	3.69007532130245e-06
Cc02_g14920	GSCOC_T00013918001	A0A068TN61	Putative Endoribonuclease Dicer homolog 2	GO:0004525;GO:0006396	AT3G03300	-2.19216313351123	0.000445412897505811
Cc11_g14350	GSCOC_T00032069001	A0A068TWA2	Hypothetical protein	GO:0008080		-2.19118046014901	0.000151613990357262
Cc07_g10330	GSCOC_T00037131001	A0A068U098	Putative Leucine-rich repeat receptor-like protein kinase PEPR2			-2.18874353419054	7.94507124242201e-05
Cc02_g18910	GSCOC_T00014451001	A0A068TMK1	Probable receptor-like protein kinase At1g49730	GO:0016021;GO:0005524;GO:0004672		-2.1873917183882	0.00369151174222207
Cc00_g26730	GSCOC_T00003169001	A0A068VL68	Anthocyanidin 5,3-O-glucosyltransferase	GO:0008194	AT3G16520	-2.18698496449529	1.99776184158454e-06
Cc00_g27010	GSCOC_T00011934001	A0A068VL90	UDP-glucuronate 4-epimerase 1	GO:0016021		-2.18572243396256	0.00969121874320963
Cc04_g09710	GSCOC_T00000092001	A0A068VJ03	Probable arabinose 5-phosphate isomerase	GO:0097367;GO:0016853;GO:1901135;GO:0005975		-2.18495534267852	0.000202253811165672
Cc02_g01650	GSCOC_T00019993001	A0A068U989	CCT motif family protein	GO:0005634	AT5G57660	-2.1831833487766	7.20663547554595e-05
Cc09_g02390	GSCOC_T00017684001	A0A068U823	Putative Uncharacterized CDP-alcohol phosphatidyltransferase class-I family protein C22A12.08c			-2.1830712635121	0.00318498870641474
Cc11_g08100	GSCOC_T00032921001	A0A068TY20	Protein PLANT CADMIUM RESISTANCE 2	GO:0016021		-2.18181800279423	0.000694023683094825
Cc03_g11110	GSCOC_T00042068001	A0A068V2D4	Hypothetical protein			-2.18018640711376	8.61420951101842e-05
Cc04_g12980	GSCOC_T00011361001	A0A068V8V9	Rac-like GTP-binding protein 3	GO:0005525;GO:0003924;GO:0007264	AT5G62880	-2.18002409076256	0.00025647934046123
Cc07_g09660	GSCOC_T00037213001	A0A068U318	Putative Transcription factor bHLH64	GO:0046983;GO:0006355	AT4G34530	-2.17836832339746	0.00730831650320765
Cc02_g37510	GSCOC_T00027980001	A0A068UML9	( )-neomenthol dehydrogenase	GO:0016491	AT2G24190	-2.17720970770963	1.59711252099663e-08
Cc01_g01310	GSCOC_T00037929001	A0A068UXZ8	Hypothetical protein			-2.17649327529176	5.76345966118131e-05
Cc07_g15660	GSCOC_T00036449001	A0A068U1C2	C2 domain-containing protein	GO:0010330;GO:0055028;GO:0009898;GO:0005794;GO:0036449;GO:0009506;GO:0008017;GO:0051211;GO:0009901;GO:0030244;GO:0010215;GO:0043622;GO:0048467;GO:0009833;GO:0048868;GO:0010208;GO:0072699;GO:0070507;GO:2000067;GO:0051592;GO:0009414	AT2G22125	-2.17381526289037	7.65822577878795e-08
Cc03_g00600	GSCOC_T00025645001	A0A068TR99	Putative Plant invertase/pectin methylesterase inhibitor superfamily protein	GO:0004857	AT1G47960	-2.17306681458259	0.00979666804399112
Cc00_g26750	GSCOC_T00003171001	A0A068VKV6	Anthocyanidin 5,3-O-glucosyltransferase	GO:0008194	AT3G16520	-2.17076345330749	0.00027877434543457
Cc11_g04990	GSCOC_T00020432001	A0A068UA86	Receptor-like protein kinase FERONIA	GO:0016021;GO:0005524;GO:0004672	AT3G51550	-2.16134281438597	0.00977460142762831
Cc03_g08410	GSCOC_T00033258001	A0A068URP2	Putative HXXXD-type acyl-transferase family protein	GO:0016747	AT4G13840	-2.15804657270961	0.000181078499839367
Cc00_g00210	GSCOC_T00036098001	A0A068UXX8	Auxin response factor 19	GO:0005634;GO:0003677;GO:0009734;GO:0006355	AT1G19220	-2.15782509120561	0.00125080218789349
Cc02_g08570	GSCOC_T00029776001	A0A068TUN4	Chalcone--flavonone isomerase	GO:0016872	AT3G55120	-2.14824219457165	0.000350772319920464
Cc07_g02590	GSCOC_T00039457001	A0A068U1X1	Peroxidase 63	GO:0005576;GO:0020037;GO:0046872;GO:0004601;GO:0042744;GO:0006979	AT5G40150	-2.14481886736778	0.0041979061554859
Cc06_g03680	GSCOC_T00023657001	A0A068UEQ0	Putative uncharacterized protein			-2.14287996091952	0.00027877434543457
Cc05_g14450	GSCOC_T00038818001	A0A068UZE0	Putative Acyl-CoA--sterol O-acyltransferase 1	GO:0016021;GO:0008374		-2.13984921713034	9.00413543389347e-11
Cc05_g08540	GSCOC_T00016878001	Q1W7A9	DNAJ heat shock N-terminal domain-containing protein	GO:0009507;GO:0009507		-2.13769763007927	0.00832425537247617
Cc06_g14920	GSCOC_T00030903001	A0A068UP09	Putative Gibberellin 2-beta-dioxygenase 8	GO:0046872;GO:0016491		-2.13171329246819	6.30218469849132e-05
Cc09_g00300	GSCOC_T00017965001	A0A068UA90	Putative Probable ADP-ribosylation factor GTPase-activating protein AGD11	GO:0005886;GO:0005773	AT5G47710	-2.1311561181462	1.45847567277813e-05
Cc02_g22350	GSCOC_T00014904001	A6XBK9	Probable plastid-lipid-associated protein 4, chloroplastic		AT3G26070	-2.12933766731198	0.000306632211357237
Cc06_g21340	GSCOC_T00018132001	A0A068V8T8	Putative hydroxyproline-rich glycoprotein family protein	GO:0016021		-2.12576243704211	9.32090780728687e-08
Cc05_g00840	GSCOC_T00013178001	A0A068VBC0	Oxygen-evolving enhancer protein 2, chloroplastic	GO:0019898;GO:0009654;GO:0005509;GO:0015979	AT1G06680	-2.12433762951038	6.12029855659776e-08
Cc08_g13470	GSCOC_T00030341001	A0A068UNH9	Armadillo repeat-containing kinesin-like protein 3	GO:0005874;GO:0009574;GO:0005524;GO:0008017;GO:0003777;GO:0007018;GO:0032886;GO:0048364	AT2G47500	-2.12011898687643	0.00256506832435244
Cc10_g00410	GSCOC_T00024491001	A0A3P8MYI3	Glyceraldehyde-3-phosphate dehydrogenase B, chloroplastic	GO:0051287;GO:0050661;GO:0016620;GO:0006006	AT1G42970	-2.11552558561909	1.3697124056043e-08
Cc03_g01200	GSCOC_T00025725001	A0A068TRE9	Putative P-loop containing nucleoside triphosphate hydrolases superfamily protein	GO:0016021		-2.1142475501569	0.00139843792488795
Cc06_g15570	GSCOC_T00030803001	A0A068UNU7	Putative zinc finger protein 8		AT2G41940	-2.11303448429101	2.51389249387188e-05
Cc01_g18800	GSCOC_T00016154001	A0A068U5G2	Photosystem II reaction center W protein, chloroplastic	GO:0009507;GO:0016021;GO:0009523;GO:0015979	AT2G30570	-2.1120853667696	3.74098841482731e-05
Cc00_g11840	GSCOC_T00007750001	A0A068VFZ9	Hypothetical protein			-2.10990226050964	0.00189488404349916
Cc01_g13360	GSCOC_T00028301001	A0A068ULJ4	plastid transcriptionally active 16		AT3G46780	-2.10805760891856	5.43815812020668e-07
Cc07_g16900	GSCOC_T00037502001	A0A068UWB9	Citrate-binding protein			-2.10637331171173	0.00934215431007316
Cc04_g05520	GSCOC_T00022311001	A0A068TPW7	Unknown protein DS12 from 2D-PAGE of leaf, chloroplastic	GO:0009941;GO:0009570;GO:0009535;GO:0010319;GO:0009409;GO:0009416;GO:0009744	AT1G16880	-2.1038253831597	7.01674641979306e-07
Cc00_g24310	GSCOC_T00006031001	A0A068VN22	Putative UDP-rhamnose	GO:0016021;GO:0008194		-2.10269174415309	0.000781173577051507
Cc02_g19270	GSCOC_T00014491001	A0A068TPF4	Cinnamyl alcohol dehydrogenase 1	GO:0016491;GO:0008270		-2.10103079942494	4.57565415893987e-05
Cc09_g09300	GSCOC_T00023067001	A0A068UCV6	Mitochondrial carnitine/acylcarnitine carrier-like protein	GO:0016021	AT5G46800	-2.09932358221972	2.05106245308753e-11
Cc02_g28020	GSCOC_T00025162001	A0A068UHN5	Cellulose synthase A catalytic subunit 3 [UDP-forming]	GO:0016021;GO:0005886;GO:0016760;GO:0046872;GO:0071555;GO:0030244		-2.09895057039204	1.88083339242206e-06
Cc02_g00580	GSCOC_T00019842001	A0A068U9T8	UP-9A	GO:0098869	AT5G24660	-2.09816305831774	0.00356775645735517
Cc09_g08670	GSCOC_T00020843001	A0A068UBV7	Putative BAG family molecular chaperone regulator 2	GO:0051087		-2.09790056035858	2.73505920288538e-07
Cc09_g00480	GSCOC_T00017944001	A0A068U7I7	Pentatricopeptide repeat-containing protein At4g16390, chloroplastic		AT4G16390	-2.09719517618043	1.07137395172314e-06
Cc11_g05410	GSCOC_T00020497001	A0A068UCS2	Putative phagocytic receptor 1b	GO:0016021	AT2G01970	-2.09711628096414	0.000591091530719363
Cc11_g12890	GSCOC_T00032253001	A0A068TVN4	Putative Homeodomain-like superfamily protein	GO:0005634;GO:0003677		-2.09699926541222	0.00403532569922538
Cc02_g16660	GSCOC_T00014159001	A0A068TLV5	Putative Aquaporin AQPcic	GO:0016021;GO:0015267		-2.09531191037757	0.0096766952869617
Cc01_g19600	GSCOC_T00016039001	A0A068U534	TRICHOME BIREFRINGENCE-LIKE 11	GO:0016021		-2.09508165027863	0.00595652847882923
Cc02_g09420	GSCOC_T00029657001	A0A068TUF7	INVOLVED IN	GO:0009522;GO:0015979		-2.09235325798933	0.000447887304896133
Cc00_g16400	GSCOC_T00011388001	A0A068VKP0	( )-neomenthol dehydrogenase	GO:0016491	AT2G24190	-2.09113206847797	2.58104334263403e-05
Cc06_g18300	GSCOC_T00040439001	A0A068V0B2	Putative IQ-domain 12			-2.08757958352989	0.00969949697392664
Cc00_g29940	GSCOC_T00006232001	A0A068VM31	Beta-galactosidase	GO:0004553;GO:0005975		-2.08693807296301	0.00420419145736244
Cc07_g15500	GSCOC_T00036468001	A0A068TZQ3	Putative Pollen allergen Che a 1	GO:0005615		-2.08533015283005	3.05316495491749e-09
Cc06_g16900	GSCOC_T00004144001	A0A068VDK7	GTP-binding protein TypA/BipA homolog	GO:0009570;GO:0005525;GO:0003924;GO:0031425;GO:0010468;GO:0000302		-2.08515027294565	0.00125080218789349
Cc09_g02150	GSCOC_T00017712001	A0A068U9R5	Putative Monoglyceride lipase			-2.08489573553125	1.94819137338574e-05
Cc01_g15890	GSCOC_T00016506001	A0A068U6P1	Photosystem I reaction center subunit XI, chloroplastic	GO:0016021;GO:0009538;GO:0015979	AT4G12800	-2.0830553850162	9.48704455041823e-06
Cc02_g12370	GSCOC_T00029291001	A0A068TTM2	ARM repeat superfamily protein			-2.07551825242362	0.00502574968448045
Cc10_g03230	GSCOC_T00024846001	A0A068UIU7	PPPDE putative thiol peptidase family protein		AT4G17486	-2.07509658140018	0.00410031642816001
Cc02_g38860	GSCOC_T00027800001	A0A068UMB4	Uncharacterized protein At4g01150, chloroplastic	GO:0009941;GO:0009535;GO:0009515;GO:0016021;GO:0010287;GO:0090391;GO:0097753	AT4G01150	-2.07431458925358	2.64542666802218e-07
Cc10_g01210	GSCOC_T00024589001	A0A068UFV6	E3 ubiquitin-protein ligase ATL23	GO:0016021		-2.0734179019056	0.00282389127321019
Cc10_g04270	GSCOC_T00034955001	A0A068TZI5	Probable protein phosphatase 2C 12	GO:0005829;GO:0004722		-2.06583257700365	0.000316344359765411
Cc01_g09970	GSCOC_T00024074001	A0A068UFC7	Putative Bifunctional polymyxin resistance protein ArnA	GO:0003824	AT1G08200	-2.06466184185933	3.61709111961133e-05
Cc04_g02520	GSCOC_T00021925001	A0A068TNZ1	Putative proline-rich receptor-like protein kinase PERK11	GO:0016021;GO:0005524;GO:0004672		-2.0585397428146	0.00714054957001865
Cc04_g03020	GSCOC_T00021988001	A0A068TP38	Putative Uncharacterized protein At4g01150, chloroplastic	GO:0016021;GO:0009579	AT1G52220	-2.05707573702806	2.5984248563562e-06
Cc09_g08230	GSCOC_T00020763001	A0A068UAM5	Outer arm dynein light chain 1 protein			-2.05551367922516	7.09064875967627e-07
Cc01_g19960	GSCOC_T00015991001	A0A068U4U3	Putative LRR receptor-like serine/threonine-protein kinase ERECTA			-2.05337844307045	0.000373864110677454
Cc05_g09690	GSCOC_T00021550001	A0A068UC75	Putative GDSL esterase/lipase At4g10955	GO:0006629		-2.0524157040854	5.40743131904663e-05
Cc11_g01680	GSCOC_T00019534001	A0A068U8K3	3-ketoacyl-CoA synthase 11	GO:0016021;GO:0016747;GO:0006633		-2.0521822217893	0.000334635657485818
Cc07_g06440	GSCOC_T00039949001	A0A068U302	Probable LRR receptor-like serine/threonine-protein kinase At4g37250	GO:0016021;GO:0005524;GO:0004672		-2.04928643940177	0.00505808849654319
Cc10_g01080	GSCOC_T00024574001	A0A068UI84	Plastocyanin, chloroplastic	GO:0009535;GO:0005507;GO:0009055	AT1G20340	-2.04763953974923	0.00173118014884781
Cc05_g12090	GSCOC_T00021233001	A0A068UBH7	Putative Protein of unknown function (DUF2921)	GO:0016021		-2.04671265313999	0.00133206863323831
Cc05_g15930	GSCOC_T00038624001	A0A068V149	Photosystem II 10 kDa polypeptide, chloroplastic	GO:0009535;GO:0016021;GO:0009654;GO:0010270	AT1G79040	-2.04558879905262	2.32297069198008e-06
Cc11_g08830	GSCOC_T00032821001	A0A068TX03	Putative uncharacterized protein	GO:0005634;GO:0003677		-2.03804855785421	0.00296199543911815
Cc07_g06660	GSCOC_T00039983001	A0A068U211	Putative transducin family protein / WD-40 repeat family protein			-2.03690618868031	0.0082011715220769
Cc08_g05610	GSCOC_T00024342001	A0A068UG18	Probable carotenoid cleavage dioxygenase 4, chloroplastic	GO:0046872;GO:0016702	AT4G19170	-2.03429546420113	0.00269198971820104
Cc00_g07730	GSCOC_T00002546001	A0A068VEW4	Putative Probable LRR receptor-like serine/threonine-protein kinase At3g47570	GO:0016021;GO:0005524;GO:0004672		-2.03257705008492	0.00496238397919068
Cc10_g07600	GSCOC_T00034501001	A0A068TXN0	Putative uncharacterized protein			-2.02219793676692	0.00111993057744417
Cc11_g15050	GSCOC_T00001024001	A0A068VE18	Hypothetical protein	GO:0005694;GO:0005634;GO:0018024;GO:0008270		-2.02194256865629	0.00763237537349448
Cc02_g17340	GSCOC_T00014246001	A0A068TL29	Glucose-1-phosphate adenylyltransferase large subunit 1 (Fragment)	GO:0009507;GO:0005524;GO:0008878;GO:0005978;GO:0019252	AT4G39210	-2.01994296617064	0.00539454802570376
Cc00_g13970	GSCOC_T00010018001	A0A068VH95	Putative Monoglyceride lipase			-2.01402868583509	0.00341958319346222
Cc08_g00530	GSCOC_T00038504001	A0A068UYA3	ATP synthase subunit b', chloroplastic	GO:0016021;GO:0045263;GO:0015078;GO:0015986		-2.00802421451075	2.03349865209883e-08
Cc11_g08370	GSCOC_T00032885001	A0A068TXM4	Putative MLP-like protein 28	GO:0006952		-2.00779147132142	0.00114232242914544
Cc06_g14520	GSCOC_T00041247001	A0A068U2X3	Serine carboxypeptidase-like 29	GO:0004185	AT4G30810	-2.00733729305358	0.00439845331691343
Cc02_g02470	GSCOC_T00020102001	A0A068UBY8	Putative uncharacterized protein	GO:0016021		-2.00645150466372	0.000351260217190033
Cc06_g06270	GSCOC_T00031404001	A0A068UQV2	Putative Lysosomal Pro-X carboxypeptidase	GO:0008236		-2.0063151880438	7.83097405409296e-06
Cc08_g00750	GSCOC_T00038470001	A0A068V0T7	Putative esterase HI_1161			-2.00313558930175	0.00397018116774518
Cc05_g08180	GSCOC_T00016832001	A0A068V5S4	Putative uncharacterized protein OSJNBa0095J15.6			-2.00104376794229	9.28977238573048e-06
Cc02_g18330	GSCOC_T00014373001	A0A068TMF8	Putative Naringenin,2-oxoglutarate 3-dioxygenase (Fragment)	GO:0046872;GO:0016491		-2.0002424306524	0.0018543425938558
Cc02_g07630	GSCOC_T00029911001	A0A068TVY7	Protein FIZZY-RELATED 3	GO:0010997;GO:0097027;GO:1904668		-1.99631346732835	0.00394778376469073
Cc02_g39400	GSCOC_T00027722001	A0A068UKF0	Putative Uncharacterized membrane protein yuiD			-1.98858594987711	1.80280058159049e-05
Cc00_g13430	GSCOC_T00003238001	A0A068VH18	Receptor-like protein kinase FERONIA	GO:0016021;GO:0005524;GO:0004672	AT3G51550	-1.9843035129974	0.00639163007615869
Cc07_g06710	GSCOC_T00039992001	A0A068U214	Putative Sigma factor sigB regulation protein rsbQ		AT4G37470	-1.97581401950209	7.06256622047545e-05
Cc08_g12260	GSCOC_T00030505001	A0A068UQU2	Putative Formyltetrahydrofolate deformylase	GO:0008864;GO:0016742;GO:0006189		-1.97459663663159	0.00622041595367098
Cc00_g00260	GSCOC_T00036104001	A0A068UXY3	Putative Uncharacterized protein At1g28695	GO:0016021	AT1G28695	-1.96879529284934	0.00135114968663509
Cc06_g19020	GSCOC_T00028944001	A0A068UM47	Putative NADP-dependent alkenal double bond reductase P1	GO:0016491		-1.96733524802319	0.00014039652345995
Cc10_g01220	GSCOC_T00024591001	A0A068UGE1	Thioredoxin superfamily protein			-1.96538649982391	2.39711846121028e-06
Cc09_g03200	GSCOC_T00017579001	Q9ULK2	Violaxanthin de-epoxidase, chloroplastic	GO:0009507;GO:0046422		-1.96393601537935	3.88673572918562e-05
Cc06_g01630	GSCOC_T00023391001	A0A068UE05	unknown protein; FUNCTIONS IN			-1.96366208205039	0.00246783652737681
Cc04_g15610	GSCOC_T00042334001	A0A068V2Y1	Integral membrane HPP family protein	GO:0016021		-1.96232084156366	5.28847062884451e-05
Cc06_g04020	GSCOC_T00023706001	A0A068UE68	Adenosine kinase 2	GO:0004001;GO:0006166	AT5G03300	-1.96202176952009	3.04201462880749e-08
Cc11_g03240	GSCOC_T00025446001	A0A068UI72	Remorin family protein			-1.96139789065338	0.00291320951810276
Cc02_g39880	GSCOC_T00027649001	A0A068UJI7	CBL-interacting serine/threonine-protein kinase 9	GO:0005524;GO:0004674;GO:0007165	AT1G01140	-1.95902734221822	8.86350484965185e-05
Cc10_g03340	GSCOC_T00024858001	A0A068UH82	unknown protein; FUNCTIONS IN			-1.95818325582941	0.00112746598352223
Cc02_g32290	GSCOC_T00012964001	A0A068VFA8	Putative unknown protein; Has 23 Blast hits to 23 proteins in 9 species			-1.95665542820334	0.00505808849654319
Cc01_g12820	GSCOC_T00028232001	A0A068UKH8	Fasciclin-like arabinogalactan protein 4	GO:0016021	AT3G46550	-1.95483205821382	0.00155059669506864
Cc02_g17840	GSCOC_T00014312001	A0A068TL71	PPPDE putative thiol peptidase family protein		AT4G17486	-1.95446195555793	0.00488597464755411
Cc07_g09060	GSCOC_T00040300001	A0A068U2T0	Geranylgeranyl pyrophosphate synthase, chloroplastic	GO:0016740;GO:0008299		-1.95388593053271	0.000674980857120053
Cc06_g17200	GSCOC_T00036351001	A0A068UWH9	Myb-related protein 306	GO:0005634;GO:0003677	AT1G08810	-1.95223493632092	6.04375584061673e-05
Cc11_g15820	GSCOC_T00038104001	A0A068UXW5	Hypothetical protein			-1.95139053842123	0.00234188569168612
Cc07_g15530	GSCOC_T00036464001	A0A068TYS6	Inositol-3-phosphate synthase	GO:0004512;GO:0006021;GO:0008654	AT5G10170	-1.94881525095732	4.18523653722537e-05
Cc02_g39110	GSCOC_T00027762001	A0A068UM96	Putative Dihydroflavonol-4-reductase	GO:0003824		-1.94776192343295	0.00146014495225389
Cc11_g14950	GSCOC_T00001038001	A0A068VE30	Peptidyl-prolyl cis-trans isomerase	GO:0009535;GO:0031977;GO:0003755	AT5G13410	-1.94171091713069	2.29168483665059e-06
Cc04_g16320	GSCOC_T00035718001	A0A068UUS7	NDH dependent flow 6	GO:0009535;GO:0010598;GO:0009773	AT1G18730	-1.94116912100871	0.0069110529577028
Cc01_g21350	GSCOC_T00004990001	A0A068VBL9	Putative RING/FYVE/PHD zinc finger superfamily protein	GO:0016021;GO:0008270		-1.9411440975616	0.000159518834788076
Cc03_g03590	GSCOC_T00026052001	A0A068TRV1	Photosystem I reaction center subunit II, chloroplastic	GO:0009538;GO:0015979	AT1G03130	-1.9401133823295	2.48548250269904e-05
Cc00_g03400	GSCOC_T00012866001	A0A068VED0	Protein SPIRAL1-like 1	GO:0043622	AT1G26355	-1.93911981969124	4.98355806953109e-06
Cc11_g04180	GSCOC_T00034056001	A0A068UTM9	Putative Cytosolic sulfotransferase 17	GO:0008146		-1.93353813437893	0.000406069252988354
Cc09_g04450	GSCOC_T00017424001	A0A068U929	Coproporphyrinogen-III oxidase, chloroplastic	GO:0004109;GO:0006779	AT1G03475	-1.9303869986913	2.66780864054265e-08
Cc06_g02700	GSCOC_T00023529001	A0A068UEK0	Actin	GO:0005737;GO:0005856;GO:0005524	AT3G12110	-1.92863422792496	0.00227383465299754
Cc03_g04500	GSCOC_T00026171001	A0A068TSB1	Protein of unknown function (DUF506) _x0001_			-1.92861442906157	0.000919656187362764
Cc03_g07400	GSCOC_T00026590001	A0A068TT36	Tetratricopeptide repeat (TPR)-like superfamily protein			-1.92753582459988	0.00658095319512941
Cc10_g04620	GSCOC_T00034914001	A0A068TZF8	Probable serine/threonine-protein kinase At1g01540	GO:0016021;GO:0005524;GO:0004672	AT1G01540	-1.9253236323528	0.00681723502121603
Cc01_g17770	GSCOC_T00016283001	A0A068U6J7	Photosystem II reaction center PSB28 protein, chloroplastic	GO:0009654;GO:0015979		-1.92219233120114	0.00229590255841435
Cc04_g16770	GSCOC_T00035787001	A0A068UUV8	Probable methyltransferase PMT2	GO:0016021;GO:0008168		-1.91745860541764	0.00015061179139449
Cc07_g07600	GSCOC_T00040110001	A0A068U292	Hypothetical protein	GO:0016021		-1.91650598457301	0.00342676021944317
Cc06_g16310	GSCOC_T00030711001	A0A068UNT8	Putative Uncharacterized protein C4orf29 homolog			-1.91345016021376	0.0036062381287344
Cc02_g37270	GSCOC_T00028014001	A0A068UKQ4	ARM repeat superfamily protein			-1.9098832183665	0.00663105566649843
Cc10_g03020	GSCOC_T00024817001	A0A068UGX9	Protein of unknown function (DUF1195)	GO:0016021		-1.90980334623567	2.82763079714577e-05
Cc02_g07270	GSCOC_T00029965001	A0A068TV41	Protein DA1-related 2	GO:0046872	AT2G39830	-1.90781456701039	0.00051064598219656
Cc00_g08670	GSCOC_T00006865001	A0A068VFD5	unknown protein; FUNCTIONS IN		AT5G12900	-1.90742376237053	0.00300585434368428
Cc07_g05910	GSCOC_T00039878001	A0A068U1T8	Putative uncharacterized protein	GO:0005634;GO:0004861;GO:0007050	AT1G49620	-1.90563735166002	5.69891081422357e-05
Cc11_g16310	GSCOC_T00038167001	A0A068UXN3	Probable LRR receptor-like serine/threonine-protein kinase At1g67720	GO:0016021;GO:0005524;GO:0004672	AT1G67720	-1.90420032899042	0.00281131999650441
Cc02_g16100	GSCOC_T00014085001	A0A068TL13	Integrin-linked protein kinase family	GO:0005524;GO:0004672	AT2G43850	-1.90280861717524	1.21938719261371e-06
Cc03_g05780	GSCOC_T00026346001	Q6P9B6	Fibrillin 4		AT3G23400	-1.90105213093479	7.6235194521477e-12
Cc02_g09280	GSCOC_T00029677001	A0A068TVE1	unknown protein; FUNCTIONS IN			-1.89998729660273	3.4814195778445e-05
Cc06_g01320	GSCOC_T00023347001	A0A068UDA9	Phosphoinositide phospholipase C 2	GO:0004435;GO:0035556;GO:0016042	AT3G08510	-1.89496394393234	0.00231562249194632
Cc01_g01320	GSCOC_T00037928001	A0A068UZS0	Plastocyanin, chloroplastic	GO:0005507;GO:0009055		-1.89307518655118	0.00398671237286279
Cc09_g08680	GSCOC_T00020845001	A0A068UAT7	Putative UDP-glucose flavonoid 3-O-glucosyltransferase 3	GO:0008194		-1.89045358546557	0.00700570321835369
Cc03_g07780	GSCOC_T00026642001	A0A068TU04	Homeodomain-like superfamily protein	GO:0005634;GO:0003677		-1.88997008592134	0.00128483321965781
Cc05_g08090	GSCOC_T00016820001	A0A068V7M7	Putative Uncharacterized protein HI_0077			-1.88637489210161	0.000347811068121337
Cc04_g14360	GSCOC_T00004341001	A0A068VC54	Putative Receptor-like protein 12	GO:0016021		-1.88622803878464	0.00205070006592017
Cc08_g08910	GSCOC_T00017228001	A0A068V896	Putative BURP domain-containing protein 5		AT5G25610	-1.88499859919733	0.0033441611112408
Cc02_g28560	GSCOC_T00009442001	A0A068VDQ5	Protein of unknown function (DUF3411)		AT5G12470	-1.87775012747211	4.62062377005239e-06
Cc11_g16970	GSCOC_T00038251001	A0A068UY50	Putative Uncharacterized GPI-anchored protein At1g27950	GO:0016021	AT1G27950	-1.87618113013555	6.28190398750522e-09
Cc02_g04990	GSCOC_T00038996001	A0A068V1U7	Putative uncharacterized protein			-1.87615286985881	1.47570564375038e-06
Cc02_g39890	GSCOC_T00027645001	A0A068UJA7	3-ketoacyl-CoA synthase 1	GO:0016020;GO:0016747;GO:0006633	AT1G01120	-1.87348176972982	0.000114927709114328
Cc11_g16230	GSCOC_T00038159001	A0A068UYA5	Photosystem II core complex proteins psbY, chloroplastic	GO:0016021;GO:0009523;GO:0030145;GO:0015979	AT1G67740	-1.86854201728532	0.000516218798767029
Cc11_g14710	GSCOC_T00032021001	A0A068TXU7	Hypothetical protein			-1.86820903534362	0.000724201286233533
Cc00_g02260	GSCOC_T00007929001	A0A068V9P6	Heparanase-like protein 2	GO:0016020;GO:0016798		-1.86630822931647	0.000788722416705127
Cc10_g03510	GSCOC_T00024877001	A0A068UGH2	30S ribosomal protein S9, chloroplastic (Fragment)	GO:0005840;GO:0003735;GO:0006412	AT1G74970	-1.86592210142894	0.000509684167374418
Cc08_g03960	GSCOC_T00034196001	A0A068UU27	Phosphoribulokinase, chloroplastic	GO:0005524;GO:0008974;GO:0005975	AT1G32060	-1.86127297890831	1.3987032702732e-08
Cc02_g38420	GSCOC_T00027865001	A0A068UKF7	Probable serine/threonine-protein kinase At1g01540	GO:0016021;GO:0005524;GO:0004672		-1.86077402276747	0.00557960081787049
Cc11_g16530	GSCOC_T00038193001	A0A068UYC9	Ankyrin repeat family protein			-1.85929602729538	3.22357738637924e-08
Cc08_g00130	GSCOC_T00005568001	A0A068VGI3	Probable receptor-like protein kinase At1g80640	GO:0016021;GO:0005524;GO:0004674	AT1G80640	-1.85851368382121	0.000117732107082485
Cc07_g05350	GSCOC_T00039805001	A0A068U1L2	Oxygen-evolving enhancer protein 1, chloroplastic	GO:0009654;GO:0010242;GO:0010207;GO:0042549	AT3G50820	-1.85832489044309	4.15996199762693e-06
Cc09_g06910	GSCOC_T00003645001	A0A068VK49	L-type lectin-domain containing receptor kinase IV.1	GO:0016021;GO:0005524;GO:0030246;GO:0004672	AT2G37710	-1.85810969506065	0.00249880585326449
Cc04_g00370	GSCOC_T00021642001	A0A068TNH5	proton gradient regulation 7	GO:0009570;GO:0009534;GO:0043495;GO:0009767;GO:0070455;GO:0009791;GO:0033014	AT3G21200	-1.8547223360427	3.00596270734223e-05
Cc06_g21650	GSCOC_T00015553001	A0A068V4P8	Protein of unknown function (DUF630 and DUF632)			-1.85269370971781	0.00131820672212871
Cc00_g15850	GSCOC_T00001708001	A0A068VH68	Calreticulin-3	GO:0005788;GO:0005509;GO:0051082;GO:0006457	AT1G08450	-1.84829466731881	0.000140825558586618
Cc04_g11870	GSCOC_T00037398001	A0A068UWZ4	Tryptophan aminotransferase-related protein 2	GO:0016846		-1.84661771396576	0.00673692284979452
Cc11_g11500	GSCOC_T00032436001	A0A068TX11	Hypothetical protein			-1.84373103586922	0.00493813615206666
Cc11_g05850	GSCOC_T00020557001	A0A068UB30	Putative hydroxyproline-rich glycoprotein family protein			-1.8384366067104	0.000156738469710846
Cc00_g03480	GSCOC_T00003113001	A0A068VBF8	Putative unknown protein; BEST Arabidopsis thaliana protein match is	GO:0051513		-1.83815765071945	0.00382381965915144
Cc08_g13580	GSCOC_T00030326001	A0A068UN24	Probable sugar phosphate/phosphate translocator At1g12500	GO:0016021	AT1G12500	-1.83508209449961	0.00509132528982812
Cc06_g12990	GSCOC_T00041464001	A0A068U4C1	Putative hydroxyproline-rich glycoprotein family protein			-1.83420699198362	0.00636353823842495
Cc01_g17810	GSCOC_T00016279001	A0A068U5G9	Putative Tetratricopeptide repeat (TPR)-like superfamily protein	GO:0006396		-1.83027278514593	1.95140879458383e-05
Cc07_g10820	GSCOC_T00037068001	A0A068U0N7	Ferredoxin--NADP reductase, leaf-type isozyme, chloroplastic	GO:0009507;GO:0004324	AT1G20020	-1.82987149259011	4.18800306779628e-05
Cc03_g02940	GSCOC_T00025967001	A0A068TRN4	Glutamine synthetase leaf isozyme, chloroplastic	GO:0048046;GO:0009941;GO:0009570;GO:0009535;GO:0022626;GO:0005739;GO:0005524;GO:0004356;GO:0006542;GO:0046686	AT5G35630	-1.82798167609313	2.83258708967042e-06
Cc07_g12980	GSCOC_T00036806001	A0A068TZN2	indeterminate(ID)-domain 14	GO:0009630	AT1G68130	-1.82597493480517	0.00143087053715931
Cc11_g11670	GSCOC_T00032416001	A0A068TWN0	Putative uncharacterized protein	GO:0016021		-1.82510292716749	0.00664198156132978
Cc02_g16950	GSCOC_T00014197001	A0A068TL79	Probable fructose-bisphosphate aldolase 2, chloroplastic	GO:0004332;GO:0006096	AT4G38970	-1.82481026297127	2.66913479952551e-05
Cc01_g08520	GSCOC_T00023878001	A0A068UEZ4	Putative Probable receptor protein kinase TMK1	GO:0016021;GO:0005524;GO:0004674		-1.82047501039607	0.00917266149518752
Cc03_g01080	GSCOC_T00025711001	A0A068TS62	Hypothetical protein			-1.81761609903414	0.000175910678291206
Cc02_g19080	GSCOC_T00014472001	A0A068TMR4	Protein of unknown function (DUF579)	GO:0045492		-1.80994753527248	7.73336478897178e-05
Cc01_g16620	GSCOC_T00016419001	A0A068U6U3	Putative ER lumen protein retaining receptor	GO:0005783;GO:0016021;GO:0046923;GO:0006621		-1.80947285697535	0.00915023816239738
Cc04_g05230	GSCOC_T00022270001	A0A068TQG5	Hydroxycinnamoyl-Coenzyme A shikimate/quinate hydroxycinnamoyltransferase	GO:0005829;GO:0016020;GO:0047205;GO:0047172;GO:0010252;GO:0009809;GO:0009963		-1.80764526691344	0.000350772319920464
Cc03_g01090	GSCOC_T00025712001	A0A068TR59	cAMP-regulated phosphoprotein 19-related protein			-1.80638196209709	0.000110668168879244
Cc00_g14310	GSCOC_T00011140001	A0A068VHC3	NADP-dependent D-sorbitol-6-phosphate dehydrogenase	GO:0016491	AT2G37770	-1.8060472317633	0.000456680409235298
Cc02_g06960	GSCOC_T00039252001	A0A068UZU5	Sedoheptulose-1,7-bisphosphatase, chloroplastic	GO:0048046;GO:0009941;GO:0009570;GO:0009579;GO:0050278;GO:0042742;GO:0019252;GO:0005986	AT3G55800	-1.804847715583	0.000178580875947028
Cc02_g37820	GSCOC_T00027940001	A0A068UKK6	AT hook motif DNA-binding family protein	GO:0005634;GO:0003680	AT2G45850	-1.79972987420187	0.00472819685898948
Cc02_g13570	GSCOC_T00029131001	A0A068TT91	30S ribosomal protein S5, chloroplastic	GO:0015935;GO:0003723;GO:0003735;GO:0006412	AT2G33800	-1.79735041003125	0.00297525233417828
Cc01_g13410	GSCOC_T00028307001	A0A068ULK0	Methylsterol monooxygenase 2-2	GO:0016021;GO:0005506;GO:0016491;GO:0008610	AT1G07420	-1.7948535247327	2.83258708967042e-06
Cc10_g07720	GSCOC_T00034486001	A0A068TYK1	Probable xyloglucan glycosyltransferase 12	GO:0016021;GO:0009506		-1.79480980337404	0.00349909357131953
Cc11_g10810	GSCOC_T00032527001	A0A068TYX0	Phosphoenolpyruvate carboxylase 4	GO:0008964;GO:0015977;GO:0006099	AT1G68750	-1.793328452568	0.000110421232878043
Cc08_g07790	GSCOC_T00011873001	A0A068VBC7	3-ketoacyl-CoA synthase 10	GO:0005783;GO:0016021;GO:0016747;GO:0006633;GO:0009409;GO:0080167;GO:0009416	AT2G26250	-1.79263918233155	0.000213025593325753
Cc07_g10550	GSCOC_T00037101001	A0A068U164	Putative Protein BASIC PENTACYSTEINE6		AT5G42520	-1.79025370927868	0.0063785550719635
Cc09_g07230	GSCOC_T00036293001	A0A068UWD8	Bifunctional dihydrofolate reductase-thymidylate synthase 2	GO:0004799;GO:0006231	AT4G34570	-1.78787767734745	0.00268564093114661
Cc06_g12070	GSCOC_T00041579001	A0A068U3K7	O-fucosyltransferase family protein	GO:0009507;GO:0005794;GO:0016021;GO:0016757;GO:0006004		-1.78737416137047	0.00791294713558765
Cc07_g07950	GSCOC_T00040157001	A0A068U2E4	Serine hydroxymethyltransferase, mitochondrial	GO:0016021;GO:0004372;GO:0030170;GO:0019264;GO:0035999	AT4G37930	-1.78603563406056	0.00359248849971586
Cc02_g13780	GSCOC_T00029098001	A0A068TU53	Predicted protein			-1.77806539211435	1.20939048708403e-05
Cc02_g05790	GSCOC_T00039098001	A0A068V224	Wound-induced protein 1			-1.77797543792967	0.00812263371108111
Cc07_g02540	GSCOC_T00039452001	A0A068U1W5	Putative Heavy metal transport/detoxification superfamily protein	GO:0046872;GO:0030001		-1.7743044835037	9.09243273253655e-05
Cc01_g07890	GSCOC_T00015467001	A0A068V465	Molybdopterin biosynthesis protein CNX1	GO:0005524;GO:0046872;GO:0061598;GO:0061599;GO:0006777;GO:0032324	AT5G20990	-1.7723305089103	0.000888824618251573
Cc10_g00360	GSCOC_T00024486001	A0A068UFN6	Peptidyl-prolyl cis-trans isomerase FKBP18, chloroplastic	GO:0003755		-1.77203101814324	0.00250980832015081
Cc07_g06010	GSCOC_T00039893001	A0A068U1U9	Zeaxanthin epoxidase, chloroplastic	GO:0009507;GO:0016021;GO:0071949;GO:0009540;GO:0009688	AT5G67030	-1.76799376281645	0.000146307637477651
Cc02_g01140	GSCOC_T00019923001	A0A068U8Y1	Putative Major facilitator superfamily domain-containing protein 5	GO:0016021;GO:0015098		-1.76721591313022	0.00878711269048336
Cc02_g35130	GSCOC_T00012343001	A0A068VMM3	PsbP domain-containing protein 1, chloroplastic	GO:0019898;GO:0009654;GO:0005509;GO:0015979	AT4G15510	-1.76577952832501	0.00608747482564068
Cc01_g16080	GSCOC_T00016483001	A0A068U8N0	Protein of unknown function, DUF538			-1.76212893485677	0.00415685708997442
Cc01_g21670	GSCOC_T00004952001	A0A068V8S4	unknown protein; FUNCTIONS IN	GO:0016021		-1.75954032961295	0.00986346500316516
Cc06_g12270	GSCOC_T00041557001	A0A068U3I7	Cation/calcium exchanger 4	GO:0016021;GO:0055085		-1.75821417313763	0.0018253879727208
Cc06_g18830	GSCOC_T00028912001	A0A068UMI5	Putative Uncharacterized protein At5g39865	GO:0009055;GO:0015035		-1.7571302660143	0.00558937810723695
Cc01_g19690	GSCOC_T00016026001	A0A068U5N6	Putative uncharacterized protein	GO:0046983	AT4G30980	-1.75584988864194	0.000536140505326817
Cc05_g11120	GSCOC_T00021356001	A0A068UCK4	Uroporphyrinogen decarboxylase 1, chloroplastic	GO:0009570;GO:0016021;GO:0004853;GO:0006782;GO:0046686		-1.75487168764077	0.00175031571865265
Cc01_g12770	GSCOC_T00028226001	A0A068UKH2	Actin-11	GO:0005737;GO:0005856;GO:0005524	AT3G12110	-1.754783675768	0.00187658952229321
Cc04_g04630	GSCOC_T00022193001	A0A068TQC1	adenylate cyclases	GO:0050355;GO:0048364		-1.75430475616708	0.00878711269048336
Cc04_g03820	GSCOC_T00022090001	A0A068TPC0	Putative Monoglyceride lipase	GO:0005783;GO:0005794;GO:0005886;GO:0009506;GO:0003846;GO:0090430;GO:0004622;GO:0046686;GO:0042542;GO:0010043		-1.7532563563439	0.00318498870641474
Cc02_g08740	GSCOC_T00029755001	A0A068TXB4	unknown protein; FUNCTIONS IN			-1.75262458314915	0.000762817633087735
Cc08_g07360	GSCOC_T00025360001	A0A068UHW0	Premnaspirodiene oxygenase	GO:0020037;GO:0005506;GO:0004497;GO:0016705		-1.7491164737449	1.13380762736399e-05
Cc10_g03950	GSCOC_T00034996001	A0A068TYP7	Protein of unknown function, DUF547			-1.74618999899976	0.00526508832285234
Cc01_g14040	GSCOC_T00028391001	A0A068ULM9	Tetratricopeptide repeat (TPR)-like superfamily protein			-1.74481573587977	0.00625686301026352
Cc02_g26730	GSCOC_T00024976001	A0A068UJ57	Putative Beta-hexosaminidase	GO:0004563;GO:0102148;GO:0005975		-1.74283283384656	0.00226815623942545
Cc05_g00060	GSCOC_T00017022001	A0A068V5H2	Scarecrow-like protein 23		AT5G41920	-1.74266392509789	0.0003896090180847
Cc09_g10170	GSCOC_T00041081001	A0A068V1N1	Glycerate dehydrogenase	GO:0051287;GO:0016616	AT1G68010	-1.73975506439778	4.25928512418775e-05
Cc02_g31060	GSCOC_T00011097001	A0A068VHD4	Photosystem II reaction center PsbP family protein	GO:0019898;GO:0016021;GO:0009654;GO:0005509;GO:0015979	AT3G05410	-1.73716249711342	0.00500562081151773
Cc08_g03370	GSCOC_T00010779001	A0A068VCG2	Homeobox-leucine zipper protein ROC3	GO:0005634;GO:0008289;GO:0043565;GO:0006355		-1.73645139206849	0.00788386833333235
Cc01_g14240	GSCOC_T00028420001	A0A068ULQ9	Putative RING/U-box superfamily protein	GO:0016021		-1.7360741022049	0.00206524142899495
Cc07_g09740	GSCOC_T00037203001	A0A068U0D5	Putative Uncharacterized hydrolase yugF	GO:0009941		-1.73356798234882	3.64510644951921e-05
Cc07_g07230	GSCOC_T00040063001	A0A068U4T5	Glycosyltransferase 6	GO:0016021;GO:0016757	AT4G37690	-1.73317256306211	0.00156335802699124
Cc00_g09980	GSCOC_T00006383001	A0A068VF57	alpha/beta-Hydrolases superfamily protein			-1.72993846325938	0.00353272574397499
Cc06_g01590	GSCOC_T00023382001	A0A068UFV3	Putative GDP-mannose-dependent alpha-mannosyltransferase			-1.72977176352656	1.67305170718554e-05
Cc01_g21760	GSCOC_T00004942001	A0A068V8Z6	Protoporphyrinogen oxidase, chloroplastic	GO:0009941;GO:0009534;GO:0016021;GO:0004729;GO:0006782		-1.72753016223614	0.000117462744373856
Cc11_g15490	GSCOC_T00038063001	A0A068V035	Alpha-glucan water dikinase, chloroplastic	GO:0009941;GO:0009570;GO:0005739;GO:0050521;GO:0005524;GO:0009631;GO:0009610;GO:0005983		-1.72744131559546	0.000298024800234208
Cc07_g01970	GSCOC_T00039376001	A0A068U1A9	Phosphoenolpyruvate/phosphate translocator 2, chloroplastic	GO:0016021;GO:0015121;GO:0071917	AT3G01550	-1.72392273765753	1.99684988389061e-05
Cc10_g10890	GSCOC_T00016633001	A0A068V5H3	Hypothetical protein			-1.72048600819514	0.00049850029166471
Cc02_g34520	GSCOC_T00000703001	A0A068V9N2	Probable protein phosphatase 2C 73	GO:0004722	AT5G27930	-1.71798871089249	0.00146925623634847
Cc07_g07240	GSCOC_T00040065001	A0A068U387	Glycosyltransferase 6	GO:0016021;GO:0016757		-1.71762611847748	0.00559351049815394
Cc06_g01460	GSCOC_T00023365001	A0A068UD55	Chlorophyll a-b binding protein CP29.2, chloroplastic	GO:0009535;GO:0016021;GO:0009522;GO:0009523;GO:0016168;GO:0009765;GO:0018298	AT3G08940	-1.71571287151988	0.00825542288344483
Cc10_g14380	GSCOC_T00012035001	A0A068VCN2	Putative UDP-glucuronate	GO:0005768;GO:0016021;GO:0005802;GO:0015020;GO:0009834;GO:0045492		-1.71107268907555	0.00114232242914544
Cc02_g33910	GSCOC_T00008637001	A0A068VBR4	Predicted protein (Fragment)	GO:0019898;GO:0009654;GO:0005509;GO:0015979	AT2G28605	-1.70587983250958	0.00754809996089068
Cc04_g05900	GSCOC_T00022362001	A0A068TQU2	Putative Lysosomal alpha-mannosidase	GO:0004559;GO:0030246;GO:0046872;GO:0006013	AT5G13980	-1.70228181286978	0.00143087053715931
Cc04_g01920	GSCOC_T00021856001	A0A068TNU6	Late embryogenesis abundant (LEA) hydroxyproline-rich glycoprotein family	GO:0016021;GO:0005886;GO:0009506		-1.70196059584598	0.00181518695182713
Cc02_g17540	GSCOC_T00014273001	A0A068TL46	Probable LRR receptor-like serine/threonine-protein kinase At2g16250	GO:0005524;GO:0004672		-1.70097889524508	0.00114652841690942
Cc05_g09930	GSCOC_T00021522001	A0A068UCB4	Chlorophyll a-b binding protein 8, chloroplastic	GO:0009535;GO:0016021;GO:0009522;GO:0009523;GO:0016168;GO:0009765;GO:0018298	AT1G61520	-1.7000395557219	0.00574166546889361
Cc01_g19350	GSCOC_T00016069001	A0A068U566	Plant protein of unknown function (DUF868)			-1.69962665510484	0.00476005442580371
Cc05_g12410	GSCOC_T00021194001	A0A068UE20	Putative COP1-interacting protein 7	GO:0005634;GO:0005886;GO:0009718;GO:0015995;GO:0045893;GO:0009416		-1.69885535372913	7.89314622466951e-08
Cc07_g04160	GSCOC_T00039668001	A0A068U1D1	Alpha-amylase isozyme 2A	GO:0004556;GO:0005509;GO:0005975	AT1G69830	-1.69835979651856	0.00533447743940049
Cc10_g01540	GSCOC_T00024627001	A0A068UGP7	Endoplasmin homolog	GO:0005524;GO:0051082;GO:0006457		-1.68819894036274	0.00859945518099221
Cc00_g32770	GSCOC_T00009826001	A0A068VMV1	Heterodimeric geranylgeranyl pyrophosphate synthase small subunit, chloroplastic	GO:0016740;GO:0008299	AT4G38460	-1.68709101491784	3.00741493190574e-06
Cc02_g13010	GSCOC_T00029211001	A0A068TTJ3	Putative Epoxide hydrolase 2	GO:0003824		-1.68699653637557	0.00776209821719095
Cc00_g19340	GSCOC_T00007623001	A0A068VIT7	Putative Ankyrin repeat family protein	GO:0016021		-1.68466075262359	0.00403612368151393
Cc10_g05850	GSCOC_T00034753001	A0A068TY93	Acetyl-CoA carboxylase 1	GO:0003989;GO:0005524;GO:0046872;GO:0006633		-1.68459522494804	0.00769109633265396
Cc09_g08040	GSCOC_T00003802001	A0A068V9X7	Homeobox-leucine zipper protein HOX32	GO:0005634;GO:0003677;GO:0008289	AT2G34710	-1.68267812988556	0.00570931622801664
Cc02_g21170	GSCOC_T00014754001	A0A068TPW6	2-oxoglutarate/malate translocator, chloroplastic	GO:0016021;GO:0022857		-1.67662411121398	0.00599848610459407
Cc00_g20120	GSCOC_T00001107001	A0A068VJ62	AAA-ATPase 1	GO:0016021;GO:0005524		-1.67651920214989	0.00632511159758245
Cc07_g10450	GSCOC_T00037115001	A0A068U175	Probable fructose-bisphosphate aldolase 2, chloroplastic	GO:0004332;GO:0006096	AT4G38970	-1.67500720277839	0.00301372466443093
Cc06_g03850	GSCOC_T00023681001	A0A068UEY5	RING/U-box superfamily protein	GO:0016021;GO:0008270		-1.67354507273673	0.000108831078474146
Cc02_g05260	GSCOC_T00039029001	A0A068UZC8	Rhodanese-like domain-containing protein 7		AT2G40760	-1.67150960186749	0.00751786624460075
Cc05_g03390	GSCOC_T00033551001	A0A068UUP9	Hypothetical protein			-1.6687132485164	7.4877533182654e-05
Cc07_g06040	GSCOC_T00039896001	A0A068U2V9	Putative alpha/beta-Hydrolases superfamily protein	GO:0016021;GO:0006629		-1.66792351651151	1.06195521542406e-07
Cc02_g02820	GSCOC_T00020150001	A0A068UC58	Pectinacetylesterase family protein	GO:0005618;GO:0005576;GO:0016787;GO:0071555	AT5G23870	-1.66726196119644	0.00622041595367098
Cc04_g08210	GSCOC_T00022675001	A0A068TQD5	Putative DUF246 domain-containing protein At1g04910	GO:0016757;GO:0006004		-1.65932961766981	0.00485858659434827
Cc02_g35200	GSCOC_T00042887001	A0A068V3W6	haloacid dehalogenase-like hydrolase family protein	GO:0016787		-1.65610392623142	0.00795443900434952
Cc02_g00440	GSCOC_T00019824001	A0A068U8S0	rubredoxin family protein	GO:0016021		-1.65532694376112	0.00140602782920843
Cc00_g27350	GSCOC_T00012547001	A0A068VLC2	Elongation factor Tu, chloroplastic	GO:0005525;GO:0003924;GO:0003746		-1.65444719867729	1.33477180058651e-06
Cc01_g13980	GSCOC_T00028383001	A0A068UL45	Hypothetical protein			-1.65271891391109	0.00485270332118181
Cc02_g15390	GSCOC_T00013985001	A0A068TKL5	Shaggy-related protein kinase eta	GO:0005938;GO:0005634;GO:0005886;GO:0005524;GO:0042802;GO:0004674;GO:0009742;GO:0009729;GO:0009965;GO:0009825;GO:1900458;GO:0046827;GO:0046777;GO:0009733;GO:0048765	AT4G18710	-1.65067224692102	0.00247286429584016
Cc04_g05090	GSCOC_T00022254001	A0A068TSC5	Putative DNA-3-methyladenine glycosylase 1	GO:0008725;GO:0006284		-1.65012493670019	0.000129568020537432
Cc01_g12120	GSCOC_T00028134001	A0A068UKA8	Ankyrin repeat-containing protein At5g02620	GO:0016021		-1.64983100979234	0.00371810246166222
Cc10_g09110	GSCOC_T00034295001	A0A068TX43	Rieske (2Fe-2S) domain-containing protein	GO:0051537;GO:0008942		-1.64857759803438	0.0030789054367901
Cc04_g09720	GSCOC_T00000093001	A0A068VID2	Thylakoid lumenal 17.9 kDa protein, chloroplastic	GO:0009507;GO:0031977	AT4G24930	-1.64630724045809	0.00408188015079704
Cc01_g09010	GSCOC_T00023942001	A0A068UEJ2	Rho GTPase activating protein with PAK-box/P21-Rho-binding domain	GO:0007165	AT5G22400	-1.64498002271383	0.00127782943204218
Cc00_g08720	GSCOC_T00004593001	A0A068VFF0	NADPH	GO:0016491		-1.64473277454067	0.00519823261891775
Cc01_g07770	GSCOC_T00015452001	A0A068V6M7	Core-2/I-branching beta-1,6-N-acetylglucosaminyltransferase family protein	GO:0016021		-1.64342834796706	0.000557720854648084
Cc07_g15850	GSCOC_T00036418001	A0A068TZL6	Putative Gamma-glutamyltranspeptidase 1	GO:0036374;GO:0006751	AT4G39640	-1.63774707595833	0.0023096610608286
Cc05_g10170	GSCOC_T00021493001	A0A068UCW9	Peroxisomal (S)-2-hydroxy-acid oxidase	GO:0010181;GO:0016491	AT3G14420	-1.63753475626912	5.22772107255727e-05
Cc01_g11560	GSCOC_T00028058001	A0A068UKZ9	alpha/beta-Hydrolases superfamily protein			-1.63659745912822	0.00726153481194358
Cc01_g05880	GSCOC_T00027415001	A0A068UIV7	Putative Uncharacterized protein At2g37660, chloroplastic			-1.63408996499295	0.00053793079386752
Cc01_g04510	GSCOC_T00041173001	A0A068V1E3	alpha/beta-Hydrolases superfamily protein	GO:0006629		-1.63339613365434	0.00167328678329944
Cc05_g06750	GSCOC_T00042185001	A0A068V4H3	Thylakoid lumenal protein At1g03610, chloroplastic	GO:0009543;GO:0009535;GO:0071484;GO:0010207;GO:0010206	AT1G03600	-1.63266751038092	0.00348946970156612
Cc01_g03170	GSCOC_T00033154001	A0A068US88	Probable plastid-lipid-associated protein 12, chloroplastic	GO:0009941;GO:0009535	AT1G51110	-1.6323419084012	0.00221865831669154
Cc04_g04580	GSCOC_T00022187001	A0A068TQB7	Tetratricopeptide repeat (TPR)-like superfamily protein			-1.63092423907466	0.00755881207668446
Cc08_g08350	GSCOC_T00007231001	A0A068VCY5	Serine/threonine protein phosphatase 2A 57 kDa regulatory subunit B' iota isoform	GO:0005737;GO:0000159;GO:0019888;GO:0007165	AT5G25510	-1.62869228628961	0.00801889492973102
Cc04_g00620	GSCOC_T00021682001	A0A068TNJ4	O-fucosyltransferase family protein	GO:0016757;GO:0006004		-1.62777135790417	0.00204807507093724
Cc10_g00750	GSCOC_T00024533001	A0A068UFH2	Alcohol dehydrogenase-like 7	GO:0016491;GO:0008270		-1.62634655230007	0.000436558502520007
Cc05_g06850	GSCOC_T00042200001	A0A068V4H9	Protochlorophyllide reductase, chloroplastic	GO:0009507;GO:0016630;GO:0015995;GO:0015979	AT1G03630	-1.62609379730119	0.00272145010870701
Cc08_g03490	GSCOC_T00034129001	A0A068UTT5	Glycerol-3-phosphate acyltransferase, chloroplastic	GO:0009570;GO:0004366;GO:0102420;GO:0016024;GO:0006655	AT1G32200	-1.62574328785597	0.00034876439956689
Cc01_g13210	GSCOC_T00028284001	A0A068ULH8	BAG family molecular chaperone regulator 1	GO:0051087		-1.62483404563024	3.2548906520289e-05
Cc05_g10400	GSCOC_T00021451001	A0A068UD19	Putative Heme-binding protein 2			-1.62144729805868	0.000104614678748818
Cc07_g07940	GSCOC_T00040156001	A0A068U3I4	Serine hydroxymethyltransferase 1, mitochondrial	GO:0004372;GO:0030170;GO:0019264;GO:0035999	AT4G37930	-1.61747018200054	0.000951084740440156
Cc10_g02950	GSCOC_T00024809001	A0A068UG24	Glucan endo-1,3-beta-glucosidase 7	GO:0004553;GO:0005975		-1.61557259020068	0.00754460536220226
Cc02_g38740	GSCOC_T00027818001	A0A068UJP9	Protein ABIL1			-1.61500587026473	0.00749793536511639
Cc07_g03310	GSCOC_T00039558001	A0A068U163	Protease Do-like 8, chloroplastic	GO:0004252		-1.61341091696437	0.00297525233417828
Cc04_g04760	GSCOC_T00022211001	A0A068TPI8	Putative UPF0481 protein At3g02645	GO:0016021		-1.61256142748882	0.000345929601946297
Cc10_g10500	GSCOC_T00035985001	A0A068UV59	Phosphatidylinositol 4-phosphate 5-kinase 2	GO:0016308;GO:0005524		-1.60785501060276	0.00247939669238249
Cc01_g03210	GSCOC_T00033150001	A0A068URF2	Probable ribose-5-phosphate isomerase	GO:0009941;GO:0009570;GO:0009535;GO:0004751;GO:0042742;GO:0009052	AT3G04790	-1.60396745252257	0.00526737789259448
Cc05_g08440	GSCOC_T00016866001	A0A068V7Q5	Phospholipase A1-IIdelta	GO:0008970;GO:0006629	AT2G42690	-1.60229688188186	0.000351807782641222
Cc07_g17730	GSCOC_T00018859001	A0A068U9A9	Putative G-type lectin S-receptor-like serine/threonine-protein kinase RLK1	GO:0005524;GO:0004674;GO:0048544		-1.60156950461612	0.00164150100705316
Cc07_g05370	GSCOC_T00039808001	A0A068U276	BTB/POZ domain-containing protein At5g66560		AT5G66560	-1.59305529081913	3.09780370388736e-05
Cc02_g24060	GSCOC_T00015118001	A0A068TNZ0	Transketolase, chloroplastic	GO:0004802		-1.58126470339321	1.26434317171005e-07
Cc05_g03640	GSCOC_T00017361001	A0A068V669	Putative uncharacterized protein			-1.57683989136134	0.000107108864324909
Cc07_g04560	GSCOC_T00039712001	A0A068U1G4	O-fucosyltransferase family protein	GO:0005768;GO:0016021;GO:0005802;GO:0016757;GO:0006004	AT3G30300	-1.57424443661002	0.00849377458459485
Cc01_g15420	GSCOC_T00016562001	A0A068U775	Probable LRR receptor-like serine/threonine-protein kinase At1g06840	GO:0016021;GO:0005524;GO:0004674	AT1G06840	-1.56407073813799	0.00681067018160342
Cc07_g02170	GSCOC_T00039400001	A0A068U1D6	Protease Do-like 1, chloroplastic	GO:0009535;GO:0005634;GO:0031977;GO:0042802;GO:0004252;GO:0010206	AT3G27925	-1.56263428563009	0.000198668439267154
Cc01_g15140	GSCOC_T00016599001	A0A068U6X9	unknown protein; FUNCTIONS IN			-1.5623887136948	0.0047213898764924
Cc03_g10530	GSCOC_T00031072001	A0A068URW9	Putative UDP-glycosyltransferase 92A1	GO:0008194		-1.5599858551958	0.00476005442580371
Cc01_g20890	GSCOC_T00005047001	A0A068V9E0	Blue-light photoreceptor PHR2			-1.55816285300529	1.00445506567451e-05
Cc10_g00440	GSCOC_T00024494001	A0A068UGF9	Glutamate receptor 3.3	GO:0016021;GO:0005262;GO:0008066;GO:0015276;GO:0007267;GO:0071230;GO:0050832;GO:0009630;GO:0009864;GO:0009611		-1.55748803342542	4.84607202752684e-05
Cc02_g32670	GSCOC_T00001209001	A0A068VBL3	UPF0603 protein At1g54780, chloroplastic	GO:0009535;GO:0016021;GO:0031977;GO:0003993;GO:0010206	AT1G54780	-1.55396283017441	0.000298024800234208
Cc07_g19340	GSCOC_T00018599001	A0A068UAF6	NAD-dependent protein deacetylase SRT2	GO:0070403		-1.55219517702276	0.00897186516999287
Cc04_g05480	GSCOC_T00022302001	A0A068TQI1	Predicted protein			-1.55065237566768	0.00201755817556598
Cc10_g04440	GSCOC_T00034934001	A0A068TZ51	Putative Patatin group A-3	GO:0016787;GO:0016042	AT2G26560	-1.54673813858883	0.00322462529717233
Cc05_g00320	GSCOC_T00017059001	A0A068V5W6	Mannose-1-phosphate guanylyltransferase 1	GO:0016779;GO:0009058		-1.54535695119711	0.00705360266706635
Cc10_g06080	GSCOC_T00034712001	A0A068U0N9	ATP synthase delta chain, chloroplastic	GO:0009941;GO:0009535;GO:0010287;GO:0010319;GO:0046933;GO:0015986;GO:0042742;GO:0009773;GO:0009772;GO:0009409	AT4G09650	-1.54198210223567	0.000515284485147134
Cc03_g01930	GSCOC_T00025824001	A0A068TSC3	Xyloglucan 6-xylosyltransferase	GO:0016021;GO:0016757		-1.54145377617307	3.44979870445399e-05
Cc09_g01760	GSCOC_T00017767001	A0A068U7W1	Uncharacterized GPI-anchored protein At1g61900	GO:0005886;GO:0009506	AT1G61900	-1.54068750736206	0.000122010895380012
Cc04_g10650	GSCOC_T00042628001	A0A068V3D1	Putative Protein CbbY	GO:0016787		-1.53845985680792	0.000663787751191719
Cc04_g09880	GSCOC_T00042519001	A0A068V2G3	Putative Heavy metal transport/detoxification superfamily protein	GO:0046872;GO:0030001	AT5G63530	-1.536028405286	0.0049546994730407
Cc06_g09180	GSCOC_T00041948001	A0A068U4A5	Putative Uncharacterized sodium-dependent transporter yocS	GO:0016021	AT2G26900	-1.53317617670112	0.0057125610799419
Cc00_g18980	GSCOC_T00003157001	A0A068VIG3	Putative Probable receptor-like protein kinase At5g39020	GO:0005524;GO:0004674	AT5G38280	-1.52737010560668	0.00418948281868487
Cc09_g04090	GSCOC_T00017468001	A0A068U7K6	Putative Phosphoglycolate phosphatase	GO:0016791		-1.52728064096751	0.000588893271784539
Cc08_g04460	GSCOC_T00015628001	A0A068V702	50S ribosomal protein L9, chloroplastic	GO:0005840;GO:0003735;GO:0006412		-1.52524850078771	0.00696532885525144
Cc01_g09510	GSCOC_T00024005001	A0A068UEM8	Putative Uncharacterized oxidoreductase At1g06690, chloroplastic			-1.5244498570819	0.000699639748631544
Cc02_g35060	GSCOC_T00011820001	A0A068VCJ5	Uncharacterized protein			-1.51905085982653	0.0028678905646421
Cc11_g09040	GSCOC_T00032795001	A0A068TWS8	unknown protein; FUNCTIONS IN	GO:0016021		-1.51523731575915	0.00405257244054105
Cc02_g01260	GSCOC_T00019942001	A0A068U9Q1	Thylakoid lumenal 17.4 kDa protein, chloroplastic			-1.51076988596089	0.0069766012896127
Cc04_g05620	GSCOC_T00022322001	A0A068TPX5	Putative Glutamyl-tRNA(Gln) amidotransferase subunit A	GO:0016787		-1.50876159435122	0.00359768186102868
Cc00_g16790	GSCOC_T00009176001	A0A068VI32	Putative Thioredoxin	GO:0009570;GO:0008047		-1.50736921973435	0.00504783627502993
Cc07_g06590	GSCOC_T00039974001	A0A068U315	Putative Xyloglucan galactosyltransferase KATAMARI1 homolog	GO:0016757;GO:0006486		-1.50698467640574	0.00308950965185741
Cc11_g16910	GSCOC_T00038243001	A0A068UXS4	Chlorophyll a-b binding protein, chloroplastic	GO:0009535;GO:0016021;GO:0009522;GO:0009523;GO:0016168;GO:0009765;GO:0018298	AT3G61470	-1.50203614578634	0.00276558081140317
Cc05_g05260	GSCOC_T00035089001	A0A068UW35	Putative pterin-4-alpha-carbinolamine dehydratase	GO:0008124;GO:0006729	AT5G51110	-1.49889627990045	0.00134817707412567
Cc01_g15700	GSCOC_T00016532001	Q98IV5	MLO-like protein 1	GO:0016021;GO:0005886;GO:0005516;GO:0006952;GO:0009607	AT4G02600	-1.49841491703268	0.00612884521934475
Cc01_g17500	GSCOC_T00016317001	A0A068U5R5	Photosystem I reaction center subunit IV A, chloroplastic	GO:0009538;GO:0015979	AT2G20260	-1.49515106938952	0.00260760315737895
Cc09_g10800	GSCOC_T00041000001	A0A068V3M9	EXORDIUM like 5		AT2G17230	-1.49424239395325	0.00189364630705452
Cc01_g15620	GSCOC_T00016541001	A0A068U752	Protein of unknown function (DUF607)	GO:0016021;GO:0005743;GO:0005262;GO:0015292;GO:0051560		-1.49069442448804	0.00302120295359233
Cc00_g12510	GSCOC_T00010996001	A0A068VJD6	30S ribosomal protein S13, chloroplastic	GO:0005840;GO:0003723;GO:0003735;GO:0006412		-1.48952002055351	0.00919497068007057
Cc07_g00870	GSCOC_T00019168001	A0A068V8A7	50S ribosomal protein L27, chloroplastic	GO:0005840;GO:0003735;GO:0006412	AT5G40950	-1.4784751228091	0.00149280118780915
Cc04_g07800	GSCOC_T00022617001	A0A068TRC1	Calcium sensing receptor, chloroplastic	GO:0009535;GO:0005739;GO:0071277;GO:0009704;GO:0090333	AT5G23060	-1.47024791433413	0.00233576228921803
Cc10_g01120	GSCOC_T00024578001	A0A068UGD4	Thioredoxin-like protein CDSP32, chloroplastic	GO:0009941;GO:0009570;GO:0045454	AT1G76080	-1.46911001070408	0.000398629405958769
Cc02_g39680	GSCOC_T00027682001	A0A068UJK9	Calcium-binding protein KIC	GO:0005509	AT2G46600	-1.46705718643747	0.0026468030130302
Cc08_g09580	GSCOC_T00026899001	A0A068UIR4	Protein of unknown function (DUF810)			-1.46370546615275	0.000241129907395105
Cc04_g02750	GSCOC_T00021953001	A0A068TPY5	RuBisCO large subunit-binding protein subunit beta, chloroplastic	GO:0005524;GO:0042026		-1.44446256045774	0.00256426292285207
Cc01_g17190	GSCOC_T00016354001	A0A068U6C1	Putative unknown protein; FUNCTIONS IN			-1.4432189532416	0.00233576228921803
Cc01_g12910	GSCOC_T00028243001	A0A068ULE2	Triosephosphate isomerase, cytosolic	GO:0004807;GO:0006096	AT3G55440	-1.43556453896747	0.00408188015079704
Cc02_g24930	GSCOC_T00028822001	A0A068ULM7	Putative dual specificity protein phosphatase DSP8	GO:0004725;GO:0008138		-1.43490897531701	0.00954789008433364
Cc05_g14870	GSCOC_T00038767001	A0A068UZS5	unknown protein; FUNCTIONS IN	GO:0016021		-1.43162506656296	0.000353222859782089
Cc02_g35140	GSCOC_T00012344001	A0A068VK15	Chloroplast stem-loop binding protein of 41 kDa b, chloroplastic	GO:0003824	AT1G09340	-1.43129309913308	0.000262489728603594
Cc06_g05700	GSCOC_T00043134001	A0A068V695	Cell division protein FtsZ homolog 2-2, chloroplastic	GO:0005525;GO:0003924	AT3G52750	-1.43082704602251	0.00206936771812796
Cc05_g09570	GSCOC_T00021566001	A0A068UD39	Hypothetical protein	GO:0016021		-1.430403746152	0.00417555948072483
Cc03_g08400	GSCOC_T00033256001	A0A068USH9	DNAJ-like 20		AT4G13830	-1.42846680172707	0.000138923309182477
Cc06_g19310	GSCOC_T00028988001	A0A068ULZ1	Putative Predicted protein	GO:0051091		-1.42766524564142	0.0044397552847951
Cc10_g10340	GSCOC_T00031426001	A0A068UQE8	BAG family molecular chaperone regulator 1	GO:0051087		-1.42376425554455	0.000553671271258002
Cc04_g16020	GSCOC_T00042392001	A0A068V283	Dynein light chain LC6, flagellar outer arm	GO:0030286;GO:0007017		-1.42031844558808	0.000951084740440156
Cc01_g17450	GSCOC_T00016323001	A0A068U5R9	CLIP-associated protein			-1.41950938096551	0.000937943593856304
Cc01_g13960	GSCOC_T00028381001	A0A068ULQ8	Putative Ribosomal protein L4/L1e	GO:0009570;GO:0009535;GO:0022626;GO:0005634;GO:0008266;GO:0003735;GO:0006412		-1.41867348415001	0.000291788211274875
Cc05_g06070	GSCOC_T00035214001	A0A068UUG6	Protein THYLAKOID FORMATION1, chloroplastic	GO:0010207	AT2G20890	-1.41358878952195	0.000387804285269443
Cc03_g07380	GSCOC_T00026588001	A0A068TTW5	Protein kinase superfamily protein	GO:0005524;GO:0004672		-1.40862317086301	0.00146902834460959
Cc00_g20750	GSCOC_T00001383001	A0A068VM15	Phenylalanine ammonia-lyase	GO:0005737;GO:0045548;GO:0009800;GO:0006559		-1.40299283022766	0.00549361449864194
Cc06_g14880	GSCOC_T00030907001	A0A068UPU0	APO protein 2, chloroplastic	GO:0003723		-1.40007207783054	0.00347752837428975
Cc07_g12330	GSCOC_T00036888001	A0A068TZT3	unknown protein; FUNCTIONS IN	GO:0016021		-1.39630357262703	0.0084219612844135
Cc07_g03760	GSCOC_T00039621001	A0A068U199	Chorismate mutase, chloroplastic	GO:0004106;GO:0009073;GO:0046417		-1.39616553802351	0.0017717748308744
Cc04_g15130	GSCOC_T00002596001	A0A068VFP2	Ribulose-phosphate 3-epimerase, chloroplastic (Fragment)	GO:0048046;GO:0009941;GO:0009570;GO:0010319;GO:0009579;GO:0016857;GO:0005975;GO:0009409;GO:0009624		-1.39484383834637	0.000703766459209459
Cc02_g22710	GSCOC_T00014948001	A0A068TNI0	Potassium channel AKT2/3	GO:0016021;GO:0005249;GO:0034765	AT4G22200	-1.39312039160919	0.000786138922241005
Cc07_g04350	GSCOC_T00039691001	A0A068U1C0	Protein SPIRAL1-like 2	GO:0043622		-1.39112855465474	0.00634247200188718
Cc06_g07400	GSCOC_T00031265001	A0A068UQ04	Putative Peptidyl-prolyl cis-trans isomerase B	GO:0009507;GO:0031977;GO:0003755		-1.39090607650875	0.00411996706269305
Cc01_g02770	GSCOC_T00013211001	A0A068VA65	Formate--tetrahydrofolate ligase	GO:0005524;GO:0004329		-1.39044688836243	0.00106105288357352
Cc02_g31610	GSCOC_T00027522001	A0A068UJ25	unknown protein; FUNCTIONS IN			-1.38736112991636	3.67472831497092e-05
Cc06_g15540	GSCOC_T00030806001	A0A068URH8	P-loop containing nucleoside triphosphate hydrolases superfamily protein	GO:0005524;GO:0008017;GO:0003777;GO:0007018		-1.38682688366617	0.00131702550956198
Cc10_g16240	GSCOC_T00033841001	A0A068USL6	RmlC-like cupins superfamily protein	GO:0009507		-1.38390688472678	0.0099914338865921
Cc01_g18770	GSCOC_T00016157001	A0A068U6D1	Magnesium transporter MRS2-I	GO:0016021;GO:0006811	AT5G64560	-1.38237884950841	0.0026648641389598
Cc05_g04410	GSCOC_T00031666001	A0A068UQI3	Probable beta-1,3-galactosyltransferase 2	GO:0000139;GO:0016021;GO:0016757;GO:0006486		-1.37469052735215	0.00622041595367098
Cc06_g23350	GSCOC_T00040585001	A0A068V159	Putative Dihydrosphingosine 1-phosphate phosphatase C823.11	GO:0005789;GO:0016021;GO:0009737;GO:0006665;GO:0090332		-1.37400978825621	0.00251355486857453
Cc02_g13860	GSCOC_T00029087001	A0A068TTA4	Triose phosphate/phosphate translocator, chloroplastic	GO:0016021;GO:0022857	AT1G61800	-1.37146096836656	0.000406836335324533
Cc07_g06580	GSCOC_T00039973001	A0A068U4L4	TRICHOME BIREFRINGENCE-LIKE 19	GO:0016021		-1.37041574192763	0.00646790043601684
Cc04_g01810	GSCOC_T00021842001	A0A068TNI7	Putative oxidoreductase GLYR1	GO:0051287;GO:0050661;GO:0016491		-1.36027557250419	0.00699868849986245
Cc10_g02970	GSCOC_T00024812001	A0A068UGX4	Glucose-6-phosphate isomerase, cytosolic 1	GO:0004347;GO:0006094;GO:0006096		-1.35698688758785	0.000444970112243394
Cc11_g12060	GSCOC_T00032365001	A0A068TYJ5	alpha/beta-Hydrolases superfamily protein	GO:0003824		-1.35681678297206	0.000783916940994597
Cc02_g30400	GSCOC_T00023753001	A0A068UE12	Restriction endonuclease, type II-like superfamily protein			-1.35514047649336	0.00369430264474245
Cc02_g16530	GSCOC_T00014146001	A0A068TLY0	Triosephosphate isomerase, chloroplastic	GO:0004807	AT2G21170	-1.35441009406818	0.000261194927425054
Cc11_g08660	GSCOC_T00032843001	A0A068TZJ0	Putative ATP-dependent DNA helicase recG	GO:0005524;GO:0003678;GO:0003676;GO:0006310;GO:0006281		-1.35424368827201	0.00189364630705452
Cc00_g26810	GSCOC_T00008668001	A0A068VL71	Putative Adipocyte plasma membrane-associated protein	GO:0016844;GO:0009058		-1.35265258184162	0.00591931014063163
Cc07_g09780	GSCOC_T00037198001	A0A068U0F6	Soluble inorganic pyrophosphatase	GO:0005737;GO:0004427;GO:0000287;GO:0006796	AT3G53620	-1.35241875504219	0.00919497068007057
Cc10_g09190	GSCOC_T00034281001	A0A068TXR5	Thioredoxin family protein	GO:0009507		-1.35171571210168	0.00189364630705452
Cc08_g15950	GSCOC_T00035541001	A0A068UUC8	Probable polygalacturonase	GO:0005576;GO:0004650;GO:0005975;GO:0071555		-1.3455768682433	0.00559351049815394
Cc03_g07100	GSCOC_T00026547001	A0A068TT12	GDT1-like protein 2, chloroplastic	GO:0009706;GO:0016021;GO:0005384	AT4G13590	-1.33890920601265	0.00307713058088823
Cc03_g00020	GSCOC_T00025573001	A0A068TTQ0	Aspartic proteinase oryzasin-1	GO:0004190;GO:0006629	AT1G11910	-1.33404151711939	0.000672991279515291
Cc02_g11760	GSCOC_T00029374001	A0A068TU09	Thioredoxin-like protein CXXS1	GO:0005829;GO:0003756	AT1G11530	-1.33333753507463	0.000440958587941208
Cc08_g16830	GSCOC_T00035658001	A0A068UXA2	unknown protein; BEST Arabidopsis thaliana protein match is		AT1G03055	-1.32997625183707	0.00964533659114954
Cc02_g39740	GSCOC_T00027675001	A0A068UJC3	unknown protein; FUNCTIONS IN	GO:0016021		-1.32965868631187	0.00244328032324304
Cc10_g13610	GSCOC_T00035262001	A0A068UTR8	Putative Probable calcium-binding protein CML44	GO:0005509	AT1G21550	-1.32939391143392	0.000919656187362764
Cc02_g34560	GSCOC_T00000713001	A0A068V9D7	Probable protein phosphatase 2C 5	GO:0004722	AT1G09160	-1.32766286965446	0.00878597092345607
Cc08_g09250	GSCOC_T00017270001	A0A068V6Q4	Phosphorylase superfamily protein	GO:0003824;GO:0009116		-1.32397514026827	0.00276855329583442
Cc02_g05540	GSCOC_T00039065001	A0A068V201	Phosphoglucan phosphatase LSF2, chloroplastic	GO:0008138	AT3G10940	-1.31918344907038	0.000399817044649904
Cc03_g02350	GSCOC_T00025877001	A0A068TRN9	NAD(P)-binding Rossmann-fold superfamily protein			-1.31889372115596	0.000904867695007185
Cc05_g14100	GSCOC_T00038861001	A0A068UZG4	Putative Predicted protein	GO:0016757		-1.30832947663419	0.0096833739866227
Cc04_g16450	GSCOC_T00035743001	A0A068UXE0	Putative Cytosolic sulfotransferase 5	GO:0008146	AT3G45070	-1.3053490744338	0.00436268329956963
Cc08_g09370	GSCOC_T00017291001	A0A068V6X1	Probable peptide transporter At1g52190	GO:0016021;GO:0022857	AT1G52190	-1.30403667659495	0.00348040907468252
Cc06_g17090	GSCOC_T00012652001	A0A068VHT4	Protein of unknown function (DUF288)	GO:0016021		-1.30386239862559	0.00263697254961816
Cc01_g06000	GSCOC_T00027432001	A0A068UJL8	Magnesium-chelatase subunit chlD, chloroplastic	GO:0009507;GO:0005524;GO:0016851;GO:0015995;GO:0015979		-1.30123489631232	0.000567981722716035
Cc07_g08070	GSCOC_T00040169001	A0A068U357	Probable fructokinase-4	GO:0016301;GO:0016773	AT1G66430	-1.30066182498152	0.00225450120117886
Cc07_g12320	GSCOC_T00036889001	A0A068U0C9	Diacylglycerol O-acyltransferase 2	GO:0016021;GO:0005384;GO:0016747;GO:0030026		-1.29367740267866	0.0024990886686358
Cc06_g00400	GSCOC_T00023216001	A0A068UDV6	Elongation factor P	GO:0009570;GO:0003746		-1.28970525872875	0.0034842225334916
Cc05_g14930	GSCOC_T00038757001	A0A068V1I4	Protein TIC 20-v, chloroplastic	GO:0031969;GO:0009535;GO:0016021		-1.28878976625026	0.00700350837273598
Cc09_g03370	GSCOC_T00017555001	A0A068U6X7	Protein of unknown function (DUF616)	GO:0016021		-1.2824071688827	0.000928021416536533
Cc06_g00830	GSCOC_T00023283001	A0A068UDS2	TRICHOME BIREFRINGENCE-LIKE 35	GO:0016021		-1.27192445743377	0.00510623395132337
Cc08_g01340	GSCOC_T00038401001	A0A068UYW9	Omega-amidase NIT2	GO:0009570;GO:0005829;GO:0050152;GO:0008270;GO:0006108;GO:0006807;GO:0006107		-1.27147992318523	0.00113242051443461
Cc11_g15580	GSCOC_T00038075001	A0A068UY60	Glutamate--glyoxylate aminotransferase 2	GO:0003824;GO:0030170;GO:0009058		-1.26816632855395	0.00499755762767651
Cc07_g14060	GSCOC_T00036660001	A0A068U1T5	nicotinamidase 1	GO:0008936;GO:0019365;GO:0009737	AT2G22570	-1.26606929198409	0.000802447594048918
Cc09_g04720	GSCOC_T00017391001	A0A068U6G0	DNA (cytosine-5)-methyltransferase DRM1	GO:0008168;GO:0006306		-1.24791855991272	0.00938546456501842
Cc03_g05370	GSCOC_T00026286001	A0A068TV75	Transcription factor bHLH34	GO:0046983		-1.24693228694931	0.00841760113745979
Cc01_g00670	GSCOC_T00011053001	A0A068VAE5	Protochlorophyllide-dependent translocon component 52, chloroplastic	GO:0051537;GO:0010277		-1.24560500197026	0.000604217739808657
Cc03_g06960	GSCOC_T00026528001	A0A068TTK0	triglyceride lipases;triglyceride lipases	GO:0006629		-1.24193615704052	0.00429574436193121
Cc01_g20300	GSCOC_T00015950001	A0A068U4V5	Protein TRANSPORT INHIBITOR RESPONSE 1		AT3G62980	-1.23869612465467	0.00485577013484186
Cc02_g25840	GSCOC_T00028691001	A0A068UM88	Ribose-phosphate pyrophosphokinase 5, chloroplastic	GO:0000287;GO:0004749;GO:0009116;GO:0009165;GO:0009156		-1.23858311895545	0.00112411711403186
Cc06_g15040	GSCOC_T00030888001	A0A068URL8	Probable purine permease 5	GO:0016021;GO:0015211		-1.22911113604171	0.00840027025131049
Cc02_g21760	GSCOC_T00014822001	A0A068TN73	High affinity sulfate transporter 2	GO:0016021;GO:0008271		-1.21733620375047	0.0090959531318059
Cc02_g02270	GSCOC_T00020077001	A0A068UBW4	Uncharacterized protein At3g49140			-1.20101206261842	0.00855725104711408
Cc01_g09000	GSCOC_T00023941001	A0A068UEB5	Putative uncharacterized protein			-1.1974228985084	0.000951904038523101
Cc11_g08810	GSCOC_T00032823001	A0A068TZI1	U-box domain-containing protein 10	GO:0004842		-1.19149733890125	0.00738891384638887
Cc03_g00550	GSCOC_T00025638001	A0A068TR95	O-acetyltransferase family protein	GO:0016021		-1.18257809326311	0.00651496703120601
Cc01_g00870	GSCOC_T00011082001	A0A068VAG0	Hypothetical protein	GO:0016021		-1.17552117588721	0.00776209821719095
Cc02_g20250	GSCOC_T00014631001	A0A068TM81	Protein of unknown function (DUF1005)			-1.17063018653331	0.00315381800962579
Cc07_g02330	GSCOC_T00039419001	A0A068U3E6	Peptidyl-prolyl cis-trans isomerase CYP38, chloroplastic	GO:0003755		-1.16861442499571	0.00504045708913179
Cc06_g15100	GSCOC_T00030880001	A0A068UPL7	Omega-6 fatty acid desaturase, chloroplastic	GO:0016021;GO:0006629		-1.14966050653398	0.001079418044641
Cc07_g03180	GSCOC_T00039536001	A0A068U3Q3	Putative 3-dehydroquinate synthase	GO:0003856;GO:0016491;GO:0009073		-1.14939487095346	0.0034813378241628
Cc04_g05490	GSCOC_T00022304001	A0A068TSF2	Putative Ribulose bisphosphate carboxylase/oxygenase activase, chloroplastic	GO:0005524		-1.1451442818356	0.00540617109953209
Cc08_g08950	GSCOC_T00017233001	A0A068V6F3	Putative Probable GTP-binding protein EngB	GO:0005525		-1.1197551596428	0.00568517642877185
Cc00_g19880	GSCOC_T00007586001	A0A068VJ28	Oxoglutarate/iron-dependent oxygenase	GO:0005506;GO:0031418;GO:0016705		-1.11689895595224	0.000837041779302823
Cc02_g04620	GSCOC_T00020379001	A0A068UCJ8	U-box domain-containing protein 35	GO:0005524;GO:0004672;GO:0004842		-1.09484320927598	0.00851118009898889
Cc04_g00580	GSCOC_T00021677001	A0A068TP35	Protein STRUBBELIG-RECEPTOR FAMILY 6	GO:0016021;GO:0005524;GO:0004672		-1.08326824661108	0.00433475289046041
Cc02_g00850	GSCOC_T00019885001	A0A068U910	Polyketide cyclase/dehydrase and lipid transport superfamily protein	GO:0016021;GO:0008289		-1.04304464373903	0.00314828432647622
Cc01_g12370	GSCOC_T00028168001	A0A068UKD5	Ras-related protein RABE1c	GO:0005525;GO:0003924		-1.02124930041735	0.00919497068007057
Cc02_g05810	GSCOC_T00039100001	A0A068UZH5	Uncharacterized 38.1 kDa protein	GO:0004518;GO:0003676		-1.00455076077117	0.00279517455386413
Cc09_g00790	GSCOC_T00017904001	A0A068U8G9	Putative Cysteine proteinase inhibitor 1	GO:0005618;GO:0005829;GO:0009506;GO:0005773;GO:0004869		-0.983532775326215	0.00968056397565138
Cc03_g00430	GSCOC_T00025624001	A0A068TS20	Dihydrolipoyl dehydrogenase 1, mitochondrial	GO:0004148;GO:0050660;GO:0045454		-0.96749656672415	0.00415319989148044
Cc02_g18640	GSCOC_T00014414001	A0A068TLF9	Presequence protease 1, chloroplastic/mitochondrial	GO:0003824;GO:0046872;GO:0006508		-0.960989482782034	0.00409711497548484

## Sheet: Up-regulated
Gene ID	ORF Name	Uniprot acession	Protein Name	GO Terms	TAIR	Log2FC	FDR
Cc09_g07390	GSCOC_T00036268001	A0A068UVZ9	Putative Reticuline oxidase-like protein	GO:0071949;GO:0016491	AT4G20820	20.545234252784	6.54270303251281e-05
Cc01_g08410	GSCOC_T00015547001	A0A068V4Y4	Putative Lysosomal beta glucosidase	GO:0004553;GO:0005975		20.468181965289	7.06256622047545e-05
Cc10_g04010	GSCOC_T00034989001	A0A068TYK3	Hypothetical protein	GO:0048364		20.468181965289	7.06256622047545e-05
Cc03_g09220	GSCOC_T00042698001	A0A068V2V2	Putative UDP-glycosyltransferase 75D1	GO:0008194	AT4G15550	20.0078935608236	2.06322785639953e-07
Cc08_g11420	GSCOC_T00027143001	A0A068UIP3	Expansin-like B1	GO:0005576;GO:0019953	AT4G17030	10.9664336130167	6.27462991342654e-09
Cc02_g27970	GSCOC_T00025155001	A0A068UHN2	Uncharacterized protein			9.082481494398	2.33217155689099e-05
Cc03_g06560	GSCOC_T00026456001	A0A068TTG3	Putative Transcription factor MYB48	GO:0003677	AT5G59780	9.03718899876436	9.51864742022692e-07
Cc07_g18370	GSCOC_T00018761001	A0A068U858	Predicted protein			8.23976890750813	2.06335338247538e-19
Cc01_g04050	GSCOC_T00040848001	A0A068V1H7	Putative G-type lectin S-receptor-like serine/threonine-protein kinase RLK1	GO:0016021;GO:0005524;GO:0004674	AT2G23950	8.04831313904751	0.00013418916154612
Cc07_g09470	GSCOC_T00037237001	A0A068U118	Hypothetical protein			8.04349775006589	2.88413083779396e-31
Cc08_g11410	GSCOC_T00027142001	A0A068UIH5	Expansin-like B1	GO:0005576;GO:0019953	AT4G17030	7.85143022543176	4.24947873751626e-13
Cc08_g07140	GSCOC_T00025316001	A0A068UH12	UDP-glycosyltransferase 73C3	GO:0008194	AT2G36780	7.68773255983228	0.00106013656787554
Cc08_g07660	GSCOC_T00025409001	A0A068UHY7	Putative VQ motif-containing protein			7.57937548922388	0.00222116052464128
Cc10_g07580	GSCOC_T00034503001	A0A068U073	Putative basic leucine-zipper 5	GO:0003700	AT2G18160	7.4717152928806	0.00450070347959229
Cc11_g17390	GSCOC_T00038305001	A0A068V0H7	Putative Bidirectional sugar transporter SWEET15	GO:0000139;GO:0005887;GO:0008515;GO:0071215;GO:0071470;GO:0071446;GO:0009793;GO:0010150;GO:0010431	AT5G13170	7.43782520465983	0.00311993408816171
Cc03_g07460	GSCOC_T00026598001	A0A068TTP3	Cellulose synthase-like protein D1	GO:0016021;GO:0016760;GO:0071555;GO:0030244	AT2G33100	7.23954829045088	7.22306161277501e-10
Cc04_g05250	GSCOC_T00022272001	A0A068TQP9	Heat shock 70 kDa protein	GO:0005524	AT3G12580	7.16281113903043	1.10580503467851e-20
Cc04_g15680	GSCOC_T00042344001	A0A068V2I5	Putative Ent-kaurenoic acid oxidase 1	GO:0020037;GO:0005506;GO:0004497;GO:0016705	AT5G45340	6.99726233514532	0.000604217739808657
Cc05_g01470	GSCOC_T00018227001	A0A068V6I2	60S acidic ribosomal protein P0-1	GO:0005840;GO:0042254		6.92975977980779	5.72927860232692e-26
Cc00_g15520	GSCOC_T00000738001	A0A068VKB1	Beta-fructofuranosidase, insoluble isoenzyme 1	GO:0004553;GO:0005975	AT3G52600	6.78904769035907	0.00715554899489774
Cc00_g20730	GSCOC_T00001290001	A0A068VJ42	Major allergen Mal d 1	GO:0010427;GO:0004864;GO:0038023;GO:0009738;GO:0006952		6.76069322308427	0.00169969541045974
Cc11_g07160	GSCOC_T00018092001	A0A068V6N6	Defensin-like protein	GO:0006952		6.75203655725049	0.00754322389491922
Cc02_g11220	GSCOC_T00029439001	A0A068TTZ6	Transketolase, chloroplastic	GO:0004802	AT3G60750	6.66443883867916	4.44526658108461e-15
Cc07_g13110	GSCOC_T00036787001	A0A068U241	Putative Ethylene-responsive transcription factor 15	GO:0005634;GO:0003677;GO:0003700	AT3G23240	6.55059495968307	4.20916652635013e-12
Cc08_g08470	GSCOC_T00009040001	A0A068VCL0	Putative Dehydration-responsive protein RD22	GO:0005768;GO:0005802;GO:0009651	AT5G25610	6.49815158418489	8.55198150651217e-08
Cc11_g10140	GSCOC_T00032617001	A0A068TWE6	LOB domain-containing protein 41		AT3G02550	6.36211017993229	6.47913581601323e-06
Cc10_g03640	GSCOC_T00024895001	A0A068UHB4	Hypothetical protein			6.26936821821325	0.0020787812635246
Cc04_g00860	GSCOC_T00021712001	A0A068TN99	Sucrose synthase	GO:0016157;GO:0005985	AT3G43190	6.14674643292346	2.53907959331135e-08
Cc03_g07610	GSCOC_T00026616001	A0A068TTQ9	Putative Predicted protein	GO:0009737		6.10566986563995	1.07410105688607e-17
Cc08_g16010	GSCOC_T00035549001	A0A068UUR7	Putative highly ABA-induced PP2C gene 2	GO:0046872;GO:0004722	AT5G59220	6.09902166873856	4.13761915122845e-12
Cc01_g10130	GSCOC_T00024094001	A0A068UH90	Histone H2B.2	GO:0000786;GO:0005634;GO:0003677;GO:0046982	AT1G08170	6.01364324091879	2.1343585213322e-08
Cc10_g08360	GSCOC_T00034397001	A0A068TXA9	unknown protein; FUNCTIONS IN	GO:0005886		5.99434348342616	0.000128078583993011
Cc02_g13430	GSCOC_T00029158001	A0A068TU92	Putative Predicted protein			5.92588927705963	4.13176271418705e-12
Cc06_g01030	GSCOC_T00023309001	A0A068UDU2	Putative UPF0098 protein MTH_273			5.92400537376058	6.23408944386614e-05
Cc09_g03820	GSCOC_T00017499001	A0A068U6U4	12-oxophytodienoate reductase 1	GO:0010181;GO:0016491	AT1G76690	5.77675640834667	1.81095613813196e-06
Cc01_g02990	GSCOC_T00019058001	A0A068V7F9	UDP-glucose flavonoid 3-O-glucosyltransferase 6	GO:0008194		5.58618012959305	0.00402322948379167
Cc00_g07820	GSCOC_T00007023001	A0A068VEX9	Putative unknown protein; FUNCTIONS IN	GO:0016021		5.56852122407442	3.08291668582622e-12
Cc07_g10030	GSCOC_T00037166001	Q1A524	Dehydrin DH1a	GO:0009415	AT3G50980	5.42287965323147	2.39059531715999e-34
Cc00_g30350	GSCOC_T00012664001	A0A068VMA5	Putative UDP-glucose flavonoid 3-O-glucosyltransferase 3	GO:0016021;GO:0008194	AT3G21790	5.39270889738679	3.43834386566188e-15
Cc04_g04040	GSCOC_T00022121001	A0A068TRZ8	Late embryogenesis abundant protein Dc3		AT1G52690	5.37163173014951	1.80900870280111e-14
Cc02_g38650	GSCOC_T00027834001	A0A068UKL6	Putative Late embryogenesis abundant (LEA) hydroxyproline-rich glycoprotein family	GO:0016021;GO:0005886		5.2874983794253	5.83133749500915e-18
Cc02_g04540	GSCOC_T00020371001	A0A068U9Y5	Hexose carrier protein HEX6	GO:0016021;GO:0022857		5.24122079017147	0.00993704879057409
Cc07_g07330	GSCOC_T00040079001	A0A068U4U6	Putative basic leucine-zipper 6	GO:0003700	AT1G75390	5.20666060250922	2.62157059960223e-11
Cc09_g09980	GSCOC_T00041104001	A0A068V1B2	Bidirectional sugar transporter SWEET2a	GO:0016021;GO:0005886;GO:0008643	AT3G14770	5.11694669423254	0.00844714069596291
Cc02_g22570	GSCOC_T00014932001	A0A068TQB0	Putative RmlC-like cupins superfamily protein	GO:0045735		5.11613747393016	1.92902529745445e-05
Cc11_g04480	GSCOC_T00004798001	A0A068VNA2	18.5 kDa class I heat shock protein		AT5G59720	5.11265846413753	0.00289469323364428
Cc03_g06290	GSCOC_T00026419001	A0A068TSP4	Putative Mitochondrial import receptor subunit TOM22 homolog 1	GO:0016021		5.10261838040118	0.00866795285322717
Cc05_g11470	GSCOC_T00021311001	A0A068UCH1	Putative sodium/calcium exchanger family protein / calcium-binding EF hand family protein	GO:0016021;GO:0005509;GO:0055085		5.06405808636854	2.54991647848036e-05
Cc00_g04190	GSCOC_T00006614001	A0A068VCK3	60S ribosomal protein L10-2	GO:0005840;GO:0003735;GO:0006412	AT1G26910	4.98377859828612	7.1881959577542e-20
Cc02_g17270	GSCOC_T00014237001	Q1A522	Putative Late embryogenesis abundant protein	GO:0005829;GO:0009415	AT2G21490	4.94849264393264	2.83683733670175e-05
Cc08_g16780	GSCOC_T00035651001	A0A068UX97	Putative uncharacterized protein	GO:0005634;GO:0043565;GO:0006355	AT2G46680	4.94567983685778	1.73286287296296e-14
Cc02_g08330	GSCOC_T00029808001	A0A068TVQ8	Putative Zinc finger protein ZAT11		AT2G37430	4.92537991351657	0.000184515686294455
Cc02_g35350	GSCOC_T00042862001	A0A068V3V7	Putative Uncharacterized protein R707	GO:0047216;GO:0006012	AT2G47180	4.91692877527339	7.63785509200527e-09
Cc05_g06110	GSCOC_T00009865001	A0A068VI38	Beta-amylase	GO:0102229;GO:0016161;GO:0000272	AT4G15210	4.91419183066177	7.75654913686026e-08
Cc01_g07390	GSCOC_T00030175001	A0A068UQ72	Alcohol dehydrogenase-like 7	GO:0016491;GO:0008270	AT5G42250	4.89704890137418	1.24794119368708e-06
Cc01_g01100	GSCOC_T00037984001	A0A068UX86	Putative UDP-glycosyltransferase 85A3		AT1G22380	4.88035697752922	1.10580503467851e-20
Cc02_g07220	GSCOC_T00029972001	A0A068TV45	Bifunctional inhibitor/lipid-transfer protein/seed storage 2S albumin superfamily protein	GO:0005504;GO:0009627		4.80664861152914	6.3388342060032e-12
Cc00_g26520	GSCOC_T00008501001	A0A068VNL8	Hypothetical protein	GO:0016021		4.73954065557379	0.00012753871216619
Cc04_g11330	GSCOC_T00037304001	A0A068UW23	Putative protein kinase family protein / peptidoglycan-binding LysM domain-containing protein	GO:0016021;GO:0005524;GO:0004672		4.67279784230138	0.00291388739577174
Cc06_g18190	GSCOC_T00040424001	A0A068V122	Putative uncharacterized protein			4.66889230941099	2.9430462337579e-05
Cc02_g23670	GSCOC_T00015069001	A0A068TQM6	22.7 kDa class IV heat shock protein		AT4G10250	4.62763120795157	0.000152505464267395
Cc00_g34980	GSCOC_T00013334001	A0A068VNK7	UDP-glucose flavonoid 3-O-glucosyltransferase 6	GO:0016021	AT3G21790	4.59339076232972	2.76820586687134e-06
Cc06_g07880	GSCOC_T00031201001	A0A068US61	Defensin-like protein	GO:0006952		4.57432407814804	2.74539666248304e-25
Cc01_g07420	GSCOC_T00030179001	A0A068UMS9	Alcohol dehydrogenase-like 7	GO:0016491;GO:0008270	AT5G42250	4.55606821502896	6.94371216455349e-07
Cc04_g16330	GSCOC_T00035719001	A0A068UV56	Thioredoxin-like 1-2, chloroplastic		AT5G61440	4.45937446722347	2.41396153809212e-11
Cc07_g20940	GSCOC_T00027252001	A0A068ULB5	Hypothetical protein			4.45768999907014	0.00663105566649843
Cc04_g14500	GSCOC_T00040692001	A0A068V398	Ribulose bisphosphate carboxylase/oxygenase activase 1, chloroplastic	GO:0005524	AT2G39730	4.45204137022356	5.28229798776267e-15
Cc02_g14040	GSCOC_T00029066001	A0A068TVV1	Hypothetical protein			4.45126736698058	1.76295297676512e-16
Cc11_g04470	GSCOC_T00004798001	A0A068VNA2	18.5 kDa class I heat shock protein		AT5G59720	4.4398247660129	0.00139843792488795
Cc02_g26920	GSCOC_T00025001001	A0A068UHF8	Putative uncharacterized protein	GO:0016021		4.43923059450565	5.16327154294425e-10
Cc08_g02730	GSCOC_T00037759001	A0A068UXJ0	Carboxylesterase 1	GO:0016021;GO:0016787		4.4342060595181	0.000803489651740169
Cc00_g13500	GSCOC_T00009968001	A0A068VH46	ELMO/CED-12 family protein			4.23224130767558	2.41446927067602e-06
Cc11_g05220	GSCOC_T00020463001	A0A068UB42	Bifunctional inhibitor/lipid-transfer protein/seed storage 2S albumin superfamily protein	GO:0005504;GO:0009627		4.22455620470318	1.49011502603424e-07
Cc04_g02360	GSCOC_T00021907001	A0A068TNP0	Inositol oxygenase 1	GO:0005737;GO:0050113;GO:0005506;GO:0019310	AT1G14520	4.21830071966051	1.81811530449657e-08
Cc02_g13580	GSCOC_T00029130001	A0A068TU76	Putative Late embryogenesis abundant protein (LEA) family protein			4.21787728075074	9.42185545934617e-07
Cc03_g01630	GSCOC_T00025782001	A0A068TS98	Putative Protein of unknown function (DUF581)	GO:0000932	AT5G49120	4.19144150246208	3.56173644621306e-20
Cc03_g03470	GSCOC_T00026033001	A0A068TUK1	Putative unknown protein; BEST Arabidopsis thaliana protein match is			4.12405476378437	5.88727411857437e-12
Cc10_g06500	GSCOC_T00034647001	A0A068TXZ2	Purine permease 3	GO:0016021;GO:0015211	AT1G28220	4.1085882379697	1.209606826826e-07
Cc02_g18030	GSCOC_T00014336001	A0A068TMC7	Non-symbiotic hemoglobin 1	GO:0020037;GO:0046872;GO:0019825;GO:0005344	AT2G16060	4.08487529717878	5.75855223047839e-09
Cc07_g11420	GSCOC_T00037003001	A0A068U0J4	IQ-domain 20	GO:0005730;GO:0005886;GO:0005516;GO:0051592	AT1G74690	4.08284523782378	0.00733325222900952
Cc07_g18730	GSCOC_T00018707001	A0A068U901	Putative Probable S-adenosylmethionine-dependent methyltransferase At5g37990	GO:0008168		4.06901896377219	6.44541619060507e-05
Cc11_g10780	GSCOC_T00032530001	A0A068TWB9	Protein of unknown function, DUF617	GO:0010274		4.0589229543369	0.00315381800962579
Cc00_g30840	GSCOC_T00006253001	A0A068VPV9	Putative NAC domain-containing protein 29	GO:0005634;GO:0003677;GO:0006355	AT5G64530	4.04712381945756	0.00111781138886234
Cc11_g17170	GSCOC_T00038276001	A0A068UY66	WRKY DNA binding protein	GO:0005634;GO:0003700;GO:0043565	AT5G13080	4.01920225697748	6.91475238520738e-06
Cc02_g20880	GSCOC_T00014710001	A0A068TN48	nicotinamidase 1	GO:0003824		4.01582379639658	4.678521301594e-07
Cc11_g03420	GSCOC_T00040780001	A0A068V1F3	Putative Glucan endo-1,3-beta-glucosidase 13	GO:0004553;GO:0005975		3.97296231753877	0.00973345103803747
Cc11_g07770	GSCOC_T00018007001	A0A068V677	Pathogenesis-related protein R major form		AT4G11650	3.95549202766746	6.05707631782713e-06
Cc02_g23600	GSCOC_T00015060001	A0A068TN54	Probable peptide/nitrate transporter At1g59740	GO:0016021;GO:0022857		3.93377086732308	0.000758920567697453
Cc07_g02770	GSCOC_T00039483001	A0A068U1M2	Probable galacturonosyltransferase-like 9	GO:0016757;GO:0006979	AT3G28340	3.86151460345171	0.00738075841413858
Cc02_g01010	GSCOC_T00019909001	A0A068U9M6	Putative Homeobox-leucine zipper protein ATHB-7	GO:0005634;GO:0043565;GO:0006355	AT2G46680	3.85246682036303	9.92922559202369e-12
Cc00_g08260	GSCOC_T00003339001	A0A068VF84	Putative Disease resistance protein RPM1	GO:0043531		3.81537471593476	1.60280770991304e-06
Cc08_g05930	GSCOC_T00024392001	A0A068UGC2	Putative embryo defective 3006	GO:0000818		3.81029375209266	0.00763149509992356
Cc04_g09860	GSCOC_T00042517001	A0A068V531	HVA22-like protein d	GO:0016021	AT5G50720	3.80304332552024	5.20433219411694e-09
Cc06_g03920	GSCOC_T00023692001	A0A068UE60	Putative uncharacterized protein			3.78794330724261	9.1172198222072e-06
Cc07_g11100	GSCOC_T00037039001	A0A068U108	Heavy metal-associated isoprenylated plant protein 26	GO:0046872;GO:0030001	AT5G66110	3.78181352562363	1.89133375800495e-11
Cc04_g04160	GSCOC_T00022136001	A0A068TP88	Lactoylglutathione lyase / glyoxalase I family protein			3.77024455145232	2.06333814093497e-06
Cc05_g08620	GSCOC_T00016889001	A0A068V5L8	Hypothetical protein			3.76022557944712	0.000789474598776737
Cc02_g35340	GSCOC_T00042863001	A0A068V5V2	Putative UDP-glucuronate	GO:0047216;GO:0006012	AT2G47180	3.71433590821492	5.35325385151998e-05
Cc05_g12500	GSCOC_T00021185001	A0A068UCE6	NAC domain-containing protein 72	GO:0005634;GO:0003677;GO:0006355	AT3G15500	3.68921116122226	1.01564722649861e-14
Cc06_g15970	GSCOC_T00030751001	A0A068UNN0	Putative 18 kDa seed maturation protein	GO:0009793		3.68642797490464	0.000895925891729494
Cc06_g20220	GSCOC_T00022935001	A0A068UCQ0	Probable nitrite transporter At1g68570	GO:0016021;GO:0022857	AT1G68570	3.66366933594774	0.00793544139829762
Cc11_g09060	GSCOC_T00032793001	A0A068TZG5	RING/FYVE/PHD zinc finger superfamily protein	GO:0016021;GO:0008270		3.66032349038399	2.58393442569209e-11
Cc04_g04290	GSCOC_T00022152001	A0A068TS31	26.5 kDa heat shock protein, mitochondrial			3.65657745439267	0.00552383655895299
Cc10_g15100	GSCOC_T00033677001	A0A068USL3	Putative uncharacterized protein	GO:0005634;GO:0003677;GO:0003700	AT5G64750	3.63883524452618	7.73711745064634e-05
Cc06_g02060	GSCOC_T00023446001	A0A068UDB6	Putative Encodes a protein involved in salt tolerance, names SIS (Salt Induced Serine rich).	GO:0009651		3.61001924940603	1.82005973175216e-05
Cc04_g02140	GSCOC_T00021882001	A0A068TRD7	NADH dehydrogenase [ubiquinone] iron-sulfur protein 7, mitochondrial	GO:0051539;GO:0046872;GO:0008137;GO:0048038	AT5G11770	3.59625047063475	5.19944573992573e-07
Cc09_g10840	GSCOC_T00040996001	Q07351	Monosaccharide-sensing protein 2	GO:0016021;GO:0022857;GO:0016021;GO:0022857;GO:0008643	AT4G35300	3.57848091108072	4.54550702139878e-36
Cc03_g09500	GSCOC_T00030930001	A0A068UP21	Hypothetical protein			3.55062993055083	3.71292458233889e-05
Cc03_g09490	GSCOC_T00030927001	A0A068UPV1	Hypothetical protein			3.53635602488732	0.000665095165409853
Cc00_g17430	GSCOC_T00013477001	A0A068VHM7	Isoflavone reductase homolog P3		AT1G75280	3.52147431896192	0.000848981885198199
Cc09_g03240	GSCOC_T00017575001	A0A068U7W6	Putative F-box protein At2g02240		AT2G02240	3.49894098105978	1.35604706862963e-05
Cc11_g11230	GSCOC_T00032472001	A0A068TW65	Putative uncharacterized protein			3.49783096306462	0.00044401671465127
Cc04_g12540	GSCOC_T00005318001	A0A068V8G8	Cell division cycle protein 48 homolog	GO:0005524;GO:0016787	AT5G03340	3.48025781632991	1.07124124841165e-09
Cc05_g14290	GSCOC_T00038836001	A0A068UZQ7	Putative uncharacterized protein			3.4800988203005	6.18289168311913e-07
Cc07_g09620	GSCOC_T00037218001	A0A068U100	Putative Late embryogenesis abundant (LEA) protein			3.47925580320289	0.00304249553336294
Cc02_g37320	GSCOC_T00028008001	A0A068UKQ1	F-box protein PP2-A13	GO:0009611	AT1G12710	3.44617911188193	6.34203877803871e-06
Cc10_g07470	GSCOC_T00034517001	A0A068TYM7	Putative Uncharacterized WD repeat-containing protein alr3466	GO:0016021		3.42887392045701	5.73922323085762e-06
Cc03_g01720	GSCOC_T00025794001	A0A068TU26	UDP-glucuronic acid decarboxylase 1		AT3G62830	3.42696148502809	1.45581340787542e-08
Cc06_g16930	GSCOC_T00004149001	A0A068VCV4	Transcription factor	GO:0016602;GO:0003677;GO:0003700	AT1G30500	3.42594287203412	0.000540864518489227
Cc06_g05290	GSCOC_T00043072001	A0A068V477	Putative PHYTOSULFOKINE 3 PRECURSOR	GO:0005576;GO:0008083;GO:0008283	AT3G44735	3.42470589613792	3.08061519455785e-08
Cc05_g00180	GSCOC_T00017043001	A0A068V645	UDP-arabinose 4-epimerase 1	GO:0016021;GO:0003978;GO:0006012		3.40208237865006	0.00663192932392062
Cc01_g11900	GSCOC_T00028106001	A0A068UMV9	Probable serine/threonine-protein kinase RLCKVII	GO:0005524;GO:0004674	AT5G02800	3.36423533685193	4.67757283673798e-21
Cc07_g13660	GSCOC_T00036709001	A0A068U1Y0	Geraniol dehydrogenase 1	GO:0016491;GO:0008270	AT4G37990	3.36345888131843	0.00384527983322418
Cc07_g01900	GSCOC_T00039368001	A0A068U0L7	Cytochrome c oxidase subunit 5C	GO:0016021;GO:0005746		3.35896466694343	0.000262489728603594
Cc01_g10320	GSCOC_T00024120001	A0A068UFG7	Putative RING finger and CHY zinc finger domain-containing protein 1	GO:0008270;GO:1902456	AT5G22920	3.33875070355213	5.5775575742862e-06
Cc03_g09460	GSCOC_T00030923001	A0A068UPB9	Hypothetical protein			3.32010383667602	0.00116438950490579
Cc02_g31770	GSCOC_T00027495001	A0A068UJY9	ADP-ribosylation factor	GO:0005525		3.31159394744788	0.0099914338865921
Cc06_g16940	GSCOC_T00004150001	A0A068VD56	Hypothetical protein			3.2775460272058	0.000822244375421438
Cc01_g17390	GSCOC_T00016329001	A0A068U6A5	Hypothetical protein			3.2620408826584	6.96018912073498e-09
Cc04_g14510	GSCOC_T00040693001	A0A068V1H0	Putative Subtilisin inhibitor 1	GO:0004867;GO:0009611		3.25403005462685	0.000802670489594868
Cc10_g05650	GSCOC_T00034783001	A0A068TYA8	Zinc finger protein ZAT10		AT1G27730	3.2523773724104	7.62899235486259e-07
Cc11_g09350	GSCOC_T00032746001	A0A068TXT6	Putative uncharacterized protein	GO:0005634;GO:0005524;GO:0046872;GO:0004652;GO:0003723;GO:0006397;GO:0031123;GO:0043631	AT1G17980	3.24874142416272	3.29605489246596e-08
Cc05_g10070	GSCOC_T00021503001	A0A068UCY1	Hypothetical protein	GO:0016021		3.23233741204178	6.95909361096359e-06
Cc00_g17200	GSCOC_T00009145001	A0A068VHK5	Beta-amylase 1, chloroplastic	GO:0016161;GO:0000272		3.22410013451291	0.00212551481303308
Cc02_g18620	GSCOC_T00014412001	A0A068TP77	Putative Probable carboxylesterase 7	GO:0016787	AT2G03550	3.19424772935095	1.04128200451016e-10
Cc11_g12740	GSCOC_T00032276001	A0A068TVP6	NAC domain-containing protein 29	GO:0005634;GO:0003677;GO:0009793;GO:0009908;GO:0009835;GO:0010150;GO:0009825;GO:0006355	AT1G69490	3.1913367513536	0.00342192458159087
Cc06_g09580	GSCOC_T00041895001	A0A068U472	Predicted protein	GO:0016021		3.18622006996461	9.52177213635024e-05
Cc08_g14560	GSCOC_T00030207001	A0A068UQ88	Glutathione S-transferase T1			3.17898361504334	1.80280058159049e-05
Cc00_g23580	GSCOC_T00010323001	A0A068VK80	Isoflavone reductase homolog A622		AT4G39230	3.16182185588378	5.16327154294425e-10
Cc03_g02380	GSCOC_T00025880001	A0A068TSG3	Inactive beta-amylase 9	GO:0102229;GO:0016161;GO:0000272	AT5G18670	3.16099714774421	7.18803723962306e-14
Cc04_g06790	GSCOC_T00022476001	A0A068TSS2	Protein of unknown function, DUF599	GO:0016021		3.15127392210307	2.92658901934407e-06
Cc00_g32800	GSCOC_T00001453001	A0A068VMD5	unknown protein; FUNCTIONS IN			3.13733364558838	2.25983813455293e-06
Cc02_g05870	GSCOC_T00039107001	A0A068UZV3	Arogenate dehydrogenase 1, chloroplastic	GO:0008977;GO:0004665;GO:0006571	AT5G34930	3.12859563096218	6.73439736136585e-13
Cc00_g08270	GSCOC_T00003341001	A0A068VHW2	Isoflavone reductase homolog A622		AT1G75280	3.10943801042987	1.08256930311817e-06
Cc10_g10510	GSCOC_T00035989001	A0A068UVI8	putative protein kinase 1	GO:0005524;GO:0004674;GO:0046777		3.06906393359408	4.77745785898606e-05
Cc09_g00950	GSCOC_T00017878001	A0A068UA33	Putative Protein of unknown function (DUF506) _x0001_			3.0577628835382	0.00327363512022814
Cc00_g13930	GSCOC_T00006565001	A0A068VGI2	Isoflavone reductase homolog P3			3.0321948138407	7.15971720929876e-07
Cc05_g08100	GSCOC_T00016821001	A0A068V5V7	unknown protein; FUNCTIONS IN	GO:0016021	AT2G31090	3.02073108272867	2.09945985048009e-05
Cc01_g01870	GSCOC_T00019259001	A0A068V8A1	Pre-mRNA-processing-splicing factor 8	GO:0005681;GO:0030623;GO:0017070;GO:0000398	AT1G80070	3.01184622010877	0.000106099496804315
Cc01_g13400	GSCOC_T00028306001	A0A068UNB2	Protein phosphatase 2C 37	GO:0046872;GO:0004722	AT2G29380	2.98611459137488	1.10748214780415e-10
Cc02_g12550	GSCOC_T00029269001	A0A068TUC2	Putative Protein of unknown function (DUF761)	GO:0016021		2.98566043116019	1.52520607023568e-12
Cc06_g02310	GSCOC_T00023485001	A0A068UDD8	Putative Protein of unknown function (DUF668)	GO:0045927		2.95835339336098	2.01374558918134e-08
Cc08_g15340	GSCOC_T00035463001	A0A068UUY7	Putative Protein LURP-one-related 17		AT5G41590	2.95771585789665	1.04444227033785e-06
Cc06_g00370	GSCOC_T00023212001	A0A068UD28	Putative Protein of unknown function, DUF599	GO:0016021		2.94204875026481	0.00134225242801447
Cc00_g28710	GSCOC_T00011510001	A0A068VLP9	Hypothetical protein			2.94181920369728	5.39226064333869e-07
Cc10_g02590	GSCOC_T00024764001	A0A068UGZ6	Glucose-1-phosphate adenylyltransferase large subunit, chloroplastic/amyloplastic	GO:0009507;GO:0005524;GO:0008878;GO:0005978;GO:0019252	AT1G27680	2.93863896036237	3.70762759411995e-06
Cc07_g02500	GSCOC_T00039446001	A0A068U0T4	Peroxidase superfamily protein	GO:0020037;GO:0004601;GO:0006979	AT3G01420	2.93544992187884	0.00978156147944743
Cc08_g05330	GSCOC_T00024288001	A0A068UG43	Alternative oxidase 3, mitochondrial	GO:0016021;GO:0070469;GO:0009916;GO:0046872;GO:0102721	AT1G32350	2.92137485954945	0.00609706788526344
Cc03_g04200	GSCOC_T00026129001	A0A068TS74	Putative uncharacterized protein			2.91183861896072	2.68757689550725e-06
Cc11_g00330	GSCOC_T00019466001	A0A068V7X5	Alpha-galactosidase	GO:0052692;GO:0005975	AT5G08380	2.89977123570895	0.000313772369280226
Cc05_g13480	GSCOC_T00021057001	A0A068UBD8	Putative Septum-promoting GTP-binding protein 1	GO:0005525;GO:0003924		2.87908399133842	4.09679159237771e-09
Cc05_g12520	GSCOC_T00021180001	A0A068UC67	Hypothetical protein			2.8745096218562	9.07966549663151e-05
Cc07_g05950	GSCOC_T00039884001	A0A068U1R7	Putative Multidrug and toxin extrusion protein 1	GO:0016021;GO:0015297;GO:0042910	AT1G58340	2.86433375611191	0.00712767069564531
Cc06_g05300	GSCOC_T00043074001	A0A068V658	Putative PAN domain-containing protein At5g03700	GO:0005768;GO:0016021;GO:0005886;GO:0005802;GO:0048544		2.84839439162342	0.0018253879727208
Cc00_g00960	GSCOC_T00041159001	A0A068V1D7	Germin-like protein subfamily 1 member 7	GO:0048046;GO:0005618;GO:0030145;GO:0045735		2.84157369556227	0.00398671237286279
Cc11_g15830	GSCOC_T00038106001	A0A068UY76	Protein of unknown function (DUF707)			2.84036388962164	6.50070026246346e-06
Cc01_g16880	GSCOC_T00016390001	A0A068U8F0	Small ubiquitin-related modifier 1	GO:0005634	AT4G26840	2.8374191712418	1.40046677860368e-06
Cc06_g10850	GSCOC_T00041727001	A0A068U6K5	Zinc finger CCCH domain-containing protein 49	GO:0046872	AT2G19810	2.82702188140596	3.58581665283145e-05
Cc00_g15960	GSCOC_T00007992001	A0A068VH85	Isoflavone reductase homolog		AT4G39230	2.81459709866068	1.95521191946495e-06
Cc08_g15170	GSCOC_T00035443001	A0A068UUU1	Heat shock protein 83	GO:0005524;GO:0051082;GO:0006457	AT5G56000	2.80599178099723	4.76074090186585e-10
Cc03_g01730	GSCOC_T00025795001	A0A068TSA8	NAD(P)-binding Rossmann-fold superfamily protein	GO:0016021	AT3G62830	2.79466078570876	0.00344971064326224
Cc01_g07410	GSCOC_T00030177001	A0A068UMJ3	Alcohol dehydrogenase-like 7	GO:0016491;GO:0008270	AT5G42250	2.78878217741519	1.11995138224314e-06
Cc06_g19190	GSCOC_T00028971001	A0A068UPK0	Putative Vesicular GABA transporter	GO:0016021	AT2G41190	2.77782537459426	5.77316695083131e-05
Cc08_g13770	GSCOC_T00030306001	A0A068UNF3	non-yellowing 1		AT4G22920	2.76840322511631	8.30198683419126e-06
Cc05_g12750	GSCOC_T00021150001	A0A068UCC4	Protein of unknown function (DUF1223)			2.72572896243433	8.55811450925962e-05
Cc01_g13370	GSCOC_T00028302001	A0A068UKP3	Putative Protein of unknown function (DUF604)	GO:0016021		2.72378922640818	7.62366436460313e-05
Cc06_g19200	GSCOC_T00028972001	A0A068UMT2	Transmembrane amino acid transporter family protein	GO:0016021	AT2G41190	2.71683518509171	0.000147657808938628
Cc02_g00910	GSCOC_T00019892001	A0A068U9L7	Small heat shock protein, chloroplastic		AT4G27670	2.70919694732972	2.04265856191071e-05
Cc06_g00890	GSCOC_T00023292001	A0A068UFN0	Ferritin-1, chloroplastic	GO:0008199;GO:0004322;GO:0006879;GO:0006826		2.70217020628596	6.70912295500622e-05
Cc01_g08270	GSCOC_T00015527001	A0A068V6R7	Alcohol dehydrogenase-like 7	GO:0016491;GO:0008270	AT5G42250	2.68509847409519	1.95521191946495e-06
Cc02_g03520	GSCOC_T00020237001	A0A068UCB0	peptidoglycan-binding LysM domain-containing protein	GO:0016021		2.6751852525268	0.000628456898287145
Cc00_g18750	GSCOC_T00008462001	A0A068VLB9	Hypothetical protein	GO:0005524;GO:0004672	AT1G11330	2.66230193310061	2.23398105931866e-05
Cc00_g21580	GSCOC_T00006599001	A0A068VJK9	Putative Systemic acquired resistance protein SAR			2.66145779386108	0.002348588936981
Cc08_g11890	GSCOC_T00030559001	A0A068UN96	Oleosin Bn-III	GO:0016021;GO:0012511	AT4G25140	2.65899729366724	6.64507782225686e-11
Cc03_g02590	GSCOC_T00025913001	A0A068TRJ8	Sugar transporter ERD6-like 16	GO:0016021;GO:0022857	AT5G18840	2.64307481321199	0.000176770525306789
Cc01_g21050	GSCOC_T00005027001	A6XJR2	Sucrose synthase 2	GO:0016157;GO:0010555;GO:0009414;GO:0010431;GO:0005982;GO:0005985;GO:0016157;GO:0010555;GO:0009414;GO:0010431;GO:0005982;GO:0005985		2.6401082643819	0.000168097727733929
Cc02_g05970	GSCOC_T00039118001	A0A068UZW4	Putative Dehydration-responsive element-binding protein 2C	GO:0005634;GO:0003677;GO:0003700	AT2G40340	2.63276585326364	2.01883308795787e-11
Cc06_g06080	GSCOC_T00043179001	A0A068V450	Beta-fructofuranosidase, insoluble isoenzyme 1	GO:0004553;GO:0005975	AT2G36190	2.63252228912945	0.00659228868571341
Cc05_g04760	GSCOC_T00035011001	A0A068UVZ4	Putative Vacuolar amino acid transporter 1	GO:0016021	AT5G15240	2.62816162052464	0.0059573137374917
Cc06_g02080	GSCOC_T00023448001	A0A068UE58	Putative Uncharacterized protein			2.6250646035443	6.57590602314283e-05
Cc06_g07180	GSCOC_T00031296001	A0A068USC8	Putative Glycosyl hydrolase family protein	GO:0004553;GO:0005975		2.59658076193349	0.00462067048566413
Cc01_g14430	GSCOC_T00028442001	A0A068ULB1	Probable protein phosphatase 2C 25	GO:0004722	AT2G30020	2.59378840614351	0.000935237822327319
Cc10_g06050	GSCOC_T00034718001	A0A068TY62	Transcription factor TGA7	GO:0003700;GO:0043565;GO:0006351		2.57903070535304	4.1447492589743e-07
Cc02_g30370	GSCOC_T00018338001	A0A068V929	Early-responsive to dehydration stress protein (ERD4)	GO:0016021		2.57900569286208	0.00411996706269305
Cc05_g15960	GSCOC_T00038621001	A0A068UYJ9	NAC domain-containing protein 21/22	GO:0005634;GO:0003677;GO:0006355		2.57025514693861	0.000232886563359649
Cc06_g13830	GSCOC_T00041341001	A0A068U2Y8	Probable alpha,alpha-trehalose-phosphate synthase [UDP-forming] 11	GO:0005829;GO:0005739;GO:0003824;GO:0005992	AT2G18700	2.56775624720788	0.00289812799801186
Cc02_g19970	GSCOC_T00014577001	A0A068TPK7	Putative Codeine O-demethylase	GO:0046872;GO:0016491		2.54870189516712	4.15941643206978e-05
Cc08_g12090	GSCOC_T00030529001	A0A068UN76	Putative UPF0676 protein C1494.01	GO:0046872;GO:0016491		2.54499408408498	0.00458205566417222
Cc03_g09720	GSCOC_T00030959001	A0A068UPQ6	Probable aldo-keto reductase 2	GO:0016491	AT1G60710	2.54211373187803	1.24577974183248e-10
Cc05_g12510	GSCOC_T00021183001	A0A068UE09	NAC domain containing protein 2	GO:0005634;GO:0003677;GO:0006355		2.52799836174291	0.00622041595367098
Cc07_g10780	GSCOC_T00037074001	A0A068U059	Putative uncharacterized protein			2.5250637756311	0.00686670833883065
Cc07_g07300	GSCOC_T00040072001	A0A068U260	ACT domain repeat 1		AT5G65890	2.50827949972338	0.00155059669506864
Cc02_g14820	GSCOC_T00013904001	A0A068TN53	ARM repeat superfamily protein			2.50060261533491	0.000432505404617919
Cc02_g00930	GSCOC_T00019895001	A0A068U9X5	Putative uncharacterized protein	GO:0005634;GO:0005524;GO:0032502;GO:0006355;GO:0006351	AT4G37740	2.49657905183009	9.9555542022787e-07
Cc05_g11510	GSCOC_T00021307001	A0A068UEB1	Homogentisate 1,2-dioxygenase	GO:0004411;GO:0006559;GO:0006570	AT5G54080	2.48905364464912	6.25023817069869e-08
Cc06_g08070	GSCOC_T00031178001	A0A068UQA6	Probable galactinol--sucrose galactosyltransferase 6	GO:0009507;GO:0009506;GO:0003824;GO:0003729;GO:0009409;GO:0080167;GO:0006979	AT3G57520	2.46772806287055	0.000369813544885772
Cc00_g23810	GSCOC_T00007573001	A0A068VKA3	NAD(P)-binding Rossmann-fold superfamily protein			2.46648116924298	8.64072666479166e-05
Cc11_g09210	GSCOC_T00032770001	A0A068TZF7	Putative MATE efflux family protein 9	GO:0016021;GO:0015297;GO:0042910		2.45766856237856	0.000408127700750825
Cc05_g11890	GSCOC_T00021257001	A0A068UBJ6	MATE efflux family protein ALF5	GO:0016021;GO:0015297;GO:0042910	AT3G23560	2.45370327403372	1.03873788140767e-06
Cc09_g04460	GSCOC_T00017423001	A0A068U755	CTP synthase	GO:0005524;GO:0003883;GO:0044210;GO:0006541		2.45119615298449	0.000354764438909467
Cc04_g05060	GSCOC_T00022250001	A0A068TPK8	CBL-interacting serine/threonine-protein kinase 5	GO:0005524;GO:0004674;GO:0007165	AT5G10930	2.44519007003744	0.000245839326694573
Cc08_g00360	GSCOC_T00038533001	A0A068UZ17	Putative F-box/FBD/LRR-repeat protein At5g22670			2.44336006997659	8.76143623663842e-06
Cc06_g13410	GSCOC_T00041401001	A0A068U3Q5	Xyloglucan endotransglucosylase/hydrolase protein 22	GO:0048046;GO:0005618;GO:0004553;GO:0016762;GO:0042546;GO:0071555;GO:0010411	AT5G57560	2.44262946319064	8.93325526771929e-07
Cc02_g18280	GSCOC_T00014367001	A0A068TMF3	unknown protein; FUNCTIONS IN			2.4420167626547	2.32469650615045e-07
Cc07_g07540	GSCOC_T00040104001	A0A068U3C2	Homeobox-leucine zipper protein HAT22	GO:0005634;GO:0043565;GO:0006355	AT4G37790	2.43558748221222	4.72028759852038e-07
Cc04_g10260	GSCOC_T00042569001	A0A068V568	Putative Predicted protein			2.41732209239236	0.0090959531318059
Cc01_g17750	GSCOC_T00016287001	A0A068U5P6	Putative uncharacterized protein	GO:0016021		2.40961265973525	0.000454842249538685
Cc00_g22480	GSCOC_T00009893001	A0A068VJ79	Probable glutathione S-transferase parC			2.40214879699652	0.00324144028774548
Cc01_g11080	GSCOC_T00024226001	A0A068UHJ5	Putative Transcription factor TAFII-31	GO:0046982		2.38202239792	0.00332534244311322
Cc10_g11070	GSCOC_T00016674001	A0A068V4W8	Flavonol synthase/flavanone 3-hydroxylase	GO:0046872;GO:0016491		2.38108445089092	0.00622041595367098
Cc04_g16070	GSCOC_T00042398001	A0A068V287	Polynucleotide 5'-hydroxyl-kinase NOL9	GO:0016021		2.37727874905798	0.00336251505010629
Cc01_g07400	GSCOC_T00030176001	A0A068UND6	Alcohol dehydrogenase-like 7	GO:0016491;GO:0008270		2.37070073654703	0.00043528529865619
Cc00_g28410	GSCOC_T00003307001	A0A068VLM4	F-box protein ORE9			2.37025576821006	0.00748365842523924
Cc06_g11140	GSCOC_T00041693001	A0A068U4Y8	Putative Graves disease carrier protein	GO:0016021;GO:0005743;GO:0005347;GO:0015228;GO:1990559	AT4G26180	2.36296678471567	1.56387121451098e-09
Cc01_g01490	GSCOC_T00037900001	A0A068UXF7	Putative UDP-glycosyltransferase 74E2	GO:0008194		2.35548150947038	0.000430382520845646
Cc01_g20660	GSCOC_T00015906001	A0A068U4L8	Putative Translocator protein homolog	GO:0016021	AT2G47770	2.34916550810807	2.08151555703215e-07
Cc07_g01960	GSCOC_T00039375001	A0A068U0P6	Putative unknown protein; BEST Arabidopsis thaliana protein match is	GO:0016021		2.3433039068026	0.000265377489480512
Cc02_g11510	GSCOC_T00029403001	Q98IV5	MLO-like protein 6	GO:0016021;GO:0005516;GO:0006952;GO:0009607	AT1G61560	2.33996974016208	0.00388513511189822
Cc03_g03270	GSCOC_T00026009001	A0A068TUI2	Putative unknown protein; BEST Arabidopsis thaliana protein match is			2.33431074936652	1.3224651719654e-14
Cc01_g09030	GSCOC_T00023944001	A0A068UGX8	Hypothetical protein	GO:0016021		2.32451093623091	0.00172470355269955
Cc11_g11930	GSCOC_T00032381001	A0A068TVZ8	Putative Ninja-family protein AFP2	GO:0007165	AT3G29575	2.32345690376492	0.000261194927425054
Cc05_g08390	GSCOC_T00016860001	A0A068V7Q1	F-box protein ORE9			2.30702930303217	0.000232092397910484
Cc06_g01960	GSCOC_T00023436001	A0A068UDA4	17.5 kDa class I heat shock protein		AT1G53540	2.30302479029305	0.000236363673777931
Cc04_g12840	GSCOC_T00003258001	A0A068VDL8	Putative U-box domain-containing protein 19	GO:0004842	AT1G60190	2.28167393519344	1.94845787298065e-05
Cc02_g10840	GSCOC_T00029485001	A0A068TWR5	unknown protein; BEST Arabidopsis thaliana protein match is			2.28018876919756	5.08045368520617e-06
Cc06_g18910	GSCOC_T00028930001	A0A068ULU4	Plant protein 1589 of unknown function			2.27802464881344	9.48673920282707e-06
Cc04_g08180	GSCOC_T00022670001	A0A068TR80	Probable phosphatidylinositol 4-kinase type 2-beta At1g26270		AT2G03890	2.2603816018205	0.000744662839369495
Cc02_g09550	GSCOC_T00029643001	A0A068TV40	Duplicated homeodomain-like superfamily protein	GO:0005634;GO:0003677	AT5G08520	2.2491554581183	3.95868291388468e-09
Cc02_g08260	GSCOC_T00029824001	A0A068TUX0	Hypothetical protein	GO:0046872;GO:0030001		2.24846165645286	5.5107397568601e-05
Cc03_g05050	GSCOC_T00026242001	A0A068TSK2	Putative Cellulose synthase-like protein G3	GO:0016021;GO:0016760;GO:0071555;GO:0030244		2.24651983755966	0.000173541993516039
Cc06_g16300	GSCOC_T00030712001	A0A068UP65	Putative Polygalacturonase inhibitor			2.24609459264718	3.74098841482731e-05
Cc02_g09160	GSCOC_T00029693001	A0A068TUM5	Putative Trans-2,3-enoyl-CoA reductase	GO:0016021;GO:0016627;GO:0006629		2.23215925394175	4.28302132507084e-05
Cc01_g19020	GSCOC_T00016112001	A0A068U6A9	Heat stress transcription factor A-6b	GO:0042025;GO:0005634;GO:0003700;GO:0043565	AT3G22830	2.23089443509328	0.0010596712053609
Cc07_g12470	GSCOC_T00036869001	A0A068U0B9	Probable acyl-activating enzyme 5, peroxisomal	GO:0003824	AT5G16370	2.21351446925449	0.000150147671515624
Cc06_g09840	GSCOC_T00041861001	A0A068U570	Putative Dynein light chain LC6, flagellar outer arm	GO:0005737;GO:0030286;GO:0005874;GO:0003774;GO:0007017		2.20585748610523	0.000672856724610008
Cc10_g03100	GSCOC_T00024830001	A0A068UG39	unknown protein; Has 219 Blast hits to 202 proteins in 78 species			2.20575012652135	8.63798251871266e-08
Cc02_g18810	GSCOC_T00014436001	A0A068TMJ4	Abscisic acid 8'-hydroxylase 4	GO:0016021;GO:0020037;GO:0005506;GO:0004497;GO:0016705	AT3G19270	2.18926962585428	0.000420817965318406
Cc03_g03550	GSCOC_T00026046001	A0A068TRZ4	Sugar transport protein 13	GO:0016021;GO:0022857	AT5G26340	2.18407024077155	0.000578354597686637
Cc03_g09870	GSCOC_T00030977001	A0A068UPR7	Probable aldo-keto reductase 2	GO:0016491		2.17663152492765	0.00636600960382619
Cc02_g14480	GSCOC_T00013859001	A0A068TLF5	unknown protein; FUNCTIONS IN	GO:0016021		2.16913404050091	1.67530018147014e-07
Cc00_g22570	GSCOC_T00003010001	A0A068VJY1	Ubiquitin-conjugating enzyme E2 5	GO:0005524;GO:0016740		2.16312979242402	0.00217950937252118
Cc05_g01840	GSCOC_T00015771001	A0A068V5C0	GEM-like protein 5			2.15751980341826	0.00613127450396593
Cc08_g10050	GSCOC_T00026964001	A0A068UJ45	BEST Arabidopsis thaliana protein match is	GO:0016021		2.15702772471882	7.66299408234657e-08
Cc06_g02670	GSCOC_T00023526001	A0A068UDQ2	Probable protein phosphatase 2C 4	GO:0004722	AT1G07630	2.15565262415414	3.2296692420822e-06
Cc06_g12150	GSCOC_T00041571001	A0A068U649	Putative unknown protein; BEST Arabidopsis thaliana protein match is			2.15551504687262	0.00339508880145474
Cc06_g22480	GSCOC_T00012875001	A0A068VH90	UDP-glucose flavonoid 3-O-glucosyltransferase 6	GO:0008194		2.14800804106699	0.00366615307493722
Cc06_g16680	GSCOC_T00030651001	A0A068UP86	Putative polyol transporter 1	GO:0016021;GO:0022857	AT2G16120	2.14453653430238	8.72185733596941e-10
Cc08_g14340	GSCOC_T00030236001	A0A068UMM5	tetraspanin10	GO:0016021	AT1G63260	2.13979466970561	5.76105669393618e-05
Cc00_g11010	GSCOC_T00000139001	A0A068VG67	Hypothetical protein			2.1328479007994	0.00615249314195964
Cc02_g13700	GSCOC_T00029111001	A0A068TTX6	Putative Ethylene-responsive transcription factor 4	GO:0005634;GO:0003677;GO:0003700	AT5G44210	2.12949820215134	2.42990139786011e-05
Cc03_g07470	GSCOC_T00026599001	A0A068TVQ6	Putative F-box protein At2g02240		AT2G02360	2.12839699419198	0.000285862607325715
Cc10_g07300	GSCOC_T00034540001	A0A068TXQ7	Annexin D1	GO:0005509;GO:0005544;GO:0004377	AT1G35720	2.12075997872841	2.88042838354974e-05
Cc07_g10120	GSCOC_T00037157001	A0A068U0V1	Putative Epoxide hydrolase 2	GO:0003824		2.11351878373359	0.000759004473466467
Cc04_g04750	GSCOC_T00022210001	A0A068TQM1	unknown protein; FUNCTIONS IN	GO:0016021		2.10458805770721	0.00301845869848192
Cc10_g05500	GSCOC_T00034799001	A0A068TYB7	NAD(P)-binding Rossmann-fold superfamily protein		AT4G24220	2.09894340035351	0.00117969115541884
Cc03_g05420	GSCOC_T00026295001	A0A068TV76	Uncharacterised conserved protein UCP015417, _x0001_vWA			2.09036402643189	0.000965867444518583
Cc06_g02300	GSCOC_T00023483001	A0A068UEF6	Protein of unknown function (DUF604)			2.08701871111265	6.4154531468639e-06
Cc07_g19270	GSCOC_T00018614001	A0A068U7S2	NAD(P)H-hydrate epimerase	GO:0010181;GO:0046872;GO:0052856;GO:0052857;GO:0004733;GO:0008615	AT5G49970	2.08379042408615	4.89471325987098e-07
Cc07_g08780	GSCOC_T00040267001	A0A068U587	Putative Probable mannose-6-phosphate isomerase	GO:0004476;GO:0008270;GO:0005975;GO:0009298	AT3G02570	2.07877786989316	4.54793960059959e-08
Cc05_g13040	GSCOC_T00021111001	A0A068UB93	Hypothetical protein			2.07495818133604	0.00143087053715931
Cc04_g03100	GSCOC_T00021999001	A0A068TQ27	Putative Dynein light chain LC6, flagellar outer arm	GO:0005737;GO:0030286;GO:0005874;GO:0003774;GO:0007017		2.06855862122675	0.00106204153568834
Cc11_g17090	GSCOC_T00038265001	A0A068V0F0	unknown protein; Has 44 Blast hits to 44 proteins in 12 species	GO:0016021		2.0572656706462	5.30488845994787e-05
Cc01_g09900	GSCOC_T00024061001	A0A068UEJ7	Putative Lysine histidine transporter 1	GO:0016021		2.05580007403299	0.00457748685224079
Cc11_g09360	GSCOC_T00032744001	A0A068TZE8	Putative E3 ubiquitin-protein ligase RHA2A	GO:0016021	AT1G15100	2.04189278792841	2.15553648880992e-08
Cc05_g01440	GSCOC_T00018223001	A0A068V752	4-hydroxyphenylpyruvate dioxygenase	GO:0003868;GO:0009072		2.01715209705768	0.000338361729178147
Cc05_g07610	GSCOC_T00016755001	A0A068V504	Tyrosine aminotransferase	GO:0030170;GO:0008483;GO:0009058;GO:0006520		1.99730703796609	0.000433314102242769
Cc02_g23010	GSCOC_T00014980001	A0A068TNL6	Putative unknown protein; Has 286 Blast hits to 266 proteins in 81 species			1.98681263097612	0.00957040470617251
Cc02_g13120	GSCOC_T00029198001	A0A068TTD3	Putative CBS domain-containing protein CBSX5		AT4G27460	1.98609838983135	0.000744662839369495
Cc07_g12920	GSCOC_T00036814001	A0A068U090	Putative Universal stress protein A-like protein	GO:0005737;GO:0005886;GO:0043621		1.98166618284988	2.11000878256675e-05
Cc03_g03220	GSCOC_T00026004001	A0A068TUH8	Nuclear transcription factor Y subunit C-9	GO:0005634;GO:0046982		1.97753639232638	6.14421397193734e-07
Cc02_g37570	GSCOC_T00027973001	A0A068UKM9	( )-neomenthol dehydrogenase			1.97624015713193	0.00343496337352655
Cc11_g04600	GSCOC_T00004818001	A0A068VBD0	unknown protein; INVOLVED IN			1.97516011740013	0.00287967754596663
Cc02_g21570	GSCOC_T00014800001	A0A068TQ09	Hypothetical protein	GO:0003723		1.97289795655973	4.51591905103142e-05
Cc10_g07200	GSCOC_T00034553001	A0A068TXR7	BEST Arabidopsis thaliana protein match is	GO:0016021		1.96971062968482	8.62615182599365e-08
Cc09_g02320	GSCOC_T00017692001	A0A068U765	Elongator complex protein 6	GO:0033588;GO:0031538;GO:0008284;GO:2000024;GO:0006979;GO:0002098		1.96003668302567	0.00628005651370096
Cc00_g11020	GSCOC_T00000140001	A0A068VIU8	Secologanin synthase	GO:0020037;GO:0005506;GO:0004497;GO:0016705	AT3G14690	1.95403153403811	0.000663787751191719
Cc06_g23570	GSCOC_T00040552001	A0A068V0G6	Organic cation/carnitine transporter 7	GO:0016021;GO:0022857		1.95127946618486	1.34694040037765e-07
Cc02_g23650	GSCOC_T00015067001	A0A068TN60	Putative F-box protein At3g07870			1.93998674636976	0.000145338485506195
Cc07_g20060	GSCOC_T00033921001	A0A068UTK9	Probable glutathione S-transferase parC			1.9378624761897	0.00627162481101089
Cc10_g08850	GSCOC_T00034331001	A0A068TXB7	Metallothionein-like protein 1	GO:0046872		1.92951052550785	3.09780370388736e-05
Cc09_g09640	GSCOC_T00004085001	A0A068V9Y5	Putative pterin-4-alpha-carbinolamine dehydratase	GO:0008124;GO:0006729	AT1G29810	1.92826598980391	8.53447600593869e-06
Cc00_g33280	GSCOC_T00013700001	A0A068VQK2	Calcium-transporting ATPase 10, plasma membrane-type	GO:0005516		1.92809573287871	0.0063785550719635
Cc02_g26840	GSCOC_T00024989001	A0A068UHI5	unknown protein; FUNCTIONS IN	GO:0016021		1.91303976715081	0.000422195166892007
Cc02_g13650	GSCOC_T00029121001	A0A068TTY1	Auxin-repressed 12.5 kDa protein			1.91281870232157	0.000132924716021534
Cc07_g12670	GSCOC_T00036845001	A0A068U0A6	Hypothetical protein			1.91138559587032	0.000796948653593391
Cc11_g16360	GSCOC_T00038174001	A0A068UXN7	Heat shock protein, putative		AT4G27670	1.9093059694747	0.006771854550631
Cc05_g04870	GSCOC_T00035025001	A0A068UU72	Putative Transmembrane protein 97	GO:0016021		1.90578334276785	0.00134619154081935
Cc07_g04990	GSCOC_T00039760001	A0A068U2I9	Probable isoprenylcysteine alpha-carbonyl methylesterase ICMEL2	GO:0016021;GO:0016787	AT3G02410	1.9041659510525	0.00211180385821692
Cc04_g08920	GSCOC_T00022768001	A0A068TQT1	unknown protein; INVOLVED IN			1.90191408546949	0.00472819685898948
Cc06_g04220	GSCOC_T00023731001	A0A068UE84	Acylphosphatase	GO:0003998		1.9007391612849	3.2296692420822e-06
Cc10_g09080	GSCOC_T00034299001	A0A068TZS3	Predicted protein			1.89870419504487	8.72095820821918e-05
Cc01_g07640	GSCOC_T00015431001	A0A068V435	Transcription factor LHW	GO:0005634;GO:0003700;GO:0046983;GO:0010078;GO:0045893;GO:0010479;GO:0010089	AT2G27230	1.87252458786434	0.00695496982688132
Cc03_g02630	GSCOC_T00025919001	A0A068TSI8	Histidine-containing phosphotransfer protein 1	GO:0005737;GO:0005634;GO:0009927;GO:0043424;GO:0009736;GO:0009553;GO:0009825;GO:0000160	AT3G21510	1.85459900019778	0.00359248849971586
Cc07_g15730	GSCOC_T00036437001	A0A068TYR2	Putative RING/U-box superfamily protein	GO:0016021		1.85383262403068	0.000864508171993498
Cc07_g14950	GSCOC_T00036549001	A0A068TZW6	UDP-glycosyltransferase 85A3	GO:0008194		1.84819023433103	0.000397739151160232
Cc01_g05690	GSCOC_T00027381001	A0A068UJ09	Putative Magnesium transporter NIPA2	GO:0005769;GO:0016021;GO:0005886;GO:0015095	AT1G34470	1.84746124783864	6.44541619060507e-05
Cc10_g06630	GSCOC_T00034630001	A0A068U0I3	Hypothetical protein			1.84621815706221	8.3566257424114e-06
Cc09_g08710	GSCOC_T00020848001	A0A068UDF5	Putative Uncharacterized membrane protein C24H6.13	GO:0009941;GO:0016021;GO:0005886;GO:0009506;GO:0005774	AT1G30360	1.82955394957706	4.37879228255281e-06
Cc08_g08190	GSCOC_T00007252001	A0A068VC58	Hypothetical protein			1.82361141271008	0.00054527431604142
Cc10_g14960	GSCOC_T00033655001	A0A068USW5	Abscisic stress-ripening protein 3			1.81750880119086	5.24107186681207e-06
Cc07_g11230	GSCOC_T00037025001	A0A068U022	Putative Aspartic proteinase-like protein 1	GO:0004190	AT2G17760	1.81696168954845	0.000417436840185867
Cc06_g14500	GSCOC_T00041249001	A0A068U5F5	Putative unknown protein; BEST Arabidopsis thaliana protein match is			1.81289107162641	0.00014198074874162
Cc02_g34210	GSCOC_T00000657001	A0A068V9A9	Pre-mRNA-splicing factor SF2	GO:0003723	AT1G09140	1.80604164793691	0.000399181984040482
Cc02_g07800	GSCOC_T00029891001	A0A068TVN1	Protein kinase APK1A, chloroplastic	GO:0005524;GO:0004674	AT5G02290	1.80013585998133	0.00217950937252118
Cc08_g09040	GSCOC_T00017243001	A0A068V685	Aspartate aminotransferase, cytoplasmic	GO:0005777;GO:0009536;GO:0004069;GO:0030170;GO:0009058;GO:0006520;GO:0010150		1.79600744130267	0.00011055545080279
Cc11_g05170	GSCOC_T00020458001	A0A068UB37	Eukaryotic peptide chain release factor subunit 1-3	GO:0003747	AT3G26618	1.78337267119151	7.95384133896927e-05
Cc02_g22760	GSCOC_T00014954001	A0A068TNI5	Putative RING finger protein 170	GO:0016021;GO:0046872		1.7794042141926	0.00247286429584016
Cc02_g23930	GSCOC_T00015098001	A0A068TP63	Putative FUNCTIONS IN			1.76902384017508	3.93407508825244e-05
Cc07_g04530	GSCOC_T00039709001	A0A068U404	U3 small nucleolar ribonucleoprotein protein IMP3	GO:0019843		1.768447216027	0.00196871501064051
Cc03_g08930	GSCOC_T00042746001	A0A068V3S2	Hypothetical protein			1.75636234506188	3.15832482917044e-06
Cc02_g09110	GSCOC_T00029702001	A0A068TUN1	Putative Vacuolar protein sorting-associated protein 72 homolog	GO:0005634;GO:0043486;GO:0006355	AT2G36740	1.74167063248939	0.000834342029311789
Cc10_g03930	GSCOC_T00034998001	A0A068U197	Uncharacterized protein	GO:0016021;GO:0006351		1.74136969219259	0.000536140505326817
Cc01_g10540	GSCOC_T00024152001	A0A068UFT4	ABC transporter F family member 1	GO:0005524;GO:0016887	AT5G60790	1.7293370875044	8.30198683419126e-06
Cc02_g06810	GSCOC_T00039231001	A0A068UZT0	Nucleotide-diphospho-sugar transferases superfamily protein	GO:0016021;GO:0016757;GO:0006486		1.72916512227876	0.00314828432647622
Cc02_g13340	GSCOC_T00029170001	A0A068TW12	Putative Phosphoserine phosphatase 1		AT5G22620	1.72692654713097	0.00504570485458827
Cc11_g13020	GSCOC_T00032235001	A0A068TWB5	Putative uncharacterized protein	GO:0016021		1.72607331408958	0.000175910678291206
Cc10_g01050	GSCOC_T00024569001	A0A068UFK1	Mechanosensitive ion channel protein 8	GO:0016021;GO:0005886;GO:0055085		1.72148633026798	0.00633396068305288
Cc11_g09330	GSCOC_T00032750001	A0A3G1TL14	Probable fructose-bisphosphate aldolase 3, chloroplastic	GO:0004332;GO:0006096;GO:0004332;GO:0006096		1.71787961181689	0.000255310100467659
Cc07_g17900	GSCOC_T00018831001	A0A068U911	Putative Protein MKS1	GO:0005634;GO:0009870		1.71736256141011	0.00131607529952486
Cc09_g09470	GSCOC_T00017124001	A0A068V5P5	Putative RNA-binding protein	GO:0005634;GO:1990904;GO:0003723;GO:0006396		1.71378501951957	3.2683910074183e-08
Cc06_g05000	GSCOC_T00043029001	A0A068V629	F-box protein PP2-A15			1.70676728577475	0.00218349046548119
Cc06_g02650	GSCOC_T00023524001	A0A068UEJ4	Metallothionein-like protein 1	GO:0046872		1.70644178900372	0.00410031642816001
Cc10_g14970	GSCOC_T00033656001	A0A068UUV3	Hypothetical protein	GO:0016021		1.69904333488436	6.61571917533611e-06
Cc02_g10830	GSCOC_T00029486001	A0A068TV06	Hypothetical protein			1.69629373280904	0.00500365045077299
Cc06_g09060	GSCOC_T00041970001	A0A068U503	Probable histone H2A variant 3	GO:0000786;GO:0005634;GO:0003677;GO:0046982	AT1G52740	1.68833698447259	0.00141408972647439
Cc06_g09330	GSCOC_T00041928001	A0A068U492	Predicted protein			1.68752825342857	0.00290505806429065
Cc04_g04610	GSCOC_T00022191001	A0A068TPH6	Putative Calcineurin subunit B	GO:0005773;GO:0005509		1.68267646477567	9.64857148968616e-06
Cc04_g07130	GSCOC_T00022518001	A0A068TQW5	LOB domain-containing protein 41		AT3G02550	1.67828298874239	0.00016450923296865
Cc00_g08530	GSCOC_T00005637001	A0A068VEP1	Cellulose synthase-like protein G3	GO:0016021;GO:0016760;GO:0071555;GO:0030244		1.67609563254881	0.000175580514865297
Cc03_g09380	GSCOC_T00042677001	A0A068V3M4	Probable acyl-activating enzyme 16, chloroplastic	GO:0003824		1.67497616437778	0.000783916940994597
Cc03_g01740	GSCOC_T00025796001	A0A068TRB8	Hypoxia-responsive family protein	GO:0016021		1.67483911984694	0.001141824888361
Cc10_g13230	GSCOC_T00035324001	A0A068UWH2	F-box protein SKP2A			1.65773384554419	0.000942128036683797
Cc09_g00910	GSCOC_T00017883001	A0A068U831	Fumarylacetoacetase	GO:0004334;GO:0046872;GO:0006559;GO:0006572	AT1G12050	1.65501146689727	0.00107539641520082
Cc07_g08990	GSCOC_T00040292001	A0A068U3Q6	Putative Zinc-finger domain of monoamine-oxidase A repressor R1 protein	GO:0006355		1.64586273644966	0.00580910427679405
Cc10_g07460	GSCOC_T00034518001	A0A068TXJ1	Ethylene-responsive transcription factor RAP2-4	GO:0016021;GO:0005634;GO:0003677;GO:0003700	AT1G78080	1.64114630113723	0.000667919991016961
Cc02_g06800	GSCOC_T00039230001	A0A068V0L0	Putative Tetratricopeptide repeat (TPR)-like superfamily protein			1.63936344400818	0.000439575114460946
Cc04_g10090	GSCOC_T00042546001	A0A068V2X5	Putative unknown protein; BEST Arabidopsis thaliana protein match is			1.62361354167241	0.000245839326694573
Cc09_g10760	GSCOC_T00041005001	A0A068V1P8	Thioredoxin-like 1-1, chloroplastic	GO:0031969;GO:0009570;GO:0016671		1.62137497376231	7.0609834326028e-07
Cc03_g03680	GSCOC_T00026065001	A0A068TSW5	Heat shock 70 kDa protein 8	GO:0005524;GO:0009408		1.61773154187253	0.00730831650320765
Cc03_g05320	GSCOC_T00026281001	A0A068TV71	1-aminocyclopropane-1-carboxylate oxidase homolog 1	GO:0046872;GO:0016491		1.61696731819447	0.00934215431007316
Cc10_g10020	GSCOC_T00031467001	A0A068USX1	Transcription factor bHLH80	GO:0046983		1.61430126763803	0.000582686532765813
Cc02_g01030	GSCOC_T00019911001	A0A068U9Y6	Probable 6-phosphogluconolactonase 4, chloroplastic	GO:0017057;GO:0005975;GO:0006098		1.611484507346	0.00010012184798556
Cc01_g20420	GSCOC_T00015936001	A0A068U5T2	BTB/POZ domain-containing protein At1g03010			1.60930972551187	0.00524188354451377
Cc02_g38910	GSCOC_T00027792001	A0A068UMB0	Common plant regulatory factor 1	GO:0003700	AT2G46270	1.60113887403495	8.57900444021314e-07
Cc04_g03400	GSCOC_T00022034001	A0A068TQ61	Putative Late embryogenesis abundant (LEA) hydroxyproline-rich glycoprotein family	GO:0016021;GO:0009269		1.59870775503044	2.1630696516649e-06
Cc02_g21010	GSCOC_T00014732001	A0A068TMZ2	Peptidyl-prolyl cis-trans isomerase FKBP12	GO:0005829;GO:0003755	AT5G64350	1.59452967116511	0.00452994954762751
Cc02_g26980	GSCOC_T00025009001	A0A068UJC2	Callose synthase 1	GO:0000148;GO:0016021;GO:0003843;GO:0006075	AT5G13000	1.5889266968864	5.6489246340086e-05
Cc06_g14070	GSCOC_T00041304001	A0A068U313	Hypothetical protein			1.58401869814251	0.00170903575409193
Cc08_g15250	GSCOC_T00035452001	A0A068UU50	D111/G-patch domain-containing protein	GO:0003676		1.57227248736478	9.48704455041823e-06
Cc10_g01200	GSCOC_T00024587001	A0A068UFL6	Probable nucleoredoxin 2		AT4G31240	1.56458461365767	0.000427891421651422
Cc05_g13050	GSCOC_T00021110001	A0A068UCA3	Organic cation/carnitine transporter 4	GO:0016021;GO:0022857	AT3G20660	1.56445388166737	0.00389724444807221
Cc04_g06300	GSCOC_T00022416001	A0A068TQX1	Phosphoethanolamine N-methyltransferase 1	GO:0000234;GO:0006656		1.55798267785074	0.00127423009099083
Cc03_g00580	GSCOC_T00025641001	A0A068TS28	poly(A) polymerase 3	GO:0005737;GO:0016021;GO:0005634;GO:0005524;GO:0046872;GO:0004652;GO:0003723;GO:0006397;GO:0031123;GO:0043631	AT3G06560	1.55580435743954	0.00650685914025322
Cc06_g10370	GSCOC_T00041788001	A0A068U455	NADP-dependent malic enzyme	GO:0004471;GO:0046872;GO:0051287		1.55074545887366	0.0027886203865332
Cc04_g04820	GSCOC_T00022221001	A0A068TPR2	unknown protein; BEST Arabidopsis thaliana protein match is			1.5486456640693	0.000345929601946297
Cc01_g10510	GSCOC_T00024147001	A0A068UEX7	4-coumarate--CoA ligase-like 7	GO:0003824	AT4G05160	1.54688761050873	0.00161477404647717
Cc11_g04190	GSCOC_T00001330001	A0A068VB88	Putative polyol transporter 1	GO:0016021;GO:0022857	AT2G16120	1.54567768524185	0.00194044687727892
Cc10_g09690	GSCOC_T00031512001	A0A068UQN5	Patellin 1		AT1G72160	1.54477132582807	0.00176664111055425
Cc02_g14380	GSCOC_T00013846001	A0A068TLE9	Probable ATP-dependent RNA helicase DHX35	GO:0005524;GO:0004386	AT4G18465	1.54039680853488	0.0058426466447542
Cc07_g19590	GSCOC_T00018545001	A0A068UAC9	Actin-related protein 7	GO:0005634;GO:0009653;GO:0009793;GO:0010227		1.54033243966935	0.00229805310697364
Cc05_g07590	GSCOC_T00016753001	A0A068V7H9	Ethylene-responsive transcription factor 4	GO:0005634;GO:0003677;GO:0003700	AT5G44210	1.52828315994644	0.00342030206456777
Cc06_g14110	GSCOC_T00041300001	A0A068U3J2	tetraspanin8	GO:0016021	AT2G23810	1.5275312081561	0.0037966316229723
Cc06_g17870	GSCOC_T00040379001	A0A068V0R8	Uncharacterized protein At2g41620	GO:0016020;GO:0005643;GO:0017056;GO:0051028;GO:0015031		1.52708556415867	0.000224762836160093
Cc08_g08180	GSCOC_T00007253001	A0A068VCG3	Putative RING finger and CHY zinc finger domain-containing protein 1	GO:0008270		1.52364068282849	0.00329139586707966
Cc00_g22270	GSCOC_T00007436001	A0A068VJT0	Putative unknown protein; BEST Arabidopsis thaliana protein match is			1.52234095014105	0.00268971494467816
Cc03_g03210	GSCOC_T00026002001	A0A068TSH0	Putative Stem-specific protein TSJT1			1.5219601558915	0.000604217739808657
Cc06_g10600	GSCOC_T00041757001	A0A068U6M1	Putative uncharacterized protein			1.51930966533214	6.72978013332454e-06
Cc02_g16670	GSCOC_T00014161001	A0A068TNM4	Calcium-binding EF-hand family protein	GO:0005509		1.51826749532233	8.53413622605995e-05
Cc06_g17400	GSCOC_T00036386001	A0A068UWK4	Calcium-transporting ATPase 8, plasma membrane-type	GO:0016021;GO:0005524;GO:0005388		1.51772267794276	1.19742585083257e-05
Cc08_g11880	GSCOC_T00030561001	A0A068UNJ8	Ubiquitin carboxyl-terminal hydrolase isozyme L3	GO:0004843;GO:0006511	AT4G17510	1.51575656017869	0.00309223577906619
Cc02_g12490	GSCOC_T00029275001	A0A068TWA6	Anaphase-promoting complex subunit 4	GO:0005680;GO:0031145;GO:0009793;GO:0048481;GO:0030071	AT4G21530	1.51447370793362	0.00231518054534777
Cc00_g19070	GSCOC_T00000778001	A0A068VLF3	Aldehyde dehydrogenase family 7 member B4	GO:0016620	AT1G54100	1.51338793979837	0.000244333691697009
Cc03_g03960	GSCOC_T00026097001	A0A068TSR1	Putative Protein of unknown function (DUF581)	GO:0009749;GO:0042594;GO:0009744	AT3G22550	1.5059870652126	0.00726682912078144
Cc02_g38620	GSCOC_T00027839001	A0A068UKE5	Desiccation protectant protein Lea14 homolog	GO:0005829;GO:0050832;GO:0009269;GO:0009644;GO:0009611		1.5025111861878	5.11263700971353e-05
Cc02_g13370	GSCOC_T00029167001	A0A068TTB1	Callose synthase 11	GO:0000148;GO:0016021;GO:0003843;GO:0006075	AT4G04970	1.49933490398546	0.000750511917101217
Cc01_g13580	GSCOC_T00028328001	A0A068UKZ1	17.5 kDa class I heat shock protein		AT2G29500	1.48573351532351	6.54161518455032e-05
Cc07_g07320	GSCOC_T00040077001	A0A068U2V7	Putative Phytosulfokines 3	GO:0005576;GO:0008083;GO:0008283		1.47650272954493	0.0094431528607936
Cc05_g12340	GSCOC_T00021202001	A0A068UBF5	Putative Stem-specific protein TSJT1			1.47208015419813	0.00550505611706118
Cc05_g03280	GSCOC_T00033533001	A0A068USQ4	inhibitor-3	GO:0000164;GO:0004865;GO:0009793		1.4681263535309	0.000749594554737606
Cc02_g34190	GSCOC_T00000655001	A0A068V9P5	Translationally-controlled tumor protein homolog	GO:0032502;GO:0042127		1.46677787292188	0.000529973224448217
Cc07_g08180	GSCOC_T00040182001	A0A068U546	Putative uncharacterized protein	GO:0016021		1.46410384582444	0.00752970646061329
Cc06_g08960	GSCOC_T00041982001	A0A068U511	GTP-binding nuclear protein Ran-3	GO:0005634;GO:0005525;GO:0003924;GO:0006913;GO:0015031	AT5G55190	1.46239767213461	5.20777457011535e-06
Cc09_g00130	GSCOC_T00017988001	P54645	6-phosphofructokinase 2	GO:0005737;GO:0003872;GO:0005524;GO:0046872;GO:0006002	AT5G47810	1.46033766422028	3.24902519609904e-06
Cc07_g12400	GSCOC_T00036878001	A0A068U0Q8	Phospholipid/glycerol acyltransferase family protein	GO:0005886;GO:0071617;GO:0006650		1.44989861286422	0.00438761775578488
Cc02_g37860	GSCOC_T00027936001	A0A068UMJ1	unknown protein; FUNCTIONS IN			1.44907705502946	0.00663105566649843
Cc05_g03920	GSCOC_T00017313001	A0A068V6S0	Uncharacterized protein			1.44868492862677	0.000213114332506749
Cc06_g12450	GSCOC_T00041536001	A0A068U616	CONTAINS InterPro DOMAIN/s	GO:0005829		1.44692551891664	2.76943309581697e-05
Cc08_g11160	GSCOC_T00027110001	A0A068UIF3	unknown protein; CONTAINS InterPro DOMAIN/s			1.44540745621625	0.00121938772368758
Cc06_g08270	GSCOC_T00031152001	A0A068UQ89	Putative Umecyanin	GO:0016021;GO:0009055	AT5G20230	1.43731708579078	0.000196644764645615
Cc03_g09530	GSCOC_T00030935001	A0A068URN9	Probable UDP-N-acetylglucosamine--peptide N-acetylglucosaminyltransferase SEC	GO:0016757;GO:0006493		1.43730546267072	0.00121732483876483
Cc01_g15740	GSCOC_T00016527001	A0A068U6Q7	unknown protein; Has 30201 Blast hits to 17322 proteins in 780 species			1.43542402431947	0.00075467142574575
Cc06_g03260	GSCOC_T00023605001	A0A068UDR9	unknown protein; FUNCTIONS IN	GO:0016021		1.43232526977449	0.00511839834838622
Cc05_g16500	GSCOC_T00038551001	A0A068UYR3	Metal tolerance protein 10	GO:0016021;GO:0008324	AT1G16310	1.4140978489979	0.00768370631174368
Cc08_g14960	GSCOC_T00035413001	A0A068UUE2	Putative RING/U-box superfamily protein	GO:0008270	AT4G14220	1.41252625507266	1.24424633658361e-05
Cc05_g11280	GSCOC_T00021336001	A0A068UBX1	Putative Protein DJ-1		AT1G53280	1.40695933167707	0.00117333449585248
Cc03_g10240	GSCOC_T00031032001	A0A068UQ10	Probable aldo-keto reductase 2			1.40517440012512	0.00289812799801186
Cc08_g15940	GSCOC_T00035540001	A0A068UV58	Putative uncharacterized protein			1.39091525885553	0.00327363512022814
Cc08_g16290	GSCOC_T00035584001	A0A068UVC3	RNA polymerase II transcriptional coactivator KELP	GO:0003677;GO:0006355		1.38474673278222	0.00393619241026704
Cc07_g08220	GSCOC_T00040188001	A0A068U368	Putative Uncharacterized protein C20orf4 homolog			1.38337889761781	0.00100392485773066
Cc02_g38340	GSCOC_T00027875001	A0A068UJS8	Putative E3 ubiquitin-protein ligase RHA1B	GO:0016021;GO:0008270;GO:0009742;GO:1901371;GO:0010200		1.38159539948009	0.000168372846702147
Cc06_g05350	GSCOC_T00043081001	A0A068V663	Putative UPF0481 protein At3g47200	GO:0016021		1.38138050551818	0.000163054582270164
Cc10_g03110	GSCOC_T00024832001	A0A068UGC6	C2H2-like zinc finger protein		AT5G66730	1.38030159702029	0.000355223829790857
Cc06_g09930	GSCOC_T00041850001	A0A068U442	Putative RNA-binding protein-related	GO:0046872;GO:0003723;GO:0006355		1.37725371117521	0.00605563536085849
Cc05_g03980	GSCOC_T00031571001	A0A068UR37	Putative Epoxide hydrolase 2	GO:0003824		1.37685508072856	0.00341958319346222
Cc02_g12560	GSCOC_T00029268001	A0A068TTP0	Putative Probable ADP-ribosylation factor GTPase-activating protein AGD5	GO:0005096;GO:0046872	AT5G54310	1.3706125124337	0.00467468787350199
Cc10_g07790	GSCOC_T00034479001	A0A068TY42	Early-responsive to dehydration stress protein (ERD4)	GO:0016021	AT1G10090	1.37043265925199	0.00791294713558765
Cc08_g16020	GSCOC_T00035550001	A0A068UV35	Putative Leucine-rich repeat (LRR) family protein			1.36971514778336	0.00974451337238521
Cc02_g20060	GSCOC_T00014607001	A0A068TMS5	ethylene-dependent gravitropism-deficient and yellow-green-like 3	GO:0016021		1.36940715605047	0.00750414268601323
Cc02_g25830	GSCOC_T00028692001	A0A068ULE8	NADH dehydrogenase [ubiquinone] iron-sulfur protein 8, mitochondrial	GO:0016020;GO:0051539;GO:0016651		1.36756354124258	0.00537681634962254
Cc03_g03060	GSCOC_T00025981001	A0A068TSF5	Putative Probable serine incorporator	GO:0016021		1.36689172880147	6.44541619060507e-05
Cc08_g15210	GSCOC_T00035448001	A0A068UUH1	Putative Copper transport protein family	GO:0046872;GO:0030001		1.36154926688671	0.000213404203761025
Cc05_g12170	GSCOC_T00021224001	A0A068UCA1	Putative Pentatricopeptide repeat-containing protein At4g21705, mitochondrial			1.34706876114648	0.00398178945713886
Cc10_g08780	GSCOC_T00034341001	A0A068TZV4	Putative Protein phosphatase methylesterase 1	GO:0051723;GO:0006482		1.34293680544131	0.00074154320748662
Cc07_g08770	GSCOC_T00040266001	A0A068U3A6	Elongator complex protein 5	GO:0033588;GO:0002098		1.3418450591616	0.00062710127947247
Cc04_g06060	GSCOC_T00022386001	A0A068TPT6	Putative Protein TIFY 6B			1.34074173943734	0.00207581079247867
Cc04_g16010	GSCOC_T00042391001	A0A068V321	Putative uncharacterized protein			1.33443594557704	0.000433432998894087
Cc04_g04440	GSCOC_T00022169001	A0A068TS49	Protein kinase superfamily protein	GO:0005524;GO:0004672		1.33287545705364	0.00419403239649691
Cc08_g13260	GSCOC_T00030364001	A0A068UQJ6	Predicted protein	GO:0005886		1.31398078107142	0.00174470490758422
Cc02_g03630	GSCOC_T00020253001	A0A068UAR1	Carboxylesterase 1	GO:0016787		1.31268758348798	0.000708874128367893
Cc03_g02410	GSCOC_T00025885001	A0A068TS91	Sodium/hydrogen exchanger 2	GO:0016021;GO:0015385;GO:0006885	AT3G05030	1.31134236335389	0.00295710440355212
Cc02_g23190	GSCOC_T00015003001	A0A068TMP3	Putative uncharacterized protein	GO:0003723		1.31014157266832	0.00243446580508352
Cc03_g01310	GSCOC_T00025740001	A0A068TS00	Putative Major allergen Pru av 1	GO:0010427;GO:0004864;GO:0038023;GO:0009738;GO:0006952		1.3033920126967	0.0020770558595587
Cc07_g01620	GSCOC_T00039336001	A0A068U160	Putative Altered inheritance of mitochondria protein 32	GO:0016021		1.29986722082275	0.00177683097267793
Cc02_g06510	GSCOC_T00039189001	A0A068UZP1	Phosphoinositide phospholipase C 2	GO:0004435;GO:0035556;GO:0016042		1.29986334340636	0.00572550201537755
Cc01_g20210	GSCOC_T00015960001	A0A068U4R7	Putative Flavin-containing monooxygenase YUCCA10	GO:0050660;GO:0004499;GO:0050661		1.29984516693488	0.00610315559368132
Cc01_g16650	GSCOC_T00016415001	A0A068U5X9	RNA binding protein, putative			1.29727513879672	0.00307994925205863
Cc11_g00800	GSCOC_T00019749001	A0A068U9L6	RING-box protein 1a	GO:0008270		1.29486002019917	0.00656315601287385
Cc02_g02420	GSCOC_T00020097001	A0A068UBY2	unknown protein; BEST Arabidopsis thaliana protein match is			1.29407331380759	0.000807453672486017
Cc02_g11070	GSCOC_T00029457001	A0A068TU10	Cysteine proteinases superfamily protein			1.28930660143992	0.000336698281374255
Cc07_g00360	GSCOC_T00019106001	A0A068V9M0	FUNCTIONS IN			1.28702903555901	0.00901586355608589
Cc05_g08380	GSCOC_T00016856001	A0A068V5U4	Putative sequence-specific DNA binding transcription factors			1.2822537613846	0.00823984208995595
Cc06_g13640	GSCOC_T00041367001	A0A068U447	Xylose isomerase	GO:0046872;GO:0009045;GO:0042732	AT5G57655	1.27976154381931	7.78938910115804e-05
Cc06_g07740	GSCOC_T00031221001	A0A068UQ82	Putative Protein SRG1	GO:0046872;GO:0016491		1.27662676374256	0.000841377500319156
Cc05_g14630	GSCOC_T00038796001	A0A068V1K6	Probable serine/threonine-protein kinase WNK11	GO:0005524;GO:0004672	AT5G55560	1.26237988283179	0.00978156147944743
Cc10_g00810	GSCOC_T00024540001	A0A068UFS3	Cytokinin riboside 5'-monophosphate phosphoribohydrolase LOG5	GO:0016787;GO:0009691		1.25375082435047	0.00863061097544248
Cc02_g11810	GSCOC_T00029369001	A0A068TU06	Aldolase-type TIM barrel family protein	GO:0003824;GO:0010286;GO:0010608		1.24791400271986	0.00851118009898889
Cc06_g10300	GSCOC_T00041801001	A0A068U6P0	Putative Protein phosphatase 1 regulatory subunit pprA			1.24442069781777	0.00117333449585248
Cc02_g03740	GSCOC_T00020267001	A0A068U9Q9	DEAD-box ATP-dependent RNA helicase 7	GO:0005634;GO:0005524;GO:0004386;GO:0003723		1.24251715946551	0.000106772454185417
Cc06_g07300	GSCOC_T00031281001	A0A068UQ12	Putative Predicted protein	GO:0003723	AT3G62800	1.23569698809184	0.00161477404647717
Cc08_g00140	GSCOC_T00005569001	A0A068VE29	Hypothetical protein			1.23277632929647	5.53140935766976e-05
Cc00_g17460	GSCOC_T00008147001	A0A068VKY1	14-3-3-like protein			1.23064489965926	0.000376783480111802
Cc06_g20170	GSCOC_T00022926001	A0A068UCP6	Single-stranded nucleic acid binding R3H protein	GO:0016021;GO:0003676		1.2273599901758	0.000260041789525573
Cc05_g11550	GSCOC_T00021303001	A0A068UCP0	Transcription elongation factor 1 homolog	GO:0005634;GO:0046872		1.22578126789118	0.00371135877706041
Cc10_g12080	GSCOC_T00031893001	A0A068URN4	L-ascorbate peroxidase T, chloroplastic	GO:0020037;GO:0004601;GO:0006979		1.22568838031707	0.00233889311479596
Cc10_g04070	GSCOC_T00034982001	A0A1I9KKJ9	Putative ABSCISIC ACID-INSENSITIVE 5-like protein 5	GO:0003700;GO:0045893;GO:0003700;GO:0045893		1.2223317221189	0.00205566779239181
Cc02_g38840	GSCOC_T00027802001	A0A068UJP3	Eukaryotic translation initiation factor 1A	GO:0003743		1.21938566156495	0.00195221940087291
Cc05_g15830	GSCOC_T00038641001	A0A068V163	COP9 signalosome complex subunit 6a	GO:0008180;GO:0005737;GO:0000338;GO:1990641		1.21900312548978	0.006016254648858
Cc11_g06680	GSCOC_T00020692001	A0A068UAH9	Caffeoyl-CoA O-methyltransferase	GO:0008171		1.21836523355397	0.000864274606862842
Cc03_g15940	GSCOC_T00001655001	A0A068VEK4	Putative RNA-binding protein	GO:0005634;GO:1990904;GO:0003723;GO:0006396		1.21708743321798	0.00490038383961944
Cc01_g01860	GSCOC_T00019258001	A0A068V808	Putative Non-structural maintenance of chromosomes element 1 homolog	GO:0030915;GO:0006302		1.21487707010651	0.00721608655856097
Cc00_g09510	GSCOC_T00012931001	A0A068VFS3	hydroxyproline-rich glycoprotein family protein	GO:0005737;GO:0005634;GO:0030246;GO:0042742;GO:0090332		1.21379648366139	0.00977215162388973
Cc00_g10760	GSCOC_T00009011001	A0A068VG58	unknown protein; FUNCTIONS IN	GO:0016021		1.20368876780897	0.00101720737289151
Cc02_g34590	GSCOC_T00000716001	A0A068V9S5	Protein DEHYDRATION-INDUCED 19 homolog 3			1.20301794927087	0.00406717999208213
Cc07_g03400	GSCOC_T00039569001	A0A068U134	Hypothetical protein			1.19928125987652	0.000607316029255957
Cc08_g05860	GSCOC_T00024379001	A0A068UG37	Putative uncharacterized protein			1.1990639053112	0.000110421232878043
Cc05_g14470	GSCOC_T00038813001	A0A068UZV4	ENHANCED DOWNY MILDEW 2		AT5G55390	1.19839016804239	0.00297525233417828
Cc06_g17760	GSCOC_T00040364001	A0A068V0F5	Transcription initiation factor IIB-2	GO:0046872;GO:0017025;GO:0070897		1.19730409484889	0.00287810612375394
Cc11_g09610	GSCOC_T00032696001	A0A068TZC1	Putative Octicosapeptide/Phox/Bem1p family protein			1.19476069103872	0.00557639808780332
Cc10_g14010	GSCOC_T00002162001	A0A068VI79	Tetratricopeptide repeat (TPR)-like superfamily protein			1.19388657213226	0.00728490135134172
Cc10_g03070	GSCOC_T00024826001	A0A068UGY5	Protein kinase superfamily protein	GO:0005524;GO:0004672	AT3G17850	1.18628583550951	0.00944530474999307
Cc05_g12980	GSCOC_T00021118001	A0A068UBI0	Putative Uncharacterised conserved protein (UCP012943)	GO:0016021		1.18618641058927	0.00608747482564068
Cc06_g11740	GSCOC_T00041620001	A0A068U4Q4	Putative uncharacterized protein	GO:0046872;GO:0004722	AT1G72770	1.18117715816685	0.00568517642877185
Cc07_g11350	GSCOC_T00037012001	A0A068U0Y8	Putative DnaJ homolog subfamily C member 2	GO:0005634;GO:0003677		1.18101054213376	0.00447197422196625
Cc08_g16880	GSCOC_T00035664001	A0A068UXA4	unknown protein; Has 30201 Blast hits to 17322 proteins in 780 species	GO:0005737;GO:0005634;GO:0061015		1.17798681232845	0.00374391027371956
Cc08_g00430	GSCOC_T00038523001	A0A068UYB4	Putative Extended synaptotagmin-3	GO:0016021;GO:0008289;GO:0006869	AT1G05500	1.17578238228772	0.000874162697726345
Cc01_g06740	GSCOC_T00030073001	A0A068UPZ4	Putative Acyl-CoA N-acyltransferases (NAT) superfamily protein	GO:0008080		1.1712741930691	0.00433703072865799
Cc01_g13060	GSCOC_T00028266001	A0A068ULG0	Putative Scarecrow-like protein 14			1.16850052205044	0.00951352118825107
Cc04_g01060	GSCOC_T00021738001	A0A068TNB4	RNA-binding (RRM/RBD/RNP motifs) family protein	GO:0003723		1.15899419111766	0.00686424385996848
Cc02_g01100	GSCOC_T00019918001	A0A068U932	Putative ATPase family AAA domain-containing protein 1	GO:0016021;GO:0005524		1.15768470672769	0.00182697456976064
Cc05_g09440	GSCOC_T00021585001	A0A068UCD7	Mitogen-activated protein kinase 10	GO:0005524;GO:0004707	AT2G42880	1.15711318300502	0.00664748617105391
Cc05_g10110	GSCOC_T00021499001	A0A068UER1	Probable glutathione S-transferase			1.14899788150389	0.00282984828249796
Cc02_g10260	GSCOC_T00029547001	A0A068TUD3	Putative uncharacterized protein			1.14709789674175	0.00540298517196303
Cc00_g27050	GSCOC_T00012722001	A0A068VKY8	F-box protein SKIP1			1.14592676778379	0.0023190501745251
Cc11_g13440	GSCOC_T00032180001	A0A068TVI4	unknown protein; INVOLVED IN			1.14554092659306	0.00206524142899495
Cc06_g12220	GSCOC_T00041564001	A0A068U3J4	RING-box protein 1a	GO:0008270		1.14365876685392	0.00664748617105391
Cc09_g10450	GSCOC_T00041043001	A0A068V3R5	Putative Coiled-coil domain-containing protein 124 homolog			1.1436490305463	0.00356775645735517
Cc03_g03500	GSCOC_T00026040001	A0A068TRY8	Cyclin T1	GO:0042025;GO:0016538;GO:0006357		1.14272806907679	0.00511839834838622
Cc05_g14340	GSCOC_T00038830001	A0A068UZQ2	hydroxyproline-rich glycoprotein family protein			1.14003056675999	0.00626548395930181
Cc06_g18320	GSCOC_T00040442001	A0A068V0Z2	Putative uncharacterized protein			1.13707360677121	0.00313138524118616
Cc01_g13520	GSCOC_T00028320001	A0A068UKQ9	Putative Encodes a protein involved in salt tolerance, names SIS (Salt Induced Serine rich).			1.13013188387108	0.00199296713763901
Cc07_g04170	GSCOC_T00039669001	A0A068U1Y1	Putative Ribosome biogenesis protein WDR12 homolog	GO:0005730;GO:0005654;GO:0009506;GO:0030687;GO:0043021;GO:0000466;GO:0000463		1.12420025860039	0.00526508832285234
Cc05_g09150	GSCOC_T00002666001	Q9XGM1	V-type proton ATPase subunit D	GO:0042626;GO:0042626		1.11830731239049	0.00153747376395261
Cc03_g02850	GSCOC_T00025955001	A0A068TRS8	Putative Predicted protein	GO:0016021		1.11630238500527	0.00872036634049219
Cc02_g07830	GSCOC_T00029887001	A0A068TVW8	Protein of unknown function (DUF506) _x0001_			1.11369303851363	0.00225659801205297
Cc05_g14080	GSCOC_T00038863001	A0A068V1P3	Cell differentiation protein RCD1 homolog			1.11170290321604	0.000440038453364666
Cc03_g01130	GSCOC_T00025716001	A0A068TS66	AMSH-like ubiquitin thioesterase 3	GO:0016021;GO:0005770;GO:0006897;GO:0046907;GO:0090316;GO:0044090;GO:0071108;GO:0070536;GO:0007033		1.10581571993639	0.00289143034273886
Cc01_g10220	GSCOC_T00024105001	A0A068UFF4	Pheophorbide a oxygenase, chloroplastic	GO:0051537;GO:0010277	AT3G44880	1.10538088733276	0.00413094091786019
Cc10_g13150	GSCOC_T00035333001	A0A068UU85	Scarecrow-like protein 1	GO:0005634;GO:0003700	AT1G21450	1.10230379197823	0.000452148917101208
Cc02_g24350	GSCOC_T00002336001	A0A068VIK6	Vesicle-associated protein 1-3	GO:0005789;GO:0016021		1.07068499029147	0.00754809996089068
Cc08_g05870	GSCOC_T00024381001	A0A068UHY8	ABC transporter E family member 2	GO:0005524;GO:0016887		1.05990814245388	0.00333055749848778
Cc02_g12600	GSCOC_T00029263001	A0A068TUB7	Putative Quinone oxidoreductase PIG3	GO:0005829;GO:0016491		1.05234072543131	0.000986222330093919
Cc03_g00420	GSCOC_T00025623001	A0A068TTS5	Probable protein phosphatase 2C 49	GO:0046872;GO:0004722		1.05217944636615	0.00325712784714481
Cc10_g02230	GSCOC_T00024722001	A0A068UIK0	Putative Transcription initiation factor IIF subunit beta	GO:0005674;GO:0006367		1.04707986287264	0.00406717999208213
Cc01_g10100	GSCOC_T00024090001	A0A068UEL2	Vacuolar protein sorting-associated protein 41 homolog	GO:0030897;GO:0005770;GO:0009630;GO:0006886;GO:0035542;GO:0042144;GO:0016192		1.04590649358923	0.00436505623889837
Cc00_g04600	GSCOC_T00013605001	A0A068VBZ2	Putative E3 ubiquitin-protein ligase RNF167	GO:0000139;GO:0016021;GO:0000326		1.03067526288402	0.00545356400456667
Cc04_g04830	GSCOC_T00022222001	A0A068TQD7	30S ribosomal protein S15	GO:0005840;GO:0003735;GO:0006412		1.02737023473472	0.0079552067288223
Cc10_g10260	GSCOC_T00031435001	A0A068UQX6	SPla/RYanodine receptor (SPRY) domain-containing protein			1.02579885454243	0.00867973511664726
Cc07_g13450	GSCOC_T00036735001	A0A068U0D4	Putative RNA-binding (RRM/RBD/RNP motifs) family protein	GO:0003723		1.01578627725698	0.0018253879727208
Cc08_g15010	GSCOC_T00035422001	A0A068UUE9	DNA repair helicase XPB1	GO:0005524;GO:0003677;GO:0003678;GO:0006289;GO:0006367		1.01210051775002	0.00411996706269305
Cc05_g11730	GSCOC_T00021276001	A0A068UBS4	ARM repeat superfamily protein	GO:0009506;GO:0005774;GO:0043248		0.994930119561024	0.0094431528607936
Cc08_g06690	GSCOC_T00005857001	A0A068VE48	Dynamin-related protein 3A	GO:0005525;GO:0003924		0.985103125045152	0.00791294713558765
Cc09_g04650	GSCOC_T00017399001	A0A068U912	Domain of unknown function (DUF23)	GO:0016757		0.980494531110529	0.00920263612763433
Cc11_g10110	GSCOC_T00032622001	A0A068TZ48	unknown protein; FUNCTIONS IN			0.979707708802802	0.00302112447517236
Cc04_g01320	GSCOC_T00021775001	A0A068TNP8	Putative E3 Ubiquitin ligase family protein	GO:0009941;GO:0016021;GO:0004842;GO:0006996		0.979675323134181	0.00763155894276963
Cc00_g24230	GSCOC_T00003046001	A0A068VKF1	COP9 signalosome complex subunit 2	GO:0005737		0.978535828672046	0.00574724099316697
Cc04_g09100	GSCOC_T00022788001	A0A068TRQ9	Glutamate decarboxylase	GO:0009506;GO:0004351;GO:0030170;GO:0006536	AT5G17330	0.942298180387571	0.00941020537321863
Cc02_g16250	GSCOC_T00014107001	A0A068TL25	Putative Extended synaptotagmin-1	GO:0016021;GO:0008289;GO:0006869;GO:0016021		0.939311864032911	0.00820044638227109
Cc00_g04120	GSCOC_T00013742001	A0A068VBG6	Protein-tyrosine-phosphatase PTP1	GO:0004725		0.898547672884328	0.00917661020792056
