# Supplementary material for: Understanding the Impact of Drought in Coffea Genotypes: Transcriptomic Analysis Supports a Common High Resilience to Moderate Water Deficit but a Genotype Dependent Sensitivity to Severe Water Deficit
Source: MDPI journal article supplement (doi:10.3390/agronomy11112255), 2021-11-08
Supplement: s1 [file s1 › Table_S7.pdf]

**Table S7.** Regulation pattern of among differentially expressed genes (DEGs) related to photosynthesis and biochemical processes. in plants of *Coffea canephora* cv. Conilon Clone CL153 (CL153) and *C. arabica* cv. Icatu (Icatu) submitted to moderate water deficit (MWD) and severe water deficit (SWD) relative to the control, well-watered (WW) plants. DEGs were selected if annotated with the direct or respective child Gene Ontology (GO) terms “antioxidant activity” (GO:0016209) and/or “response to oxidative stress” (GO:0006979) [Antioxidant activity], “cellular respiration” (GO:0045333), “mitochondrion” (GO:0005739), “malate dehydrogenase activity” (GO:0016615), “pyruvate kinase activity” (GO:0004743) [Cellular respiration], “fatty acid metabolic process” (GO:0006631), LOX (GO:0004051, GO:0016702) [Lipid metabolism], “photosynthesis” (GO:0015979), “photosystem” (GO:0009521), “photosynthetic electron transport chain” (GO:0009767), “photorespiration” (GO:0009853) and/or “chlorophyll biosynthetic process” (GO:0015995) [Photosynthesis]. Red represent up-regulated DEGs and blue represent down-regulated DEGs.

| Gene ID              | Homolog   |                                              | log <sub>2</sub> FC |       |       |       |
|----------------------|-----------|----------------------------------------------|---------------------|-------|-------|-------|
|                      | Gene Name | Protein Name                                 | CL153               |       | Icatu |       |
|                      |           |                                              | MWD                 | SWD   | MWD   | SWD   |
| Antioxidant activity |           |                                              |                     |       |       |       |
| Cc06_g21030          |           | Peroxidase 44                                | 7,72                |       |       |       |
| Cc07_g14740          | AT2G22420 | Peroxidase 17                                | 4,48                | 5,41  |       |       |
| Cc00_g17550          | AT1G05260 | Peroxidase 3                                 | 4,2                 |       |       |       |
| Cc06_g12610          |           | Peroxiredoxin Q, chloroplastic               | -2,05               | -2,18 |       | -2,22 |
| Cc10_g15150          | AT1G71695 | Peroxidase 12                                |                     | 5,02  |       |       |
| Cc06_g03490          | AT3G09640 | L-ascorbate peroxidase 2, cytosolic          |                     | 3,65  |       |       |
| Cc00_g17550          | AT1G05260 | Peroxidase 3                                 |                     | 2,86  |       |       |
| Cc10_g12080          |           | L-ascorbate peroxidase T, chloroplastic      |                     | 1,2   |       | 1,23  |
| Cc04_g06610          |           | alpha dioxygenase                            |                     | -1,36 |       |       |
| Cc08_g00640          |           | Putative L-ascorbate peroxidase 2, cytosolic |                     | -1,38 |       |       |
| Cc09_g01700          | AT4G21960 | Peroxidase 42                                |                     | -1,92 | -3,08 | -5,57 |
| Cc06_g00570          | AT1G14550 | Cationic peroxidase 1                        |                     | -2,21 | -4,57 |       |
| Cc07_g02590          | AT5G40150 | Peroxidase 63                                |                     | -2,51 | -3,05 | -2,14 |
| Cc02_g21960          |           | Peroxidase 43                                |                     | -2,57 | -2,87 | -4,08 |

|             |           |                                                                  |       |       |        |
|-------------|-----------|------------------------------------------------------------------|-------|-------|--------|
| Cc05_g08480 | AT5G05340 | Peroxidase 4                                                     | -2,59 | -2,48 | -5,46  |
| Cc07_g06870 | AT5G67400 | Peroxidase 73                                                    | -2,62 | -3,88 |        |
| Cc06_g13090 | AT2G18980 | Peroxidase 16                                                    | -3,35 |       |        |
| Cc07_g11210 | AT5G42180 | Peroxidase 64                                                    | -4,36 | -9,85 | -10,37 |
| Cc06_g08460 |           | Peroxidase 25                                                    |       | -2,71 |        |
| Cc01_g15110 |           | Peroxidase 4                                                     |       | -3,55 |        |
| Cc00_g00940 |           | Peroxidase 47                                                    |       | -5,09 |        |
| Cc07_g17340 |           | Peroxidase 5                                                     |       | -6,87 |        |
| Cc07_g02500 | AT3G01420 | Peroxidase superfamily protein                                   |       |       | 2,94   |
| Cc10_g06720 | AT4G09010 | Thylakoid lumenal 29 kDa protein. chloroplastic                  |       |       | -2,35  |
| Cc01_g10280 | AT2G28190 | Superoxide dismutase [Cu-Zn], chloroplastic                      |       |       | -2,38  |
| Cc03_g02460 | AT1G08830 | Superoxide dismutase [Cu-Zn]                                     |       |       | -2,61  |
| Cc02_g03550 |           | Peroxidase 66                                                    |       |       | -9,1   |
| Cc07_g11210 | AT5G42180 | Peroxidase 64                                                    |       |       |        |
| Cc06_g08070 | AT3G57520 | Probable galactinol--sucrose galactosyltransferase 6             | 3,52  | 2,84  | 2,47   |
| Cc04_g04320 |           | Putative Tetratricopeptide repeat (TPR)-like superfamily protein | -1,3  |       |        |
| Cc03_g02760 | AT4G21860 | Peptide methionine sulfoxide reductase B3, chloroplastic         | -2,68 | -3,5  |        |
| Cc01_g04080 |           | Putative Long-chain-fatty-acid--AMP ligase FadD28                |       | 5     |        |
| Cc10_g00570 | AT4G35090 | Catalase                                                         |       | 3,32  |        |
| Cc09_g02320 |           | Elongator complex protein 6                                      |       | 1,62  | 1,96   |
| Cc04_g03820 |           | Putative Monoglyceride lipase                                    | -1,53 | -1,5  | -1,75  |
| Cc11_g10330 |           | Putative uncharacterized protein                                 | -1,67 |       |        |
| Cc00_g20670 | AT5G43750 | NAD(P)H dehydrogenase 18                                         | -1,72 |       |        |
| Cc08_g11220 |           | peptidyl-prolyl cis-trans isomerases                             | -2,92 |       | -2,65  |
| Cc07_g13330 |           | 15.7 kDa heat shock protein. peroxisomal                         |       | 2,59  |        |
| Cc07_g02770 | AT3G28340 | Probable galacturonosyltransferase-like 9                        |       | 3,86  |        |
| Cc06_g16900 |           | GTP-binding protein TypA/BipA homolog                            |       |       | -2,09  |

| Cellular respiration |           |                                                                           |       |        |       |
|----------------------|-----------|---------------------------------------------------------------------------|-------|--------|-------|
| Cc05_g11180          | AT3G14940 | Phosphoenolpyruvate carboxylase                                           | -3,82 | -3,7   | -4,08 |
| Cc04_g10080          | AT5G03860 | Malate synthase, glyoxysomal                                              | 2,79  |        |       |
| Cc03_g02560          | AT5G18800 | NADH dehydrogenase [ubiquinone] 1 alpha subcomplex subunit 8-B            | -1,5  |        |       |
| Cc11_g10810          | AT1G68750 | Phosphoenolpyruvate carboxylase 4                                         | -1,66 |        | -1,79 |
| Cc06_g20970          |           | Succinate dehydrogenase [ubiquinone] iron-sulfur subunit 2, mitochondrial | -1,25 |        |       |
| Cc06_g13830          | AT2G18700 | Probable alpha.alpha-trehalose-phosphate synthase [UDP-forming] 11        | 3,01  | 4      | 2,57  |
| Cc03_g02940          | AT5G35630 | Glutamine synthetase leaf isozyme, chloroplastic                          | -1,66 | -1,9   | -1,83 |
| Cc09_g01490          | AT1G11860 | Aminomethyltransferase, mitochondrial                                     | -2,81 | -3,36  | -3,16 |
| Cc08_g01750          | AT4G28060 | Cytochrome c oxidase subunit 6b-3                                         | -5,71 | -5,32  |       |
| Cc04_g15520          |           | Putative Mitochondrial outer membrane protein porin of 36 kDa             | -5,75 | -10,93 |       |
| Cc07_g05130          | AT2G23790 | Putative Protein of unknown function (DUF607)                             |       | 2,94   |       |
| Cc11_g17430          | AT5G50850 | Pyruvate dehydrogenase E1 component subunit beta. mitochondrial           |       | 2,83   |       |
| Cc06_g11140          | AT4G26180 | Putative Graves disease carrier protein                                   |       | 2,19   |       |
| Cc02_g00270          |           | Putative ATPase family AAA domain-containing protein 3-A                  |       | 2,02   |       |
| Cc00_g21200          | AT3G06500 | Plant neutral invertase family protein                                    |       | 1,94   |       |
| Cc02_g21470          | AT5G09420 | Outer envelope protein 64, mitochondrial                                  |       | 1,83   |       |
| Cc07_g07860          | AT5G09590 | Heat shock 70 kDa protein, mitochondrial                                  |       | 1,83   |       |
| Cc02_g09270          |           | Mitochondrial glycoprotein family protein                                 |       | 1,7    |       |
| Cc02_g27440          | AT5G48030 | Putative Chaperone protein dnaJ 1, mitochondrial                          |       | 1,65   |       |
| Cc08_g05000          |           | Anamorsin homolog                                                         |       | 1,56   |       |
| Cc09_g03060          |           | Solanesyl diphosphate synthase 3, chloroplastic/mitochondrial             |       | 1,51   |       |
| Cc05_g13790          |           | CRS2-associated factor 2, mitochondrial                                   |       | 1,5    |       |
| Cc09_g01900          |           | Putative Cardiolipin synthase                                             |       | 1,45   |       |
| Cc05_g14280          |           | Co-chaperone GrpE family protein                                          |       | 1,41   |       |
| Cc11_g00600          |           | Dihydroorotate dehydrogenase (quinone), mitochondrial                     |       | 1,37   |       |
| Cc04_g15410          |           | Probable aldehyde dehydrogenase                                           |       | 1,32   |       |

|                         |           |                                                                          |       |       |       |
|-------------------------|-----------|--------------------------------------------------------------------------|-------|-------|-------|
| Cc11_g14960             |           | Transaldolase                                                            |       | 1,3   |       |
| Cc03_g07290             |           | 3-ketoacyl-CoA thiolase 2. peroxisomal                                   |       | 1,1   |       |
| Cc06_g12530             |           | 20 kDa chaperonin. chloroplastic                                         |       | -1,19 |       |
| Cc07_g14260             | AT2G22500 | Putative Probable mitochondrial 2-oxoglutarate/malate carrier protein    |       | -1,79 |       |
| Cc01_g13710             | AT5G58970 | Putative Mitochondrial uncoupling protein 3                              |       | -1,9  |       |
| Cc04_g07800             | AT5G23060 | Calcium sensing receptor, chloroplastic                                  | -2,06 | -1,47 |       |
| Cc09_g06160             | AT5G14780 | Formate dehydrogenase, mitochondrial                                     |       | -2,45 |       |
| Cc04_g04190             |           | Putative Pentatricopeptide repeat-containing protein Atlg52620           |       |       | 3,32  |
| Cc11_g04410             |           | Pyridine nucleotide-disulfide oxidoreductase domain-containing protein 2 |       |       | 1,14  |
| Cc00_g08170             |           | Putative Heat shock protein 90                                           |       |       | 1     |
| Cc07_g01900             |           | Cytochrome c oxidase subunit 5C                                          |       |       | 3,36  |
| Cc06_g11140             | AT4G26180 | Putative Graves disease carrier protein                                  |       |       | 2,36  |
| Cc01_g15620             |           | Protein of unknown function (DUF607)                                     |       |       | -1,49 |
| Cc11_g15490             |           | Alpha-glucan water dikinase, chloroplastic                               |       |       | -1,73 |
| Cc08_g02390             | AT1G32470 | Glycine cleavage system H protein, mitochondrial                         |       |       | -2,2  |
| Cc06_g10370             |           | NADP-dependent malic enzyme                                              |       |       | 1,55  |
| Cc02_g20400             | AT2G22780 | Malate dehydrogenase, glyoxysomal                                        |       |       | -2,41 |
| Cc02_g20400             | AT2G22780 | Malate dehydrogenase, glyoxysomal                                        | -2,25 |       |       |
| Cc04_g09680             |           | Pyruvate kinase, cytosolic isozyme                                       | -6,34 |       |       |
| Cc02_g02100             |           | Plastidial pyruvate kinase 2                                             | 1,46  |       |       |
| Cc11_g00360             | AT4G26390 | Pyruvate kinase, cytosolic isozyme                                       | -1,42 |       |       |
| Cc08_g02330             |           | Pyruvate kinase isozyme G, chloroplastic                                 | -1,24 |       |       |
| <b>Lipid metabolism</b> |           |                                                                          |       |       |       |
| Cc11_g10180             | AT1G68530 | 3-ketoacyl-CoA synthase 6                                                | 8,39  | 9,65  |       |
| Cc06_g09070             | AT2G26640 | 3-ketoacyl-CoA synthase 11                                               | 2,35  | 3,47  |       |
| Cc05_g07170             |           | Two pore calcium channel protein 1A                                      | 1,84  |       |       |
| Cc01_g16760             | AT3G25110 | Oleoyl-acyl carrier protein thioesterase, chloroplastic (Fragment)       | -1,34 |       |       |

|             |           |                                                                          |       |       |       |
|-------------|-----------|--------------------------------------------------------------------------|-------|-------|-------|
| Cc02_g39890 | AT1G01120 | 3-ketoacyl-CoA synthase 1                                                | -1,38 |       |       |
| Cc04_g04380 | AT3G15850 | Palmitoyl-monogalactosyldiacylglycerol delta-7 desaturase, chloroplastic | -1,64 | -1,18 |       |
| Cc08_g07790 | AT2G26250 | 3-ketoacyl-CoA synthase 10                                               | -2,06 |       |       |
| Cc11_g17510 | AT1G54630 | Acyl carrier protein 1, chloroplastic                                    | -2,7  |       |       |
| Cc07_g08840 | AT1G68530 | 3-ketoacyl-CoA synthase 6                                                | -3,07 |       |       |
| Cc03_g04570 | AT1G04220 | 3-ketoacyl-CoA synthase 17                                               | -3,84 | -4,6  |       |
| Cc08_g11520 | AT4G24510 | Putative HXXXD-type acyl-transferase family protein                      | -4,34 |       |       |
| Cc11_g10190 | AT1G68530 | 3-ketoacyl-CoA synthase 6                                                | -5,18 |       |       |
| Cc00_g14020 | AT5G04530 | 3-ketoacyl-CoA synthase 21                                               | -5,66 |       |       |
| Cc04_g01940 | AT1G72970 | Protein HOTHEAD                                                          | -9,61 | -5,86 |       |
| Cc02_g22540 |           | 3-ketoacyl-CoA synthase 7                                                |       | 5,1   |       |
| Cc03_g04540 | AT1G04220 | 3-ketoacyl-CoA synthase 17                                               |       | 4,19  |       |
| Cc02_g37010 | AT2G45670 | Putative Lysophosphatidylcholine acyltransferase 2                       |       | 1,48  |       |
| Cc00_g17690 |           | rhomboid-like protein 11                                                 |       | 1,28  |       |
| Cc01_g16760 | AT3G25110 | Oleoyl-acyl carrier protein thioesterase, chloroplastic (Fragment)       | -1,53 |       | -2,62 |
| Cc02_g39890 | AT1G01120 | 3-ketoacyl-CoA synthase 1                                                | -1,9  |       | -1,87 |
| Cc01_g19410 | AT3G63170 | Chalcone-flavanone isomerase family protein                              | -1,96 |       |       |
| Cc11_g17510 | AT1G54630 | Acyl carrier protein 1, chloroplastic                                    | -2,38 |       | -4,62 |
| Cc01_g16740 |           | Oleoyl-acyl carrier protein thioesterase, chloroplastic (Fragment)       | -2,61 |       |       |
| Cc08_g07790 | AT2G26250 | 3-ketoacyl-CoA synthase 10                                               | -2,64 |       | -1,79 |
| Cc11_g10190 | AT1G68530 | 3-ketoacyl-CoA synthase 6                                                | -4,69 | -2,16 |       |
| Cc07_g08840 | AT1G68530 | 3-ketoacyl-CoA synthase 6                                                | -5,26 | -1,75 |       |
| Cc00_g14020 | AT5G04530 | 3-ketoacyl-CoA synthase 21                                               | -6,77 | -3,62 |       |
| Cc08_g11520 | AT4G24510 | Putative HXXXD-type acyl-transferase family protein                      | -9,84 |       | -6,68 |
| Cc07_g08840 | AT1G68530 | 3-ketoacyl-CoA synthase 6                                                |       |       | -5,96 |
| Cc11_g10190 | AT1G68530 | 3-ketoacyl-CoA synthase 6                                                |       |       | -7,39 |
| Cc00_g14020 | AT5G04530 | 3-ketoacyl-CoA synthase 21                                               |       |       | -8,88 |
| Cc07_g03350 |           | Myb-related protein 306                                                  |       | -4,66 | -4,11 |

|                       |           |                                                                                 |       |       |       |       |
|-----------------------|-----------|---------------------------------------------------------------------------------|-------|-------|-------|-------|
| Cc10_g05850           |           | Acetyl-CoA carboxylase 1                                                        |       |       |       | -1,68 |
| Cc11_g01680           |           | 3-ketoacyl-CoA synthase 11                                                      |       |       |       | -2,05 |
| Cc07_g14130           |           | 3-hydroxyacyl-CoA dehydratase PASTICCINO 2                                      |       |       |       | -2,71 |
| Cc03_g04550           |           | 3-ketoacyl-CoA synthase 17                                                      |       |       |       | -6,75 |
| Cc02_g33320           | AT1G55020 | Probable linoleate 9S-lipoxygenase 5                                            | 3,82  |       | -1,98 | -4,25 |
| Cc03_g03580           | AT3G22400 | Linoleate 9S-lipoxygenase 5, chloroplastic                                      |       |       |       | -2,98 |
| Cc02_g13400           |           | Linoleate 13S-lipoxygenase 3-1, chloroplastic                                   |       |       |       | -7,8  |
| Cc01_g04060           | AT3G45140 | Linoleate 13S-lipoxygenase 2-1, chloroplastic                                   |       | -3,37 |       |       |
| Cc02_g33790           | AT1G55020 | Probable linoleate 9S-lipoxygenase 5                                            |       | 3,07  |       |       |
| <b>Photosynthesis</b> |           |                                                                                 |       |       |       |       |
| Cc00_g15710           | AT1G67090 | Ribulose biphosphate carboxylase small chain SSU11A, chloroplastic              | -2,23 | -2,76 |       | -2,39 |
| Cc10_g12590           |           | Photosystem I reaction center subunit N, chloroplastic                          |       | -3,91 |       | -3,04 |
| Cc06_g22740           | AT3G56940 | Magnesium-protoporphyrin IX monomethyl ester [oxidative] cyclase, chloroplastic |       | -3,54 |       | -2,96 |
| Cc04_g03050           | AT3G16140 | Photosystem I reaction center subunit VI, chloroplastic                         |       | -2,34 |       | -2,45 |
| Cc09_g08490           | AT1G30380 | Photosystem I reaction center subunit psaK, chloroplastic                       |       | -5,08 |       | -2,4  |
| Cc07_g18500           | AT5G45930 | Magnesium-chelatase subunit chlI, chloroplastic                                 |       |       |       | -2,28 |
| Cc08_g01300           |           | photosystem II subunit X                                                        |       | -3,99 |       | -2,28 |
| Cc01_g15890           | AT4G12800 | Photosystem I reaction center subunit XI, chloroplastic                         |       | -2,69 |       | -2,08 |
| Cc10_g14740           | AT1G43670 | Fructose-1.6-bisphosphatase, cytosolic                                          |       |       |       | -2,23 |
| Cc03_g03590           | AT1G03130 | Photosystem I reaction center subunit II, chloroplastic                         |       | -2,7  |       | -1,94 |
| Cc01_g18800           | AT2G30570 | Photosystem II reaction center W protein, chloroplastic                         |       | -2,97 |       | -2,11 |
| Cc02_g09420           |           | Unknown protein                                                                 |       | -3,17 |       | -2,09 |
| Cc11_g16230           | AT1G67740 | Photosystem II core complex proteins psbY, chloroplastic                        |       | -2,84 |       | -1,87 |
| Cc01_g06000           |           | Magnesium-chelatase subunit chlD, chloroplastic                                 |       |       |       | -1,3  |
| Cc01_g17500           | AT2G20260 | Photosystem I reaction center subunit IV A, chloroplastic                       |       | -2,09 |       | -1,5  |
| Cc05_g06850           | AT1G03630 | Protochlorophyllide reductase, chloroplastic                                    |       | -2,7  |       | -1,63 |
| Cc05_g12370           | AT5G54190 | Protochlorophyllide reductase, chloroplastic                                    |       | -2,36 |       |       |

|             |           |                                                             |       |       |       |
|-------------|-----------|-------------------------------------------------------------|-------|-------|-------|
| Cc10_g04190 | AT1G45474 | Chlorophyll a-b binding protein P4, chloroplastic           | -3,96 | -5,37 | -5,13 |
| Cc10_g16210 | AT4G10340 | Chlorophyll a-b binding protein CP26, chloroplastic         |       | -4,15 | -3,24 |
| Cc09_g09500 | AT2G05100 | Chlorophyll a-b binding protein 36, chloroplastic           |       | -3,31 | -2,42 |
| Cc09_g09010 |           | Chlorophyll a-b binding protein 21, chloroplastic           |       |       | -3,8  |
| Cc02_g21720 | AT1G45474 | Chlorophyll a-b binding protein CP24 10A, chloroplastic     |       | -3,58 | -2,76 |
| Cc07_g00260 | AT5G54270 | Chlorophyll a-b binding protein 13, chloroplastic           |       |       | -4,01 |
| Cc09_g09020 | AT1G29930 | Chlorophyll a-b binding protein 21, chloroplastic           |       | -5,71 | -2,8  |
| Cc05_g09650 | AT1G29930 | Chlorophyll a-b binding protein 1, chloroplastic            |       |       | -6,82 |
| Cc09_g02010 | AT3G54890 | Chlorophyll a-b binding protein 6A, chloroplastic           |       | -3,99 | -2,33 |
| Cc04_g16410 | AT3G47470 | Chlorophyll a-b binding protein 4, chloroplastic            |       | -5,78 | -2,81 |
| Cc11_g16910 | AT3G61470 | Chlorophyll a-b binding protein, chloroplastic              |       | -3    | -1,5  |
| Cc05_g09930 | AT1G61520 | Chlorophyll a-b binding protein 8, chloroplastic            |       | -2,89 | -1,7  |
| Cc06_g01460 | AT3G08940 | Chlorophyll a-b binding protein CP29.2, chloroplastic       |       | -3,06 | -1,72 |
| Cc09_g09030 | AT1G29930 | Chlorophyll a-b binding protein 21, chloroplastic           |       | -4,48 |       |
| Cc05_g12720 | AT5G54270 | Chlorophyll a-b binding protein 13, chloroplastic           |       | -5,28 | -3,52 |
| Cc01_g17770 |           | Photosystem II reaction center PSB28 protein. chloroplastic | -2,08 |       |       |
| Cc02_g35130 | AT4G15510 | PsbP domain-containing protein 1. chloroplastic             | -1,59 | -1,83 | -1,77 |
| Cc02_g11770 | AT4G05180 | Oxygen-evolving enhancer protein 3-2. chloroplastic         |       | -4,19 | -4,44 |
| Cc05_g00840 | AT1G06680 | Oxygen-evolving enhancer protein 2. chloroplastic           |       | -2,47 | -2,12 |
| Cc05_g15930 | AT1G79040 | Photosystem II 10 kDa polypeptide. chloroplastic            |       | -2,56 | -2,05 |
| Cc07_g05350 | AT3G50820 | Oxygen-evolving enhancer protein 1. chloroplastic           |       | -2,07 | -1,86 |
| Cc11_g04720 |           | PsbP-like protein 1. chloroplastic                          |       |       | -2,24 |
| Cc01_g17770 |           | Photosystem II reaction center PSB28 protein. chloroplastic |       | -1,94 | -1,92 |
| Cc02_g31060 | AT3G05410 | Photosystem II reaction center PsbP family protein          |       | -2,05 | -1,74 |
| Cc02_g33910 | AT2G28605 | Predicted protein (Fragment)                                |       |       | -1,71 |
| Cc02_g32670 | AT1G54780 | UPF0603 protein At1g54780. chloroplastic                    | -1,94 | -2,38 | -1,55 |
| Cc07_g02170 | AT3G27925 | Protease Do-like 1. chloroplastic                           |       | -1,57 | -1,56 |
| Cc05_g11580 |           | Putative Predicted protein                                  | -2,96 | -2,7  | -3,63 |

|             |           |                                                    |       |       |  |       |
|-------------|-----------|----------------------------------------------------|-------|-------|--|-------|
| Cc05_g06070 | AT2G20890 | Protein THYLAKOID FORMATION1. chloroplastic        |       | -2,22 |  | -1,41 |
| Cc05_g06750 | AT1G03600 | Thylakoid lumenal protein At1g03610. chloroplastic |       | -2,19 |  | -1,63 |
| Cc08_g05240 | AT4G19100 | Protein PAM68. chloroplastic                       |       | -2,27 |  |       |
| Cc01_g08780 | AT1G08380 | photosystem I subunit O                            |       | -4,74 |  | -2,83 |
| Cc04_g03080 |           | Putative Glyoxylate reductase                      |       | -1,28 |  |       |
| Cc06_g17100 | AT5G13630 | Putative Magnesium-chelatase subunit H             |       | -3,35 |  | -3    |
| Cc05_g12410 |           | Putative COP1-interacting protein 7                |       |       |  | -1,7  |
| Cc01_g19080 | AT1G19670 | Putative Chlorophyllase-1                          | -4,39 | -6,7  |  | -3,88 |
| Cc10_g00150 |           | Hypothetical protein                               |       | -1,4  |  |       |
