# Supplementary material for: Understanding the Impact of Drought in Coffea Genotypes: Transcriptomic Analysis Supports a Common High Resilience to Moderate Water Deficit but a Genotype Dependent Sensitivity to Severe Water Deficit
Source: MDPI journal article supplement (doi:10.3390/agronomy11112255), 2021-11-08
Supplement: s1 [file s1 › Table_S8.pdf]

**Table S8.** Regulation pattern of transcription factors (TF) among differentially expressed genes (DEGs). between plants of *Coffea canephora* cv. Conilon Clone CL153 (CL153) and *C. arabica* cv. Icatu (Icatu) submitted to mild water deficit (MWD) and severe water deficit (SWD) relative to the control, well-watered (WW) plants. Transcription Factors (TFs) were found among differentially expressed genes (DEGs) responsive to drought, according to DroughtDB (highlighted with\*) or if annotated with the Gene Ontology (GO) term “DNA-binding transcription factor” (GO:0003700). Red: up-regulated DEGs. Blue: down-regulated DEGs.

| Gene ID     | Homolog   | Protein name                                                | log <sub>2</sub> FC |       |       |       |
|-------------|-----------|-------------------------------------------------------------|---------------------|-------|-------|-------|
|             |           |                                                             | CL153               |       | Icatu |       |
|             |           |                                                             | MWD                 | SWD   | MWD   | SWD   |
| Cc08_g13960 |           | Dehydration-responsive element-binding protein 1A (DREB1A)* | 8.44                | 7.65  |       |       |
| Cc05_g12500 |           | NAC domain-containing protein 55 (NAC055)*                  | 5.44                | 6.06  |       |       |
| Cc04_g04250 |           | Ethylene-responsive transcription factor (WIN1)*            |                     | -7.79 |       | -8.96 |
| Cc06_g17200 |           | Transcription factor (MYB60)*                               |                     | -2.91 |       | -1.95 |
| Cc06_g06960 |           | ABC transporter G family member 22 (ABCG22)*                |                     | -2.68 |       |       |
| Cc02_g03420 | AT5G52020 | Putative Ethylene-responsive transcription factor ERF027    | 10.11               | 9.72  |       |       |
| Cc08_g13960 | AT4G25480 | Putative Dehydration-responsive element-binding protein 1D  | 8.44                | 7.65  |       |       |
| Cc01_g18390 | AT3G23240 | Ethylene-responsive transcription factor 1B                 | 7.40                | 8.68  |       |       |
| Cc07_g16730 | AT5G64750 | DNA binding protein. putative                               | 6.95                | 7.87  |       |       |
| Cc10_g15100 | AT5G64750 | Putative uncharacterized protein                            | 4.97                | 6.40  |       | 3.64  |
| Cc01_g19020 | AT3G22830 | Heat stress transcription factor A-6b                       | 3.66                | 2.52  | 3.04  | 2.23  |
| Cc07_g07330 | AT1G75390 | Putative basic leucine-zipper 6                             | 3.61                |       |       |       |
| Cc06_g16930 | AT1G30500 | Transcription factor                                        | 3.45                | 3.35  |       | 3.43  |
| Cc08_g09520 | AT5G11590 | Dehydration-responsive element-binding protein 3            | 3.39                | 2.10  |       |       |
| Cc04_g05080 | AT1G80840 | Probable WRKY transcription factor 40                       | 3.37                | 2.14  |       |       |
| Cc07_g13110 | AT3G23240 | Putative Ethylene-responsive transcription factor 15        | 3.26                | 3.24  | 6.28  | 6.55  |
| Cc05_g07590 | AT5G44210 | Ethylene-responsive transcription factor 4                  | 2.96                | 2.44  |       | 1.53  |
| Cc02_g13700 | AT5G44210 | Putative Ethylene-responsive transcription factor 4         | 2.92                | 3.18  |       | 2.13  |
| Cc09_g01430 | AT1G62300 | WRKY transcription factor 6                                 | 2.81                | 3.22  |       |       |

|             |           |                                                            |       |       |       |       |
|-------------|-----------|------------------------------------------------------------|-------|-------|-------|-------|
| Cc06_g09660 | AT3G24520 | Putative uncharacterized protein                           | 2.77  | 3.34  |       |       |
| Cc09_g09190 |           | Putative Probable WRKY transcription factor 28             | 2.40  |       |       |       |
| Cc02_g38910 | AT2G46270 | Common plant regulatory factor 1                           | 1.99  | 1.60  |       | 1.60  |
| Cc08_g10810 | AT2G26150 | Heat shock factor protein HSF30                            | 1.92  | 2.39  |       |       |
| Cc01_g14950 | AT2G38470 | Putative Probable WRKY transcription factor 3              | 1.52  | 1.35  |       |       |
| Cc10_g04070 |           | Putative ABSCISIC ACID-INSENSITIVE 5-like protein 5        | 1.50  |       |       | 1.22  |
| Cc02_g18860 |           | Putative ABSCISIC ACID-INSENSITIVE 5-like protein 6        | 1.47  | 1.61  |       |       |
| Cc11_g12210 |           | Putative Probable WRKY transcription factor 57             | -1.33 |       |       |       |
| Cc02_g13600 | AT2G33810 | Squamosa promoter-binding protein 1                        | -2.05 | -2.84 |       | -2.66 |
| Cc11_g11720 | AT2G03710 | MADS-box protein CMB1                                      | -3.04 |       |       |       |
| Cc02_g24840 |           | myb-like HTH transcriptional regulator family protein      | -6.05 | -4.48 |       |       |
| Cc08_g00740 | AT5G25390 | Ethylene-responsive transcription factor SHINE 3           | -6.73 | -6.87 | -4.02 | -8.37 |
| Cc02_g03430 | AT4G25490 | Dehydration-responsive element-binding protein 1D          |       | 9.26  |       |       |
| Cc06_g16230 |           | Transcription factor HBP-1b(c38)                           |       | 6.76  |       |       |
| Cc06_g05680 |           | Putative Protein ABSCISIC ACID-INSENSITIVE 5               |       | 6.63  |       |       |
| Cc03_g05410 | AT3G23240 | Ethylene-responsive transcription factor 1B                |       | 3.18  |       |       |
| Cc06_g11570 | AT2G26150 | Heat shock factor                                          |       | 2.36  |       |       |
| Cc01_g07640 | AT2G27230 | Transcription factor LHW                                   |       | 2.16  | 1.90  | 1.87  |
| Cc02_g05970 | AT2G40340 | Putative Dehydration-responsive element-binding protein 2C |       | 2.01  |       | 2.63  |
| Cc07_g03670 | AT5G19790 | Putative uncharacterized protein                           |       | 1.77  |       |       |
| Cc01_g00630 |           | Putative Transcription initiation factor TFIID subunit 7   |       | 1.60  |       |       |
| Cc04_g01480 | AT3G14020 | Putative Nuclear transcription factor Y subunit A-3        |       | 1.58  |       |       |
| Cc08_g04470 |           | Putative Ethylene-responsive transcription factor RAP2-12  |       | 1.49  |       |       |
| Cc00_g21780 |           | Putative Transcription factor VIP1                         |       | 1.46  |       |       |
| Cc08_g12100 |           | myb-like transcription factor family protein               |       | 1.46  |       |       |
| Cc01_g02840 |           | TBP-associated factor 7                                    |       | 1.39  |       |       |

|             |           |                                                     |       |       |       |
|-------------|-----------|-----------------------------------------------------|-------|-------|-------|
| Cc00_g03570 |           | Probable transcription factor PosF21                | 1.10  |       |       |
| Cc06_g15010 |           | WRKY transcription factor                           | 1.06  |       |       |
| Cc05_g11430 |           | Transcription factor TCP4                           | -1.44 |       |       |
| Cc05_g04000 |           | WRKY transcription factor 6                         | -1.50 |       |       |
| Cc06_g06710 | AT3G05690 | Putative Nuclear transcription factor Y subunit A-2 | -1.74 |       |       |
| Cc02_g39120 | AT4G11070 | Putative WRKY transcription factor 30               | -1.82 | -2.07 |       |
| Cc05_g11450 |           | Putative uncharacterized protein                    | -1.87 |       |       |
| Cc10_g02460 | AT1G75390 | Putative Ocs element-binding factor 1               | -1.89 |       |       |
| Cc07_g06340 | AT4G24240 | Putative Probable WRKY transcription factor 7       | -1.98 |       |       |
| Cc01_g18730 | AT2G30590 | Probable WRKY transcription factor 21               | -2.14 |       |       |
| Cc04_g05860 | AT5G61890 | Hypothetical protein                                | -2.83 |       |       |
| Cc01_g09290 | AT1G08320 | Transcription factor TGA2                           | -2.97 |       |       |
| Cc04_g02760 |           | Ethylene-responsive transcription factor TINY       | -3.12 | -3.39 | -2.77 |
| Cc02_g05410 | AT2G40620 | Transcription factor RF2b                           | -3.12 |       | -2.55 |
| Cc07_g16400 | AT5G64810 | Probable WRKY transcription factor 51               | -3.53 |       |       |
| Cc04_g06970 | AT1G73805 | Calmodulin binding protein-like                     | -3.82 | -2.51 |       |
| Cc07_g07090 | AT4G37650 | Protein SHORT-ROOT                                  | -3.88 |       | -2.87 |
| Cc02_g37070 |           | Putative Transcription factor TCP19                 | -3.91 |       |       |
| Cc08_g11060 | AT5G26170 | Putative Probable WRKY transcription factor 50      | -4.17 |       | -3.24 |
| Cc07_g14150 | AT2G22540 | MADS-box protein SVP                                | -4.40 | -1.88 | -3.14 |
| Cc02_g39490 | AT1G01250 | AP2/ERF domain-containing transcription factor      | -4.42 | -2.68 | -4.04 |
| Cc10_g07690 | AT4G37750 | Putative uncharacterized protein                    | -4.83 |       | -4.96 |
| Cc02_g24810 | AT2G44940 | Putative uncharacterized protein                    | -5.87 | -2.26 | -5.55 |
| Cc00_g15310 |           | DNA binding                                         | -6.09 |       |       |
| Cc08_g12160 |           | Ethylene-responsive transcription factor ERF039     | -6.91 |       |       |
| Cc05_g09250 |           | Floral homeotic protein AGAMOUS                     | -7.38 |       |       |

|             |           |                                                               |        |       |
|-------------|-----------|---------------------------------------------------------------|--------|-------|
| Cc04_g04250 | AT1G15360 | Ethylene-responsive transcription factor WIN1                 | -7.79  | -8.96 |
| Cc07_g07330 | AT1G75390 | Putative basic leucine-zipper 6                               | 4.79   | 5.21  |
| Cc07_g09170 |           | G-box-binding factor 1                                        | 1.46   |       |
| Cc06_g15370 |           | Putative Two-component response regulator ARR18               | 1.45   |       |
| Cc11_g10560 |           | AP2/ERF and B3 domain-containing transcription repressor TEM1 | -1.64  |       |
| Cc08_g07850 |           | Putative Probable WRKY transcription factor 40                | -4.55  |       |
| Cc08_g13970 |           | Ethylene-responsive transcription factor ERF025               | -7.61  | -7.25 |
| Cc06_g19110 | AT3G56970 | Putative Transcription factor ORG2                            | -25.66 |       |
| Cc10_g07580 | AT2G18160 | Putative basic leucine-zipper 5                               |        | 7.47  |
| Cc11_g17170 | AT5G13080 | WRKY DNA binding protein                                      |        | 4.02  |
| Cc10_g06050 |           | Transcription factor TGA7                                     |        | 2.58  |
| Cc10_g07460 | AT1G78080 | Ethylene-responsive transcription factor RAP2-4               |        | 1.64  |
| Cc10_g13150 | AT1G21450 | Scarecrow-like protein 1                                      |        | 1.10  |
| Cc10_g02230 |           | Putative Transcription initiation factor IIF subunit beta     |        | 1.05  |
| Cc06_g19310 |           | Putative Predicted protein                                    |        | -1.43 |
| Cc06_g10260 |           | Dehydration-responsive element-binding protein 3              |        | -2.39 |
| Cc04_g05340 |           | AP2-like ethylene-responsive transcription factor At1g16060   |        | -6.30 |
