# Supplementary material for: Understanding the Impact of Drought in Coffea Genotypes: Transcriptomic Analysis Supports a Common High Resilience to Moderate Water Deficit but a Genotype Dependent Sensitivity to Severe Water Deficit
Source: MDPI journal article supplement (doi:10.3390/agronomy11112255), 2021-11-08
Supplement: s1 [file s1 › Table_S9.pdf]

**Table S9.** Regulation pattern of among differentially expressed genes (DEGs) related to catalytic activities, between plants of *C. canephora* cv. Conilon Clone CL153 (CL153) and *Coffea arabica* cv. Icatu (Icatu), submitted to moderate water deficit (MWD) and severe water deficit (SWD), relative to the control of well-watered (WW) plants. DEGs were selected if annotated with the Gene Ontology (GO) terms “phosphatase activity” (GO:0016791) and/or “protein kinase activity” (GO:0004672), or any of its respective child terms. Red represent up-regulated DEGs and blue represent down-regulated DEGs.

| Gene ID              | Homolog   | Protein name                                | Log <sub>2</sub> FC |       |       |       |
|----------------------|-----------|---------------------------------------------|---------------------|-------|-------|-------|
|                      |           |                                             | CL153               |       | Icatu |       |
|                      |           |                                             | MWD                 | SWD   | MWD   | SWD   |
| Phosphatase activity |           |                                             |                     |       |       |       |
| Cc05_g03280          |           | inhibitor-3                                 |                     |       |       | 1.47  |
| Cc11_g12000          | AT1G13750 | Probable inactive purple acid phosphatase 1 | -3.78               | -4.38 |       | -3.56 |
| Cc02_g32670          | AT1G54780 | UPF0603 protein At1g54780, chloroplastic    | -1.94               | -2.38 |       | -1.55 |
| Cc03_g07240          | AT3G07130 | Purple acid phosphatase 23                  |                     | -1.72 |       | -3.06 |
| Cc02_g04640          |           | Acid phosphatase 1                          |                     |       | -2.34 | -3.36 |
| Cc11_g05810          | AT2G01890 | Purple acid phosphatase 8                   |                     |       |       | -5.37 |
| Cc04_g09270          |           | Purple acid phosphatase 17                  |                     |       | -4.61 |       |
| Cc06_g05620          | AT3G52780 | Probable purple acid phosphatase 20         |                     | 13.03 |       |       |
| Cc11_g05820          | AT1G14700 | Purple acid phosphatase 3                   |                     | -1.61 |       |       |
| Cc11_g12020          |           | Probable inactive purple acid phosphatase 1 |                     | -1.14 |       |       |
| Cc01_g13400          | AT2G29380 | Protein phosphatase 2C 37                   | 5.02                | 5.09  |       | 2.99  |
| Cc08_g16010          | AT5G59220 | Putative highly ABA-induced PP2C gene 2     | 5.97                | 5.07  |       | 6.1   |
| Cc06_g02670          | AT1G07630 | Probable protein phosphatase 2C 4           | 2.79                | 2.92  |       | 2.16  |
| Cc10_g08590          | AT1G07160 | Putative Probable protein phosphatase 2C 74 | 7.83                | 9.06  |       |       |
| Cc06_g11740          | AT1G72770 | Putative uncharacterized protein            | 1.73                | 1.7   |       | 1.18  |
| Cc11_g09770          |           | Probable protein phosphatase 2C 15          |                     |       | -2.1  | -3.07 |

|             |           |                                                    |  |       |       |  |       |       |       |
|-------------|-----------|----------------------------------------------------|--|-------|-------|--|-------|-------|-------|
| Cc10_g04270 |           | Probable protein phosphatase 2C 12                 |  |       |       |  |       |       | -2.07 |
| Cc01_g14430 | AT2G30020 | Probable protein phosphatase 2C 25                 |  |       |       |  |       |       | 2.59  |
| Cc02_g34520 | AT5G27930 | Probable protein phosphatase 2C 73                 |  |       | -2.01 |  |       |       | -1.72 |
| Cc03_g00420 |           | Probable protein phosphatase 2C 49                 |  |       | 1.27  |  |       |       | 1.05  |
| Cc02_g34560 | AT1G09160 | Probable protein phosphatase 2C 5                  |  |       |       |  |       |       | -1.33 |
| Cc05_g07540 | AT4G28400 | Probable protein phosphatase 2C 58                 |  |       | -1.93 |  |       |       |       |
| Cc03_g02000 | AT3G16560 | Probable protein phosphatase 2C 40                 |  |       | -2.56 |  |       |       |       |
| Cc02_g21490 |           | Probable protein phosphatase 2C 10                 |  |       | 1.48  |  |       |       |       |
| Cc02_g07430 | AT3G11410 | Protein phosphatase 2C 37                          |  |       | 1.75  |  |       |       |       |
| Cc00_g00310 | AT5G06750 | Putative Probable protein phosphatase 2C 43        |  |       | -2.99 |  |       |       |       |
| Cc03_g03380 |           | Protein phosphatase 2C 70                          |  |       | 1.18  |  |       |       |       |
| Cc11_g15860 |           | Probable protein phosphatase 2C 14                 |  |       | 2.72  |  |       |       |       |
| Cc00_g04120 |           | Protein-tyrosine-phosphatase PTP1                  |  |       |       |  |       |       | 0.9   |
| Cc02_g24930 |           | Putative dual specificity protein phosphatase DSP8 |  |       |       |  |       |       | -1.43 |
| Cc05_g02830 |           | Probable tyrosine-protein phosphatase At1g05000    |  |       |       |  | -2.76 |       |       |
| Cc06_g19640 |           | Putative Dual specificity protein phosphatase 12   |  |       | 1.26  |  |       |       |       |
| Cc07_g05910 | AT1G49620 | Putative uncharacterized protein                   |  |       | -2.65 |  |       |       | -1.91 |
| Cc01_g17060 |           | Cyclin-dependent kinase inhibitor 3                |  |       | 1.26  |  |       |       |       |
| Cc03_g01290 | AT1G24020 | Major allergen Pru ar 1                            |  | -7.23 | -7.96 |  | -8.46 | -7.13 |       |
| Cc11_g14370 | AT1G24020 | MLP-like protein 423                               |  |       | -6.76 |  |       | -5.31 |       |
| Cc00_g20730 |           | Major allergen Mal d 1                             |  |       |       |  |       | 6.76  |       |
| Cc03_g01310 |           | Putative Major allergen Pru av 1                   |  |       |       |  |       | 1.3   |       |
| Cc02_g05540 | AT3G10940 | Phosphoglucan phosphatase LSF2, chloroplastic      |  |       | -1.63 |  |       | -1.32 |       |
| Cc01_g07830 | AT5G22090 | Putative Protein FAF-like, chloroplastic           |  |       | -2.36 |  |       | -3.21 |       |
| Cc04_g02120 |           | Inorganic pyrophosphatase 2                        |  |       |       |  |       | -2.64 |       |
| Cc09_g04090 |           | Putative Phosphoglycolate phosphatase              |  |       |       |  |       | -1.53 |       |

|                                |           |                                                                                               |       |       |            |
|--------------------------------|-----------|-----------------------------------------------------------------------------------------------|-------|-------|------------|
| Cc07_g02150                    |           | Phosphoglucan phosphatase LSF1, chloroplastic                                                 | 1.95  |       |            |
| Cc08_g08350                    | AT5G25510 | Serine/threonine protein phosphatase 2A 57 kDa regulatory subunit B' iota isoform             |       |       | -1.63      |
| Cc06_g01860                    | AT3G54050 | Fructose-1,6-bisphosphatase, chloroplastic                                                    | -2.36 |       | -2.79      |
| Cc10_g14740                    | AT1G43670 | Fructose-1,6-bisphosphatase, cytosolic                                                        |       |       | -2.23      |
| Cc02_g06960                    | AT3G55800 | Sedoheptulose-1,7-bisphosphatase, chloroplastic                                               | -2.07 |       | -1.8       |
| Cc07_g11740                    |           | Putative Phosphatidylinositide phosphatase SAC1                                               |       | 1.12  |            |
| Cc07_g15380                    | AT5G65140 | Probable trehalose-phosphate phosphatase J                                                    | -3.02 |       |            |
| <b>Protein kinase activity</b> |           |                                                                                               |       |       |            |
| Cc02_g25260                    | AT2G44740 | Cyclin-U4-1                                                                                   | -2.87 | -2.01 | -5.97      |
| Cc01_g19450                    | AT3G63120 | Cyclin-P3-1                                                                                   |       | -5.87 | -2.01 -3.6 |
| Cc05_g05150                    | AT3G21870 | Cyclin-U1-1                                                                                   |       | -2.42 |            |
| Cc03_g05070                    | AT3G23150 | Protein EIN4                                                                                  | 2.33  | 3.13  |            |
| Cc02_g09070                    |           | Protein EIN4                                                                                  |       | 1.12  |            |
| Cc03_g10700                    | AT3G28040 | Probably inactive leucine-rich repeat receptor-like protein kinase At3g28040                  | -8.28 | -8.18 | -6.5       |
| Cc10_g14210                    | AT5G48940 | LRR receptor-like serine/threonine-protein kinase RCH1                                        | -7.84 | -7.07 | -5.61      |
| Cc11_g05120                    | AT4G27290 | G-type lectin S-receptor-like serine/threonine-protein kinase At4g27290                       | 2.73  | 2.52  |            |
| Cc11_g09660                    | AT2G01210 | Probable inactive leucine-rich repeat receptor-like protein kinase At1g66830                  | -2.71 | -2.59 |            |
| Cc02_g11090                    | AT3G09830 | Probable receptor-like protein kinase At5g15080                                               | 2.97  | 3.6   |            |
| Cc04_g11330                    |           | Putative protein kinase family protein / peptidoglycan-binding LysM domain-containing protein | 3.43  | 2.54  | 4.67       |
| Cc04_g14520                    | AT2G37710 | L-type lectin-domain containing receptor kinase IV.2                                          | 2.49  | 3.46  |            |
| Cc01_g04030                    | AT1G34300 | Putative G-type lectin S-receptor-like serine/threonine-protein kinase RLK1                   | 5.47  | 4.61  |            |
| Cc10_g04620                    | AT1G01540 | Probable serine/threonine-protein kinase At1g01540                                            | -2.21 | -3.09 | -1.93      |
| Cc00_g18750                    | AT1G11330 | Hypothetical protein                                                                          | 1.78  | 1.75  | 2.66       |
| Cc02_g14800                    |           | Putative LRR receptor-like serine/threonine-protein kinase FLS2                               | -2.03 |       |            |
| Cc00_g01370                    | AT3G53810 | L-type lectin-domain containing receptor kinase IV.1                                          | 1.76  | 1.54  |            |
| Cc04_g10280                    |           | Putative Uncharacterized aarF domain-containing protein kinase 1                              | -1.29 | -1.51 |            |

|             |           |                                                                                       |       |       |       |       |
|-------------|-----------|---------------------------------------------------------------------------------------|-------|-------|-------|-------|
| Cc02_g23990 |           | Putative Leucine-rich repeat receptor protein kinase EXS                              | -6.33 | -4.62 |       |       |
| Cc06_g16470 | AT5G06940 | Probably inactive leucine-rich repeat receptor-like protein kinase At5g06940          | -4.28 | -8.28 | -4.49 | -5.05 |
| Cc10_g13710 | AT1G23540 | Protein kinase protein with adenine nucleotide alpha hydrolases-like domain           | -2.15 | -3.39 | -2.64 | -4.76 |
| Cc05_g06630 |           | Protein STRUBBELIG-RECEPTOR FAMILY 3                                                  | -1.9  |       |       |       |
| Cc01_g14440 | AT2G32510 | Putative uncharacterized protein                                                      | 3.87  | 6.25  |       |       |
| Cc07_g13350 | AT5G16590 | Probable inactive receptor kinase At1g48480                                           | -2.43 | -4.69 | -4.6  | -6.06 |
| Cc08_g07270 | AT2G02780 | Probable LRR receptor-like serine/threonine-protein kinase At1g14390                  |       | -3    | -2.1  | -3.75 |
| Cc04_g06040 | AT1G48480 | Probable inactive receptor kinase At1g48480                                           |       | -4.54 | -2.72 | -5.63 |
| Cc06_g17380 | AT3G03770 | Probable inactive leucine-rich repeat receptor-like protein kinase At3g03770          |       | -2.44 |       | -3.68 |
| Cc02_g05130 | AT5G58300 | Probable inactive receptor kinase At5g58300                                           |       | -3.44 | -1.93 | -4    |
| Cc05_g09040 |           | Probable LRR receptor-like serine/threonine-protein kinase At1g07650                  |       |       |       | -4.23 |
| Cc05_g10850 |           | Probable leucine-rich repeat receptor-like serine/threonine-protein kinase At3g14840  |       |       |       | -2.26 |
| Cc05_g13650 |           | Calcium-dependent protein kinase isoform 2                                            |       |       | -2.93 | -3.72 |
| Cc01_g16990 | AT5G48740 | Probable LRR receptor-like serine/threonine-protein kinase At5g48740                  |       | -3.08 | -4.44 | -7.58 |
| Cc08_g15670 | AT4G23740 | Probable inactive receptor kinase At4g23740                                           |       | -7.49 |       | -6.7  |
| Cc02_g05340 | AT3G56370 | Putative Probably inactive leucine-rich repeat receptor-like protein kinase At3g28040 |       | -3.93 | -3.26 | -6.11 |
| Cc02_g16100 | AT2G43850 | Integrin-linked protein kinase family                                                 |       | -1.74 |       | -1.9  |
| Cc01_g08550 |           | Serine/threonine-protein kinase Nek5                                                  |       | -1.83 | -2.35 | -3.22 |
| Cc07_g00630 | AT3G03770 | Putative Probable inactive leucine-rich repeat receptor-like protein kinase At3g03770 |       | -2.9  |       | -4.7  |
| Cc07_g07650 | AT5G65700 | Leucine-rich repeat receptor-like serine/threonine-protein kinase BAM1                |       | -2.03 |       | -2.51 |
| Cc05_g12020 | AT1G09600 | Protein kinase superfamily protein                                                    |       | -2.93 |       | -2.26 |
| Cc03_g09580 | AT4G32710 | Putative Probably inactive leucine-rich repeat receptor-like protein kinase At5g48380 |       | -5.39 |       | -3.56 |
| Cc06_g07330 |           | Putative Leucine-rich repeat receptor-like protein kinase TDR                         |       |       |       | -2.39 |
| Cc00_g08570 | AT3G51740 | Putative Probable leucine-rich repeat receptor-like protein kinase At1g35710          |       | -2.86 |       | -5.24 |
| Cc01_g10910 |           | Receptor-like serine/threonine-protein kinase NCRK                                    |       |       |       | -2.22 |
| Cc03_g12920 | AT3G59420 | Serine/threonine-protein kinase-like protein ACR4                                     |       | -3.38 |       | -3.1  |

|             |           |                                                                                       |       |       |       |
|-------------|-----------|---------------------------------------------------------------------------------------|-------|-------|-------|
| Cc02_g35750 | AT5G18500 | Probable receptor-like protein kinase At2g42960                                       | -3.25 | -2.24 | -3.38 |
| Cc11_g16780 |           | Putative Probable inactive leucine-rich repeat receptor-like protein kinase At1g66830 |       |       | -4.91 |
| Cc05_g10050 | AT1G53700 | Putative Protein kinase G11A                                                          | -6.28 |       | -4.84 |
| Cc08_g14480 |           | Probable LRR receptor-like serine/threonine-protein kinase At1g63430                  |       |       | -2.2  |
| Cc02_g15130 |           | Probable LRR receptor-like serine/threonine-protein kinase MRH1                       |       |       | -4.65 |
| Cc02_g17540 |           | Probable LRR receptor-like serine/threonine-protein kinase At2g16250                  |       | -1.57 | -1.7  |
| Cc05_g10860 |           | Probable leucine-rich repeat receptor-like serine/threonine-protein kinase At3g14840  | -3.94 | -2.46 | -5.12 |
| Cc03_g07380 |           | Protein kinase superfamily protein                                                    |       |       | -1.41 |
| Cc06_g17550 |           | Putative Probable leucine-rich repeat receptor-like protein kinase At1g35710          |       | -2.37 | -4.32 |
| Cc06_g03720 |           | L-type lectin-domain containing receptor kinase VIII.1                                |       | -2.63 | -4.22 |
| Cc01_g17320 | AT3G24660 | Putative kinase-like protein TMKL1                                                    | -2.43 |       | -2.9  |
| Cc09_g06910 | AT2G37710 | L-type lectin-domain containing receptor kinase IV.1                                  | -4.11 |       | -1.86 |
| Cc11_g16310 | AT1G67720 | Probable LRR receptor-like serine/threonine-protein kinase At1g67720                  |       |       | -1.9  |
| Cc06_g15060 | AT2G24230 | Probable LRR receptor-like serine/threonine-protein kinase At2g24230                  | -4.56 |       | -2.55 |
| Cc04_g10890 | AT2G31880 | Leucine-rich repeat receptor-like serine/threonine/tyrosine-protein kinase SOBIR1     | -1.84 | -1.15 | -2.46 |
| Cc11_g05000 | AT3G51550 | Receptor-like protein kinase FERONIA                                                  | -2.47 |       | -2.25 |
| Cc02_g12010 |           | Putative G-type lectin S-receptor-like serine/threonine-protein kinase SD1-1          |       |       | -2.73 |
| Cc03_g13280 |           | Putative LRR receptor-like serine/threonine-protein kinase EFR                        |       |       | -5.53 |
| Cc02_g18910 |           | Probable receptor-like protein kinase At1g49730                                       |       |       | -2.19 |
| Cc00_g32370 |           | Putative Probable LRR receptor-like serine/threonine-protein kinase At4g08850         |       |       | -7.27 |
| Cc11_g09790 | AT5G38280 | Putative Protein kinase superfamily protein                                           | -4.53 |       | -2.66 |
| Cc04_g04440 |           | Protein kinase superfamily protein                                                    | 1.91  |       | 1.33  |
| Cc04_g00580 |           | Protein STRUBBELIG-RECEPTOR FAMILY 6                                                  |       |       | -1.08 |
| Cc05_g09640 | AT2G42960 | Probable receptor-like protein kinase At2g42960                                       |       | -3.2  | -2.6  |
| Cc06_g20000 | AT3G51550 | Receptor-like protein kinase FERONIA                                                  | -2.66 |       | -3.34 |
| Cc00_g07730 |           | Putative Probable LRR receptor-like serine/threonine-protein kinase At3g47570         |       |       | -2.03 |

|             |           |                                                                                      |       |       |
|-------------|-----------|--------------------------------------------------------------------------------------|-------|-------|
| Cc10_g15220 | AT4G08850 | Putative Probable LRR receptor-like serine/threonine-protein kinase At4g08850        | -3.9  | -5.05 |
| Cc07_g06440 |           | Probable LRR receptor-like serine/threonine-protein kinase At4g37250                 |       | -2.05 |
| Cc00_g05240 | AT1G35710 | Putative Probable LRR receptor-like serine/threonine-protein kinase At4g08850        |       | -4.07 |
| Cc02_g38420 |           | Probable serine/threonine-protein kinase At1g01540                                   |       | -1.86 |
| Cc09_g04550 | AT4G20270 | Leucine-rich repeat receptor-like serine/threonine-protein kinase BAM3               | -1.85 | -2.26 |
| Cc00_g21310 |           | Putative Probable leucine-rich repeat receptor-like protein kinase At1g35710         |       | -6.28 |
| Cc00_g13430 | AT3G51550 | Receptor-like protein kinase FERONIA                                                 | -2.18 | -1.98 |
| Cc04_g02520 |           | Putative proline-rich receptor-like protein kinase PERK11                            |       | -2.06 |
| Cc00_g13410 | AT3G51550 | Receptor-like protein kinase FERONIA                                                 | -1.82 | -2.22 |
| Cc06_g09170 |           | Probable inactive receptor kinase At2g26730                                          |       | -2.55 |
| Cc08_g13530 |           | Probable LRR receptor-like serine/threonine-protein kinase At1g12460                 |       | -2.48 |
| Cc02_g04620 |           | U-box domain-containing protein 35                                                   |       | -1.09 |
| Cc10_g03070 | AT3G17850 | Protein kinase superfamily protein                                                   | 1.9   | 1.19  |
| Cc11_g04990 | AT3G51550 | Receptor-like protein kinase FERONIA                                                 | -2.77 | -2.16 |
| Cc05_g14630 | AT5G55560 | Probable serine/threonine-protein kinase WNK11                                       | 1.46  | 1.26  |
| Cc05_g10820 |           | Probable leucine-rich repeat receptor-like serine/threonine-protein kinase At3g14840 |       | 1.76  |
| Cc01_g14620 |           | Putative Probable LRR receptor-like serine/threonine-protein kinase MRH1             |       | -3.88 |
| Cc02_g01730 |           | Putative Probable receptor-like protein kinase At1g67000                             |       | -1.71 |
| Cc02_g01990 | AT4G23740 | Probable inactive receptor kinase At4g23740                                          | -4.07 | -1.22 |
| Cc02_g32130 | AT3G03770 | Probable inactive leucine-rich repeat receptor-like protein kinase At3g03770         | -3.93 |       |
| Cc06_g16710 | AT2G41820 | Leucine-rich repeat receptor-like tyrosine-protein kinase At2g41820                  | -3.48 |       |
| Cc10_g00770 | AT4G35230 | Probable serine/threonine-protein kinase At4g35230                                   | 2.16  |       |
| Cc01_g19140 | AT2G24360 | Putative serine/threonine-protein kinase/receptor R826                               | 2.49  |       |
| Cc04_g14640 | AT3G53810 | L-type lectin-domain containing receptor kinase IV.2                                 | -3.05 |       |
| Cc07_g13990 | AT5G10520 | Receptor-like cytosolic serine/threonine-protein kinase RBK1                         | -2.02 |       |
| Cc04_g02090 | AT1G23540 | Putative Inactive protein kinase SELMODRAFT_444075                                   | -2.63 |       |

|             |           |                                                                                      |       |
|-------------|-----------|--------------------------------------------------------------------------------------|-------|
| Cc10_g06310 | AT1G71810 | Uncharacterized aarF domain-containing protein kinase At1g71810, chloroplastic       | 2.03  |
| Cc04_g04850 | AT1G80640 | Probable receptor-like protein kinase At1g80640                                      | -2.6  |
| Cc00_g00500 | AT5G38280 | Putative Protein kinase superfamily protein                                          | -4.5  |
| Cc01_g03450 | AT4G08850 | Putative Probable LRR receptor-like serine/threonine-protein kinase At4g08850        | -7.76 |
| Cc02_g32030 | AT2G17220 | Putative Probable serine/threonine-protein kinase Cx32, chloroplastic                | -8.27 |
| Cc07_g08090 | AT5G57670 | Protein kinase superfamily protein                                                   | -2.79 |
| Cc06_g15450 | AT1G65790 | Putative uncharacterized protein                                                     | 3.35  |
| Cc00_g05290 | AT1G35710 | Putative Probable leucine-rich repeat receptor-like protein kinase At1g35710         | -3.88 |
| Cc00_g00610 | AT1G66920 | Putative Protein kinase superfamily protein                                          | -2.65 |
| Cc00_g16320 | AT5G38280 | Putative Probable receptor-like protein kinase At5g39030                             | -3.84 |
| Cc07_g07640 | AT5G65710 | LRR receptor-like serine/threonine-protein kinase HSL2                               | -2.09 |
| Cc07_g02320 |           | Putative Serine/threonine-protein kinase HT1                                         | -1.77 |
| Cc05_g05830 | AT3G21800 | Putative UDP-glucose flavonoid 3-O-glucosyltransferase 3                             | -2.55 |
| Cc07_g06250 | AT5G67200 | Probable inactive receptor kinase At5g67200                                          | -2.62 |
| Cc00_g15440 | AT4G08850 | Putative Probable LRR receptor-like serine/threonine-protein kinase At4g08850        | -4.72 |
| Cc09_g05900 |           | Wall-associated receptor kinase-like 9                                               | -5.89 |
| Cc00_g33660 | AT1G66920 | Putative Protein kinase superfamily protein                                          | -2.78 |
| Cc03_g08650 | AT4G08850 | Putative Probable LRR receptor-like serine/threonine-protein kinase At4g08850        | -4.97 |
| Cc00_g11980 | AT4G08850 | Putative Probable LRR receptor-like serine/threonine-protein kinase At4g08850        | -3.32 |
| Cc06_g19780 | AT3G51550 | Putative Receptor-like protein kinase FERONIA                                        | -2.04 |
| Cc10_g07290 | AT4G08850 | Putative Probable LRR receptor-like serine/threonine-protein kinase At4g08850        | 3.95  |
| Cc01_g15390 | AT5G58300 | Probable inactive receptor kinase At5g58300                                          | -2.56 |
| Cc05_g10830 | AT3G14840 | Probable leucine-rich repeat receptor-like serine/threonine-protein kinase At3g14840 | -5.42 |
| Cc00_g27770 | AT1G35710 | Putative Probable leucine-rich repeat receptor-like protein kinase At1g35710         | -3.45 |
| Cc01_g02930 | AT1G11330 | G-type lectin S-receptor-like serine/threonine-protein kinase At1g11330              | -6.78 |
| Cc10_g13900 | AT2G17220 | Putative Probable serine/threonine-protein kinase NAK                                | -2.77 |

|             |           |                                                                                   |       |
|-------------|-----------|-----------------------------------------------------------------------------------|-------|
| Cc09_g01270 | AT4G22130 | Protein STRUBBELIG-RECEPTOR FAMILY 8                                              | -2.54 |
| Cc05_g03560 | AT4G23180 | Putative Cysteine-rich receptor-like protein kinase 25                            | -2.85 |
| Cc02_g22650 | AT1G11050 | Probable receptor-like protein kinase At1g11050                                   | -3.13 |
| Cc10_g15250 | AT4G08850 | Probable LRR receptor-like serine/threonine-protein kinase At4g08850              | -3.91 |
| Cc09_g05880 | AT1G19390 | Kinase, putative                                                                  | -4.68 |
| Cc00_g25450 | AT4G08850 | Putative Probable LRR receptor-like serine/threonine-protein kinase At4g08850     | -3.95 |
| Cc00_g11970 | AT4G08850 | Putative Probable LRR receptor-like serine/threonine-protein kinase At4g08850     | -2.98 |
| Cc11_g05150 | AT4G27290 | G-type lectin S-receptor-like serine/threonine-protein kinase At4g27290           | -2.11 |
| Cc01_g12080 | AT3G46290 | Receptor-like protein kinase HERK 1                                               | 1.66  |
| Cc02_g10180 | AT5G39000 | Putative receptor-like protein kinase At5g39000                                   | -2.9  |
| Cc02_g32040 |           | Leucine-rich repeat receptor-like serine/threonine/tyrosine-protein kinase SOBIR1 | -6.42 |
| Cc00_g26190 | AT3G47570 | Putative Probable LRR receptor-like serine/threonine-protein kinase At3g47570     | -2.66 |
| Cc04_g14650 | AT2G37710 | L-type lectin-domain containing receptor kinase IV.1                              | -1.72 |
| Cc00_g05990 |           | Putative Probable leucine-rich repeat receptor-like protein kinase At1g35710      | -7.35 |
| Cc03_g08680 | AT4G08850 | Putative Probable LRR receptor-like serine/threonine-protein kinase At4g08850     | -4.04 |
| Cc08_g13220 |           | Putative Protein STRUBBELIG-RECEPTOR FAMILY 8                                     | -2.58 |
| Cc07_g14790 | AT2G17220 | Putative Probable serine/threonine-protein kinase Cx32, chloroplastic             | -4.11 |
| Cc02_g15910 | AT1G29750 | Probable LRR receptor-like serine/threonine-protein kinase RFK1                   | 1.77  |
| Cc10_g01180 | AT1G76040 | Calcium-dependent protein kinase 29                                               | 1.77  |
| Cc04_g14540 | AT2G37710 | L-type lectin-domain containing receptor kinase IV.1                              | -2.42 |
| Cc03_g02360 |           | Probable serine/threonine-protein kinase At1g54610                                | -3.7  |
| Cc01_g17940 | AT4G08850 | Putative Probable leucine-rich repeat receptor-like protein kinase At1g35710      | -3.61 |
| Cc03_g08610 | AT4G08850 | Putative Probable LRR receptor-like serine/threonine-protein kinase At4g08850     | -4.68 |
| Cc02_g06120 | AT3G56050 | Putative Probable LRR receptor-like serine/threonine-protein kinase MRH1          | 1.71  |
| Cc01_g08200 | AT5G49770 | Putative Probable leucine-rich repeat receptor-like protein kinase At5g49770      | -2.23 |
| Cc00_g00560 |           | Putative uncharacterized protein                                                  | -3.37 |

|             |           |                                                                                               |       |
|-------------|-----------|-----------------------------------------------------------------------------------------------|-------|
| Cc06_g12210 |           | Putative receptor-like protein kinase At1g72540                                               | -2.54 |
| Cc02_g30790 | AT1G16110 | Putative LRR receptor-like serine/threonine-protein kinase FLS2                               | -2.47 |
| Cc04_g08690 |           | Putative Receptor-like serine/threonine-protein kinase SD1-7                                  | 2.37  |
| Cc10_g12040 | AT4G08850 | Putative uncharacterized protein                                                              | -6.1  |
| Cc07_g04390 | AT3G51550 | Putative Receptor-like protein kinase FERONIA                                                 | -2.18 |
| Cc03_g08750 |           | Putative Probable LRR receptor-like serine/threonine-protein kinase At4g08850                 | -3.93 |
| Cc10_g13890 |           | Putative Probable LRR receptor-like serine/threonine-protein kinase At2g16250                 | -1.18 |
| Cc07_g05210 | AT2G23770 | Putative protein kinase family protein / peptidoglycan-binding LysM domain-containing protein | 1.81  |
| Cc09_g10140 | AT1G10620 | Putative Protein kinase protein with adenine nucleotide alpha hydrolases-like domain          | -2.01 |
| Cc00_g33740 | AT4G08850 | Putative Probable LRR receptor-like serine/threonine-protein kinase At4g08850                 | -2.58 |
| Cc02_g10200 | AT3G51550 | Putative Receptor-like protein kinase FERONIA                                                 | -2.8  |
| Cc04_g14560 | AT2G37710 | L-type lectin-domain containing receptor kinase IV.2                                          | -1.94 |
| Cc02_g31960 |           | Putative LRR receptor-like serine/threonine-protein kinase GSO1                               | -6.48 |
| Cc10_g10360 | AT1G21270 | Putative Wall-associated receptor kinase 2                                                    | -2.4  |
| Cc03_g10610 |           | Putative Probable LRR receptor-like serine/threonine-protein kinase At4g08850                 | -3.01 |
| Cc03_g03360 | AT3G06030 | Mitogen-activated protein kinase kinase kinase 3                                              | -1.63 |
| Cc11_g00840 |           | Putative Probable LRR receptor-like serine/threonine-protein kinase At3g47570                 | -2.6  |
| Cc02_g04630 |           | Putative kinase-like protein TMKL1                                                            | -2.44 |
| Cc00_g26900 |           | Putative Probable LRR receptor-like serine/threonine-protein kinase At4g08850                 | -2.62 |
| Cc04_g16790 | AT2G17220 | Putative Probable serine/threonine-protein kinase Cx32, chloroplastic                         | -1.57 |
| Cc00_g01420 | AT2G37710 | L-type lectin-domain containing receptor kinase IV.1                                          | -2.02 |
| Cc01_g09560 |           | Protein kinase G11A                                                                           | -2.05 |
| Cc05_g15130 |           | Protein kinase G11A                                                                           | -1.48 |
| Cc05_g00260 |           | Putative Probable LRR receptor-like serine/threonine-protein kinase At3g47570                 | -5.77 |
| Cc03_g13610 |           | L-type lectin-domain containing receptor kinase IV.1                                          | -4.07 |
| Cc02_g15920 | AT3G14840 | Probable LRR receptor-like serine/threonine-protein kinase At1g07650                          | 2.14  |

|             |           |                                                                               |       |       |       |        |
|-------------|-----------|-------------------------------------------------------------------------------|-------|-------|-------|--------|
| Cc07_g09380 |           | Proline-rich receptor-like protein kinase PERK5                               |       | 1.92  |       |        |
| Cc03_g10650 |           | Putative Probable LRR receptor-like serine/threonine-protein kinase At4g08850 |       | -3.19 |       |        |
| Cc04_g05060 | AT5G10930 | CBL-interacting serine/threonine-protein kinase 5                             | 2.74  | 2.63  |       | 2.45   |
| Cc10_g00540 | AT2G17220 | Probable serine/threonine-protein kinase Cx32, chloroplastic                  | 2.34  | 2.2   |       |        |
| Cc01_g11900 | AT5G02800 | Probable serine/threonine-protein kinase RLCKVII                              | 3.23  | 3.05  | 2.8   | 3.36   |
| Cc03_g15230 | AT5G49770 | Probable leucine-rich repeat receptor-like protein kinase At5g49770           | -8.17 | -4.48 | -8.35 | -10.51 |
| Cc08_g01090 | AT2G26330 | LRR receptor-like serine/threonine-protein kinase ERECTA                      | -3.98 | -2.93 |       | -3.28  |
| Cc02_g15170 |           | CBL-interacting serine/threonine-protein kinase 12                            | 1.61  | 1.55  |       |        |
| Cc02_g07800 | AT5G02290 | Protein kinase APK1A, chloroplastic                                           | 1.43  | 1.63  |       | 1.8    |
| Cc02_g39880 | AT1G01140 | CBL-interacting serine/threonine-protein kinase 9                             | -2.08 | -2.21 |       | -1.96  |
| Cc01_g15180 | AT2G30360 | CBL-interacting serine/threonine-protein kinase 11                            | 1.9   | 1.61  |       |        |
| Cc08_g11200 | AT4G33950 | Serine/threonine-protein kinase SAPK3                                         | 2.36  | 2.55  |       |        |
| Cc05_g12860 | AT4G27290 | G-type lectin S-receptor-like serine/threonine-protein kinase At4g27290       | -1.96 | -3.63 |       | -3.31  |
| Cc01_g17620 | AT2G20300 | Receptor-like serine/threonine-protein kinase ALE2                            | -4.77 | -3.54 | -2.81 | -5.15  |
| Cc02_g11930 |           | Putative uncharacterized protein                                              | -1.89 | -2.19 |       |        |
| Cc04_g14140 |           | Putative Serine/threonine-protein kinase ATM                                  | 2.55  | 2.48  |       |        |
| Cc11_g05620 | AT2G01950 | Serine/threonine-protein kinase BRI1-like 2                                   | -4    | -4.32 |       |        |
| Cc02_g17600 | AT4G34500 | Probable receptor-like serine/threonine-protein kinase At4g34500              |       | -4.11 | -2.3  | -7.53  |
| Cc02_g15400 |           | Probable LRR receptor-like serine/threonine-protein kinase At5g45780          |       |       | -2.9  | -8.17  |
| Cc00_g18440 | AT4G21390 | G-type lectin S-receptor-like serine/threonine-protein kinase At4g03230       |       | -4.55 |       | -3.5   |
| Cc07_g14700 | AT4G33950 | Serine/threonine-protein kinase SAPK2                                         |       | -2.49 |       | -3.09  |
| Cc05_g15350 | AT4G26540 | Probable LRR receptor-like serine/threonine-protein kinase At4g26540          |       | -4.95 | -2.76 | -4.38  |
| Cc11_g14360 |           | Putative Serine/threonine-protein kinase PBS1                                 |       |       | -4.41 | -8.61  |
| Cc02_g04420 | AT5G61480 | Leucine-rich repeat receptor-like protein kinase TDR                          |       | -5.87 | -3.07 | -5.87  |
| Cc02_g32440 | AT3G05140 | Receptor-like cytosolic serine/threonine-protein kinase RBK2                  |       |       | -2.87 | -3.32  |
| Cc10_g10510 |           | putative protein kinase 1                                                     |       | 1.37  |       | 3.07   |

|             |           |                                                                               |       |       |       |
|-------------|-----------|-------------------------------------------------------------------------------|-------|-------|-------|
| Cc08_g00130 | AT1G80640 | Probable receptor-like protein kinase At1g80640                               | -1.88 | -1.39 | -1.86 |
| Cc01_g04050 | AT2G23950 | Putative G-type lectin S-receptor-like serine/threonine-protein kinase RLK1   | 3.02  |       | 8.05  |
| Cc07_g17480 |           | Putative G-type lectin S-receptor-like serine/threonine-protein kinase RLK1   |       |       | -2.71 |
| Cc04_g13490 | AT4G21390 | G-type lectin S-receptor-like serine/threonine-protein kinase At4g03230       | -3.07 |       | -2.89 |
| Cc04_g05170 | AT1G80870 | Putative receptor-like protein kinase At1g80870                               | -1.89 |       | -2.96 |
| Cc07_g04770 | AT5G16000 | Protein NSP-INTERACTING KINASE 1                                              | -2.65 |       | -2.54 |
| Cc10_g09100 |           | Putative LRR receptor-like serine/threonine-protein kinase GSO1               |       |       | -5.82 |
| Cc07_g17730 |           | Putative G-type lectin S-receptor-like serine/threonine-protein kinase RLK1   |       |       | -1.6  |
| Cc09_g05650 |           | Putative Probable LRR receptor-like serine/threonine-protein kinase At3g47570 |       |       | -4.69 |
| Cc07_g17470 |           | Putative G-type lectin S-receptor-like serine/threonine-protein kinase RLK1   | -3.94 |       | -4.13 |
| Cc05_g07760 | AT1G28440 | Receptor-like protein kinase HSL1                                             | -5.28 |       | -4.97 |
| Cc02_g15390 | AT4G18710 | Shaggy-related protein kinase eta                                             | -1.71 |       | -1.65 |
| Cc03_g05470 | AT1G08650 | Putative Phosphoenolpyruvate carboxylase kinase 1                             |       | -2.82 | -4    |
| Cc00_g18980 | AT5G38280 | Putative Probable receptor-like protein kinase At5g39020                      | -3.11 |       | -1.53 |
| Cc01_g15420 | AT1G06840 | Probable LRR receptor-like serine/threonine-protein kinase At1g06840          | -1.74 |       | -1.56 |
| Cc01_g08520 |           | Putative Probable receptor protein kinase TMK1                                |       |       | -1.82 |
| Cc04_g15670 |           | LRR receptor-like serine/threonine-protein kinase FEI 1                       |       |       | -6.24 |
| Cc04_g12550 | AT4G26540 | Probable LRR receptor-like serine/threonine-protein kinase At4g26540          | -     |       |       |
| Cc00_g00530 | AT5G38280 | Putative Probable receptor-like protein kinase At5g39030                      | 10.56 |       |       |
| Cc00_g11830 |           | Putative Octicosapeptide/Phox/Bem1p family protein                            | -3.81 |       |       |
| Cc00_g00570 | AT5G38280 | Putative Probable receptor-like protein kinase At1g67000                      | -3.31 |       |       |
| Cc00_g18460 | AT4G21390 | S-locus lectin protein kinase family protein                                  | -5.57 |       |       |
| Cc03_g09260 |           | Putative Probable LRR receptor-like serine/threonine-protein kinase At3g47570 | -4.5  |       |       |
| Cc01_g11930 | AT3G45780 | Phototropin-1                                                                 | -6.07 |       |       |
| Cc05_g04090 | AT1G05100 | mitogen-activated protein kinase kinase kinase 18                             | -3.61 |       |       |
|             |           |                                                                               | 4.32  |       |       |

|             |           |                                                                               |       |
|-------------|-----------|-------------------------------------------------------------------------------|-------|
| Cc11_g10600 | AT1G68830 | Serine/threonine-protein kinase STN7, chloroplastic                           | -2.19 |
| Cc04_g04430 | AT3G15890 | PTI1-like tyrosine-protein kinase At3g15890                                   | -2.58 |
| Cc02_g38260 | AT2G19130 | G-type lectin S-receptor-like serine/threonine-protein kinase SD2-2           | -3.75 |
| Cc04_g00430 | AT1G17750 | Receptor-like protein kinase                                                  | -3.91 |
| Cc01_g06680 | AT2G02800 | Protein kinase APK1A, chloroplastic                                           | 2.11  |
| Cc07_g17590 | AT1G34300 | Putative G-type lectin S-receptor-like serine/threonine-protein kinase RLK1   | -5.06 |
| Cc03_g07800 | AT2G32800 | Receptor like protein kinase S.2                                              | -2.87 |
| Cc05_g12890 | AT4G27290 | G-type lectin S-receptor-like serine/threonine-protein kinase At4g27290       | -2.27 |
| Cc00_g00590 | AT5G38280 | Putative Probable receptor-like protein kinase At5g39020                      | -3.59 |
| Cc02_g33720 | AT5G02800 | Putative Protein kinase superfamily protein                                   | -5.1  |
| Cc03_g09320 | AT3G23750 | Probable receptor protein kinase TMK1                                         | -5.39 |
| Cc06_g23860 | AT2G07180 | Protein kinase superfamily protein                                            | -2.32 |
| Cc07_g15490 | AT1G34300 | Putative G-type lectin S-receptor-like serine/threonine-protein kinase RLK1   | -3.27 |
| Cc01_g19930 | AT3G05140 | Receptor-like cytosolic serine/threonine-protein kinase RBK2                  | 1.81  |
| Cc05_g08980 |           | Putative G-type lectin S-receptor-like serine/threonine-protein kinase SD2-5  | -6.56 |
| Cc08_g01510 | AT5G47070 | Probable receptor-like protein kinase At5g47070                               | 1.4   |
| Cc11_g07840 |           | Putative Probable LRR receptor-like serine/threonine-protein kinase At3g47570 | -7.27 |
| Cc00_g00600 | AT5G38280 | Putative uncharacterized protein                                              | -1.69 |
| Cc04_g13790 |           | Putative Probable serine/threonine-protein kinase Cx32, chloroplastic         | -7.13 |
| Cc02_g12060 | AT4G21380 | Receptor-like serine/threonine-protein kinase SD1-8                           | -2.96 |
| Cc00_g16330 |           | Putative Probable receptor-like protein kinase At5g39030                      | -5.56 |
| Cc04_g09550 |           | Protein kinase superfamily protein                                            | -1.33 |
| Cc09_g06080 | AT5G18500 | Putative Probable LRR receptor-like serine/threonine-protein kinase At3g47570 | -3.79 |
| Cc10_g11310 |           | Putative Receptor-like protein kinase HAIKU2                                  | -1.46 |
| Cc04_g07480 | AT5G15080 | Putative receptor protein kinase ZmPK1                                        | -2.37 |
| Cc11_g15400 | AT1G60800 | Protein NSP-INTERACTING KINASE 3                                              | -1.91 |

|             |           |                                                                               |       |       |       |       |
|-------------|-----------|-------------------------------------------------------------------------------|-------|-------|-------|-------|
| Cc11_g08590 |           | Mitogen-activated protein kinase 12                                           |       | -1.35 |       |       |
| Cc11_g09750 |           | Probable serine/threonine-protein kinase At1g18390                            |       | -1.42 |       |       |
| Cc04_g11420 |           | Probable serine/threonine-protein kinase WNK2                                 |       | 1.52  |       |       |
| Cc06_g15160 |           | CBL-interacting serine/threonine-protein kinase 6                             |       | 1.32  |       |       |
| Cc06_g08130 | AT3G01300 | Receptor-like serine/threonine-protein kinase At3g01300                       |       | -1.66 |       |       |
| Cc05_g08950 | AT2G19130 | Putative G-type lectin S-receptor-like serine/threonine-protein kinase SD2-5  |       | -2.33 |       |       |
| Cc04_g10770 | AT1G66920 | Putative Probable receptor-like protein kinase At1g67000                      |       | -2.08 |       |       |
| Cc02_g12050 | AT4G27300 | G-type lectin S-receptor-like serine/threonine-protein kinase At4g03230       |       | -2.01 |       |       |
| Cc02_g15310 |           | Putative Probable LRR receptor-like serine/threonine-protein kinase At3g47570 |       | -3.47 |       |       |
| Cc06_g16950 |           | G-type lectin S-receptor-like serine/threonine-protein kinase SD3-1           |       | -2.27 |       |       |
| Cc10_g10380 |           | Calcium-dependent protein kinase 11                                           |       | -1.39 |       |       |
| Cc03_g13330 |           | Putative LRR receptor-like serine/threonine-protein kinase EFR                |       | -6.02 |       |       |
| Cc07_g13130 | AT1G66150 | Probable receptor protein kinase TMK1                                         | -8.95 | -7.79 |       | -5.81 |
| Cc05_g09440 | AT2G42880 | Mitogen-activated protein kinase 10                                           | 1.76  | 2.24  |       | 1.16  |
| Cc08_g15160 |           | Mitogen-activated protein kinase 4                                            |       | -1.33 |       |       |
| Cc03_g02630 | AT3G21510 | Histidine-containing phosphotransfer protein 1                                |       |       |       | 1.85  |
| Cc03_g03500 |           | Cyclin T1                                                                     |       |       | 1.15  | 1.14  |
| Cc03_g03490 | AT4G19600 | Putative uncharacterized protein                                              |       |       | 1.08  |       |
| Cc04_g10020 |           | SNF1-related protein kinase regulatory subunit gamma-1                        |       |       | 1.43  |       |
| Cc07_g12970 |           | TPX2 (targeting protein for Xklp2) protein family                             |       |       | -6.66 | -9.1  |
| Cc02_g03820 |           | Putative Cell cycle regulated microtubule associated protein                  |       | -5.36 |       |       |
